# Supplementary material
Source: publisher figshare collection journal article supplement (https://frontiersin.figshare.com/ndownloader/files/25261583)
Supplement: Supplementary file 5 [file 25261583]

Archive with 106 entries (95 files):
- yt_recommendation/
- yt_recommendation/.idea/
- yt_recommendation/.idea/inspectionProfiles/
- yt_recommendation/.idea/inspectionProfiles/profiles_settings.xml
- yt_recommendation/.idea/.gitignore
- yt_recommendation/.idea/misc.xml
- yt_recommendation/.idea/modules.xml
- yt_recommendation/.idea/other.xml
- yt_recommendation/.idea/vcs.xml
- yt_recommendation/.idea/workspace.xml
- yt_recommendation/.idea/yt_recommendation.iml
- yt_recommendation/code/
- yt_recommendation/code/__pycache__/
- yt_recommendation/code/__pycache__/generate_figures.cpython-37.pyc
- yt_recommendation/code/figures/
- yt_recommendation/code/figures/Fig_01b.pdf
- yt_recommendation/code/figures/Fig_0X.pdf
- yt_recommendation/code/figures/Fig_0Y.pdf
- yt_recommendation/code/figures/Fig_01.xcf
- yt_recommendation/code/figures/Fig_01a.pdf
- yt_recommendation/code/figures/Fig_02v1.pdf
- yt_recommendation/code/figures/Fig_02v1.png
- yt_recommendation/code/figures/Fig_01a.png
- yt_recommendation/code/figures/Fig_01b.png
- yt_recommendation/code/figures/Fig_0Za.pdf
- yt_recommendation/code/figures/Fig_0Zb.pdf
- yt_recommendation/code/figures/Fig_0Zc.pdf
- yt_recommendation/code/figures/Fig_02.odp
- yt_recommendation/code/figures/Fig_02.pdf
- yt_recommendation/code/figures/Fig_0X.eps
- yt_recommendation/code/figures/Fig_01.odt
- yt_recommendation/code/figures/Fig_0Y.eps
- yt_recommendation/code/figures/Fig_0Za.eps
- yt_recommendation/code/figures/Fig_0Zb.eps
- yt_recommendation/code/figures/Fig_0Zc.eps
- yt_recommendation/code/figures/Fig_02v1.odp
- yt_recommendation/code/figures/Fig_01.pdf
- yt_recommendation/code/generate_figures.py
- yt_recommendation/code/.vscode/
- yt_recommendation/code/.vscode/settings.json
- yt_recommendation/data/
- yt_recommendation/data/01-initial_ytdt_query/
- yt_recommendation/data/01-initial_ytdt_query/query_1-videonet_channels_search50_nodes1714_2020_02_10-19_04_01.gdf
- yt_recommendation/data/01-initial_ytdt_query/query_1-videonet_search50_nodes1714_2020_02_10-19_04_01.gdf
- yt_recommendation/data/01-initial_ytdt_query/query_2-videonet_channels_search50_nodes2135_2020_02_10-19_36_36.gdf
- yt_recommendation/data/01-initial_ytdt_query/query_2-videonet_search50_nodes2135_2020_02_10-19_36_36.gdf
- yt_recommendation/data/01-initial_ytdt_query/query_3-videonet_channels_search50_nodes2286_2020_02_10-20_46_32.gdf
- yt_recommendation/data/01-initial_ytdt_query/query_3-videonet_search50_nodes2286_2020_02_10-20_46_32.gdf
- yt_recommendation/data/02-machado_2020_sample/
- yt_recommendation/data/02-machado_2020_sample/machado_2020-vaccine_md_videos_extra.csv
- yt_recommendation/data/02-machado_2020_sample/machado_2020-vaccine_md_videos.csv
- yt_recommendation/data/02-machado_2020_sample/machado_2020-sample.ods
- yt_recommendation/data/02-machado_2020_sample/machado_2020-triplicate_vacinaautismo_data.csv
- yt_recommendation/LICENSE.md
- yt_recommendation/README.md
- yt_recommendation/screenshots_m&d/
- yt_recommendation/screenshots_m&d/0N2rqAHsxcs_1.png
- yt_recommendation/screenshots_m&d/0N2rqAHsxcs_2.png
- yt_recommendation/screenshots_m&d/0UUWs5e8cB0_1.png
- yt_recommendation/screenshots_m&d/0UUWs5e8cB0_2.png
- yt_recommendation/screenshots_m&d/5ymr8JwOcHw_1.png
- yt_recommendation/screenshots_m&d/5ymr8JwOcHw_2.png
- yt_recommendation/screenshots_m&d/5ymr8JwOcHw_3.png
- yt_recommendation/screenshots_m&d/5ymr8JwOcHw_4.png
- yt_recommendation/screenshots_m&d/EI5s35zohtk_1.png
- yt_recommendation/screenshots_m&d/EI5s35zohtk_2.png
- yt_recommendation/screenshots_m&d/J3E_EPWRu38_1.png
- yt_recommendation/screenshots_m&d/J3E_EPWRu38_2.png
- yt_recommendation/screenshots_m&d/JaMDUQyG0as_1.png
- yt_recommendation/screenshots_m&d/JaMDUQyG0as_2.png
- yt_recommendation/screenshots_m&d/KdCCbazbKAI_1.png
- yt_recommendation/screenshots_m&d/KdCCbazbKAI_2.png
- yt_recommendation/screenshots_m&d/KdCCbazbKAI_3.png
- yt_recommendation/screenshots_m&d/KdCCbazbKAI_4.png
- yt_recommendation/screenshots_m&d/KdCCbazbKAI_5.png
- yt_recommendation/screenshots_m&d/KdCCbazbKAI_6.png
- yt_recommendation/screenshots_m&d/KdCCbazbKAI_7.png
- yt_recommendation/screenshots_m&d/KdCCbazbKAI_8.png
- yt_recommendation/screenshots_m&d/KdCCbazbKAI_9.png
- yt_recommendation/screenshots_m&d/nlmrbytZh4A_1.png
- yt_recommendation/screenshots_m&d/nlmrbytZh4A_2.png
- yt_recommendation/screenshots_m&d/nlmrbytZh4A_3.png
- yt_recommendation/screenshots_m&d/nlmrbytZh4A_4.png
- yt_recommendation/screenshots_m&d/PnF0X7gY4io_1.png
- yt_recommendation/screenshots_m&d/PnF0X7gY4io_2.png
- yt_recommendation/screenshots_m&d/syA6bkZMd6s_1.png
- yt_recommendation/screenshots_m&d/syA6bkZMd6s_2.png
- yt_recommendation/screenshots_m&d/syA6bkZMd6s_3.png
- yt_recommendation/screenshots_m&d/syA6bkZMd6s_4.png
- yt_recommendation/screenshots_m&d/syA6bkZMd6s_5.png
- yt_recommendation/screenshots_m&d/syA6bkZMd6s_6.png
- yt_recommendation/screenshots_m&d/syA6bkZMd6s_7.png
- yt_recommendation/screenshots_m&d/syA6bkZMd6s_8.png
- yt_recommendation/screenshots_m&d/syA6bkZMd6s_9.png
- yt_recommendation/screenshots_m&d/syA6bkZMd6s_10.png
- yt_recommendation/screenshots_m&d/syA6bkZMd6s_11.png
- yt_recommendation/screenshots_m&d/syA6bkZMd6s_12.png
- yt_recommendation/screenshots_m&d/T1ArUvap1NI_1.png
- yt_recommendation/screenshots_m&d/T1ArUvap1NI_2.png
- yt_recommendation/screenshots_m&d/T1ArUvap1NI_3.png
- yt_recommendation/screenshots_m&d/T1ArUvap1NI_4.png
- yt_recommendation/screenshots_m&d/tCA1OSWEors.png
- yt_recommendation/screenshots_m&d/tD6EYsXAS6A_1.png
- yt_recommendation/screenshots_m&d/tD6EYsXAS6A_2.png
- yt_recommendation/screenshots_m&d/YEkJKC5mgBs_1.png
- yt_recommendation/screenshots_m&d/YEkJKC5mgBs_2.png
