# Supplementary material
Source: publisher figshare collection journal article supplement (https://frontiersin.figshare.com/ndownloader/files/25261583)
Supplement: Supplementary file 5 [file 25261583 › yt_recommendation/code/figures/Fig_02.odp]

## Slide: page1
Dr. Lair Ribeiro Oficial
(Official)


Minha Saúde — Curas Naturais
(My Health — Natural Cures)
O Melhor Para Você
(The Best For You)
U MIÓ QUE TÁ TENO
(DA BEST OF WATSUP)
aphomeopatiaTV
Ana Paula Palagar
Cizio Oliveira
Ezequiel Cordeiro — Hora Final
(Final Hour)
Palestrante (Speaker)
Tiago Rocha
Junior Hallak
Medicina e Saúde
(Medicine and Health)
nutrição Alimentos & Cia
(nutrition Food & Co.)
SAÚDE & BEM ESTAR
(HEALTH & WELLNESS)


 
 
 
 

 
 
 
