# Supplementary material
Source: publisher figshare collection journal article supplement (https://frontiersin.figshare.com/ndownloader/files/25261583)
Supplement: Supplementary file 5 [file 25261583 › yt_recommendation/code/figures/Fig_02v1.odp]

## Slide: page1
Dr. Lair Ribeiro Oficial


Minha Saúde — Curas Naturais
O Melhor Para Você
U MIÓ QUE TÁ TENO
aphomeopatiaTV
Ana Paula Palagar
Cizio Oliveira
Ezequiel Cordeiro — Hora Final
Palestrante Tiago Rocha
Junior Hallak
Medicina e Saúde
nutrição Alimentos & Cia
SAÚDE & BEM ESTAR


 
 
 
 

 
 
 
