# Supplementary material
Source: publisher figshare collection journal article supplement (https://frontiersin.figshare.com/ndownloader/files/25261583)
Supplement: Supplementary file 5 [file 25261583 › yt_recommendation/data/01-initial_ytdt_query/query_1-videonet_channels_search50_nodes1714_2020_02_10-19_04_01.gdf]

nodedef>name VARCHAR	label VARCHAR
UCHyeOQ0-Td0Dv3xfI0dwu3g	Universidade da Química
UCuAaB8lLRmoZzOrc_d_Ka0A	CBI of Miami
UC9zqTTVeClpqMQ5CLuJdWtw	Drauzio Varella
UCN-opsqqDunWO6h5uCp9Y4g	Hoje em Dia
UCSv9d0kQegylHWpP83jWSQg	tvbrasil
UCMMJm4lYxEh7GM4loYh6-SQ	programaViaLegal
UC8b-2BfQ-PpYKESOfEGhYBQ	Vencer Autismo
UCGILPX9AE6hZpqp1FjFn6pw	SegredosDaLaurinha
UC3Ooj_iDWELBumIEDejyNHQ	BláBláLogia
UChsZDP7pW_08Sk6Tp4U8KJA	Dicas do Salgueiro
UCu_a6PAzp30Bn2mM-Ll09LA	RECORD TV
UCthbIFAxbXTTQEC7EcQvP1Q	BBC News Brasil
UCyuDCBA1ig-x1YeAQBX2b4g	Scio Education
UCP391YRAjSOdM_bwievgaZA	Jovem Pan News
UCH2VZQBLFTOp6I_qgnBJCuQ	Canal Nostalgia
UCBx_CluVFNvy0TXsmNBZ-ow	PUC TV GOIÁS
UCVqS-HRwe2vq_Jjgu4fg-UA	Dr. Uronal Zancan
UCtym0q5w1NeYqVjzSwRntgQ	Elcio da Silveira Machado
UCgbbjw8zPkrmmL_XU1SgJBg	Criar e Crescer
UCnNvQI_yyWPZGI-rqFhR17Q	O Lado Bom do Mundo
UC9fxSdFjcz5QWDEhYCk_k1w	Fafá conta histórias
UCl1eRuftjRdetdWkrbeDBGg	Celso Cavallini
UCvLNnnIZdqXYqAS-l8FLJFw	ESCUDO pt
UCf9lX9Vc4CWBUKQxVfZ6MtQ	Juntando as Peças do Autismo
UCGfBE94turq_hyKMxB-Dfrg	Ver Mais Londrina
UC12zKGLhMhDeDidoctM6BrA	Ministério da Saúde
UC-4ddcVkyrXXbBqedYV4l9Q	Confederação Nacional do Comércio de Bens Serviços e Turismo
UCWq1xltHB2fDe6YkYoOrryg	Canal do Schwarza
UCKtJs_zI1yzswHDWqkqHtWw	Dra Ana Escobar
UCoa-D_VfMkFrCYodrOC9-mA	Band Jornalismo
UC5ZXYxeWlROKbL7JziJ0bIQ	O Historiador
UC-v1PJRoid6DGFzY1jVU3hg	Andre Chilano
UCz54U1Ts7JR7ZtSiClcVOOw	UFLA
UCk9mgpQVdJ5oKQWkM1UPBaQ	Dr. Lair Ribeiro Oficial
UCdGpd0gNn38UKwoncZd9rmA	Canal do Pirulla
UC5o3Raq_jrrSFZ5rkC8uBvw	Momento Aleatório
UClu474HMt895mVxZdlIHXEA	Nerdologia
UCUtDAMp91VCfHTZ9_ypKRPA	Unimed Fortaleza
UCdKJlY5eAoSumIlcOcYxIGg	Nunca vi 1 cientista
UCWo6OpatSyHZijRG_MwObFA	Leonardo Guimarães
UCNl_i-ggJbZNyOLlhE7yyhw	Jornal da Gazeta
UCa1o8yRux22rDwRbEjokSPg	Viver com Saúde e Atitude
UCyoGb3SMlTlB8CLGVH4c8Rw	euronews (en español)
UCXj2oSzwg6G0iBjKg33joMQ	Khan Academy Brasil
UC0LDNBjI8prPXedEj3QosOQ	Odilon Cardoso de Farias
UCk0U1Js-um2lRjSF3VoS_3A	Luna ABA
UCG-eghyORxNrzSG8FkAWKyw	Biologia Total com Prof. Jubilut
UCcoPc-BqFPkVkkwyS35J-ng	Revista Novo Tempo
UCPR3gVNYBzi-02_O4noC1Zg	Junior Hallak Medicina e Saúde
UC3PLVO-mt6ZQLiySKdJedCA	Familia Jones
UCF8Uaj9cnSkL-63NSPnBVCQ	Ação Autismo
UCz1xVDltULzUhZCJ1TkvnTQ	Mamãe Tagarela
UCe1XNXkGImWSq5n4wkzNjBw	SAÚDE & BEM ESTAR
UC9GFu08xsidnYq_qiJlTcug	ClickCiência UFSCar
UCwQhAc44SfDvhdCQiHluBVQ	O NATURAL É MELHOR
UCVPdtCCsEsem4hyVwS_GzOQ	O Melhor Para Você
UCuqsl-IppoFW0uNPQfbXAVg	RECEITAS E DICAS DE SAÚDE
UC4F32QLrpDmmRrozxr9z59g	U MIÓ QUE TÁ TENO
UCv3JgOy__M8B3xsa5adWR6g	Jorge S
UCP-Vg2PcmLiWpEdvMI1R35w	Domingo Espetacular
UCE0KRm8m9_ki8MrMYGyjpAw	Medicina Resumida
UCxt_nr6Xwbq4O2Ur9ZBpgAA	Conexão Futura
UCykUsChWx0cy2ZRn3r0s5qQ	Cachalote Documentários
UCFbx6QBTcDI6toOnO-EyajQ	Dra Maria Claudia Brito
UCR9EXU15wObpFMDyQmHXeuw	Banguela Reversa
UCrSM1UV_KLAdTzgxyxl3POw	Olá Ciência!
UCyjo9Vr-Okmq7OHYyEQHGTQ	APAIXONADA MATERNIDADE
UC4_WOkaSB6TMFad-v0T6qmg	Dra Tielle Machado
UC7m35AnSXe8aSsBWRCPEQ1g	Dr. Evandro Salgado
UCXogxn8ApsdqeXyIDvBWOzg	Ismael Sobrinho
UCPGGSQfN8LREy6dWdk85fpw	Dr Juliano Pimentel
UC2mdv67uDPQO35IYkzK_Xzw	Autistologos Autismo
UCquENngBYGYpHYtN0OVYLKQ	Bruno S. Alves
UCvsvFTlOWSFU_RBinLDU7Ow	Professores do Brasil - Prof. Sergio Oliveira
UCrtNrQTDykcrtfYMkggmV5g	Vinicius Alves
UCKHhA5hN2UohhFDfNXB_cvQ	Manual do Mundo
UC4zG6UeNUn-HM6UEFFkiESA	Aulalivre - Enem 2020 e vestibulares
UCsla1_l383BhIiki4Gj3d8w	NeuroConecta
UCA1nC2t2zfzBOySscmpIzGQ	Aline Vicente
UCI2EhvTADDdOex2nBIRsigw	PortalEducacao
UCqZN-NqgP7bhbctbyThSVUA	Balanço Geral
UCDtVoSwSwQgwhcC89Nlz5Vg	Mulheres
UChHd-MU2mOvZHmBQz6zJw_w	EnfConcursos - Enfermagem para Concursos
UCxucJ9P3mLMneYypLZYn2uw	Você Bonita
UCUp-GSUuNxSZ7cxOg7ZnyqA	Tua Saúde
UCIQPHl1WKKTt9KkWyo_JNig	INCRÍVEL
UC8IbAhPglJ1OeC44A_Gtmqg	Enfermundo
UCViYj9umcJZdjKITQrB1D5A	Doutor TV
UCVFbXI6Gu8U2f9Gjtxw4A-Q	UOL
UCsW2F43izuIFU58yq_anyDA	Dra. Gisela Savioli - Nutricionista
UCZ4pDPv5kdO_2Da5brOlOZQ	Canal do Ferreira
UCnwxA62CqAnW_z0n4WLbp6A	Pediatra na Web
UCJMH8GNRXMjr2uGci28v9_g	Gemeas Japonesas
UCy7oVBYY0FGXeeJpy6ITXxQ	Almanaque dos Pais
UCDes47D0_xrzOm_r7b9RQAQ	Balanço Geral Oeste
UCORRcj9wv5DEYCEg2LhBcLQ	WELIDA DANCINI
UC2mmP8ysfyko40KSn90x6Og	Canal Futura
UCR2IONXExRWEGxREw7lXHCQ	Tia Dani
UCD9kk0EUEtflrRl6TV0lDyA	ENFrente Enfermagem Continuada
UCZmc8QllMtE-fr51p1niyjw	MaterniArte
UC8CYH-5VBNcMj9wta4W8cPw	Jéssica Machado
UCQdOZmbeT9UoQy8G3zeNE-g	Papo de Mãe TV Cultura
UCV6Ue4o5UIeKQ3IEkjnXRlg	vejapontocom
UCq8ChnGCYMVCzDgGMK9e91A	Anii G.
UCyvhqROV3luJvtt2dLTFhAA	Balanço Geral Itajaí
UCMYTIyqS1-7wT-3pBB8bR5A	Minha Vida
UCOcG-EPdn2gsWVuMpF1TRVA	Stefany Rago
UCT0ECF7TihWahDqpU2i9tQA	Gustavo TV
UCOQ_KwPhg3IZbigiK7NCnfQ	Yasmin Galvão
UC0nblCDJx75fBCDDqTCKHaQ	Dra Luciana Herrero
UCi2zMfox-UpFGAFfsMXqYfQ	Alexandre Feldman
UCVrKQMmA2ew9LFzeIDaOFgw	TV Canção Nova
UC4JEf2ejgucNsmsFiEy0mSw	Dicas Lara Ferreira
UCyE4KeQg54Bx34LxQB22xkw	Priscila Simões
UCOS_wL35NuMn8qLASOQqfUQ	Mari Cavilha
UCRlrE2ZyiPLyS61pgJCIoUA	Patricia Bencardini
UCL41BsrnhsSSXG4zYwqC95g	Somos Enfermagem TV
UCcnuou4Sjm-qF87yzWve1ug	Agência Casa Mais
UC9gmqJKNBOyCl2KLdJIv0mQ	Tele Educa Mato Grosso
UCq7xmFdlNNXgCRIq7G-5RxQ	Vanessa Leal
UCTGVdd_qB7Rz4X4oAKZ0kyg	aphomeopatiaTV
UC01Os2Eeg6MCABfv384yKyQ	Josilma Salviano
UCNMwzMh0MW_J_nK9kMS4ldg	Capixaba Otário
UC4t2mdI8uAiJDJSRjiWJT1Q	Gabriela Rocha
UC1RnMyP-HfZCyMLX0TmyMTg	Master D Portugal
UCXQatvGsVCzrm35PnxoHJsA	Pai_xao Vlogs
UCl01kak5i66hCdS_bCxkkgA	TEA Vamos Falar Sobre Autismo
UC49x20RykBnDY1RFHkdDnsw	Meu Coração Saudável
UCWX70TFNwDsBLYlRzOe_-zw	Balanço Geral Joinville
UC1_-z9fMYofIUQWYUPoNyTw	Pediatria Do Estilo de Vida
UCyhRfD3HkB-0VbFA1prxjxw	Encarando o Sobrenatural Oficial
UCplIRjNdaKLVrAS4D-Dil7Q	Donaldo Bezerra
UCV9EVCVbJus_StqIJ89ajLA	Fernando Channoschi
UC8hGUtfEgvvnp6IaHSAg1OQ	Jair Bolsonaro
UCLxU3sH6BpHnqDRBXgGmUPw	renanrob
UC3lP5c55UE0ozG-uN0uBsXg	Andréa Werner
UCqF3BLbPXpNGNgsV3oJvDlw	Mundo Autista
UC42k7FI53tnSSIjgzW-rbLA	Mayra Gaiato
UCGTfGu7XEakOH2wL1Si2rqA	Leonardo Leao
UCAJAbdjUtxGM9zaD_epYpcA	TV SUPREN
UCRuR7ytSs0YokBvxr8rM3ZQ	Biologia Digital
UCA2llkURdTm63bBB3nTBw1w	Carla Ulliane
UC6RQhzm93SterWntL7GzqYQ	Olavo de Carvalho
UCLHpzj63LeJ-IoRSGB3V2fg	TDAH - Ciência e Aprendizagem
UCPCwZ6sP0cAwgMsGZ23rOYA	NAMU
UCepEtTIMTtU-MbFHz-pOZMw	Caio Bottura
UCbhT_vtlwr7X2wG6q_0mWVQ	Diário de um autista
UCuiLR4p6wQ3xLEm15pEn1Xw	Record News
UCUM4-KGZEXC2pk6zRDL9jMQ	MyNews
UCOqOdxzU58qOGoysdnVXd9Q	Débora Francelino
UCpuW6sUUE2Y0xW-KZhm347A	H2O Meninas Sereias
UCRfUfNEJVaY8AbAcb46qX0g	falandoverdades.com.br
UCghJZXv-Cg90zgdeTZCt_-A	NeuroSaber
UCYfLDf9dRO6SW0hO2nPewrw	Wiki GLOBAL Pédia
UCkrcoalvMERq3ehh5gH5j0Q	TV Mundo Maior
UCil8_HWnWScf4Xmt4FSdU7w	Eli Vieira
UC-WaPlIfAQP3IuydN6dhbhA	Nós e o Autismo
UC1LRaE3XaXAanf1XJXgrVIw	LiberdadeNatural
UCdKg0aioEqn_tbfBGz_ltFw	Ivandélio Sanctus
UC3vZWDAhX5356m17Vy1B2GA	Atalaia De Yeshua
UCsAMQ6_-iRdEWBVh8q-IXmA	Verdades Ocultas e Inconvenientes!
UCT913ORodTxCG9HdXroYPtQ	Maravilhas Di Noni
UCsT0YIqwnpJCM-mx7-gSA4Q	TEDx Talks
UC5hGM-gAk5I8zmn8xUKuNkw	Programa Ver Mais Oeste
UCmpHPgeCBgvk_fDXZQKsnAA	Jornal da Record
UCGuv-PMjNhYc9wyZFr15ASg	conmarc
UCqALeERk6OhLGaG_PIG_RJA	Vivendo a Inclusão
UCO5eykNr9w8p5eoGQz3AFfg	TVTEC Jundiaí
UC2qRcwgwOLchPYFPqCCHVhQ	Bosque Oriri
UCJIKKHplhnzcDmpztqUO7nA	Qvida Boa
UCJUhAFvFypnG_E7vWimQQYw	Autismo em Evidências
UC5xF-T4J_uM0NrCkOO5e0PQ	Amarilys Toledo Cesar
UCmEClzCBDx-vrt0GuSKBd9g	Jovem Nerd
UCB0zinWfy-dS_NqcOINYo3A	Minuto da Terra
UC0ABb9XMjG8M_rmxbxtW6Qw	Mural Científico
UCbrt8UdV49AqgT7-VaXmlwQ	Dragões de Garagem
UCLXl1V6n82Dyg1VhVgSL0nw	Aviões e Músicas
UCsYo9r-JIEkhoRoc9G5gdpQ	Pediatria para Todos
UCl10NIdDOn9MMWdKNyo_YdA	Canal do Slow
UCn9Erjy00mpnWeLnRqhsA1g	Ciência Todo Dia
UCflCE9dixPqeC_EaSqQAqrw	Refúgio Cult
UC-NwgkrLPYmzM-xoLr2GX-Q	Ideias Radicais
UCstACT0WwMpTjTrbpFYk16Q	FLAVIO VALLE
UCXuqSBlHAE6Xw-yeJA0Tunw	Linus Tech Tips
UCDlVDJqYqHYEcgHRn8Mf25g	IDOLOS
UCN1ihdoKXeixzYi7Hyp4WwQ	Canal USP
UC6OUstIo-qXiJzcsJ0toz-A	Misfits Podcast
UCDK5XAOArmsSQKZ_kBoYKOA	Jailson Miranda
UCjaWLFTNqLkq3ZY2BJ4NYRg	TV BrasilGov
UCwJXtk_1CKlCrh7YJDP2uPw	KyodoNews
UCaEplKvlFhyg7P3eBmRtyCQ	acvitorio
UCzYrkkCI1yvqvQyD-j56RIA	Lucas Pinheiro
UClcatj2SigXMklFrqQtnA-Q	VAI UMA MÃOZINHA AI?
UCmV27tf2iqUZDDtXiShSKUg	CCATES
UCfYrK5JU5EznsnK3wQE7iIg	TV Aparecida
UC4MWeXk20bRyIGQsiZXPe6Q	Tv Saúde Brasil
UC_53VGoH_0XLFmYVpGMvhvg	Curso Enem Gratuito
UCp6tx5isUZCgQnvEwbOVC-Q	Câmera Record
UCXdXYG8dUmEv6jhEji_lSHg	Jornalismo TV Cultura
UCv2svvDbMNunUuPs8hUUKVA	Catraca Livre
UCT0JugAtGmqiYkwxFZOwAtg	Descomplica
UCJWBZ_U49wLgqS5fefJ7STw	Vlog Da Chaylla Alax
UCUmEPYxmnyQDeRUcFkslmQw	euronews (em português)
UCoyhq57ClXRTd4h8vpiMelA	Faz Bem Dicas de Saúde
UCrRLxJiZvwAAWj0bcxdvPAA	Diário Natureba
UCEWHPFNilsT0IfQfutVzsag	Porta dos Fundos
UCjjYaSHsZSUNTSwUV8OfOrA	Planalto
UCtrjFP7i92_30uv6IehwE5Q	Cadê a chave?
UCh7TUTXojlE8vRtb-EnuDzw	Metaforando
UCbAiIkPobUFy71zlmwVw3jw	Fatos Desconhecidos
UCV306eHqgo0LvBf3Mh36AHg	Felipe Neto
UCsgHWN8lYveMUEWTDheTjZA	Brasil Escola
UCbeCLZ2E_oD071BkTCw5uRQ	Bruno Dias Jornalista
UCPQqOZhDKr9AjLfXDOjoaww	Mundo Bizarro /Jr
UCLWAkPY5RjvCuwJu_C3Ok-A	Juliana Priscila
UC7qK1TCeLAr8qOeclO-s39g	Terça Livre TV
UCQz-h9kq50OxKmU2yGoOWlg	Fabio Click Time
UCkSjy-IOEq-eMtarZl2uH1Q	Mamaefalei
UCwVmZjJwkCUCOes5_eAIebg	Fala Brasil
UCSyUhW3u3JazIT3VtE4nCEw	Rômulo Maraschin
UCr0NQAx7C64fOrNxVdc8gYA	Firmeza da Verdade
UC45WrWwAypYvlhYbuG9UNqQ	Wolmar Carregozi
UCFl00VTEDEA0cHCoMQ7CuZg	Rede Super de Televisão
UCzzv3f3UIhYZlIeuOl2QH9Q	Beep Saúde
UCCD5yY6oDcu-PvLnP4FIJ8A	Vida Melhor
UCNmv_2YqryuyhB79ehzOsmQ	Direção-Geral da Saúde
UCCWZCP1lQxWvjQUUOWc6dFw	Ruth Avelino
UCK0SYPK1n9055P-JjLkOZJw	Hospital Israelita Albert Einstein
UC1VlEIPGhDqaUsL7Vg__hHA	HMSPortugal
UCzDQaYfHMJrXfw46whk6hIg	Jolivi Saúde
UCcSJI9MVSPEhKt5OnOv2Mdw	marcoaurelionunes1
UChFmohIxapcro2kigBCT_AQ	Camila Delmondes Dias
UCKWtY_NSa3xTkz0YT28QNSg	Enf. Leandro Bauer
UCj0aH1oJz-m3n6TDW-Ly20w	Saúde Dicas - Oficial
UCT2X19JJaJGUN7mrYuImANQ	America s Got Talent
UCvgfXK4nTYKudb0rFR6noLA	UFC - Ultimate Fighting Championship
UCsTcErHg8oDvUnTzoqsYeNw	Unbox Therapy
UCGwu0nbY2wSkW8N-cghnLpA	Jaiden Animations
UC789h3eqw0H1HqGmIsI26OA	TheMacLife
UCX6OQ3DkcsbYNE6H8uQQuVA	MrBeast
UCwO_xoYm2vjhu4kZSxFO5mA	goonzquad
UCMNmwqCtCSpftrbvR3KkHDA	Guava Juice
UCZWlScCmjiezyIRAybUgXYQ	Film Independent
UCilwZiBBfI9X6yiZRzWty8Q	FaZe Rug
UC3EFKdXAU99j3ppGgvTz7XQ	Bretman Rock
UC0otZdGYsA9KqVKAcn2peQA	Brancoala
UCF5OxapO7zJUkX9EYvGwN_Q	Fatos Insanos
UCuxfOdbKQy0tgGXcm9sjHiw	Coisa de Nerd
UCj0O6W8yDuLg3iraAXKgCrQ	Você Sabia?
UCgWOsOjYMJyndvwyU9gzBKQ	Universo Curioso
UC13ikrGSy3E2AveqLAI9lqg	Richard Rasmussen
UCJWCecuSUa9CsNQ4MGJ_g3A	Rocketz Labz
UCzGwyAyWLB2Si6VDFpq8rjw	Dois Dedos de Teologia
UCweLVJlESUt6fCdDFeDXgcA	Felipe Castanhari
UCjWw8sBL0PPZLPxusmNLvAQ	Legião Sobrenatural TM
UCnU2EtUW8Z4DxSqXxJ5cMQg	Cellbit
UCk5P5ft8WxlmBrvwmqmYLwQ	gabi reborn
UCaSAM5kna2KyX-uVLSGr8PQ	omeleteve
UCOX1xjMcnZVmV-yx0VC6Fvg	Dr J Bussade
UC2oZNzo6o37qejkFQE2dIAA	CAROL MOREIRA
UCTe18hXXnFNL7FDdnVfIqEQ	Zelune
UCbxeWUKWro8bMscsa36-BtA	Zabetta Macarini
UCpwFulVhWRsS92nYOTdh-uw	Mari e Tha
UCgheXPYps0uCdB60AvUQYbg	Magalzão Show
UCWijW6tW0iI5ghsAbWDFtTg	Rádio BandNews FM
UCyG6SY3s8fS7ZKje6lv1JKg	MSFBrasil
UCwumfjrPgLl0H2wS7juY5Xw	Fundação SOS Mata Atlântica
UCKXlbJbeAb8uTdRHJhlwE1g	Canal CAPSLOCK
UCYALxwppPJjYyTMEwwEcNCQ	LubaTV
UCT4jm6o-mUMuo1bKHcHSIfA	izzynobre
UC_vFhB8UkkdeiOOOZTeXG7A	Diy com Fabiana Nogueira
UCNjPniJ9bZuCDQXCRqNsCBQ	SAS Educacao
UC_er6_R1PKUCxc7QSXxIvzw	Sua Saúde na Rede
UCvNbTU5NSQ_K8cWfY9OmWsw	TV UFMG
UCPU9R4M0Fruz-E2Vo9KEmAQ	Hospital Samaritano
UCXLe20604d4XVV_Z6cQc-gg	TV SIM Linhares
UCkke64Kird1ZcZsPJEo_hYg	Aplicar Conteúdos em Saúde
UCm-XT_NupkfP-19ZE8QJACA	My Pets Nanny
UCr9Jv4BCx_EZ3-RiuYwQXqg	Gatil Hauser - Gatos persas e exóticos
UCLWEHMfQsBVlIEQicwXtb1w	Mundo Caipira - Rodrigo Matos
UC19aAr6UojQesIVCBsXJGIw	O Que Não Dizer Oficial
UCvi6qsQ6iqHWDph-ckhX5GQ	Canil Rott Haus
UCN9eb1Z__4hietbXmwxOglw	Natureba - Curas Naturais
UCgDb_6JF3elI2CFR9SqSbwA	João Carlos Baldan Acupuntura e Saúde Quântica
UCfIlLA5vyrS8PgzSOKE2GBw	Doce Limão
UC5eWe0ULMB-T72sAL5ybArg	Autismo.Apoio. e.Desabafos
UCFiEI1kDHlO9UQtxx0wj-XA	Minutos Psíquicos
UC81fUuO3oGR-ju7tEAuyNPA	Dra. Andreia Torres
UC33LTYvNoNvpx7D5qezhxew	doutorbarakat_snapchat
UCgfgPyU5Vc4s1tyBSM6CCvw	Fala Fono por Juliana Trentini
UClGVPnkZ62SuUbE4EqTDIYg	Instituto de Educação e Análise do Comportamento
UCuFi5ZBiy2IgvwVRRhsazQA	Autista Sem Regras
UCcpEuvf0WL27bLso2tK1DLQ	Mairy Ribeiro
UClN6OLbLp1YjTSwDOkEM2dA	Dr. Dayan Siebra
UC9Xzfea9PyVFl_jmbKVuxAg	Paula Penteado
UCewz-5dLWu_rswIMStBBI1Q	Dr. Ícaro Alves
UCAcm_kK9LeKsqntNX_5J9Rg	CARAS Brasil
UCZMequcevIbkS-_LLAizS1w	Nosso Futuro Roubado
UCoPDcjdXmHCFyW7Pz9DBCOQ	UnisulTV
UCmQK52xYtdeg7EYiQhqEeZA	Body Mind Zone
UCwobzUc3z-0PrFpoRxNszXQ	Yellow Brick Cinema - Relaxing Music
UCnyFZr3wJBAJRjcqr_Q5Gug	Centro de Telessaúde HC-UFMG
UC0Q3GfF9amdyyjTA9DpTnyw	Canal Saúde Oficial
UC8Ciiz3QHgziGJXa4BPY7sQ	Vencer o Câncer
UCC1_Drela_P4MAW8pPcdjSw	Julio Pereira - Neurocirurgião
UCSFQIz7KvEWSwuCCh_zh_0Q	Renato Sabbatini
UCg3fYev0mdtUvJvFJpQUM8g	TelessaudeSC
UCY3bccBm-_J8m0-SQz2AbAg	De bem com a Vida
UCuSEQ1Ebc3lS5FrwGKpbtkA	10 Minutos de Saúde
UCEKBa8byszeoA0f7lt1ledg	TV Paranaíba
UCeoHCxOOPTeT9Pp_qi8HmHg	Dra. Graciela Morgado
UCCUJDced0JrM5EmfdnhuRJw	Daniel Cunha
UC3O9y5JRSBqn4YhCEvBys_Q	Dr. Igor Padovesi
UCeDX3cRwyEND1InTK4Iod2g	João Carlos Baldan
UCeGhoo58OOV262hAkG2eBnQ	Mai Rob
UCemIxU4HzIhVLeohT7eUUoA	Psiquiatra Fernando Fernandes
UCNy6EtpfR05_vGNPkb-xQBA	Danny Martins
UCl4jPGdW6YDo-1KgU5q8T1g	Avv. Saverio Crea
UCo9oJoBqutAtWI5Jb-_EQWQ	Diego Ferreira
UCfEQnRUpLwlf85pcXBukT_A	EFCAS1000
UC-RhfF4_tepYCgSZuGLSzpw	Eduardo Salomão
UCGKQmZBLf_233edf8XzteqQ	INCT do Sangue
UCW4t6ozY9VDVeN_GHK260BQ	Todo Seu
UC5Bh3Ljo71O9uML6paQVAfQ	Instituto Butantan
UCjVPaRkoIgq_Whb1QkJjGKg	Dr Lucas Fustinoni
UC3UMFl4FxufRp6YErllpxHQ	Metrus Instituto de Seguridade Social
UCZ4wREznHPRuUz-ghmp7KGw	Professor Fernando Braga
UCsCeWWW8sk8zDaPzw6Ll67g	seligajapa
UCz84Tivi_d214XXnxGbtKHQ	Jaime Bruning
UChXNyp6dL_aY_3qwVgDd-EQ	Dr. Fernando Lemos
UCDoPuIvx88nh69fS5VJCNWg	Ciencia de Verdade
UCx7HKmnCIIbRBF2FjAoV0bg	Débora Aladim
UC6nYtmaMh43WUQW5YeopuNg	Eu você e nós
UCQq1CfzTvBRn3l4CYswnMcw	Juliana Inventa Moda
UCTFCMkTZPwi_PjerXYxDscA	Sweet Carol
UCjrmFzNfoXO-We5rT6jB4vg	Andréia Camargo
UCXTI4ER3d0UPT4WxFYI082w	Jane-Six Psicologia Social
UCT3P3oWIt21UsHi_wwDG8Yg	Débora Moreira
UCJS-Vcf3aR_vEX5F7oPIqnA	Nei Rodrigues
UCA6Roeo-qFVk3jvjAdag7Uw	Cocoricó
UCPaL0Om2geEJyjncqTGm49A	Tiago e Gabi
UC5lg8zKcnJ1rnxR6lPgD1ug	TVI
UCtzbjh-OJFkaHqSjvWJs87g	Inferno Astral
UCxbqmMsXory_zC-kNqKHUgw	Jornal da Alterosa
UCoC9FjH7GgWoPIYfr8sEJdQ	CEAR UEG
UClbjlUoxxs-Lc7V7tNVa8CQ	Assistência Farmacêutica Avançada
UCTrx5uG9vJjTLloAH8hE-pg	Macetes de Mãe
UC2visps0yULA5lnn5Yjne9w	Viajante Independente
UCVVIVc6DfU8uWJ60vk8iKpQ	Superinteressante
UCw8ZXVXrAyNTdvzKH6HMhmg	USP Talks
UChFIPDFYjTFg03eWlwmQcTA	Telessaúde ES
UC-6_6nA-v9W057U5sX3tTXg	Apure Guria!
UCdRdaVD3_JxbG7R4c9tembQ	Inteliogia
UCamgdcs45ToPrIV7wmT7iYg	afpbr
UCWeDz9iYFe7APda1DFMHLtw	Toque Materno Vlogs
UCxm7PwK74oVJtyP0vN2qQIw	Multimídia Produções
UCNX-i6w11LltMBn66PacOfQ	Podcast 2.1
UCxjXoEYzVFwvKD53-gvxhYQ	Reumato TV
UCmOqIaUBwlSK6lVGC2o46JA	Eu Ciência
UCfRVh-QaAzJ45hmNmlwT32g	Meio norte
UCoB_4Ec1pWpcf9mhyPfyvlw	Alessandro dutra do nascimento
UC2pQFYIrk5mg9x-LRM9TzYw	Super Spectro
UCtEEov46xWiYPdcJg-frWtg	Irmãos Mach’s
UCUw7hCgpimep4N_oEmG7G4g	MICHELSON BORGES
UCV5oxb6HtQR-ZptUGtnoPZA	SBT Nova Mutum
UCOFMoDHG-vKXs-f5vcG7JaQ	TV Clube PE
UCXQHQFA87heyfElr-XajQPg	Net Didata
UCjFAEaZfULixCSOCIvY9qNw	MMarchadorTV
UC1r7Gt4v-OD8domIE0Vw2Zg	Papo de Pai
UC5ACo310tjp353abzLc6sVQ	Felippe Vanessa
UCJl_ERzQBci1wgg3UdM1bVQ	Falando de Autismo com Ana Paula Müller
UCoi5cG7JL_kZ-LGW6-PtZ_w	Meu Anjo Azul
UC8p1vwvWtl6T73JiExfWs1g	CBS News
UCJglPPxxQQtFg-78dIkRqNg	VINICIUS FLEX 10
UC4p7d_1KehpvAb7_9-WlkdA	TV UFMS
UCsPBsWBocgY1BxKS0FVca0g	Sabin Medicina Diagnostica
UC1Nm7gQCcGvgLyVcGTXp-Ww	DOUTOR AJUDA
UC1M8HoHfvAfBpNnkGoMxX1w	Manual Do Paciente
UCqGCcfns6j4zlcAODLOeMDg	VEM com a MÃE!
UCL0sWgefmtjUNvtBafXQmhA	Jéssica Gomes
UCNa5CND4GBCDxwHFB51EAbw	Jaciara Petry
UCegeG7JEKeXThmcZ8BjtvsQ	Unimed Londrina
UCpvhFBKf_dacTd8NFRgcTxQ	Priscila Faria
UCcRcXycIYgXJcxiur0pzLPg	Jessica Sousa
UC1xM1iuftFCqlZO-omXZesg	canal meu jeito de ser mãe
UCIWKfj-9SxZetO6DVzDIlww	Anna Krystina
UCAAqC3FgQfWxu_ui-1gynzQ	Brazil Heath
UCwHCkGOaMvG2kz7b-jhi2qA	unespvideos
UC_gV70G_Y51LTa3qhu8KiEA	LUCCAS NETO - LUCCAS TOON
UCLgti7NuK0RuW9wty-fxPjQ	TV Senado
UCa-AC7YhCP5u5yO5aNjKjoA	Ministério Zoe Vida de Deus
UCcs0knrjjReJHuF5lsBBbiw	Igreja Santidade e Arrependimento
UCB9iWAdLYM9GzeKOaOBYH2Q	Boi Saúde
UCGbDaS58FGh45Oq4N-Qfhdw	Dr. Marco Menelau
UCnQeN_JtknE5o6NHZeOMpXQ	Fashion Dog Italia
UCL3HlT99aQ1004ojA7u6ETQ	Sottosopra
UCwfEOn0O1DWcyTgzVVu28ig	Marília Mendonça
UCQ1LWE9p0i3HxIpDZjiOKjg	Emilly Loise
UCN_Yp-5LABpTC1qLls2PXAA	La Chimica per Tutti!
UCYSslASzgHQ_F_vuTsmmi-g	Cura pela Natureza - As melhores dicas de saúde!
UCr-BdJEeyDNlPodHF1pUKOg	Só Dicas Naturais
UC9z9JemVpHB7BJtXjESAsOw	MELHORES CENAS DO CINEMA
UC5KkuUqkQBF8yD3xqbLMigA	Aponta Vídeos
UCO3YT7cu0cxd8gSQ6nCf0qg	ISTO É INTERESSANTE
UCf4kyk1iMd03noNbDU2nNOg	Remédios Caseiros Marcia
UCvm2Fxo8EavRB59AVNF7F2g	La Verità sui Vaccini
UCCSQ6Dq4FDyN6rgWCt_uurQ	Fondazione Umberto Veronesi Channel
UCOjnB2Ul08J7jM9npAvo6EA	DECO PROTESTE
UCEdgNBcBybRtwv836C8El4g	Arata Academy
UCaNOyWyEVojnz4AolKeDFFA	Mercenarios
UC74icFVsxTFr2BW3Vm8n_iw	Gran Cursos Online - Concursos Públicos
UCOwuzVSWrrAdRIviGN7-T5g	Governo do Brasil
UCBL2tfrwhEhX52Dze_aO3zA	UNIVESP
UCJXAScTUxxfPzwLzZc3VUHA	Canal ProjetoX
UCysFgzeqkdh4FU3g3jUvCbw	Liliana Delfino
UC-TJtIntyZTj34lwLdSo2xQ	UACH
UCo8W6UskksVPEfNj09a9dMA	ThePetroWorld
UCqLpSeS-N7XDLkyta9QjHbw	Planeta de Livros Brasil
UCqnZW-G3y8afNMyYb821u6g	Saber a Lei
UC3MmhFxndlz10oOgXvuvLPQ	Dra. Carla Frohmuller
UCw3HLkyWjI3tD1RQTGEe8LA	Pedro Cunha
UCijEMORybIdM0CWLJaHjQGA	Brunna Cristina
UCCq8mh725qRQn8g2_PvibpA	Carol Lima
UCzp_5fGv8jy8uf_Jl46nR2A	Marlithon Oliveira
UCJwqS9dQlV62tpNkqbNTZ8g	Clínica Higashi
UCcFgREmujdPHvA7I_VOmgIA	Área Secreta
UC876uazcW8p7wdl3JdbVIaA	Primata Falante
UC-qeHsCIc4DiYhmPq7cmLkQ	O Curioso
UCaJqv_9-pPiWRCI33WQD9ZA	Detox e Saúde
UCSfmJw5USzP6Ca-uGPPsNRA	Portal Saúde Mais
UCnH3v7ENZKWTqATMGdpKxBQ	Canal do Pava
UC0bD2v2yi9WoiupiOMV951Q	HUMANÆ LIBERTAS
UCIFYUiFUWCQzDc9nc6KY2Ig	FOGO VIVO de YAUH יהוה
UCIsrnGY0LfR4OT_PkfzAIJA	E Se For VERDADE?
UCQET9CZdh03jWnpY7WY25EA	Mundo ESPN
UCtvvTFp0XANyllOdmzZr9VQ	Casa do Saber
UCOJNw9aHGRkYuIOqwU7yK-Q	Mundo Sem Fim
UCpLR-q8rFLe_rEAXf4PRxRg	Daniel Lopez
UCJVTsYjG0KLNWL6OyHx7ZGw	Nexo Jornal
UC0NtqwtL1oLxwm3lx_Uo5Og	Politize!
UCOO3a8hkldq6zGAOxgvZndw	Nightmare
UC52YPxBsiE7Xcf_53WYXvTQ	Gol Contra
UCzjtGnD7qqeaHW3nvDVrjQA	Os Pingos nos Is
UCRuy5PigeeBuecKnwqhM4yg	TV 247
UCI4mls1kw1nChubkbVeRLKw	Lions Clubs International
UCg7yfJ8e1TRqyA1tSkALyzg	Professor de Atualidades
UCOzxzEu70fNClG-9nNi4Yzw	CRISTALVOX
UCVqNUy4-FTLMwMKX-krfB6A	Marco Antonio Villa
UCllbSdCRAEsPGa4JpJuLZHg	fboyt
UCjSgG4M0KM0jDBgkjwFVrjg	1x0 Feminino
UCnZOYk5co0M7hA5z1ML_45g	José Nêumanne Pinto
UChkPByjtZumJrJmtqkiw5Jg	Ceticismo.net
UCxy9I7D4Q8VSx1wunLsntOQ	Paradigma da Matrix
UCKfap1xgEqqAhN7jtYgDsYg	Paulo Almeida
UCAGWqQrxEF0Jb35zDnNaLgg	resistencianom
UCjnw-Wmtd7O89zlFSh1O2SA	Filipe Martins
UCdsgzVdqZ9Muii2OpR3t_ww	Toni Dozane Oficial
UC9npsqVPOTyKQK8TiVDAe2Q	Americo Moura Resumindo Tudo
UCDfwywWnYoB7sHPV5udsj0g	Ju Almeida Pet
UCJ4uxK_mo6gNoqk9cyvgWkw	TV Correio
UC8QNlbRIeKQsbG8u_qIzowQ	Eludicar Centro Pediátrico
UCEA5mVrH3jPMmuah5qD0DUA	Dra Monica Valverde Viana
UCtgFbv9VEh7IOw3vxMAP43A	GINECO SINCERO
UC2P4D6uHis-ENplUEPyK4tA	Sinal Verde Caxias
UCJZOLak0v_pR6AjYsbyAoog	Canal do Mau Hálito
UCsRfBAspa72ExrsN347W2xg	SBT Rio
UCWdXgfpEIZIGzah9_yCL-Xw	Saber Filosófico
UCsdIGtyuyiW--cidQQ6KUsw	Record TV Goiás
UCyCZb-wsvM_VFKSbyKftgHg	Conhecimento Bigode
UCqTxFR0G0ulWso4ZP8z3IJA	Balanço Geral MG
UCQGAqLdIBfVSB5qzTtT-Urg	Juruá Online
UCU8Y4bqcr0unUI18EcVmo4Q	TVM
UCwQdXKdraEfNZv9b4IWFn5g	DESPERTE. - Thiago Lima -
UCPHXtAKuUXPOwdEUzMgSD0A	verdadeoculta
UCjn8lktJ0qykReZ_FsPxH8w	Natural- Dicas Caseiras
UCW3l9WndLOjhRtsg0Aa--2g	DoutorMoises
UC8QAdpiEWAOg3AOCCFDCOYw	MBL - Movimento Brasil Livre
UCSBSGWNP1RK74Wh7XYex_Gw	Peruvian Mav
UCBMKrkHv07GoYb5ITLt0sYQ	Filósofo Paulo Ghiraldelli
UCC6f63SXY0CDpsPGDBtTWVg	Henry Bugalho
UCEsbaUdrM_87K-2um30hf8Q	Jovem Pan - 3 em 1
UC9sV0ieuVY2_K4LucZf4yow	LiloVLOG
UCqAjL4g0-FJ4-aocsfQZkZg	Daniel Mota
UCVUF80k8eY8T5-18TPL9xDA	Cátia Santos
UCyyD0uZzrvjF4GKsmFBuUOg	Tony Devito
UC3gQ9lIiPQj7frT5CE5QyRA	Samuel Borelli
UC2m7CnTMT-AMH5w2IgBURnA	Italo Goulart
UC96qopSyu7Ga75jW3HEO88w	Aquias Santarem - CRITICA BRASIL
UC9HT4JrbO6TSfjDHTzFgbPQ	ENZUH
UCV2kagEmsbrO5lc6glH-8jA	Diário do Centro do Mundo
UCYmHuI1yrP_pkSsJlQRCi1g	Libertarianismo
UC-l4Sv-gy98g_NBasXEEcGg	MrRone43
UC5nLISkLI9zsaMHp4YBYTFw	Psycho Mantis
UC5z5hsnZOZJH8vFacP-9poQ	VideoSaúde Distribuidora da Fiocruz
UCCdnN4v9Fia0pjUzYlUBsGg	The Children s Hospital of Philadelphia
UCGo3vjM2Ll3XujL-zYT5SMg	Ponto em Comum
UCWoe_w-oadmQxcXZV2KMZgg	LordanARTS
UCKsGFyhL7_fDCEYN5jDYhew	RAETV
UCHbGJ36_GFxqzZbWxqAn0zQ	Hope In Jesus
UCKFKv33ofAtflmz0C-TKnQA	Em Busca da Verdade
UCxG1mll0wS-Q_ZvQ8rJuqag	AKEL ESCOLA de Jesus Cristo & Universidade EX
UC9coa4eWvwznczn6P-RXLwQ	Joy Arthur
UCbHRDtYcy75lsoRdZ2h_24A	WJBF
UCHvDONQK4hL1_7sgIMg0iPQ	ConvergenceScienceNetwork
UCm17GAihi4NAVEnA1n4WajQ	UNINOVE
UCh897BiM_CQJtK2gL29tYSg	clica que é dica
UCi0ftpk_k9UhC2oNrnxatNA	Band Amazonas
UC-wcdrzucnlKGBjyEUaEWaQ	Morning Show
UCqvGEQ2q-gScRQpl158SAfQ	MEDICINA COMPLETA
UCsGzj2UYih1rr91iuFVPKiQ	Blog Experiências de um Técnico de Enfermagem
UCooHPZW1y9nswIiZuA0EORw	Naturais - Cura Natural
UCdWWan__ZRGzfVZ81nfE3KA	Conseils de famille
UCcyrEfqNzo1AWnC_PPA4rzw	Daniel Mastral
UCol52xtoFqjdeW2t-JvLkeQ	prosperidadeshop
UCfMqB9cB9RfC1r2CMPnYDNw	Palestrante Tiago Rocha
UCB64lmy3pK38sjYIVjiZN8A	Cizio Oliveira
UCQKBmUf2GZUXRQFpzCPN5og	SP no Ar
UCQNi2fXhCHRu8-b-w29SMCA	nutrição Alimentos & Cia
UCgrLZ1vLKak20iMSxK13C9w	Tati Braga
UCrSYAKKH6gYD04KA-0ZkLAQ	Isabela Soares
UCeYMquYSGFQ6ryJQ1QWxn6w	Markingguitar
UCLJM5tW9y0KpbKo-F7-kGEQ	Argumentos Veganos
UChsb03kH_dNRh2-wE8GkeaA	Mundo Desconhecido
UCIirjo8OWJBMLfV_peBD6RQ	AssombradO.com.br
UCilO3ZOPdzgmccJg_NpJ5XA	Kenya Diehl
UCBrf8ddDbkt70nWkJHlc42A	Leila Maria Felix
UCfwxLOjkmp3gSEB2KCYhOlw	ESSENCIA AYAM EU SOU Espiritualidade
UC3d7Ix6GrtxESULE5Auj_Zg	Câmeras Escondidas Programa Silvio Santos
UCEWOoncsrmirqnFqxer9lmA	The Noite com Danilo Gentili
UCmgTRw8XEjRmm6VdvkIvk2Q	Joyce Aurora
UCmQTY7b5w61WlmBbJ5a8XrQ	Rede TVT
UC3naP3CuNBhxvRVohkUTVhA	Day Ramos
UCVZGAO0Sit9EJrV6tbbIAPw	Um bilhete por favor.
UC9dBF5Mxf5pMAc7fXdEi8AQ	Canal da Resistência - Paulo Pimenta
UC5VvsTwsyKWMZSQtt1MPCEw	Ana Beatriz Barbosa Silva
UCUUU5zBnxg55vaXymuFJDPw	UnBTV
UCSceTdZl4Bq6YFR4sPR5_gw	Pianeta Mamma
UC1ToYrGtIHCpTA1FtJ-x0Lw	Luis Andrade
UCbFACr0PqttswP_W9heOPJg	Bruna Caixeiro
UCsTmTlgq1FsoVhp-_I76Yqw	En Familia con Liz
UCmn8oX1V_E14jsR4KXIbeSQ	Mindalia Televisión
UCXV8HmDQt2akopxAQQt3oeg	LA CAJA DE PANDORA
UCC1sHLVCWUBP4qmaZ8WqPzg	Bianca Santoro
UC-er6TPk2_XAfbSz-mPs3-A	Congresso de Autismo
UCxJ8B-O6H2ottFrNKW-fgZA	Roberto Andersen
UCnPjkkDT0uVuaxXfhyhkR3g	Nathan Vidal
UC5zdbrXhirdxV5blrkwe-QA	EU SOU
UCl3pbBstPZJNgLtFX4VzCwA	TDAH Descomplicado
UCp9JGvD4ptySnE0TJAK1FrQ	Dr. Augusto
UC2ysTeeBjznIDRKaRs6yyHQ	Katia Dolle S.L.
UC1iT5pP9zH8SYzpiEXK9I8g	Lukinha oliveira
UClXJT92i1vBvC51l00685CQ	Décio Simão
UCquOzSBI-inhOTBgz-glU0w	Dicas Naturais Online
UCT2iDke9SuPfp0XO0rr8YSA	Caio Fábio
UClmKoaOV0xdb_2HgKNmo5nA	Carol Santina
UCInWfLSA0oXG60F5O2HnGEQ	Lances 2.0
UC0f866RMRdL5mSVnipiOHxg	Canal GNT
UC9U4nIDyIzzelXrjNQXNvxA	Pânico Jovem Pan
UCi5_KLjyGPF4u5htAkzI16g	João Jonas
UCRfPAk1AyQXr0VHVHFtaaag	Atenção Vascaínos!
UCuuKLWNMbOTV55j3Ujk18Zw	Educação Financeira - Cléber Miranda
UCRdhKdx8sCyx6KTwGmMb78g	assembleiarr
UCybVje4N7x7xY7Ia1OoxQAw	QUESTIONE-SE
UCRqfUpoyxKlDFZH3-PmehFg	Lívia Zaruty
UClkNOcpdzzVTEW-SY10-DrA	Alberto Dell Isola
UCUn9CBocrtIw6vNPYPGQ_5w	Curso Online Gratuito
UCVrx8gt9oAHPbOjA-EjFblw	MOV Show
UCRoiyPUpRJxPkVZYY1fHE1Q	Maestro Bogs
UCFyLC5lgheGX-aNl9GH1uqQ	Progressista
UCsQbqbLY-uvbXSCXinr5imA	Grupo NotreDame Intermédica
UC4aOaBcNPsZlSREx0p71jeA	Cinemátika Filmes - Produtora de Vídeo
UCZ9d2hCxMtceleJez4pJMNA	Portal Ternura
UCLpvqh2xTNg7Ewn2HyiMjxQ	Simples Assim
UCABvMeFftxjprbpcl3bNimw	luciana brito
UCUFDVVI3J0ZXtSmF9yL50xg	Mundo de Mariana
UCtHcnXKvUqXSLQ_B1U9zpBQ	Vício Feminino
UCdd1PhFKkX96UUr8KmK1DhA	Record TV Paulista
UCCIQoWSB2N80fU7x5ga3Biw	Dr. Marcello Pedreira
UCbrwFkBkzcT9UmskS7g8vdA	Vivacin Clínica de Vacinas
UCrJ_9o1YxOZiSqTCgKXApEQ	Cuide se Familia
UCKPIuWx4Eo-WXTMJfHV8zeA	Músicas Clássicas
UCu4XcDBdnZkV6-5z2f16M0g	Real Stories
UCE3LimIhZcbjJJ7g8KA3PVg	Jacson Marçal
UC1pEecEFODR1WZtH5w0ZTpw	Attitude
UChDKyKQ59fYz3JO2fl0Z6sg	TODAY
UC8Uj2P4_Zya4x4Oghx3afRg	InstitutoVerea
UCKfjBrg8BNO-FgRRnAw3D1g	See And Do Kids
UC8KpMaUwtS1nEkyCAzmojHQ	Anny e Eu Family
UC8fQzKHIhSoZeSq3bwQx4mw	Mayo Clinic
UCbah7H3RLT4yWwkTd3gsCFQ	Giovanna Maira
UCqbgV7oxe7H6t4_xiDnXfIw	Paulina Naslonski
UCCh7IUDKaRNmmbsDheYiLrQ	Alex Sousa
UCIeG8B36iRu6S7EZh8EFyyA	ITV BRASIL 50.1
UCsK-uQfZEgyRL9eCHUdYQKQ	Gamalolftbr
UCAQrR3MfrinvEviHRt5qzJA	VaxXed StoriesChannel #VaxXed #VaxXedStories
UC-aa1wREP4i9XRA5_rqed0A	conde loppeux
UCkAbeyJZqp6JFYfKy-98NjA	Integrando Conhecimento
UCSTlOTcyUmzvhQi6F8lFi5w	Atila Iamarino
UC8kDe2c78xdmZ2YwPy9h-4A	Fatos Surpreendentes
UCBpwS_TPjdLt_FLgl0ZtZAg	TV EVANGELIZAR
UCKoXJUb5JUVyejefUckrOqA	Revista ÉPOCA
UCDo7hEeMTMHLJxRu5fnbXKg	TV ALFENAS
UCOqJ7A31bYTQ631pOyHQbSw	Sou 60
UCh3wFqG58kJMTT_2jYBPN_w	EpidemioChannel Br
UCqcgQALJgSopINSo4ojtUBw	CanalFIPMoc
UCK6QegB9LU1tIsslcT6KVAA	Aprendi com o Papai
UCz8po9AOG6nAZthb5wkcA5Q	Daiane Nascimento dos Santos
UCFiFWF2iO_oNhPywupD_4Uw	Lucas Meira
UCAVq36KDhPluroMCL1BZhbg	Painel WW
UC0Uzow4iFA8PoIKE_U2rmeg	Televisão Atalaia
UCubxEhRi56_V4_eTzzcFwkA	REDE BRASIL OFICIAL
UCSNQJKbyfyDIKbov3uh-tkA	Altas Dicas
UCvs0YgDMR5lKC_XJglx0f-A	Paulo Cavalcanti
UC1Dz3vC3vthE-nZq0ZyCF4g	CONEXÃO 92
UC88EfXGkc_98Q8XoZ8k9j7g	Flavia Martins
UCPsFqRodwOk0esir1I2qaqQ	Kuadro Oficial
UCun1gF57-Kv35uXZQ6Bn78A	Revista da Cidade
UC5BKM57hcPBdRuH6bbTkYJw	academiadeciencia
UCojMGwjEcjMzwKzscrcfQog	Abri - Associação Brasileira de Imunodeficiência
UCgyeJxD05YnoDquRMNBfBqw	PBS
UC6ZFN9Tx6xh-skXCuRHCDpQ	PBS NewsHour
UCd4NL_O554LRhmz4utcGYBg	Muita calma nessa Obra
UCh4syoTtvmYlDMeMnwS5dmA	80s Comics
UCOeb7hXfWgeCLEgM-7fmwhQ	Villa Music
UC3K701GE5SdbCQwR_3r8jzQ	Tira o lenço e vai ser feliz
UCjIPRjJZtGhzWD2LrEKOHMA	Matemática Rio com Prof. Rafael Procopio
UCy14ALftdLPFvTgZ8HoW3JA	Poli Prévias
UCObLld43EhuoGxJZCadLKpQ	MEDICINA QUANTICA DR DAVI RODRIGUES
UC7xks0e9MwoZbisBIZfgOww	Medicina Uniube 22
UCzzQnR2e5VIgziK3SiJ6uIg	Watchman Reports
UCEEdi5XBbidJ5fThh-RKdnQ	Registered Nurses Association of Ontario
UCstv_dyLeuAbDB8ISTfkFbQ	A farmácia de Deus com Lisa Santos
UCqida351Ab3xKJgIbwWtjeQ	Manpreet Saini
UCcf_-DBdNgyZoK4OYGbgmfg	Jéssica Beatriz Costa
UCf-5A0NhBAc951Fnpg8fJcg	Jujuba Autismo
UCv_d2jfwfd1qj3VuF_jOAEw	PIN Progresso Infantil
UCPSF_i4TthY5-7XMnLjh2jQ	NeurologiaePsiquiatria TV
UCdWq6NIL_jKyLEBNBT_w8vw	Zorg·nu
UCcw1Aw5GCxc8dIkssjKvRBg	Como nascem os pais
UCD8dqcY0XiLBA1Z4NalNqdw	AGRO NORTE
UCGCZAYq5Xxojl_tSXcVJhiQ	ANNnewsCH
UCYq0FWUvxm5mQAu33kIoqDw	Mente Autism
UCfUkLCazuGSyGp5lopQdytA	Dr.José Netto - Otorrino
UCpmlqG2aLA1UwdCYTJY-Mzw	Instituto Colombiano de Neurofeedback
UCmp184bsu3urmbLyGbHJlYw	Pra Sempre Leandro e Leonardo
UCZrvYw-aW36ztpZcCZC-eoQ	Saúde da Mente
UC-fJ1bq30ZRdb4kM6aZt64g	TV Teen
UCBRc4S-bD40HD9kv2XLW7yg	Thamara Pricila Olioveira
UCRJQw-oofyAgFv3JlnIAxZQ	guiainfantil
UCV32l4Xk6vXOemE60pZ41Sg	Secretaria Municipal da Saúde de São Paulo
UCzGmaC039FOPY8oHRAEqGvw	Neurocyt
UC7TPDB18dXnlv0C4zzYsS3Q	HealthRanger7
UCiEkAcqLrULGkv2TcnsvL_A	verdade oculta
UCZ18OYPiEd-m_IyltxdITxQ	Irene Passos Santos
UCedt33latJW7StRfdF4-1FQ	BOA VONTADE
UCDmPh4In2CrcuFI-e-hD9nA	Estudar Mais Biologia com Prof. Jonatas Fontinele
UCOTX5HwSR_EWuOY0OMDiAig	Sr. & Sra. Montino
UCzNDWqT0AuqQx188JGV5Taw	Paulo Almeida
UCwHG6bZ-zd9tffVc4QwtOoA	Tv3Fronteiras
UC62VmJ_dnZHvSboIRn9Zc9Q	Santiago de la Rosa
UC6UHPM2GGZxn2L8-EkJCR7Q	Iva Maria
UCIy00Leb2ZETBw9_U0Yg7fg	Rafael M
UCRLKi_9gQNthwlKi70qi54g	Dr. Alain Dutra
UCpZO2Fi6cd_PXZNH0yeGjSw	Canal da Saúde
UCQsJ3UMMUwo_xCW4z5ba_EA	Hospital e Maternidade Santa Joana
UCyF-Ubm2ALNTtSiYdG-Ezqg	Victor Sorrentino
UCmvavXl7cZAx-qXoDrmEqvw	TV Chris Flores
UCkYT8YPzCP0bGJkO6RBeRuA	Carlos Iafelice Junior
UCVxo-mC-IbvtfWgFld84kpg	DJNenoMIX Brasil
UCIR_frYnXbvJnkSycoqM62g	Dr. Vitor Azzini
UCHGEEhJYJMgWRw7UPYlqxmQ	Saúde Curiosa
UCQTOPLEFah0hBCB7dmaoPtw	Prof. Dr. José de Felippe Jr.
UCYoxYA3waaqzJhO_exqCQnw	Lívia Sturnik
UCj0_I61NA_sCFI2JW4QdOCQ	Rafael Guerra
UC5GmNYE1nCfITp9xpyBY7ng	Apliquim Brasil Recicle
UCqikGdV6Uh1YW800PkmcmpA	MEDPRIMUS
UCptYdjTFCDVdkU5nbLmylcQ	Degivaldo Bezerra
UCLr31O2rNob_pzh1UnPcNOg	Ana Paula Palagar
edgedef>node1 VARCHAR	node2 VARCHAR	weight INT	directed BOOLEAN
UCHyeOQ0-Td0Dv3xfI0dwu3g	UCP391YRAjSOdM_bwievgaZA	1	true
UCHyeOQ0-Td0Dv3xfI0dwu3g	UCHyeOQ0-Td0Dv3xfI0dwu3g	25	true
UCHyeOQ0-Td0Dv3xfI0dwu3g	UC9zqTTVeClpqMQ5CLuJdWtw	3	true
UCHyeOQ0-Td0Dv3xfI0dwu3g	UCuAaB8lLRmoZzOrc_d_Ka0A	1	true
UCHyeOQ0-Td0Dv3xfI0dwu3g	UCdKJlY5eAoSumIlcOcYxIGg	1	true
UCHyeOQ0-Td0Dv3xfI0dwu3g	UCyoGb3SMlTlB8CLGVH4c8Rw	1	true
UCHyeOQ0-Td0Dv3xfI0dwu3g	UCXj2oSzwg6G0iBjKg33joMQ	1	true
UCHyeOQ0-Td0Dv3xfI0dwu3g	UC0LDNBjI8prPXedEj3QosOQ	1	true
UCHyeOQ0-Td0Dv3xfI0dwu3g	UCk0U1Js-um2lRjSF3VoS_3A	1	true
UCHyeOQ0-Td0Dv3xfI0dwu3g	UCN-opsqqDunWO6h5uCp9Y4g	1	true
UCHyeOQ0-Td0Dv3xfI0dwu3g	UCG-eghyORxNrzSG8FkAWKyw	1	true
UCHyeOQ0-Td0Dv3xfI0dwu3g	UCcoPc-BqFPkVkkwyS35J-ng	1	true
UCHyeOQ0-Td0Dv3xfI0dwu3g	UCPR3gVNYBzi-02_O4noC1Zg	1	true
UCHyeOQ0-Td0Dv3xfI0dwu3g	UCGfBE94turq_hyKMxB-Dfrg	1	true
UCHyeOQ0-Td0Dv3xfI0dwu3g	UCH2VZQBLFTOp6I_qgnBJCuQ	1	true
UCHyeOQ0-Td0Dv3xfI0dwu3g	UC12zKGLhMhDeDidoctM6BrA	1	true
UCHyeOQ0-Td0Dv3xfI0dwu3g	UC3PLVO-mt6ZQLiySKdJedCA	1	true
UCHyeOQ0-Td0Dv3xfI0dwu3g	UCF8Uaj9cnSkL-63NSPnBVCQ	1	true
UCHyeOQ0-Td0Dv3xfI0dwu3g	UC3Ooj_iDWELBumIEDejyNHQ	1	true
UCHyeOQ0-Td0Dv3xfI0dwu3g	UCz1xVDltULzUhZCJ1TkvnTQ	1	true
UCHyeOQ0-Td0Dv3xfI0dwu3g	UCe1XNXkGImWSq5n4wkzNjBw	4	true
UCHyeOQ0-Td0Dv3xfI0dwu3g	UC9GFu08xsidnYq_qiJlTcug	1	true
UCHyeOQ0-Td0Dv3xfI0dwu3g	UC9fxSdFjcz5QWDEhYCk_k1w	1	true
UCHyeOQ0-Td0Dv3xfI0dwu3g	UCwQhAc44SfDvhdCQiHluBVQ	1	true
UCHyeOQ0-Td0Dv3xfI0dwu3g	UCWq1xltHB2fDe6YkYoOrryg	2	true
UCHyeOQ0-Td0Dv3xfI0dwu3g	UCVPdtCCsEsem4hyVwS_GzOQ	2	true
UCHyeOQ0-Td0Dv3xfI0dwu3g	UCuqsl-IppoFW0uNPQfbXAVg	1	true
UCHyeOQ0-Td0Dv3xfI0dwu3g	UC4F32QLrpDmmRrozxr9z59g	2	true
UCHyeOQ0-Td0Dv3xfI0dwu3g	UCv3JgOy__M8B3xsa5adWR6g	1	true
UCuAaB8lLRmoZzOrc_d_Ka0A	UCuAaB8lLRmoZzOrc_d_Ka0A	126	true
UCuAaB8lLRmoZzOrc_d_Ka0A	UC9zqTTVeClpqMQ5CLuJdWtw	8	true
UCuAaB8lLRmoZzOrc_d_Ka0A	UCG-eghyORxNrzSG8FkAWKyw	3	true
UCuAaB8lLRmoZzOrc_d_Ka0A	UCP-Vg2PcmLiWpEdvMI1R35w	1	true
UCuAaB8lLRmoZzOrc_d_Ka0A	UCE0KRm8m9_ki8MrMYGyjpAw	1	true
UCuAaB8lLRmoZzOrc_d_Ka0A	UCXj2oSzwg6G0iBjKg33joMQ	2	true
UCuAaB8lLRmoZzOrc_d_Ka0A	UCHyeOQ0-Td0Dv3xfI0dwu3g	3	true
UCuAaB8lLRmoZzOrc_d_Ka0A	UCxt_nr6Xwbq4O2Ur9ZBpgAA	1	true
UCuAaB8lLRmoZzOrc_d_Ka0A	UCykUsChWx0cy2ZRn3r0s5qQ	2	true
UCuAaB8lLRmoZzOrc_d_Ka0A	UCPR3gVNYBzi-02_O4noC1Zg	2	true
UCuAaB8lLRmoZzOrc_d_Ka0A	UCFbx6QBTcDI6toOnO-EyajQ	14	true
UCuAaB8lLRmoZzOrc_d_Ka0A	UCH2VZQBLFTOp6I_qgnBJCuQ	2	true
UCuAaB8lLRmoZzOrc_d_Ka0A	UCR9EXU15wObpFMDyQmHXeuw	1	true
UCuAaB8lLRmoZzOrc_d_Ka0A	UCGfBE94turq_hyKMxB-Dfrg	1	true
UCuAaB8lLRmoZzOrc_d_Ka0A	UCrSM1UV_KLAdTzgxyxl3POw	1	true
UCuAaB8lLRmoZzOrc_d_Ka0A	UC0LDNBjI8prPXedEj3QosOQ	1	true
UCuAaB8lLRmoZzOrc_d_Ka0A	UCyjo9Vr-Okmq7OHYyEQHGTQ	1	true
UCuAaB8lLRmoZzOrc_d_Ka0A	UC3Ooj_iDWELBumIEDejyNHQ	2	true
UCuAaB8lLRmoZzOrc_d_Ka0A	UC4_WOkaSB6TMFad-v0T6qmg	4	true
UCuAaB8lLRmoZzOrc_d_Ka0A	UC7m35AnSXe8aSsBWRCPEQ1g	1	true
UCuAaB8lLRmoZzOrc_d_Ka0A	UCXogxn8ApsdqeXyIDvBWOzg	1	true
UCuAaB8lLRmoZzOrc_d_Ka0A	UCPGGSQfN8LREy6dWdk85fpw	4	true
UCuAaB8lLRmoZzOrc_d_Ka0A	UC2mdv67uDPQO35IYkzK_Xzw	1	true
UCuAaB8lLRmoZzOrc_d_Ka0A	UC5ZXYxeWlROKbL7JziJ0bIQ	2	true
UCuAaB8lLRmoZzOrc_d_Ka0A	UC9fxSdFjcz5QWDEhYCk_k1w	1	true
UCuAaB8lLRmoZzOrc_d_Ka0A	UCWq1xltHB2fDe6YkYoOrryg	3	true
UCuAaB8lLRmoZzOrc_d_Ka0A	UCvLNnnIZdqXYqAS-l8FLJFw	2	true
UCuAaB8lLRmoZzOrc_d_Ka0A	UCquENngBYGYpHYtN0OVYLKQ	1	true
UCuAaB8lLRmoZzOrc_d_Ka0A	UCvsvFTlOWSFU_RBinLDU7Ow	1	true
UCuAaB8lLRmoZzOrc_d_Ka0A	UCrtNrQTDykcrtfYMkggmV5g	2	true
UC9zqTTVeClpqMQ5CLuJdWtw	UCthbIFAxbXTTQEC7EcQvP1Q	7	true
UC9zqTTVeClpqMQ5CLuJdWtw	UCKHhA5hN2UohhFDfNXB_cvQ	12	true
UC9zqTTVeClpqMQ5CLuJdWtw	UC9zqTTVeClpqMQ5CLuJdWtw	237	true
UC9zqTTVeClpqMQ5CLuJdWtw	UCgbbjw8zPkrmmL_XU1SgJBg	4	true
UC9zqTTVeClpqMQ5CLuJdWtw	UC12zKGLhMhDeDidoctM6BrA	15	true
UC9zqTTVeClpqMQ5CLuJdWtw	UC4zG6UeNUn-HM6UEFFkiESA	5	true
UC9zqTTVeClpqMQ5CLuJdWtw	UCsla1_l383BhIiki4Gj3d8w	1	true
UC9zqTTVeClpqMQ5CLuJdWtw	UCXj2oSzwg6G0iBjKg33joMQ	6	true
UC9zqTTVeClpqMQ5CLuJdWtw	UCG-eghyORxNrzSG8FkAWKyw	8	true
UC9zqTTVeClpqMQ5CLuJdWtw	UCA1nC2t2zfzBOySscmpIzGQ	4	true
UC9zqTTVeClpqMQ5CLuJdWtw	UCI2EhvTADDdOex2nBIRsigw	1	true
UC9zqTTVeClpqMQ5CLuJdWtw	UCH2VZQBLFTOp6I_qgnBJCuQ	4	true
UC9zqTTVeClpqMQ5CLuJdWtw	UCuAaB8lLRmoZzOrc_d_Ka0A	2	true
UC9zqTTVeClpqMQ5CLuJdWtw	UCqZN-NqgP7bhbctbyThSVUA	3	true
UC9zqTTVeClpqMQ5CLuJdWtw	UCxt_nr6Xwbq4O2Ur9ZBpgAA	3	true
UC9zqTTVeClpqMQ5CLuJdWtw	UCPR3gVNYBzi-02_O4noC1Zg	5	true
UC9zqTTVeClpqMQ5CLuJdWtw	UCDtVoSwSwQgwhcC89Nlz5Vg	4	true
UC9zqTTVeClpqMQ5CLuJdWtw	UChHd-MU2mOvZHmBQz6zJw_w	4	true
UC9zqTTVeClpqMQ5CLuJdWtw	UCxucJ9P3mLMneYypLZYn2uw	7	true
UC9zqTTVeClpqMQ5CLuJdWtw	UCUp-GSUuNxSZ7cxOg7ZnyqA	5	true
UC9zqTTVeClpqMQ5CLuJdWtw	UCIQPHl1WKKTt9KkWyo_JNig	4	true
UC9zqTTVeClpqMQ5CLuJdWtw	UC8IbAhPglJ1OeC44A_Gtmqg	6	true
UC9zqTTVeClpqMQ5CLuJdWtw	UCHyeOQ0-Td0Dv3xfI0dwu3g	2	true
UC9zqTTVeClpqMQ5CLuJdWtw	UCViYj9umcJZdjKITQrB1D5A	1	true
UC9zqTTVeClpqMQ5CLuJdWtw	UCVFbXI6Gu8U2f9Gjtxw4A-Q	11	true
UC9zqTTVeClpqMQ5CLuJdWtw	UC0LDNBjI8prPXedEj3QosOQ	4	true
UC9zqTTVeClpqMQ5CLuJdWtw	UC3Ooj_iDWELBumIEDejyNHQ	1	true
UC9zqTTVeClpqMQ5CLuJdWtw	UCsW2F43izuIFU58yq_anyDA	1	true
UC9zqTTVeClpqMQ5CLuJdWtw	UCquENngBYGYpHYtN0OVYLKQ	1	true
UC9zqTTVeClpqMQ5CLuJdWtw	UC4F32QLrpDmmRrozxr9z59g	16	true
UC9zqTTVeClpqMQ5CLuJdWtw	UCZ4pDPv5kdO_2Da5brOlOZQ	1	true
UC9zqTTVeClpqMQ5CLuJdWtw	UCwQhAc44SfDvhdCQiHluBVQ	4	true
UCN-opsqqDunWO6h5uCp9Y4g	UCN-opsqqDunWO6h5uCp9Y4g	53	true
UCN-opsqqDunWO6h5uCp9Y4g	UCDtVoSwSwQgwhcC89Nlz5Vg	6	true
UCN-opsqqDunWO6h5uCp9Y4g	UCP-Vg2PcmLiWpEdvMI1R35w	3	true
UCN-opsqqDunWO6h5uCp9Y4g	UCnwxA62CqAnW_z0n4WLbp6A	1	true
UCN-opsqqDunWO6h5uCp9Y4g	UCJMH8GNRXMjr2uGci28v9_g	2	true
UCN-opsqqDunWO6h5uCp9Y4g	UCy7oVBYY0FGXeeJpy6ITXxQ	2	true
UCN-opsqqDunWO6h5uCp9Y4g	UC4zG6UeNUn-HM6UEFFkiESA	4	true
UCN-opsqqDunWO6h5uCp9Y4g	UCDes47D0_xrzOm_r7b9RQAQ	1	true
UCN-opsqqDunWO6h5uCp9Y4g	UCIQPHl1WKKTt9KkWyo_JNig	2	true
UCN-opsqqDunWO6h5uCp9Y4g	UCORRcj9wv5DEYCEg2LhBcLQ	1	true
UCN-opsqqDunWO6h5uCp9Y4g	UC2mmP8ysfyko40KSn90x6Og	1	true
UCN-opsqqDunWO6h5uCp9Y4g	UCR2IONXExRWEGxREw7lXHCQ	2	true
UCN-opsqqDunWO6h5uCp9Y4g	UCD9kk0EUEtflrRl6TV0lDyA	1	true
UCN-opsqqDunWO6h5uCp9Y4g	UCNl_i-ggJbZNyOLlhE7yyhw	5	true
UCN-opsqqDunWO6h5uCp9Y4g	UC12zKGLhMhDeDidoctM6BrA	17	true
UCN-opsqqDunWO6h5uCp9Y4g	UCZmc8QllMtE-fr51p1niyjw	1	true
UCN-opsqqDunWO6h5uCp9Y4g	UC9zqTTVeClpqMQ5CLuJdWtw	18	true
UCN-opsqqDunWO6h5uCp9Y4g	UC8CYH-5VBNcMj9wta4W8cPw	1	true
UCN-opsqqDunWO6h5uCp9Y4g	UCQdOZmbeT9UoQy8G3zeNE-g	3	true
UCN-opsqqDunWO6h5uCp9Y4g	UCk9mgpQVdJ5oKQWkM1UPBaQ	3	true
UCN-opsqqDunWO6h5uCp9Y4g	UCV6Ue4o5UIeKQ3IEkjnXRlg	1	true
UCN-opsqqDunWO6h5uCp9Y4g	UCq8ChnGCYMVCzDgGMK9e91A	4	true
UCN-opsqqDunWO6h5uCp9Y4g	UCxucJ9P3mLMneYypLZYn2uw	9	true
UCN-opsqqDunWO6h5uCp9Y4g	UCyvhqROV3luJvtt2dLTFhAA	1	true
UCN-opsqqDunWO6h5uCp9Y4g	UCMYTIyqS1-7wT-3pBB8bR5A	6	true
UCN-opsqqDunWO6h5uCp9Y4g	UClu474HMt895mVxZdlIHXEA	2	true
UCN-opsqqDunWO6h5uCp9Y4g	UCOcG-EPdn2gsWVuMpF1TRVA	1	true
UCN-opsqqDunWO6h5uCp9Y4g	UCH2VZQBLFTOp6I_qgnBJCuQ	2	true
UCN-opsqqDunWO6h5uCp9Y4g	UC8IbAhPglJ1OeC44A_Gtmqg	3	true
UCN-opsqqDunWO6h5uCp9Y4g	UCT0ECF7TihWahDqpU2i9tQA	1	true
UCN-opsqqDunWO6h5uCp9Y4g	UCOQ_KwPhg3IZbigiK7NCnfQ	3	true
UCN-opsqqDunWO6h5uCp9Y4g	UC0nblCDJx75fBCDDqTCKHaQ	1	true
UCN-opsqqDunWO6h5uCp9Y4g	UCi2zMfox-UpFGAFfsMXqYfQ	2	true
UCN-opsqqDunWO6h5uCp9Y4g	UCVrKQMmA2ew9LFzeIDaOFgw	15	true
UCN-opsqqDunWO6h5uCp9Y4g	UCP391YRAjSOdM_bwievgaZA	12	true
UCN-opsqqDunWO6h5uCp9Y4g	UCgbbjw8zPkrmmL_XU1SgJBg	3	true
UCN-opsqqDunWO6h5uCp9Y4g	UC4JEf2ejgucNsmsFiEy0mSw	1	true
UCN-opsqqDunWO6h5uCp9Y4g	UCqZN-NqgP7bhbctbyThSVUA	2	true
UCN-opsqqDunWO6h5uCp9Y4g	UCyE4KeQg54Bx34LxQB22xkw	1	true
UCN-opsqqDunWO6h5uCp9Y4g	UCOS_wL35NuMn8qLASOQqfUQ	2	true
UCN-opsqqDunWO6h5uCp9Y4g	UCRlrE2ZyiPLyS61pgJCIoUA	1	true
UCSv9d0kQegylHWpP83jWSQg	UCSv9d0kQegylHWpP83jWSQg	278	true
UCSv9d0kQegylHWpP83jWSQg	UCL41BsrnhsSSXG4zYwqC95g	1	true
UCSv9d0kQegylHWpP83jWSQg	UCORRcj9wv5DEYCEg2LhBcLQ	1	true
UCSv9d0kQegylHWpP83jWSQg	UC9zqTTVeClpqMQ5CLuJdWtw	8	true
UCSv9d0kQegylHWpP83jWSQg	UCMYTIyqS1-7wT-3pBB8bR5A	5	true
UCSv9d0kQegylHWpP83jWSQg	UCDtVoSwSwQgwhcC89Nlz5Vg	4	true
UCSv9d0kQegylHWpP83jWSQg	UC12zKGLhMhDeDidoctM6BrA	10	true
UCSv9d0kQegylHWpP83jWSQg	UCcnuou4Sjm-qF87yzWve1ug	1	true
UCSv9d0kQegylHWpP83jWSQg	UCN-opsqqDunWO6h5uCp9Y4g	4	true
UCSv9d0kQegylHWpP83jWSQg	UCGfBE94turq_hyKMxB-Dfrg	3	true
UCSv9d0kQegylHWpP83jWSQg	UCNl_i-ggJbZNyOLlhE7yyhw	1	true
UCSv9d0kQegylHWpP83jWSQg	UCP391YRAjSOdM_bwievgaZA	1	true
UCSv9d0kQegylHWpP83jWSQg	UCqZN-NqgP7bhbctbyThSVUA	2	true
UCSv9d0kQegylHWpP83jWSQg	UCKtJs_zI1yzswHDWqkqHtWw	2	true
UCSv9d0kQegylHWpP83jWSQg	UClu474HMt895mVxZdlIHXEA	1	true
UCSv9d0kQegylHWpP83jWSQg	UC9gmqJKNBOyCl2KLdJIv0mQ	1	true
UCSv9d0kQegylHWpP83jWSQg	UCUtDAMp91VCfHTZ9_ypKRPA	1	true
UCSv9d0kQegylHWpP83jWSQg	UCq7xmFdlNNXgCRIq7G-5RxQ	1	true
UCSv9d0kQegylHWpP83jWSQg	UC3Ooj_iDWELBumIEDejyNHQ	1	true
UCSv9d0kQegylHWpP83jWSQg	UCTGVdd_qB7Rz4X4oAKZ0kyg	1	true
UCSv9d0kQegylHWpP83jWSQg	UC01Os2Eeg6MCABfv384yKyQ	1	true
UCSv9d0kQegylHWpP83jWSQg	UCNMwzMh0MW_J_nK9kMS4ldg	1	true
UCSv9d0kQegylHWpP83jWSQg	UCvLNnnIZdqXYqAS-l8FLJFw	1	true
UCMMJm4lYxEh7GM4loYh6-SQ	UCMYTIyqS1-7wT-3pBB8bR5A	2	true
UCMMJm4lYxEh7GM4loYh6-SQ	UC4t2mdI8uAiJDJSRjiWJT1Q	1	true
UCMMJm4lYxEh7GM4loYh6-SQ	UCuAaB8lLRmoZzOrc_d_Ka0A	1	true
UCMMJm4lYxEh7GM4loYh6-SQ	UCORRcj9wv5DEYCEg2LhBcLQ	1	true
UCMMJm4lYxEh7GM4loYh6-SQ	UC9zqTTVeClpqMQ5CLuJdWtw	1	true
UCMMJm4lYxEh7GM4loYh6-SQ	UCPR3gVNYBzi-02_O4noC1Zg	1	true
UCMMJm4lYxEh7GM4loYh6-SQ	UC12zKGLhMhDeDidoctM6BrA	2	true
UCMMJm4lYxEh7GM4loYh6-SQ	UCHyeOQ0-Td0Dv3xfI0dwu3g	1	true
UCMMJm4lYxEh7GM4loYh6-SQ	UCthbIFAxbXTTQEC7EcQvP1Q	1	true
UCMMJm4lYxEh7GM4loYh6-SQ	UCGfBE94turq_hyKMxB-Dfrg	1	true
UCMMJm4lYxEh7GM4loYh6-SQ	UCy7oVBYY0FGXeeJpy6ITXxQ	1	true
UCMMJm4lYxEh7GM4loYh6-SQ	UC1RnMyP-HfZCyMLX0TmyMTg	1	true
UCMMJm4lYxEh7GM4loYh6-SQ	UCZmc8QllMtE-fr51p1niyjw	1	true
UCMMJm4lYxEh7GM4loYh6-SQ	UCVqS-HRwe2vq_Jjgu4fg-UA	1	true
UCMMJm4lYxEh7GM4loYh6-SQ	UCXQatvGsVCzrm35PnxoHJsA	1	true
UCMMJm4lYxEh7GM4loYh6-SQ	UC3Ooj_iDWELBumIEDejyNHQ	1	true
UCMMJm4lYxEh7GM4loYh6-SQ	UCH2VZQBLFTOp6I_qgnBJCuQ	1	true
UCMMJm4lYxEh7GM4loYh6-SQ	UCqZN-NqgP7bhbctbyThSVUA	1	true
UCMMJm4lYxEh7GM4loYh6-SQ	UC0LDNBjI8prPXedEj3QosOQ	1	true
UCMMJm4lYxEh7GM4loYh6-SQ	UCa1o8yRux22rDwRbEjokSPg	1	true
UCMMJm4lYxEh7GM4loYh6-SQ	UCl01kak5i66hCdS_bCxkkgA	1	true
UCMMJm4lYxEh7GM4loYh6-SQ	UCe1XNXkGImWSq5n4wkzNjBw	2	true
UCMMJm4lYxEh7GM4loYh6-SQ	UCnNvQI_yyWPZGI-rqFhR17Q	1	true
UCMMJm4lYxEh7GM4loYh6-SQ	UC9fxSdFjcz5QWDEhYCk_k1w	1	true
UCMMJm4lYxEh7GM4loYh6-SQ	UC49x20RykBnDY1RFHkdDnsw	1	true
UCMMJm4lYxEh7GM4loYh6-SQ	UCWq1xltHB2fDe6YkYoOrryg	1	true
UCMMJm4lYxEh7GM4loYh6-SQ	UC5ZXYxeWlROKbL7JziJ0bIQ	1	true
UCMMJm4lYxEh7GM4loYh6-SQ	UCgbbjw8zPkrmmL_XU1SgJBg	1	true
UCMMJm4lYxEh7GM4loYh6-SQ	UCWX70TFNwDsBLYlRzOe_-zw	1	true
UCMMJm4lYxEh7GM4loYh6-SQ	UCuqsl-IppoFW0uNPQfbXAVg	1	true
UCMMJm4lYxEh7GM4loYh6-SQ	UC1_-z9fMYofIUQWYUPoNyTw	1	true
UCMMJm4lYxEh7GM4loYh6-SQ	UCvLNnnIZdqXYqAS-l8FLJFw	1	true
UCMMJm4lYxEh7GM4loYh6-SQ	UC4F32QLrpDmmRrozxr9z59g	1	true
UCMMJm4lYxEh7GM4loYh6-SQ	UCyhRfD3HkB-0VbFA1prxjxw	1	true
UCMMJm4lYxEh7GM4loYh6-SQ	UCplIRjNdaKLVrAS4D-Dil7Q	1	true
UCuAaB8lLRmoZzOrc_d_Ka0A	UCV9EVCVbJus_StqIJ89ajLA	1	true
UCuAaB8lLRmoZzOrc_d_Ka0A	UCSv9d0kQegylHWpP83jWSQg	1	true
UCuAaB8lLRmoZzOrc_d_Ka0A	UC8hGUtfEgvvnp6IaHSAg1OQ	1	true
UCuAaB8lLRmoZzOrc_d_Ka0A	UCk0U1Js-um2lRjSF3VoS_3A	2	true
UCuAaB8lLRmoZzOrc_d_Ka0A	UCLxU3sH6BpHnqDRBXgGmUPw	1	true
UCuAaB8lLRmoZzOrc_d_Ka0A	UCl01kak5i66hCdS_bCxkkgA	2	true
UCuAaB8lLRmoZzOrc_d_Ka0A	UC3lP5c55UE0ozG-uN0uBsXg	9	true
UCuAaB8lLRmoZzOrc_d_Ka0A	UCqF3BLbPXpNGNgsV3oJvDlw	1	true
UCuAaB8lLRmoZzOrc_d_Ka0A	UC42k7FI53tnSSIjgzW-rbLA	12	true
UCuAaB8lLRmoZzOrc_d_Ka0A	UCGTfGu7XEakOH2wL1Si2rqA	1	true
UCuAaB8lLRmoZzOrc_d_Ka0A	UCAJAbdjUtxGM9zaD_epYpcA	1	true
UCuAaB8lLRmoZzOrc_d_Ka0A	UCRuR7ytSs0YokBvxr8rM3ZQ	1	true
UCuAaB8lLRmoZzOrc_d_Ka0A	UCz1xVDltULzUhZCJ1TkvnTQ	16	true
UCuAaB8lLRmoZzOrc_d_Ka0A	UCA2llkURdTm63bBB3nTBw1w	7	true
UCuAaB8lLRmoZzOrc_d_Ka0A	UC6RQhzm93SterWntL7GzqYQ	1	true
UCuAaB8lLRmoZzOrc_d_Ka0A	UCLHpzj63LeJ-IoRSGB3V2fg	2	true
UCuAaB8lLRmoZzOrc_d_Ka0A	UCPCwZ6sP0cAwgMsGZ23rOYA	2	true
UCuAaB8lLRmoZzOrc_d_Ka0A	UCepEtTIMTtU-MbFHz-pOZMw	1	true
UCuAaB8lLRmoZzOrc_d_Ka0A	UCbhT_vtlwr7X2wG6q_0mWVQ	3	true
UCuAaB8lLRmoZzOrc_d_Ka0A	UCuiLR4p6wQ3xLEm15pEn1Xw	1	true
UCuAaB8lLRmoZzOrc_d_Ka0A	UCUM4-KGZEXC2pk6zRDL9jMQ	1	true
UCuAaB8lLRmoZzOrc_d_Ka0A	UCOqOdxzU58qOGoysdnVXd9Q	7	true
UCuAaB8lLRmoZzOrc_d_Ka0A	UCVPdtCCsEsem4hyVwS_GzOQ	2	true
UCuAaB8lLRmoZzOrc_d_Ka0A	UCpuW6sUUE2Y0xW-KZhm347A	1	true
UCuAaB8lLRmoZzOrc_d_Ka0A	UCRfUfNEJVaY8AbAcb46qX0g	1	true
UC8b-2BfQ-PpYKESOfEGhYBQ	UCP-Vg2PcmLiWpEdvMI1R35w	1	true
UC8b-2BfQ-PpYKESOfEGhYBQ	UCuAaB8lLRmoZzOrc_d_Ka0A	3	true
UC8b-2BfQ-PpYKESOfEGhYBQ	UCXj2oSzwg6G0iBjKg33joMQ	1	true
UC8b-2BfQ-PpYKESOfEGhYBQ	UCPR3gVNYBzi-02_O4noC1Zg	1	true
UC8b-2BfQ-PpYKESOfEGhYBQ	UCghJZXv-Cg90zgdeTZCt_-A	1	true
UC8b-2BfQ-PpYKESOfEGhYBQ	UCHyeOQ0-Td0Dv3xfI0dwu3g	1	true
UC8b-2BfQ-PpYKESOfEGhYBQ	UCYfLDf9dRO6SW0hO2nPewrw	1	true
UC8b-2BfQ-PpYKESOfEGhYBQ	UCkrcoalvMERq3ehh5gH5j0Q	1	true
UC8b-2BfQ-PpYKESOfEGhYBQ	UC9zqTTVeClpqMQ5CLuJdWtw	2	true
UC8b-2BfQ-PpYKESOfEGhYBQ	UCGILPX9AE6hZpqp1FjFn6pw	1	true
UC8b-2BfQ-PpYKESOfEGhYBQ	UCil8_HWnWScf4Xmt4FSdU7w	1	true
UC8b-2BfQ-PpYKESOfEGhYBQ	UCVqS-HRwe2vq_Jjgu4fg-UA	1	true
UC8b-2BfQ-PpYKESOfEGhYBQ	UCH2VZQBLFTOp6I_qgnBJCuQ	1	true
UC8b-2BfQ-PpYKESOfEGhYBQ	UC-WaPlIfAQP3IuydN6dhbhA	1	true
UC8b-2BfQ-PpYKESOfEGhYBQ	UC3Ooj_iDWELBumIEDejyNHQ	1	true
UC8b-2BfQ-PpYKESOfEGhYBQ	UCMMJm4lYxEh7GM4loYh6-SQ	1	true
UC8b-2BfQ-PpYKESOfEGhYBQ	UCa1o8yRux22rDwRbEjokSPg	1	true
UC8b-2BfQ-PpYKESOfEGhYBQ	UC1LRaE3XaXAanf1XJXgrVIw	1	true
UC8b-2BfQ-PpYKESOfEGhYBQ	UC9fxSdFjcz5QWDEhYCk_k1w	1	true
UC8b-2BfQ-PpYKESOfEGhYBQ	UCnNvQI_yyWPZGI-rqFhR17Q	1	true
UC8b-2BfQ-PpYKESOfEGhYBQ	UCgbbjw8zPkrmmL_XU1SgJBg	1	true
UC8b-2BfQ-PpYKESOfEGhYBQ	UC5ZXYxeWlROKbL7JziJ0bIQ	1	true
UC8b-2BfQ-PpYKESOfEGhYBQ	UCdKg0aioEqn_tbfBGz_ltFw	1	true
UC8b-2BfQ-PpYKESOfEGhYBQ	UCWq1xltHB2fDe6YkYoOrryg	1	true
UC8b-2BfQ-PpYKESOfEGhYBQ	UC3vZWDAhX5356m17Vy1B2GA	1	true
UC8b-2BfQ-PpYKESOfEGhYBQ	UC1_-z9fMYofIUQWYUPoNyTw	1	true
UC8b-2BfQ-PpYKESOfEGhYBQ	UCsAMQ6_-iRdEWBVh8q-IXmA	1	true
UC8b-2BfQ-PpYKESOfEGhYBQ	UCvLNnnIZdqXYqAS-l8FLJFw	1	true
UC8b-2BfQ-PpYKESOfEGhYBQ	UCT913ORodTxCG9HdXroYPtQ	1	true
UCGILPX9AE6hZpqp1FjFn6pw	UCsT0YIqwnpJCM-mx7-gSA4Q	1	true
UCGILPX9AE6hZpqp1FjFn6pw	UCQdOZmbeT9UoQy8G3zeNE-g	1	true
UCGILPX9AE6hZpqp1FjFn6pw	UCGILPX9AE6hZpqp1FjFn6pw	45	true
UCGILPX9AE6hZpqp1FjFn6pw	UCk0U1Js-um2lRjSF3VoS_3A	1	true
UCGILPX9AE6hZpqp1FjFn6pw	UC5hGM-gAk5I8zmn8xUKuNkw	1	true
UCGILPX9AE6hZpqp1FjFn6pw	UCuAaB8lLRmoZzOrc_d_Ka0A	2	true
UCGILPX9AE6hZpqp1FjFn6pw	UCmpHPgeCBgvk_fDXZQKsnAA	1	true
UCGILPX9AE6hZpqp1FjFn6pw	UC42k7FI53tnSSIjgzW-rbLA	3	true
UCGILPX9AE6hZpqp1FjFn6pw	UCKtJs_zI1yzswHDWqkqHtWw	1	true
UCGILPX9AE6hZpqp1FjFn6pw	UCGuv-PMjNhYc9wyZFr15ASg	1	true
UCGILPX9AE6hZpqp1FjFn6pw	UC9zqTTVeClpqMQ5CLuJdWtw	3	true
UCGILPX9AE6hZpqp1FjFn6pw	UCPR3gVNYBzi-02_O4noC1Zg	1	true
UCGILPX9AE6hZpqp1FjFn6pw	UCqALeERk6OhLGaG_PIG_RJA	2	true
UCGILPX9AE6hZpqp1FjFn6pw	UCO5eykNr9w8p5eoGQz3AFfg	1	true
UCGILPX9AE6hZpqp1FjFn6pw	UCHyeOQ0-Td0Dv3xfI0dwu3g	1	true
UCGILPX9AE6hZpqp1FjFn6pw	UC3lP5c55UE0ozG-uN0uBsXg	5	true
UCGILPX9AE6hZpqp1FjFn6pw	UC2qRcwgwOLchPYFPqCCHVhQ	1	true
UCGILPX9AE6hZpqp1FjFn6pw	UCFbx6QBTcDI6toOnO-EyajQ	9	true
UCGILPX9AE6hZpqp1FjFn6pw	UC1LRaE3XaXAanf1XJXgrVIw	1	true
UCGILPX9AE6hZpqp1FjFn6pw	UCH2VZQBLFTOp6I_qgnBJCuQ	1	true
UCGILPX9AE6hZpqp1FjFn6pw	UCMMJm4lYxEh7GM4loYh6-SQ	1	true
UCGILPX9AE6hZpqp1FjFn6pw	UC3Ooj_iDWELBumIEDejyNHQ	1	true
UCGILPX9AE6hZpqp1FjFn6pw	UC9fxSdFjcz5QWDEhYCk_k1w	1	true
UCGILPX9AE6hZpqp1FjFn6pw	UCgbbjw8zPkrmmL_XU1SgJBg	1	true
UCGILPX9AE6hZpqp1FjFn6pw	UC5ZXYxeWlROKbL7JziJ0bIQ	1	true
UCGILPX9AE6hZpqp1FjFn6pw	UCnNvQI_yyWPZGI-rqFhR17Q	1	true
UCGILPX9AE6hZpqp1FjFn6pw	UCJIKKHplhnzcDmpztqUO7nA	1	true
UCGILPX9AE6hZpqp1FjFn6pw	UCWq1xltHB2fDe6YkYoOrryg	1	true
UCGILPX9AE6hZpqp1FjFn6pw	UCJUhAFvFypnG_E7vWimQQYw	1	true
UCGILPX9AE6hZpqp1FjFn6pw	UCdKg0aioEqn_tbfBGz_ltFw	1	true
UCGILPX9AE6hZpqp1FjFn6pw	UCvLNnnIZdqXYqAS-l8FLJFw	1	true
UCGILPX9AE6hZpqp1FjFn6pw	UC5xF-T4J_uM0NrCkOO5e0PQ	1	true
UCGILPX9AE6hZpqp1FjFn6pw	UC3vZWDAhX5356m17Vy1B2GA	1	true
UC3Ooj_iDWELBumIEDejyNHQ	UClu474HMt895mVxZdlIHXEA	7	true
UC3Ooj_iDWELBumIEDejyNHQ	UCG-eghyORxNrzSG8FkAWKyw	1	true
UC3Ooj_iDWELBumIEDejyNHQ	UCPCwZ6sP0cAwgMsGZ23rOYA	1	true
UC3Ooj_iDWELBumIEDejyNHQ	UC3Ooj_iDWELBumIEDejyNHQ	138	true
UC3Ooj_iDWELBumIEDejyNHQ	UCmEClzCBDx-vrt0GuSKBd9g	1	true
UC3Ooj_iDWELBumIEDejyNHQ	UCPR3gVNYBzi-02_O4noC1Zg	1	true
UC3Ooj_iDWELBumIEDejyNHQ	UCdGpd0gNn38UKwoncZd9rmA	10	true
UC3Ooj_iDWELBumIEDejyNHQ	UCA1nC2t2zfzBOySscmpIzGQ	1	true
UC3Ooj_iDWELBumIEDejyNHQ	UCKtJs_zI1yzswHDWqkqHtWw	1	true
UC3Ooj_iDWELBumIEDejyNHQ	UCORRcj9wv5DEYCEg2LhBcLQ	1	true
UC3Ooj_iDWELBumIEDejyNHQ	UChHd-MU2mOvZHmBQz6zJw_w	1	true
UC3Ooj_iDWELBumIEDejyNHQ	UCB0zinWfy-dS_NqcOINYo3A	3	true
UC3Ooj_iDWELBumIEDejyNHQ	UCMYTIyqS1-7wT-3pBB8bR5A	1	true
UC3Ooj_iDWELBumIEDejyNHQ	UC9zqTTVeClpqMQ5CLuJdWtw	1	true
UC3Ooj_iDWELBumIEDejyNHQ	UCqZN-NqgP7bhbctbyThSVUA	1	true
UC3Ooj_iDWELBumIEDejyNHQ	UC0ABb9XMjG8M_rmxbxtW6Qw	1	true
UC3Ooj_iDWELBumIEDejyNHQ	UCuAaB8lLRmoZzOrc_d_Ka0A	1	true
UC3Ooj_iDWELBumIEDejyNHQ	UCXj2oSzwg6G0iBjKg33joMQ	1	true
UC3Ooj_iDWELBumIEDejyNHQ	UCGfBE94turq_hyKMxB-Dfrg	1	true
UC3Ooj_iDWELBumIEDejyNHQ	UCHyeOQ0-Td0Dv3xfI0dwu3g	1	true
UC3Ooj_iDWELBumIEDejyNHQ	UCH2VZQBLFTOp6I_qgnBJCuQ	1	true
UC3Ooj_iDWELBumIEDejyNHQ	UCbrt8UdV49AqgT7-VaXmlwQ	2	true
UC3Ooj_iDWELBumIEDejyNHQ	UCGILPX9AE6hZpqp1FjFn6pw	1	true
UC3Ooj_iDWELBumIEDejyNHQ	UCLXl1V6n82Dyg1VhVgSL0nw	1	true
UC3Ooj_iDWELBumIEDejyNHQ	UCMMJm4lYxEh7GM4loYh6-SQ	1	true
UC3Ooj_iDWELBumIEDejyNHQ	UCsYo9r-JIEkhoRoc9G5gdpQ	1	true
UC3Ooj_iDWELBumIEDejyNHQ	UCl10NIdDOn9MMWdKNyo_YdA	3	true
UC3Ooj_iDWELBumIEDejyNHQ	UCn9Erjy00mpnWeLnRqhsA1g	3	true
UC3Ooj_iDWELBumIEDejyNHQ	UC9fxSdFjcz5QWDEhYCk_k1w	1	true
UC3Ooj_iDWELBumIEDejyNHQ	UCWq1xltHB2fDe6YkYoOrryg	10	true
UC3Ooj_iDWELBumIEDejyNHQ	UCgbbjw8zPkrmmL_XU1SgJBg	1	true
UC3Ooj_iDWELBumIEDejyNHQ	UCflCE9dixPqeC_EaSqQAqrw	1	true
UC3Ooj_iDWELBumIEDejyNHQ	UCnNvQI_yyWPZGI-rqFhR17Q	1	true
UC3Ooj_iDWELBumIEDejyNHQ	UC-NwgkrLPYmzM-xoLr2GX-Q	2	true
UC3Ooj_iDWELBumIEDejyNHQ	UC2mdv67uDPQO35IYkzK_Xzw	1	true
UC3Ooj_iDWELBumIEDejyNHQ	UCyuDCBA1ig-x1YeAQBX2b4g	1	true
UC3Ooj_iDWELBumIEDejyNHQ	UCvLNnnIZdqXYqAS-l8FLJFw	1	true
UC3Ooj_iDWELBumIEDejyNHQ	UC1_-z9fMYofIUQWYUPoNyTw	1	true
UC3Ooj_iDWELBumIEDejyNHQ	UC3vZWDAhX5356m17Vy1B2GA	1	true
UC3Ooj_iDWELBumIEDejyNHQ	UCstACT0WwMpTjTrbpFYk16Q	14	true
UChsZDP7pW_08Sk6Tp4U8KJA	UChsZDP7pW_08Sk6Tp4U8KJA	535	true
UChsZDP7pW_08Sk6Tp4U8KJA	UCXuqSBlHAE6Xw-yeJA0Tunw	1	true
UChsZDP7pW_08Sk6Tp4U8KJA	UCDlVDJqYqHYEcgHRn8Mf25g	1	true
UChsZDP7pW_08Sk6Tp4U8KJA	UCuAaB8lLRmoZzOrc_d_Ka0A	2	true
UChsZDP7pW_08Sk6Tp4U8KJA	UCN1ihdoKXeixzYi7Hyp4WwQ	1	true
UChsZDP7pW_08Sk6Tp4U8KJA	UCN-opsqqDunWO6h5uCp9Y4g	1	true
UChsZDP7pW_08Sk6Tp4U8KJA	UC9zqTTVeClpqMQ5CLuJdWtw	1	true
UChsZDP7pW_08Sk6Tp4U8KJA	UCz1xVDltULzUhZCJ1TkvnTQ	1	true
UChsZDP7pW_08Sk6Tp4U8KJA	UC6OUstIo-qXiJzcsJ0toz-A	1	true
UChsZDP7pW_08Sk6Tp4U8KJA	UCP-Vg2PcmLiWpEdvMI1R35w	1	true
UChsZDP7pW_08Sk6Tp4U8KJA	UCDK5XAOArmsSQKZ_kBoYKOA	1	true
UChsZDP7pW_08Sk6Tp4U8KJA	UCthbIFAxbXTTQEC7EcQvP1Q	1	true
UChsZDP7pW_08Sk6Tp4U8KJA	UCjaWLFTNqLkq3ZY2BJ4NYRg	1	true
UChsZDP7pW_08Sk6Tp4U8KJA	UCwJXtk_1CKlCrh7YJDP2uPw	1	true
UChsZDP7pW_08Sk6Tp4U8KJA	UCk9mgpQVdJ5oKQWkM1UPBaQ	1	true
UChsZDP7pW_08Sk6Tp4U8KJA	UCHyeOQ0-Td0Dv3xfI0dwu3g	1	true
UChsZDP7pW_08Sk6Tp4U8KJA	UCMMJm4lYxEh7GM4loYh6-SQ	1	true
UChsZDP7pW_08Sk6Tp4U8KJA	UCWq1xltHB2fDe6YkYoOrryg	1	true
UChsZDP7pW_08Sk6Tp4U8KJA	UCP391YRAjSOdM_bwievgaZA	1	true
UChsZDP7pW_08Sk6Tp4U8KJA	UCaEplKvlFhyg7P3eBmRtyCQ	1	true
UChsZDP7pW_08Sk6Tp4U8KJA	UCzYrkkCI1yvqvQyD-j56RIA	1	true
UChsZDP7pW_08Sk6Tp4U8KJA	UC5ZXYxeWlROKbL7JziJ0bIQ	1	true
UChsZDP7pW_08Sk6Tp4U8KJA	UClcatj2SigXMklFrqQtnA-Q	1	true
UChsZDP7pW_08Sk6Tp4U8KJA	UCmV27tf2iqUZDDtXiShSKUg	1	true
UChsZDP7pW_08Sk6Tp4U8KJA	UCnNvQI_yyWPZGI-rqFhR17Q	1	true
UChsZDP7pW_08Sk6Tp4U8KJA	UCOqOdxzU58qOGoysdnVXd9Q	1	true
UCu_a6PAzp30Bn2mM-Ll09LA	UCthbIFAxbXTTQEC7EcQvP1Q	2	true
UCu_a6PAzp30Bn2mM-Ll09LA	UCP-Vg2PcmLiWpEdvMI1R35w	2	true
UCu_a6PAzp30Bn2mM-Ll09LA	UCN-opsqqDunWO6h5uCp9Y4g	6	true
UCu_a6PAzp30Bn2mM-Ll09LA	UCfYrK5JU5EznsnK3wQE7iIg	1	true
UCu_a6PAzp30Bn2mM-Ll09LA	UCuiLR4p6wQ3xLEm15pEn1Xw	2	true
UCu_a6PAzp30Bn2mM-Ll09LA	UCu_a6PAzp30Bn2mM-Ll09LA	1	true
UCu_a6PAzp30Bn2mM-Ll09LA	UC4zG6UeNUn-HM6UEFFkiESA	1	true
UCu_a6PAzp30Bn2mM-Ll09LA	UC4MWeXk20bRyIGQsiZXPe6Q	1	true
UCu_a6PAzp30Bn2mM-Ll09LA	UC12zKGLhMhDeDidoctM6BrA	3	true
UCu_a6PAzp30Bn2mM-Ll09LA	UC9zqTTVeClpqMQ5CLuJdWtw	2	true
UCu_a6PAzp30Bn2mM-Ll09LA	UCMYTIyqS1-7wT-3pBB8bR5A	1	true
UCu_a6PAzp30Bn2mM-Ll09LA	UC_53VGoH_0XLFmYVpGMvhvg	1	true
UCu_a6PAzp30Bn2mM-Ll09LA	UCp6tx5isUZCgQnvEwbOVC-Q	1	true
UCu_a6PAzp30Bn2mM-Ll09LA	UCXdXYG8dUmEv6jhEji_lSHg	1	true
UCu_a6PAzp30Bn2mM-Ll09LA	UCG-eghyORxNrzSG8FkAWKyw	3	true
UCu_a6PAzp30Bn2mM-Ll09LA	UCxt_nr6Xwbq4O2Ur9ZBpgAA	1	true
UCu_a6PAzp30Bn2mM-Ll09LA	UCH2VZQBLFTOp6I_qgnBJCuQ	1	true
UCu_a6PAzp30Bn2mM-Ll09LA	UCv2svvDbMNunUuPs8hUUKVA	1	true
UCu_a6PAzp30Bn2mM-Ll09LA	UCXj2oSzwg6G0iBjKg33joMQ	1	true
UCu_a6PAzp30Bn2mM-Ll09LA	UCDtVoSwSwQgwhcC89Nlz5Vg	1	true
UCu_a6PAzp30Bn2mM-Ll09LA	UCT0JugAtGmqiYkwxFZOwAtg	1	true
UCu_a6PAzp30Bn2mM-Ll09LA	UCJWBZ_U49wLgqS5fefJ7STw	1	true
UCu_a6PAzp30Bn2mM-Ll09LA	UCjaWLFTNqLkq3ZY2BJ4NYRg	2	true
UCu_a6PAzp30Bn2mM-Ll09LA	UCVrKQMmA2ew9LFzeIDaOFgw	3	true
UCu_a6PAzp30Bn2mM-Ll09LA	UCN1ihdoKXeixzYi7Hyp4WwQ	1	true
UCu_a6PAzp30Bn2mM-Ll09LA	UCdKJlY5eAoSumIlcOcYxIGg	1	true
UCu_a6PAzp30Bn2mM-Ll09LA	UCUtDAMp91VCfHTZ9_ypKRPA	1	true
UCu_a6PAzp30Bn2mM-Ll09LA	UClu474HMt895mVxZdlIHXEA	1	true
UCu_a6PAzp30Bn2mM-Ll09LA	UCk9mgpQVdJ5oKQWkM1UPBaQ	2	true
UCu_a6PAzp30Bn2mM-Ll09LA	UCNl_i-ggJbZNyOLlhE7yyhw	1	true
UCu_a6PAzp30Bn2mM-Ll09LA	UCGfBE94turq_hyKMxB-Dfrg	1	true
UCu_a6PAzp30Bn2mM-Ll09LA	UCcoPc-BqFPkVkkwyS35J-ng	1	true
UCu_a6PAzp30Bn2mM-Ll09LA	UCUmEPYxmnyQDeRUcFkslmQw	1	true
UCu_a6PAzp30Bn2mM-Ll09LA	UCoyhq57ClXRTd4h8vpiMelA	1	true
UCu_a6PAzp30Bn2mM-Ll09LA	UCrRLxJiZvwAAWj0bcxdvPAA	1	true
UCthbIFAxbXTTQEC7EcQvP1Q	UCthbIFAxbXTTQEC7EcQvP1Q	211	true
UCthbIFAxbXTTQEC7EcQvP1Q	UCcoPc-BqFPkVkkwyS35J-ng	3	true
UCthbIFAxbXTTQEC7EcQvP1Q	UCN-opsqqDunWO6h5uCp9Y4g	4	true
UCthbIFAxbXTTQEC7EcQvP1Q	UCMYTIyqS1-7wT-3pBB8bR5A	1	true
UCthbIFAxbXTTQEC7EcQvP1Q	UC4zG6UeNUn-HM6UEFFkiESA	5	true
UCthbIFAxbXTTQEC7EcQvP1Q	UCEWHPFNilsT0IfQfutVzsag	2	true
UCthbIFAxbXTTQEC7EcQvP1Q	UCDtVoSwSwQgwhcC89Nlz5Vg	1	true
UCthbIFAxbXTTQEC7EcQvP1Q	UC2mmP8ysfyko40KSn90x6Og	3	true
UCthbIFAxbXTTQEC7EcQvP1Q	UCv2svvDbMNunUuPs8hUUKVA	1	true
UCthbIFAxbXTTQEC7EcQvP1Q	UCk9mgpQVdJ5oKQWkM1UPBaQ	1	true
UCthbIFAxbXTTQEC7EcQvP1Q	UCjjYaSHsZSUNTSwUV8OfOrA	1	true
UCthbIFAxbXTTQEC7EcQvP1Q	UCP391YRAjSOdM_bwievgaZA	3	true
UCthbIFAxbXTTQEC7EcQvP1Q	UC9zqTTVeClpqMQ5CLuJdWtw	13	true
UCthbIFAxbXTTQEC7EcQvP1Q	UCOQ_KwPhg3IZbigiK7NCnfQ	1	true
UCthbIFAxbXTTQEC7EcQvP1Q	UCjaWLFTNqLkq3ZY2BJ4NYRg	1	true
UCthbIFAxbXTTQEC7EcQvP1Q	UCq8ChnGCYMVCzDgGMK9e91A	4	true
UCthbIFAxbXTTQEC7EcQvP1Q	UCH2VZQBLFTOp6I_qgnBJCuQ	3	true
UCthbIFAxbXTTQEC7EcQvP1Q	UCtrjFP7i92_30uv6IehwE5Q	1	true
UCthbIFAxbXTTQEC7EcQvP1Q	UClu474HMt895mVxZdlIHXEA	2	true
UCthbIFAxbXTTQEC7EcQvP1Q	UCh7TUTXojlE8vRtb-EnuDzw	1	true
UCthbIFAxbXTTQEC7EcQvP1Q	UCdGpd0gNn38UKwoncZd9rmA	5	true
UCthbIFAxbXTTQEC7EcQvP1Q	UCbAiIkPobUFy71zlmwVw3jw	1	true
UCthbIFAxbXTTQEC7EcQvP1Q	UCV306eHqgo0LvBf3Mh36AHg	1	true
UCthbIFAxbXTTQEC7EcQvP1Q	UCNl_i-ggJbZNyOLlhE7yyhw	1	true
UCthbIFAxbXTTQEC7EcQvP1Q	UCsgHWN8lYveMUEWTDheTjZA	2	true
UCthbIFAxbXTTQEC7EcQvP1Q	UCVrKQMmA2ew9LFzeIDaOFgw	2	true
UCthbIFAxbXTTQEC7EcQvP1Q	UCbeCLZ2E_oD071BkTCw5uRQ	1	true
UCthbIFAxbXTTQEC7EcQvP1Q	UCy7oVBYY0FGXeeJpy6ITXxQ	1	true
UCthbIFAxbXTTQEC7EcQvP1Q	UCUp-GSUuNxSZ7cxOg7ZnyqA	3	true
UCthbIFAxbXTTQEC7EcQvP1Q	UCqZN-NqgP7bhbctbyThSVUA	1	true
UCthbIFAxbXTTQEC7EcQvP1Q	UCPQqOZhDKr9AjLfXDOjoaww	3	true
UCthbIFAxbXTTQEC7EcQvP1Q	UCLWAkPY5RjvCuwJu_C3Ok-A	2	true
UCthbIFAxbXTTQEC7EcQvP1Q	UC7qK1TCeLAr8qOeclO-s39g	1	true
UCthbIFAxbXTTQEC7EcQvP1Q	UCUmEPYxmnyQDeRUcFkslmQw	1	true
UCthbIFAxbXTTQEC7EcQvP1Q	UCQz-h9kq50OxKmU2yGoOWlg	1	true
UCthbIFAxbXTTQEC7EcQvP1Q	UCkSjy-IOEq-eMtarZl2uH1Q	1	true
UCthbIFAxbXTTQEC7EcQvP1Q	UCu_a6PAzp30Bn2mM-Ll09LA	1	true
UCthbIFAxbXTTQEC7EcQvP1Q	UCwVmZjJwkCUCOes5_eAIebg	1	true
UCthbIFAxbXTTQEC7EcQvP1Q	UC4F32QLrpDmmRrozxr9z59g	2	true
UCthbIFAxbXTTQEC7EcQvP1Q	UCSyUhW3u3JazIT3VtE4nCEw	1	true
UCthbIFAxbXTTQEC7EcQvP1Q	UCr0NQAx7C64fOrNxVdc8gYA	1	true
UCyuDCBA1ig-x1YeAQBX2b4g	UCuAaB8lLRmoZzOrc_d_Ka0A	3	true
UCyuDCBA1ig-x1YeAQBX2b4g	UCKtJs_zI1yzswHDWqkqHtWw	1	true
UCyuDCBA1ig-x1YeAQBX2b4g	UCMYTIyqS1-7wT-3pBB8bR5A	3	true
UCyuDCBA1ig-x1YeAQBX2b4g	UC12zKGLhMhDeDidoctM6BrA	2	true
UCyuDCBA1ig-x1YeAQBX2b4g	UCE0KRm8m9_ki8MrMYGyjpAw	1	true
UCyuDCBA1ig-x1YeAQBX2b4g	UC9zqTTVeClpqMQ5CLuJdWtw	2	true
UCyuDCBA1ig-x1YeAQBX2b4g	UC45WrWwAypYvlhYbuG9UNqQ	1	true
UCyuDCBA1ig-x1YeAQBX2b4g	UCFl00VTEDEA0cHCoMQ7CuZg	1	true
UCyuDCBA1ig-x1YeAQBX2b4g	UCSv9d0kQegylHWpP83jWSQg	1	true
UCyuDCBA1ig-x1YeAQBX2b4g	UCjaWLFTNqLkq3ZY2BJ4NYRg	2	true
UCyuDCBA1ig-x1YeAQBX2b4g	UCDtVoSwSwQgwhcC89Nlz5Vg	1	true
UCyuDCBA1ig-x1YeAQBX2b4g	UCGfBE94turq_hyKMxB-Dfrg	1	true
UCyuDCBA1ig-x1YeAQBX2b4g	UCzzv3f3UIhYZlIeuOl2QH9Q	1	true
UCyuDCBA1ig-x1YeAQBX2b4g	UCCD5yY6oDcu-PvLnP4FIJ8A	2	true
UCyuDCBA1ig-x1YeAQBX2b4g	UChHd-MU2mOvZHmBQz6zJw_w	1	true
UCyuDCBA1ig-x1YeAQBX2b4g	UCxucJ9P3mLMneYypLZYn2uw	1	true
UCyuDCBA1ig-x1YeAQBX2b4g	UCNmv_2YqryuyhB79ehzOsmQ	1	true
UCyuDCBA1ig-x1YeAQBX2b4g	UC8IbAhPglJ1OeC44A_Gtmqg	1	true
UCyuDCBA1ig-x1YeAQBX2b4g	UCUtDAMp91VCfHTZ9_ypKRPA	2	true
UCyuDCBA1ig-x1YeAQBX2b4g	UCCWZCP1lQxWvjQUUOWc6dFw	1	true
UCyuDCBA1ig-x1YeAQBX2b4g	UCGILPX9AE6hZpqp1FjFn6pw	1	true
UCyuDCBA1ig-x1YeAQBX2b4g	UCK0SYPK1n9055P-JjLkOZJw	1	true
UCyuDCBA1ig-x1YeAQBX2b4g	UCHyeOQ0-Td0Dv3xfI0dwu3g	1	true
UCyuDCBA1ig-x1YeAQBX2b4g	UC1VlEIPGhDqaUsL7Vg__hHA	1	true
UCyuDCBA1ig-x1YeAQBX2b4g	UCMMJm4lYxEh7GM4loYh6-SQ	1	true
UCyuDCBA1ig-x1YeAQBX2b4g	UC42k7FI53tnSSIjgzW-rbLA	1	true
UCyuDCBA1ig-x1YeAQBX2b4g	UCzDQaYfHMJrXfw46whk6hIg	1	true
UCyuDCBA1ig-x1YeAQBX2b4g	UC3Ooj_iDWELBumIEDejyNHQ	1	true
UCyuDCBA1ig-x1YeAQBX2b4g	UCgbbjw8zPkrmmL_XU1SgJBg	1	true
UCyuDCBA1ig-x1YeAQBX2b4g	UCV306eHqgo0LvBf3Mh36AHg	1	true
UCyuDCBA1ig-x1YeAQBX2b4g	UCcSJI9MVSPEhKt5OnOv2Mdw	1	true
UCyuDCBA1ig-x1YeAQBX2b4g	UCnNvQI_yyWPZGI-rqFhR17Q	1	true
UCyuDCBA1ig-x1YeAQBX2b4g	UCmV27tf2iqUZDDtXiShSKUg	1	true
UCyuDCBA1ig-x1YeAQBX2b4g	UChFmohIxapcro2kigBCT_AQ	1	true
UCyuDCBA1ig-x1YeAQBX2b4g	UC2mdv67uDPQO35IYkzK_Xzw	1	true
UCyuDCBA1ig-x1YeAQBX2b4g	UCKWtY_NSa3xTkz0YT28QNSg	1	true
UCyuDCBA1ig-x1YeAQBX2b4g	UCOqOdxzU58qOGoysdnVXd9Q	1	true
UCyuDCBA1ig-x1YeAQBX2b4g	UCj0aH1oJz-m3n6TDW-Ly20w	1	true
UCyuDCBA1ig-x1YeAQBX2b4g	UC3vZWDAhX5356m17Vy1B2GA	1	true
UCP391YRAjSOdM_bwievgaZA	UCT2X19JJaJGUN7mrYuImANQ	4	true
UCP391YRAjSOdM_bwievgaZA	UCvgfXK4nTYKudb0rFR6noLA	4	true
UCP391YRAjSOdM_bwievgaZA	UCsTcErHg8oDvUnTzoqsYeNw	4	true
UCP391YRAjSOdM_bwievgaZA	UCGwu0nbY2wSkW8N-cghnLpA	4	true
UCP391YRAjSOdM_bwievgaZA	UC789h3eqw0H1HqGmIsI26OA	4	true
UCP391YRAjSOdM_bwievgaZA	UCX6OQ3DkcsbYNE6H8uQQuVA	4	true
UCP391YRAjSOdM_bwievgaZA	UCwO_xoYm2vjhu4kZSxFO5mA	4	true
UCP391YRAjSOdM_bwievgaZA	UCMNmwqCtCSpftrbvR3KkHDA	4	true
UCP391YRAjSOdM_bwievgaZA	UCZWlScCmjiezyIRAybUgXYQ	4	true
UCP391YRAjSOdM_bwievgaZA	UCilwZiBBfI9X6yiZRzWty8Q	3	true
UCP391YRAjSOdM_bwievgaZA	UC3EFKdXAU99j3ppGgvTz7XQ	3	true
UCH2VZQBLFTOp6I_qgnBJCuQ	UCH2VZQBLFTOp6I_qgnBJCuQ	256	true
UCH2VZQBLFTOp6I_qgnBJCuQ	UC0otZdGYsA9KqVKAcn2peQA	1	true
UCH2VZQBLFTOp6I_qgnBJCuQ	UCF5OxapO7zJUkX9EYvGwN_Q	7	true
UCH2VZQBLFTOp6I_qgnBJCuQ	UCV306eHqgo0LvBf3Mh36AHg	15	true
UCH2VZQBLFTOp6I_qgnBJCuQ	UCuxfOdbKQy0tgGXcm9sjHiw	4	true
UCH2VZQBLFTOp6I_qgnBJCuQ	UCn9Erjy00mpnWeLnRqhsA1g	8	true
UCH2VZQBLFTOp6I_qgnBJCuQ	UCj0O6W8yDuLg3iraAXKgCrQ	5	true
UCH2VZQBLFTOp6I_qgnBJCuQ	UCgWOsOjYMJyndvwyU9gzBKQ	1	true
UCH2VZQBLFTOp6I_qgnBJCuQ	UCIQPHl1WKKTt9KkWyo_JNig	30	true
UCH2VZQBLFTOp6I_qgnBJCuQ	UC13ikrGSy3E2AveqLAI9lqg	2	true
UCH2VZQBLFTOp6I_qgnBJCuQ	UClu474HMt895mVxZdlIHXEA	8	true
UCH2VZQBLFTOp6I_qgnBJCuQ	UCthbIFAxbXTTQEC7EcQvP1Q	1	true
UCH2VZQBLFTOp6I_qgnBJCuQ	UCJWCecuSUa9CsNQ4MGJ_g3A	2	true
UCH2VZQBLFTOp6I_qgnBJCuQ	UCzGwyAyWLB2Si6VDFpq8rjw	2	true
UCH2VZQBLFTOp6I_qgnBJCuQ	UCweLVJlESUt6fCdDFeDXgcA	7	true
UCH2VZQBLFTOp6I_qgnBJCuQ	UCjWw8sBL0PPZLPxusmNLvAQ	1	true
UCH2VZQBLFTOp6I_qgnBJCuQ	UCnU2EtUW8Z4DxSqXxJ5cMQg	3	true
UCH2VZQBLFTOp6I_qgnBJCuQ	UCtrjFP7i92_30uv6IehwE5Q	2	true
UCH2VZQBLFTOp6I_qgnBJCuQ	UCB0zinWfy-dS_NqcOINYo3A	1	true
UCH2VZQBLFTOp6I_qgnBJCuQ	UCk5P5ft8WxlmBrvwmqmYLwQ	1	true
UCH2VZQBLFTOp6I_qgnBJCuQ	UCaSAM5kna2KyX-uVLSGr8PQ	1	true
UCH2VZQBLFTOp6I_qgnBJCuQ	UCmEClzCBDx-vrt0GuSKBd9g	5	true
UCH2VZQBLFTOp6I_qgnBJCuQ	UCXj2oSzwg6G0iBjKg33joMQ	1	true
UCH2VZQBLFTOp6I_qgnBJCuQ	UCFbx6QBTcDI6toOnO-EyajQ	1	true
UCH2VZQBLFTOp6I_qgnBJCuQ	UCdGpd0gNn38UKwoncZd9rmA	2	true
UCH2VZQBLFTOp6I_qgnBJCuQ	UCOX1xjMcnZVmV-yx0VC6Fvg	1	true
UCH2VZQBLFTOp6I_qgnBJCuQ	UC2oZNzo6o37qejkFQE2dIAA	1	true
UCH2VZQBLFTOp6I_qgnBJCuQ	UCTe18hXXnFNL7FDdnVfIqEQ	2	true
UCH2VZQBLFTOp6I_qgnBJCuQ	UCbxeWUKWro8bMscsa36-BtA	1	true
UCH2VZQBLFTOp6I_qgnBJCuQ	UCyE4KeQg54Bx34LxQB22xkw	1	true
UCH2VZQBLFTOp6I_qgnBJCuQ	UCe1XNXkGImWSq5n4wkzNjBw	1	true
UCH2VZQBLFTOp6I_qgnBJCuQ	UCpwFulVhWRsS92nYOTdh-uw	2	true
UCH2VZQBLFTOp6I_qgnBJCuQ	UCgheXPYps0uCdB60AvUQYbg	2	true
UCH2VZQBLFTOp6I_qgnBJCuQ	UCWijW6tW0iI5ghsAbWDFtTg	6	true
UCH2VZQBLFTOp6I_qgnBJCuQ	UCyG6SY3s8fS7ZKje6lv1JKg	4	true
UCH2VZQBLFTOp6I_qgnBJCuQ	UCwumfjrPgLl0H2wS7juY5Xw	1	true
UCH2VZQBLFTOp6I_qgnBJCuQ	UCKXlbJbeAb8uTdRHJhlwE1g	3	true
UCH2VZQBLFTOp6I_qgnBJCuQ	UCYALxwppPJjYyTMEwwEcNCQ	1	true
UCH2VZQBLFTOp6I_qgnBJCuQ	UCT4jm6o-mUMuo1bKHcHSIfA	4	true
UCH2VZQBLFTOp6I_qgnBJCuQ	UCz1xVDltULzUhZCJ1TkvnTQ	1	true
UCBx_CluVFNvy0TXsmNBZ-ow	UCBx_CluVFNvy0TXsmNBZ-ow	7	true
UCBx_CluVFNvy0TXsmNBZ-ow	UCuAaB8lLRmoZzOrc_d_Ka0A	1	true
UCBx_CluVFNvy0TXsmNBZ-ow	UCuiLR4p6wQ3xLEm15pEn1Xw	1	true
UCBx_CluVFNvy0TXsmNBZ-ow	UC_vFhB8UkkdeiOOOZTeXG7A	1	true
UCBx_CluVFNvy0TXsmNBZ-ow	UCMYTIyqS1-7wT-3pBB8bR5A	3	true
UCBx_CluVFNvy0TXsmNBZ-ow	UC9zqTTVeClpqMQ5CLuJdWtw	2	true
UCBx_CluVFNvy0TXsmNBZ-ow	UC8IbAhPglJ1OeC44A_Gtmqg	1	true
UCBx_CluVFNvy0TXsmNBZ-ow	UCL41BsrnhsSSXG4zYwqC95g	1	true
UCBx_CluVFNvy0TXsmNBZ-ow	UCN-opsqqDunWO6h5uCp9Y4g	1	true
UCBx_CluVFNvy0TXsmNBZ-ow	UCDtVoSwSwQgwhcC89Nlz5Vg	3	true
UCBx_CluVFNvy0TXsmNBZ-ow	UCNjPniJ9bZuCDQXCRqNsCBQ	1	true
UCBx_CluVFNvy0TXsmNBZ-ow	UCxucJ9P3mLMneYypLZYn2uw	2	true
UCBx_CluVFNvy0TXsmNBZ-ow	UCmpHPgeCBgvk_fDXZQKsnAA	1	true
UCBx_CluVFNvy0TXsmNBZ-ow	UCI2EhvTADDdOex2nBIRsigw	1	true
UCBx_CluVFNvy0TXsmNBZ-ow	UC_er6_R1PKUCxc7QSXxIvzw	1	true
UCBx_CluVFNvy0TXsmNBZ-ow	UCGfBE94turq_hyKMxB-Dfrg	1	true
UCBx_CluVFNvy0TXsmNBZ-ow	UCqZN-NqgP7bhbctbyThSVUA	1	true
UCBx_CluVFNvy0TXsmNBZ-ow	UC1RnMyP-HfZCyMLX0TmyMTg	1	true
UCBx_CluVFNvy0TXsmNBZ-ow	UCvNbTU5NSQ_K8cWfY9OmWsw	1	true
UCBx_CluVFNvy0TXsmNBZ-ow	UCv2svvDbMNunUuPs8hUUKVA	1	true
UCBx_CluVFNvy0TXsmNBZ-ow	UCPU9R4M0Fruz-E2Vo9KEmAQ	1	true
UCBx_CluVFNvy0TXsmNBZ-ow	UCjaWLFTNqLkq3ZY2BJ4NYRg	2	true
UCBx_CluVFNvy0TXsmNBZ-ow	UC12zKGLhMhDeDidoctM6BrA	1	true
UCBx_CluVFNvy0TXsmNBZ-ow	UCXLe20604d4XVV_Z6cQc-gg	1	true
UCBx_CluVFNvy0TXsmNBZ-ow	UCkke64Kird1ZcZsPJEo_hYg	2	true
UCBx_CluVFNvy0TXsmNBZ-ow	UCP391YRAjSOdM_bwievgaZA	1	true
UCBx_CluVFNvy0TXsmNBZ-ow	UChHd-MU2mOvZHmBQz6zJw_w	1	true
UCBx_CluVFNvy0TXsmNBZ-ow	UCq8ChnGCYMVCzDgGMK9e91A	1	true
UCBx_CluVFNvy0TXsmNBZ-ow	UCm-XT_NupkfP-19ZE8QJACA	1	true
UCBx_CluVFNvy0TXsmNBZ-ow	UC9gmqJKNBOyCl2KLdJIv0mQ	1	true
UCBx_CluVFNvy0TXsmNBZ-ow	UCr9Jv4BCx_EZ3-RiuYwQXqg	1	true
UCBx_CluVFNvy0TXsmNBZ-ow	UCLWEHMfQsBVlIEQicwXtb1w	1	true
UCBx_CluVFNvy0TXsmNBZ-ow	UC19aAr6UojQesIVCBsXJGIw	1	true
UCBx_CluVFNvy0TXsmNBZ-ow	UCOX1xjMcnZVmV-yx0VC6Fvg	1	true
UCBx_CluVFNvy0TXsmNBZ-ow	UCvi6qsQ6iqHWDph-ckhX5GQ	1	true
UCBx_CluVFNvy0TXsmNBZ-ow	UCN9eb1Z__4hietbXmwxOglw	2	true
UCVqS-HRwe2vq_Jjgu4fg-UA	UCP-Vg2PcmLiWpEdvMI1R35w	1	true
UCVqS-HRwe2vq_Jjgu4fg-UA	UCVqS-HRwe2vq_Jjgu4fg-UA	519	true
UCVqS-HRwe2vq_Jjgu4fg-UA	UCA2llkURdTm63bBB3nTBw1w	2	true
UCVqS-HRwe2vq_Jjgu4fg-UA	UCgDb_6JF3elI2CFR9SqSbwA	3	true
UCVqS-HRwe2vq_Jjgu4fg-UA	UC42k7FI53tnSSIjgzW-rbLA	3	true
UCVqS-HRwe2vq_Jjgu4fg-UA	UCA1nC2t2zfzBOySscmpIzGQ	4	true
UCVqS-HRwe2vq_Jjgu4fg-UA	UCfIlLA5vyrS8PgzSOKE2GBw	19	true
UCVqS-HRwe2vq_Jjgu4fg-UA	UC5eWe0ULMB-T72sAL5ybArg	2	true
UCVqS-HRwe2vq_Jjgu4fg-UA	UCFiEI1kDHlO9UQtxx0wj-XA	1	true
UCVqS-HRwe2vq_Jjgu4fg-UA	UC81fUuO3oGR-ju7tEAuyNPA	2	true
UCVqS-HRwe2vq_Jjgu4fg-UA	UCFbx6QBTcDI6toOnO-EyajQ	6	true
UCVqS-HRwe2vq_Jjgu4fg-UA	UC33LTYvNoNvpx7D5qezhxew	1	true
UCVqS-HRwe2vq_Jjgu4fg-UA	UCPCwZ6sP0cAwgMsGZ23rOYA	2	true
UCVqS-HRwe2vq_Jjgu4fg-UA	UCgfgPyU5Vc4s1tyBSM6CCvw	1	true
UCVqS-HRwe2vq_Jjgu4fg-UA	UCPGGSQfN8LREy6dWdk85fpw	3	true
UCVqS-HRwe2vq_Jjgu4fg-UA	UCz1xVDltULzUhZCJ1TkvnTQ	1	true
UCVqS-HRwe2vq_Jjgu4fg-UA	UCuAaB8lLRmoZzOrc_d_Ka0A	1	true
UCVqS-HRwe2vq_Jjgu4fg-UA	UClGVPnkZ62SuUbE4EqTDIYg	4	true
UCVqS-HRwe2vq_Jjgu4fg-UA	UCbhT_vtlwr7X2wG6q_0mWVQ	2	true
UCVqS-HRwe2vq_Jjgu4fg-UA	UCHyeOQ0-Td0Dv3xfI0dwu3g	1	true
UCVqS-HRwe2vq_Jjgu4fg-UA	UC3lP5c55UE0ozG-uN0uBsXg	2	true
UCVqS-HRwe2vq_Jjgu4fg-UA	UCuFi5ZBiy2IgvwVRRhsazQA	1	true
UCVqS-HRwe2vq_Jjgu4fg-UA	UCcpEuvf0WL27bLso2tK1DLQ	1	true
UCVqS-HRwe2vq_Jjgu4fg-UA	UCMMJm4lYxEh7GM4loYh6-SQ	1	true
UCVqS-HRwe2vq_Jjgu4fg-UA	UClN6OLbLp1YjTSwDOkEM2dA	20	true
UCVqS-HRwe2vq_Jjgu4fg-UA	UC4_WOkaSB6TMFad-v0T6qmg	1	true
UCVqS-HRwe2vq_Jjgu4fg-UA	UC9Xzfea9PyVFl_jmbKVuxAg	1	true
UCVqS-HRwe2vq_Jjgu4fg-UA	UCzDQaYfHMJrXfw46whk6hIg	3	true
UCVqS-HRwe2vq_Jjgu4fg-UA	UCewz-5dLWu_rswIMStBBI1Q	1	true
UCVqS-HRwe2vq_Jjgu4fg-UA	UCAcm_kK9LeKsqntNX_5J9Rg	1	true
UCVqS-HRwe2vq_Jjgu4fg-UA	UCvLNnnIZdqXYqAS-l8FLJFw	1	true
UCVqS-HRwe2vq_Jjgu4fg-UA	UCZMequcevIbkS-_LLAizS1w	1	true
UCVqS-HRwe2vq_Jjgu4fg-UA	UCoPDcjdXmHCFyW7Pz9DBCOQ	1	true
UCVqS-HRwe2vq_Jjgu4fg-UA	UCdKg0aioEqn_tbfBGz_ltFw	2	true
UCVqS-HRwe2vq_Jjgu4fg-UA	UC4F32QLrpDmmRrozxr9z59g	23	true
UCtym0q5w1NeYqVjzSwRntgQ	UCmQK52xYtdeg7EYiQhqEeZA	1	true
UCtym0q5w1NeYqVjzSwRntgQ	UCuAaB8lLRmoZzOrc_d_Ka0A	1	true
UCtym0q5w1NeYqVjzSwRntgQ	UCG-eghyORxNrzSG8FkAWKyw	1	true
UCtym0q5w1NeYqVjzSwRntgQ	UCFiEI1kDHlO9UQtxx0wj-XA	2	true
UCtym0q5w1NeYqVjzSwRntgQ	UCwobzUc3z-0PrFpoRxNszXQ	1	true
UCtym0q5w1NeYqVjzSwRntgQ	UCnyFZr3wJBAJRjcqr_Q5Gug	1	true
UCtym0q5w1NeYqVjzSwRntgQ	UC0Q3GfF9amdyyjTA9DpTnyw	1	true
UCtym0q5w1NeYqVjzSwRntgQ	UCFbx6QBTcDI6toOnO-EyajQ	2	true
UCtym0q5w1NeYqVjzSwRntgQ	UC8Ciiz3QHgziGJXa4BPY7sQ	1	true
UCtym0q5w1NeYqVjzSwRntgQ	UCXdXYG8dUmEv6jhEji_lSHg	1	true
UCtym0q5w1NeYqVjzSwRntgQ	UCC1_Drela_P4MAW8pPcdjSw	1	true
UCtym0q5w1NeYqVjzSwRntgQ	UCXj2oSzwg6G0iBjKg33joMQ	1	true
UCtym0q5w1NeYqVjzSwRntgQ	UCSFQIz7KvEWSwuCCh_zh_0Q	1	true
UCtym0q5w1NeYqVjzSwRntgQ	UCg3fYev0mdtUvJvFJpQUM8g	1	true
UCtym0q5w1NeYqVjzSwRntgQ	UCY3bccBm-_J8m0-SQz2AbAg	1	true
UCtym0q5w1NeYqVjzSwRntgQ	UCIQPHl1WKKTt9KkWyo_JNig	1	true
UCtym0q5w1NeYqVjzSwRntgQ	UCuSEQ1Ebc3lS5FrwGKpbtkA	1	true
UCtym0q5w1NeYqVjzSwRntgQ	UCEKBa8byszeoA0f7lt1ledg	1	true
UCtym0q5w1NeYqVjzSwRntgQ	UCeoHCxOOPTeT9Pp_qi8HmHg	1	true
UCtym0q5w1NeYqVjzSwRntgQ	UCCUJDced0JrM5EmfdnhuRJw	1	true
UCtym0q5w1NeYqVjzSwRntgQ	UC1VlEIPGhDqaUsL7Vg__hHA	1	true
UCtym0q5w1NeYqVjzSwRntgQ	UC12zKGLhMhDeDidoctM6BrA	1	true
UCtym0q5w1NeYqVjzSwRntgQ	UC3O9y5JRSBqn4YhCEvBys_Q	1	true
UCtym0q5w1NeYqVjzSwRntgQ	UClu474HMt895mVxZdlIHXEA	1	true
UCtym0q5w1NeYqVjzSwRntgQ	UCcnuou4Sjm-qF87yzWve1ug	1	true
UCtym0q5w1NeYqVjzSwRntgQ	UCR9EXU15wObpFMDyQmHXeuw	1	true
UCtym0q5w1NeYqVjzSwRntgQ	UCdKJlY5eAoSumIlcOcYxIGg	1	true
UCtym0q5w1NeYqVjzSwRntgQ	UCeDX3cRwyEND1InTK4Iod2g	1	true
UCtym0q5w1NeYqVjzSwRntgQ	UCeGhoo58OOV262hAkG2eBnQ	1	true
UCtym0q5w1NeYqVjzSwRntgQ	UCsgHWN8lYveMUEWTDheTjZA	1	true
UCtym0q5w1NeYqVjzSwRntgQ	UCemIxU4HzIhVLeohT7eUUoA	1	true
UCtym0q5w1NeYqVjzSwRntgQ	UCNy6EtpfR05_vGNPkb-xQBA	1	true
UCtym0q5w1NeYqVjzSwRntgQ	UCl4jPGdW6YDo-1KgU5q8T1g	1	true
UCtym0q5w1NeYqVjzSwRntgQ	UC3Ooj_iDWELBumIEDejyNHQ	1	true
UCtym0q5w1NeYqVjzSwRntgQ	UCo9oJoBqutAtWI5Jb-_EQWQ	1	true
UCtym0q5w1NeYqVjzSwRntgQ	UCa1o8yRux22rDwRbEjokSPg	1	true
UCtym0q5w1NeYqVjzSwRntgQ	UCfEQnRUpLwlf85pcXBukT_A	1	true
UCtym0q5w1NeYqVjzSwRntgQ	UCWq1xltHB2fDe6YkYoOrryg	1	true
UCtym0q5w1NeYqVjzSwRntgQ	UCwQhAc44SfDvhdCQiHluBVQ	1	true
UCtym0q5w1NeYqVjzSwRntgQ	UC-RhfF4_tepYCgSZuGLSzpw	1	true
UCtym0q5w1NeYqVjzSwRntgQ	UCGKQmZBLf_233edf8XzteqQ	1	true
UCtym0q5w1NeYqVjzSwRntgQ	UC-v1PJRoid6DGFzY1jVU3hg	1	true
UCtym0q5w1NeYqVjzSwRntgQ	UC1_-z9fMYofIUQWYUPoNyTw	1	true
UCtym0q5w1NeYqVjzSwRntgQ	UCvLNnnIZdqXYqAS-l8FLJFw	1	true
UCtym0q5w1NeYqVjzSwRntgQ	UC3vZWDAhX5356m17Vy1B2GA	1	true
UCgbbjw8zPkrmmL_XU1SgJBg	UCW4t6ozY9VDVeN_GHK260BQ	2	true
UCgbbjw8zPkrmmL_XU1SgJBg	UC4zG6UeNUn-HM6UEFFkiESA	3	true
UCgbbjw8zPkrmmL_XU1SgJBg	UCG-eghyORxNrzSG8FkAWKyw	5	true
UCgbbjw8zPkrmmL_XU1SgJBg	UChHd-MU2mOvZHmBQz6zJw_w	1	true
UCgbbjw8zPkrmmL_XU1SgJBg	UCgbbjw8zPkrmmL_XU1SgJBg	121	true
UCgbbjw8zPkrmmL_XU1SgJBg	UC5Bh3Ljo71O9uML6paQVAfQ	1	true
UCgbbjw8zPkrmmL_XU1SgJBg	UCKtJs_zI1yzswHDWqkqHtWw	1	true
UCgbbjw8zPkrmmL_XU1SgJBg	UCB0zinWfy-dS_NqcOINYo3A	1	true
UCgbbjw8zPkrmmL_XU1SgJBg	UC9zqTTVeClpqMQ5CLuJdWtw	5	true
UCgbbjw8zPkrmmL_XU1SgJBg	UCxt_nr6Xwbq4O2Ur9ZBpgAA	1	true
UCgbbjw8zPkrmmL_XU1SgJBg	UCXj2oSzwg6G0iBjKg33joMQ	2	true
UCgbbjw8zPkrmmL_XU1SgJBg	UCMYTIyqS1-7wT-3pBB8bR5A	1	true
UCgbbjw8zPkrmmL_XU1SgJBg	UCN-opsqqDunWO6h5uCp9Y4g	1	true
UCgbbjw8zPkrmmL_XU1SgJBg	UCHyeOQ0-Td0Dv3xfI0dwu3g	1	true
UCgbbjw8zPkrmmL_XU1SgJBg	UCFbx6QBTcDI6toOnO-EyajQ	4	true
UCgbbjw8zPkrmmL_XU1SgJBg	UCe1XNXkGImWSq5n4wkzNjBw	3	true
UCgbbjw8zPkrmmL_XU1SgJBg	UCuAaB8lLRmoZzOrc_d_Ka0A	1	true
UCgbbjw8zPkrmmL_XU1SgJBg	UCP391YRAjSOdM_bwievgaZA	1	true
UCgbbjw8zPkrmmL_XU1SgJBg	UCMMJm4lYxEh7GM4loYh6-SQ	1	true
UCgbbjw8zPkrmmL_XU1SgJBg	UCGfBE94turq_hyKMxB-Dfrg	1	true
UCgbbjw8zPkrmmL_XU1SgJBg	UCH2VZQBLFTOp6I_qgnBJCuQ	1	true
UCgbbjw8zPkrmmL_XU1SgJBg	UCq8ChnGCYMVCzDgGMK9e91A	3	true
UCgbbjw8zPkrmmL_XU1SgJBg	UCjVPaRkoIgq_Whb1QkJjGKg	1	true
UCgbbjw8zPkrmmL_XU1SgJBg	UCPR3gVNYBzi-02_O4noC1Zg	2	true
UCgbbjw8zPkrmmL_XU1SgJBg	UCuiLR4p6wQ3xLEm15pEn1Xw	1	true
UCgbbjw8zPkrmmL_XU1SgJBg	UC3Ooj_iDWELBumIEDejyNHQ	1	true
UCgbbjw8zPkrmmL_XU1SgJBg	UC3UMFl4FxufRp6YErllpxHQ	1	true
UCgbbjw8zPkrmmL_XU1SgJBg	UC12zKGLhMhDeDidoctM6BrA	3	true
UCgbbjw8zPkrmmL_XU1SgJBg	UC8IbAhPglJ1OeC44A_Gtmqg	1	true
UCgbbjw8zPkrmmL_XU1SgJBg	UC42k7FI53tnSSIjgzW-rbLA	1	true
UCgbbjw8zPkrmmL_XU1SgJBg	UCa1o8yRux22rDwRbEjokSPg	1	true
UCgbbjw8zPkrmmL_XU1SgJBg	UCZ4wREznHPRuUz-ghmp7KGw	1	true
UCgbbjw8zPkrmmL_XU1SgJBg	UCsCeWWW8sk8zDaPzw6Ll67g	1	true
UCgbbjw8zPkrmmL_XU1SgJBg	UCnNvQI_yyWPZGI-rqFhR17Q	1	true
UCgbbjw8zPkrmmL_XU1SgJBg	UCWq1xltHB2fDe6YkYoOrryg	2	true
UCgbbjw8zPkrmmL_XU1SgJBg	UCz84Tivi_d214XXnxGbtKHQ	1	true
UCgbbjw8zPkrmmL_XU1SgJBg	UC4F32QLrpDmmRrozxr9z59g	2	true
UCgbbjw8zPkrmmL_XU1SgJBg	UCwQhAc44SfDvhdCQiHluBVQ	2	true
UCgbbjw8zPkrmmL_XU1SgJBg	UChXNyp6dL_aY_3qwVgDd-EQ	1	true
UCgbbjw8zPkrmmL_XU1SgJBg	UCvLNnnIZdqXYqAS-l8FLJFw	1	true
UCgbbjw8zPkrmmL_XU1SgJBg	UCDoPuIvx88nh69fS5VJCNWg	1	true
UCgbbjw8zPkrmmL_XU1SgJBg	UC3vZWDAhX5356m17Vy1B2GA	1	true
UCnNvQI_yyWPZGI-rqFhR17Q	UCG-eghyORxNrzSG8FkAWKyw	2	true
UCnNvQI_yyWPZGI-rqFhR17Q	UC42k7FI53tnSSIjgzW-rbLA	1	true
UCnNvQI_yyWPZGI-rqFhR17Q	UCuAaB8lLRmoZzOrc_d_Ka0A	1	true
UCnNvQI_yyWPZGI-rqFhR17Q	UC9zqTTVeClpqMQ5CLuJdWtw	1	true
UCnNvQI_yyWPZGI-rqFhR17Q	UCjaWLFTNqLkq3ZY2BJ4NYRg	1	true
UCnNvQI_yyWPZGI-rqFhR17Q	UCMYTIyqS1-7wT-3pBB8bR5A	1	true
UCnNvQI_yyWPZGI-rqFhR17Q	UCx7HKmnCIIbRBF2FjAoV0bg	1	true
UCnNvQI_yyWPZGI-rqFhR17Q	UCz1xVDltULzUhZCJ1TkvnTQ	2	true
UCnNvQI_yyWPZGI-rqFhR17Q	UCEWHPFNilsT0IfQfutVzsag	1	true
UCnNvQI_yyWPZGI-rqFhR17Q	UCHyeOQ0-Td0Dv3xfI0dwu3g	1	true
UCnNvQI_yyWPZGI-rqFhR17Q	UC3PLVO-mt6ZQLiySKdJedCA	1	true
UCnNvQI_yyWPZGI-rqFhR17Q	UCIQPHl1WKKTt9KkWyo_JNig	5	true
UCnNvQI_yyWPZGI-rqFhR17Q	UCGILPX9AE6hZpqp1FjFn6pw	1	true
UCnNvQI_yyWPZGI-rqFhR17Q	UC3lP5c55UE0ozG-uN0uBsXg	1	true
UCnNvQI_yyWPZGI-rqFhR17Q	UCB0zinWfy-dS_NqcOINYo3A	1	true
UCnNvQI_yyWPZGI-rqFhR17Q	UCnNvQI_yyWPZGI-rqFhR17Q	16	true
UCnNvQI_yyWPZGI-rqFhR17Q	UCT0ECF7TihWahDqpU2i9tQA	1	true
UCnNvQI_yyWPZGI-rqFhR17Q	UCV9EVCVbJus_StqIJ89ajLA	1	true
UCnNvQI_yyWPZGI-rqFhR17Q	UC6nYtmaMh43WUQW5YeopuNg	1	true
UCnNvQI_yyWPZGI-rqFhR17Q	UCV306eHqgo0LvBf3Mh36AHg	1	true
UCnNvQI_yyWPZGI-rqFhR17Q	UCH2VZQBLFTOp6I_qgnBJCuQ	1	true
UCnNvQI_yyWPZGI-rqFhR17Q	UCMMJm4lYxEh7GM4loYh6-SQ	1	true
UCnNvQI_yyWPZGI-rqFhR17Q	UC4_WOkaSB6TMFad-v0T6qmg	1	true
UCnNvQI_yyWPZGI-rqFhR17Q	UC3Ooj_iDWELBumIEDejyNHQ	1	true
UCnNvQI_yyWPZGI-rqFhR17Q	UCQq1CfzTvBRn3l4CYswnMcw	1	true
UCnNvQI_yyWPZGI-rqFhR17Q	UCsYo9r-JIEkhoRoc9G5gdpQ	1	true
UCnNvQI_yyWPZGI-rqFhR17Q	UCgbbjw8zPkrmmL_XU1SgJBg	1	true
UCnNvQI_yyWPZGI-rqFhR17Q	UCTFCMkTZPwi_PjerXYxDscA	1	true
UCnNvQI_yyWPZGI-rqFhR17Q	UCemIxU4HzIhVLeohT7eUUoA	1	true
UCnNvQI_yyWPZGI-rqFhR17Q	UCqZN-NqgP7bhbctbyThSVUA	1	true
UCnNvQI_yyWPZGI-rqFhR17Q	UC5ZXYxeWlROKbL7JziJ0bIQ	1	true
UCnNvQI_yyWPZGI-rqFhR17Q	UCjrmFzNfoXO-We5rT6jB4vg	1	true
UCnNvQI_yyWPZGI-rqFhR17Q	UCXTI4ER3d0UPT4WxFYI082w	1	true
UCnNvQI_yyWPZGI-rqFhR17Q	UCWX70TFNwDsBLYlRzOe_-zw	1	true
UCnNvQI_yyWPZGI-rqFhR17Q	UCWq1xltHB2fDe6YkYoOrryg	1	true
UCnNvQI_yyWPZGI-rqFhR17Q	UCT3P3oWIt21UsHi_wwDG8Yg	1	true
UCnNvQI_yyWPZGI-rqFhR17Q	UCJS-Vcf3aR_vEX5F7oPIqnA	1	true
UCnNvQI_yyWPZGI-rqFhR17Q	UCe1XNXkGImWSq5n4wkzNjBw	1	true
UCnNvQI_yyWPZGI-rqFhR17Q	UCOqOdxzU58qOGoysdnVXd9Q	1	true
UCnNvQI_yyWPZGI-rqFhR17Q	UCwVmZjJwkCUCOes5_eAIebg	1	true
UCnNvQI_yyWPZGI-rqFhR17Q	UCvLNnnIZdqXYqAS-l8FLJFw	1	true
UC9fxSdFjcz5QWDEhYCk_k1w	UC4zG6UeNUn-HM6UEFFkiESA	2	true
UC9fxSdFjcz5QWDEhYCk_k1w	UC9fxSdFjcz5QWDEhYCk_k1w	302	true
UC9fxSdFjcz5QWDEhYCk_k1w	UC9zqTTVeClpqMQ5CLuJdWtw	3	true
UC9fxSdFjcz5QWDEhYCk_k1w	UCPR3gVNYBzi-02_O4noC1Zg	2	true
UC9fxSdFjcz5QWDEhYCk_k1w	UCP391YRAjSOdM_bwievgaZA	1	true
UC9fxSdFjcz5QWDEhYCk_k1w	UCKtJs_zI1yzswHDWqkqHtWw	1	true
UC9fxSdFjcz5QWDEhYCk_k1w	UC_53VGoH_0XLFmYVpGMvhvg	1	true
UC9fxSdFjcz5QWDEhYCk_k1w	UC8IbAhPglJ1OeC44A_Gtmqg	2	true
UC9fxSdFjcz5QWDEhYCk_k1w	UCA6Roeo-qFVk3jvjAdag7Uw	1	true
UC9fxSdFjcz5QWDEhYCk_k1w	UCQdOZmbeT9UoQy8G3zeNE-g	1	true
UC9fxSdFjcz5QWDEhYCk_k1w	UCXj2oSzwg6G0iBjKg33joMQ	1	true
UC9fxSdFjcz5QWDEhYCk_k1w	UCG-eghyORxNrzSG8FkAWKyw	1	true
UC9fxSdFjcz5QWDEhYCk_k1w	UCxt_nr6Xwbq4O2Ur9ZBpgAA	1	true
UC9fxSdFjcz5QWDEhYCk_k1w	UCxucJ9P3mLMneYypLZYn2uw	1	true
UC9fxSdFjcz5QWDEhYCk_k1w	UC12zKGLhMhDeDidoctM6BrA	1	true
UC9fxSdFjcz5QWDEhYCk_k1w	UC3O9y5JRSBqn4YhCEvBys_Q	1	true
UC9fxSdFjcz5QWDEhYCk_k1w	UCGfBE94turq_hyKMxB-Dfrg	1	true
UC9fxSdFjcz5QWDEhYCk_k1w	UCN-opsqqDunWO6h5uCp9Y4g	1	true
UC9fxSdFjcz5QWDEhYCk_k1w	UCHyeOQ0-Td0Dv3xfI0dwu3g	1	true
UC9fxSdFjcz5QWDEhYCk_k1w	UCUp-GSUuNxSZ7cxOg7ZnyqA	1	true
UC9fxSdFjcz5QWDEhYCk_k1w	UCuAaB8lLRmoZzOrc_d_Ka0A	1	true
UC9fxSdFjcz5QWDEhYCk_k1w	UCPaL0Om2geEJyjncqTGm49A	1	true
UC9fxSdFjcz5QWDEhYCk_k1w	UCOX1xjMcnZVmV-yx0VC6Fvg	1	true
UC9fxSdFjcz5QWDEhYCk_k1w	UClN6OLbLp1YjTSwDOkEM2dA	1	true
UC9fxSdFjcz5QWDEhYCk_k1w	UCgbbjw8zPkrmmL_XU1SgJBg	1	true
UC9fxSdFjcz5QWDEhYCk_k1w	UC5lg8zKcnJ1rnxR6lPgD1ug	1	true
UC9fxSdFjcz5QWDEhYCk_k1w	UCORRcj9wv5DEYCEg2LhBcLQ	1	true
UC9fxSdFjcz5QWDEhYCk_k1w	UC0LDNBjI8prPXedEj3QosOQ	1	true
UC9fxSdFjcz5QWDEhYCk_k1w	UCqZN-NqgP7bhbctbyThSVUA	1	true
UC9fxSdFjcz5QWDEhYCk_k1w	UCtzbjh-OJFkaHqSjvWJs87g	1	true
UC9fxSdFjcz5QWDEhYCk_k1w	UCMMJm4lYxEh7GM4loYh6-SQ	1	true
UC9fxSdFjcz5QWDEhYCk_k1w	UC3Ooj_iDWELBumIEDejyNHQ	1	true
UC9fxSdFjcz5QWDEhYCk_k1w	UCxbqmMsXory_zC-kNqKHUgw	1	true
UC9fxSdFjcz5QWDEhYCk_k1w	UCwVmZjJwkCUCOes5_eAIebg	1	true
UCl1eRuftjRdetdWkrbeDBGg	UCP-Vg2PcmLiWpEdvMI1R35w	2	true
UCl1eRuftjRdetdWkrbeDBGg	UCl1eRuftjRdetdWkrbeDBGg	50	true
UCl1eRuftjRdetdWkrbeDBGg	UCoC9FjH7GgWoPIYfr8sEJdQ	1	true
UCl1eRuftjRdetdWkrbeDBGg	UCNl_i-ggJbZNyOLlhE7yyhw	1	true
UCl1eRuftjRdetdWkrbeDBGg	UCqZN-NqgP7bhbctbyThSVUA	1	true
UCl1eRuftjRdetdWkrbeDBGg	UClbjlUoxxs-Lc7V7tNVa8CQ	1	true
UCl1eRuftjRdetdWkrbeDBGg	UC4zG6UeNUn-HM6UEFFkiESA	1	true
UCl1eRuftjRdetdWkrbeDBGg	UC9zqTTVeClpqMQ5CLuJdWtw	4	true
UCl1eRuftjRdetdWkrbeDBGg	UCxucJ9P3mLMneYypLZYn2uw	1	true
UCl1eRuftjRdetdWkrbeDBGg	UCjaWLFTNqLkq3ZY2BJ4NYRg	1	true
UCl1eRuftjRdetdWkrbeDBGg	UCthbIFAxbXTTQEC7EcQvP1Q	1	true
UCl1eRuftjRdetdWkrbeDBGg	UChHd-MU2mOvZHmBQz6zJw_w	2	true
UCl1eRuftjRdetdWkrbeDBGg	UCG-eghyORxNrzSG8FkAWKyw	2	true
UCl1eRuftjRdetdWkrbeDBGg	UCUp-GSUuNxSZ7cxOg7ZnyqA	1	true
UCl1eRuftjRdetdWkrbeDBGg	UC12zKGLhMhDeDidoctM6BrA	3	true
UCl1eRuftjRdetdWkrbeDBGg	UCMYTIyqS1-7wT-3pBB8bR5A	2	true
UCl1eRuftjRdetdWkrbeDBGg	UCORRcj9wv5DEYCEg2LhBcLQ	1	true
UCl1eRuftjRdetdWkrbeDBGg	UCv2svvDbMNunUuPs8hUUKVA	1	true
UCl1eRuftjRdetdWkrbeDBGg	UCXj2oSzwg6G0iBjKg33joMQ	1	true
UCl1eRuftjRdetdWkrbeDBGg	UCoa-D_VfMkFrCYodrOC9-mA	1	true
UCl1eRuftjRdetdWkrbeDBGg	UCTrx5uG9vJjTLloAH8hE-pg	1	true
UCl1eRuftjRdetdWkrbeDBGg	UCdKJlY5eAoSumIlcOcYxIGg	1	true
UCl1eRuftjRdetdWkrbeDBGg	UC2visps0yULA5lnn5Yjne9w	1	true
UCl1eRuftjRdetdWkrbeDBGg	UCN-opsqqDunWO6h5uCp9Y4g	1	true
UCl1eRuftjRdetdWkrbeDBGg	UCg3fYev0mdtUvJvFJpQUM8g	2	true
UCl1eRuftjRdetdWkrbeDBGg	UCH2VZQBLFTOp6I_qgnBJCuQ	1	true
UCl1eRuftjRdetdWkrbeDBGg	UCVVIVc6DfU8uWJ60vk8iKpQ	1	true
UCl1eRuftjRdetdWkrbeDBGg	UCPR3gVNYBzi-02_O4noC1Zg	1	true
UCl1eRuftjRdetdWkrbeDBGg	UCGfBE94turq_hyKMxB-Dfrg	1	true
UCl1eRuftjRdetdWkrbeDBGg	UCw8ZXVXrAyNTdvzKH6HMhmg	1	true
UCl1eRuftjRdetdWkrbeDBGg	UCyvhqROV3luJvtt2dLTFhAA	1	true
UCl1eRuftjRdetdWkrbeDBGg	UCq8ChnGCYMVCzDgGMK9e91A	1	true
UCl1eRuftjRdetdWkrbeDBGg	UChFIPDFYjTFg03eWlwmQcTA	1	true
UCl1eRuftjRdetdWkrbeDBGg	UCuAaB8lLRmoZzOrc_d_Ka0A	1	true
UCl1eRuftjRdetdWkrbeDBGg	UCVrKQMmA2ew9LFzeIDaOFgw	1	true
UCl1eRuftjRdetdWkrbeDBGg	UCHyeOQ0-Td0Dv3xfI0dwu3g	1	true
UCl1eRuftjRdetdWkrbeDBGg	UC-6_6nA-v9W057U5sX3tTXg	1	true
UCl1eRuftjRdetdWkrbeDBGg	UCa1o8yRux22rDwRbEjokSPg	1	true
UCl1eRuftjRdetdWkrbeDBGg	UCwQhAc44SfDvhdCQiHluBVQ	1	true
UCl1eRuftjRdetdWkrbeDBGg	UCdRdaVD3_JxbG7R4c9tembQ	1	true
UCvLNnnIZdqXYqAS-l8FLJFw	UCmpHPgeCBgvk_fDXZQKsnAA	1	true
UCvLNnnIZdqXYqAS-l8FLJFw	UCMYTIyqS1-7wT-3pBB8bR5A	2	true
UCvLNnnIZdqXYqAS-l8FLJFw	UCamgdcs45ToPrIV7wmT7iYg	1	true
UCvLNnnIZdqXYqAS-l8FLJFw	UCG-eghyORxNrzSG8FkAWKyw	1	true
UCvLNnnIZdqXYqAS-l8FLJFw	UCPR3gVNYBzi-02_O4noC1Zg	3	true
UCvLNnnIZdqXYqAS-l8FLJFw	UCWeDz9iYFe7APda1DFMHLtw	1	true
UCvLNnnIZdqXYqAS-l8FLJFw	UCV6Ue4o5UIeKQ3IEkjnXRlg	1	true
UCvLNnnIZdqXYqAS-l8FLJFw	UC12zKGLhMhDeDidoctM6BrA	3	true
UCvLNnnIZdqXYqAS-l8FLJFw	UC5Bh3Ljo71O9uML6paQVAfQ	1	true
UCvLNnnIZdqXYqAS-l8FLJFw	UC9zqTTVeClpqMQ5CLuJdWtw	1	true
UCvLNnnIZdqXYqAS-l8FLJFw	UCKtJs_zI1yzswHDWqkqHtWw	1	true
UCvLNnnIZdqXYqAS-l8FLJFw	UCxt_nr6Xwbq4O2Ur9ZBpgAA	1	true
UCvLNnnIZdqXYqAS-l8FLJFw	UCORRcj9wv5DEYCEg2LhBcLQ	1	true
UCvLNnnIZdqXYqAS-l8FLJFw	UCGfBE94turq_hyKMxB-Dfrg	1	true
UCvLNnnIZdqXYqAS-l8FLJFw	UCuAaB8lLRmoZzOrc_d_Ka0A	1	true
UCvLNnnIZdqXYqAS-l8FLJFw	UCxm7PwK74oVJtyP0vN2qQIw	1	true
UCvLNnnIZdqXYqAS-l8FLJFw	UCvLNnnIZdqXYqAS-l8FLJFw	2	true
UCvLNnnIZdqXYqAS-l8FLJFw	UC1VlEIPGhDqaUsL7Vg__hHA	1	true
UCvLNnnIZdqXYqAS-l8FLJFw	UCGILPX9AE6hZpqp1FjFn6pw	1	true
UCvLNnnIZdqXYqAS-l8FLJFw	UCgbbjw8zPkrmmL_XU1SgJBg	2	true
UCvLNnnIZdqXYqAS-l8FLJFw	UCHyeOQ0-Td0Dv3xfI0dwu3g	1	true
UCvLNnnIZdqXYqAS-l8FLJFw	UCZmc8QllMtE-fr51p1niyjw	1	true
UCvLNnnIZdqXYqAS-l8FLJFw	UC0LDNBjI8prPXedEj3QosOQ	1	true
UCvLNnnIZdqXYqAS-l8FLJFw	UCrSM1UV_KLAdTzgxyxl3POw	1	true
UCvLNnnIZdqXYqAS-l8FLJFw	UCNX-i6w11LltMBn66PacOfQ	1	true
UCvLNnnIZdqXYqAS-l8FLJFw	UC3Ooj_iDWELBumIEDejyNHQ	1	true
UCvLNnnIZdqXYqAS-l8FLJFw	UCxjXoEYzVFwvKD53-gvxhYQ	1	true
UCvLNnnIZdqXYqAS-l8FLJFw	UCe1XNXkGImWSq5n4wkzNjBw	2	true
UCvLNnnIZdqXYqAS-l8FLJFw	UCmOqIaUBwlSK6lVGC2o46JA	1	true
UCvLNnnIZdqXYqAS-l8FLJFw	UCH2VZQBLFTOp6I_qgnBJCuQ	1	true
UCvLNnnIZdqXYqAS-l8FLJFw	UCxbqmMsXory_zC-kNqKHUgw	1	true
UCvLNnnIZdqXYqAS-l8FLJFw	UCMMJm4lYxEh7GM4loYh6-SQ	1	true
UCvLNnnIZdqXYqAS-l8FLJFw	UCnNvQI_yyWPZGI-rqFhR17Q	1	true
UCvLNnnIZdqXYqAS-l8FLJFw	UCWX70TFNwDsBLYlRzOe_-zw	1	true
UCvLNnnIZdqXYqAS-l8FLJFw	UCWq1xltHB2fDe6YkYoOrryg	2	true
UCvLNnnIZdqXYqAS-l8FLJFw	UCfRVh-QaAzJ45hmNmlwT32g	1	true
UCvLNnnIZdqXYqAS-l8FLJFw	UC2mdv67uDPQO35IYkzK_Xzw	1	true
UCvLNnnIZdqXYqAS-l8FLJFw	UCa1o8yRux22rDwRbEjokSPg	1	true
UCvLNnnIZdqXYqAS-l8FLJFw	UCwQhAc44SfDvhdCQiHluBVQ	1	true
UCvLNnnIZdqXYqAS-l8FLJFw	UCoyhq57ClXRTd4h8vpiMelA	1	true
UCvLNnnIZdqXYqAS-l8FLJFw	UCvsvFTlOWSFU_RBinLDU7Ow	1	true
UCvLNnnIZdqXYqAS-l8FLJFw	UC4F32QLrpDmmRrozxr9z59g	1	true
UCf9lX9Vc4CWBUKQxVfZ6MtQ	UCW4t6ozY9VDVeN_GHK260BQ	1	true
UCf9lX9Vc4CWBUKQxVfZ6MtQ	UCUtDAMp91VCfHTZ9_ypKRPA	2	true
UCf9lX9Vc4CWBUKQxVfZ6MtQ	UCP-Vg2PcmLiWpEdvMI1R35w	2	true
UCf9lX9Vc4CWBUKQxVfZ6MtQ	UCFl00VTEDEA0cHCoMQ7CuZg	1	true
UCf9lX9Vc4CWBUKQxVfZ6MtQ	UC9zqTTVeClpqMQ5CLuJdWtw	2	true
UCf9lX9Vc4CWBUKQxVfZ6MtQ	UCoB_4Ec1pWpcf9mhyPfyvlw	1	true
UCf9lX9Vc4CWBUKQxVfZ6MtQ	UCuAaB8lLRmoZzOrc_d_Ka0A	3	true
UCf9lX9Vc4CWBUKQxVfZ6MtQ	UCf9lX9Vc4CWBUKQxVfZ6MtQ	1	true
UCf9lX9Vc4CWBUKQxVfZ6MtQ	UCPR3gVNYBzi-02_O4noC1Zg	1	true
UCf9lX9Vc4CWBUKQxVfZ6MtQ	UCghJZXv-Cg90zgdeTZCt_-A	1	true
UCf9lX9Vc4CWBUKQxVfZ6MtQ	UCA2llkURdTm63bBB3nTBw1w	1	true
UCf9lX9Vc4CWBUKQxVfZ6MtQ	UC2pQFYIrk5mg9x-LRM9TzYw	1	true
UCf9lX9Vc4CWBUKQxVfZ6MtQ	UCB0zinWfy-dS_NqcOINYo3A	1	true
UCf9lX9Vc4CWBUKQxVfZ6MtQ	UCtEEov46xWiYPdcJg-frWtg	1	true
UCf9lX9Vc4CWBUKQxVfZ6MtQ	UC3lP5c55UE0ozG-uN0uBsXg	2	true
UCf9lX9Vc4CWBUKQxVfZ6MtQ	UCH2VZQBLFTOp6I_qgnBJCuQ	1	true
UCf9lX9Vc4CWBUKQxVfZ6MtQ	UCk0U1Js-um2lRjSF3VoS_3A	1	true
UCf9lX9Vc4CWBUKQxVfZ6MtQ	UCUw7hCgpimep4N_oEmG7G4g	1	true
UCf9lX9Vc4CWBUKQxVfZ6MtQ	UCFbx6QBTcDI6toOnO-EyajQ	5	true
UCf9lX9Vc4CWBUKQxVfZ6MtQ	UCV5oxb6HtQR-ZptUGtnoPZA	1	true
UCf9lX9Vc4CWBUKQxVfZ6MtQ	UC42k7FI53tnSSIjgzW-rbLA	5	true
UCf9lX9Vc4CWBUKQxVfZ6MtQ	UCOFMoDHG-vKXs-f5vcG7JaQ	1	true
UCf9lX9Vc4CWBUKQxVfZ6MtQ	UCz1xVDltULzUhZCJ1TkvnTQ	1	true
UCf9lX9Vc4CWBUKQxVfZ6MtQ	UCXQHQFA87heyfElr-XajQPg	1	true
UCf9lX9Vc4CWBUKQxVfZ6MtQ	UCHyeOQ0-Td0Dv3xfI0dwu3g	1	true
UCf9lX9Vc4CWBUKQxVfZ6MtQ	UCjFAEaZfULixCSOCIvY9qNw	1	true
UCf9lX9Vc4CWBUKQxVfZ6MtQ	UC1r7Gt4v-OD8domIE0Vw2Zg	1	true
UCf9lX9Vc4CWBUKQxVfZ6MtQ	UC5ACo310tjp353abzLc6sVQ	1	true
UCf9lX9Vc4CWBUKQxVfZ6MtQ	UCTFCMkTZPwi_PjerXYxDscA	1	true
UCf9lX9Vc4CWBUKQxVfZ6MtQ	UCJl_ERzQBci1wgg3UdM1bVQ	1	true
UCf9lX9Vc4CWBUKQxVfZ6MtQ	UCoi5cG7JL_kZ-LGW6-PtZ_w	2	true
UCf9lX9Vc4CWBUKQxVfZ6MtQ	UCJIKKHplhnzcDmpztqUO7nA	1	true
UCf9lX9Vc4CWBUKQxVfZ6MtQ	UCbhT_vtlwr7X2wG6q_0mWVQ	1	true
UCf9lX9Vc4CWBUKQxVfZ6MtQ	UCl01kak5i66hCdS_bCxkkgA	1	true
UCf9lX9Vc4CWBUKQxVfZ6MtQ	UCMMJm4lYxEh7GM4loYh6-SQ	1	true
UCf9lX9Vc4CWBUKQxVfZ6MtQ	UCgbbjw8zPkrmmL_XU1SgJBg	1	true
UCf9lX9Vc4CWBUKQxVfZ6MtQ	UC3Ooj_iDWELBumIEDejyNHQ	1	true
UCf9lX9Vc4CWBUKQxVfZ6MtQ	UC9fxSdFjcz5QWDEhYCk_k1w	1	true
UCf9lX9Vc4CWBUKQxVfZ6MtQ	UC8p1vwvWtl6T73JiExfWs1g	1	true
UCf9lX9Vc4CWBUKQxVfZ6MtQ	UCyuDCBA1ig-x1YeAQBX2b4g	1	true
UCf9lX9Vc4CWBUKQxVfZ6MtQ	UCJglPPxxQQtFg-78dIkRqNg	1	true
UCf9lX9Vc4CWBUKQxVfZ6MtQ	UCWq1xltHB2fDe6YkYoOrryg	1	true
UCf9lX9Vc4CWBUKQxVfZ6MtQ	UCwVmZjJwkCUCOes5_eAIebg	1	true
UCGfBE94turq_hyKMxB-Dfrg	UC9zqTTVeClpqMQ5CLuJdWtw	3	true
UCGfBE94turq_hyKMxB-Dfrg	UC12zKGLhMhDeDidoctM6BrA	9	true
UCGfBE94turq_hyKMxB-Dfrg	UCxucJ9P3mLMneYypLZYn2uw	2	true
UCGfBE94turq_hyKMxB-Dfrg	UCv2svvDbMNunUuPs8hUUKVA	1	true
UCGfBE94turq_hyKMxB-Dfrg	UCTrx5uG9vJjTLloAH8hE-pg	2	true
UCGfBE94turq_hyKMxB-Dfrg	UCG-eghyORxNrzSG8FkAWKyw	1	true
UCGfBE94turq_hyKMxB-Dfrg	UCGfBE94turq_hyKMxB-Dfrg	16	true
UCGfBE94turq_hyKMxB-Dfrg	UCORRcj9wv5DEYCEg2LhBcLQ	1	true
UCGfBE94turq_hyKMxB-Dfrg	UCfYrK5JU5EznsnK3wQE7iIg	4	true
UCGfBE94turq_hyKMxB-Dfrg	UCKtJs_zI1yzswHDWqkqHtWw	1	true
UCGfBE94turq_hyKMxB-Dfrg	UC8IbAhPglJ1OeC44A_Gtmqg	3	true
UCGfBE94turq_hyKMxB-Dfrg	UCP391YRAjSOdM_bwievgaZA	3	true
UCGfBE94turq_hyKMxB-Dfrg	UCMYTIyqS1-7wT-3pBB8bR5A	2	true
UCGfBE94turq_hyKMxB-Dfrg	UCjaWLFTNqLkq3ZY2BJ4NYRg	2	true
UCGfBE94turq_hyKMxB-Dfrg	UCDtVoSwSwQgwhcC89Nlz5Vg	2	true
UCGfBE94turq_hyKMxB-Dfrg	UC4p7d_1KehpvAb7_9-WlkdA	1	true
UCGfBE94turq_hyKMxB-Dfrg	UCsPBsWBocgY1BxKS0FVca0g	1	true
UCGfBE94turq_hyKMxB-Dfrg	UCmpHPgeCBgvk_fDXZQKsnAA	2	true
UCGfBE94turq_hyKMxB-Dfrg	UCUtDAMp91VCfHTZ9_ypKRPA	2	true
UCGfBE94turq_hyKMxB-Dfrg	UC1Nm7gQCcGvgLyVcGTXp-Ww	1	true
UCGfBE94turq_hyKMxB-Dfrg	UCN-opsqqDunWO6h5uCp9Y4g	3	true
UCGfBE94turq_hyKMxB-Dfrg	UCvNbTU5NSQ_K8cWfY9OmWsw	1	true
UCGfBE94turq_hyKMxB-Dfrg	UCq8ChnGCYMVCzDgGMK9e91A	1	true
UCGfBE94turq_hyKMxB-Dfrg	UCPR3gVNYBzi-02_O4noC1Zg	2	true
UCGfBE94turq_hyKMxB-Dfrg	UCsgHWN8lYveMUEWTDheTjZA	1	true
UCGfBE94turq_hyKMxB-Dfrg	UCg3fYev0mdtUvJvFJpQUM8g	1	true
UCGfBE94turq_hyKMxB-Dfrg	UC1M8HoHfvAfBpNnkGoMxX1w	1	true
UCGfBE94turq_hyKMxB-Dfrg	UChHd-MU2mOvZHmBQz6zJw_w	1	true
UCGfBE94turq_hyKMxB-Dfrg	UCxt_nr6Xwbq4O2Ur9ZBpgAA	1	true
UCGfBE94turq_hyKMxB-Dfrg	UCVrKQMmA2ew9LFzeIDaOFgw	1	true
UCGfBE94turq_hyKMxB-Dfrg	UCqGCcfns6j4zlcAODLOeMDg	1	true
UCGfBE94turq_hyKMxB-Dfrg	UCR9EXU15wObpFMDyQmHXeuw	1	true
UCGfBE94turq_hyKMxB-Dfrg	UCL0sWgefmtjUNvtBafXQmhA	1	true
UCGfBE94turq_hyKMxB-Dfrg	UC_er6_R1PKUCxc7QSXxIvzw	2	true
UCGfBE94turq_hyKMxB-Dfrg	UCNa5CND4GBCDxwHFB51EAbw	1	true
UCGfBE94turq_hyKMxB-Dfrg	UCegeG7JEKeXThmcZ8BjtvsQ	1	true
UCGfBE94turq_hyKMxB-Dfrg	UCxbqmMsXory_zC-kNqKHUgw	1	true
UCGfBE94turq_hyKMxB-Dfrg	UCpvhFBKf_dacTd8NFRgcTxQ	1	true
UCGfBE94turq_hyKMxB-Dfrg	UCcRcXycIYgXJcxiur0pzLPg	1	true
UCGfBE94turq_hyKMxB-Dfrg	UC1xM1iuftFCqlZO-omXZesg	1	true
UCGfBE94turq_hyKMxB-Dfrg	UCIWKfj-9SxZetO6DVzDIlww	1	true
UCGfBE94turq_hyKMxB-Dfrg	UCAAqC3FgQfWxu_ui-1gynzQ	2	true
UC12zKGLhMhDeDidoctM6BrA	UC12zKGLhMhDeDidoctM6BrA	159	true
UC12zKGLhMhDeDidoctM6BrA	UCwHCkGOaMvG2kz7b-jhi2qA	1	true
UC12zKGLhMhDeDidoctM6BrA	UC_gV70G_Y51LTa3qhu8KiEA	1	true
UC12zKGLhMhDeDidoctM6BrA	UCLgti7NuK0RuW9wty-fxPjQ	2	true
UC12zKGLhMhDeDidoctM6BrA	UCW4t6ozY9VDVeN_GHK260BQ	3	true
UC12zKGLhMhDeDidoctM6BrA	UCL41BsrnhsSSXG4zYwqC95g	2	true
UC12zKGLhMhDeDidoctM6BrA	UCa-AC7YhCP5u5yO5aNjKjoA	1	true
UC12zKGLhMhDeDidoctM6BrA	UCxt_nr6Xwbq4O2Ur9ZBpgAA	4	true
UC12zKGLhMhDeDidoctM6BrA	UC_er6_R1PKUCxc7QSXxIvzw	8	true
UC12zKGLhMhDeDidoctM6BrA	UC9zqTTVeClpqMQ5CLuJdWtw	30	true
UC12zKGLhMhDeDidoctM6BrA	UCg3fYev0mdtUvJvFJpQUM8g	10	true
UC12zKGLhMhDeDidoctM6BrA	UCNjPniJ9bZuCDQXCRqNsCBQ	4	true
UC12zKGLhMhDeDidoctM6BrA	UCcs0knrjjReJHuF5lsBBbiw	1	true
UC12zKGLhMhDeDidoctM6BrA	UCl1eRuftjRdetdWkrbeDBGg	2	true
UC12zKGLhMhDeDidoctM6BrA	UCN-opsqqDunWO6h5uCp9Y4g	10	true
UC12zKGLhMhDeDidoctM6BrA	UCXj2oSzwg6G0iBjKg33joMQ	5	true
UC12zKGLhMhDeDidoctM6BrA	UCB9iWAdLYM9GzeKOaOBYH2Q	1	true
UC12zKGLhMhDeDidoctM6BrA	UCG-eghyORxNrzSG8FkAWKyw	18	true
UC12zKGLhMhDeDidoctM6BrA	UCXdXYG8dUmEv6jhEji_lSHg	1	true
UC12zKGLhMhDeDidoctM6BrA	UCGbDaS58FGh45Oq4N-Qfhdw	1	true
UC12zKGLhMhDeDidoctM6BrA	UCPR3gVNYBzi-02_O4noC1Zg	8	true
UC12zKGLhMhDeDidoctM6BrA	UCnQeN_JtknE5o6NHZeOMpXQ	1	true
UC12zKGLhMhDeDidoctM6BrA	UCjaWLFTNqLkq3ZY2BJ4NYRg	4	true
UC12zKGLhMhDeDidoctM6BrA	UCL3HlT99aQ1004ojA7u6ETQ	1	true
UC12zKGLhMhDeDidoctM6BrA	UCuAaB8lLRmoZzOrc_d_Ka0A	2	true
UC12zKGLhMhDeDidoctM6BrA	UCHyeOQ0-Td0Dv3xfI0dwu3g	2	true
UC12zKGLhMhDeDidoctM6BrA	UCwfEOn0O1DWcyTgzVVu28ig	1	true
UC12zKGLhMhDeDidoctM6BrA	UCQ1LWE9p0i3HxIpDZjiOKjg	2	true
UC12zKGLhMhDeDidoctM6BrA	UCuiLR4p6wQ3xLEm15pEn1Xw	8	true
UC12zKGLhMhDeDidoctM6BrA	UCH2VZQBLFTOp6I_qgnBJCuQ	9	true
UC12zKGLhMhDeDidoctM6BrA	UCN_Yp-5LABpTC1qLls2PXAA	1	true
UC12zKGLhMhDeDidoctM6BrA	UCdGpd0gNn38UKwoncZd9rmA	3	true
UC12zKGLhMhDeDidoctM6BrA	UCDtVoSwSwQgwhcC89Nlz5Vg	7	true
UC12zKGLhMhDeDidoctM6BrA	UC9fxSdFjcz5QWDEhYCk_k1w	2	true
UC12zKGLhMhDeDidoctM6BrA	UC6RQhzm93SterWntL7GzqYQ	2	true
UC12zKGLhMhDeDidoctM6BrA	UC5ZXYxeWlROKbL7JziJ0bIQ	1	true
UC12zKGLhMhDeDidoctM6BrA	UCquENngBYGYpHYtN0OVYLKQ	2	true
UC12zKGLhMhDeDidoctM6BrA	UChXNyp6dL_aY_3qwVgDd-EQ	4	true
UC12zKGLhMhDeDidoctM6BrA	UCYSslASzgHQ_F_vuTsmmi-g	2	true
UC12zKGLhMhDeDidoctM6BrA	UCr-BdJEeyDNlPodHF1pUKOg	2	true
UC12zKGLhMhDeDidoctM6BrA	UC9z9JemVpHB7BJtXjESAsOw	1	true
UC12zKGLhMhDeDidoctM6BrA	UCWq1xltHB2fDe6YkYoOrryg	1	true
UC12zKGLhMhDeDidoctM6BrA	UC5KkuUqkQBF8yD3xqbLMigA	1	true
UC12zKGLhMhDeDidoctM6BrA	UCO3YT7cu0cxd8gSQ6nCf0qg	2	true
UC12zKGLhMhDeDidoctM6BrA	UCwVmZjJwkCUCOes5_eAIebg	2	true
UC12zKGLhMhDeDidoctM6BrA	UCf4kyk1iMd03noNbDU2nNOg	2	true
UC12zKGLhMhDeDidoctM6BrA	UCN9eb1Z__4hietbXmwxOglw	5	true
UC12zKGLhMhDeDidoctM6BrA	UCvm2Fxo8EavRB59AVNF7F2g	1	true
UC12zKGLhMhDeDidoctM6BrA	UCCSQ6Dq4FDyN6rgWCt_uurQ	1	true
UC-4ddcVkyrXXbBqedYV4l9Q	UCOjnB2Ul08J7jM9npAvo6EA	1	true
UC-4ddcVkyrXXbBqedYV4l9Q	UCN-opsqqDunWO6h5uCp9Y4g	2	true
UC-4ddcVkyrXXbBqedYV4l9Q	UC-4ddcVkyrXXbBqedYV4l9Q	1	true
UC-4ddcVkyrXXbBqedYV4l9Q	UCuiLR4p6wQ3xLEm15pEn1Xw	1	true
UC-4ddcVkyrXXbBqedYV4l9Q	UCLgti7NuK0RuW9wty-fxPjQ	1	true
UC-4ddcVkyrXXbBqedYV4l9Q	UCG-eghyORxNrzSG8FkAWKyw	3	true
UC-4ddcVkyrXXbBqedYV4l9Q	UCEdgNBcBybRtwv836C8El4g	1	true
UC-4ddcVkyrXXbBqedYV4l9Q	UCq8ChnGCYMVCzDgGMK9e91A	1	true
UC-4ddcVkyrXXbBqedYV4l9Q	UCthbIFAxbXTTQEC7EcQvP1Q	1	true
UC-4ddcVkyrXXbBqedYV4l9Q	UCaNOyWyEVojnz4AolKeDFFA	1	true
UC-4ddcVkyrXXbBqedYV4l9Q	UC74icFVsxTFr2BW3Vm8n_iw	1	true
UC-4ddcVkyrXXbBqedYV4l9Q	UC12zKGLhMhDeDidoctM6BrA	4	true
UC-4ddcVkyrXXbBqedYV4l9Q	UC9zqTTVeClpqMQ5CLuJdWtw	5	true
UC-4ddcVkyrXXbBqedYV4l9Q	UC_53VGoH_0XLFmYVpGMvhvg	1	true
UC-4ddcVkyrXXbBqedYV4l9Q	UCNjPniJ9bZuCDQXCRqNsCBQ	1	true
UC-4ddcVkyrXXbBqedYV4l9Q	UC4zG6UeNUn-HM6UEFFkiESA	1	true
UC-4ddcVkyrXXbBqedYV4l9Q	UCxucJ9P3mLMneYypLZYn2uw	1	true
UC-4ddcVkyrXXbBqedYV4l9Q	UCnyFZr3wJBAJRjcqr_Q5Gug	1	true
UC-4ddcVkyrXXbBqedYV4l9Q	UCXj2oSzwg6G0iBjKg33joMQ	1	true
UC-4ddcVkyrXXbBqedYV4l9Q	UCOwuzVSWrrAdRIviGN7-T5g	1	true
UC-4ddcVkyrXXbBqedYV4l9Q	UCBL2tfrwhEhX52Dze_aO3zA	1	true
UC-4ddcVkyrXXbBqedYV4l9Q	UCw8ZXVXrAyNTdvzKH6HMhmg	1	true
UC-4ddcVkyrXXbBqedYV4l9Q	UClbjlUoxxs-Lc7V7tNVa8CQ	1	true
UC-4ddcVkyrXXbBqedYV4l9Q	UCg3fYev0mdtUvJvFJpQUM8g	1	true
UC-4ddcVkyrXXbBqedYV4l9Q	UCIQPHl1WKKTt9KkWyo_JNig	2	true
UC-4ddcVkyrXXbBqedYV4l9Q	UCJXAScTUxxfPzwLzZc3VUHA	1	true
UC-4ddcVkyrXXbBqedYV4l9Q	UCqZN-NqgP7bhbctbyThSVUA	1	true
UC-4ddcVkyrXXbBqedYV4l9Q	UCl1eRuftjRdetdWkrbeDBGg	1	true
UC-4ddcVkyrXXbBqedYV4l9Q	UCjaWLFTNqLkq3ZY2BJ4NYRg	1	true
UC-4ddcVkyrXXbBqedYV4l9Q	UCysFgzeqkdh4FU3g3jUvCbw	1	true
UC-4ddcVkyrXXbBqedYV4l9Q	UCVrKQMmA2ew9LFzeIDaOFgw	1	true
UC-4ddcVkyrXXbBqedYV4l9Q	UCW4t6ozY9VDVeN_GHK260BQ	1	true
UC-4ddcVkyrXXbBqedYV4l9Q	UCVVIVc6DfU8uWJ60vk8iKpQ	1	true
UC-4ddcVkyrXXbBqedYV4l9Q	UCH2VZQBLFTOp6I_qgnBJCuQ	1	true
UC-4ddcVkyrXXbBqedYV4l9Q	UCdKJlY5eAoSumIlcOcYxIGg	1	true
UC-4ddcVkyrXXbBqedYV4l9Q	UCD9kk0EUEtflrRl6TV0lDyA	1	true
UC-4ddcVkyrXXbBqedYV4l9Q	UC-TJtIntyZTj34lwLdSo2xQ	1	true
UC-4ddcVkyrXXbBqedYV4l9Q	UCUp-GSUuNxSZ7cxOg7ZnyqA	1	true
UC-4ddcVkyrXXbBqedYV4l9Q	UCo8W6UskksVPEfNj09a9dMA	1	true
UC-4ddcVkyrXXbBqedYV4l9Q	UCDtVoSwSwQgwhcC89Nlz5Vg	1	true
UC-4ddcVkyrXXbBqedYV4l9Q	UCqLpSeS-N7XDLkyta9QjHbw	1	true
UC-4ddcVkyrXXbBqedYV4l9Q	UCqnZW-G3y8afNMyYb821u6g	1	true
UC-4ddcVkyrXXbBqedYV4l9Q	UC3MmhFxndlz10oOgXvuvLPQ	1	true
UC-4ddcVkyrXXbBqedYV4l9Q	UCw3HLkyWjI3tD1RQTGEe8LA	1	true
UC-4ddcVkyrXXbBqedYV4l9Q	UC1Nm7gQCcGvgLyVcGTXp-Ww	1	true
UC-4ddcVkyrXXbBqedYV4l9Q	UC5hGM-gAk5I8zmn8xUKuNkw	1	true
UC-4ddcVkyrXXbBqedYV4l9Q	UCijEMORybIdM0CWLJaHjQGA	1	true
UC-4ddcVkyrXXbBqedYV4l9Q	UCCq8mh725qRQn8g2_PvibpA	1	true
UCWq1xltHB2fDe6YkYoOrryg	UCP-Vg2PcmLiWpEdvMI1R35w	2	true
UCWq1xltHB2fDe6YkYoOrryg	UCxt_nr6Xwbq4O2Ur9ZBpgAA	1	true
UCWq1xltHB2fDe6YkYoOrryg	UCzp_5fGv8jy8uf_Jl46nR2A	1	true
UCWq1xltHB2fDe6YkYoOrryg	UCJwqS9dQlV62tpNkqbNTZ8g	1	true
UCWq1xltHB2fDe6YkYoOrryg	UCbAiIkPobUFy71zlmwVw3jw	3	true
UCWq1xltHB2fDe6YkYoOrryg	UCcFgREmujdPHvA7I_VOmgIA	1	true
UCWq1xltHB2fDe6YkYoOrryg	UCWq1xltHB2fDe6YkYoOrryg	943	true
UCWq1xltHB2fDe6YkYoOrryg	UCH2VZQBLFTOp6I_qgnBJCuQ	12	true
UCWq1xltHB2fDe6YkYoOrryg	UCYfLDf9dRO6SW0hO2nPewrw	1	true
UCWq1xltHB2fDe6YkYoOrryg	UCuAaB8lLRmoZzOrc_d_Ka0A	2	true
UCWq1xltHB2fDe6YkYoOrryg	UCi2zMfox-UpFGAFfsMXqYfQ	1	true
UCWq1xltHB2fDe6YkYoOrryg	UCSFQIz7KvEWSwuCCh_zh_0Q	1	true
UCWq1xltHB2fDe6YkYoOrryg	UCHyeOQ0-Td0Dv3xfI0dwu3g	2	true
UCWq1xltHB2fDe6YkYoOrryg	UCn9Erjy00mpnWeLnRqhsA1g	12	true
UCWq1xltHB2fDe6YkYoOrryg	UCGILPX9AE6hZpqp1FjFn6pw	2	true
UCWq1xltHB2fDe6YkYoOrryg	UCA1nC2t2zfzBOySscmpIzGQ	1	true
UCWq1xltHB2fDe6YkYoOrryg	UC3Ooj_iDWELBumIEDejyNHQ	2	true
UCWq1xltHB2fDe6YkYoOrryg	UC1r7Gt4v-OD8domIE0Vw2Zg	1	true
UCWq1xltHB2fDe6YkYoOrryg	UC81fUuO3oGR-ju7tEAuyNPA	1	true
UCWq1xltHB2fDe6YkYoOrryg	UC876uazcW8p7wdl3JdbVIaA	1	true
UCWq1xltHB2fDe6YkYoOrryg	UC-qeHsCIc4DiYhmPq7cmLkQ	1	true
UCWq1xltHB2fDe6YkYoOrryg	UCnNvQI_yyWPZGI-rqFhR17Q	1	true
UCWq1xltHB2fDe6YkYoOrryg	UCaJqv_9-pPiWRCI33WQD9ZA	1	true
UCWq1xltHB2fDe6YkYoOrryg	UCSfmJw5USzP6Ca-uGPPsNRA	1	true
UCWq1xltHB2fDe6YkYoOrryg	UCT3P3oWIt21UsHi_wwDG8Yg	1	true
UCWq1xltHB2fDe6YkYoOrryg	UCnH3v7ENZKWTqATMGdpKxBQ	1	true
UCWq1xltHB2fDe6YkYoOrryg	UCgbbjw8zPkrmmL_XU1SgJBg	2	true
UCWq1xltHB2fDe6YkYoOrryg	UC0bD2v2yi9WoiupiOMV951Q	1	true
UCWq1xltHB2fDe6YkYoOrryg	UCvLNnnIZdqXYqAS-l8FLJFw	2	true
UCWq1xltHB2fDe6YkYoOrryg	UC1_-z9fMYofIUQWYUPoNyTw	2	true
UCWq1xltHB2fDe6YkYoOrryg	UCIFYUiFUWCQzDc9nc6KY2Ig	1	true
UCWq1xltHB2fDe6YkYoOrryg	UCIsrnGY0LfR4OT_PkfzAIJA	1	true
UCWq1xltHB2fDe6YkYoOrryg	UCstACT0WwMpTjTrbpFYk16Q	45	true
UCthbIFAxbXTTQEC7EcQvP1Q	UCQET9CZdh03jWnpY7WY25EA	1	true
UCthbIFAxbXTTQEC7EcQvP1Q	UCtvvTFp0XANyllOdmzZr9VQ	1	true
UCthbIFAxbXTTQEC7EcQvP1Q	UCG-eghyORxNrzSG8FkAWKyw	4	true
UCthbIFAxbXTTQEC7EcQvP1Q	UCOJNw9aHGRkYuIOqwU7yK-Q	1	true
UCthbIFAxbXTTQEC7EcQvP1Q	UCT0JugAtGmqiYkwxFZOwAtg	4	true
UCthbIFAxbXTTQEC7EcQvP1Q	UCpLR-q8rFLe_rEAXf4PRxRg	4	true
UCthbIFAxbXTTQEC7EcQvP1Q	UCJVTsYjG0KLNWL6OyHx7ZGw	1	true
UCthbIFAxbXTTQEC7EcQvP1Q	UCxt_nr6Xwbq4O2Ur9ZBpgAA	1	true
UCthbIFAxbXTTQEC7EcQvP1Q	UC0NtqwtL1oLxwm3lx_Uo5Og	1	true
UCthbIFAxbXTTQEC7EcQvP1Q	UCOO3a8hkldq6zGAOxgvZndw	1	true
UCthbIFAxbXTTQEC7EcQvP1Q	UC52YPxBsiE7Xcf_53WYXvTQ	1	true
UCthbIFAxbXTTQEC7EcQvP1Q	UCzjtGnD7qqeaHW3nvDVrjQA	2	true
UCthbIFAxbXTTQEC7EcQvP1Q	UCRuy5PigeeBuecKnwqhM4yg	13	true
UCthbIFAxbXTTQEC7EcQvP1Q	UC6RQhzm93SterWntL7GzqYQ	1	true
UCthbIFAxbXTTQEC7EcQvP1Q	UCuiLR4p6wQ3xLEm15pEn1Xw	1	true
UCthbIFAxbXTTQEC7EcQvP1Q	UCI4mls1kw1nChubkbVeRLKw	1	true
UCthbIFAxbXTTQEC7EcQvP1Q	UCHyeOQ0-Td0Dv3xfI0dwu3g	1	true
UCthbIFAxbXTTQEC7EcQvP1Q	UCvLNnnIZdqXYqAS-l8FLJFw	1	true
UCthbIFAxbXTTQEC7EcQvP1Q	UCRfUfNEJVaY8AbAcb46qX0g	1	true
UCthbIFAxbXTTQEC7EcQvP1Q	UCg7yfJ8e1TRqyA1tSkALyzg	2	true
UCthbIFAxbXTTQEC7EcQvP1Q	UCMMJm4lYxEh7GM4loYh6-SQ	1	true
UCthbIFAxbXTTQEC7EcQvP1Q	UCOzxzEu70fNClG-9nNi4Yzw	5	true
UCthbIFAxbXTTQEC7EcQvP1Q	UCVqNUy4-FTLMwMKX-krfB6A	2	true
UCthbIFAxbXTTQEC7EcQvP1Q	UCllbSdCRAEsPGa4JpJuLZHg	1	true
UCthbIFAxbXTTQEC7EcQvP1Q	UCjSgG4M0KM0jDBgkjwFVrjg	2	true
UCthbIFAxbXTTQEC7EcQvP1Q	UCnZOYk5co0M7hA5z1ML_45g	1	true
UCthbIFAxbXTTQEC7EcQvP1Q	UChkPByjtZumJrJmtqkiw5Jg	1	true
UCthbIFAxbXTTQEC7EcQvP1Q	UCxy9I7D4Q8VSx1wunLsntOQ	1	true
UCthbIFAxbXTTQEC7EcQvP1Q	UCKfap1xgEqqAhN7jtYgDsYg	1	true
UCthbIFAxbXTTQEC7EcQvP1Q	UCAGWqQrxEF0Jb35zDnNaLgg	1	true
UCthbIFAxbXTTQEC7EcQvP1Q	UCjnw-Wmtd7O89zlFSh1O2SA	2	true
UCthbIFAxbXTTQEC7EcQvP1Q	UCdsgzVdqZ9Muii2OpR3t_ww	2	true
UCthbIFAxbXTTQEC7EcQvP1Q	UC9npsqVPOTyKQK8TiVDAe2Q	1	true
UCKtJs_zI1yzswHDWqkqHtWw	UCz54U1Ts7JR7ZtSiClcVOOw	1	true
UCKtJs_zI1yzswHDWqkqHtWw	UCKtJs_zI1yzswHDWqkqHtWw	16	true
UCKtJs_zI1yzswHDWqkqHtWw	UC12zKGLhMhDeDidoctM6BrA	14	true
UCKtJs_zI1yzswHDWqkqHtWw	UCG-eghyORxNrzSG8FkAWKyw	2	true
UCKtJs_zI1yzswHDWqkqHtWw	UC3O9y5JRSBqn4YhCEvBys_Q	2	true
UCKtJs_zI1yzswHDWqkqHtWw	UCMYTIyqS1-7wT-3pBB8bR5A	3	true
UCKtJs_zI1yzswHDWqkqHtWw	UCI2EhvTADDdOex2nBIRsigw	2	true
UCKtJs_zI1yzswHDWqkqHtWw	UCGfBE94turq_hyKMxB-Dfrg	3	true
UCKtJs_zI1yzswHDWqkqHtWw	UCORRcj9wv5DEYCEg2LhBcLQ	2	true
UCKtJs_zI1yzswHDWqkqHtWw	UCUtDAMp91VCfHTZ9_ypKRPA	1	true
UCKtJs_zI1yzswHDWqkqHtWw	UCjaWLFTNqLkq3ZY2BJ4NYRg	3	true
UCKtJs_zI1yzswHDWqkqHtWw	UCPGGSQfN8LREy6dWdk85fpw	1	true
UCKtJs_zI1yzswHDWqkqHtWw	UCP391YRAjSOdM_bwievgaZA	6	true
UCKtJs_zI1yzswHDWqkqHtWw	UCSv9d0kQegylHWpP83jWSQg	1	true
UCKtJs_zI1yzswHDWqkqHtWw	UC1RnMyP-HfZCyMLX0TmyMTg	1	true
UCKtJs_zI1yzswHDWqkqHtWw	UCNl_i-ggJbZNyOLlhE7yyhw	1	true
UCKtJs_zI1yzswHDWqkqHtWw	UC8IbAhPglJ1OeC44A_Gtmqg	6	true
UCKtJs_zI1yzswHDWqkqHtWw	UCgbbjw8zPkrmmL_XU1SgJBg	1	true
UCKtJs_zI1yzswHDWqkqHtWw	UCDfwywWnYoB7sHPV5udsj0g	1	true
UCKtJs_zI1yzswHDWqkqHtWw	UCIQPHl1WKKTt9KkWyo_JNig	2	true
UCKtJs_zI1yzswHDWqkqHtWw	UCy7oVBYY0FGXeeJpy6ITXxQ	8	true
UCKtJs_zI1yzswHDWqkqHtWw	UCGILPX9AE6hZpqp1FjFn6pw	1	true
UCKtJs_zI1yzswHDWqkqHtWw	UCJ4uxK_mo6gNoqk9cyvgWkw	2	true
UCKtJs_zI1yzswHDWqkqHtWw	UCxbqmMsXory_zC-kNqKHUgw	3	true
UCKtJs_zI1yzswHDWqkqHtWw	UC8QNlbRIeKQsbG8u_qIzowQ	1	true
UCKtJs_zI1yzswHDWqkqHtWw	UChXNyp6dL_aY_3qwVgDd-EQ	5	true
UCKtJs_zI1yzswHDWqkqHtWw	UC9fxSdFjcz5QWDEhYCk_k1w	1	true
UCKtJs_zI1yzswHDWqkqHtWw	UCEA5mVrH3jPMmuah5qD0DUA	1	true
UCKtJs_zI1yzswHDWqkqHtWw	UCWX70TFNwDsBLYlRzOe_-zw	2	true
UCKtJs_zI1yzswHDWqkqHtWw	UCoyhq57ClXRTd4h8vpiMelA	2	true
UCKtJs_zI1yzswHDWqkqHtWw	UCtgFbv9VEh7IOw3vxMAP43A	1	true
UCKtJs_zI1yzswHDWqkqHtWw	UC2P4D6uHis-ENplUEPyK4tA	1	true
UCKtJs_zI1yzswHDWqkqHtWw	UCWq1xltHB2fDe6YkYoOrryg	1	true
UCKtJs_zI1yzswHDWqkqHtWw	UCJZOLak0v_pR6AjYsbyAoog	1	true
UCKtJs_zI1yzswHDWqkqHtWw	UCwQhAc44SfDvhdCQiHluBVQ	2	true
UCKtJs_zI1yzswHDWqkqHtWw	UCvLNnnIZdqXYqAS-l8FLJFw	2	true
UCoa-D_VfMkFrCYodrOC9-mA	UCoa-D_VfMkFrCYodrOC9-mA	86	true
UCoa-D_VfMkFrCYodrOC9-mA	UCMYTIyqS1-7wT-3pBB8bR5A	6	true
UCoa-D_VfMkFrCYodrOC9-mA	UCORRcj9wv5DEYCEg2LhBcLQ	1	true
UCoa-D_VfMkFrCYodrOC9-mA	UC12zKGLhMhDeDidoctM6BrA	9	true
UCoa-D_VfMkFrCYodrOC9-mA	UCP-Vg2PcmLiWpEdvMI1R35w	2	true
UCoa-D_VfMkFrCYodrOC9-mA	UCN-opsqqDunWO6h5uCp9Y4g	5	true
UCoa-D_VfMkFrCYodrOC9-mA	UCG-eghyORxNrzSG8FkAWKyw	5	true
UCoa-D_VfMkFrCYodrOC9-mA	UCIQPHl1WKKTt9KkWyo_JNig	5	true
UCoa-D_VfMkFrCYodrOC9-mA	UCUtDAMp91VCfHTZ9_ypKRPA	2	true
UCoa-D_VfMkFrCYodrOC9-mA	UCsRfBAspa72ExrsN347W2xg	9	true
UCoa-D_VfMkFrCYodrOC9-mA	UC9zqTTVeClpqMQ5CLuJdWtw	6	true
UCoa-D_VfMkFrCYodrOC9-mA	UCWdXgfpEIZIGzah9_yCL-Xw	2	true
UCoa-D_VfMkFrCYodrOC9-mA	UChFIPDFYjTFg03eWlwmQcTA	1	true
UCoa-D_VfMkFrCYodrOC9-mA	UCP391YRAjSOdM_bwievgaZA	16	true
UCoa-D_VfMkFrCYodrOC9-mA	UCjaWLFTNqLkq3ZY2BJ4NYRg	6	true
UCoa-D_VfMkFrCYodrOC9-mA	UCVrKQMmA2ew9LFzeIDaOFgw	6	true
UCoa-D_VfMkFrCYodrOC9-mA	UCGfBE94turq_hyKMxB-Dfrg	3	true
UCoa-D_VfMkFrCYodrOC9-mA	UCsdIGtyuyiW--cidQQ6KUsw	1	true
UCoa-D_VfMkFrCYodrOC9-mA	UC_er6_R1PKUCxc7QSXxIvzw	1	true
UCoa-D_VfMkFrCYodrOC9-mA	UCbAiIkPobUFy71zlmwVw3jw	1	true
UCoa-D_VfMkFrCYodrOC9-mA	UCi2zMfox-UpFGAFfsMXqYfQ	1	true
UCoa-D_VfMkFrCYodrOC9-mA	UCyCZb-wsvM_VFKSbyKftgHg	1	true
UCoa-D_VfMkFrCYodrOC9-mA	UCqTxFR0G0ulWso4ZP8z3IJA	2	true
UCoa-D_VfMkFrCYodrOC9-mA	UCkke64Kird1ZcZsPJEo_hYg	1	true
UCoa-D_VfMkFrCYodrOC9-mA	UCQGAqLdIBfVSB5qzTtT-Urg	1	true
UCoa-D_VfMkFrCYodrOC9-mA	UCU8Y4bqcr0unUI18EcVmo4Q	1	true
UCoa-D_VfMkFrCYodrOC9-mA	UCoyhq57ClXRTd4h8vpiMelA	2	true
UCoa-D_VfMkFrCYodrOC9-mA	UCAAqC3FgQfWxu_ui-1gynzQ	1	true
UCoa-D_VfMkFrCYodrOC9-mA	UCvLNnnIZdqXYqAS-l8FLJFw	3	true
UCoa-D_VfMkFrCYodrOC9-mA	UCwQdXKdraEfNZv9b4IWFn5g	1	true
UCoa-D_VfMkFrCYodrOC9-mA	UCPHXtAKuUXPOwdEUzMgSD0A	1	true
UCoa-D_VfMkFrCYodrOC9-mA	UCjn8lktJ0qykReZ_FsPxH8w	1	true
UCoa-D_VfMkFrCYodrOC9-mA	UCSyUhW3u3JazIT3VtE4nCEw	1	true
UC5ZXYxeWlROKbL7JziJ0bIQ	UCLgti7NuK0RuW9wty-fxPjQ	1	true
UC5ZXYxeWlROKbL7JziJ0bIQ	UCSv9d0kQegylHWpP83jWSQg	4	true
UC5ZXYxeWlROKbL7JziJ0bIQ	UCPR3gVNYBzi-02_O4noC1Zg	1	true
UC5ZXYxeWlROKbL7JziJ0bIQ	UCEWHPFNilsT0IfQfutVzsag	2	true
UC5ZXYxeWlROKbL7JziJ0bIQ	UCW3l9WndLOjhRtsg0Aa--2g	1	true
UC5ZXYxeWlROKbL7JziJ0bIQ	UC9zqTTVeClpqMQ5CLuJdWtw	2	true
UC5ZXYxeWlROKbL7JziJ0bIQ	UCxt_nr6Xwbq4O2Ur9ZBpgAA	1	true
UC5ZXYxeWlROKbL7JziJ0bIQ	UCq8ChnGCYMVCzDgGMK9e91A	1	true
UC5ZXYxeWlROKbL7JziJ0bIQ	UC5ZXYxeWlROKbL7JziJ0bIQ	162	true
UC5ZXYxeWlROKbL7JziJ0bIQ	UCH2VZQBLFTOp6I_qgnBJCuQ	1	true
UC5ZXYxeWlROKbL7JziJ0bIQ	UC8QAdpiEWAOg3AOCCFDCOYw	2	true
UC5ZXYxeWlROKbL7JziJ0bIQ	UCSBSGWNP1RK74Wh7XYex_Gw	1	true
UC5ZXYxeWlROKbL7JziJ0bIQ	UCBMKrkHv07GoYb5ITLt0sYQ	3	true
UC5ZXYxeWlROKbL7JziJ0bIQ	UCB0zinWfy-dS_NqcOINYo3A	1	true
UC5ZXYxeWlROKbL7JziJ0bIQ	UC6RQhzm93SterWntL7GzqYQ	3	true
UC5ZXYxeWlROKbL7JziJ0bIQ	UCG-eghyORxNrzSG8FkAWKyw	1	true
UC5ZXYxeWlROKbL7JziJ0bIQ	UCuAaB8lLRmoZzOrc_d_Ka0A	1	true
UC5ZXYxeWlROKbL7JziJ0bIQ	UClu474HMt895mVxZdlIHXEA	1	true
UC5ZXYxeWlROKbL7JziJ0bIQ	UC4zG6UeNUn-HM6UEFFkiESA	1	true
UC5ZXYxeWlROKbL7JziJ0bIQ	UCzDQaYfHMJrXfw46whk6hIg	1	true
UC5ZXYxeWlROKbL7JziJ0bIQ	UCVrKQMmA2ew9LFzeIDaOFgw	1	true
UC5ZXYxeWlROKbL7JziJ0bIQ	UCC6f63SXY0CDpsPGDBtTWVg	5	true
UC5ZXYxeWlROKbL7JziJ0bIQ	UCEsbaUdrM_87K-2um30hf8Q	1	true
UC5ZXYxeWlROKbL7JziJ0bIQ	UC7qK1TCeLAr8qOeclO-s39g	2	true
UC5ZXYxeWlROKbL7JziJ0bIQ	UC9sV0ieuVY2_K4LucZf4yow	1	true
UC5ZXYxeWlROKbL7JziJ0bIQ	UCpLR-q8rFLe_rEAXf4PRxRg	4	true
UC5ZXYxeWlROKbL7JziJ0bIQ	UCqAjL4g0-FJ4-aocsfQZkZg	2	true
UC5ZXYxeWlROKbL7JziJ0bIQ	UCVUF80k8eY8T5-18TPL9xDA	1	true
UC5ZXYxeWlROKbL7JziJ0bIQ	UCyyD0uZzrvjF4GKsmFBuUOg	1	true
UC5ZXYxeWlROKbL7JziJ0bIQ	UCMMJm4lYxEh7GM4loYh6-SQ	1	true
UC5ZXYxeWlROKbL7JziJ0bIQ	UC3gQ9lIiPQj7frT5CE5QyRA	4	true
UC5ZXYxeWlROKbL7JziJ0bIQ	UCyG6SY3s8fS7ZKje6lv1JKg	1	true
UC5ZXYxeWlROKbL7JziJ0bIQ	UC2m7CnTMT-AMH5w2IgBURnA	2	true
UC5ZXYxeWlROKbL7JziJ0bIQ	UCz84Tivi_d214XXnxGbtKHQ	1	true
UC5ZXYxeWlROKbL7JziJ0bIQ	UC96qopSyu7Ga75jW3HEO88w	1	true
UC5ZXYxeWlROKbL7JziJ0bIQ	UCDoPuIvx88nh69fS5VJCNWg	2	true
UC5ZXYxeWlROKbL7JziJ0bIQ	UC1_-z9fMYofIUQWYUPoNyTw	1	true
UC5ZXYxeWlROKbL7JziJ0bIQ	UC9HT4JrbO6TSfjDHTzFgbPQ	1	true
UC5ZXYxeWlROKbL7JziJ0bIQ	UCV2kagEmsbrO5lc6glH-8jA	2	true
UC5ZXYxeWlROKbL7JziJ0bIQ	UCYmHuI1yrP_pkSsJlQRCi1g	1	true
UC5ZXYxeWlROKbL7JziJ0bIQ	UCRfUfNEJVaY8AbAcb46qX0g	1	true
UC5ZXYxeWlROKbL7JziJ0bIQ	UC-l4Sv-gy98g_NBasXEEcGg	3	true
UC5ZXYxeWlROKbL7JziJ0bIQ	UC5nLISkLI9zsaMHp4YBYTFw	1	true
UC-v1PJRoid6DGFzY1jVU3hg	UC5z5hsnZOZJH8vFacP-9poQ	1	true
UC-v1PJRoid6DGFzY1jVU3hg	UCCdnN4v9Fia0pjUzYlUBsGg	1	true
UC-v1PJRoid6DGFzY1jVU3hg	UCG-eghyORxNrzSG8FkAWKyw	1	true
UC-v1PJRoid6DGFzY1jVU3hg	UCSv9d0kQegylHWpP83jWSQg	1	true
UC-v1PJRoid6DGFzY1jVU3hg	UCthbIFAxbXTTQEC7EcQvP1Q	2	true
UC-v1PJRoid6DGFzY1jVU3hg	UCsRfBAspa72ExrsN347W2xg	1	true
UC-v1PJRoid6DGFzY1jVU3hg	UCwJXtk_1CKlCrh7YJDP2uPw	1	true
UC-v1PJRoid6DGFzY1jVU3hg	UCPR3gVNYBzi-02_O4noC1Zg	1	true
UC-v1PJRoid6DGFzY1jVU3hg	UCuAaB8lLRmoZzOrc_d_Ka0A	2	true
UC-v1PJRoid6DGFzY1jVU3hg	UChsZDP7pW_08Sk6Tp4U8KJA	1	true
UC-v1PJRoid6DGFzY1jVU3hg	UCjaWLFTNqLkq3ZY2BJ4NYRg	1	true
UC-v1PJRoid6DGFzY1jVU3hg	UCk0U1Js-um2lRjSF3VoS_3A	1	true
UC-v1PJRoid6DGFzY1jVU3hg	UC2mmP8ysfyko40KSn90x6Og	1	true
UC-v1PJRoid6DGFzY1jVU3hg	UCGo3vjM2Ll3XujL-zYT5SMg	1	true
UC-v1PJRoid6DGFzY1jVU3hg	UCWoe_w-oadmQxcXZV2KMZgg	1	true
UC-v1PJRoid6DGFzY1jVU3hg	UCyG6SY3s8fS7ZKje6lv1JKg	1	true
UC-v1PJRoid6DGFzY1jVU3hg	UCHyeOQ0-Td0Dv3xfI0dwu3g	1	true
UC-v1PJRoid6DGFzY1jVU3hg	UCP391YRAjSOdM_bwievgaZA	1	true
UC-v1PJRoid6DGFzY1jVU3hg	UCsYo9r-JIEkhoRoc9G5gdpQ	1	true
UC-v1PJRoid6DGFzY1jVU3hg	UCVqS-HRwe2vq_Jjgu4fg-UA	1	true
UC-v1PJRoid6DGFzY1jVU3hg	UCKsGFyhL7_fDCEYN5jDYhew	6	true
UC-v1PJRoid6DGFzY1jVU3hg	UCHbGJ36_GFxqzZbWxqAn0zQ	1	true
UC-v1PJRoid6DGFzY1jVU3hg	UC5ZXYxeWlROKbL7JziJ0bIQ	1	true
UC-v1PJRoid6DGFzY1jVU3hg	UC-v1PJRoid6DGFzY1jVU3hg	88	true
UC-v1PJRoid6DGFzY1jVU3hg	UCQz-h9kq50OxKmU2yGoOWlg	3	true
UC-v1PJRoid6DGFzY1jVU3hg	UCWq1xltHB2fDe6YkYoOrryg	1	true
UC-v1PJRoid6DGFzY1jVU3hg	UCvLNnnIZdqXYqAS-l8FLJFw	1	true
UC-v1PJRoid6DGFzY1jVU3hg	UCKFKv33ofAtflmz0C-TKnQA	1	true
UC-v1PJRoid6DGFzY1jVU3hg	UCxG1mll0wS-Q_ZvQ8rJuqag	3	true
UC-v1PJRoid6DGFzY1jVU3hg	UC9coa4eWvwznczn6P-RXLwQ	1	true
UC-v1PJRoid6DGFzY1jVU3hg	UCbHRDtYcy75lsoRdZ2h_24A	1	true
UC-v1PJRoid6DGFzY1jVU3hg	UCHvDONQK4hL1_7sgIMg0iPQ	1	true
UC-v1PJRoid6DGFzY1jVU3hg	UCa1o8yRux22rDwRbEjokSPg	1	true
UC-v1PJRoid6DGFzY1jVU3hg	UCmV27tf2iqUZDDtXiShSKUg	1	true
UCz54U1Ts7JR7ZtSiClcVOOw	UCN-opsqqDunWO6h5uCp9Y4g	4	true
UCz54U1Ts7JR7ZtSiClcVOOw	UCG-eghyORxNrzSG8FkAWKyw	1	true
UCz54U1Ts7JR7ZtSiClcVOOw	UCz54U1Ts7JR7ZtSiClcVOOw	3	true
UCz54U1Ts7JR7ZtSiClcVOOw	UCORRcj9wv5DEYCEg2LhBcLQ	1	true
UCz54U1Ts7JR7ZtSiClcVOOw	UCfYrK5JU5EznsnK3wQE7iIg	2	true
UCz54U1Ts7JR7ZtSiClcVOOw	UCGfBE94turq_hyKMxB-Dfrg	2	true
UCz54U1Ts7JR7ZtSiClcVOOw	UC9zqTTVeClpqMQ5CLuJdWtw	2	true
UCz54U1Ts7JR7ZtSiClcVOOw	UCKtJs_zI1yzswHDWqkqHtWw	1	true
UCz54U1Ts7JR7ZtSiClcVOOw	UCQdOZmbeT9UoQy8G3zeNE-g	2	true
UCz54U1Ts7JR7ZtSiClcVOOw	UCTrx5uG9vJjTLloAH8hE-pg	2	true
UCz54U1Ts7JR7ZtSiClcVOOw	UCMYTIyqS1-7wT-3pBB8bR5A	1	true
UCz54U1Ts7JR7ZtSiClcVOOw	UCxt_nr6Xwbq4O2Ur9ZBpgAA	1	true
UCz54U1Ts7JR7ZtSiClcVOOw	UCv2svvDbMNunUuPs8hUUKVA	1	true
UCz54U1Ts7JR7ZtSiClcVOOw	UCNl_i-ggJbZNyOLlhE7yyhw	2	true
UCz54U1Ts7JR7ZtSiClcVOOw	UC8IbAhPglJ1OeC44A_Gtmqg	1	true
UCz54U1Ts7JR7ZtSiClcVOOw	UC12zKGLhMhDeDidoctM6BrA	4	true
UCz54U1Ts7JR7ZtSiClcVOOw	UCjaWLFTNqLkq3ZY2BJ4NYRg	3	true
UCz54U1Ts7JR7ZtSiClcVOOw	UCDtVoSwSwQgwhcC89Nlz5Vg	1	true
UCz54U1Ts7JR7ZtSiClcVOOw	UCxucJ9P3mLMneYypLZYn2uw	1	true
UCz54U1Ts7JR7ZtSiClcVOOw	UCk9mgpQVdJ5oKQWkM1UPBaQ	1	true
UCz54U1Ts7JR7ZtSiClcVOOw	UC8QNlbRIeKQsbG8u_qIzowQ	1	true
UCz54U1Ts7JR7ZtSiClcVOOw	UCP391YRAjSOdM_bwievgaZA	3	true
UCz54U1Ts7JR7ZtSiClcVOOw	UCVrKQMmA2ew9LFzeIDaOFgw	2	true
UCz54U1Ts7JR7ZtSiClcVOOw	UCm17GAihi4NAVEnA1n4WajQ	1	true
UCz54U1Ts7JR7ZtSiClcVOOw	UCGo3vjM2Ll3XujL-zYT5SMg	1	true
UCz54U1Ts7JR7ZtSiClcVOOw	UC3O9y5JRSBqn4YhCEvBys_Q	1	true
UCz54U1Ts7JR7ZtSiClcVOOw	UC_er6_R1PKUCxc7QSXxIvzw	1	true
UCz54U1Ts7JR7ZtSiClcVOOw	UC1Nm7gQCcGvgLyVcGTXp-Ww	1	true
UCz54U1Ts7JR7ZtSiClcVOOw	UCSv9d0kQegylHWpP83jWSQg	1	true
UCz54U1Ts7JR7ZtSiClcVOOw	UClu474HMt895mVxZdlIHXEA	1	true
UCz54U1Ts7JR7ZtSiClcVOOw	UCPR3gVNYBzi-02_O4noC1Zg	2	true
UCz54U1Ts7JR7ZtSiClcVOOw	UCUtDAMp91VCfHTZ9_ypKRPA	1	true
UCz54U1Ts7JR7ZtSiClcVOOw	UCh897BiM_CQJtK2gL29tYSg	1	true
UCz54U1Ts7JR7ZtSiClcVOOw	UCi0ftpk_k9UhC2oNrnxatNA	1	true
UCz54U1Ts7JR7ZtSiClcVOOw	UCoa-D_VfMkFrCYodrOC9-mA	1	true
UCz54U1Ts7JR7ZtSiClcVOOw	UC-wcdrzucnlKGBjyEUaEWaQ	1	true
UCz54U1Ts7JR7ZtSiClcVOOw	UCwQhAc44SfDvhdCQiHluBVQ	1	true
UCz54U1Ts7JR7ZtSiClcVOOw	UCD9kk0EUEtflrRl6TV0lDyA	1	true
UCz54U1Ts7JR7ZtSiClcVOOw	UCcoPc-BqFPkVkkwyS35J-ng	1	true
UCz54U1Ts7JR7ZtSiClcVOOw	UCL0sWgefmtjUNvtBafXQmhA	1	true
UCz54U1Ts7JR7ZtSiClcVOOw	UCqvGEQ2q-gScRQpl158SAfQ	1	true
UCz54U1Ts7JR7ZtSiClcVOOw	UCpvhFBKf_dacTd8NFRgcTxQ	1	true
UCz54U1Ts7JR7ZtSiClcVOOw	UC9fxSdFjcz5QWDEhYCk_k1w	1	true
UCz54U1Ts7JR7ZtSiClcVOOw	UCsGzj2UYih1rr91iuFVPKiQ	1	true
UCz54U1Ts7JR7ZtSiClcVOOw	UC5hGM-gAk5I8zmn8xUKuNkw	1	true
UCz54U1Ts7JR7ZtSiClcVOOw	UCu_a6PAzp30Bn2mM-Ll09LA	1	true
UCz54U1Ts7JR7ZtSiClcVOOw	UCAAqC3FgQfWxu_ui-1gynzQ	1	true
UCz54U1Ts7JR7ZtSiClcVOOw	UCvLNnnIZdqXYqAS-l8FLJFw	1	true
UCz54U1Ts7JR7ZtSiClcVOOw	UCooHPZW1y9nswIiZuA0EORw	1	true
UCz54U1Ts7JR7ZtSiClcVOOw	UCdWWan__ZRGzfVZ81nfE3KA	1	true
UCk9mgpQVdJ5oKQWkM1UPBaQ	UCe1XNXkGImWSq5n4wkzNjBw	57	true
UCk9mgpQVdJ5oKQWkM1UPBaQ	UCk9mgpQVdJ5oKQWkM1UPBaQ	76	true
UCk9mgpQVdJ5oKQWkM1UPBaQ	UCcyrEfqNzo1AWnC_PPA4rzw	1	true
UCk9mgpQVdJ5oKQWkM1UPBaQ	UCol52xtoFqjdeW2t-JvLkeQ	2	true
UCk9mgpQVdJ5oKQWkM1UPBaQ	UCfMqB9cB9RfC1r2CMPnYDNw	1	true
UCk9mgpQVdJ5oKQWkM1UPBaQ	UCPR3gVNYBzi-02_O4noC1Zg	14	true
UCk9mgpQVdJ5oKQWkM1UPBaQ	UCP-Vg2PcmLiWpEdvMI1R35w	1	true
UCk9mgpQVdJ5oKQWkM1UPBaQ	UCxucJ9P3mLMneYypLZYn2uw	1	true
UCk9mgpQVdJ5oKQWkM1UPBaQ	UC9zqTTVeClpqMQ5CLuJdWtw	10	true
UCk9mgpQVdJ5oKQWkM1UPBaQ	UCXj2oSzwg6G0iBjKg33joMQ	1	true
UCk9mgpQVdJ5oKQWkM1UPBaQ	UCVrKQMmA2ew9LFzeIDaOFgw	1	true
UCk9mgpQVdJ5oKQWkM1UPBaQ	UCVPdtCCsEsem4hyVwS_GzOQ	3	true
UCk9mgpQVdJ5oKQWkM1UPBaQ	UCxm7PwK74oVJtyP0vN2qQIw	2	true
UCk9mgpQVdJ5oKQWkM1UPBaQ	UCOX1xjMcnZVmV-yx0VC6Fvg	2	true
UCk9mgpQVdJ5oKQWkM1UPBaQ	UCB64lmy3pK38sjYIVjiZN8A	1	true
UCk9mgpQVdJ5oKQWkM1UPBaQ	UCGbDaS58FGh45Oq4N-Qfhdw	1	true
UCk9mgpQVdJ5oKQWkM1UPBaQ	UC0LDNBjI8prPXedEj3QosOQ	3	true
UCk9mgpQVdJ5oKQWkM1UPBaQ	UClu474HMt895mVxZdlIHXEA	1	true
UCk9mgpQVdJ5oKQWkM1UPBaQ	UCQKBmUf2GZUXRQFpzCPN5og	1	true
UCk9mgpQVdJ5oKQWkM1UPBaQ	UCi2zMfox-UpFGAFfsMXqYfQ	2	true
UCk9mgpQVdJ5oKQWkM1UPBaQ	UCP391YRAjSOdM_bwievgaZA	1	true
UCk9mgpQVdJ5oKQWkM1UPBaQ	UCwQhAc44SfDvhdCQiHluBVQ	13	true
UCk9mgpQVdJ5oKQWkM1UPBaQ	UCGo3vjM2Ll3XujL-zYT5SMg	1	true
UCk9mgpQVdJ5oKQWkM1UPBaQ	UC4F32QLrpDmmRrozxr9z59g	73	true
UCk9mgpQVdJ5oKQWkM1UPBaQ	UCa1o8yRux22rDwRbEjokSPg	1	true
UCk9mgpQVdJ5oKQWkM1UPBaQ	UCQNi2fXhCHRu8-b-w29SMCA	3	true
UCk9mgpQVdJ5oKQWkM1UPBaQ	UCgrLZ1vLKak20iMSxK13C9w	1	true
UCk9mgpQVdJ5oKQWkM1UPBaQ	UClN6OLbLp1YjTSwDOkEM2dA	13	true
UCk9mgpQVdJ5oKQWkM1UPBaQ	UCrSYAKKH6gYD04KA-0ZkLAQ	1	true
UCk9mgpQVdJ5oKQWkM1UPBaQ	UCeYMquYSGFQ6ryJQ1QWxn6w	2	true
UCk9mgpQVdJ5oKQWkM1UPBaQ	UCLJM5tW9y0KpbKo-F7-kGEQ	1	true
UCWq1xltHB2fDe6YkYoOrryg	UC42k7FI53tnSSIjgzW-rbLA	1	true
UCWq1xltHB2fDe6YkYoOrryg	UCFl00VTEDEA0cHCoMQ7CuZg	1	true
UCWq1xltHB2fDe6YkYoOrryg	UCk0U1Js-um2lRjSF3VoS_3A	1	true
UCWq1xltHB2fDe6YkYoOrryg	UCghJZXv-Cg90zgdeTZCt_-A	1	true
UCWq1xltHB2fDe6YkYoOrryg	UChsb03kH_dNRh2-wE8GkeaA	2	true
UCWq1xltHB2fDe6YkYoOrryg	UCFbx6QBTcDI6toOnO-EyajQ	1	true
UCWq1xltHB2fDe6YkYoOrryg	UCoi5cG7JL_kZ-LGW6-PtZ_w	1	true
UCWq1xltHB2fDe6YkYoOrryg	UCMMJm4lYxEh7GM4loYh6-SQ	1	true
UCWq1xltHB2fDe6YkYoOrryg	UC9fxSdFjcz5QWDEhYCk_k1w	1	true
UCWq1xltHB2fDe6YkYoOrryg	UCIirjo8OWJBMLfV_peBD6RQ	2	true
UCWq1xltHB2fDe6YkYoOrryg	UCa1o8yRux22rDwRbEjokSPg	1	true
UCWq1xltHB2fDe6YkYoOrryg	UCxbqmMsXory_zC-kNqKHUgw	1	true
UCWq1xltHB2fDe6YkYoOrryg	UCilO3ZOPdzgmccJg_NpJ5XA	1	true
UCWq1xltHB2fDe6YkYoOrryg	UCrtNrQTDykcrtfYMkggmV5g	1	true
UCWq1xltHB2fDe6YkYoOrryg	UCBrf8ddDbkt70nWkJHlc42A	1	true
UCWq1xltHB2fDe6YkYoOrryg	UCfwxLOjkmp3gSEB2KCYhOlw	1	true
UCWq1xltHB2fDe6YkYoOrryg	UC3vZWDAhX5356m17Vy1B2GA	1	true
UC12zKGLhMhDeDidoctM6BrA	UCxucJ9P3mLMneYypLZYn2uw	12	true
UC12zKGLhMhDeDidoctM6BrA	UChHd-MU2mOvZHmBQz6zJw_w	10	true
UC12zKGLhMhDeDidoctM6BrA	UC3d7Ix6GrtxESULE5Auj_Zg	1	true
UC12zKGLhMhDeDidoctM6BrA	UCP-Vg2PcmLiWpEdvMI1R35w	2	true
[truncated: 8,035 more rows]
