# Supplementary material
Source: publisher figshare collection journal article supplement (https://frontiersin.figshare.com/ndownloader/files/25261583)
Supplement: Supplementary file 5 [file 25261583 › yt_recommendation/data/01-initial_ytdt_query/query_1-videonet_search50_nodes1714_2020_02_10-19_04_01.gdf]

nodedef>name VARCHAR	label VARCHAR	isSeed VARCHAR	seedRank INT	publishedAt INT	channelTitle VARCHAR	channelId VARCHAR	videoCategoryLabel VARCHAR	viewCount INT	likeCount INT	dislikeCount INT	dislikeLikeRatio FLOAT	favoriteCount INT	commentCount INT
NqbzYcuKEgs	Vacina provoca autismo em crianças? Fraude no meio científico!	yes	1	1537387735	Universidade da Química	UCHyeOQ0-Td0Dv3xfI0dwu3g	Education	4068	225	56	0.24888888888889	0	70
VIb2ix9MGgY	VACINAS CAUSAM AUTISMO? Saiba a verdade!	yes	2	1533045602	CBI of Miami	UCuAaB8lLRmoZzOrc_d_Ka0A	Education	7597				0	231
xWV2ndHVPOw	Alumínio presente em vacinas causa autismo? | Drauzio News #26	yes	3	1557928809	Drauzio Varella	UC9zqTTVeClpqMQ5CLuJdWtw	Science & Technology	12757	1800	83	0.046111111111111	0	183
Xe7Fk9Oydl8	Pais decidem não vacinar os filhos por medo das reações que as vacinas podem provocar	yes	4	1505496847	Hoje em Dia	UCN-opsqqDunWO6h5uCp9Y4g	Entertainment	17733	229	47	0.20524017467249	0	407
QTvIYk3GQes	Vacina tríplice viral é suspensa no Amazonas após casos de reações adversas	yes	5	1416442052	tvbrasil	UCSv9d0kQegylHWpP83jWSQg	Entertainment	2906	41	3	0.073170731707317	0	10
cFqsNYSPWVk	Via Legal - Vacina Triplice	yes	6	1282923154	programaViaLegal	UCMMJm4lYxEh7GM4loYh6-SQ	Education	5902	44	4	0.090909090909091	0	46
sIMkL5ZCx54	AUTISMO E VACINAÇÃO - Novas pesquisas	yes	7	1554213453	CBI of Miami	UCuAaB8lLRmoZzOrc_d_Ka0A	Education	675				0	7
XG7VrYA17PA	Uma explicação de uma possível ligação das Vacinas ao Autismo	yes	8	1426268563	Vencer Autismo	UC8b-2BfQ-PpYKESOfEGhYBQ	Education	1726	37	1	0.027027027027027	0	8
ojbT_A-Ju2c	#AUTISMO - VACINAS??? DIETAS????	yes	9	1510504391	SegredosDaLaurinha	UCGILPX9AE6hZpqp1FjFn6pw	People & Blogs	1568	94	19	0.20212765957447	0
4r_MsTUHmv0	AUTISMO E VACINA! - 120segundos 13 | BláBláLogia #SemanaDaVacina	yes	10	1534243610	BláBláLogia	UC3Ooj_iDWELBumIEDejyNHQ	People & Blogs	8720	2131	19	0.008916001877053	0	90
LPACovyBN_Y	As Vacinas Provocam Autismo?	yes	11	1574192447	Dicas do Salgueiro	UChsZDP7pW_08Sk6Tp4U8KJA	Comedy	2709	167	4	0.023952095808383	0	9
VDalbTUtLDA	Saiba como as fake news atrapalham a vacinação contra o sarampo	yes	12	1566219026	RECORD TV	UCu_a6PAzp30Bn2mM-Ll09LA	News & Politics	7308	110	68	0.61818181818182	0	105
YAvL5WThX6w	Vacina do sarampo: a mãe que perdeu 2 filhos por acreditar em fake news	yes	13	1562608773	BBC News Brasil	UCthbIFAxbXTTQEC7EcQvP1Q	News & Politics	12104	998	39	0.039078156312625	0	225
IyIDvLr6_-c	Autismo e vacina SCR (Sarampo caxumba e rubéola)	yes	14	1560092890	Scio Education	UCyuDCBA1ig-x1YeAQBX2b4g	Education	194	7	4	0.57142857142857	0	4
JY0c-1Oibg4	Risco de contaminação deve ser maior que o de tomar vacina diz secretário	yes	15	1516383527	Jovem Pan News	UCP391YRAjSOdM_bwievgaZA	News & Politics	941	23	3	0.1304347826087	0	11
UM_mnIhHOXs	VACINAS FAZEM MAL? Nostalgia Ciência	yes	16	1545400804	Canal Nostalgia	UCH2VZQBLFTOp6I_qgnBJCuQ	Entertainment	1363127	230557	2996	0.01299461738312	0	7802
JzyEmI1Atwk	Baixa cobertura da vacina tríplice viral preocupa os órgãos de saúde!	yes	17	1565979362	PUC TV GOIÁS	UCBx_CluVFNvy0TXsmNBZ-ow	News & Politics	655	8	1	0.125	0	0
wbn_HdpQM5M	O AUTISMO ESTÁ AUMENTANDO ASSUSTADORAMENTE	yes	18	1522594850	Dr. Uronal Zancan	UCVqS-HRwe2vq_Jjgu4fg-UA	Education	12318	1342	30	0.022354694485842	0	196
fnPgNYcl3aY	Autismo alterações mentais lesões neurológicas e vacinas.	yes	19	1447248507	Elcio da Silveira Machado	UCtym0q5w1NeYqVjzSwRntgQ	Education	7393	159	3	0.018867924528302	0	22
2bVyfUTxhcY	Vacinas causam autismo? ( E outras informações importantes)	yes	20	1543257453	Criar e Crescer	UCgbbjw8zPkrmmL_XU1SgJBg	Education	2871	162	41	0.25308641975309	0	37
SETpQB-gbzo	VACINAS CAUSAM AUTISMO?	yes	21	1530798316	O Lado Bom do Mundo	UCnNvQI_yyWPZGI-rqFhR17Q	People & Blogs	434	57	10	0.17543859649123	0	7
E6IjllgpWdc	Vacinar ou não vacinar? Eis a questão! | Fafá Conta	yes	22	1535507430	Fafá conta histórias	UC9fxSdFjcz5QWDEhYCk_k1w	Entertainment	3150	161	24	0.14906832298137	0	25
26FTxfjfjgQ	50 Dúvidas sobre Vacinas + Vacinas para Viagens e Mitos/Verdades sobre Vacinação	yes	23	1561072068	Celso Cavallini	UCl1eRuftjRdetdWkrbeDBGg	Education	8067	1068	51	0.047752808988764	0	45
LE_v0jL_dpk	Médico suspeita que vacina contra o Sarampo pode causar autismo	yes	24	1498423594	ESCUDO pt	UCvLNnnIZdqXYqAS-l8FLJFw	News & Politics	3229	66	7	0.10606060606061	0	24
rXujENBvLoI	VACINAS e sua relação com Autismo	yes	25	1553342412	Juntando as Peças do Autismo	UCf9lX9Vc4CWBUKQxVfZ6MtQ	People & Blogs	517	39	2	0.051282051282051	0	3
U8iUGMthWT4	Esclareça dúvidas sobre a vacina de sarampo	yes	26	1532631601	Ver Mais Londrina	UCGfBE94turq_hyKMxB-Dfrg	People & Blogs	23285	353	33	0.093484419263456	0
IU0FHBDbOS0	Mentira 8 - Conheça 8 mentiras sobre a vacinação	yes	27	1565650259	Ministério da Saúde	UC12zKGLhMhDeDidoctM6BrA	Nonprofits & Activism	664	12	17	1.4166666666667	0	14
uILPKgJp7KU	Espaço Saúde | Vacinas: mitos e Verdades	yes	28	1546886113	Confederação Nacional do Comércio de Bens Serviços e Turismo	UC-4ddcVkyrXXbBqedYV4l9Q	Nonprofits & Activism	873	27	5	0.18518518518519	0	0
iXFdmzAR7KA	Vacinas Podem Causar Autismo? Elas contém Mercúrio?| Lenda ou Fato	yes	29	1495720806	Canal do Schwarza	UCWq1xltHB2fDe6YkYoOrryg	Entertainment	29847	4762	201	0.042209155816884	0	323
vv5HLJVUEz8	Rede antivacina no Brasil traz conspirações dos EUA e cresce com sistema de recomendação do YouTube	yes	30	1561582240	BBC News Brasil	UCthbIFAxbXTTQEC7EcQvP1Q	News & Politics	6031	401	101	0.25187032418953	0	122
aAa_mpeHdbU	Vacina contra Sarampo | Dra Ana Escobar	yes	31	1531945331	Dra Ana Escobar	UCKtJs_zI1yzswHDWqkqHtWw	Education	2443	139	2	0.014388489208633	0	9
nCy5_kUXdeI	Sarampo: Ministério da Saúde envia vacinas para o Norte	yes	32	1530930897	Band Jornalismo	UCoa-D_VfMkFrCYodrOC9-mA	News & Politics	1037	25	3	0.12	0	2
9VAEqQNcRcA	A NOVA REVOLTA DA VACINA - VACINAS NÃO MATAM OLAVO MENTIU	yes	33	1543958100	O Historiador	UC5ZXYxeWlROKbL7JziJ0bIQ	People & Blogs	10329	1794	133	0.074136008918618	0	227
8nMikezRkKw	Documentário sobre a relação Vacina - Autismo	yes	34	1528334656	Andre Chilano	UC-v1PJRoid6DGFzY1jVU3hg	People & Blogs	136	11	0	0	0	0
GTpFmUxvltQ	Vacina contra o sarampo	yes	35	1532105993	UFLA	UCz54U1Ts7JR7ZtSiClcVOOw	Education	2834	30	1	0.033333333333333	0	4
dohuRW3iBRg	VOCÊ DEVE TOMAR A VACINA DA FEBRE AMARELA?	yes	36	1517493438	Dr. Lair Ribeiro Oficial	UCk9mgpQVdJ5oKQWkM1UPBaQ	Entertainment	58878	4339	107	0.024660059921641	0	370
UKO0Lkh4A-c	Detectada Possível Causa do Autismo e Surpresa: Não são as Vacinas | Lenda ou Fato (Hoje é Fato)	yes	37	1533244122	Canal do Schwarza	UCWq1xltHB2fDe6YkYoOrryg	Entertainment	22623	4056	246	0.060650887573964	0	301
gsrNp8MDSoY	Papo Saúde - Verdades e mentiras sobre vacinação.	yes	38	1561406020	Ministério da Saúde	UC12zKGLhMhDeDidoctM6BrA	Nonprofits & Activism	743	38	0	0	0	2
vIfJbB43Ca4	VACINAS MMS E AUTISMO	yes	39	1569963607	CBI of Miami	UCuAaB8lLRmoZzOrc_d_Ka0A	Education	450				0	4
MOXXNX3oQVA	Sarampo avança e SP vai levar vacinas para escolas	yes	40	1563877760	Jovem Pan News	UCP391YRAjSOdM_bwievgaZA	News & Politics	507	17	2	0.11764705882353	0	7
hUvHKz3ugOg	Vacinas valem a pena? (#Pirula 78.1)	yes	41	1398949205	Canal do Pirulla	UCdGpd0gNn38UKwoncZd9rmA	Science & Technology	208146	16992	370	0.021774952919021	0	1234
xFZCZXckG60	Dúvidas sobre a Vacina contra Sarampo | Dra Ana Escobar	yes	42	1532617668	Dra Ana Escobar	UCKtJs_zI1yzswHDWqkqHtWw	Education	105977	206	6	0.029126213592233	0	18
y6FGSQMRSc8	Vacina causa autismo? #DuvidaAleatoria	yes	43	1551565012	Momento Aleatório	UC5o3Raq_jrrSFZ5rkC8uBvw	Entertainment	171	8	3	0.375	0	3
MiIZlSNAu0E	EXISTE PERIGO NA VACINA? | Nerdologia	yes	44	1398951771	Nerdologia	UClu474HMt895mVxZdlIHXEA	Science & Technology	588496	59085	945	0.015993907083016	0	3707
dwUn4OrfovQ	Ministério da Saúde anuncia vacinação contra paralisia	yes	45	1533082917	Band Jornalismo	UCoa-D_VfMkFrCYodrOC9-mA	News & Politics	306	10	0	0	0	1
vrKb_KO8lYw	Saiba mais sobre a vacina contra o Sarampo	yes	46	1393358796	Unimed Fortaleza	UCUtDAMp91VCfHTZ9_ypKRPA	People & Blogs	5839	57	5	0.087719298245614	0	3
GlQBtRqBHXw	Desmistificando as vacinas	yes	47	1533740403	Nunca vi 1 cientista	UCdKJlY5eAoSumIlcOcYxIGg	People & Blogs	796	165	6	0.036363636363636	0	12
j5IZK29WFRs	Vacina causa autismo? | Leonardo Guimarães	yes	48	1563981868	Leonardo Guimarães	UCWo6OpatSyHZijRG_MwObFA	People & Blogs	127	15	0	0	0	5
sQCExa2l5G4	“Vacina homeopática” é investigada	yes	49	1517435164	Jornal da Gazeta	UCNl_i-ggJbZNyOLlhE7yyhw	News & Politics	694	7	2	0.28571428571429	0	1
XkNDv8h_0UQ	Vacina da Gripe? Morte do rim e Neurotoxidade Aguda x Autismo	yes	50	1526663422	Viver com Saúde e Atitude	UCa1o8yRux22rDwRbEjokSPg	People & Blogs	9996	471	16	0.033970276008493	0	32
lADFsGGPDSo	Efeito da vacina contra o HPV pode ser mais amplo do que se pensava | Fernando Maluf	no		1504272023	Jovem Pan News	UCP391YRAjSOdM_bwievgaZA	News & Politics	5720	102	43	0.42156862745098	0	81
TyYDHDe04fg	Cerveja contaminada com Dietilenoglicol leva a óbito . O que é Dietilenoglicol?	no		1578849926	Universidade da Química	UCHyeOQ0-Td0Dv3xfI0dwu3g	Education	29285	2504	49	0.019568690095847	0	180
B_MsnZTHwSQ	Como diagnosticar o autismo na infância | José Salomão Schwartzman	no		1499349601	Drauzio Varella	UC9zqTTVeClpqMQ5CLuJdWtw	Science & Technology	462599	17689	377	0.021312680196732	0	421
AZ6-hDi-mn8	Desafio Químico #3 Compostos de Coordenação (Complexos)	no		1580994000	Universidade da Química	UCHyeOQ0-Td0Dv3xfI0dwu3g	Education	580	113	0	0	0	20
8fsHiYFuaAk	Hacia un nuevo tratamiento del autismo mediante la investigación genética y el escáner... - science	no		1372184922	euronews (en español)	UCyoGb3SMlTlB8CLGVH4c8Rw	Science & Technology	41259	284	12	0.042253521126761	0	26
3sERJkRTA6E	Dr Stone - Descobrindo a Pólvora (Episódio 4)	no		1579377360	Universidade da Química	UCHyeOQ0-Td0Dv3xfI0dwu3g	Education	1529	336	1	0.0029761904761905	0	34
ZxgpbRkVu_Q	Reflexões Químicas - Como se monta um Diagrama de Orbitais Moleculares (Divergência entre livros ...	no		1581275111	Universidade da Química	UCHyeOQ0-Td0Dv3xfI0dwu3g	Education	1117	255	1	0.003921568627451	0	20
QYpd_kHcIXQ	Hataraku Saibou / Cells at Work - A Intoxicação Alimentar (Ep. 4)	no		1579972925	Universidade da Química	UCHyeOQ0-Td0Dv3xfI0dwu3g	Education	814	185	1	0.0054054054054054	0	22
MSA7ItalCQk	Ação das vacinas no corpo humano	no		1553287556	Khan Academy Brasil	UCXj2oSzwg6G0iBjKg33joMQ	Education	38815	1159	89	0.07679033649698	0	183
zrmkS2YR2pE	NÃO TOME A VACINA DA FEBRE AMARELA / PREVENÇÃO DA DOENÇA	no		1521151019	Odilon Cardoso de Farias	UC0LDNBjI8prPXedEj3QosOQ	Howto & Style	3990	358	13	0.036312849162011	0	22
03r6cYgVoEY	Quais são as causas do autismo? Prof. Dr. Lucelmo Laccerda	no		1554073408	Luna ABA	UCk0U1Js-um2lRjSF3VoS_3A	Education	12152	950	10	0.010526315789474	0	67
clP6AmsREjQ	Dr. Sproesser tira dúvidas sobre vacina prevenção e tratamento da gripe	no		1522857342	Hoje em Dia	UCN-opsqqDunWO6h5uCp9Y4g	Entertainment	13657	293	48	0.16382252559727	0	27
IORKEU8oVFg	Posso me VACINAR contra a GRIPE? | Prof. Paulo Jubilut	no		1525384801	Biologia Total com Prof. Jubilut	UCG-eghyORxNrzSG8FkAWKyw	Education	46046	3706	155	0.041824069077172	0	326
HGyLTOS4WgM	10 conceitos de química que te ensinaram errado #UdQLista	no		1546541913	Universidade da Química	UCHyeOQ0-Td0Dv3xfI0dwu3g	Education	12187	1521	7	0.0046022353714661	0	93
qz7hG2IHJC8	Vacinação versus Movimento Anti-Vacina | bloco 2 | Realidade em Pauta	no		1533247202	Revista Novo Tempo	UCcoPc-BqFPkVkkwyS35J-ng	News & Politics	2876				0	1
5ymr8JwOcHw	Dr Lair Ribeiro | AFINAL: QUEM pode ou não pode tomar a VACINA contra a FeBRe AMARELA?	no		1517706300	Junior Hallak Medicina e Saúde	UCPR3gVNYBzi-02_O4noC1Zg	People & Blogs	31223	2049	28	0.013665202537823	0	100
0dDMLSo93kQ	Você sabe como funciona o teste de gravidez?	no		1541865600	Universidade da Química	UCHyeOQ0-Td0Dv3xfI0dwu3g	Education	1373	239	0	0	0	17
OARuMYmmuBo	A vacina da gripe pode matar?	no		1524160679	Ministério da Saúde	UC12zKGLhMhDeDidoctM6BrA	Nonprofits & Activism	9418	73	40	0.54794520547945	0	1
q6P4BtDfUxw	Vacinar os filhos é obrigação | Andrea Rosana Silva | Cabine #16	no		1535565606	Drauzio Varella	UC9zqTTVeClpqMQ5CLuJdWtw	Science & Technology	11975	1635	40	0.024464831804281	0	114
-emUlUIcKZE	ELA TEVE QUE TOMAR TRÊS VACINAS!!!!!	no		1554833687	Familia Jones	UC3PLVO-mt6ZQLiySKdJedCA	Entertainment	420277	32768	347	0.010589599609375	0
gcBLVSnNeH4	Autismo - Como o Lucas falou em 1 semana	no		1532356412	Ação Autismo	UCF8Uaj9cnSkL-63NSPnBVCQ	Education	64282	5932	44	0.0074173971679029	0	236
GCPRAiGLPaQ	LUTO do autismo - da NEGAÇÃO até a ACEITAÇÃO	no		1523025001	Mamãe Tagarela	UCz1xVDltULzUhZCJ1TkvnTQ	People & Blogs	13217	1206	9	0.0074626865671642	0	133
D4v14-KUnws	Tenho GASTRITE E QUEIMAÇÃO Água Com Limão Resolve??? Dr. Lair Ribeiro Responde	no		1548537917	SAÚDE & BEM ESTAR	UCe1XNXkGImWSq5n4wkzNjBw	People & Blogs	196587	10068	131	0.013011521652761	0	598
AU6TygEsQaI	🔴 YAKULT FAZ BEM??? E O Mais Potente Anti-Inflamatório Do Mundo!!! Dr. Lair Ribeiro Responde	no		1546696999	SAÚDE & BEM ESTAR	UCe1XNXkGImWSq5n4wkzNjBw	People & Blogs	987991	51216	711	0.013882380506092	0	1617
nQPv6FKymnc	Microcefalia foi causada por vacinas contra rubéola? - Será que é verdade? #3	no		1457720352	ClickCiência UFSCar	UC9GFu08xsidnYq_qiJlTcug	Science & Technology	492	8	4	0.5	0	2
0N2rqAHsxcs	🔴 Conheça A VACINA CONTRA O CÂNCER!!! E A Dieta Da Sua Cura!!! Lair Ribeiro Responde	no		1545482682	SAÚDE & BEM ESTAR	UCe1XNXkGImWSq5n4wkzNjBw	People & Blogs	12978	1198	12	0.010016694490818	0	50
L-8N_N5RhMI	VÍRUS DA GRIPE!!! SAIBA COMO CURAR!!! E O Sistema Imunológico!!! (Lair Ribeiro)	no		1513429174	SAÚDE & BEM ESTAR	UCe1XNXkGImWSq5n4wkzNjBw	People & Blogs	394354	19701	388	0.019694431754733	0	505
T1ArUvap1NI	Quem pode e quem não pode tomar a vacina contra a febre amarela? Dr. Lair Ribeiro	no		1517431470	O NATURAL É MELHOR	UCwQhAc44SfDvhdCQiHluBVQ	People & Blogs	44107	1199	43	0.035863219349458	0	59
-qGLypXvU_8	Autismo e o Gluten Dr Lair Ribeiro	no		1444228006	O Melhor Para Você	UCVPdtCCsEsem4hyVwS_GzOQ	People & Blogs	22355	678	12	0.017699115044248	0	11
Jxk7hTH54gE	ALERTA! O PERIGO DA VACINA PARA FEBRE AMARELA LAIR RIBEIRO	no		1517432429	RECEITAS E DICAS DE SAÚDE	UCuqsl-IppoFW0uNPQfbXAVg	Entertainment	3345	97	10	0.10309278350515	0	4
0a2BXiKmm5k	Dr Lair fez o teste do celular veja no que deu.	no		1527317197	U MIÓ QUE TÁ TENO	UC4F32QLrpDmmRrozxr9z59g	Science & Technology	431216	21209	624	0.029421472016597	0	1061
2QV5lDKlkAY	Tratamento Extaordinário Para Pressão Alta Dr Lair Ribeiro	no		1550342439	O Melhor Para Você	UCVPdtCCsEsem4hyVwS_GzOQ	People & Blogs	23528	2063	21	0.010179350460494	0	100
IRo4iT9lNog	Médico Dr. Lair Ribeiro Denuncia a Indústria Farmacêutica	no		1501342462	Jorge S	UCv3JgOy__M8B3xsa5adWR6g	People & Blogs	8551	357	8	0.022408963585434	0	29
_5vxASC03bc	De Onde Surge o Câncer? | Dr Lair Ribeiro	no		1542773317	U MIÓ QUE TÁ TENO	UC4F32QLrpDmmRrozxr9z59g	Science & Technology	547249	31526	557	0.017667956607245	0	1833
0x933-A5zfs	AUTISMO: POR QUE OS MÉDICOS NÃO FECHAM DIAGNÓSTICO?	no		1535033169	CBI of Miami	UCuAaB8lLRmoZzOrc_d_Ka0A	Education	11337				0	83
iwjG2F0J8yc	Vacinação Saúde Pública e Liberdade de Escolha	no		1533239398	Biologia Total com Prof. Jubilut	UCG-eghyORxNrzSG8FkAWKyw	Education	62665	5687	91	0.016001406717074	0	291
qbi5EqgorBc	Menino brasileiro que nasceu autista surpreende ao falar só em inglês	no		1486346577	Domingo Espetacular	UCP-Vg2PcmLiWpEdvMI1R35w	Entertainment	7460865	163030	4057	0.024884990492547	0	10895
t-c7P9fORKY	DICAS INTERESSANTES SOBRE DIREITOS DAS PESSOAS COM DEFICIÊNCIA	no		1579035610	CBI of Miami	UCuAaB8lLRmoZzOrc_d_Ka0A	Education	103				0	0
F6q1Iyg9JIs	COMO ESTIMULAR CRIANÇAS SEM BRINQUEDOS E JOGOS	no		1575406804	CBI of Miami	UCuAaB8lLRmoZzOrc_d_Ka0A	Education	271				0	0
hwKzqppYRWk	10 DICAS PARA O TRATAMENTO DO AUTISMO	no		1537279015	CBI of Miami	UCuAaB8lLRmoZzOrc_d_Ka0A	Education	8281				0	39
-PL7_xOMMF0	DICAS PARA MELHORAR O REPERTÓRIO VERBAL DA CRIANÇA	no		1579640401	CBI of Miami	UCuAaB8lLRmoZzOrc_d_Ka0A	Education	163				0	0
szOmMUIenpM	Transtornos depressivos - Módulo de Psiquiatria - Aula SanarFlix	no		1529420411	Medicina Resumida	UCE0KRm8m9_ki8MrMYGyjpAw	Education	17253	674	9	0.013353115727003	0	18
hAZqusCpzQw	Por que estamos tendo um SURTO de SARAMPO?	no		1531421379	Biologia Total com Prof. Jubilut	UCG-eghyORxNrzSG8FkAWKyw	Education	104364	14088	83	0.0058915388983532	0	468
1wSDKt1edlQ	RISPERIDONA NO TRANSTORNO DESAFIADOR OPOSITIVO?	no		1534255444	CBI of Miami	UCuAaB8lLRmoZzOrc_d_Ka0A	Education	34911				0	117
Fm9XHoV5WgU	DICAS PARA UMA GESTAÇÃO SAUDÁVEL	no		1576011602	CBI of Miami	UCuAaB8lLRmoZzOrc_d_Ka0A	Education	77				0	1
IN9kHSEM5z8	Movimento contra vacinação afeta a saúde pública - Conexão - Canal Futura	no		1499445936	Conexão Futura	UCxt_nr6Xwbq4O2Ur9ZBpgAA	People & Blogs	9922	242	76	0.31404958677686	0	171
ZoYr9ef8320	O Olhar do Autista	no		1409194446	Cachalote Documentários	UCykUsChWx0cy2ZRn3r0s5qQ	Film & Animation	86167	1867	46	0.024638457418318	0	60
0UUWs5e8cB0	VACINOSE : Doença secundária à Vacina / Dr. Lair Ribeiro	no		1517505267	Junior Hallak Medicina e Saúde	UCPR3gVNYBzi-02_O4noC1Zg	People & Blogs	25452	1235	29	0.023481781376518	0	93
9-vdD-3-nA4	15 SINAIS de AUTISMO LEVE I MARIA CLAUDIA BRITO	no		1533083243	Dra Maria Claudia Brito	UCFbx6QBTcDI6toOnO-EyajQ	People & Blogs	1916918	82859	2190	0.026430442076298	0	3507
dhqxB-JGswc	Aula Sobre Vacinas - O que você precisa saber?	no		1524611201	Banguela Reversa	UCR9EXU15wObpFMDyQmHXeuw	Education	6171	256	8	0.03125	0	15
ghekXLxPwGE	Existe vacina contra o câncer?	no		1519842149	Olá Ciência!	UCrSM1UV_KLAdTzgxyxl3POw	Science & Technology	2082	283	0	0	0	30
fhhTHOHjg2k	Qual a Diferença das Vacinas dos Posto de Saúde e das Clínicas Particulares	no		1520763880	APAIXONADA MATERNIDADE	UCyjo9Vr-Okmq7OHYyEQHGTQ	People & Blogs	2846	88	4	0.045454545454545	0	7
qNjj1DdXPkk	FUNGOS & AUTISMO	no		1513548227	Dra Tielle Machado	UC4_WOkaSB6TMFad-v0T6qmg	People & Blogs	8466	594	11	0.018518518518519	0	34
Mv993WH6tp4	Onde vacinar? No posto ou na Clínica? - por Evandro Salgado	no		1513382893	Dr. Evandro Salgado	UC7m35AnSXe8aSsBWRCPEQ1g	People & Blogs	2167	298	3	0.01006711409396	0	15
UV8HdWZL6ds	Problemas de memória. Psiquiatra explica as causas.	no		1534550766	Ismael Sobrinho	UCXogxn8ApsdqeXyIDvBWOzg	People & Blogs	10559	1286	12	0.0093312597200622	0
GBA92xU7l8M	Qual deve ser a alimentação dos autistas? | Dr. Juliano Pimentel	no		1486029053	Dr Juliano Pimentel	UCPGGSQfN8LREy6dWdk85fpw	People & Blogs	74242	4196	108	0.025738798856053	0	137
F6QTTtC7cE0	AUTISMO - CURA x SAIR DO ESPECTRO	no		1533223606	Autistologos Autismo	UC2mdv67uDPQO35IYkzK_Xzw	Education	7996	424	7	0.016509433962264	0	48
FTQYa0_oyrg	139 Vacinas Porcarias e as Doenças Autoimunes	no		1527165857	Bruno S. Alves	UCquENngBYGYpHYtN0OVYLKQ	People & Blogs	1723	137	8	0.058394160583942	0	18
rjkUrlKlNdY	Sarampo Pólio e a epidemia de BURRICE	no		1531308389	Professores do Brasil - Prof. Sergio Oliveira	UCvsvFTlOWSFU_RBinLDU7Ow	Education	940	33	31	0.93939393939394	0	17
ThziCUm7zgs	Por que nascem crianças autistas?	no		1498093668	Vinicius Alves	UCrtNrQTDykcrtfYMkggmV5g	People & Blogs	8638	235	9	0.038297872340426	0	6
Cg-Vm6R5XNI	Movimento antivacina é criminoso diz Drauzio Varella	no		1561573310	BBC News Brasil	UCthbIFAxbXTTQEC7EcQvP1Q	News & Politics	45031	3565	265	0.074333800841515	0	1075
E4v2Om5GR6s	CELULAR dá câncer? Ft. DRAUZIO VARELLA 🔵Manual do Mundo	no		1476362008	Manual do Mundo	UCKHhA5hN2UohhFDfNXB_cvQ	Science & Technology	1033604	82039	1623	0.019783273808798	0	3913
aaLAPAaxVuQ	Autismo e desenhos	no		1580997601	Drauzio Varella	UC9zqTTVeClpqMQ5CLuJdWtw	Science & Technology	8451	1171	10	0.0085397096498719	0	27
NWvkpEg1TN0	Sintomas da dengue | Coluna #52	no		1480942801	Drauzio Varella	UC9zqTTVeClpqMQ5CLuJdWtw	Science & Technology	804189	21156	520	0.024579315560597	0	820
Hvte3XpPceQ	Sedentarismo: o pai de todos os males | Coluna #107	no		1552312803	Drauzio Varella	UC9zqTTVeClpqMQ5CLuJdWtw	Science & Technology	501019	68288	627	0.0091817010309278	0	2023
cSG3-7IF4Gc	A importância da vacinação | Temas de Redação	no		1536699604	Aulalivre - Enem 2020 e vestibulares	UC4zG6UeNUn-HM6UEFFkiESA	Education	49356	2896	41	0.014157458563536	0	84
8qkE4P2H5OY	Gastrite nervosa | Drauzio Comenta #24	no		1473688802	Drauzio Varella	UC9zqTTVeClpqMQ5CLuJdWtw	Science & Technology	985736	24660	631	0.02558799675588	0	760
2UKYd-vBV1I	Ansiedade | Rodrigo Bressan (parte 2)	no		1580133601	Drauzio Varella	UC9zqTTVeClpqMQ5CLuJdWtw	Science & Technology	59040	7095	32	0.0045102184637068	0	271
thsBnZyUJns	Síndrome do Pânico | Drauzio Comenta #08	no		1463407205	Drauzio Varella	UC9zqTTVeClpqMQ5CLuJdWtw	Science & Technology	1048724	42593	500	0.011739018148522	0	2448
nWWCFu7m9oM	Causas do Autismo	no		1570835354	NeuroConecta	UCsla1_l383BhIiki4Gj3d8w	People & Blogs	6506	464	6	0.012931034482759	0	14
FvXye0_Cwok	Quem deve tomar a vacina contra o sarampo | Coluna #117	no		1565618403	Drauzio Varella	UC9zqTTVeClpqMQ5CLuJdWtw	Science & Technology	148683	9842	137	0.013919934972567	0	378
RUrjbWOuVhY	Paciente com Alzheimer não pode ser isolado | Coluna #111	no		1558015204	Drauzio Varella	UC9zqTTVeClpqMQ5CLuJdWtw	Science & Technology	31756	3781	18	0.0047606453319228	0	92
TwTFfJbztWo	Comentando comentários (de novo) | Drauzio Comenta #65	no		1503324003	Drauzio Varella	UC9zqTTVeClpqMQ5CLuJdWtw	Science & Technology	558441	79076	294	0.0037179422327887	0	3786
CiK7Gc4U4Ho	É possível contrair dengue mais de uma vez?	no		1578578404	Drauzio Varella	UC9zqTTVeClpqMQ5CLuJdWtw	Science & Technology	7630	1199	7	0.005838198498749	0	39
KoHm4I_epdQ	Dr. Drauzio fala sobre quando pegou febre amarela | Coluna #56	no		1486386002	Drauzio Varella	UC9zqTTVeClpqMQ5CLuJdWtw	Science & Technology	760086	17998	1397	0.07761973552617	0	1176
vzpbzjwlXTU	Diagnóstico de autismo - desconfiança características e pós diagnóstico.	no		1498847342	Aline Vicente	UCA1nC2t2zfzBOySscmpIzGQ	People & Blogs	646415	31950	513	0.016056338028169	0
iEzesXm9Faw	Videoaula | Enfermagem em Imunização	no		1333471274	PortalEducacao	UCI2EhvTADDdOex2nBIRsigw	Education	273890	1982	183	0.092330978809284	0	3
3zTJlC8lAmY	Colesterol e consumo de alimentos | Nágila Damasceno	no		1554386400	Drauzio Varella	UC9zqTTVeClpqMQ5CLuJdWtw	Science & Technology	39987	3953	111	0.028079939286618	0	318
eqw223qTO5Y	Hipotireoidismo | Drauzio Comenta #23	no		1473084005	Drauzio Varella	UC9zqTTVeClpqMQ5CLuJdWtw	Science & Technology	1302889	36061	783	0.021713208175037	0	1014
e-W52pEez20	Depressão na Adolescência e Antidepressivos | Drauzio Comenta #03	no		1454331101	Drauzio Varella	UC9zqTTVeClpqMQ5CLuJdWtw	Science & Technology	1117428	77003	407	0.0052855083568173	0	2754
DP-AqgJ6GMc	Um Outro Olhar #1 | Um recomeço	no		1556632801	Drauzio Varella	UC9zqTTVeClpqMQ5CLuJdWtw	Science & Technology	19061	3172	17	0.005359394703657	0	81
MeC4j-9DiS4	Entenda quais são as vacinas específicas para adultos	no		1511370823	Balanço Geral	UCqZN-NqgP7bhbctbyThSVUA	News & Politics	13998	209	8	0.038277511961722	0	14
rv5HImuSutA	Doses da vacinação contra a hepatite B | Drauzio Comenta #69	no		1506952804	Drauzio Varella	UC9zqTTVeClpqMQ5CLuJdWtw	Science & Technology	79633	3076	41	0.01332899869961	0	143
tJJ5n6NsFcU	Calendário de vacinação - Mulheres (05/03/18)	no		1520284196	Mulheres	UCDtVoSwSwQgwhcC89Nlz5Vg	Entertainment	9225	129	4	0.031007751937984	0	2
ruQ0rLeSeVo	Vacinas e efeito rebanho | Animações #13	no		1569247212	Drauzio Varella	UC9zqTTVeClpqMQ5CLuJdWtw	Science & Technology	17329	3510	19	0.0054131054131054	0	166
Z7z0_yt0Tmk	AULA GRATUITA - Calendário Vacinal de Forma Rápida e Objetiva | Prof. Hygor Elias	no		1564610298	EnfConcursos - Enfermagem para Concursos	UChHd-MU2mOvZHmBQz6zJw_w	Education	70353	3015	69	0.022885572139303	0	101
SCApZjL6i8w	Mitos e Verdades: Vacinação Contra o Influenza - Você Bonita (23/04/18)	no		1524511179	Você Bonita	UCxucJ9P3mLMneYypLZYn2uw	Howto & Style	19676	477	30	0.062893081761006	0	51
f8Xa1zyU25I	Fake news sobre vacinas | Tira-dúvidas com especialista #08	no		1567692009	Drauzio Varella	UC9zqTTVeClpqMQ5CLuJdWtw	Science & Technology	9120	1505	20	0.01328903654485	0	147
3SpiKe04erk	A IMPORTÂNCIA DA VACINAÇÃO | com Drauzio Varella	no		1562860801	Tua Saúde	UCUp-GSUuNxSZ7cxOg7ZnyqA	Science & Technology	13106	871	42	0.048220436280138	0	107
7Zk3aFiPWzk	Cuidado com as pseudociências | Coluna #112	no		1558101601	Drauzio Varella	UC9zqTTVeClpqMQ5CLuJdWtw	Science & Technology	51032	10435	61	0.0058457115476761	0	333
-sLPjn8JMQQ	10 Jeitos Fáceis de Aumentar a Testosterona Naturalmente	no		1536961599	INCRÍVEL	UCIQPHl1WKKTt9KkWyo_JNig	People & Blogs	866861	55902	802	0.014346535007692	0	1200
lyiVh0zuV-k	VACINAS DAS GESTANTES | CALENDÁRIO DE VACINAÇÃO	no		1553504545	Enfermundo	UC8IbAhPglJ1OeC44A_Gtmqg	Education	9315	422	11	0.0260663507109	0	21
2B17yJiUFzc	Autismo açúcar no ferimento e gases | Drauzio Comenta #100	no		1567432801	Drauzio Varella	UC9zqTTVeClpqMQ5CLuJdWtw	Science & Technology	93650	10067	53	0.0052647263335651	0	285
ZXnYHcVmxqk	Um Outro Olhar #2 | Alzheimer	no		1557756006	Drauzio Varella	UC9zqTTVeClpqMQ5CLuJdWtw	Science & Technology	14754	2025	24	0.011851851851852	0	98
lGnonp8-iqU	Viroses infantis | Tira-dúvidas com especialista #11	no		1576159207	Drauzio Varella	UC9zqTTVeClpqMQ5CLuJdWtw	Science & Technology	5466	799	4	0.0050062578222778	0	12
g1de4DvszNU	Lactose - os mitos e verdades a intolerância e a dieta zero lactose	no		1492965668	Doutor TV	UCViYj9umcJZdjKITQrB1D5A	People & Blogs	28114	757	31	0.040951122853369	0	42
OTm3Ww6bBRY	CAUÊ MOURA + DRAUZIO VARELLA | POUCAS #24	no		1555962412	UOL	UCVFbXI6Gu8U2f9Gjtxw4A-Q	News & Politics	332748	31631	484	0.015301444785179	0	1089
nSZ3KFPnuvo	A importância da vacinação	no		1521059084	Criar e Crescer	UCgbbjw8zPkrmmL_XU1SgJBg	Education	6552	307	4	0.013029315960912	0	23
QSSiZIifRLA	Os prejuízos do ácido fólico - Mais Saúde 08/10/18	no		1539095653	Dra. Gisela Savioli - Nutricionista	UCsW2F43izuIFU58yq_anyDA	Education	450492	19679	963	0.048935413384826	0	1893
KgjYMGnV_ak	Tire de sua mesa que é veneno esse ALIMENTO NATURAL -《Dr. Lair Ribeiro》	no		1566272370	U MIÓ QUE TÁ TENO	UC4F32QLrpDmmRrozxr9z59g	Science & Technology	867882	49381	636	0.012879447560803	0	3308
JNymX4Oad5A	Foi chamar o Bolsonaro de MILICIANO e se deu mal! PEGADINHA COM ESQUERDISTAS	no		1557954000	Canal do Ferreira	UCZ4pDPv5kdO_2Da5brOlOZQ	News & Politics	1097747	130108	1485	0.011413594859655	0	12746
Pk_zpyjw0hg	Drauzio IRONIZA frase de Lair Ribeiro em Evento quem será q está com a razão?.	no		1489957056	U MIÓ QUE TÁ TENO	UC4F32QLrpDmmRrozxr9z59g	People & Blogs	1128509	21374	5109	0.23902872649013	0	12193
JHYlMAGdcIE	Consultor de moda dá dicas sobre as tendências para a temporada Primavera-Verão	no		1505496622	Hoje em Dia	UCN-opsqqDunWO6h5uCp9Y4g	Entertainment	1648	41	1	0.024390243902439	0	0
uiTIAlJe4JE	Mulheres - Saúde: Meningite B (19/08/15)	no		1440086612	Mulheres	UCDtVoSwSwQgwhcC89Nlz5Vg	Entertainment	2489	32	2	0.0625	0	1
Aox4-pLaOyA	Rio Tietê transborda e causa transtornos aos motoristas	no		1581349809	Hoje em Dia	UCN-opsqqDunWO6h5uCp9Y4g	Entertainment	490	46	3	0.065217391304348	0	2
X3LxwIDLwNg	Falsa gravidez só é descoberta no aniversário de um ano da suposta criança	no		1502227800	Domingo Espetacular	UCP-Vg2PcmLiWpEdvMI1R35w	Entertainment	13924587	143984	14451	0.10036531836871	0	8823
ql0x_eY3DPQ	Vacina Meningocócica do Posto e do Privado: existe diferença?	no		1506973921	Pediatra na Web	UCnwxA62CqAnW_z0n4WLbp6A	People & Blogs	6522	289	1	0.0034602076124567	0	34
tL4QF9avDts	TOMANDO VACINA DE NOVO... AINDA TEMOS MEDO!!! MAS TEM GENTE PIOR...RSRS	no		1570375802	Gemeas Japonesas	UCJMH8GNRXMjr2uGci28v9_g	People & Blogs	194863	4151	277	0.066730908214888	0
fKhz2YOjU7U	REAÇÕES À VACINA – COMO AJUDAR O SEU BEBÊ | Monica Romeiro	no		1535029208	Almanaque dos Pais	UCy7oVBYY0FGXeeJpy6ITXxQ	People & Blogs	185218	10043	229	0.022801951608085	0	373
GlOaGXP1tPI	Domingo Espetacular conversa com pais que decidiram não vacinar os filhos	no		1502109491	Domingo Espetacular	UCP-Vg2PcmLiWpEdvMI1R35w	Entertainment	96276	1705	154	0.090322580645161	0	2630
xMGVuUg_MJ4	Vacina contra o sarampo - Mulheres (18/07/19)	no		1563484909	Mulheres	UCDtVoSwSwQgwhcC89Nlz5Vg	Entertainment	19232	295	21	0.071186440677966	0	62
nrz6pVyZcp0	Jacaré entra em condomínio pula na piscina e surpreende moradores	no		1580997454	Hoje em Dia	UCN-opsqqDunWO6h5uCp9Y4g	Entertainment	1310	93	5	0.053763440860215	0	4
uybOwXoU6yU	Toledo: bebê de três meses morre após tomar vacina	no		1524162665	Balanço Geral Oeste	UCDes47D0_xrzOm_r7b9RQAQ	People & Blogs	7314	78	6	0.076923076923077	0	32
NMF-26U0yOg	9 Sintomas de Meningite que Todos Deveriam Saber	no		1515039560	INCRÍVEL	UCIQPHl1WKKTt9KkWyo_JNig	People & Blogs	445555	17656	341	0.019313547802447	0	681
sqFOgtDzu7g	REAÇÕES DAS VACINAS	no		1470102175	WELIDA DANCINI	UCORRcj9wv5DEYCEg2LhBcLQ	People & Blogs	54733	590	72	0.12203389830508	0	54
FOrZXG-6DG4	Que movimento é esse ANTIVACINA?	no		1534254720	Canal Futura	UC2mmP8ysfyko40KSn90x6Og	Education	10416	567	36	0.063492063492063	0	374
nT9Z4VsMLTg	Dia de Vacina	no		1557014405	Tia Dani	UCR2IONXExRWEGxREw7lXHCQ	People & Blogs	6765143	46598	13786	0.29584960727928	0
nwUNkro2Oc4	Vacina DTP (Tríplice Bacteriana) - Profa. Juliana Mello	no		1559490411	ENFrente Enfermagem Continuada	UCD9kk0EUEtflrRl6TV0lDyA	Education	3214	266	1	0.0037593984962406	0	20
SRM7eLrTEEc	Duas mortes por reação à vacina	no		1516401712	Jornal da Gazeta	UCNl_i-ggJbZNyOLlhE7yyhw	News & Politics	12054	154	10	0.064935064935065	0	50
VVgGNj-PRVU	Vacinar é proteger: a importância da vacinação e os perigos da não imunização	no		1499115844	Ministério da Saúde	UC12zKGLhMhDeDidoctM6BrA	Nonprofits & Activism	12632	160	8	0.05	0	1
5dijNX4HYz4	Reações às vacinas: a resposta do corpo	no		1554903557	Ministério da Saúde	UC12zKGLhMhDeDidoctM6BrA	Nonprofits & Activism	8823	123	12	0.097560975609756	0	9
W6P88q72ero	Sobre as novas Vacinas da Meningite	no		1439597357	MaterniArte	UCZmc8QllMtE-fr51p1niyjw	Entertainment	3518	63	3	0.047619047619048	0	6
cWiFBhX4ld8	Mãe luta para que tratamento de primeiros socorros seja obrigatório nas escolas	no		1516985760	Hoje em Dia	UCN-opsqqDunWO6h5uCp9Y4g	Entertainment	7169	276	9	0.032608695652174	0	14
t30LZWZpfY0	Vacina dos 3 meses+Reações|casada e mãe aos 22	no		1522768397	Jéssica Machado	UC8CYH-5VBNcMj9wta4W8cPw	Entertainment	8299	186	13	0.06989247311828	0	16
HPvzpT_9Hhk	Os tipos e tratamentos de meningite | Momento Papo de Mãe	no		1528970403	Papo de Mãe TV Cultura	UCQdOZmbeT9UoQy8G3zeNE-g	Entertainment	1602	51	2	0.03921568627451	0
NOB7WETZJ00	Saiba por que a vacina contra o HPV é importante	no		1483980611	vejapontocom	UCV6Ue4o5UIeKQ3IEkjnXRlg	News & Politics	8245	170	14	0.082352941176471	0	13
jYvsnY30t2w	Calendário de Vacinação ATUALIZADO!!! (PNI)	no		1552695021	Anii G.	UCq8ChnGCYMVCzDgGMK9e91A	Science & Technology	174147	9187	345	0.037553064112333	0	460
II3imb_xVeM	Poliomielite - Você Bonita (17/07/18)	no		1531851311	Você Bonita	UCxucJ9P3mLMneYypLZYn2uw	Howto & Style	4376	110	1	0.0090909090909091	0	2
ky6eCkeuksY	Mãe relata como foi a reação de bebe após receber vacina	no		1510078199	Balanço Geral Itajaí	UCyvhqROV3luJvtt2dLTFhAA	People & Blogs	17850	166	15	0.090361445783133	0	31
8jTEpEx9a_M	Vacina tríplice viral: sarampo caxumba e rubéola devem ser prevenidas também na fase adulta	no		1402927916	Minha Vida	UCMYTIyqS1-7wT-3pBB8bR5A	Science & Technology	56165	472	40	0.084745762711864	0	21
QSpPhj5HiWI	Vacinação contra a gripe - Você Bonita (09/04/19)	no		1554833688	Você Bonita	UCxucJ9P3mLMneYypLZYn2uw	Howto & Style	17806	441	28	0.063492063492063	0	94
MiC6Oc0y7I4	VLOG - VACINAS DE 2 MESES + REAÇÕES | STEFANY RAGO	no		1554339905	Stefany Rago	UCOcG-EPdn2gsWVuMpF1TRVA	News & Politics	10311	551	8	0.014519056261343	0	58
LopjODuH_O8	AULA VACINA DTP | Calendário de vacinação infantil | Parte 13	no		1545158809	Enfermundo	UC8IbAhPglJ1OeC44A_Gtmqg	Education	8429	364	5	0.013736263736264	0	11
VTG8o6TxOjk	EXPECTATIVA VS REALIDADE TOMANDO VACINA	no		1510084803	Gustavo TV	UCT0ECF7TihWahDqpU2i9tQA	Entertainment	2583224	31839	3978	0.12494110995948	0
RWiYOx5FV_E	Enchente invade casas e moradores tentam salvar os móveis	no		1581349698	Hoje em Dia	UCN-opsqqDunWO6h5uCp9Y4g	Entertainment	174	11	2	0.18181818181818	0	1
aX5yDUtHY48	TOMAMOS 9 VACINAS EM UM DIA - ROTINA COM OS GÊMEOS GALVÃO	no		1551304800	Yasmin Galvão	UCOQ_KwPhg3IZbigiK7NCnfQ	People & Blogs	298312	16448	455	0.027662937743191	0
V0SeOi9ZWj4	Meu bebê não ganha peso. O que fazer?	no		1567515610	Dra Luciana Herrero	UC0nblCDJx75fBCDDqTCKHaQ	Education	14281	1623	18	0.011090573012939	0	87
o-rDqlq-q5s	Mulher do cantor Sorocaba precisará repor o ferro durante a gravidez	no		1581000808	Hoje em Dia	UCN-opsqqDunWO6h5uCp9Y4g	Entertainment	8533	390	12	0.030769230769231	0	21
fpQ5P5wVTWY	Vacina da Febre Amarela - Tomar ou Não? • Dr. Alexandre Feldman	no		1516826526	Alexandre Feldman	UCi2zMfox-UpFGAFfsMXqYfQ	Science & Technology	112930	3362	271	0.080606781677573	0	245
a3p5rGrotNc	Saiba mitos e verdades sobre a vacina contra H1N1 – CN Notícias	no		1461937633	TV Canção Nova	UCVrKQMmA2ew9LFzeIDaOFgw	Entertainment	30642	301	70	0.23255813953488	0	0
m6XH3c1uz7M	Especialista fala dos efeitos colaterais da vacina da gripe	no		1337363478	Jovem Pan News	UCP391YRAjSOdM_bwievgaZA	News & Politics	102496	718	181	0.25208913649025	0	311
PnF0X7gY4io	DANIEL BECKER RESPONDE - VACINAR OU NÃO OS FILHOS? - CRIAR E CRESCER	no		1473255251	Criar e Crescer	UCgbbjw8zPkrmmL_XU1SgJBg	Education	17331	748	40	0.053475935828877	0	88
LzBWxm3BCCc	Primeira vacina contra Meningite B é apresentada em São Paulo - CN Notícias	no		1430943842	TV Canção Nova	UCVrKQMmA2ew9LFzeIDaOFgw	Entertainment	4514	46	2	0.043478260869565	0	0
tcog3wvskek	Reações às vacinas: como evitar	no		1554907782	Ministério da Saúde	UC12zKGLhMhDeDidoctM6BrA	Nonprofits & Activism	7282	52	13	0.25	0	0
ZfqwKtmzXkU	VACINAS REAÇÕES 4°MÊS	no		1561035782	Dicas Lara Ferreira	UC4JEf2ejgucNsmsFiEy0mSw	People & Blogs	40552	3892	43	0.011048304213772	0	227
HZESKn92hno	Mães não querem vacinar os filhos por medo de efeitos colaterais	no		1496169127	Balanço Geral	UCqZN-NqgP7bhbctbyThSVUA	News & Politics	4082	74	22	0.2972972972973	0	89
9aGM1OrW2Is	Quadrilha de estelionatários que falsificava assinaturas é presa no RJ	no		1581083176	Hoje em Dia	UCN-opsqqDunWO6h5uCp9Y4g	Entertainment	789	52	2	0.038461538461538	0	1
duiI2RyeY4c	LEVAMOS A BEBÊ PARA VACINAR | Priscila Simões	no		1540128281	Priscila Simões	UCyE4KeQg54Bx34LxQB22xkw	People & Blogs	125422	19137	158	0.0082562575116267	0	516
5TuBArbnPwU	Uma vacina contra o câncer	no		1544118643	Dr. Lair Ribeiro Oficial	UCk9mgpQVdJ5oKQWkM1UPBaQ	Entertainment	55081	5768	37	0.0064147018030513	0	234
LEmxXprE_sg	A TÃO TEMIDA VACINA DE 2 MESES ALICE TEVE REAÇÃO FEBRE E MUITO CHORO | VLOG	no		1544126401	Mari Cavilha	UCOS_wL35NuMn8qLASOQqfUQ	People & Blogs	104517	14591	447	0.030635323144404	0
-3VyfFNAM8g	Polícia descobre refinaria de drogas no interior de São Paulo	no		1581083645	Hoje em Dia	UCN-opsqqDunWO6h5uCp9Y4g	Entertainment	554	20	2	0.1	0	1
inkU5oHd750	MEU FILHO NÃO COME!	no		1489586404	Criar e Crescer	UCgbbjw8zPkrmmL_XU1SgJBg	Education	94612	5044	85	0.016851704996035	0	356
M9vTSPBz034	BEBÊ TOMOU A VACINA DE 3 MESES VARRENDO NOSSO APÊ E MAIS | VLOG	no		1547064005	Mari Cavilha	UCOS_wL35NuMn8qLASOQqfUQ	People & Blogs	177111	22352	1049	0.046930923407301	0
HDWPA6RlV5c	Minha experiência de quase morte com a vacina da febre amarela	no		1516541415	Patricia Bencardini	UCRlrE2ZyiPLyS61pgJCIoUA	Comedy	73959	1866	118	0.063236870310825	0	465
x9D807nQ2Bs	Veja como foi a recepção dos brasileiros que chegaram da China	no		1581344860	tvbrasil	UCSv9d0kQegylHWpP83jWSQg	Entertainment	548	112	0	0	0	5
RTXayn256VA	Jair Bolsonaro faz reuniões com diversos ministros	no		1581345430	tvbrasil	UCSv9d0kQegylHWpP83jWSQg	Entertainment	829	155	1	0.0064516129032258	0	3
bx9Z_jAaTEI	Atualização - Rede de Frio	no		1362757216	Somos Enfermagem TV	UCL41BsrnhsSSXG4zYwqC95g	Education	105880	1304	73	0.055981595092025	0	41
LqgsTvOD3Ac	Fabricantes de cigarros têm 30 dias para responder ação da AGU	no		1581122522	tvbrasil	UCSv9d0kQegylHWpP83jWSQg	Entertainment	197	12	1	0.083333333333333	0	4
2uDTvwA6S9c	BNDES vende R$ 22 06 bilhões em ações da Petrobras	no		1581122579	tvbrasil	UCSv9d0kQegylHWpP83jWSQg	Entertainment	506	38	0	0	0	5
_PCW9jbf_AU	A transformação do menino Arthur no jogador Zico	no		1581304531	tvbrasil	UCSv9d0kQegylHWpP83jWSQg	Entertainment	904	90	5	0.055555555555556	0	3
QD29yQloxHc	Gabriel Gonti se apresenta no Fique Ligado confira aqui	no		1581120239	tvbrasil	UCSv9d0kQegylHWpP83jWSQg	Entertainment	71	3	0	0	0	0
tllSN0P6Epc	Conheça os sintomas do transtorno de ansiedade generalizada	no		1581122572	tvbrasil	UCSv9d0kQegylHWpP83jWSQg	Entertainment	1067	58	0	0	0	0
JoI8NdsgeMc	Conheça o programa Startout Brasil que conecta startups com o mundo	no		1581346987	tvbrasil	UCSv9d0kQegylHWpP83jWSQg	Entertainment	58	2	0	0	0	0
cRmJqRavNYI	Landim: Resolver indenizações do Ninho será igual ganhar um título	no		1581358854	tvbrasil	UCSv9d0kQegylHWpP83jWSQg	Entertainment	51	7	0	0	0	0
O7sJUe-Tda4	Começa campanha de vacinação contra o sarampo em todo o país	no		1581345897	tvbrasil	UCSv9d0kQegylHWpP83jWSQg	Entertainment	63	4	0	0	0	1
-JwX1jVwj_s	Repórter Brasil 07/02/2020	no		1581120283	tvbrasil	UCSv9d0kQegylHWpP83jWSQg	News & Politics	1635	81	0	0	0	2
q4fefy5szMA	Receita abre consulta a lote residual do IRPF de 2008 a 2019	no		1581347466	tvbrasil	UCSv9d0kQegylHWpP83jWSQg	Entertainment	119	4	0	0	0	1
ENGdIpb_830	Mãe cria aplicativo inspirado nas necessidades da filha autista	no		1581127178	tvbrasil	UCSv9d0kQegylHWpP83jWSQg	Entertainment	472	20	1	0.05	0	2
NA6q7tVe814	Teatro Amazonas se firma como uma das principais atrações de Manaus	no		1581120503	tvbrasil	UCSv9d0kQegylHWpP83jWSQg	Entertainment	321	9	0	0	0	2
zEJpUV6M93c	Video 360 Eurofarma | Remédio Lugano	no		1476407684	Agência Casa Mais	UCcnuou4Sjm-qF87yzWve1ug	Entertainment	5199	53	6	0.11320754716981	0	3
p8iX1ch7QH4	Incêndio do Ninho do Urubu do Flamengo completa um ano	no		1581123138	tvbrasil	UCSv9d0kQegylHWpP83jWSQg	Entertainment	428	14	0	0	0	1
JCuEwTsn-jQ	Moradores de Belo Horizonte continuam em alerta por conta das chuvas	no		1581122140	tvbrasil	UCSv9d0kQegylHWpP83jWSQg	Entertainment	442	10	1	0.1	0	0
nl0JhFXTgw0	Vacina tríplice bacteriana: previna-se de tétano difteria e coqueluche	no		1401721024	Minha Vida	UCMYTIyqS1-7wT-3pBB8bR5A	Science & Technology	34405	277	14	0.050541516245487	0	7
K-2D1vK7UCU	Coronavírus: projeto de lei para repatriação de brasileiros é aprovado	no		1581120188	tvbrasil	UCSv9d0kQegylHWpP83jWSQg	Entertainment	191	12	0	0	0	0
ibU743D6I0k	Dia “D” | Vacinação contra poliomielite e sarampo	no		1415637171	Ministério da Saúde	UC12zKGLhMhDeDidoctM6BrA	Nonprofits & Activism	29030	168	23	0.13690476190476	0	0
6aDadkJMtTY	Reações às vacinas: o uso de medicamento	no		1554907782	Ministério da Saúde	UC12zKGLhMhDeDidoctM6BrA	Nonprofits & Activism	2362	29	1	0.03448275862069	0	0
Hl_hLlKEGsA	Orientações na Vacina BCG	no		1432214782	Tele Educa Mato Grosso	UC9gmqJKNBOyCl2KLdJIv0mQ	Science & Technology	31396	285	32	0.11228070175439	0	1
F2Mhpo9X1qE	Lista de espera do Sisu será divulgada hoje	no		1581346301	tvbrasil	UCSv9d0kQegylHWpP83jWSQg	Entertainment	169	6	1	0.16666666666667	0	1
2LpRCkWdeU8	Rio quer vacinar 3 milhões de pessoas contra o sarampo até março	no		1581120729	tvbrasil	UCSv9d0kQegylHWpP83jWSQg	Entertainment	139	5	1	0.2	0	0
hVpX38rGTss	Remédio Milagroso para tratar Caxumba ou Papeira.	no		1477740052	Vanessa Leal	UCq7xmFdlNNXgCRIq7G-5RxQ	Entertainment	177148	4770	199	0.041719077568134	0
LjlCl1xnXts	Oscar 2020 em destaque no Sem Censura	no		1581359175	tvbrasil	UCSv9d0kQegylHWpP83jWSQg	Entertainment	18	0	0		0	0
bHx4h10n4TQ	Verdade das vacinas sujas revelada	no		1275673466	aphomeopatiaTV	UCTGVdd_qB7Rz4X4oAKZ0kyg	People & Blogs	56329	419	19	0.045346062052506	0	38
M52Decf4qJ0	Dicas de como baixar febre	no		1406820079	Josilma Salviano	UC01Os2Eeg6MCABfv384yKyQ	People & Blogs	76125	383	92	0.2402088772846	0	30
fF53D9Pteo0	O Governo e a Mídia MENTEM. AS VACINAS CAUSAM DOENÇAS E DANOS AO SISTEMA IMUNOLÓGICO.	no		1395003851	Capixaba Otário	UCNMwzMh0MW_J_nK9kMS4ldg	People & Blogs	25547	397	33	0.083123425692695	0	114
IJ-XIFNX3pI	Gabriela Rocha - Estás Comigo - Ensaio	no		1335019192	Gabriela Rocha	UC4t2mdI8uAiJDJSRjiWJT1Q	Music	2232500	12574	298	0.023699697789089	0	748
1kp2M6pKqVk	Posso me vacinar gripado?	no		1524164476	Ministério da Saúde	UC12zKGLhMhDeDidoctM6BrA	Nonprofits & Activism	23902	227	12	0.052863436123348	0	5
BBumt4RY9z8	Mitos e Verdades sobre a Vacina da gripe e suas reações	no		1524488401	Almanaque dos Pais	UCy7oVBYY0FGXeeJpy6ITXxQ	People & Blogs	17415	1040	20	0.019230769230769	0	136
3JgsA8yBijQ	Preparação da vacina	no		1478882995	Master D Portugal	UC1RnMyP-HfZCyMLX0TmyMTg	Education	46273	307	57	0.185667752443	0	9
8yXrZNalMAU	METADE DAS CRIANÇAS TERÁ AUTISMO EM 2025 POR CAUSA DOS AGROTÓXICOS	no		1558048483	Dr. Uronal Zancan	UCVqS-HRwe2vq_Jjgu4fg-UA	Education	44861	3571	59	0.016521982637917	0	339
2TUkO_KU--I	#31 - Reação da vacina 😭	no		1532560660	Pai_xao Vlogs	UCXQatvGsVCzrm35PnxoHJsA	People & Blogs	13515	2122	26	0.012252591894439	0
rrwMjvUiqaY	AUTISMO COMPORTAMENTO	no		1359773239	TEA Vamos Falar Sobre Autismo	UCl01kak5i66hCdS_bCxkkgA	People & Blogs	733470	1930	425	0.22020725388601	0
jZAqT-eAZd4	É perigoso usar estatinas? Real custo x benefício desse remédio.	no		1534184115	Meu Coração Saudável	UC49x20RykBnDY1RFHkdDnsw	People & Blogs	16126	1171	70	0.059777967549103	0	33
Kq5LGBxPzPA	Sarampo: Está com a vacina em dia? Campanha vai começar!	no		1531935747	Balanço Geral Joinville	UCWX70TFNwDsBLYlRzOe_-zw	People & Blogs	703	9	4	0.44444444444444	0	2
oUWswSgGs9I	Vacinação e Autismo	no		1522703627	Pediatria Do Estilo de Vida	UC1_-z9fMYofIUQWYUPoNyTw	People & Blogs	455	18	10	0.55555555555556	0	10
jn_QgiJOf6M	GRIPE FEBRE E O XAROPE QUE MATAVA PESSOAS | Dr Lair Ribeiro	no		1552435024	U MIÓ QUE TÁ TENO	UC4F32QLrpDmmRrozxr9z59g	Science & Technology	258948	16804	202	0.012020947393478	0	876
eiFnWYDopXo	aberta a temporada de caça ao DR LAIR RIBEIRO	no		1507431610	Encarando o Sobrenatural Oficial	UCyhRfD3HkB-0VbFA1prxjxw	People & Blogs	408465	36043	762	0.021141414421663	0	3101
iaN2iYYUfLk	Vacina - tríplice viral	no		1522160833	Donaldo Bezerra	UCplIRjNdaKLVrAS4D-Dil7Q	People & Blogs	122	0	1		0	0
mNab1gzIy1o	MTV Autismo - Documentário	no		1309044000	Fernando Channoschi	UCV9EVCVbJus_StqIJ89ajLA	Entertainment	151644	1374	25	0.018195050946143	0	81
gGXoEyd_OPU	Conheça a menina Laura que tem síndrome de Asperger « Programa Especial	no		1278354623	tvbrasil	UCSv9d0kQegylHWpP83jWSQg	Nonprofits & Activism	214366	1519	46	0.030283080974325	0	34
aRwMKUdnOBI	QUAIS SÃO OS SINAIS DE AUTISMO AOS 6 MESES?	no		1533650302	CBI of Miami	UCuAaB8lLRmoZzOrc_d_Ka0A	Education	9282				0	24
i1GX2nXST-c	Marcos Mion e a nova Lei para os autistas sancionada pelo Presidente Jair Bolsonaro	no		1563660509	Jair Bolsonaro	UC8hGUtfEgvvnp6IaHSAg1OQ	News & Politics	51990	12551	51	0.0040634212413354	0	784
NGNrrMMr8vc	O QUE É DIETA SENSORIAL?	no		1536847032	CBI of Miami	UCuAaB8lLRmoZzOrc_d_Ka0A	Education	4145				0	10
tGvqF3jnDlk	DICAS SOBRE PSICOLOGIA POSITIVA	no		1574197207	CBI of Miami	UCuAaB8lLRmoZzOrc_d_Ka0A	Education	224				0	0
r_9l8NYR1g8	As pesquisas mais avançadas em autismo no mundo - com Alysson Muotri Ph.D	no		1555681456	Luna ABA	UCk0U1Js-um2lRjSF3VoS_3A	Education	7125	619	12	0.019386106623586	0	44
-RaoItg-IK4	HIPERATIVIDADE INFANTIL	no		1275998753	renanrob	UCLxU3sH6BpHnqDRBXgGmUPw	Education	27213	207	12	0.057971014492754	0	17
9qpkXVa_BJE	DIETA PARA TRATAMENTO DO AUTISMO FUNCIONA?	no		1534860181	CBI of Miami	UCuAaB8lLRmoZzOrc_d_Ka0A	Education	11218				0	70
KDvO89lRKAM	Dicas para pais - autismo	no		1462185719	Andréa Werner	UC3lP5c55UE0ozG-uN0uBsXg	People & Blogs	40468	2144	24	0.011194029850746	0
XeFXSETAbNM	Autismo - Como identificar autismo em adultos?	no		1539007267	Mundo Autista	UCqF3BLbPXpNGNgsV3oJvDlw	People & Blogs	51605	2043	59	0.028879099363681	0	191
uz0U3bn3zCk	Autismo Regressivo	no		1474923706	Mayra Gaiato	UC42k7FI53tnSSIjgzW-rbLA	Education	19905	2189	19	0.0086797624486067	0	87
duKSeqxO4ww	Invaginação intestinal Julia Leão	no		1440227955	Leonardo Leao	UCGTfGu7XEakOH2wL1Si2rqA	Entertainment	7577	92	11	0.1195652173913	0
g_x_MtYzJ1g	Lei assegura benefícios às pessoas com autismo nas áreas de saúde e educação	no		1358422368	TV SUPREN	UCAJAbdjUtxGM9zaD_epYpcA	News & Politics	34182	652	20	0.030674846625767	0	18
lhFPFRjBO8U	Autismo clássico é uma inflamação no cérebro?	no		1526490276	Biologia Digital	UCRuR7ytSs0YokBvxr8rM3ZQ	Education	1289	96	2	0.020833333333333	0	17
kKVCAVc5b78	DIAGNÓSTICO de Autismo do Eric - Como desconfiamos e descobrimos o AUTISMO LEVE	no		1516822201	Mamãe Tagarela	UCz1xVDltULzUhZCJ1TkvnTQ	People & Blogs	19431	1028	13	0.012645914396887	0	50
jI0AaLMzmxs	Os Sinais do Autismo	no		1496232142	Carla Ulliane	UCA2llkURdTm63bBB3nTBw1w	People & Blogs	503450	15798	630	0.039878465628561	0	916
REfNVmdh0Uk	Bobocas anpóficos	no		1556914759	Olavo de Carvalho	UC6RQhzm93SterWntL7GzqYQ	Comedy	324647	48426	1469	0.030334944038327	0	3329
YEZ3RoHlrEc	Neuropediatra explica como age remédio para TDAH	no		1347127838	TDAH - Ciência e Aprendizagem	UCLHpzj63LeJ-IoRSGB3V2fg	Education	113934	1580	59	0.037341772151899	0	171
DmH_2GT6VeA	Denise Carreiro: Ninguém nasce autista	no		1430138158	NAMU	UCPCwZ6sP0cAwgMsGZ23rOYA	Howto & Style	28548	815	67	0.082208588957055	0	131
danXx84ray8	ADOÇANTES CAUSAM CÂNCER?!	no		1438727401	Caio Bottura	UCepEtTIMTtU-MbFHz-pOZMw	Entertainment	24903	2568	30	0.011682242990654	0	168
z5pANj3DfpY	Algumas informaçãoes sobre o autismo	no		1452673658	Diário de um autista	UCbhT_vtlwr7X2wG6q_0mWVQ	People & Blogs	6950	1085	2	0.0018433179723502	0	45
prlTBT0bARE	A vacina da gripe pode causar reação?	no		1554931262	Record News	UCuiLR4p6wQ3xLEm15pEn1Xw	News & Politics	48862	539	101	0.1873840445269	0	223
86ujEynQSVU	ÁREA 51: O ESCONDERIJO DOS ET S	no		1563816614	MyNews	UCUM4-KGZEXC2pk6zRDL9jMQ	News & Politics	4605	337	17	0.050445103857567	0	22
HFkAtaXdCdQ	Caracteristicas do Autismo (Leves e Severos)	no		1408288759	Débora Francelino	UCOqOdxzU58qOGoysdnVXd9Q	People & Blogs	558038	8118	552	0.0679970436068	0	430
M0svOfmcczI	H2O Meninas Sereias 2 Temporada Episodio 7 Em Água Quente Dublado	no		1487814458	H2O Meninas Sereias	UCpuW6sUUE2Y0xW-KZhm347A	People & Blogs	2065602	36038	1240	0.034408124757201	0	1910
YGXzFR0OcnQ	Olavo de Carvalho ANTI VACINAS O astrólogo guru de Bolsonaro	no		1547481709	falandoverdades.com.br	UCRfUfNEJVaY8AbAcb46qX0g	News & Politics	1890	36	15	0.41666666666667	0	31
VzAlj6DPhGg	AUTISMO: Transtorno do Espectro Autista | NeuroSaber	no		1423093457	NeuroSaber	UCghJZXv-Cg90zgdeTZCt_-A	Entertainment	259786	8429	177	0.020998932257682	0	372
yG7zV2vHFdo	AUTISMO - SINTOMAS CAUSAS E TRATAMENTOS	no		1398291118	Wiki GLOBAL Pédia	UCYfLDf9dRO6SW0hO2nPewrw	People & Blogs	78782	999	54	0.054054054054054	0	39
iTrbWxkX_ms	Autismo - Visão Espírita (01/04/2016)	no		1459537919	TV Mundo Maior	UCkrcoalvMERq3ehh5gH5j0Q	Entertainment	139632	4143	254	0.061308230750664	0	245
RBzNKPxNiTQ	Autismo: teoria e prática	no		1452046403	Eli Vieira	UCil8_HWnWScf4Xmt4FSdU7w	Science & Technology	29607	734	16	0.021798365122616	0	42
d8zoCo67Qp8	Quando o Autismo não era tão evidente - breve relato sobre alguns sinais - NÓS E O AUTISMO	no		1471311259	Nós e o Autismo	UC-WaPlIfAQP3IuydN6dhbhA	People & Blogs	49576	1165	55	0.047210300429185	0	88
JFwAsQ7Bt54	Autismo Começa no Estômago - Cura e Prevenção	no		1434718198	LiberdadeNatural	UC1LRaE3XaXAanf1XJXgrVIw	Education	65801	2474	173	0.069927243330639	0	226
Fd5i-CJmhjs	COMO DESINTOXICAR SEU CORPO!!	no		1380597596	Ivandélio Sanctus	UCdKg0aioEqn_tbfBGz_ltFw	People & Blogs	964835	15068	609	0.040416777276347	0	2510
w6DduVyJjso	Crianças QUE NÃO LEVAM A VACINA NÃO TÊM AUTISMO	no		1531822742	Atalaia De Yeshua	UC3vZWDAhX5356m17Vy1B2GA	People & Blogs	1245	140	6	0.042857142857143	0	28
snEknNLtd8k	VACINAS–ATENÇÃO MUNA–SE DE INFORMAÇÃO	no		1463494121	Verdades Ocultas e Inconvenientes!	UCsAMQ6_-iRdEWBVh8q-IXmA	People & Blogs	5500	181	4	0.022099447513812	0	16
0ZYfsAYLtM8	Noni - 1 Segredo que você precisa saber.	no		1509113951	Maravilhas Di Noni	UCT913ORodTxCG9HdXroYPtQ	People & Blogs	60398	2733	160	0.058543724844493	0	163
bbO34r-BSbc	Novo tratamento para autismo | Edson Pacheco | TEDxJardinsSalon	no		1424468398	TEDx Talks	UCsT0YIqwnpJCM-mx7-gSA4Q	Nonprofits & Activism	81273	2809	99	0.035243859024564	0	246
LVjvX8bWno4	Como saber se o seu filho está no Espectro Autista? | Momento Papo de mãe	no		1510131601	Papo de Mãe TV Cultura	UCQdOZmbeT9UoQy8G3zeNE-g	Entertainment	22964	563	20	0.035523978685613	0
4Xb4n7aINh8	Diagnóstico de autismo quais características que desconfiei.	no		1507069940	SegredosDaLaurinha	UCGILPX9AE6hZpqp1FjFn6pw	People & Blogs	1139307	35533	1330	0.037429994652858	0
AU6m_pShjAY	Superação da Laura 💙	no		1566949122	SegredosDaLaurinha	UCGILPX9AE6hZpqp1FjFn6pw	People & Blogs	7937	478	11	0.023012552301255	0	60
YGpqGFZr_Ls	Mitos e verdades: o assunto de hoje é vacinas	no		1527184357	Programa Ver Mais Oeste	UC5hGM-gAk5I8zmn8xUKuNkw	People & Blogs	72	4	0	0	0	1
_ayYtYkQXmY	#AUTISMO - Como superei a fase da negação luto até chegar na aceitação !	no		1508860987	SegredosDaLaurinha	UCGILPX9AE6hZpqp1FjFn6pw	People & Blogs	37523	1584	29	0.018308080808081	0
RZmKXZoUKpY	3 milhões de crianças ainda não tomaram vacina contra sarampo e pólio	no		1535694835	Jornal da Record	UCmpHPgeCBgvk_fDXZQKsnAA	News & Politics	7602	70	11	0.15714285714286	0	0
wKMaZieG8KI	Papo com Mãe: Como Descobri o Autismo e o que Fiz!	no		1510583248	Mayra Gaiato	UC42k7FI53tnSSIjgzW-rbLA	Education	49258	2858	33	0.011546536039188	0	105
i4rbB9Q7fr8	Volta as Aulas - como se preparar para escola e escola para receber o Aluno.	no		1580431417	SegredosDaLaurinha	UCGILPX9AE6hZpqp1FjFn6pw	People & Blogs	295	28	0	0	0	1
7-L2NIosLz0	Pote da Calma	no		1506788320	SegredosDaLaurinha	UCGILPX9AE6hZpqp1FjFn6pw	People & Blogs	5163	225	6	0.026666666666667	0
hIytkbRz0n4	Tinus Smits: Vaccini e Autismo	no		1380963376	conmarc	UCGuv-PMjNhYc9wyZFr15ASg	Science & Technology	3126				0
G0aOdDnoreI	Novidade para Dia das Crianças #ficadica🎁💅🏻	no		1569016532	SegredosDaLaurinha	UCGILPX9AE6hZpqp1FjFn6pw	People & Blogs	2245	171	3	0.017543859649123	0	28
hRPdQpU7NbA	Um Só Mundo Documentário Autismo	no		1397459506	Vivendo a Inclusão	UCqALeERk6OhLGaG_PIG_RJA	People & Blogs	285707	6998	133	0.019005430122892	0	391
KkGbL2wTkwQ	Tratamento com homeopatia	no		1395153524	TVTEC Jundiaí	UCO5eykNr9w8p5eoGQz3AFfg	Entertainment	5042	78	2	0.025641025641026	0
W8cAkwxstss	Alfabeto	no		1564526005	SegredosDaLaurinha	UCGILPX9AE6hZpqp1FjFn6pw	People & Blogs	1432	111	2	0.018018018018018	0	24
1mDvH5GU5Ms	Sinais de autismo em bebês	no		1504559021	Andréa Werner	UC3lP5c55UE0ozG-uN0uBsXg	People & Blogs	515692	13294	325	0.024447119001053	0
F73lbO-gZJQ	Apresentação de Ballet - “A História que eu não escrevi”.	no		1577305448	SegredosDaLaurinha	UCGILPX9AE6hZpqp1FjFn6pw	People & Blogs	598	65	0	0	0	2
OFkLSzHnA1k	Natal 🎅 abrindo os presentes 🎁 olha que presentão Papai Noel deixou 😱	no		1578267012	SegredosDaLaurinha	UCGILPX9AE6hZpqp1FjFn6pw	People & Blogs	571	44	1	0.022727272727273	0	0
xFW2NkwSDMY	Atividade Psicomotora com pareamento de cores	no		1581291518	SegredosDaLaurinha	UCGILPX9AE6hZpqp1FjFn6pw	People & Blogs	147	23	0	0	0	2
tGvIT4NvhqQ	Aniversário da Laura #Laurafez04 🎁🎂🎉🎀🎈💙	no		1579049407	SegredosDaLaurinha	UCGILPX9AE6hZpqp1FjFn6pw	People & Blogs	904	67	1	0.014925373134328	0	17
zdmcHpC_deU	Bosque 05 - Terapia Cease	no		1490718205	Bosque Oriri	UC2qRcwgwOLchPYFPqCCHVhQ	People & Blogs	1281	42	1	0.023809523809524	0	3
t6HiEHcBbk8	Portfolio da Laura #escola.	no		1581027174	SegredosDaLaurinha	UCGILPX9AE6hZpqp1FjFn6pw	People & Blogs	233	41	1	0.024390243902439	0	2
Px7qv-XkQxo	AUTISMO - O QUE VOCÊ DEVERIA SABER	no		1532564060	Qvida Boa	UCJIKKHplhnzcDmpztqUO7nA	People & Blogs	7710	853	14	0.01641266119578	0	133
6g4PmZrEbTA	Autismo em Evidências - Apresentação e primeiro pronunciamento	no		1510546854	Autismo em Evidências	UCJUhAFvFypnG_E7vWimQQYw	Nonprofits & Activism	2027	115	4	0.034782608695652	0	22
4txrPUCUmu4	COMO CURAR 90% DAS INFLAMAÇÕES ! IVANDÉLIO SANCTUS	no		1402963568	Ivandélio Sanctus	UCdKg0aioEqn_tbfBGz_ltFw	People & Blogs	1065690	17197	1068	0.062103855323603	0	1304
KJBrTZiqPag	Autismo e homeopatia	no		1489701046	Amarilys Toledo Cesar	UC5xF-T4J_uM0NrCkOO5e0PQ	People & Blogs	3113	96	5	0.052083333333333	0	23
TaBrsDdt-z8	O que aconteceria com quem viajasse no tempo? | Nerdologia	no		1534430736	Nerdologia	UClu474HMt895mVxZdlIHXEA	Science & Technology	569599	69188	567	0.0081950627276406	0	1554
ILQoi0ZVnq4	ARANHAS PEIDAM? SQP 6 | BláBláLogia	no		1578060004	BláBláLogia	UC3Ooj_iDWELBumIEDejyNHQ	People & Blogs	3429	759	10	0.013175230566535	0	25
m5FXxUZ16ao	OVO ou A GALINHA? - 120segundos 03 | BláBlálogia	no		1524499055	BláBláLogia	UC3Ooj_iDWELBumIEDejyNHQ	People & Blogs	8213	1695	8	0.0047197640117994	0	105
yVlSGmmIF4U	UNICÓRNIOS PEIDAM? SQP 11 | BláBláLogia	no		1581086531	BláBláLogia	UC3Ooj_iDWELBumIEDejyNHQ	People & Blogs	2185	503	2	0.0039761431411531	0	34
-5kxXhv7r7A	Museus irados! | Nerdtour Rússia	no		1534433682	Jovem Nerd	UCmEClzCBDx-vrt0GuSKBd9g	Entertainment	253774	20783	134	0.00644757734687	0	544
vdDAawDIGgo	Por que aves são dinossauros e pterossauros não são? (#Pirula 261)	no		1534108979	Canal do Pirulla	UCdGpd0gNn38UKwoncZd9rmA	Science & Technology	175283	19696	166	0.0084281072298944	0	1248
8xS8L5A1Zcg	PEIXES PEIDAM? SQP 4 | BláBláLogia	no		1576763887	BláBláLogia	UC3Ooj_iDWELBumIEDejyNHQ	People & Blogs	3178	697	4	0.0057388809182209	0	25
UP2vSGXK0UY	POR QUE ELEFANTES TEM ORELHAS TÃO GRANDES? 120segundos 49| BláBláLogia	no		1576681207	BláBláLogia	UC3Ooj_iDWELBumIEDejyNHQ	People & Blogs	4635	1122	2	0.0017825311942959	0	35
G3aze7ECbPU	BRIDGE: Jogo de baralho sem sorte! | #BoaTemática 40 | Blablálogia	no		1533225292	BláBláLogia	UC3Ooj_iDWELBumIEDejyNHQ	People & Blogs	9589	780	9	0.011538461538462	0	39
SlsHN-OWCkw	Revolta da Vacina | Nerdologia	no		1534255202	Nerdologia	UClu474HMt895mVxZdlIHXEA	Science & Technology	231119	27740	156	0.0056236481614996	0	1325
etxhPWG4g48	Tríplice Viral - Prof. Hygor Elias | DicaENF	no		1529841603	EnfConcursos - Enfermagem para Concursos	UChHd-MU2mOvZHmBQz6zJw_w	Education	8266	191	9	0.047120418848168	0	3
GVZ_YGr2m5o	Por que existem ingredientes tóxicos nas vacinas? | Minuto da Terra	no		1464703200	Minuto da Terra	UCB0zinWfy-dS_NqcOINYo3A	Science & Technology	133142	8055	64	0.0079453755431409	0	196
9Ujp1z38ggw	BURACOS NEGROS PEIDAM? SQP 2 | BláBláLogia	no		1575644411	BláBláLogia	UC3Ooj_iDWELBumIEDejyNHQ	People & Blogs	3425	802	7	0.0087281795511222	0	36
V9mUzKVpWzQ	SOLUÇO! - 120segundos 14 | BláBláLogia	no		1534544061	BláBláLogia	UC3Ooj_iDWELBumIEDejyNHQ	People & Blogs	7822	1603	6	0.0037429819089208	0	36
yX-_O6Nkwmc	MEDULA! - 120segundos 11 | BláBláLogia	no		1533638990	BláBláLogia	UC3Ooj_iDWELBumIEDejyNHQ	People & Blogs	8927	1606	5	0.0031133250311333	0	73
g6h35inNHWU	BALEIAS PEIDAM? SQP 3 | BláBláLogia	no		1576249210	BláBláLogia	UC3Ooj_iDWELBumIEDejyNHQ	People & Blogs	3233	742	9	0.012129380053908	0	22
d5alV7W-Rbc	Um Passo Mais Perto da Vacina da AIDS [Mural de Notícias]	no		1534466813	Mural Científico	UC0ABb9XMjG8M_rmxbxtW6Qw	Science & Technology	7770	289	24	0.083044982698962	0	30
gGKOiyme7rI	O segredo do sucesso dos dinossauros (#Pirula 260)	no		1533914626	Canal do Pirulla	UCdGpd0gNn38UKwoncZd9rmA	Science & Technology	152716	18023	160	0.0088775453587083	0	872
TYJicd-0j78	Vamos Tocar o Sol - Guia do Espaço S02E17 | Bláblálogia	no		1533913093	BláBláLogia	UC3Ooj_iDWELBumIEDejyNHQ	People & Blogs	3801	872	2	0.0022935779816514	0	25
3QujLRhKiow	GIRAFAS PEIDAM? SQP 5 | BláBláLogia	no		1577458387	BláBláLogia	UC3Ooj_iDWELBumIEDejyNHQ	People & Blogs	3503	578	2	0.0034602076124567	0	34
mhe5e2B9bL8	Machine Learning: como ensinar uma máquina a aprender | Nerdologia Tech	no		1535637605	Nerdologia	UClu474HMt895mVxZdlIHXEA	Science & Technology	306595	34850	171	0.0049067431850789	0	670
HAf-Ggtfr0M	APROVEITANDO MELHOR O OXIGÊNIO! - SlowNews 7	no		1476806291	BláBláLogia	UC3Ooj_iDWELBumIEDejyNHQ	People & Blogs	22135	3783	15	0.0039651070578906	0	78
tMTk5OVMkDc	POR QUE MONTAMOS ÁRVORES DE NATAL? 120segundos 50 | BláBláLogia	no		1577195272	BláBláLogia	UC3Ooj_iDWELBumIEDejyNHQ	People & Blogs	3222	855	2	0.0023391812865497	0	28
csgd5OCd3_U	Os Rapanui - Curiosity 28 | BláBlálogia	no		1512479414	BláBláLogia	UC3Ooj_iDWELBumIEDejyNHQ	People & Blogs	86245	9095	86	0.0094557449147883	0	367
tUjSyGuprTs	Vacinas são mesmo perigosas pra você? | Minuto da Terra	no		1466776805	Minuto da Terra	UCB0zinWfy-dS_NqcOINYo3A	Science & Technology	173195	9483	82	0.0086470526204788	0	424
o5knNdjtCS4	VACINAS | Notícias da Garagem	no		1534514405	Dragões de Garagem	UCbrt8UdV49AqgT7-VaXmlwQ	Science & Technology	1170	206	2	0.0097087378640777	0	10
o6r7sc9WTYg	POR QUE SOMOS DIFERENTES? - 120segundos 05 | BláBláLogia	no		1526312302	BláBláLogia	UC3Ooj_iDWELBumIEDejyNHQ	People & Blogs	7363	1594	10	0.0062735257214555	0	63
Bdr5V1eI4po	BOCEJO! - 120segundos 10 | BláBláLogia	no		1529338652	BláBláLogia	UC3Ooj_iDWELBumIEDejyNHQ	People & Blogs	7184	1547	3	0.0019392372333549	0	55
v6LnPz7P09c	RAIOS CÓSMICOS ATINGEM TRIPULANTES EM VOO? EP. 333	no		1535042387	Aviões e Músicas	UCLXl1V6n82Dyg1VhVgSL0nw	Science & Technology	178227	35891	220	0.0061296703909058	0	815
2p9vqg8_Hsk	Por que existe gente antivacinas? (OU: o tempo algoz das memórias) (#Pirula 267)	no		1538103407	Canal do Pirulla	UCdGpd0gNn38UKwoncZd9rmA	Science & Technology	126844	17986	321	0.017847214500167	0	1703
DUgE8y3gflQ	A HISTÓRIA DA INFORMAÇÃO - Há Ideia 1 | BláBláLogia	no		1533830402	BláBláLogia	UC3Ooj_iDWELBumIEDejyNHQ	People & Blogs	4630	987	6	0.0060790273556231	0	53
UiYhn2bAiBM	VACINANDO UM PAÍS TODO | BláBláLogia #SemanaDaVacina	no		1534515201	BláBláLogia	UC3Ooj_iDWELBumIEDejyNHQ	People & Blogs	3877	812	6	0.0073891625615764	0	25
8E3OYxxTN1A	As vacinas e o autismo	no		1541067152	Pediatria para Todos	UCsYo9r-JIEkhoRoc9G5gdpQ	People & Blogs	267	4	0	0	0	0
UEvjtTtJPrk	A PÁSCOA! | Canal do Slow #24	no		1459180348	Canal do Slow	UCl10NIdDOn9MMWdKNyo_YdA	People & Blogs	53482	6294	38	0.0060374960279631	0	262
BPKG_l2NcGc	O Dia em que Criamos um Segundo Sol na Terra	no		1535048916	Ciência Todo Dia	UCn9Erjy00mpnWeLnRqhsA1g	Science & Technology	1531239	161236	1670	0.010357488402094	0	4535
gMezTlCp88M	A FALSA REPRESENTATIVIDADE! | Canal do Slow	no		1457645487	Canal do Slow	UCl10NIdDOn9MMWdKNyo_YdA	People & Blogs	44222	6701	38	0.0056707954036711	0	353
80oI-ZbYsUY	ATORES QUE FORAM LONGE DEMAIS POR UM PAPEL	no		1534276815	Refúgio Cult	UCflCE9dixPqeC_EaSqQAqrw	Entertainment	222490	12080	186	0.015397350993377	0	592
LJfnAXscLEM	Um NOVO incomoda muita gente	no		1535147100	Ideias Radicais	UC-NwgkrLPYmzM-xoLr2GX-Q	Education	113387	14773	897	0.060718879036079	0	2073
V9DcNJT1-Dk	3 Teorias Sobre o que Existe do Lado de Fora do Universo | AstroPocket	no		1534808904	Canal do Schwarza	UCWq1xltHB2fDe6YkYoOrryg	Entertainment	299282	36742	493	0.013417886886941	0	1482
lQ9ZXA-NmSw	VACINAS NÃO CAUSAM AUTISMO	no		1534188172	Autistologos Autismo	UC2mdv67uDPQO35IYkzK_Xzw	Education	248	16	2	0.125	0	3
6hvAciLsm-Y	Cientistas Conseguem INVERTER Seta do TEMPO Em Experimento | AstroPocket	no		1534194000	Canal do Schwarza	UCWq1xltHB2fDe6YkYoOrryg	Entertainment	98148	15540	319	0.020527670527671	0	493
_u3_qShtWXg	UFÓLOGOS E AS TEORIAS SOBRE NIBIRU by Milena Souza	no		1581130573	FLAVIO VALLE	UCstACT0WwMpTjTrbpFYk16Q	Entertainment	8455	913	56	0.061336254107338	0	58
RPYqZcPKTWY	Os Meus PIORES MOMENTOS na TV (Passei Vergonha!)	no		1545596611	Dicas do Salgueiro	UChsZDP7pW_08Sk6Tp4U8KJA	Sports	46217	2455	17	0.0069246435845214	0	72
PwyYYFKWEAg	Gaming Bliss - G-SYNC on LG OLED TVs!!!	no		1574625613	Linus Tech Tips	UCXuqSBlHAE6Xw-yeJA0Tunw	Science & Technology	976603	30549	663	0.021702838063439	0	2840
QBn-KgavNQo	JOÃO COUTO - CASTING 02 - IDOLOS 2015 AUDITION	no		1429740449	IDOLOS	UCDlVDJqYqHYEcgHRn8Mf25g	Entertainment	51881	253	6	0.023715415019763	0	26
PYxW9v0LW20	MITOS DA SAÚDE com Prof. António Vaz Carneiro | PODCAST #26	no		1556145368	Dicas do Salgueiro	UChsZDP7pW_08Sk6Tp4U8KJA	Sports	11877	543	5	0.0092081031307551	0	21
fokyS8KVC6c	Autismo: causas sintomas diagnóstico tratamento	no		1508347319	Canal USP	UCN1ihdoKXeixzYi7Hyp4WwQ	Education	62554				0	29
4sE9RzUTE8I	MATTHIAS HUES - O Vilão Mais Simpático de Hollywood! (PODCAST)	no		1581285611	Dicas do Salgueiro	UChsZDP7pW_08Sk6Tp4U8KJA	Sports	1200	84	1	0.011904761904762	0	6
M6ghTWrjGws	5 Melhores Exercícios Para OMBRO (Hipertrofia)	no		1517776640	Dicas do Salgueiro	UChsZDP7pW_08Sk6Tp4U8KJA	Sports	70993	2784	33	0.011853448275862	0	52
uON6EpG-RRE	A Dieta Cetogénica Vale a Pena?	no		1573753237	Dicas do Salgueiro	UChsZDP7pW_08Sk6Tp4U8KJA	Comedy	4695	206	6	0.029126213592233	0	52
E2PtvsZska8	Plano Treino Hipertrofia - Dia 2 Costas e Bicep! /Bodybuilding Plan - Day 2 Back and Biceps	no		1484684867	Dicas do Salgueiro	UChsZDP7pW_08Sk6Tp4U8KJA	People & Blogs	205838	3944	66	0.016734279918864	0	97
cD3JiJhpYus	FIZ OS TESTES DOS ATLETAS! - Velocidade Impulsão (salto) e Potência	no		1574627401	Dicas do Salgueiro	UChsZDP7pW_08Sk6Tp4U8KJA	Comedy	8976	494	6	0.012145748987854	0	10
mgQjMmdaC4g	SOU UM ÁS DO PARKOUR!	no		1504033762	Dicas do Salgueiro	UChsZDP7pW_08Sk6Tp4U8KJA	People & Blogs	22827	1073	10	0.0093196644920783	0	57
flRC2eSzrTM	ANOMALY - Misfits Podcast #66	no		1574101800	Misfits Podcast	UC6OUstIo-qXiJzcsJ0toz-A	Comedy	1150483	58862	359	0.0060990112466447	0	3918
TUxuGMn0bYQ	COMO PERDER GORDURA com Teresa Manafaia | PODCAST #10	no		1536100752	Dicas do Salgueiro	UChsZDP7pW_08Sk6Tp4U8KJA	Sports	27677	1033	11	0.010648596321394	0	32
N3r87AZEKN8	Os Esteróides (Testosterona) - Entrevista ao Salgueiro JORNAL TVI	no		1568977205	Dicas do Salgueiro	UChsZDP7pW_08Sk6Tp4U8KJA	Sports	107654	4023	85	0.021128511061397	0	315
djAiqIUtvBE	SALGUEIRO vs PAULO MUZY! (Batalha Épica)	no		1575998021	Dicas do Salgueiro	UChsZDP7pW_08Sk6Tp4U8KJA	Science & Technology	4689	316	10	0.031645569620253	0	8
DzMZHpuYIhQ	Edison e Telma - Labaredas do Espírito	no		1237951142	Jailson Miranda	UCDK5XAOArmsSQKZ_kBoYKOA	Music	205957	1031	29	0.028128031037827	0	91
3c1ihIE4HmM	WORKSHOP de CROSSFIT / TREINO FUNCIONAL! (LIVE)	no		1510271035	Dicas do Salgueiro	UChsZDP7pW_08Sk6Tp4U8KJA	Sports	26339	1591	9	0.005656819610308	0	39
p9lJGvne6YQ	SER MAIS CRIATIVO! - Jel Nuno Duarte - PODCAST #16	no		1544136751	Dicas do Salgueiro	UChsZDP7pW_08Sk6Tp4U8KJA	Sports	14136	605	9	0.014876033057851	0	35
llM77oAAZcU	Os Meus Objectivos Físicos Para 2018!	no		1515953287	Dicas do Salgueiro	UChsZDP7pW_08Sk6Tp4U8KJA	Sports	18929	1104	11	0.009963768115942	0	106
V_US5WbW-54	A Melhor Técnica de Agachamento! (LOW BAR vs HIGH BAR)	no		1574022614	Dicas do Salgueiro	UChsZDP7pW_08Sk6Tp4U8KJA	Comedy	6307	396	2	0.0050505050505051	0	23
lL3neR0ShcM	As Dietas a Ciência e as TRETAS! | PODCAST #39	no		1573258006	Dicas do Salgueiro	UChsZDP7pW_08Sk6Tp4U8KJA	Comedy	21419	717	23	0.03207810320781	0	34
bJ5X6Vp84Zo	Não vacinar crianças faz com que doenças consideradas erradicadas voltem a atingir a população	no		1533577479	TV BrasilGov	UCjaWLFTNqLkq3ZY2BJ4NYRg	News & Politics	957				0
U_uzIeM22j8	O Meu Plano de Treino Completo - Dia C	no		1525882168	Dicas do Salgueiro	UChsZDP7pW_08Sk6Tp4U8KJA	Sports	20891	1082	13	0.012014787430684	0	53
8-gWyXUYS3k	ワクチン副作用、６３人提訴 子宮頸がん、１５～２２歳女性	no		1469611633	KyodoNews	UCwJXtk_1CKlCrh7YJDP2uPw	News & Politics	58609	281	59	0.20996441281139	0
sWB_062VDbE	O MEU CUT - Tudo o que como no Dia-a-dia (Vlog)	no		1528308388	Dicas do Salgueiro	UChsZDP7pW_08Sk6Tp4U8KJA	Sports	100711	3384	57	0.016843971631206	0	188
Cl5VkdA_1cE	Treino Completo de SACO DE BOXE! (Cardio e Explosão)	no		1578857400	Dicas do Salgueiro	UChsZDP7pW_08Sk6Tp4U8KJA	Sports	6294	648	4	0.0061728395061728	0	36
lK_UXScIp_s	ESTOU GORDO?! COMO ASSIM??	no		1505418535	Dicas do Salgueiro	UChsZDP7pW_08Sk6Tp4U8KJA	People & Blogs	47411	2948	22	0.0074626865671642	0	110
B-AAF9lGpgc	MAIS MÚSCULO MENOS GORDURA com Paulo Fernandes | PODCAST #13	no		1540420654	Dicas do Salgueiro	UChsZDP7pW_08Sk6Tp4U8KJA	Sports	41464	1551	20	0.012894906511928	0	38
c37mTacAB5s	OS MELHORES TREINOS DE 2019! (Instagram do Salgueiro - MOTIVACIONAL)	no		1577997004	Dicas do Salgueiro	UChsZDP7pW_08Sk6Tp4U8KJA	Entertainment	7233	448	4	0.0089285714285714	0	23
7KA5WITjb4k	HOMEM MAIS FORTE DE PORTUGAL - Fábio Silva - PODCAST #22	no		1550618735	Dicas do Salgueiro	UChsZDP7pW_08Sk6Tp4U8KJA	Sports	14790	627	4	0.0063795853269537	0	16
S-cEmac2zUc	Como Comunicar e Viver Melhor! | PODCAST #37	no		1571180309	Dicas do Salgueiro	UChsZDP7pW_08Sk6Tp4U8KJA	Comedy	11203	702	3	0.0042735042735043	0	30
L7mqGx8cA7w	O Salgueiro Careca?!! NUNCA!!	no		1563132601	Dicas do Salgueiro	UChsZDP7pW_08Sk6Tp4U8KJA	Sports	15614	778	16	0.020565552699229	0	24
YXqNLj1jvaQ	FAZER DIETA EM 2020 | PODCAST #44	no		1579824282	Dicas do Salgueiro	UChsZDP7pW_08Sk6Tp4U8KJA	Sports	11966	490	6	0.012244897959184	0	19
gMc9tDFGI9U	LIVESHOW DICAS DO SALGUEIRO - ESPECIAL 4 ANOS DAS DICAS!	no		1507845640	Dicas do Salgueiro	UChsZDP7pW_08Sk6Tp4U8KJA	Sports	28871	1719	15	0.0087260034904014	0	30
LojtTO2i_pg	Treina Como um Atleta Profissional! | PODCAST #38	no		1572393123	Dicas do Salgueiro	UChsZDP7pW_08Sk6Tp4U8KJA	Comedy	15782	690	9	0.01304347826087	0	12
naALcit1jlQ	TRANSFORMAÇÕES CORPORAIS com João Mimoso | PODCAST #4	no		1524783387	Dicas do Salgueiro	UChsZDP7pW_08Sk6Tp4U8KJA	Sports	21640	1009	10	0.0099108027750248	0	26
fv-Ai9x8saU	FELIPE FRANCO e SÉRGIO CHORÃO | PODCAST #32	no		1563751131	Dicas do Salgueiro	UChsZDP7pW_08Sk6Tp4U8KJA	Sports	31918	2034	20	0.0098328416912488	0	45
yDqenyuskJA	MELHOR DO PODCAST #1 - Dietas Atropelamentos e Sofrimento!	no		1551292313	Dicas do Salgueiro	UChsZDP7pW_08Sk6Tp4U8KJA	Sports	7582	427	3	0.0070257611241218	0	13
SzJ5JPygCvo	O TREINO DE CROSSFIT com Bruno Militão | PODCAST #8	no		1531263673	Dicas do Salgueiro	UChsZDP7pW_08Sk6Tp4U8KJA	Sports	23809	801	26	0.032459425717853	0	25
X7mB-ziEPpQ	SER ATLETA DE MMA com Pedro Carvalho | PODCAST #31	no		1562799504	Dicas do Salgueiro	UChsZDP7pW_08Sk6Tp4U8KJA	Sports	21043	903	10	0.011074197120709	0	25
L-dms7ipF-k	O Ultimo Dragão Bruce Leroy! (PODCAST com Taimak)	no		1579473011	Dicas do Salgueiro	UChsZDP7pW_08Sk6Tp4U8KJA	Entertainment	1978	98	0	0	0	18
sdh0GuR_-k8	SEDE DE VENCER com Rui e Nuno Pavanito | PODCAST #7	no		1530228034	Dicas do Salgueiro	UChsZDP7pW_08Sk6Tp4U8KJA	Sports	26811	842	14	0.016627078384798	0	24
7Pp8cbmWPQ0	CALA-TE E TREINA! David Chan e Paulo Santana | PODCAST #11	no		1538088142	Dicas do Salgueiro	UChsZDP7pW_08Sk6Tp4U8KJA	Sports	14942	552	2	0.0036231884057971	0	19
MQQmd2gU3Kw	SEM DESCULPAS com Tiago Sousa | PODCAST #27	no		1557441066	Dicas do Salgueiro	UChsZDP7pW_08Sk6Tp4U8KJA	Sports	6159	319	1	0.0031347962382445	0	9
6kRlc0tV1uU	PATRÍCIA MAMONA - Os Segredos de uma Campeã! | PODCAST #24	no		1553297040	Dicas do Salgueiro	UChsZDP7pW_08Sk6Tp4U8KJA	Sports	9365	448	4	0.0089285714285714	0	6
eGUf1cBkRD8	PAULO MUZY - O REGRESSO! | PODCAST #29	no		1559085758	Dicas do Salgueiro	UChsZDP7pW_08Sk6Tp4U8KJA	Sports	76477	2157	50	0.023180343069077	0	63
YAfpY0YLgMM	PODCAST #3 - ARMAS DE FOGO & TRIATLO	no		1519252604	Dicas do Salgueiro	UChsZDP7pW_08Sk6Tp4U8KJA	People & Blogs	11666	634	7	0.011041009463722	0	19
luVeT1NjqbE	Conformidade Social - O Experimento em uma sala de espera	no		1460201376	acvitorio	UCaEplKvlFhyg7P3eBmRtyCQ	People & Blogs	118630	1494	29	0.019410977242303	0	36
ns4rY-ZEWGE	APLICOU E TEVE RESULTADO EM 48 HORAS!!	no		1573855206	Lucas Pinheiro	UCzYrkkCI1yvqvQyD-j56RIA	Sports	46802	9189	42	0.0045706823375775	0	207
xsCf6QdATQg	5 FAMOSOS COM AUTISMO (E QUE VOCÊ NÃO FAZIA IDEIA!)	no		1495387801	VAI UMA MÃOZINHA AI?	UClcatj2SigXMklFrqQtnA-Q	People & Blogs	165570	5969	318	0.053275255486681	0	325
XvUyPRgHcY8	Vacinação infantil e autismo: Existe alguma relação?	no		1541427996	CCATES	UCmV27tf2iqUZDDtXiShSKUg	Science & Technology	165	5	4	0.8	0	0
2RV4NaG5a5U	Queimadas na Amazônia chocam o mundo	no		1566784052	Domingo Espetacular	UCP-Vg2PcmLiWpEdvMI1R35w	Entertainment	93055	2221	149	0.067086897793787	0	542
ofFb1CBkMPM	Você e o Doutor explica tudo sobre o sarampo	no		1564590927	Hoje em Dia	UCN-opsqqDunWO6h5uCp9Y4g	Entertainment	73656	1472	76	0.051630434782609	0	44
pkIFdGw5myI	Tudo o que você precisa saber sobre o sarampo	no		1565805704	TV Aparecida	UCfYrK5JU5EznsnK3wQE7iIg	Entertainment	10077	178	10	0.056179775280899	0	9
qvG0irvya8k	Tratamento pode ter curado paciente do vírus HIV	no		1551899233	Record News	UCuiLR4p6wQ3xLEm15pEn1Xw	News & Politics	13389	365	10	0.027397260273973	0	31
xEcZiBZ_Bqc	Uma armação pode ter colocado José Luiz atrás das grades por tráfico de drogas	no		1581046850	RECORD TV	UCu_a6PAzp30Bn2mM-Ll09LA	News & Politics	2112	71	0	0	0	0
hccg0i27AHc	VACINAÇÃO DO IDOSO | SÉRIE SAÚDE BRASIL	no		1465411571	Tv Saúde Brasil	UC4MWeXk20bRyIGQsiZXPe6Q	Education	8188	123	12	0.097560975609756	0	8
DULzIpTW9TA	Profissional de saúde - Saiba como identificar e prevenir o sarampo	no		1535119929	Ministério da Saúde	UC12zKGLhMhDeDidoctM6BrA	Nonprofits & Activism	41444	632	47	0.074367088607595	0	22
PKqyuLpoO-8	Bebê fica na UTI após contrair sarampo da mãe	no		1565967100	Hoje em Dia	UCN-opsqqDunWO6h5uCp9Y4g	Entertainment	10539	288	14	0.048611111111111	0	26
S4QEEbQCjeE	CRISE DA VACINAÇÃO NO BRASIL: PREVENÇÃO DE DOENÇAS E SAÚDE PÚBLICA | Atualidades e Tema de Redação	no		1534255794	Curso Enem Gratuito	UC_53VGoH_0XLFmYVpGMvhvg	Education	24361	794	36	0.045340050377834	0	72
MAi8Beg8Tdk	Entenda como ocorre a transmissão do vírus do sarampo	no		1566208664	Câmera Record	UCp6tx5isUZCgQnvEwbOVC-Q	People & Blogs	5971	213	8	0.037558685446009	0	30
D4NMNsGw4Mw	Nova campanha de vacinação contra o sarampo começa nesta segunda (7)	no		1570465030	Hoje em Dia	UCN-opsqqDunWO6h5uCp9Y4g	Entertainment	4426	61	4	0.065573770491803	0	2
LImubYDcAfA	Movimento anti vacinação vem provocando a volta de doenças já erradicadas e epidemias	no		1393339031	Jornalismo TV Cultura	UCXdXYG8dUmEv6jhEji_lSHg	News & Politics	7938	151	20	0.13245033112583	0	0
iCoBbzfFZXw	Tire todas as dúvidas sobre o sarampo e a campanha de vacinação	no		1563991555	Catraca Livre	UCv2svvDbMNunUuPs8hUUKVA	News & Politics	74880	1325	105	0.079245283018868	0	88
TP-7tk1hOxs	VACINAS NO BRASIL | DOSE DE ATUALIDADES | DESCOMPLICA	no		1571580002	Descomplica	UCT0JugAtGmqiYkwxFZOwAtg	Education	80679	8887	44	0.0049510520985709	0	212
WolGMQihlcU	ROTINA + ARRUME-SE COMIGO PARA FESTA DO DIA 7 DE SETEMBRO - CHAYLLA ALAX	no		1568049466	Vlog Da Chaylla Alax	UCJWBZ_U49wLgqS5fefJ7STw	People & Blogs	40071	2496	129	0.051682692307692	0
Z934SrUHvLs	Vacinação contra o sarampo é prorrogada até sábado (31) em SP	no		1567103047	Hoje em Dia	UCN-opsqqDunWO6h5uCp9Y4g	Entertainment	6385	67	7	0.1044776119403	0	6
KwUTREs8g0k	Crianças de 6 meses um ano devem se vacinar contra o sarampo	no		1566399717	TV BrasilGov	UCjaWLFTNqLkq3ZY2BJ4NYRg	News & Politics	8185				0	2
3zIZZeuwW6w	Secretaria Estadual de SP vai ampliar imunização contra sarampo	no		1562885042	TV Canção Nova	UCVrKQMmA2ew9LFzeIDaOFgw	Entertainment	9767	127	7	0.05511811023622	0	0
2F_Htynbq60	Equipe de saúde vão às ruas para dar vacina contra o sarampo em SP	no		1567103080	Hoje em Dia	UCN-opsqqDunWO6h5uCp9Y4g	Entertainment	8146	109	10	0.091743119266055	0	15
DPW5Qcch594	Vacina tríplice viral é aplicada em duas doses no Brasil	no		1436974550	TV BrasilGov	UCjaWLFTNqLkq3ZY2BJ4NYRg	News & Politics	5287				0
gxLUMgyWyF0	Como funciona a vacina contra a febre amarela?	no		1516734232	Canal USP	UCN1ihdoKXeixzYi7Hyp4WwQ	Education	7679	258	5	0.01937984496124	0	6
ALulSvxSL3o	Campanha de Vacinação contra o Sarampo - 20 a 29 anos	no		1574086690	Ministério da Saúde	UC12zKGLhMhDeDidoctM6BrA	Nonprofits & Activism	1929773	230	5	0.021739130434783	0	10
w7PI724zOMY	10 MITOS E VERDADES SOBRE AS VACINAS	no		1558450810	Nunca vi 1 cientista	UCdKJlY5eAoSumIlcOcYxIGg	People & Blogs	4236	937	10	0.010672358591249	0	124
sI0_lbQnvBA	Campanha de vacinação contra gripe é prorrogada	no		1529017697	TV Canção Nova	UCVrKQMmA2ew9LFzeIDaOFgw	Entertainment	20668	114	26	0.2280701754386	0	0
uikJnuwnjZ0	Vacinação versus Movimento Anti-Vacina | bloco 1 | Realidade em Pauta	no		1533247203	Revista Novo Tempo	UCcoPc-BqFPkVkkwyS35J-ng	News & Politics	1492				0	0
JGicQ3TO2NQ	Ministério da Saúde inicia Campanha Nacional Contra o Sarampo	no		1570487545	TV Canção Nova	UCVrKQMmA2ew9LFzeIDaOFgw	Entertainment	2297	41	0	0	0	0
57tSQas4ViI	Alemanha quer multar quem não vacinar crianças contra sarampo	no		1557160041	euronews (em português)	UCUmEPYxmnyQDeRUcFkslmQw	News & Politics	16063	57	8	0.14035087719298	0	5
C7oOAbs-K_I	SARAMPO - Conheça a Doença que Ataca as Crianças	no		1531320055	Faz Bem Dicas de Saúde	UCoyhq57ClXRTd4h8vpiMelA	People & Blogs	11068	382	14	0.036649214659686	0	72
yX14Z9Wye1Q	SARAMPO - Como saber se é sarampo?	no		1531758392	Diário Natureba	UCrRLxJiZvwAAWj0bcxdvPAA	Howto & Style	6627	92	4	0.043478260869565	0	1
3-QcTEzounE	Coronavírus: Diplomata descreve operação de resgate de brasileiros da China	no		1581107546	BBC News Brasil	UCthbIFAxbXTTQEC7EcQvP1Q	News & Politics	169164	7688	222	0.028876170655567	0	1527
ZQgR2utCYEU	Os brasileiros que viveram a 2ª guerra mundial em Londres	no		1581252689	BBC News Brasil	UCthbIFAxbXTTQEC7EcQvP1Q	News & Politics	16276	2359	20	0.0084781687155574	0	179
ZrXBZRBJmTc	Amazônia perde ‘um campo de futebol’ de floresta por minuto	no		1562434858	BBC News Brasil	UCthbIFAxbXTTQEC7EcQvP1Q	News & Politics	19631	1510	141	0.093377483443709	0	295
p3sYeQekrlc	Sarampo: doença provoca manchas avermelhadas na pele	no		1349879092	Minha Vida	UCMYTIyqS1-7wT-3pBB8bR5A	Science & Technology	196343	1489	95	0.06380120886501	0	35
ghTSBrGT9a4	Coronavírus: 5 recomendações para se proteger	no		1580728700	BBC News Brasil	UCthbIFAxbXTTQEC7EcQvP1Q	News & Politics	133258	10377	158	0.015225980533873	0	763
dZVPiR8fJB8	VACINA - POLÊMICA DA SEMANA	no		1541253605	Porta dos Fundos	UCEWHPFNilsT0IfQfutVzsag	Entertainment	1591806	120100	4011	0.033397169025812	0	4482
xaQtrd_KKW0	Arminio Fraga: Minhas propostas me colocam à esquerda mas não esquerda que dá dinheiro para rico	no		1580767236	BBC News Brasil	UCthbIFAxbXTTQEC7EcQvP1Q	News & Politics	37858	1981	289	0.14588591620394	0	500
5Y0WEJLljPs	Não compartilhe fake news	no		1538575656	Planalto	UCjjYaSHsZSUNTSwUV8OfOrA	News & Politics	1870149				0	2
B89CHy4Hj6o	Brexit: O que muda no Reino Unido depois da saída da União Europeia	no		1580479002	BBC News Brasil	UCthbIFAxbXTTQEC7EcQvP1Q	News & Politics	193798	17607	290	0.016470721871983	0	1591
cdl4bDYzy6Y	Suspeita de sarampo no centro de SP é motivo de preocupação	no		1544093811	Jovem Pan News	UCP391YRAjSOdM_bwievgaZA	News & Politics	74336	431	57	0.1322505800464	0	34
lo8CyH_pHtw	Acordo Mercosul-União Europeia: o que se sabe	no		1561766603	BBC News Brasil	UCthbIFAxbXTTQEC7EcQvP1Q	News & Politics	59748	6455	109	0.016886134779241	0	832
37Tk7DV-F9E	Calendário de Vacinação 2019 - ATUALIZADO (COMPLETO) por Anii G.	no		1554948803	Anii G.	UCq8ChnGCYMVCzDgGMK9e91A	Science & Technology	20199	964	49	0.050829875518672	0	43
Wgsj0TJGNXw	Reforma da Previdência: um resumo do que aconteceu até agora e os próximos passos	no		1562342682	BBC News Brasil	UCthbIFAxbXTTQEC7EcQvP1Q	News & Politics	167459	5397	255	0.047248471372985	0	628
eZv0e_qSYbk	FAKE NEWS SOBRE VACINA - Ep. 1258	no		1534645253	Cadê a chave?	UCtrjFP7i92_30uv6IehwE5Q	Entertainment	418373	71561	2392	0.033426028143821	0	2303
VM77Y3wVfss	Bolsonaro: Facada Fake? (Linguagem Corporal - Metaforando)	no		1536708896	Metaforando	UCh7TUTXojlE8vRtb-EnuDzw	People & Blogs	1181724	126048	4523	0.035883155623255	0	11474
Ybf72eLgMgc	Doria critica reeleição e diz que há 99% de chance de F1 não sair de São Paulo	no		1562685066	BBC News Brasil	UCthbIFAxbXTTQEC7EcQvP1Q	News & Politics	18163	741	147	0.19838056680162	0	179
vXpCTgNT9Q0	4 coisas bizarras que são permitidas em países	no		1546122602	Fatos Desconhecidos	UCbAiIkPobUFy71zlmwVw3jw	Entertainment	805632	60947	938	0.01539042118562	0	2094
G9XkAf9nGCo	A VIDA DA SUA FAMÍLIA ESTÁ EM RISCO NÃO É CLICKBAIT	no		1530479918	Felipe Neto	UCV306eHqgo0LvBf3Mh36AHg	Entertainment	1544806	209903	3529	0.016812527691362	0	14220
eJYJYBodH6U	Gravidez só um mês após a vacina	no		1517521430	Jornal da Gazeta	UCNl_i-ggJbZNyOLlhE7yyhw	News & Politics	16867	117	5	0.042735042735043	0	9
Vlwu5oNhya4	Surto de Sarampo no Brasil | Atualidades - Brasil Escola	no		1547143203	Brasil Escola	UCsgHWN8lYveMUEWTDheTjZA	Education	3327	199	2	0.010050251256281	0	7
O5TfVU5hEOo	DOCUMENTÁRIO: Mães Sem Nome: O Luto de Mulheres que perderam filhos.	no		1449018266	Bruno Dias Jornalista	UCbeCLZ2E_oD071BkTCw5uRQ	People & Blogs	19292	367	9	0.024523160762943	0	54
ex3POs_aOpQ	Sarampo é transmitido mesmo antes da doença se manifestar alerta diretora de imunização de SP	no		1563970108	Jovem Pan News	UCP391YRAjSOdM_bwievgaZA	News & Politics	3646	94	6	0.063829787234043	0	16
NX5VDzK8N4c	Notícias falsas atrapalham vacinação contra o sarampo	no		1551290306	TV Canção Nova	UCVrKQMmA2ew9LFzeIDaOFgw	Entertainment	3973	126	12	0.095238095238095	0	0
wJiCAxA_OFs	VACINAS QUE A GESTANTE PRECISA TOMAR | Gravidez	no		1552496408	Almanaque dos Pais	UCy7oVBYY0FGXeeJpy6ITXxQ	People & Blogs	19383	1827	22	0.012041598248495	0	159
8qCo7siUcsI	Moro pede licença não remunerada: entenda	no		1562624123	BBC News Brasil	UCthbIFAxbXTTQEC7EcQvP1Q	News & Politics	25294	2144	349	0.16277985074627	0	535
fzilpZotG9w	O garoto ANTI VACINA que SE DEU MAL	no		1561669637	Mundo Bizarro /Jr	UCPQqOZhDKr9AjLfXDOjoaww	Comedy	25992	3763	189	0.050225883603508	0	639
qP5MxqNkLK0	O que aconteceu com a GAROTA mais pesquisada no GOOGLE?	no		1559250803	Mundo Bizarro /Jr	UCPQqOZhDKr9AjLfXDOjoaww	Comedy	868325	22910	512	0.022348319511131	0	1217
QS2WGGgJcqY	ME CASEI E TIVE QUE FAZER ISSO NO MEIO DA RUA!!!	no		1562424840	Juliana Priscila	UCLWAkPY5RjvCuwJu_C3Ok-A	People & Blogs	761382	43608	1034	0.023711245643001	0	783
e_y9SGwaqYo	ENTREVISTA: MÉDICA EXPÕE A VERDADE POR TRÁS DO MAIS MÉDICOS	no		1542380531	Terça Livre TV	UC7qK1TCeLAr8qOeclO-s39g	News & Politics	183710	24594	321	0.013051963893633	0	1249
xYDHcutf2wU	NÃO ACREDITO QUE PASSEI ESSA VERGONHA - Os Meninos viram tudo*	no		1562621817	Juliana Priscila	UCLWAkPY5RjvCuwJu_C3Ok-A	People & Blogs	374308	33136	656	0.01979719942057	0
pCcUsJFEIpk	Quando MENTES para conseguir TRABALHO	no		1562882336	Mundo Bizarro /Jr	UCPQqOZhDKr9AjLfXDOjoaww	Comedy	300409	20623	218	0.010570722009407	0	817
nNljnxfpOBg	O Bolsonaro precisa falar e reagir e o impíchi do ministro.	no		1581129774	Fabio Click Time	UCQz-h9kq50OxKmU2yGoOWlg	News & Politics	7220	1752	50	0.028538812785388	0	112
YPVT4YtduaM	A Maior Dor...	no		1562590805	Mamaefalei	UCkSjy-IOEq-eMtarZl2uH1Q	People & Blogs	362917	53832	751	0.013950809927181	0	2571
FhyyLC7YiZE	Não vacinar os filhos pode causar perda da guarda das crianças	no		1531578344	Fala Brasil	UCwVmZjJwkCUCOes5_eAIebg	News & Politics	3638	69	70	1.0144927536232	0	166
FYWOoaOqA1s	PIRULLA X LAIR - Dia que o Pirula se meteu com o Dr Lair Ribeiro	no		1509101308	U MIÓ QUE TÁ TENO	UC4F32QLrpDmmRrozxr9z59g	Science & Technology	286811	17904	3080	0.17202859696157	0
uHpH5i3QHgI	LULA NÃO ESTÁ PRESO!!!	no		1523318799	Rômulo Maraschin	UCSyUhW3u3JazIT3VtE4nCEw	News & Politics	192365	11675	1530	0.13104925053533	0
KOYLsIYZKrI	BOLSONARO E A REDUÇÃO POPULACIONAL DA AGENDA 2030 EM DAVOS	no		1548348393	Firmeza da Verdade	UCr0NQAx7C64fOrNxVdc8gYA	People & Blogs	432908	16330	3293	0.20165339865279	0
7S_nVuXgl3g	Rubéola: risco que as gestantes não precisam correr	no		1487785820	Ministério da Saúde	UC12zKGLhMhDeDidoctM6BrA	Nonprofits & Activism	15738	177	11	0.062146892655367	0	1
yK0RRQYVFKM	Doenças exantemáticas - Parte 1 (sarampo e rubéola) - Aula SanarFlix	no		1518469888	Medicina Resumida	UCE0KRm8m9_ki8MrMYGyjpAw	Education	23259	609	17	0.027914614121511	0	25
jBZPn4PJhZg	Caxumba provoca inchaço doloroso das glândulas salivares	no		1349879335	Minha Vida	UCMYTIyqS1-7wT-3pBB8bR5A	Science & Technology	367935	1880	117	0.062234042553191	0	195
URv5SUCrAK8	Sarampo e suas complicações	no		1309375160	Wolmar Carregozi	UC45WrWwAypYvlhYbuG9UNqQ	Science & Technology	18179	79	8	0.10126582278481	0	3
S1hQn2D3HLg	Caxumba: conheça os sintomas e formas de tratamento | DTUP	no		1500044045	Rede Super de Televisão	UCFl00VTEDEA0cHCoMQ7CuZg	People & Blogs	28118	401	26	0.064837905236908	0
B0YXZVVspxc	Vacina Tríplice para gestantes entra no calendário do SUS	no		1416858774	tvbrasil	UCSv9d0kQegylHWpP83jWSQg	Entertainment	992	6	1	0.16666666666667	0	0
DMIKW7Ev458	Gestantes devem seguir calendário de vacinas para evitar sequelas de doenças no bebê	no		1533765735	TV BrasilGov	UCjaWLFTNqLkq3ZY2BJ4NYRg	News & Politics	7670				0
Yp0TLn9t97o	Rubéola: ínguas e manchas na pele são características da doença viral	no		1349879173	Minha Vida	UCMYTIyqS1-7wT-3pBB8bR5A	Science & Technology	270085	1033	100	0.096805421103582	0	35
qfdRzSIL7AQ	GESTANTES DEVEM SE VACINAR?	no		1537239802	Beep Saúde	UCzzv3f3UIhYZlIeuOl2QH9Q	Science & Technology	26568	165	47	0.28484848484848	0	6
WFzBEjQtqPU	A falta de ar e as emoções!	no		1368457347	Vida Melhor	UCCD5yY6oDcu-PvLnP4FIJ8A	Entertainment	69970	1383	51	0.036876355748373	0	93
1_NTw6rw0o0	Sarampo	no		1521533464	Direção-Geral da Saúde	UCNmv_2YqryuyhB79ehzOsmQ	Nonprofits & Activism	7286				0
5bnVu4Q2HUc	Sarampo provoca graves consequências à saúde	no		1560447129	Ministério da Saúde	UC12zKGLhMhDeDidoctM6BrA	Nonprofits & Activism	4661	96	1	0.010416666666667	0	2
8_ENxZX8YjE	Ministério da Saúde intensifica vacina contra o Sarampo	no		1562891067	TV BrasilGov	UCjaWLFTNqLkq3ZY2BJ4NYRg	News & Politics	3247				0	0
UmVCbIKMfIw	Saiba mais sobre Asma e Bronquite	no		1374780302	Vida Melhor	UCCD5yY6oDcu-PvLnP4FIJ8A	Entertainment	205111	4286	194	0.045263649090061	0	152
p-kpOiqCrgs	Papo de Mãe # AUTISMO!!! Como é feita a descoberta??? Primeiros passos parte 1.	no		1487271481	Ruth Avelino	UCCWZCP1lQxWvjQUUOWc6dFw	People & Blogs	3366	138	5	0.036231884057971	0	23
1h-GFxiWfs8	As principais doenças autoimunes	no		1329364842	Hospital Israelita Albert Einstein	UCK0SYPK1n9055P-JjLkOZJw	Science & Technology	86569	1111	32	0.028802880288029	0	66
Kt25U-cYXGI	Catapora: seus sintomas causas e prevenção - Vida e Saúde	no		1349209234	Unimed Fortaleza	UCUtDAMp91VCfHTZ9_ypKRPA	People & Blogs	240600	3100	177	0.057096774193548	0	295
ACqRyArFS2k	Mitos e Crenças: A vacinação pode causar autismo nas crianças	no		1305201423	HMSPortugal	UC1VlEIPGhDqaUsL7Vg__hHA	Science & Technology	2260	10	1	0.1	0	3
PPIa3dDxzEE	Autismo Leve	no		1523541671	Mayra Gaiato	UC42k7FI53tnSSIjgzW-rbLA	Education	92988	6249	105	0.016802688430149	0	269
0RC92hLDbEk	Cícero Coimbra fala sobre vitamina D na gestação e zika vírus	no		1486118941	Jolivi Saúde	UCzDQaYfHMJrXfw46whk6hIg	Education	23744	935	12	0.01283422459893	0	57
4-vKMhOABRg	ASMA E BRONQUITE-saiba tudo a respeito e como lidar	no		1312235945	marcoaurelionunes1	UCcSJI9MVSPEhKt5OnOv2Mdw	People & Blogs	132646	921	58	0.062975027144408	0	39
GqGxOTFiwko	Leis e Epilepsia	no		1349289738	Camila Delmondes Dias	UChFmohIxapcro2kigBCT_AQ	Education	62132	1461	57	0.039014373716632	0	200
5AorONFVu4Q	Sorologia IgG e IgM	no		1460796571	Enf. Leandro Bauer	UCKWtY_NSa3xTkz0YT28QNSg	People & Blogs	118954	1997	74	0.037055583375063	0	172
xmIBdl1rpY4	Caxumba: Sintomas Tratamentos e Causas!	no		1546966931	Saúde Dicas - Oficial	UCj0aH1oJz-m3n6TDW-Ly20w	Howto & Style	18366	600	20	0.033333333333333	0	17
gsv9PZ5getI	Marcelito Pomoy Sings Beauty And The Beast With DUAL VOICES! - America s Got Talent: The Champions	no		1581256794	America s Got Talent	UCT2X19JJaJGUN7mrYuImANQ	Entertainment	5116940	159640	3925	0.02458656978201	0	23523
yT8OyuIX56Q	UFC 247: Jon Jones and Dominick Reyes Octagon Interview	no		1581229540	UFC - Ultimate Fighting Championship	UCvgfXK4nTYKudb0rFR6noLA	Sports	1729980	20460	18959	0.92663734115347	0	19112
Z743oNzfIcY	Even Thinner Than AirPods...	no		1581267612	Unbox Therapy	UCsTcErHg8oDvUnTzoqsYeNw	Science & Technology	985111	33170	3144	0.094784443774495	0	2121
M3Y_B7fNmjA	The Most Underrated Game Ever	no		1581275004	Jaiden Animations	UCGwu0nbY2wSkW8N-cghnLpA	Film & Animation	2192359	217247	2284	0.010513378780835	0	31517
wioKuReF1FM	Dominick Reyes reacts to Jon Jones defeat | UFC 247 Post Fight Press Conference	no		1581237116	TheMacLife	UC789h3eqw0H1HqGmIsI26OA	Sports	1286620	19127	1330	0.069535212003973	0	12348
KSKJKLmAqpI	Lamborghini Race Winner Keeps Lamborghini	no		1581195602	MrBeast	UCX6OQ3DkcsbYNE6H8uQQuVA	Entertainment	13733726	743056	12136	0.016332550978661	0	36947
r22-K87tEPk	Rebuilding A Wrecked 2020 Jeep Gladiator Rubicon Part 8	no		1581258602	goonzquad	UCwO_xoYm2vjhu4kZSxFO5mA	Howto & Style	715555	34659	469	0.013531838772036	0	1836
AmKVJ4XSJvw	Fake Cake Vs Custom Cake 2 - Challenge	no		1581256802	Guava Juice	UCMNmwqCtCSpftrbvR3KkHDA	Entertainment	451306	10336	1074	0.10390866873065	0	9378
ihalG3Rw_QA	ADAM SANDLER wins Best Male Lead for UNCUT GEMS at the 35th Film Independent Spirit Awards	no		1581210295	Film Independent	UCZWlScCmjiezyIRAybUgXYQ	Film & Animation	1045163	22227	233	0.010482746209565	0	1265
SYPMnNGa1Mo	We Tested VIRAL TikTok FOOD HACKS... **SHOCKING**	no		1581189469	FaZe Rug	UCilwZiBBfI9X6yiZRzWty8Q	Entertainment	3232315	130206	4772	0.036649616761132	0	12870
vF_bMn-Aj2w	Song Association Game with my Sis #funnyaf	no		1581209160	Bretman Rock	UC3EFKdXAU99j3ppGgvTz7XQ	People & Blogs	2710010	176236	2475	0.014043668716948	0	8628
DAyKeqm2_uc	Como tornar MARTE habitável? Com Iberê	no		1528124401	Canal Nostalgia	UCH2VZQBLFTOp6I_qgnBJCuQ	Entertainment	3745299	468911	5108	0.010893325172581	0	15928
Bl8Q7Lt56y0	A origem do universo | Teoria do BIG BANG	no		1517432401	Canal Nostalgia	UCH2VZQBLFTOp6I_qgnBJCuQ	Entertainment	3873179	562869	7691	0.013663925353857	0	33689
ASUTHfx1Qw0	CAIXA MISTERIOSA DE BATMAN MISSIONS!!	no		1544708701	Brancoala	UC0otZdGYsA9KqVKAcn2peQA	Entertainment	3964241	48499	4447	0.091692612218809	0
WRJB9J4MgxY	30 COISAS QUE VOCÊ NÃO SABIA EM 5 MINUTOS [21]	no		1581258941	Fatos Insanos	UCF5OxapO7zJUkX9EYvGwN_Q	Entertainment	34223	4473	34	0.00760116253074	0	87
CMfjd--AqWY	90% DAS PESSOAS ERRARAM A RESPOSTA	no		1545912001	Felipe Neto	UCV306eHqgo0LvBf3Mh36AHg	Entertainment	7620168	462270	9056	0.019590282735198	0	23998
_SxWAyV5BWY	VÍDEO GAMES FAZEM MAL?	no		1533740404	Canal Nostalgia	UCH2VZQBLFTOp6I_qgnBJCuQ	Entertainment	3190766	346797	3255	0.0093858943416466	0	10045
IWqQeiwMgco	AQUELE VÍDEO DE CIÊNCIA! - PSVVU (Ep. 01)	no		1506472910	Coisa de Nerd	UCuxfOdbKQy0tgGXcm9sjHiw	Entertainment	2355462	313000	1721	0.0054984025559105	0	10986
iACNqqO7fz8	TRUQUES INCRÍVEIS COM BALÕES	no		1546545603	Felipe Neto	UCV306eHqgo0LvBf3Mh36AHg	Entertainment	8428783	567271	10436	0.018396850887847	0	13719
i06-Gp6hU3o	ANIMATOONS #1	no		1449838801	Canal Nostalgia	UCH2VZQBLFTOp6I_qgnBJCuQ	Entertainment	4785342	360283	8618	0.023920085044257	0	10566
E3cIU6NbMWE	Essa é a Primeira Foto de um Buraco Negro	no		1554927469	Ciência Todo Dia	UCn9Erjy00mpnWeLnRqhsA1g	Science & Technology	883346	130360	963	0.0073872353482663	0	6261
yJCFpv7T2Ys	O QUE ACABOU COM OS DINOSSAUROS ??	no		1536178158	Você Sabia?	UCj0O6W8yDuLg3iraAXKgCrQ	Entertainment	7145603	671072	6142	0.0091525201468695	0	25781
Q9J4ArjheD8	O Entrelaçamento Quântico Explicado	no		1545334686	Ciência Todo Dia	UCn9Erjy00mpnWeLnRqhsA1g	Science & Technology	469768	58125	404	0.0069505376344086	0	3131
mJcR7Tw8S9U	ZELDA - Nostalgia	no		1371087734	Canal Nostalgia	UCH2VZQBLFTOp6I_qgnBJCuQ	Entertainment	1513062	99113	954	0.0096253770948312	0	11902
5ht8ewR694M	Descobertas recentes da ciência que você não vai acreditar!!	no		1521060396	Universo Curioso	UCgWOsOjYMJyndvwyU9gzBKQ	Entertainment	530962	18899	554	0.029313720302662	0	464
nEVPDqUb5dM	A TERRA É PLANA? Com Leon e Nilce	no		1510174803	Canal Nostalgia	UCH2VZQBLFTOp6I_qgnBJCuQ	Entertainment	7892018	1146159	25982	0.022668757127065	0	77177
Z6Ne-FCNOY8	Guerra Fria ao som de Eduardo e Mônica - Retrospectiva HISTÓRICA	no		1561647499	Canal Nostalgia	UCH2VZQBLFTOp6I_qgnBJCuQ	Entertainment	2513947	411583	4688	0.011390169176084	0	9651
WvQlhMjGo4M	BURACOS NEGROS como eles surgem?	no		1508360401	Canal Nostalgia	UCH2VZQBLFTOp6I_qgnBJCuQ	Entertainment	4939057	733052	4354	0.0059395513551563	0	19858
0I6ZQOPfgJk	O QUE MATOU OS DINOSSAUROS?	no		1506117600	Canal Nostalgia	UCH2VZQBLFTOp6I_qgnBJCuQ	Entertainment	3969031	531238	5343	0.010057638949021	0	18362
YI0QSpRArWA	Tente Sair do Labirinto em 5 Minutos | VR 360	no		1545345902	INCRÍVEL	UCIQPHl1WKKTt9KkWyo_JNig	People & Blogs	98046	3724	609	0.16353383458647	0	438
OmVca2R32wk	Entenda a corrupção no Brasil de um modo SIMPLES	no		1523052004	Canal Nostalgia	UCH2VZQBLFTOp6I_qgnBJCuQ	Entertainment	2874975	559439	4412	0.0078864719835407	0	15671
oa2nr6XhVQ8	E Se o Sol Fosse um Buraco Negro?	no		1544800113	Ciência Todo Dia	UCn9Erjy00mpnWeLnRqhsA1g	Science & Technology	445286	50577	244	0.0048243272633806	0	1494
Hw68MqQhmTs	15 coisas que você não sabia sobre a COCA-COLA	no		1426084201	Canal Nostalgia	UCH2VZQBLFTOp6I_qgnBJCuQ	Entertainment	3205071	258850	3475	0.013424763376473	0	7188
JGVxXBK8ji0	AS SELFIES MAIS ENGRAÇADAS DO MUNDO	no		1545393615	Felipe Neto	UCV306eHqgo0LvBf3Mh36AHg	Entertainment	4977034	374938	5468	0.014583744512426	0	8346
uKwrpibtKE8	RECEBI O FELIPE CASTANHARI DO CANAL NOSTALGIA EM CASA! | RICHARD RASMUSSEN	no		1514320726	Richard Rasmussen	UC13ikrGSy3E2AveqLAI9lqg	Entertainment	695629	72627	714	0.0098310545664835	0	2762
1Bhb7esrfVE	O dia que um LADRÃO me fez de IDIOTA	no		1542981512	Canal Nostalgia	UCH2VZQBLFTOp6I_qgnBJCuQ	Entertainment	2684941	335324	23035	0.068694754923596	0	7975
soB_zeZhVc0	Um dia em CHERNOBYL - Canal Nostalgia	no		1533222003	Canal Nostalgia	UCH2VZQBLFTOp6I_qgnBJCuQ	Entertainment	9383776	1092393	11649	0.010663744641352	0	22660
DBGwSvj-zZg	CAVALEIROS DO ZODÍACO - Nostalgia	no		1333486102	Canal Nostalgia	UCH2VZQBLFTOp6I_qgnBJCuQ	Entertainment	1988761	111007	763	0.0068734404136676	0	11597
OGSfxOH410I	QUAL A ORIGEM DA LUA?	no		1499983202	Canal Nostalgia	UCH2VZQBLFTOp6I_qgnBJCuQ	Entertainment	4550733	714385	7775	0.01088348719528	0	33857
l52pbGksFp0	A História de como carreguei a TOCHA OLÍMPICA!	no		1468776630	Canal Nostalgia	UCH2VZQBLFTOp6I_qgnBJCuQ	Entertainment	3618625	501787	6173	0.012302032535717	0	14703
P8OUWIfhGTY	TV GLOBINHO - Nostalgia	no		1412197203	Canal Nostalgia	UCH2VZQBLFTOp6I_qgnBJCuQ	Entertainment	2993342	213284	1650	0.0077361639879222	0	22610
622eqAEoJqo	HARRY POTTER - Nostalgia	no		1429799402	Canal Nostalgia	UCH2VZQBLFTOp6I_qgnBJCuQ	Entertainment	4078791	329043	3133	0.0095215518944333	0	14162
ctDMkhL7Xes	Como eu aprendi a ser FELIZ	no		1500674404	Canal Nostalgia	UCH2VZQBLFTOp6I_qgnBJCuQ	Entertainment	1775701	346940	2987	0.0086095578486194	0	12982
ZM-RcouF_lA	NÃO ESPERAVA ISSO NO SETUP DO CASTANHARI	no		1499815926	Rocketz Labz	UCJWCecuSUa9CsNQ4MGJ_g3A	Science & Technology	778597	59859	601	0.010040261280676	0	1560
meLRzQr8e6s	Teorias da Conspiração | Nerdologia	no		1456408801	Nerdologia	UClu474HMt895mVxZdlIHXEA	Science & Technology	793048	87495	1119	0.012789302245843	0	3973
8SSZpwMXxCA	A BÍBLIA DIZ QUE A TERRA É PLANA? (SOBRE O NOSTALGIA CIÊNCIA DO CASTANHARI)	no		1510248147	Dois Dedos de Teologia	UCzGwyAyWLB2Si6VDFpq8rjw	Education	236763	20632	2917	0.14138231872819	0	6732
90N6xRU58Vo	Entenda o sistema político no Brasil de um jeito SIMPLES	no		1495666800	Canal Nostalgia	UCH2VZQBLFTOp6I_qgnBJCuQ	Entertainment	3991030	592942	4275	0.0072098114149445	0	21577
qvZlJOttD4A	COMO FICOU A MINHA CASA? Antes e Depois	no		1506637800	Felipe Castanhari	UCweLVJlESUt6fCdDFeDXgcA	People & Blogs	2637601	243112	3486	0.014339070058245	0	7539
ESyK5tHrBNs	LOONEY TUNES - Nostalgia	no		1447246800	Canal Nostalgia	UCH2VZQBLFTOp6I_qgnBJCuQ	Entertainment	1696873	139671	1098	0.0078613312713448	0	6637
HPVv_oIPW9c	MICHAEL JACKSON - Nostalgia	no		1444251600	Canal Nostalgia	UCH2VZQBLFTOp6I_qgnBJCuQ	Entertainment	7180837	512319	3768	0.0073547926194422	0	36843
fMHDJuXIXWA	MAMONAS ASSASSINAS - Nostalgia	no		1427293801	Canal Nostalgia	UCH2VZQBLFTOp6I_qgnBJCuQ	Entertainment	3318921	291951	1741	0.0059633294628208	0	11282
VPZgbjmPBGc	O FONE DA OSTENTAÇÃO! - Nerd Hi-Tech 10	no		1545435622	Coisa de Nerd	UCuxfOdbKQy0tgGXcm9sjHiw	Science & Technology	1366574	132056	1123	0.00850396801357	0	3393
ugl6UZbGNlw	ANUNNAKI A RAÇA QUE CRIOU OS SERES HUMANOS !!	no		1545334759	Você Sabia?	UCj0O6W8yDuLg3iraAXKgCrQ	Entertainment	4596561	486760	12707	0.026105267482948	0	38060
4EgMUZ6BGuM	Nova Tecnologia que ultrapassa todas as barreiras da Física!!!	no		1511970936	Legião Sobrenatural TM	UCjWw8sBL0PPZLPxusmNLvAQ	Science & Technology	583710	20549	1275	0.062046814930167	0	1030
ZIwMf6mp9YU	FELIPE NETO VAI DESTRUIR SUA FAMÍLIA	no		1542139280	Felipe Neto	UCV306eHqgo0LvBf3Mh36AHg	Entertainment	2315275	301271	14954	0.049636373895928	0	19761
mnfm5_Fizvk	O ENIGMA NEGRO 4 (Enigma Brasileiro)	no		1545573496	Cellbit	UCnU2EtUW8Z4DxSqXxJ5cMQg	Entertainment	1709294	279701	967	0.0034572632918724	0	6890
vSpsk4F3muU	De onde vêm as células (eucariotos) | Nerdologia Ensina 04	no		1563204718	Nerdologia	UClu474HMt895mVxZdlIHXEA	Science & Technology	154714	22324	79	0.0035387923311235	0	580
yOZww0iPQ5w	Quantas Bactérias Moram No Seu Corpo? || 360 VR	no		1537707614	INCRÍVEL	UCIQPHl1WKKTt9KkWyo_JNig	People & Blogs	100071	4620	111	0.024025974025974	0	325
yzHhc6Wnibg	VEM COISA NOVA POR AÍ! CAC- 5 ANOS! - Ep.1304	no		1545435422	Cadê a chave?	UCtrjFP7i92_30uv6IehwE5Q	Entertainment	297165	60863	290	0.0047647996319603	0	2533
AXl-idoM0BA	EU PROVEI QUE A TERRA É PLANA!	no		1523194046	Felipe Neto	UCV306eHqgo0LvBf3Mh36AHg	Entertainment	4779137	480806	27820	0.057861174777353	0
wf4Hkri35DY	Será que devemos entrar em contato com povos isolados? | Minuto da Terra	no		1470144601	Minuto da Terra	UCB0zinWfy-dS_NqcOINYo3A	Science & Technology	180349	10250	109	0.010634146341463	0	270
874tzml-dSw	Viaje pelo Universo Sem Sair do Sofá | 360 VR	no		1532444401	INCRÍVEL	UCIQPHl1WKKTt9KkWyo_JNig	People & Blogs	444889	12435	762	0.061278648974668	0	671
IWHdLLmNHcE	MANSÃO WINCHESTER A CASA MAIS MAL ASSOMBRADA DO MUNDO !!	no		1544731887	Você Sabia?	UCj0O6W8yDuLg3iraAXKgCrQ	Entertainment	6947072	733304	6489	0.0088489903232493	0	22416
aUtyGkG9DSc	TIPOS DE BEBÊS RECEM-NASCIDOS TOMANDO VACINA COM BEBÊ REBORN- GABI REBORN	no		1573253233	gabi reborn	UCk5P5ft8WxlmBrvwmqmYLwQ	Entertainment	167136	8987	343	0.038166240124624	0	291
yTiY-5-4LjY	Como Serão os Humanos e a Terra em 1.000 Anos?	no		1513125047	INCRÍVEL	UCIQPHl1WKKTt9KkWyo_JNig	People & Blogs	539039	25980	1304	0.050192455735181	0	1875
O1KPNcvOHQ4	A Europa RESPONDEU a gente sobre o ARTIGO 13 (inacreditável)	no		1543665606	Felipe Neto	UCV306eHqgo0LvBf3Mh36AHg	Entertainment	3755811	559075	12345	0.022081116129321	0	29922
mtdckZK0Oy8	MELHOR E PIOR DA DC EM 2018	no		1545346252	omeleteve	UCaSAM5kna2KyX-uVLSGr8PQ	Entertainment	282112	23406	939	0.04011791848244	0	1341
Kclft0XTCrI	NATAL - 13 COISAS QUE VOCÊ NÃO SABIA !!	no		1545763124	Você Sabia?	UCj0O6W8yDuLg3iraAXKgCrQ	Entertainment	5318286	698185	7441	0.010657633721721	0	14419
dPY3L1vupzQ	Minecraft - Especial de Natal	no		1545659821	Jovem Nerd	UCmEClzCBDx-vrt0GuSKBd9g	Entertainment	403380	41001	1061	0.02587741762396	0	1296
Xp2wbirNY_M	Viaje Pelo Mundo Sem Sair De Casa | 360 VR	no		1531349999	INCRÍVEL	UCIQPHl1WKKTt9KkWyo_JNig	People & Blogs	393065	16597	473	0.028499126348135	0	950
PW6IteH23cw	KRAKATOA (#Pirula 283)	no		1545757783	Canal do Pirulla	UCdGpd0gNn38UKwoncZd9rmA	Science & Technology	157821	18263	203	0.011115369873515	0	875
DB8yS16aVAs	defendendo a terra plana	no		1521727206	Cellbit	UCnU2EtUW8Z4DxSqXxJ5cMQg	Comedy	2627975	408246	11378	0.027870450659651	0	26265
AmrNqVJuwgY	VACINA PARA GRIPE - Tomar ou não? | Medicina Ortomolecular	no		1543341601	Dr J Bussade	UCOX1xjMcnZVmV-yx0VC6Fvg	People & Blogs	34474	1759	35	0.019897669130188	0	120
fh2Psmv2QYU	QUEM SABE MAIS DE GAME OF THRONES?	no		1545400804	CAROL MOREIRA	UC2oZNzo6o37qejkFQE2dIAA	Entertainment	136896	18358	112	0.0061008824490685	0	585
QykmFQn57Wc	TRETOSPECTIVA 2018	no		1546032182	Zelune	UCTe18hXXnFNL7FDdnVfIqEQ	Entertainment	116134	24080	717	0.029775747508306	0	1656
m8BvYiDeuYY	TOMANDO VACINA COM MEU NAMORADO! *Zabetta Macarini*	no		1562962501	Zabetta Macarini	UCbxeWUKWro8bMscsa36-BtA	Entertainment	359377	21854	360	0.016472956895763	0	639
SGpSyR9eX0Q	ANALISANDO O YOUTUBE REWIND 2018! Por que não tô nele?	no		1544875202	Felipe Neto	UCV306eHqgo0LvBf3Mh36AHg	Entertainment	3272258	364219	32145	0.088257339677502	0	15763
hUpUO78JmlE	RETROSPECTIVA ANIMADA 2018 - Canal Nostalgia	no		1546178406	Canal Nostalgia	UCH2VZQBLFTOp6I_qgnBJCuQ	Entertainment	9165460	978999	105965	0.10823810851696	0	62451
qR7oAkKaAKE	QUEBRANDO TRADIÇÃO NATALINA - Ep.1305	no		1545615175	Cadê a chave?	UCtrjFP7i92_30uv6IehwE5Q	Entertainment	537938	81417	660	0.0081064151221489	0	2371
ZnGDTOPWgXs	[ESPECIAL DE NATAL] AMIGO DA ONÇA COM NOSSA EQUIPE ft DAVY JONES	no		1545769652	Mari e Tha	UCpwFulVhWRsS92nYOTdh-uw	Entertainment	122940	16363	78	0.0047668520442462	0
ncoThYOP6K4	TALK SHOW SHOW - MATHEUS CANELLA	no		1532624693	Magalzão Show	UCgheXPYps0uCdB60AvUQYbg	Comedy	421191	34992	692	0.019775948788294	0	941
98BaO5JYHSg	Felipe Castanhari fala sobre saída do Youtube no Maiara Responde	no		1511164800	Rádio BandNews FM	UCWijW6tW0iI5ghsAbWDFtTg	News & Politics	378117	16721	2526	0.15106751988517	0	501
6jL2Fi-fU1Y	“Tivemos que partir” I 360º	no		1543949060	MSFBrasil	UCyG6SY3s8fS7ZKje6lv1JKg	Nonprofits & Activism	15745	86	3	0.034883720930233	0	2
v1n6vP-XgiQ	A Mata é a Nossa Casa	no		1480937532	Fundação SOS Mata Atlântica	UCwumfjrPgLl0H2wS7juY5Xw	Nonprofits & Activism	1256090	2318	43	0.018550474547023	0	564
kXpdKQ0rF_U	Rolê no Beco Diagonal - O Mundo Mágico de Harry Potter | NerdVlog 360 - Ep.9	no		1464883977	Jovem Nerd	UCmEClzCBDx-vrt0GuSKBd9g	Entertainment	121053	8321	257	0.030885710852061	0	430
NqwO-NmWoZk	CAPSVLOG - Um conceito de Tempo	no		1581285602	Canal CAPSLOCK	UCKXlbJbeAb8uTdRHJhlwE1g	Entertainment	2564	711	3	0.0042194092827004	0	67
LE998KzhuU8	Eu dormi com uma mulher... // Comentando Comentários	no		1545345065	LubaTV	UCYALxwppPJjYyTMEwwEcNCQ	People & Blogs	462332	74305	594	0.0079940784603997	0	3227
AwTDcholkk4	Daily Drive em 360 graus!	no		1501732689	izzynobre	UCT4jm6o-mUMuo1bKHcHSIfA	People & Blogs	11204	983	37	0.03763987792472	0	204
jupz0bdixTk	Autismo do Eric ANTES E DEPOIS - Evolução Pós Terapias e Dicas para o Dia-a-Dia	no		1557522004	Mamãe Tagarela	UCz1xVDltULzUhZCJ1TkvnTQ	People & Blogs	70243	5341	40	0.0074892342258004	0	212
0e0AJCbwGjo	Programa CNH Social divulga lista de candidatos selecionados	no		1581108490	PUC TV GOIÁS	UCBx_CluVFNvy0TXsmNBZ-ow	News & Politics	23	0	0		0	0
_Eu8xqZHD8U	Infectologista fala sobre surto de febre amarela no Brasil	no		1484622367	Record News	UCuiLR4p6wQ3xLEm15pEn1Xw	People & Blogs	25899	293	22	0.075085324232082	0	27
F6wCJxcVchQ	Como Fazer Capa de Caderneta de Vacinação de E.V.A com Fecho 📔💉💕	no		1565960413	Diy com Fabiana Nogueira	UC_vFhB8UkkdeiOOOZTeXG7A	Entertainment	121390				0	224
aVUDDYvbnC0	Coronavírus- Ministro da saúde realiza vistoria na base aérea de Anápolis	no		1581109356	PUC TV GOIÁS	UCBx_CluVFNvy0TXsmNBZ-ow	News & Politics	133	8	0	0	0	0
Sq4PC4okRm4	VACINA TRÍPLICE VIRAL | Calendário de vacinação infantil | Parte 10	no		1532111792	Enfermundo	UC8IbAhPglJ1OeC44A_Gtmqg	Education	14752	493	9	0.018255578093306	0	12
2XsmPu00lMU	Você e o Doutor: conheça os sintomas e saiba prevenir a hepatite A	no		1508860522	Hoje em Dia	UCN-opsqqDunWO6h5uCp9Y4g	Entertainment	38638	745	32	0.042953020134228	0	24
ra_ebPTgzzw	Vacinas e Soros	no		1376920211	SAS Educacao	UCNjPniJ9bZuCDQXCRqNsCBQ	Education	150417	3247	41	0.012627040344934	0	127
K4Px6ng5bMo	Apenas um em cada quatro adultos tomou todas as vacinas afirma pesquisa	no		1531990144	Jornal da Record	UCmpHPgeCBgvk_fDXZQKsnAA	News & Politics	7316	88	4	0.045454545454545	0	6
_RGZSo6lNjg	Administração de Medicação Intramuscular | Sua Saúde na Rede	no		1455717012	Sua Saúde na Rede	UC_er6_R1PKUCxc7QSXxIvzw	Nonprofits & Activism	2403512	12873	2064	0.16033558611046	0
xTmer6vmADw	Saiba como participar de campanha de doação de sangue em Goiânia	no		1581018874	PUC TV GOIÁS	UCBx_CluVFNvy0TXsmNBZ-ow	News & Politics	26	0	0		0	0
5enJZNxVXH8	Campus Pampulha terá postos de vacinação da Tríplice Viral que previne Sarampo Rubéola e Caxumba	no		1567538893	TV UFMG	UCvNbTU5NSQ_K8cWfY9OmWsw	Education	862	24	1	0.041666666666667	0	1
Vyv2CGkIGV8	Conheça os tipos de Hepatites e saiba como preveni-las	no		1364930886	Hospital Samaritano	UCPU9R4M0Fruz-E2Vo9KEmAQ	Science & Technology	5917	60	0	0	0	2
2k_xZMqMD2U	Vacinação tetra-viral	no		1381147846	TV SIM Linhares	UCXLe20604d4XVV_Z6cQc-gg	News & Politics	537	6	0	0	0	0
7OaPU0kt7dE	A melhor forma para o preparo de Injetáveis - FRASCO AMPOLA	no		1504729983	Aplicar Conteúdos em Saúde	UCkke64Kird1ZcZsPJEo_hYg	Education	116034	2173	98	0.045098941555453	0	31
xOgEVpswgEc	Ministério da Saúde reforça recomendação de vacina contra febre amarela e sarampo	no		1550222979	Jovem Pan News	UCP391YRAjSOdM_bwievgaZA	News & Politics	13086	95	7	0.073684210526316	0	10
0nqkxO79nME	Dicas sobre Aplicação de Vacinas: Vias Técnicas	no		1555423833	Aplicar Conteúdos em Saúde	UCkke64Kird1ZcZsPJEo_hYg	Education	17088	739	13	0.017591339648173	0	10
PB-HQWl4Xlw	Doses e Vias de administração das Vacinas - Completo.	no		1555809785	Anii G.	UCq8ChnGCYMVCzDgGMK9e91A	Science & Technology	26824	1626	52	0.031980319803198	0	76
UooU-skPwtc	Veterinária explica sobre as vacinas em cães filhotes	no		1504662472	My Pets Nanny	UCm-XT_NupkfP-19ZE8QJACA	Pets & Animals	146659	3541	169	0.047726630895227	0	289
cp11b-yO51g	01/08/2018 - Imunização: Vacina tríplice Viral e Tetra Viral/Poliomielite	no		1533321716	Tele Educa Mato Grosso	UC9gmqJKNBOyCl2KLdJIv0mQ	Education	1057	17	0	0	0	2
y0JW9YySvW0	VACINAÇÃO EM GATOS. Quais são as vacinas para gatos e quando fazer? - Gatil Hauser	no		1486985401	Gatil Hauser - Gatos persas e exóticos	UCr9Jv4BCx_EZ3-RiuYwQXqg	Pets & Animals	34816	2128	37	0.017387218045113	0	411
vnbHMkDigYU	TODAS AS VACINAS PARA PINTINHOS - Tabela Completa no Vídeo	no		1563548137	Mundo Caipira - Rodrigo Matos	UCLWEHMfQsBVlIEQicwXtb1w	People & Blogs	16611	1294	12	0.009273570324575	0	96
tVvPfJpb2OY	VIRUS MUSICAL 4	no		1564333204	O Que Não Dizer Oficial	UC19aAr6UojQesIVCBsXJGIw	Entertainment	2647929	529897	2105	0.0039724701215519	0	6331
ckZKwTFctS0	Vacina. Como preparar	no		1465186664	Canil Rott Haus	UCvi6qsQ6iqHWDph-ckhX5GQ	People & Blogs	132206	2593	106	0.040879290397223	0	146
Lfq7TzPM0SI	Esses 12 Sintomas de Câncer Muitas Pessoas Desconhecem - Veja!	no		1483650030	Natureba - Curas Naturais	UCN9eb1Z__4hietbXmwxOglw	Howto & Style	2097883	40947	1928	0.047085256551151	0	331
dN5y8NNeM1g	Neurocientistas alertam que uma a cada sessenta e oito crianças tem autismo no Brasil	no		1520826484	Domingo Espetacular	UCP-Vg2PcmLiWpEdvMI1R35w	Entertainment	152151	3485	109	0.031276901004304	0	282
Fl09t_l2F_g	ENTENDENDO O AUTISMO PARA PODER CURÁ-LO	no		1522711209	Dr. Uronal Zancan	UCVqS-HRwe2vq_Jjgu4fg-UA	Education	12165	1084	26	0.023985239852399	0	88
-7yJ7R4gC5M	Autismo explode no mundo. Vitamina D e B9 na gestação. Entrevista Dr. Cícero Coimbra.	no		1521926854	João Carlos Baldan Acupuntura e Saúde Quântica	UCgDb_6JF3elI2CFR9SqSbwA	Science & Technology	22917	1000	18	0.018	0	87
jJM1fAsW3wQ	OS 15 COMPORTAMENTOS COMUNS QUE MAIS FAZEM PERDER SAÚDE	no		1515018438	Dr. Uronal Zancan	UCVqS-HRwe2vq_Jjgu4fg-UA	Education	30416	3289	42	0.012769838856795	0	179
sewuoSutSWY	LACTOBACILOS PROMOVEM O REJUVENESCIMENTO	no		1520291514	Dr. Uronal Zancan	UCVqS-HRwe2vq_Jjgu4fg-UA	Education	32448	2701	32	0.011847463902258	0	190
ggLOnhMSQzg	Por que a prevalência de autismo está aumentando tanto!?	no		1477342125	Mayra Gaiato	UC42k7FI53tnSSIjgzW-rbLA	Education	9063	888	7	0.0078828828828829	0	33
97bfmEDGIck	Conheça a poderosa enzima da saúde produzida pela musculação: a MIOCINA	no		1503966396	Dr. Uronal Zancan	UCVqS-HRwe2vq_Jjgu4fg-UA	Education	127763	11858	147	0.012396694214876	0	668
s9md_TN8UpM	COMO VOCÊ PODE SER IDOSO SEM FICAR VELHO	no		1576024555	Dr. Uronal Zancan	UCVqS-HRwe2vq_Jjgu4fg-UA	Film & Animation	7183	1062	13	0.012241054613936	0	68
PCNES9hnH10	Dr. Uronal Zancan fala sobre carboidratos para o Doce Limão	no		1511527987	Doce Limão	UCfIlLA5vyrS8PgzSOKE2GBw	Howto & Style	44590	3112	33	0.01060411311054	0
t7i5LzSuCCY	COMO FUNCIONA O CÉREBRO DA PESSOA COM AUTISMO?	no		1407164003	Autismo.Apoio. e.Desabafos	UC5eWe0ULMB-T72sAL5ybArg	People & Blogs	384942	7801	112	0.014357133700808	0	190
zbjfmfWXPyo	Autismo	no		1462370086	Minutos Psíquicos	UCFiEI1kDHlO9UQtxx0wj-XA	Education	205243	15696	96	0.0061162079510703	0	538
XfjFOfaaIbE	INTERSTÍCIO É O NOVO ÓRGÃO DESCOBERTO NO NOSSO CORPO	no		1522797672	Dr. Uronal Zancan	UCVqS-HRwe2vq_Jjgu4fg-UA	Education	11867	1386	15	0.010822510822511	0	40
i-Cg3RM737c	SENTIR FOME É UM SINAL DE QUE ESTÁ SE ALIMENTANDO DE FORMA ERRADA.	no		1518560226	Dr. Uronal Zancan	UCVqS-HRwe2vq_Jjgu4fg-UA	Education	40244	3543	48	0.01354784081287	0	199
p7zFpHiWFPA	META-ANÁLISE DEMONSTRA QUE CORRIDA DIMINUI A MORTALIDADE POR TODAS AS CAUSAS	no		1579908522	Dr. Uronal Zancan	UCVqS-HRwe2vq_Jjgu4fg-UA	Film & Animation	9994	1263	10	0.0079176563737134	0	82
rLHv9GuYxdg	O cérebro e o intestino no autismo	no		1528967456	Dra. Andreia Torres	UC81fUuO3oGR-ju7tEAuyNPA	Education	3567	154	3	0.019480519480519	0	2
_LS6UumYLuQ	O QUE SÃO CARBOIDRATOS ÓTIMOS E O QUE SÃO CARBOIDRATOS VENENOS	no		1513377046	Dr. Uronal Zancan	UCVqS-HRwe2vq_Jjgu4fg-UA	Education	553785	29993	853	0.028439969326176	0	1651
8jBE9Jxgr5A	Mente Atenta (Mindfulness) É o Principal Recurso de Saúde e É Superior À Meditação	no		1511649216	Dr. Uronal Zancan	UCVqS-HRwe2vq_Jjgu4fg-UA	Education	33527	2862	36	0.012578616352201	0	116
w43jPm8kyBc	A frutose é a maior inimiga para o fígado	no		1508883877	Dr. Uronal Zancan	UCVqS-HRwe2vq_Jjgu4fg-UA	Education	390376	17173	633	0.036860187503639	0	1114
uaphvcXkTRo	Dr. Barakat : Água com limão/ Arroz e feijão	no		1552332772	doutorbarakat_snapchat	UC33LTYvNoNvpx7D5qezhxew	People & Blogs	79217	5884	85	0.014445955132563	0	253
7_0ZbB38lEI	COMER FIBRAS DEIXA AS PESSOAS MAIS JOVENS	no		1526081950	Dr. Uronal Zancan	UCVqS-HRwe2vq_Jjgu4fg-UA	People & Blogs	12407	1543	12	0.0077770576798445	0	87
lZGBCXLfuj8	A Meditação É um dos Dos Mais Importantes Recursos de Saúde	no		1511562591	Dr. Uronal Zancan	UCVqS-HRwe2vq_Jjgu4fg-UA	Education	27951	2314	28	0.012100259291271	0	96
4IFFhILFsoo	OS 20 PIORES ALIMENTOS QUE VOCÊ NÃO DEVE COMER	no		1513118235	Dr. Uronal Zancan	UCVqS-HRwe2vq_Jjgu4fg-UA	Education	299442	14791	465	0.031438036643905	0	1008
yX0r5PutsWM	As evidências científicas do rejuvenescimento biológico	no		1450892659	Dr. Uronal Zancan	UCVqS-HRwe2vq_Jjgu4fg-UA	People & Blogs	32542	1828	31	0.016958424507659	0	51
FQ3tlqCd-1E	Viva Mais e Melhor Eliminando a Química da Sua Vida	no		1508451566	Dr. Uronal Zancan	UCVqS-HRwe2vq_Jjgu4fg-UA	Education	9599	962	8	0.0083160083160083	0	69
0IM1_1LOc-Q	MENSAGEM DE ANO NOVO	no		1577738415	Dr. Uronal Zancan	UCVqS-HRwe2vq_Jjgu4fg-UA	Education	4849	718	4	0.0055710306406685	0	61
N_9BXMgaK-k	ALZHEIMER VOCÊ PODE TER E NÃO SABER MAS PODE REVERTER E PREVENIR!	no		1522970056	Dr. Uronal Zancan	UCVqS-HRwe2vq_Jjgu4fg-UA	Education	15841	1757	33	0.018782014797951	0	112
91syo1tYzTA	ESTIMULE O SEU IDOSO A CAMINHAR MAIS DEPRESSA PARA VIVER MAIS E MELHOR	no		1521501653	Dr. Uronal Zancan	UCVqS-HRwe2vq_Jjgu4fg-UA	Education	10759	1130	9	0.0079646017699115	0	67
06CV7xd41KA	A Saúde Intestinal É Obrigatória para a Conquista da Saúde Integral	no		1510957525	Dr. Uronal Zancan	UCVqS-HRwe2vq_Jjgu4fg-UA	Education	121610	9074	104	0.011461318051576	0	468
ZJpRdaVLYg8	O QUE COMER PARA NÃO FICAR DOENTE?	no		1540423574	Dr. Uronal Zancan	UCVqS-HRwe2vq_Jjgu4fg-UA	Film & Animation	32507	3818	49	0.012833944473546	0	173
dqQgXgNL2uE	Os Hospitais Matam Mais do Que o Câncer o Trânsito e a Violência Juntos	no		1511475780	Dr. Uronal Zancan	UCVqS-HRwe2vq_Jjgu4fg-UA	Education	11147	1345	15	0.011152416356877	0	134
u3VSi1nwV40	DICAS SOBRE ATRASO NA FALA	no		1500586796	Mayra Gaiato	UC42k7FI53tnSSIjgzW-rbLA	Education	51401	3894	37	0.0095017976373909	0	94
AXOdHF3MBNM	NÍVEIS DE GRAVIDADE E OS PRINCIPAIS SINTOMAS DO AUTISMO - MAYRA RESPONDE	no		1463530188	Mayra Gaiato	UC42k7FI53tnSSIjgzW-rbLA	Education	221520	13012	178	0.013679680295112	0	543
l54SFiFtAoA	Cícero Galli: vitamina D para doenças autoimunes	no		1444243761	NAMU	UCPCwZ6sP0cAwgMsGZ23rOYA	News & Politics	69450	2443	46	0.018829308227589	0	292
rSOduBSz7lI	Como Reconhecer e Identificar Os Primeiros Sinais De Autismo	no		1522708239	Fala Fono por Juliana Trentini	UCgfgPyU5Vc4s1tyBSM6CCvw	People & Blogs	13857	878	19	0.021640091116173	0	156
FWNmgUW8qwA	O VERDADEIRO E ÚNICO DETOX	no		1517265159	Dr. Uronal Zancan	UCVqS-HRwe2vq_Jjgu4fg-UA	Education	400083	25343	634	0.025016769916742	0	1116
k85yIbg7P7M	ADAPTAÇÃO À ALIMENTAÇÃO LOW CARB É MUITO FÁCIL APESAR DE PARECER DIFÍCIL	no		1518646585	Dr. Uronal Zancan	UCVqS-HRwe2vq_Jjgu4fg-UA	Education	65661	5487	68	0.01239292874066	0	443
9JKdOAm0zGc	AULA 4 NO AR - Tudo sobre o Pro Ser!	no		1579003201	Dr. Uronal Zancan	UCVqS-HRwe2vq_Jjgu4fg-UA	Education	2828	285	7	0.024561403508772	0	6
AXe2DcPLxJc	SEJA SEU PRÓPRIO MÉDICO E SEU PRÓPRIO ORTOPEDISTA	no		1537313381	Dr. Uronal Zancan	UCVqS-HRwe2vq_Jjgu4fg-UA	Film & Animation	11517	1538	19	0.012353706111834	0	103
fnDG7UlFVAo	Tira Dúvidas - Como a Indústria Está Te Intoxicando e Mantendo Acima do Peso | Dr Juliano Pimentel	no		1536711774	Dr Juliano Pimentel	UCPGGSQfN8LREy6dWdk85fpw	Education	30692	2718	20	0.0073583517292127	0	350
b3VDB8vgUzc	PROBIÓTICOS SÃO MICRORGANISMOS FUNDAMENTAIS À VIDA.	no		1520119157	Dr. Uronal Zancan	UCVqS-HRwe2vq_Jjgu4fg-UA	Education	26627	2437	29	0.011899876897825	0	164
sByJI8ECUXc	🔴 CARBOIDRATO MATA MAIS QUE GORDURA!!!	no		1534807206	Dr. Uronal Zancan	UCVqS-HRwe2vq_Jjgu4fg-UA	People & Blogs	12794	1613	16	0.0099194048357099	0	120
B6NCz0njk64	VOCE DEVE USAR SUPLEMENTOS?	no		1519082140	Dr. Uronal Zancan	UCVqS-HRwe2vq_Jjgu4fg-UA	Education	25970	2561	24	0.0093713393205779	0	165
lHNgQ-4qjac	AS SETE DIMENSÕES DA SAÚDE	no		1514500146	Dr. Uronal Zancan	UCVqS-HRwe2vq_Jjgu4fg-UA	Education	8647	1017	19	0.018682399213373	0	90
Vxh4Q7BX9yA	Teoria da MENTE e Autismo - Fizemos o teste Sally e Anne (Teste para autismo)	no		1544475603	Mamãe Tagarela	UCz1xVDltULzUhZCJ1TkvnTQ	People & Blogs	79779	4140	98	0.023671497584541	0	204
87r5NBpXduw	STEPHEN HAWKING PROVOU QUE NÃO SE DEVE ACREDITAR NOS PROGNÓSTICOS MÉDICOS	no		1521069354	Dr. Uronal Zancan	UCVqS-HRwe2vq_Jjgu4fg-UA	Education	21908	2201	38	0.017264879600182	0	160
HgQiJQedEHI	Você Sabia que a Falta de Sal Mata Mais que o Excesso?	no		1471452389	Dr. Uronal Zancan	UCVqS-HRwe2vq_Jjgu4fg-UA	People & Blogs	36442	2196	55	0.025045537340619	0	123
qKB3UIlFi08	Inscreva-se na Semana da Longevidade	no		1576523635	Dr. Uronal Zancan	UCVqS-HRwe2vq_Jjgu4fg-UA	Education	209180	315	1	0.0031746031746032	0	10
PGMrSspbgZQ	A IMPORTÂNCIA DE TER NÍVEIS ÓTIMOS DE VITAMINA D	no		1519168691	Dr. Uronal Zancan	UCVqS-HRwe2vq_Jjgu4fg-UA	Education	23912	2307	20	0.0086692674469007	0	134
GMz38OB_Fcg	Sinais de Autismo em Bebês e Crianças pequenas - 1 I Maria Claudia Brito	no		1492115850	Dra Maria Claudia Brito	UCFbx6QBTcDI6toOnO-EyajQ	People & Blogs	296163	4434	324	0.073071718538566	0	174
DPQEj8w5iHM	OS 20 ALIMENTOS MAIS SAUDÁVEIS	no		1513204455	Dr. Uronal Zancan	UCVqS-HRwe2vq_Jjgu4fg-UA	Education	560103	27376	983	0.035907364114553	0	1505
cA1i06qsPe4	O que é ABA? Vídeo Definitivo Sobre a Análise do Comportamento | IEAC	no		1506097223	Instituto de Educação e Análise do Comportamento	UClGVPnkZ62SuUbE4EqTDIYg	Education	40555	1851	104	0.056185845488925	0	54
cx2vMC3wSo4	Autismo- 10 Coisas que todo autista gostaria que você soubesse 2/2	no		1551980951	Diário de um autista	UCbhT_vtlwr7X2wG6q_0mWVQ	Film & Animation	161289	19115	65	0.0034004708344232	0	557
UXHpNl327SI	É MUITO MAIS FÁCIL PERMANECER JOVEM DO QUE REVERTER O ENVELHECIMENTO	no		1575501612	Dr. Uronal Zancan	UCVqS-HRwe2vq_Jjgu4fg-UA	Film & Animation	7522	1057	8	0.0075685903500473	0	91
8Az_U51ckB0	9º DIA DO WORKSHOP - AULA 4- O PRINCÍPIO ÚNICO PARA A CURA DE TODAS AS DOENÇAS	no		1538523317	Dr. Uronal Zancan	UCVqS-HRwe2vq_Jjgu4fg-UA	Film & Animation	3526	421	4	0.0095011876484561	0	22
YnwZviKH3Qs	AULA 3 ESTÁ NO AR	no		1578755398	Dr. Uronal Zancan	UCVqS-HRwe2vq_Jjgu4fg-UA	Education	2804	293	6	0.020477815699659	0	4
MdTXZyWp77k	Como era o Comportamento do meu filho bebê com autismo até os dois anos de idade	no		1528510524	Autista Sem Regras	UCuFi5ZBiy2IgvwVRRhsazQA	People & Blogs	73156	2185	105	0.048054919908467	0	218
mpMBLGRBU2g	Como Ganhar Massa Muscular Com o Cérebro Reptiliano	no		1460456411	Dr. Uronal Zancan	UCVqS-HRwe2vq_Jjgu4fg-UA	People & Blogs	47784	3148	33	0.010482846251588	0	127
GLP_6LHL1dk	AUTISMO LINGUAGEM E FALA I MARIA CLAUDIA BRITO	no		1532037049	Dra Maria Claudia Brito	UCFbx6QBTcDI6toOnO-EyajQ	People & Blogs	13413	1039	8	0.0076997112608277	0	99
xRl35AsbiCo	Autismo dúvidas e mais! | Entrevista com o neuropediatra Dr. Carlos Gadia | IEAC	no		1531090813	Instituto de Educação e Análise do Comportamento	UClGVPnkZ62SuUbE4EqTDIYg	Education	3967	251	7	0.027888446215139	0	13
d6xaX5NJn_I	👼🏻🙏 2 DE ABRIL (DIA MUNDIAL DA CONSCIENTIZAÇÃO DO AUTISMO) - MAIRY RIBEIRO	no		1522635740	Mairy Ribeiro	UCcpEuvf0WL27bLso2tK1DLQ	People & Blogs	9069	252	1	0.003968253968254	0
bgwuT0R_CV4	ASTAXANTINA. O ANTIOXIDANTE MAIS PODEROSO DO MUNDO | Dr. Dayan Siebra | Dr. Dayan Siebra	no		1539270608	Dr. Dayan Siebra	UClN6OLbLp1YjTSwDOkEM2dA	Entertainment	134313	20399	136	0.0066669934800726	0	1068
_lBCN5N2L1g	10 PRODUTOS QUE CAUSAM CÂNCER E ESTÃO NA SUA CASA!	no		1548719591	Dr. Dayan Siebra	UClN6OLbLp1YjTSwDOkEM2dA	Entertainment	970122	86808	1779	0.020493502902958	0	4641
LsSa_PwDVdQ	AUTISMO E ALIMENTAÇÃO - 1	no		1513649714	Dra Tielle Machado	UC4_WOkaSB6TMFad-v0T6qmg	People & Blogs	24850	1453	35	0.024088093599449	0	89
DTJWarlyBVc	Vídeo educativo - Autismo	no		1447027862	Paula Penteado	UC9Xzfea9PyVFl_jmbKVuxAg	People & Blogs	293362	4570	124	0.027133479212254	0	127
yFVaTDfLP8w	[AO VIVO] - Tudo sobre Menopausa com Dra. Denise de Carvalho	no		1522889527	Jolivi Saúde	UCzDQaYfHMJrXfw46whk6hIg	Education	17498	1434	35	0.024407252440725	0	61
SDRVtuZ1JJM	MENOPAUSA e Climatério - O que você PRECISA saber	no		1532880916	Dr. Ícaro Alves	UCewz-5dLWu_rswIMStBBI1Q	Nonprofits & Activism	19688	1228	17	0.013843648208469	0	116
wyu7hmqyrOg	As 7 da Caras - Dr Barakat	no		1537974009	CARAS Brasil	UCAcm_kK9LeKsqntNX_5J9Rg	Entertainment	76120	3629	73	0.020115734362083	0	163
1DOlS0iZez4	Autismo - explicando o autismo?	no		1522841344	Aline Vicente	UCA1nC2t2zfzBOySscmpIzGQ	People & Blogs	21848	2538	20	0.0078802206461781	0	118
f8Vgg1leoMo	7 atitudes que podem te livrar de uma depressão | Dr Dayan Siebra	no		1539131565	Dr. Dayan Siebra	UClN6OLbLp1YjTSwDOkEM2dA	Entertainment	69660	13461	100	0.0074288685833148	0	609
IilBy-Tk79c	E-book - Autismo: A Epidemia Oculta	no		1495053484	Nosso Futuro Roubado	UCZMequcevIbkS-_LLAizS1w	People & Blogs	1071	17	0	0	0	2
3BVfgUNnIIY	Laguna realiza 4ª Caminhada pela Conscientização do Autismo	no		1522698772	UnisulTV	UCoPDcjdXmHCFyW7Pz9DBCOQ	News & Politics	224	7	1	0.14285714285714	0	1
zfzBqjqi9HM	URGENTE!!! Óleo de coco é veneno??? Ivandélio Sanctus	no		1535242433	Ivandélio Sanctus	UCdKg0aioEqn_tbfBGz_ltFw	Entertainment	57828	6463	149	0.02305430914436	0	723
1odBkGD_Uzo	Dr Lair responde vídeo viral do Dr. Fernando Lemos sobre limão faz bem ou faz mal?	no		1547523815	U MIÓ QUE TÁ TENO	UC4F32QLrpDmmRrozxr9z59g	Science & Technology	696996	29750	1816	0.061042016806723	0	8327
lecITZkWqzg	6 Hour Study Music Alpha Waves: Relaxing Studying Music Brain Power Focus Concentration Music ☯161	no		1411136777	Body Mind Zone	UCmQK52xYtdeg7EYiQhqEeZA	Music	5631826	15966	1185	0.074220217963172	0	961
bQvYZ0TkHjk	Setores do cérebro	no		1422374600	Minutos Psíquicos	UCFiEI1kDHlO9UQtxx0wj-XA	Education	251551	15964	97	0.0060761713856176	0	190
WPni755-Krg	Study Music Alpha Waves: Relaxing Studying Music Brain Power Focus Concentration Music ☯161	no		1403779733	Yellow Brick Cinema - Relaxing Music	UCwobzUc3z-0PrFpoRxNszXQ	Music	129481084	615377	35741	0.058079843738066	0	68833
DOZhNkxeRnA	Webaula - Febre Amarela - Janeiro 2018	no		1516375687	Centro de Telessaúde HC-UFMG	UCnyFZr3wJBAJRjcqr_Q5Gug	Education	18086	374	16	0.042780748663102	0	14
Qttzf16dcZw	Estresse	no		1338814789	Canal Saúde Oficial	UC0Q3GfF9amdyyjTA9DpTnyw	Education	6055	68	1	0.014705882352941	0	3
H7-w7kPp63c	Câncer de próstata | Terapias e alimentos que previnem	no		1520465568	Vencer o Câncer	UC8Ciiz3QHgziGJXa4BPY7sQ	Science & Technology	2933	74	4	0.054054054054054	0	1
Eqf8DkykKx4	Lesão cerebral	no		1303933813	Jornalismo TV Cultura	UCXdXYG8dUmEv6jhEji_lSHg	News & Politics	28791	175	12	0.068571428571429	0	2
4aWIIU1rRyU	5 causas que podem levar à perda de memória ( MEMÓRIA)	no		1549015336	Julio Pereira - Neurocirurgião	UCC1_Drela_P4MAW8pPcdjSw	Education	6973	315	10	0.031746031746032	0	14
nMGf81Fa4oU	Autismo e Grandes Cientistas: A História de Henry Cavendish	no		1328007939	Renato Sabbatini	UCSFQIz7KvEWSwuCCh_zh_0Q	Education	91696	1238	47	0.037964458804523	0	108
4AgnT75niNY	Webpalestra - Manejo e tratamento das infecções pelo vírus Influenza	no		1523564514	TelessaudeSC	UCg3fYev0mdtUvJvFJpQUM8g	Education	4826	151	5	0.033112582781457	0	5
x61lq-Ptscg	VISÃO | Doenças neurológicas que afetam a visão	no		1539027058	De bem com a Vida	UCY3bccBm-_J8m0-SQz2AbAg	Entertainment	5482				0
por7LssFrx4	AUTISMO INTERVENÇÃO PRECOCE E NEUROPLASTICIDADE I MARIA CLAUDIA BRITO	no		1492052712	Dra Maria Claudia Brito	UCFbx6QBTcDI6toOnO-EyajQ	People & Blogs	13820	538	19	0.035315985130112	0	12
N1IxCplPan4	Otorrinolaringologia - Sinusite (perguntas)	no		1417609370	10 Minutos de Saúde	UCuSEQ1Ebc3lS5FrwGKpbtkA	People & Blogs	6560	136	8	0.058823529411765	0	6
PZykDQRf2Lg	MANHÃ TOTAL - Reabilitação labiríntica traz exercícios que controlam a tontura	no		1511446018	TV Paranaíba	UCEKBa8byszeoA0f7lt1ledg	News & Politics	18605	365	17	0.046575342465753	0	1
J-1GNl81nKU	Vacinação na Gravidez	no		1524258122	Dra. Graciela Morgado	UCeoHCxOOPTeT9Pp_qi8HmHg	People & Blogs	597	21	0	0	0	1
fQN32qR_M2Y	Mais de 10 anos com o tratamento com vitamina D p/ esclerose múltipla	no		1356111247	Daniel Cunha	UCCUJDced0JrM5EmfdnhuRJw	Nonprofits & Activism	65889	903	21	0.023255813953488	0	115
3N4zpKDTMIU	Ministério da Saúde esclarece boatos sobre microcefalia - Vacinas	no		1449858663	Ministério da Saúde	UC12zKGLhMhDeDidoctM6BrA	Nonprofits & Activism	10875	26	19	0.73076923076923	0	19
Tdjyjp8gP4s	Dicas Para Quem Acabou de Descobrir que Está Grávida	no		1481402795	Dr. Igor Padovesi	UC3O9y5JRSBqn4YhCEvBys_Q	People & Blogs	240034	12135	66	0.0054388133498146	0	491
pm3do0nEuuM	Vírus Zika | Nerdologia	no		1449752401	Nerdologia	UClu474HMt895mVxZdlIHXEA	Science & Technology	626880	73055	212	0.0029019232085415	0	2173
svI9Klh7_Ow	Depois de matéria tendenciosa conheça a verdade sobre a Ozonioterapia.	no		1531871606	João Carlos Baldan	UCeDX3cRwyEND1InTK4Iod2g	Science & Technology	2672	191	6	0.031413612565445	0	32
tTgcOkzWcJg	Material Sensorial(Trabalho desenvolvido com autista)	no		1447047104	Mai Rob	UCeGhoo58OOV262hAkG2eBnQ	People & Blogs	44032	561	20	0.035650623885918	0	25
oq_1yc85u38	Soro e Vacina - Brasil Escola	no		1514311209	Brasil Escola	UCsgHWN8lYveMUEWTDheTjZA	Education	11451	601	7	0.011647254575707	0	20
A_8nZrgcKZM	Inflamação e depressão | Dr Fernando Fernandes	no		1521760122	Psiquiatra Fernando Fernandes	UCemIxU4HzIhVLeohT7eUUoA	Education	4539	637	5	0.0078492935635793	0	35
i1L6JmwJrMQ	A Importância do Fator RH na Gravidez	no		1420829522	Danny Martins	UCNy6EtpfR05_vGNPkb-xQBA	People & Blogs	60423	531	36	0.067796610169492	0	256
5U4fkrUHz1U	Encefalite autistica da vaccino: mamma Margherita al congresso della FIMP di Verona...	no		1365500207	Avv. Saverio Crea	UCl4jPGdW6YDo-1KgU5q8T1g	Nonprofits & Activism	859				0
R6r1YQ-zJdg	16 Formas de Lidar com o Autismo... Aprenda!	no		1311802952	Diego Ferreira	UCo9oJoBqutAtWI5Jb-_EQWQ	Education	58041	381	4	0.010498687664042	0	22
TJEl56FQX2M	As fases da doença de Alzheimer	no		1346373318	EFCAS1000	UCfEQnRUpLwlf85pcXBukT_A	Education	190629	1810	30	0.016574585635359	0	40
ihoSoKv_niY	Água dos Milagres - Testes e comprovações.	no		1438038041	Eduardo Salomão	UC-RhfF4_tepYCgSZuGLSzpw	Entertainment	87125	1707	45	0.026362038664323	0	203
-tyyGDBj4L4	Anemia Falciforme INCT do Sangue	no		1380143792	INCT do Sangue	UCGKQmZBLf_233edf8XzteqQ	Nonprofits & Activism	15872	180	1	0.0055555555555556	0	2
7LP8vmckbYE	Apresentação do MMS - Parte 2	no		1528945178	Andre Chilano	UC-v1PJRoid6DGFzY1jVU3hg	People & Blogs	7504	552	9	0.016304347826087	0	59
PW7xAm1carU	Como as vacinas são produzidas? - Todo Seu (06/04/18)	no		1523305358	Todo Seu	UCW4t6ozY9VDVeN_GHK260BQ	Entertainment	11132	216	17	0.078703703703704	0	14
zMRRAuLF-ts	A importância do Brincar na fase adulta	no		1581354014	Criar e Crescer	UCgbbjw8zPkrmmL_XU1SgJBg	Education	432	52	2	0.038461538461538	0	1
0Zfgr90jn5k	Desenvolvimento e Produção de Vacinas	no		1519314636	Instituto Butantan	UC5Bh3Ljo71O9uML6paQVAfQ	Science & Technology	4061	93	5	0.053763440860215	0	7
nz3P1HPMDfU	Parto Normal é um fenômeno biológico	no		1577887207	Criar e Crescer	UCgbbjw8zPkrmmL_XU1SgJBg	Education	1481	163	3	0.01840490797546	0	7
yAjdC3X4ryw	A importância da rotina na vida da criança	no		1538748009	Criar e Crescer	UCgbbjw8zPkrmmL_XU1SgJBg	Education	7418	465	10	0.021505376344086	0	14
PrWdhQPJ72Q	Parto Humanizado na Atualidade	no		1576519203	Criar e Crescer	UCgbbjw8zPkrmmL_XU1SgJBg	Education	1076	135	1	0.0074074074074074	0	12
ex1UK1nShFI	Vamos falar sobre febre amarela com dr. Esper Kallás | Ao Vivão #05	no		1516280404	Drauzio Varella	UC9zqTTVeClpqMQ5CLuJdWtw	Science & Technology	101499	5403	158	0.029243013140848	0	451
rZSacLHk97w	Autismo: Epidemia ou maior evidência?	no		1577282411	Criar e Crescer	UCgbbjw8zPkrmmL_XU1SgJBg	Education	1982	185	4	0.021621621621622	0	5
fuNyY5mxG7E	Educação X Punição: Qual a melhor alternativa?	no		1545246847	Criar e Crescer	UCgbbjw8zPkrmmL_XU1SgJBg	Education	6001	616	5	0.0081168831168831	0	54
VxcX6S8mwhQ	Primeiros dias do bebê: vacinas e outras dúvidas - Criar e Crescer	no		1462973401	Criar e Crescer	UCgbbjw8zPkrmmL_XU1SgJBg	Education	37983	1920	22	0.011458333333333	0	41
rTkYrvR3mRY	Diagnóstico Precoce: Normalidade X Patologia	no		1575048600	Criar e Crescer	UCgbbjw8zPkrmmL_XU1SgJBg	Education	1426	169	3	0.017751479289941	0	6
J9Kzgy_bRWw	Aproveite o verão com cuidados!	no		1577109604	Criar e Crescer	UCgbbjw8zPkrmmL_XU1SgJBg	Education	1090	158	3	0.018987341772152	0	2
a_cUVuQvd6M	Meu filho me desafia! | Especial Daniel Becker e Isa Minatel	no		1544026464	Criar e Crescer	UCgbbjw8zPkrmmL_XU1SgJBg	Education	14987	1557	18	0.011560693641618	0	103
VS8UBjkVLYU	Porquê a Vacina da Gripe parece NÃO FUNCIONAR - Dr Lucas Fustinoni - Médico - CRMPR 30155	no		1521370433	Dr Lucas Fustinoni	UCjVPaRkoIgq_Whb1QkJjGKg	People & Blogs	9134	1068	20	0.0187265917603	0	60
vR27Qv-x1vI	O que é medicalização?	no		1576074608	Criar e Crescer	UCgbbjw8zPkrmmL_XU1SgJBg	Education	1516	145	1	0.0068965517241379	0	6
AcSNG5n4jJ0	Produtos Químicos: os vilões no dia a dia das crianças	no		1575471604	Criar e Crescer	UCgbbjw8zPkrmmL_XU1SgJBg	Education	1938	325	2	0.0061538461538462	0	10
O-7UI4FQTf4	Como envelhecer	no		1535575432	Metrus Instituto de Seguridade Social	UC3UMFl4FxufRp6YErllpxHQ	News & Politics	67024	4198	107	0.025488327775131	0	87
snDZAUH-Ec4	Cálculo de Benzetacil (Penicilina G) | Explicação + Exercício	no		1519141839	Enfermundo	UC8IbAhPglJ1OeC44A_Gtmqg	Education	18186	661	22	0.033282904689864	0	24
NzlntFS0Gn8	Autismo: 8 Passos Para Ensinar a Falar - como fazemos	no		1539093497	Mayra Gaiato	UC42k7FI53tnSSIjgzW-rbLA	Education	59243	4143	28	0.0067583876418055	0	151
NoT2o9KURCM	Dengue - Receita Poderosa 100% Natural!	no		1526252293	Professor Fernando Braga	UCZ4wREznHPRuUz-ghmp7KGw	Education	33429	2277	58	0.025472112428634	0	154
YgfvZANuKHY	AUTISMO NO JAPÃO! ENTREVISTA COM VALERIA AOYAMA	no		1521453634	seligajapa	UCsCeWWW8sk8zDaPzw6Ll67g	People & Blogs	3059	152	7	0.046052631578947	0	29
HTmx7rdWprM	Esclarecimento	no		1555172958	Jaime Bruning	UCz84Tivi_d214XXnxGbtKHQ	Science & Technology	19402	2563	14	0.0054623488099883	0	206
raAoO9pvGMA	O PODER do Mírtilo e do açafrão na luta contra o câncer Liberado a palavra do Dr Lair	no		1548969363	U MIÓ QUE TÁ TENO	UC4F32QLrpDmmRrozxr9z59g	Pets & Animals	190800	13587	187	0.013763155957901	0	623
syA6bkZMd6s	A verdade sobre a febre amarela e a vacina - Dr Lair Ribeiro	no		1517357720	O NATURAL É MELHOR	UCwQhAc44SfDvhdCQiHluBVQ	People & Blogs	209409	7753	343	0.044240938991358	0	367
TxDo41hsPac	CÂNCER: Uma aula que vai entrar para a história - Dr. Lair Ribeiro	no		1551315835	O NATURAL É MELHOR	UCwQhAc44SfDvhdCQiHluBVQ	People & Blogs	244977	19297	342	0.017722962118464	0	717
blaT-SSn7G4	Leite devo ou não tomar? Verdades definitivas.	no		1555424265	Dr. Fernando Lemos	UChXNyp6dL_aY_3qwVgDd-EQ	People & Blogs	377237	55264	2207	0.03993558193399	0	1907
EIrTJBqmlY8	037 - O que penso do Olavo de Carvalho | Verdade dura e crua!	no		1509218812	Ciencia de Verdade	UCDoPuIvx88nh69fS5VJCNWg	People & Blogs	74677	11897	668	0.056148608892998	0	905
2RL6WbfzeJk	REVOLTA DA VACINA (em 5 minutos!) - Débora Aladim	no		1473804001	Débora Aladim	UCx7HKmnCIIbRBF2FjAoV0bg	Education	512047	51051	239	0.004681592916887	0	713
CC7DcBuIlqQ	Como Saber Se Uma Pessoa É AUTISTA Só de Olhar Para Ela?	no		1506517483	Mamãe Tagarela	UCz1xVDltULzUhZCJ1TkvnTQ	People & Blogs	340354	15339	357	0.023274007432036	0	604
4CN_by9fiEE	O que é o treino Dikul e por que ele pode mudar sua vida	no		1525507164	INCRÍVEL	UCIQPHl1WKKTt9KkWyo_JNig	People & Blogs	833262	42251	716	0.01694634446522	0	361
x367OUC7zw8	LIDANDO COM A ANSIEDADE - MONJA COEN	no		1509212166	O Lado Bom do Mundo	UCnNvQI_yyWPZGI-rqFhR17Q	People & Blogs	180366	12100	118	0.0097520661157025	0	158
hSx5mqUyZuU	Cientistas Provam que Existem 13 Sinais de Inteligência Excepcional	no		1513038764	INCRÍVEL	UCIQPHl1WKKTt9KkWyo_JNig	People & Blogs	822548	37284	1440	0.038622465400708	0	1709
DEEAP0gK5zs	10 Truques de Um Ex Agente do FBI Para Se Tornar 200% Atraente	no		1522234988	INCRÍVEL	UCIQPHl1WKKTt9KkWyo_JNig	People & Blogs	1059887	42351	1205	0.02845269297065	0	917
3sfOCYI3x2E	Sinais de AUTISMO EM BEBÊS (até 2 anos): quais são e como reconhecer.	no		1527087601	Mamãe Tagarela	UCz1xVDltULzUhZCJ1TkvnTQ	People & Blogs	2009963	46721	2824	0.060443911731341	0	1552
zZDkk31QHHg	Tomei vacina 💉 e chorei 😂😂	no		1487812575	Eu você e nós	UC6nYtmaMh43WUQW5YeopuNg	People & Blogs	634747	25351	1299	0.051240582225553	0
EJANb5-04FE	NÓS MERECEMOS FINAIS FELIZES	no		1532428407	O Lado Bom do Mundo	UCnNvQI_yyWPZGI-rqFhR17Q	People & Blogs	353	78	0	0	0	11
DVsT5gdsiuk	OS 6 SUPLEMENTOS MAIS IMPORTANTES NO AUTISMO	no		1522967400	Dra Tielle Machado	UC4_WOkaSB6TMFad-v0T6qmg	People & Blogs	29912	2156	50	0.023191094619666	0	74
UPJALFVuNXI	Limpando o bebê	no		1441205799	Juliana Inventa Moda	UCQq1CfzTvBRn3l4CYswnMcw	People & Blogs	105996	766	158	0.20626631853786	0
gYv-BMHlstU	Antes de Começar a Tomar Vitaminas Veja Isto Para Evitar Problemas	no		1519336189	INCRÍVEL	UCIQPHl1WKKTt9KkWyo_JNig	People & Blogs	611125	49373	723	0.014643631134426	0	693
Ohug1xSNm_o	TOMANDO VACINA - TREMI E MORRI DE MEDO SIM!	no		1504544994	Sweet Carol	UCTFCMkTZPwi_PjerXYxDscA	Entertainment	310138	9468	420	0.044359949302915	0	699
YsippXD47Vc	5 Fatos sobre Medicações psiquiátricas | Psiquiatra Fernando Fernandes	no		1470162826	Psiquiatra Fernando Fernandes	UCemIxU4HzIhVLeohT7eUUoA	Education	48756	2999	96	0.032010670223408	0	258
6tdYlyQO5bU	IDEOLOGIA DE GÊNERO: A VERDADE	no		1530381080	O Lado Bom do Mundo	UCnNvQI_yyWPZGI-rqFhR17Q	People & Blogs	535	109	5	0.045871559633028	0	13
mHjlCK5Casw	NOTÍCIA PRA CARAMBA	no		1507723251	O Lado Bom do Mundo	UCnNvQI_yyWPZGI-rqFhR17Q	People & Blogs	1484	122	2	0.016393442622951	0	18
hmIACmtr2oU	Frases para não falar para autistas e pais de autistas	no		1501689761	Andréia Camargo	UCjrmFzNfoXO-We5rT6jB4vg	People & Blogs	114438	8273	151	0.018252145533664	0	447
bjdOErjaUeY	Teste de QI de 5 Perguntas que Vai Detectar o Seu Intelecto	no		1518308648	INCRÍVEL	UCIQPHl1WKKTt9KkWyo_JNig	People & Blogs	454634	21739	2300	0.10580063480381	0	2030
idvuoZWuiE4	PORQUE PESSOAS INTELIGENTES TEM POUCOS AMIGOS? PSICOLOGIA	no		1522241924	Jane-Six Psicologia Social	UCXTI4ER3d0UPT4WxFYI082w	People & Blogs	405063	31225	697	0.022321857485989	0	4367
Hn6WrqtwC8g	Autismo - Depoimento e Dicas Práticas	no		1522698910	Débora Moreira	UCT3P3oWIt21UsHi_wwDG8Yg	People & Blogs	51827	4111	43	0.010459742155193	0	411
S8DJkSy0bho	O mundo na visão de um Autista	no		1491160263	Nei Rodrigues	UCJS-Vcf3aR_vEX5F7oPIqnA	Entertainment	1481238	43911	847	0.019289016419576	0	2720
QN5yJ4y_c74	O MONSTRO DAS CORES - histórias sobre sentimentos | Fafá Conta	no		1566511203	Fafá conta histórias	UC9fxSdFjcz5QWDEhYCk_k1w	Entertainment	15274	818	16	0.019559902200489	0	78
592PvSW279A	A BRUXA DO BATOM BORRADO - história infantil por Fafá conta	no		1503138601	Fafá conta histórias	UC9fxSdFjcz5QWDEhYCk_k1w	Entertainment	70941	2587	68	0.026285272516428	0	76
zdDWDI88mGo	E O DENTE AINDA DOÍA - história infantil contada por Fafá conta	no		1510954203	Fafá conta histórias	UC9fxSdFjcz5QWDEhYCk_k1w	Entertainment	43265	1583	47	0.029690461149716	0	66
AjAsAVkF01M	Número elevado de casos de sarampo | Dr. Salim	no		1522098936	Jovem Pan News	UCP391YRAjSOdM_bwievgaZA	News & Politics	750	29	2	0.068965517241379	0	3
uwwnFQPeABg	MARCELO MARMELO MARTELO - história infantil contada por Fafá conta	no		1499509802	Fafá conta histórias	UC9fxSdFjcz5QWDEhYCk_k1w	Entertainment	123266	5501	126	0.022904926377022	0	122
H8wytK9jj_4	AS CERTEZAS DE JOANA - história contada | Fafá Conta	no		1567720800	Fafá conta histórias	UC9fxSdFjcz5QWDEhYCk_k1w	Entertainment	4519	379	4	0.010554089709763	0	20
a-NJ-xCyQsU	UMA LAGARTA MUITO COMILONA - contação de história por Fafá conta.	no		1475056800	Fafá conta histórias	UC9fxSdFjcz5QWDEhYCk_k1w	Entertainment	72761	1875	58	0.030933333333333	0	77
WYbZ-UFEvHo	O PINTINHO RUIVO DE RAIVA história infantil contada | Fafá Conta	no		1532037586	Fafá conta histórias	UC9fxSdFjcz5QWDEhYCk_k1w	Entertainment	9381	418	16	0.038277511961722	0	23
u5rfSoNSL30	SÓ UM MINUTINHO - história contada | Fafá Conta	no		1541109604	Fafá conta histórias	UC9fxSdFjcz5QWDEhYCk_k1w	Entertainment	11050	418	10	0.023923444976077	0	34
UCvfOd6DlDA	A CONTAGEM DOS SACIS - história infantil pro Dia do Saci | Fafá Conta	no		1540504803	Fafá conta histórias	UC9fxSdFjcz5QWDEhYCk_k1w	Entertainment	6664	223	7	0.031390134529148	0	9
eL5v3Lp9lsE	Fátima e o fogo mágico - Fafá conta histórias pra APACN #salvasonhos 01	no		1533647700	Fafá conta histórias	UC9fxSdFjcz5QWDEhYCk_k1w	Entertainment	5128	243	8	0.032921810699588	0	11
f61tsJRYjfU	O GRÚFALO história infantil contada | Fafá Conta	no		1532642406	Fafá conta histórias	UC9fxSdFjcz5QWDEhYCk_k1w	Entertainment	38894	1443	32	0.022176022176022	0	44
dF5XBTawwIo	Doença e vacina | Cocoricó	no		1525203001	Cocoricó	UCA6Roeo-qFVk3jvjAdag7Uw	Entertainment	198003	795	168	0.21132075471698	0	43
QJvUeDPwRP8	Como lidar com a fase de bater e morder do seu filho? | Momento Papo de Mãe	no		1507197603	Papo de Mãe TV Cultura	UCQdOZmbeT9UoQy8G3zeNE-g	Entertainment	62223	1547	73	0.047188106011635	0
8BZ8pvWMiV0	A ANTA E O PLOFT - história contada para crianças e adultos | Fafá Conta	no		1553205602	Fafá conta histórias	UC9fxSdFjcz5QWDEhYCk_k1w	Entertainment	8426	314	7	0.022292993630573	0	20
a3ZlKyKfGLs	RECEITA PARA FAZER UM PRÍNCIPE | Fafá Conta	no		1581028203	Fafá conta histórias	UC9fxSdFjcz5QWDEhYCk_k1w	Entertainment	862	91	4	0.043956043956044	0	7
ABJVwcYcvW0	OS LOBOS DE TODAS AS CORES - contação de histórias por Fafá conta	no		1496485800	Fafá conta histórias	UC9fxSdFjcz5QWDEhYCk_k1w	Entertainment	28605	889	27	0.03037120359955	0	41
Z0EO2Ec-Ym0	O ALVO história pro dia dos professores	no		1570140013	Fafá conta histórias	UC9fxSdFjcz5QWDEhYCk_k1w	Entertainment	3817	329	2	0.0060790273556231	0	18
T00Oce1SSdc	DANDARA DOS PALMARES - contação de história | Fafá Conta e Cássia Damasceno	no		1542315602	Fafá conta histórias	UC9fxSdFjcz5QWDEhYCk_k1w	Entertainment	11729	832	7	0.0084134615384615	0	29
EhpjwaXnmv4	Quais Vacinas a Gestante Deve Tomar?	no		1480108738	Dr. Igor Padovesi	UC3O9y5JRSBqn4YhCEvBys_Q	People & Blogs	111962	7329	79	0.010779096738982	0	235
1x394CAgglw	AOS OLHOS DO MAR história contada | Fafá Conta	no		1558648800	Fafá conta histórias	UC9fxSdFjcz5QWDEhYCk_k1w	Entertainment	3718	277	11	0.03971119133574	0	14
1vED5Ok0ots	O VAQUEIRO QUE NUNCA MENTIA conto da tradição oral | Fafá Conta	no		1553810402	Fafá conta histórias	UC9fxSdFjcz5QWDEhYCk_k1w	Entertainment	4506	247	0	0	0	17
uqgaHqmxwNY	O LENHADOR E O MACHADO fábula de Esopo | Fafá Conta	no		1563487207	Fafá conta histórias	UC9fxSdFjcz5QWDEhYCk_k1w	Entertainment	3062	246	3	0.01219512195122	0	7
qGbvQQWbVMo	YAKUBA - história sobre coragem e compaixão | Fafá Conta	no		1565301606	Fafá conta histórias	UC9fxSdFjcz5QWDEhYCk_k1w	Entertainment	5016	267	4	0.01498127340824	0	17
mJJQn6TS6U8	COMO O GRINCH ROUBOU O NATAL - História de Natal Infantil - Fafá Conta	no		1544130003	Fafá conta histórias	UC9fxSdFjcz5QWDEhYCk_k1w	Entertainment	8853	324	6	0.018518518518519	0	18
Z186fLyY4B8	MORANGO SARDENTO - Fafá Conta e Carol Levy juntas contando história pro dia das crianças!	no		1539295202	Fafá conta histórias	UC9fxSdFjcz5QWDEhYCk_k1w	Entertainment	6608	287	4	0.013937282229965	0	26
N1sEHXIoC9M	Protestos Contra Campanhas de Vacinação	no		1497045602	Aulalivre - Enem 2020 e vestibulares	UC4zG6UeNUn-HM6UEFFkiESA	Education	5867	317	18	0.056782334384858	0	44
5wseA00941w	VACINAS ATRASADAS NINA E MANUH - Tiago e Gabi 882	no		1534896650	Tiago e Gabi	UCPaL0Om2geEJyjncqTGm49A	People & Blogs	46209	7074	64	0.0090472151540854	0	469
X1gBFYCBdJk	Vacinar ou Não contra HPV? | Dr. Dayan Siebra	no		1515073811	Dr. Dayan Siebra	UClN6OLbLp1YjTSwDOkEM2dA	Entertainment	42208	4918	60	0.012200081333876	0	315
ekI-ODhAZPI	«Sou francamente a favor da vacinação das crianças contra o sarampo» - Você na TV	no		1521478804	TVI	UC5lg8zKcnJ1rnxR6lPgD1ug	Entertainment	675	6	2	0.33333333333333	0	1
7QNHecXOEOw	VACINA ATRASADA - como colocar em dia?	no		1470255803	WELIDA DANCINI	UCORRcj9wv5DEYCEg2LhBcLQ	People & Blogs	15999	242	19	0.078512396694215	0	21
Y4K2_bY6hdQ	SIGNOS FAZENDO PROMESSAS PARA 2018 - Inferno Astral | signo	no		1513688405	Inferno Astral	UCtzbjh-OJFkaHqSjvWJs87g	Entertainment	410936	37602	560	0.014892824849742	0	2188
Fw7MCcFiox8	Crianças e adultos devem se vacinar contra o Sarampo	no		1531176391	Jornal da Alterosa	UCxbqmMsXory_zC-kNqKHUgw	News & Politics	3758	34	6	0.17647058823529	0	2
0QfL_ofRn9g	Mitos e Verdades - Ovo	no		1467230972	Domingo Espetacular	UCP-Vg2PcmLiWpEdvMI1R35w	Entertainment	666753	7861	640	0.081414578297926	0	169
bv4if4Gkzbo	Mitos e Verdades - Laranja	no		1467153732	Domingo Espetacular	UCP-Vg2PcmLiWpEdvMI1R35w	Entertainment	196403	2369	202	0.085268045588856	0	38
9HxOuSDVvD0	Sobrevivência:10 Itens que você precisa ter!	no		1475326800	Celso Cavallini	UCl1eRuftjRdetdWkrbeDBGg	Education	665675	34491	447	0.012959902583283	0	1706
e1a411Vb7w4	Corrida com Obstáculos - Treme Terra Race!	no		1505821529	Celso Cavallini	UCl1eRuftjRdetdWkrbeDBGg	Education	215644	9467	131	0.013837540931657	0	200
R2DvTnr1u58	20 Dicas pra Alagamentos e Enchentes que Podem Salvar Sua Vida!	no		1581352686	Celso Cavallini	UCl1eRuftjRdetdWkrbeDBGg	Education	3970	802	12	0.014962593516209	0	48
wPeQwmacTxk	Imunologia – Vacinas (Aula 02) com Prof. Marcus Vinícius Paiva	no		1438607954	CEAR UEG	UCoC9FjH7GgWoPIYfr8sEJdQ	Education	41795	392	107	0.27295918367347	0	21
3_Q8i62nVvQ	Vacina contra a febre amarela em viagem internacional	no		1517351196	Jornal da Gazeta	UCNl_i-ggJbZNyOLlhE7yyhw	News & Politics	6871	94	1	0.01063829787234	0	4
gY35kZpsRjw	Os diferentes tipos de vacinas	no		1512489854	Assistência Farmacêutica Avançada	UClbjlUoxxs-Lc7V7tNVa8CQ	People & Blogs	8956	214	8	0.037383177570093	0	2
67A4yp96VnM	Como preparar Algodão com Vaselina Corretamente para Isca de Fogo #sobrevivência	no		1573254000	Celso Cavallini	UCl1eRuftjRdetdWkrbeDBGg	Education	24033	3569	25	0.0070047632390025	0	88
Ti86JNzzGG4	Pra que Serve essa Parte das Multitools e Canivetes #EDC #CROSSTER	no		1575037685	Celso Cavallini	UCl1eRuftjRdetdWkrbeDBGg	Education	22074	2921	47	0.016090380006847	0	66
w5t1L4uxO5g	Como Pedir Socorro na Natureza #SOS	no		1573819217	Celso Cavallini	UCl1eRuftjRdetdWkrbeDBGg	Education	23663	3618	14	0.003869541182974	0	92
iL-0jcd2-3M	Tudo sobre Binóculos - Gravado no Yellowstone #Crosster	no		1581118200	Celso Cavallini	UCl1eRuftjRdetdWkrbeDBGg	Education	16593	2456	19	0.0077361563517915	0	66
EEVutjlTR_Q	Como Organizar seus Equipamentos no Acampamento	no		1579302004	Celso Cavallini	UCl1eRuftjRdetdWkrbeDBGg	Education	25466	3766	38	0.010090281465746	0	83
t6o4QqvP5TM	Imunização para Concursos de Enfermagem - Prof. Dayse Amarílio	no		1440529661	EnfConcursos - Enfermagem para Concursos	UChHd-MU2mOvZHmBQz6zJw_w	Education	293096	4548	250	0.054969217238347	0	79
3LiuWWWIUp0	Como Usar Serra de Poda em Sobrevivência e Bushcraft - Dicas Rápidas #acampamento	no		1574463600	Celso Cavallini	UCl1eRuftjRdetdWkrbeDBGg	Education	16281	2439	42	0.017220172201722	0	29
BoHVWw3NZAM	Tétano: causas sintomas e prevenção	no		1561660791	Ministério da Saúde	UC12zKGLhMhDeDidoctM6BrA	Nonprofits & Activism	20081	413	10	0.024213075060533	0	55
iCYxb0IVxd0	É importante tomar a vacina da hepatite?	no		1563317576	Catraca Livre	UCv2svvDbMNunUuPs8hUUKVA	News & Politics	1271	103	3	0.029126213592233	0	3
zDS0t5riLnA	Estudo comprova eficácia da vacina contra o HPV	no		1562021536	Band Jornalismo	UCoa-D_VfMkFrCYodrOC9-mA	News & Politics	1298	23	4	0.17391304347826	0	1
EwtBkDtCURQ	TUDO QUE VOCÊ SEMPRE QUIS (E PRECISOU) SABER SOBRE VACINAS | MACETES DE MÃE	no		1560175200	Macetes de Mãe	UCTrx5uG9vJjTLloAH8hE-pg	People & Blogs	26743	2171	28	0.01289728235836	0	211
tMgs-BPcswk	Febre Amarela: que países exigem a vacina? DICAS DE VIAGEM	no		1494975602	Viajante Independente	UC2visps0yULA5lnn5Yjne9w	Travel & Events	15710	740	11	0.014864864864865	0	97
BB7BOz-exOQ	Papo Saúde - Calendário de vacinação: adolescentes e adultos	no		1545170273	TelessaudeSC	UCg3fYev0mdtUvJvFJpQUM8g	Education	4352	114	5	0.043859649122807	0	2
DAEEygJatNA	5 mitos ou verdades sobre vacina - #V ou F	no		1441136292	Superinteressante	UCVVIVc6DfU8uWJ60vk8iKpQ	People & Blogs	2353	101	2	0.01980198019802	0	2
7P7-bnd3HpY	Vacinas: Ameaças e verdades por trás dos mitos | Carla Domingues - USP Talks #22	no		1535981841	USP Talks	UCw8ZXVXrAyNTdvzKH6HMhmg	People & Blogs	991	50	4	0.08	0
uACT140Ch2s	Papo Saúde - Calendário de vacinação: até 1 ano de idade	no		1543950941	TelessaudeSC	UCg3fYev0mdtUvJvFJpQUM8g	Education	7872	236	8	0.033898305084746	0	1
8OAUFLEeDAI	WebPalestra: 21ª Campanha nacional de vacinação contra a influenza	no		1554759262	Telessaúde ES	UChFIPDFYjTFg03eWlwmQcTA	Education	1341	60	4	0.066666666666667	0	2
qkSL79ZSJxo	Adultos também devem estar atentos ao reforço das vacinas	no		1498041103	TV Canção Nova	UCVrKQMmA2ew9LFzeIDaOFgw	Entertainment	473	8	2	0.25	0	0
jPQSJ8kPKMM	CUIDADOS PRIMEIRA VIAGEM: vacinas certificado internacional e dicas	no		1549836005	Apure Guria!	UC-6_6nA-v9W057U5sX3tTXg	Travel & Events	6258	407	7	0.017199017199017	0	49
zzgEXRHlQc4	O que foi a GRIPE ESPANHOLA? - Inteliogia History #1	no		1530375003	Inteliogia	UCdRdaVD3_JxbG7R4c9tembQ	People & Blogs	12227	761	7	0.0091984231274639	0	103
SqQgYIRqfAU	Médicos esclarecem quem deve e quem não pode tomar a vacina contra a febre amarela	no		1509236418	Jornal da Record	UCmpHPgeCBgvk_fDXZQKsnAA	News & Politics	48852	269	35	0.13011152416357	0	18
Spf1OC9ceWE	A vacinação e o sistema imunológico	no		1500409791	afpbr	UCamgdcs45ToPrIV7wmT7iYg	News & Politics	48659	1016	13	0.012795275590551	0	0
jfoyDYtb8FA	AUTISMO LEVE? ♥Toque Materno Vlogs	no		1498143444	Toque Materno Vlogs	UCWeDz9iYFe7APda1DFMHLtw	People & Blogs	189785	7908	172	0.021750126454224	0
FqwrtvdpsWI	Sarampo: por que a doença voltou no Brasil e como preveni-la	no		1520875661	vejapontocom	UCV6Ue4o5UIeKQ3IEkjnXRlg	News & Politics	7562	93	12	0.12903225806452	0	9
YVktHOpgwFI	Dr Lair Ribeiro | UMA VERDADEIRA AULA sobre a Diabetes | Um DISTÚRBIO METABÓLICO (PARTE 4)	no		1536895148	Junior Hallak Medicina e Saúde	UCPR3gVNYBzi-02_O4noC1Zg	Science & Technology	151360	9885	162	0.01638846737481	0	185
a4CkTZdZFgE	#1 - Período da Campanha Nacional de Vacinação contra Sarampo e Poliomielite	no		1533045170	Ministério da Saúde	UC12zKGLhMhDeDidoctM6BrA	Nonprofits & Activism	13481	128	8	0.0625	0	13
aCeG1_U0zjA	IMUNOLOGIA BÁSICA - Dr Lair Ribeiro Vídeos	no		1457055283	Multimídia Produções	UCxm7PwK74oVJtyP0vN2qQIw	Education	228806	5539	123	0.022206174399711	0	0
cCgMQPtugjc	Fundador do Tugaleaks reafirma a sua inocência	no		1425660961	ESCUDO pt	UCvLNnnIZdqXYqAS-l8FLJFw	News & Politics	4916	42	1	0.023809523809524	0	14
bUSP4ARY_dk	#30 - Vacinas causam autismo? Sarampo? E muito mais...	no		1523183401	Podcast 2.1	UCNX-i6w11LltMBn66PacOfQ	Entertainment	579	12	1	0.083333333333333	0	1
2zq8GTBbAUw	Sarampo & Doenças Reumáticas: Devo Me Vacinar?	no		1531443038	Reumato TV	UCxjXoEYzVFwvKD53-gvxhYQ	People & Blogs	1166	110	1	0.0090909090909091	0	17
xqBoD-ha6H0	Por Que Vacinar?	no		1423702824	Eu Ciência	UCmOqIaUBwlSK6lVGC2o46JA	Science & Technology	45874	4886	32	0.0065493246009005	0	311
pP62PYHCDsA	ALERTA!!! Não Tome LEITE E IOGURTE!!! Dr. Lair Ribeiro Responde!!!	no		1539461458	SAÚDE & BEM ESTAR	UCe1XNXkGImWSq5n4wkzNjBw	People & Blogs	202144	12804	161	0.012574195563886	0	657
V9x_vVQjXwI	H1N1: Saiba como identificar os sintomas; medidas preventivas e as diferenças da gripe comum	no		1526037921	Meio norte	UCfRVh-QaAzJ45hmNmlwT32g	People & Blogs	7865	89	10	0.1123595505618	0	2
RpsFY4kOp5c	Todo Seu - Conversa sobre Autismo e Síndrome de Asperger (06/11/14)	no		1415369506	Todo Seu	UCW4t6ozY9VDVeN_GHK260BQ	Entertainment	97345	1842	75	0.04071661237785	0	146
KZx4TBgACL4	Autismo - Brincadeiras divertidas e educativas para crianças autistas // Viver Bem	no		1503692037	Unimed Fortaleza	UCUtDAMp91VCfHTZ9_ypKRPA	People & Blogs	245924	9757	207	0.021215537562775	0	100
u4N3jrmdyCw	DTUP - Autismo: causas diagnóstico acompanhamento e vida adulta	no		1449669589	Rede Super de Televisão	UCFl00VTEDEA0cHCoMQ7CuZg	People & Blogs	22923	628	12	0.019108280254777	0
DCkKOZP6qZ4	ROTINA DE UMA VAQUEIRA PARTE 1	no		1482954806	Alessandro dutra do nascimento	UCoB_4Ec1pWpcf9mhyPfyvlw	Film & Animation	23615575	62872	26268	0.41780124697799	0	1864
LwoX9v88v1E	LISTA NEGRA de Alimentos Vilões | Para pessoas no Espectro Autista	no		1562414402	Juntando as Peças do Autismo	UCf9lX9Vc4CWBUKQxVfZ6MtQ	People & Blogs	5429	436	8	0.018348623853211	0	23
KfkSsi0Tmk0	Crises de agressividade no TEA | 5 Minutos	no		1522501202	NeuroSaber	UCghJZXv-Cg90zgdeTZCt_-A	Education	21693	1128	68	0.060283687943262	0	39
0ZGEeQ_Mvu4	Atividade para crianças com autismo - aprendendo cores e formas	no		1513368380	Super Spectro	UC2pQFYIrk5mg9x-LRM9TzYw	Education	24948	379	17	0.044854881266491	0	1
MjavUHYPr8U	Gado Nelore - Desembarcando Marcando Vacinando e Colocando Brinco - Irmãos Mach´s	no		1550491202	Irmãos Mach’s	UCtEEov46xWiYPdcJg-frWtg	Pets & Animals	1533856	11470	2387	0.20810810810811	0
x6R4_FOR1pM	COMO LIDAR COM BIRRAS E CRISES DA CRIANÇA AUTISTA | Lagarta Vira Pupa	no		1505173048	Andréa Werner	UC3lP5c55UE0ozG-uN0uBsXg	People & Blogs	373083	19757	283	0.014324037050159	0
_eL6iAaUREo	A grande irresponsabilidade dos antivacinas	no		1567187921	MICHELSON BORGES	UCUw7hCgpimep4N_oEmG7G4g	Nonprofits & Activism	5386	773	91	0.11772315653299	0
cBENTxbBt40	AUTISMO LEVE - 7 ERROS NO DIAGNÓSTICO E TRATAMENTO I MARIA CLAUDIA BRITO	no		1533489974	Dra Maria Claudia Brito	UCFbx6QBTcDI6toOnO-EyajQ	People & Blogs	231440	12298	167	0.013579443812002	0	542
4AO_UAbom8g	MATÉRIA ESPECIAL SOBRE AUTISMO	no		1459527398	SBT Nova Mutum	UCV5oxb6HtQR-ZptUGtnoPZA	News & Politics	91238	2582	47	0.018202943454686	0	130
7j94SZumBlU	Terapia Comportamental - 3 Dicas para Birra!	no		1529596206	Mayra Gaiato	UC42k7FI53tnSSIjgzW-rbLA	Education	115210	7963	94	0.011804596257692	0	180
pdEWHr0I3ZA	Saiba identificar os sintomas do Autismo [PE no Ar - 13 01 16]	no		1452805756	TV Clube PE	UCOFMoDHG-vKXs-f5vcG7JaQ	People & Blogs	321884	2167	133	0.0613751730503	0	84
DHAvrlM7ObA	Autismo - Olhar Quando Chamado - Como Fazer?	no		1536847201	Mayra Gaiato	UC42k7FI53tnSSIjgzW-rbLA	Education	35169	3198	19	0.0059412132582864	0	95
VJEusa5fBig	Autismo - Como NÃO brincar com uma Criança com Autismo	no		1542718853	Mayra Gaiato	UC42k7FI53tnSSIjgzW-rbLA	Education	132305	12201	71	0.0058191951479387	0	207
D4StEQbBeEc	10 PRIMEIROS SINAIS de AUTISMO em BEBÊS até 2 ANOS	no		1548679869	Dra Maria Claudia Brito	UCFbx6QBTcDI6toOnO-EyajQ	People & Blogs	239204	6903	136	0.019701579023613	0	291
aYM08A1z4CA	Haemophilus influenzae - Microbiologia	no		1529176500	Net Didata	UCXQHQFA87heyfElr-XajQPg	Education	3635	97	9	0.092783505154639	0	8
c_taAGvTz7Q	BENEFÍCIOS DA EQUOTERAPIA - AUTISMO	no		1430779751	MMarchadorTV	UCjFAEaZfULixCSOCIvY9qNw	Pets & Animals	12519	240	7	0.029166666666667	0	6
rLe6eGHnpLI	AUTISMO LEVE ou SUSPEITA: DICAS PRÁTICAS I MARIA CLAUDIA BRITO	no		1534107604	Dra Maria Claudia Brito	UCFbx6QBTcDI6toOnO-EyajQ	People & Blogs	139320	8101	73	0.0090112331810888	0	284
Y9Fgywuls2s	Papo de Pai com Marcos Mion:​ Como foi descobrir que seu filho era autista?	no		1516297755	Papo de Pai	UC1r7Gt4v-OD8domIE0Vw2Zg	People & Blogs	361778	13141	303	0.02305760596606	0	330
wSnyktkxN5I	Diagnóstico Médico de Autismo	no		1567893605	Felippe Vanessa	UC5ACo310tjp353abzLc6sVQ	People & Blogs	6883	1000	2	0.002	0	244
TLfJbqjfuFk	Direitos dos Autistas. Collab com o advogado Thiago Müller	no		1526991736	Falando de Autismo com Ana Paula Müller	UCJl_ERzQBci1wgg3UdM1bVQ	Education	44009	2470	41	0.016599190283401	0	310
LcMZunV9s88	5 DIREITOS DOS AUTISTAS - AUTISMO	no		1520794645	Meu Anjo Azul	UCoi5cG7JL_kZ-LGW6-PtZ_w	People & Blogs	125494	10324	149	0.0144323905463	0	845
4eVB3_p_G_c	CRITICAL VACCINE STUDIES - POR QUE OS MÉDICOS NÃO ESTÃO TOMANDO VACINAS? (DIA 01)	no		1560216959	Qvida Boa	UCJIKKHplhnzcDmpztqUO7nA	People & Blogs	1402	223	8	0.035874439461883	0	58
ySoNhvSXhNI	Coisas que todo autista gostaria que você soubesse	no		1458564227	Diário de um autista	UCbhT_vtlwr7X2wG6q_0mWVQ	People & Blogs	803576	94240	502	0.0053268251273345	0	3942
93fAp_QENy8	Study finds no evidence of link between measles vaccine and autism	no		1551749006	CBS News	UC8p1vwvWtl6T73JiExfWs1g	News & Politics	11826	180	110	0.61111111111111	0	721
buGN-jnQUmk	Vacinando o Gado Nelore. No Sitio 3 Irmãos. Em Noroagro MT	no		1525910861	VINICIUS FLEX 10	UCJglPPxxQQtFg-78dIkRqNg	People & Blogs	560397	1285	275	0.21400778210117	0	24
XFJ8xgdfbew	Quem está amamentando pode tomar a vacina contra febre amarela?	no		1518813087	Ministério da Saúde	UC12zKGLhMhDeDidoctM6BrA	Nonprofits & Activism	5407	40	1	0.025	0	1
GXmOoUgYbP4	Sarampo: Transmissão e Sintomas - Você Bonita (08/05/18)	no		1525804419	Você Bonita	UCxucJ9P3mLMneYypLZYn2uw	Howto & Style	24178	356	29	0.081460674157303	0	15
0zLg5Kp7gIk	Sintomas do Nascimento dos Dentes - Conversa de Mãe	no		1472565600	Macetes de Mãe	UCTrx5uG9vJjTLloAH8hE-pg	People & Blogs	438055	15427	454	0.029428923316264	0	679
qKsjypG83p4	Em briga de marido e mulher se mete a colher sim: entenda sobre violência doméstica contra a mulher	no		1580928986	Ver Mais Londrina	UCGfBE94turq_hyKMxB-Dfrg	People & Blogs	47	1	0	0	0
hs3MsGWV0Ko	Idosos: Saúde cuidado e vitalidade | Ao Vivão #10	no		1531404002	Drauzio Varella	UC9zqTTVeClpqMQ5CLuJdWtw	Science & Technology	21418	1320	17	0.012878787878788	0	54
CK_cRiQq1Q4	Entenda quais são os sintomas do sarampo e quem deve ser vacinado	no		1532345732	Jovem Pan News	UCP391YRAjSOdM_bwievgaZA	News & Politics	21474	303	19	0.062706270627063	0	10
am9XxFOMkt8	Dica de Saúde - Vacina Pentavalente	no		1343932464	TV UFMS	UC4p7d_1KehpvAb7_9-WlkdA	News & Politics	33961	260	42	0.16153846153846	0	15
Gc97RioqWlA	Sarampo - Conheça os sintomas e como se prevenir	no		1532124063	Sabin Medicina Diagnostica	UCsPBsWBocgY1BxKS0FVca0g	Entertainment	28944	222	9	0.040540540540541	0	4
INFCldn3lhU	O QUE CAUSA MANCHAS VERMELHAS NO CORPO DE CRIANÇAS?	no		1513774801	DOUTOR AJUDA	UC1Nm7gQCcGvgLyVcGTXp-Ww	Education	241154	4445	228	0.051293588301462	0	75
GCGRnNn8Fs8	Saiba tudo sobre rubéola	no		1570733532	TV Aparecida	UCfYrK5JU5EznsnK3wQE7iIg	Entertainment	4044	112	4	0.035714285714286	0	3
rRKQb0-mPUo	Webpalestra - Sarampo: diagnóstico precoce e cobertura vacinal	no		1558981458	TelessaudeSC	UCg3fYev0mdtUvJvFJpQUM8g	Education	6521	193	5	0.025906735751295	0	10
_UJEBLg5CzQ	Sarampo: Sintomas e tratamento - Parte 2	no		1393355969	Unimed Fortaleza	UCUtDAMp91VCfHTZ9_ypKRPA	People & Blogs	38624	439	28	0.06378132118451	0	27
geC-MuQw6KQ	Varfarina (Marevan)	no		1543414037	Manual Do Paciente	UC1M8HoHfvAfBpNnkGoMxX1w	People & Blogs	17847	1020	17	0.016666666666667	0	64
SQaqQpPlZAA	Hanseníase - Você Bonita (18/09/17)	no		1505757646	Você Bonita	UCxucJ9P3mLMneYypLZYn2uw	Howto & Style	60369	1087	58	0.053357865685373	0	95
6x5eGvvLNaY	Mito ou verdade? Bebida alcoólica corta o efeito do antibiótico?	no		1381163619	Jovem Pan News	UCP391YRAjSOdM_bwievgaZA	News & Politics	622579	7635	345	0.045186640471513	0	488
1bf4bptbeRE	VACINA DE 1 ANO E 3 MESES - REAÇÃO | Vem com a Mãe	no		1542154107	VEM com a MÃE!	UCqGCcfns6j4zlcAODLOeMDg	People & Blogs	5966	129	14	0.10852713178295	0
0FIfFX8aluU	Tudo o que você precisa saber sobre a tuberculose	no		1553006207	TV Aparecida	UCfYrK5JU5EznsnK3wQE7iIg	Entertainment	11493	449	11	0.024498886414254	0	26
0uHsfcGY_tw	Reações às vacinas: alergia a ovo	no		1554907782	Ministério da Saúde	UC12zKGLhMhDeDidoctM6BrA	Nonprofits & Activism	1730	15	9	0.6	0	1
jpqe_Wcu3HM	Ver Mais Londrina Ao Vivo | Assista à íntegra de hoje e como fazer as receitas | 04/02/2020	no		1580842339	Ver Mais Londrina	UCGfBE94turq_hyKMxB-Dfrg	People & Blogs	313	16	0	0	0	0
9IciHcr6O6I	Aumento nos casos de sarampo reforça campanha de vacinação em SP	no		1563671549	Jornal da Record	UCmpHPgeCBgvk_fDXZQKsnAA	News & Politics	2357	31	5	0.16129032258065	0	1
YwiOVQkQC_0	24 HORAS COM A GENTE | VACINA DE 2 MESES | REAÇÕES	no		1542464996	Jéssica Gomes	UCL0sWgefmtjUNvtBafXQmhA	People & Blogs	9609	380	10	0.026315789473684	0	27
vJ2nZXlV7vo	Tudo sobre a rubéola – o que é prevenção sintomas e evolução | Sua Saúde na Rede	no		1539692489	Sua Saúde na Rede	UC_er6_R1PKUCxc7QSXxIvzw	Education	18298	425	19	0.044705882352941	0
lr8kXuYuSPs	NÃO POSSO MAIS COMER OVOS! E AGORA? - INTOLERÂNCIA ALIMENTAR - NUTRICIONISTA JACIARA PETRY	no		1537312501	Jaciara Petry	UCNa5CND4GBCDxwHFB51EAbw	People & Blogs	2474	124	7	0.056451612903226	0	24
1x6itgMtz6s	Clínica de Vacinas Unimed Londrina em 360º	no		1550077232	Unimed Londrina	UCegeG7JEKeXThmcZ8BjtvsQ	People & Blogs	12022	21	3	0.14285714285714	0	2
shNHDAUmIAE	Invasão da pizza: telespectadora de oito anos ganhou convites para o circo do sonho	no		1580928884	Ver Mais Londrina	UCGfBE94turq_hyKMxB-Dfrg	People & Blogs	41	1	0	0	0
X7NryYy5z2o	VACINA DE 2 MESES #VLOG REAÇÕES DICAS CUIDADOS	no		1533330003	Priscila Faria	UCpvhFBKf_dacTd8NFRgcTxQ	People & Blogs	14336	400	19	0.0475	0	48
vsefrL9-_KI	Quadro juntas e vida real: namoro ou casamento a distância dá certo?	no		1581102045	Ver Mais Londrina	UCGfBE94turq_hyKMxB-Dfrg	People & Blogs	150	7	0	0	0
Gui35PP-Py4	Tuberculose óssea/ Tuberculose Miliar disseminada! Meu diagnóstico.	no		1535544232	Jessica Sousa	UCcRcXycIYgXJcxiur0pzLPg	People & Blogs	4516	208	6	0.028846153846154	0	52
vOE7n23dOac	SÍFILIS CONGENITA DIAGNÓSTICO Fátima Rocha	no		1533322431	canal meu jeito de ser mãe	UC1xM1iuftFCqlZO-omXZesg	People & Blogs	17355	318	17	0.053459119496855	0	60
1DK0ybUcJxQ	Afinal Hepatite B tem cura ou não tem ? Por que sumiu e agora voltou ?	no		1547335097	Anna Krystina	UCIWKfj-9SxZetO6DVzDIlww	People & Blogs	5033	256	22	0.0859375	0	60
qkXTWFPtIHM	Hepatite B – Descubra quais são as causas sintomas e como prevenir.	no		1535022358	Brazil Heath	UCAAqC3FgQfWxu_ui-1gynzQ	People & Blogs	18946	282	32	0.11347517730496	0	5
1f8XkB5fkVc	Meningite Viral – O que é causas sintomas fatores de risco tratamentos e também como prevenir.	no		1534581330	Brazil Heath	UCAAqC3FgQfWxu_ui-1gynzQ	People & Blogs	2887	38	6	0.15789473684211	0	0
i1Vx3Mrwbzk	Conheça 8 mentiras sobre a vacinação	no		1565645861	Ministério da Saúde	UC12zKGLhMhDeDidoctM6BrA	Nonprofits & Activism	899	45	1	0.022222222222222	0	1
_dKwq77_U9g	Vacinação de gado	no		1421692906	unespvideos	UCwHCkGOaMvG2kz7b-jhi2qA	Education	62872	260	55	0.21153846153846	0	1
iz1oqofBo_o	COMIDA DE GELATINA vs COMIDA DE VERDADE!! (COM MINHOCA COMESTÍVEL)	no		1520632802	LUCCAS NETO - LUCCAS TOON	UC_gV70G_Y51LTa3qhu8KiEA	People & Blogs	18397536	436477	26483	0.060674445617982	0
6i6v9f_aWjg	A Revolta da Vacina	no		1509386068	TV Senado	UCLgti7NuK0RuW9wty-fxPjQ	Education	125672	4165	56	0.013445378151261	0	64
ObvVCIwOYi8	Viva Mais SUS - Sífilis	no		1528230813	Ministério da Saúde	UC12zKGLhMhDeDidoctM6BrA	Nonprofits & Activism	7933	126	1	0.0079365079365079	0	2
dIyt7dBmsTs	#FalaGotinha - Vacinas para adultos de 20 a 59	no		1546025302	Ministério da Saúde	UC12zKGLhMhDeDidoctM6BrA	Nonprofits & Activism	4036	71	0	0	0	1
zVzafAmGpWE	Ministério da Saúde atualiza situação sobre o novo coronavírus (31.01.2020_ parte 1)	no		1580499427	Ministério da Saúde	UC12zKGLhMhDeDidoctM6BrA	Nonprofits & Activism	2777	118	3	0.025423728813559	0	4
ANfpF0pNob4	Ministério Zoe - Aquieta Minh alma - Web Clip	no		1483300755	Ministério Zoe Vida de Deus	UCa-AC7YhCP5u5yO5aNjKjoA	Music	298365650	1879269	140121	0.074561438516785	0	82311
bccARjBNCYk	Mentira 2 - Conheça 8 mentiras sobre a vacinação	no		1565648767	Ministério da Saúde	UC12zKGLhMhDeDidoctM6BrA	Nonprofits & Activism	425	24	0	0	0	0
r_8ufdEh4H4	JA FIZ TATUAGEM E AGORA NÃO VOU PRO CÉU? EXISTE BLASFÊMIA EM PENSAMENTO??	no		1531920544	Igreja Santidade e Arrependimento	UCcs0knrjjReJHuF5lsBBbiw	Entertainment	39333	3241	44	0.013576056772601	0	225
GxKsks3CZKg	Ministério da Saúde atualiza situação sobre o coronavírus - 03.02.2020	no		1580767714	Ministério da Saúde	UC12zKGLhMhDeDidoctM6BrA	Nonprofits & Activism	2136	128	14	0.109375	0	9
YkLV2CFxPBs	Como antecipar o cio das vacas - Boi Saúde	no		1421717309	Boi Saúde	UCB9iWAdLYM9GzeKOaOBYH2Q	People & Blogs	121800	2429	88	0.036228900782215	0	115
eaVKsoJWZrY	Movimento anti-vacinação faz lembrar a chamada revolta das vacinas	no		1393338956	Jornalismo TV Cultura	UCXdXYG8dUmEv6jhEji_lSHg	News & Politics	1808	31	2	0.064516129032258	0	0
ybAZ61N9PKw	5 alimentos que você deve parar de comer se tem diabetes!	no		1549215478	Dr. Marco Menelau	UCGbDaS58FGh45Oq4N-Qfhdw	Science & Technology	2969935	231861	5878	0.025351395879428	0	4032
J-ve8BkWHX4	La verita su vaccini antiparassitari e cibo per cani raccontata dal Dott. Prota	no		1566637209	Fashion Dog Italia	UCnQeN_JtknE5o6NHZeOMpXQ	Pets & Animals	849	38	5	0.13157894736842	0	6
tpoHZYPCyVA	Idosa contrai pneumonia após não tomar vacina da gripe	no		1530720425	Hoje em Dia	UCN-opsqqDunWO6h5uCp9Y4g	Entertainment	3482	88	13	0.14772727272727	0	27
eWZU86JsEmg	Dario Miedico vs Fabrizio Pregliasco - L obbligo vaccinale | Sottosopra 2019 › 2.1	no		1553357749	Sottosopra	UCL3HlT99aQ1004ojA7u6ETQ	Education	616	22	0	0	0	4
ebG36xtK87A	Marília Mendonça - BEM PIOR QUE EU - (Todos Os Cantos)	no		1536328936	Marília Mendonça	UCwfEOn0O1DWcyTgzVVu28ig	Music	406951900	1489645	80161	0.053812149874635	0	20832
vdD8IfWibQ0	TIPOS DE BEBÊS TOMANDO VACINA - VACINEI A DOUTORA	no		1480161675	Emilly Loise	UCQ1LWE9p0i3HxIpDZjiOKjg	Entertainment	6572427	35507	6274	0.17669755259526	0
kS_f6wr2o0c	Saúde e Defesa visitam local que receberá brasileiros vindos da China	no		1581119170	Ministério da Saúde	UC12zKGLhMhDeDidoctM6BrA	Nonprofits & Activism	586	31	1	0.032258064516129	0	7
IH9NOGjh8mA	Ci sono mercurio e metalli pesanti nei vaccini? - Comprendere i vaccini (video 7)	no		1506332498	La Chimica per Tutti!	UCN_Yp-5LABpTC1qLls2PXAA	Education	2233	84	35	0.41666666666667	0	185
TFAhiQSZLRg	Higiene íntima feminina e prevenção de doenças infecciosas - Mulheres (11/06/18)	no		1528752443	Mulheres	UCDtVoSwSwQgwhcC89Nlz5Vg	Entertainment	6657220	162650	6493	0.039920073778051	0	3205
sUGeHHOEqmQ	Olavo de Carvalho - Fake news ou verdade dolorida?	no		1540416671	Olavo de Carvalho	UC6RQhzm93SterWntL7GzqYQ	Comedy	224450	36369	292	0.0080288157496769	0	1577
GRgjv2RCk1s	Plicoma no Ânus. O que é isto?	no		1508636089	Dr. Fernando Lemos	UChXNyp6dL_aY_3qwVgDd-EQ	People & Blogs	4013024	173478	4176	0.02407221664995	0	2626
xJR2WjKLJzw	Evite o Alzheimer: apenas 1 exercício todas as noites antes de dormir	no		1527116604	Cura pela Natureza - As melhores dicas de saúde!	UCYSslASzgHQ_F_vuTsmmi-g	People & Blogs	1672835	58827	2076	0.035289917894844	0	469
TBrMS7mgOR8	Meu Médico me Alertou! Os Sinais que Seu FÍGADO Está Doente Estão Na Sua Frente	no		1553808600	Só Dicas Naturais	UCr-BdJEeyDNlPodHF1pUKOg	People & Blogs	3097221	157575	3652	0.023176265270506	0	5505
1Dc9R1gU6RQ	185(5) Autismo e Vacinas Um Tributo ao Dr James Jeffrey Bradstreet	no		1527204702	Bruno S. Alves	UCquENngBYGYpHYtN0OVYLKQ	People & Blogs	570	49	3	0.061224489795918	0	3
mW2p8lR9tZw	12 sinais de que sua tireoide não está funcionando como deveria	no		1540999285	Cura pela Natureza - As melhores dicas de saúde!	UCYSslASzgHQ_F_vuTsmmi-g	People & Blogs	1739679	46664	1935	0.041466655237442	0	453
WD3rOXk7xHI	HOUSE TEMPORADA 1 EP 2 - VACINA....	no		1495640333	MELHORES CENAS DO CINEMA	UC9z9JemVpHB7BJtXjESAsOw	People & Blogs	19226	268	4	0.014925373134328	0	4
Nq01IKRGNMQ	Dona do Pedaço - Descoberta ABALA Rock ao Descobrir GRANDE FARSA de Fabiana	no		1565108147	Aponta Vídeos	UC5KkuUqkQBF8yD3xqbLMigA	Entertainment	1025907	68034	1308	0.019225681277009	0	557
EjQRedV5KF4	Diabetes: Conhecido como Assassino Silencioso - Não Ignore Estes Primeiros Sintomas	no		1522547287	ISTO É INTERESSANTE	UCO3YT7cu0cxd8gSQ6nCf0qg	People & Blogs	1471554	40166	1412	0.035154110441667	0
PUavUeGCTCo	LEUCEMIA: 15 SINAIS QUE VOCÊ NÃO PODE IGNORAR!	no		1504044001	Remédios Caseiros Marcia	UCf4kyk1iMd03noNbDU2nNOg	People & Blogs	538610	9367	397	0.042382833351126	0	235
rVjsyWB0MPM	C è mercurio nei vaccini? Ne parla Stefano Montanari	no		1496309245	La Verità sui Vaccini	UCvm2Fxo8EavRB59AVNF7F2g	People & Blogs	11376	296	18	0.060810810810811	0	81
hAerhHh3XJo	I vaccini causano autismo? Ci sono troppi metalli pesanti al loro interno?	no		1553679110	Fondazione Umberto Veronesi Channel	UCCSQ6Dq4FDyN6rgWCt_uurQ	Nonprofits & Activism	586	10	14	1.4	0	101
4HYYM5u95EQ	Como funcionam as vacinas	no		1516806226	DECO PROTESTE	UCOjnB2Ul08J7jM9npAvo6EA	News & Politics	13363	78	8	0.1025641025641	0	0
Twl14tVz6BI	Segredo da Fortuna: ex-diarista vira empresária da construção civil	no		1469555866	Hoje em Dia	UCN-opsqqDunWO6h5uCp9Y4g	Entertainment	930801	15302	909	0.059403999477193	0	540
wLzI0U2hrtg	Conecta 19 - CNC	no		1576697773	Confederação Nacional do Comércio de Bens Serviços e Turismo	UC-4ddcVkyrXXbBqedYV4l9Q	Nonprofits & Activism	5462	6	0	0	0	0
K0EZyQBnpLU	Atriz Cláudia Rodrigues fala sobre a luta contra a esclerose múltipla	no		1461776427	Hoje em Dia	UCN-opsqqDunWO6h5uCp9Y4g	Entertainment	328400	5396	211	0.039103039288362	0	281
K_IOwz8GasE	Surto Epidemia Pandemia e Endemia - Prof. Paulo Jubilut	no		1351137822	Biologia Total com Prof. Jubilut	UCG-eghyORxNrzSG8FkAWKyw	Education	497571	15597	165	0.010578957491825	0	392
30Jzc1pu-Q4	O MAIOR ERRO DAS PESSOAS POBRES (3 Tapas de Realidade) | Oi Seiiti Arata 105	no		1521406800	Arata Academy	UCEdgNBcBybRtwv836C8El4g	Education	4997872	248730	7952	0.03197040968118	0	6822
0UjGi_3Q25k	Profissão Repórter 15/09/2015 Idosos (Alzheimer)	no		1442432632	Mercenarios	UCaNOyWyEVojnz4AolKeDFFA	Entertainment	613095	8446	331	0.039190149183045	0	625
3BtyWQryUBQ	Projeto Carreiras da Saúde | Imunização | Calendário Nacional de Vacinação 2017 | Profª. Fernanda	no		1485365679	Gran Cursos Online - Concursos Públicos	UC74icFVsxTFr2BW3Vm8n_iw	Education	43724	876	46	0.052511415525114	0	20
ZvsPo8Am4Cs	Webaula - Vacina BCG ID	no		1528829269	Centro de Telessaúde HC-UFMG	UCnyFZr3wJBAJRjcqr_Q5Gug	Education	6252	139	10	0.071942446043165	0	4
SLQZ3Iq_uWU	Gripe e Resfriado | Drauzio Comenta #01	no		1453138329	Drauzio Varella	UC9zqTTVeClpqMQ5CLuJdWtw	Science & Technology	1940726	66076	1697	0.025682547369696	0	2111
NzZkr_m_DSc	Teste seus conhecimentos sobre vacinas	no		1531523821	Governo do Brasil	UCOwuzVSWrrAdRIviGN7-T5g	News & Politics	5012	74	5	0.067567567567568	0
3gxq9wa_0kg	Microbiologia e Imunologia - Aula 09 - Vacinas	no		1524773778	UNIVESP	UCBL2tfrwhEhX52Dze_aO3zA	Education	4564	123	2	0.016260162601626	0	0
HYKmOMZJWd4	Este Teste Lendário Revelará a Verdade sobre Sua Personalidade	no		1512086309	INCRÍVEL	UCIQPHl1WKKTt9KkWyo_JNig	People & Blogs	3139218	130911	17433	0.13316680798405	0	11198
0DuHI0E6Bc4	#6 Qual a importância da Vacinação Infantil?	no		1533155035	Ministério da Saúde	UC12zKGLhMhDeDidoctM6BrA	Nonprofits & Activism	13382	147	5	0.034013605442177	0	2
u6Sb4TtFp5E	Plantão X - Vetores e Suas Doenças	no		1467747929	Canal ProjetoX	UCJXAScTUxxfPzwLzZc3VUHA	Education	72671	2974	59	0.019838601210491	0	64
fk5pWfmgXaw	Jovens e adolescentes precisam de vacinar contra HPV e Meningite	no		1521153517	Ministério da Saúde	UC12zKGLhMhDeDidoctM6BrA	Nonprofits & Activism	23544	145	6	0.041379310344828	0	3
4xxk1ZycS-4	Segredos que o INSS não te conta!	no		1528282801	Liliana Delfino	UCysFgzeqkdh4FU3g3jUvCbw	News & Politics	3146662	239214	4802	0.020074075932011	0	3641
h7g3SWSpm_4	Diabetes: Não Ignore Estes Primeiros Sintomas	no		1521239329	INCRÍVEL	UCIQPHl1WKKTt9KkWyo_JNig	People & Blogs	1352866	46395	1429	0.03080073283759	0	2001
YYbrHZqGsEA	Entendendo o Sono com um Neurologista (13/06/16)	no		1465923808	Todo Seu	UCW4t6ozY9VDVeN_GHK260BQ	Entertainment	321680	11173	333	0.029803991765864	0	313
qOKTzmlc6QQ	Vacina BCG (Atualização de 2019) - Profa. Juliana Mello	no		1550516894	ENFrente Enfermagem Continuada	UCD9kk0EUEtflrRl6TV0lDyA	Education	13840	852	12	0.014084507042254	0	36
9oF5tcWA2rA	5 dicas para conquistar o que quiser! - Georg Frey - Mentor: georg@uach.com.br / (81) 99971-9876.	no		1478028313	UACH	UC-TJtIntyZTj34lwLdSo2xQ	People & Blogs	2072302	82967	3180	0.038328492051056	0	2494
IcyZC34q_qU	Entrevista de estágio com Roberto Justus	no		1339255418	ThePetroWorld	UCo8W6UskksVPEfNj09a9dMA	Science & Technology	1739709	22600	1014	0.044867256637168	0	1619
vdNf6OnnWZY	Vacinar é proteger 7 - Especialista exalta segurança das vacinas produzidas no Brasil	no		1499725229	Ministério da Saúde	UC12zKGLhMhDeDidoctM6BrA	Nonprofits & Activism	303	12	0	0	0	0
js87s7_aQOs	História bizarra da psicologia | O estranho caso da vacina	no		1538084433	Planeta de Livros Brasil	UCqLpSeS-N7XDLkyta9QjHbw	Entertainment	171	16	0	0	0	1
8t9MDPsCHh4	🔴 Quais doenças geram direito à aposentadoria por invalidez?	no		1467858100	Saber a Lei	UCqnZW-G3y8afNMyYb821u6g	Education	3590519	112317	3811	0.033930749574864	0	3283
0oPBb0RPer0	ACORDANDO MUITO À NOITE PARA URINAR?	no		1529931788	Dra. Carla Frohmuller	UC3MmhFxndlz10oOgXvuvLPQ	Education	1344566	48869	1802	0.036874091960138	0	182
_7weBsPCBj0	Como o câncer se desenvolve	no		1501088235	Pedro Cunha	UCw3HLkyWjI3tD1RQTGEe8LA	People & Blogs	875409	32168	594	0.018465555831883	0	1209
gwUx552ZYRA	VICIADOS EM CRACK: TUDO SOBRE A SUBSTÂNCIA E SEUS EFEITOS	no		1496844005	DOUTOR AJUDA	UC1Nm7gQCcGvgLyVcGTXp-Ww	Education	702421	14984	502	0.033502402562734	0	1277
qC3jCyGPDek	Vacina - Trabalho de Biologia @Bio	no		1415321660	Brunna Cristina	UCijEMORybIdM0CWLJaHjQGA	People & Blogs	38	1	0	0	0	0
odimsr2jEFU	Psicologia Pediátrica - Humanização e Vacinação	no		1542297366	Carol Lima	UCCq8mh725qRQn8g2_PvibpA	People & Blogs	77	1	0	0	0	0
MCCMLxPrA2k	Toxicologia dos metais pesados Chumbo e Mercúrio	no		1432425534	Marlithon Oliveira	UCzp_5fGv8jy8uf_Jl46nR2A	Film & Animation	37339	555	10	0.018018018018018	0	17
40hZM-x68Wg	Intoxicação subclínica por metais pesados	no		1331581583	Clínica Higashi	UCJwqS9dQlV62tpNkqbNTZ8g	Science & Technology	33366	729	15	0.020576131687243	0	32
yFC5TXyJQ7I	7 doenças que incrivelmente dão superpoderes	no		1521066601	Fatos Desconhecidos	UCbAiIkPobUFy71zlmwVw3jw	Entertainment	952068	74826	926	0.012375377542565	0	5013
Eo02PzGQLH4	NUNCA COLOQUE MERCÚRIO NO SAL OU ISSO PODE ACONTECER!	no		1510092139	Área Secreta	UCcFgREmujdPHvA7I_VOmgIA	Entertainment	3010318	262324	17906	0.068259099434287	0	8033
PyhNfQxF5lI	VASSOURAS DE PÉ: Fenômeno seria Causado por Bug na Rotação da Terra?	no		1581282002	Canal do Schwarza	UCWq1xltHB2fDe6YkYoOrryg	Entertainment	40802	8491	68	0.0080084795665999	0	364
5s2OuChi-Ek	Conheça o Verdadeiro Motivo da NASA não Voltar mais à Lua | Lenda ou Fato?	no		1495116000	Canal do Schwarza	UCWq1xltHB2fDe6YkYoOrryg	Entertainment	5547368	137202	8389	0.061143423565254	0	7840
bvXwPiro8sY	GOOGLE Desenvolve a Réplica mais Completa de um Cérebro!	no		1580948874	Canal do Schwarza	UCWq1xltHB2fDe6YkYoOrryg	Entertainment	32497	5767	66	0.011444425177735	0	229
6BgYYh-6i2A	Estrela Vira Buraco Negro sem Explodir - Os Mistérios de Júpiter | 5 Vídeos Sobre Ciência	no		1496082922	Canal do Schwarza	UCWq1xltHB2fDe6YkYoOrryg	Entertainment	113631	12563	101	0.008039481015681	0	407
e_7oqIduYsg	Criaram o Primeiro Robô VIVO do Mundo Usando Células de Sapo e Inteligência Artificial!	no		1579732201	Canal do Schwarza	UCWq1xltHB2fDe6YkYoOrryg	Entertainment	75294	12204	79	0.0064732874467388	0	676
ednl5kbHCVQ	Qual a Relação do Tomate e o Magnetismo? -- Você não tem Apenas 5 Sentidos Veja quais são os outros	no		1580079623	Canal do Schwarza	UCWq1xltHB2fDe6YkYoOrryg	Entertainment	19928	3639	40	0.010992030777686	0	68
I7Tme3TYb0Y	Quinta Força da Natureza? - Experimento do CERN Caça Misteriosa Partícula X17	no		1579127241	Canal do Schwarza	UCWq1xltHB2fDe6YkYoOrryg	Entertainment	28103	5016	37	0.0073763955342903	0	204
0ts-OuNGZK8	Como Seria o Céu Iluminado por Uma Supernova? - O que é a Lua Negra? | 5 Videos Absurdos	no		1475503201	Canal do Schwarza	UCWq1xltHB2fDe6YkYoOrryg	Entertainment	137203	12688	82	0.0064627994955864	0	357
o1igEDbmZOc	Construíram um ACELERADOR DE PARTÍCULAS do Tamanho de um Chip de Computador!	no		1579300200	Canal do Schwarza	UCWq1xltHB2fDe6YkYoOrryg	Entertainment	23348	4521	20	0.004423800044238	0	138
2-YMhxnEdyg	Som Captado nos Anéis de Saturno Intriga Cientistas - Betelgeuse de Perto | 5 Vídeos Sobre Ciência	no		1494252000	Canal do Schwarza	UCWq1xltHB2fDe6YkYoOrryg	Entertainment	85182	10731	96	0.0089460441710931	0	330
ToeUcsCh_xE	Um Novo (e Estranho) Objeto é Encontrado no Centro da Galáxia	no		1579816804	Canal do Schwarza	UCWq1xltHB2fDe6YkYoOrryg	Entertainment	53316	7978	93	0.011657056906493	0	242
YHH2RCttiKs	Físico Diz que Buracos Negros irão Destruir o Universo | PoligoPocket	no		1494943205	Canal do Schwarza	UCWq1xltHB2fDe6YkYoOrryg	Entertainment	52377	7993	51	0.0063805830101339	0	446
C1JB8-9TC_Y	Relatividade Confirmada Outra Vez - A Terra Durante um Ano Netuniano | 5 Vídeos Sobre Ciência	no		1497301200	Canal do Schwarza	UCWq1xltHB2fDe6YkYoOrryg	Entertainment	84895	11574	92	0.0079488508726456	0	329
IlEovwrFLGQ	ANTIMATÉRIA (Por Que Você Deveria Ficar Longe de Bananas)	no		1523628004	Ciência Todo Dia	UCn9Erjy00mpnWeLnRqhsA1g	Science & Technology	840832	104982	773	0.007363167019108	0	2512
muTlkLU2Dak	CORONAVÍRUS: OMS Admite Erro em Relatório e Eleva Vírus Para Alto Risco Global	no		1580162825	Canal do Schwarza	UCWq1xltHB2fDe6YkYoOrryg	Entertainment	221180	26326	298	0.011319607992099	0	2897
UuwpfItdv4U	Raio de Energia Estranho Parece Viajar a 5 Vezes a Velocidade da Luz | PoligoPocket	no		1495634402	Canal do Schwarza	UCWq1xltHB2fDe6YkYoOrryg	Entertainment	169167	16451	173	0.010516078049967	0	416
EZ-02iTzlEc	Autismo leve - História da Bebella - bate papo com Bianca Bittencourt	no		1501156891	Aline Vicente	UCA1nC2t2zfzBOySscmpIzGQ	People & Blogs	147228	9770	106	0.010849539406346	0
BJSpxZL52q8	O Dinossauro Mais Bem Conservado do Mundo - Como os Fósseis se Formam? | PoligoPocket	no		1495029604	Canal do Schwarza	UCWq1xltHB2fDe6YkYoOrryg	Entertainment	110146	11331	87	0.007678051363516	0	340
I9P5KdQOAQw	O que a NASA Esconde em Marte? | Lenda ou Fato?	no		1496955601	Canal do Schwarza	UCWq1xltHB2fDe6YkYoOrryg	Entertainment	85655	8632	184	0.021316033364226	0	406
0lgRM3UAXJs	Einstein Confirmado: Buracos Negros são Mesmo Buracos no Universo | Fora da Caixa	no		1496437201	Canal do Schwarza	UCWq1xltHB2fDe6YkYoOrryg	Entertainment	297271	30934	594	0.019202172366975	0	1025
d4ZSDrwZECk	Veja os BURACOS NEGROS em Escala e se Sinta um Inseto | PoligoPocket	no		1479827896	Canal do Schwarza	UCWq1xltHB2fDe6YkYoOrryg	Entertainment	90611	12787	77	0.006021740830531	0	592
cIrDqCRR_sM	Novos Dados da Juno Revelam: Júpiter é mais Complexo do que se Imaginava | LIVE	no		1495757901	Canal do Schwarza	UCWq1xltHB2fDe6YkYoOrryg	Entertainment	38771	3078	66	0.021442495126706	0	202
pqyEEOEy-rQ	Planeta Parecido com a Terra é Encontrado em Nosso Quintal | PoligoPocket	no		1496171062	Canal do Schwarza	UCWq1xltHB2fDe6YkYoOrryg	Entertainment	86982	11291	96	0.008502347002037	0	393
4rp2o0IeP5w	Efeitos deletérios do mercúrio no organismo	no		1512137123	Dra. Andreia Torres	UC81fUuO3oGR-ju7tEAuyNPA	Education	22801	771	15	0.019455252918288	0	114
QWkdWgviVl8	Minha Visão de Deus | Fora da Caixa	no		1481288404	Canal do Schwarza	UCWq1xltHB2fDe6YkYoOrryg	Entertainment	160230	22721	513	0.022578231591919	0	2392
IJxnMlk4AvU	A Primeira Evidência de um OUTRO UNIVERSO Além do Nosso? | PoligoPocket	no		1493822285	Canal do Schwarza	UCWq1xltHB2fDe6YkYoOrryg	Entertainment	131029	16648	98	0.0058865929841422	0	543
RpGXRkXdHbA	Olho que Tudo Vê Surge No Céu do Reino Unido - Documento da NASA Confirma Nibiru? | Lenda ou Fato?	no		1494604022	Canal do Schwarza	UCWq1xltHB2fDe6YkYoOrryg	Entertainment	81177	8769	121	0.013798608735318	0	382
B72hElBk9BA	O Brasil Ainda tem Solução? | Fora da Caixa	no		1495232907	Canal do Schwarza	UCWq1xltHB2fDe6YkYoOrryg	Entertainment	61205	10462	159	0.015197858917989	0	936
oWn9m_-w_tY	Seu Corpo no Espaço e Aquecimento Global | Primata Falante	no		1506697132	Primata Falante	UC876uazcW8p7wdl3JdbVIaA	Science & Technology	48609	6432	150	0.023320895522388	0	748
kNayDUMJ18w	Google Sky Censura Parte Do Céu Relacionado a Profecia Bíblica do Apocalipse | Lenda ou Fato?	no		1498169824	Canal do Schwarza	UCWq1xltHB2fDe6YkYoOrryg	Entertainment	251186	20867	788	0.037762975032348	0	1205
fI7idPHcr1I	Novidades Sobre o Planeta 9 - Passeio em Plutão - A Menor Estrela | 5 Vídeos Sobre Ciência	no		1500333006	Canal do Schwarza	UCWq1xltHB2fDe6YkYoOrryg	Entertainment	75135	10617	88	0.008288593764717	0	393
w9cmAxJGK2s	Seu Cérebro é Confiável? Testes e Ilusões de Ótica Para Confundir sua Cabeça | PoligoPocket	no		1494338407	Canal do Schwarza	UCWq1xltHB2fDe6YkYoOrryg	Entertainment	35318	5588	55	0.0098425196850394	0	419
saIXYZKXZGY	Estudo Confirma: Júpiter é o Planeta mais Antigo do Sistema Solar e Ajudou a Molda-lo | PoligoPocket	no		1497474002	Canal do Schwarza	UCWq1xltHB2fDe6YkYoOrryg	Entertainment	66381	8942	52	0.0058152538581973	0	322
oJLDw5xc98E	Experimento Sugere que a Realidade NÃO Existe se não for Observada | AstroPocket	no		1534294356	Canal do Schwarza	UCWq1xltHB2fDe6YkYoOrryg	Entertainment	425953	46455	908	0.019545797007857	0	2495
-vpdi-f12Ag	Polos de Júpiter São Diferentes de Tudo que já se Viu - Cometa Maior que o Sol? | 5 Vídeos Absurdos	no		1473084001	Canal do Schwarza	UCWq1xltHB2fDe6YkYoOrryg	Entertainment	144557	13271	70	0.0052746590309698	0	596
wb_TuGCTNyw	Segundo Cientista Os Humanos Serão Extintos em 100 Anos | PoligoPocket	no		1435068002	Canal do Schwarza	UCWq1xltHB2fDe6YkYoOrryg	Entertainment	157267	12026	147	0.012223515715949	0	944
bTLxh2ZBGh4	Objeto Interestelar é uma Nave Alienígena? - Conversei Com um Astronauta! MOBFOG 2017 | AstroPocket	no		1513281603	Canal do Schwarza	UCWq1xltHB2fDe6YkYoOrryg	Entertainment	66642	7192	95	0.013209121245829	0	333
xBi_J-Zo7Wg	Estrela da Megaestrutura Alienígena Mobiliza Cientistas no Mundo Todo | PoligoPocket	no		1495548025	Canal do Schwarza	UCWq1xltHB2fDe6YkYoOrryg	Entertainment	74273	9287	106	0.01141380424249	0	240
KhO1FEIQPRs	5 Motivos Para Acreditar em Vida Extraterrestre | PoligoPocket	no		1393423205	Canal do Schwarza	UCWq1xltHB2fDe6YkYoOrryg	Gaming	52290	6205	53	0.0085414987912973	0	191
9NObHIomn2w	Monarquia é a Solução? - Bate Papo Sobre Política com o Diplomata Rômulo Neves!	no		1495494855	Canal do Schwarza	UCWq1xltHB2fDe6YkYoOrryg	Entertainment	13255	1304	108	0.082822085889571	0	108
by9fjZpua9w	PIRÂMIDES NA AMAZÔNIA - O Curioso MISTÉRIOS	no		1511526812	O Curioso	UC-qeHsCIc4DiYhmPq7cmLkQ	Entertainment	57075	5392	120	0.022255192878338	0	270
7vjuJjO2Y-0	A Terrível Intoxicação Por Mercúrio ► Parte 1/3	no		1499277284	Detox e Saúde	UCaJqv_9-pPiWRCI33WQD9ZA	Sports	12826	301	13	0.043189368770764	0	94
uhdrg5kdk_A	Explicando a Dobra Espacial: Seria possível chegar até Marte em Minutos?	no		1496101870	Canal do Schwarza	UCWq1xltHB2fDe6YkYoOrryg	Entertainment	39318	3088	81	0.026230569948187	0	165
1BoGhWFJfjQ	O Efeito Overview: O Mundo em Perspectiva | Fora da Caixa	no		1488553052	Canal do Schwarza	UCWq1xltHB2fDe6YkYoOrryg	Entertainment	41474	8020	93	0.011596009975062	0	392
gQTIC0vyBPo	🧬 H1N1: Drauzio Varella explica tudo sobre o vírus	no		1459994489	Portal Saúde Mais	UCSfmJw5USzP6Ca-uGPPsNRA	News & Politics	220281	2305	189	0.081995661605206	0	158
KqK9hVUQx1E	Descubra o Motivo de não Vermos Estrelas nas Fotos da NASA | PoligoPocket	no		1496264401	Canal do Schwarza	UCWq1xltHB2fDe6YkYoOrryg	Entertainment	81276	10323	179	0.017339920565727	0	689
wfvXvAQoprA	Evacuação do Umbral e Nova Raça Humana ‹ PAVA RESPONDE ›	no		1520949605	Canal do Pava	UCnH3v7ENZKWTqATMGdpKxBQ	Howto & Style	109909	7366	198	0.026880260657073	0	652
It5cZY11p8Q	POVO ALIENADO VEJA COMO O MERCÚRIO UTILIZADO NAS VACINAS DANIFICA O SEU CÉREBRO	no		1465412492	HUMANÆ LIBERTAS	UC0bD2v2yi9WoiupiOMV951Q	Nonprofits & Activism	804				0
X6AzUMm6W0c	Desmentindo a Globo AO VIVO Sobre as Campanhas de VACINAÇÃO!	no		1493298326	FOGO VIVO de YAUH יהוה	UCIFYUiFUWCQzDc9nc6KY2Ig	People & Blogs	164064	2492	300	0.12038523274478	0	499
_hao2wf01MU	Brahma a divindade Extraterrestre	no		1523648597	E Se For VERDADE?	UCIsrnGY0LfR4OT_PkfzAIJA	Gaming	417355	9962	1074	0.10780967677173	0	538
dnN92K3rzAc	STF mantém Lula preso e deixa para julgar suspeição de Moro depois	no		1561505712	BBC News Brasil	UCthbIFAxbXTTQEC7EcQvP1Q	News & Politics	65982	3635	180	0.049518569463549	0	496
t2lfdkzokkU	Copa América: REVEJA Brasil 0 x 0 Venezuela com Everaldo Marques Arnaldo Ribeiro e Antero Greco	no		1560913973	Mundo ESPN	UCQET9CZdh03jWnpY7WY25EA	Sports	35464	654	27	0.041284403669725	0	14
DN9U6lx66U0	Caixa-preta e disputa bilionária: o que está por trás da saída de Levy do BNDES	no		1560888641	BBC News Brasil	UCthbIFAxbXTTQEC7EcQvP1Q	News & Politics	58531	3744	236	0.063034188034188	0	543
jzFmY94WSkQ	Como a decisão de não vacinar seu filho afeta o grupo	no		1560950403	BBC News Brasil	UCthbIFAxbXTTQEC7EcQvP1Q	News & Politics	7756	929	31	0.033369214208827	0	147
CX34mU97u0M	Dono da Havan: Daqui a pouco estou vendendo produto do Véio da Havan	no		1561132865	BBC News Brasil	UCthbIFAxbXTTQEC7EcQvP1Q	News & Politics	37063	1810	885	0.48895027624309	0	918
8Wj_pkBuuns	Como disputa sobre Itaipu quase derrubou presidente paraguaio?	no		1564770391	BBC News Brasil	UCthbIFAxbXTTQEC7EcQvP1Q	News & Politics	60148	4872	218	0.044745484400657	0	861
SmMt2pXgnto	O MITO E O PERIGO DO MOVIMENTO ANTIVACINA | Natalia Pasternak	no		1573736942	Casa do Saber	UCtvvTFp0XANyllOdmzZr9VQ	Education	10811	1885	43	0.022811671087533	0	289
Px4okHZrn00	A trágica história do médico que descobriu que lavar as mãos salva vidas	no		1581013234	BBC News Brasil	UCthbIFAxbXTTQEC7EcQvP1Q	News & Politics	58597	7724	65	0.0084153288451579	0	476
EZZQZnKQPa8	Liberação de saques do FGTS à vista? Bolsonaro diz que sim. Entenda o que está em jogo	no		1560462377	BBC News Brasil	UCthbIFAxbXTTQEC7EcQvP1Q	News & Politics	404591	12879	371	0.02880658436214	0	822
n1xCk8T8E_M	Bolsonaro chega ao G20 e rebate fala de Merkel: ‘Temos muito a ensinar à Alemanha’	no		1561629674	BBC News Brasil	UCthbIFAxbXTTQEC7EcQvP1Q	News & Politics	129771	3753	434	0.11564082067679	0	2342
Be1fc6ao4mg	Amazônia vem do grego? A curiosa origem de 5 palavras gregas no português	no		1562101596	BBC News Brasil	UCthbIFAxbXTTQEC7EcQvP1Q	News & Politics	126820	13433	115	0.0085610064765875	0	758
jwGQV1afA0I	Da cocaína ao acordo histórico do Mercosul: os “baixos e altos” da semana do Brasil no mundo	no		1561812954	BBC News Brasil	UCthbIFAxbXTTQEC7EcQvP1Q	News & Politics	28239	2982	238	0.07981220657277	0	521
X-UneV6TBGE	Antivacina | Projeto Meme	no		1534899600	Canal Futura	UC2mmP8ysfyko40KSn90x6Og	Education	3716	218	13	0.059633027522936	0	17
uflBBRUJCfk	O que é mito e o que é verdade sobre o desmatamento no Brasil e na Europa	no		1566411210	BBC News Brasil	UCthbIFAxbXTTQEC7EcQvP1Q	News & Politics	150735	16058	1169	0.07279860505667	0	1815
W4qAqhB7v-o	PRIMEIRO DIA NA COREIA DO NORTE | Parte 1	no		1560432972	Mundo Sem Fim	UCOJNw9aHGRkYuIOqwU7yK-Q	Travel & Events	831763	31603	8018	0.25371009081416	0	9367
IEeVSaEXhew	Não é só Previdência! 4 grandes desafios de Bolsonaro na economia	no		1555691391	BBC News Brasil	UCthbIFAxbXTTQEC7EcQvP1Q	News & Politics	39914	4023	75	0.018642803877703	0	306
lC7pqoCH69g	Entre Trump e Xi Jinping o que o Brasil de Bolsonaro quer alcançar no G-20 do Japão	no		1561570416	BBC News Brasil	UCthbIFAxbXTTQEC7EcQvP1Q	News & Politics	24770	1811	65	0.03589177250138	0	349
hN65iYFLZtM	O impressionante alerta de Bill Gates sobre a China	no		1579939260	Daniel Lopez	UCpLR-q8rFLe_rEAXf4PRxRg	Entertainment	255649	32152	448	0.013933814381687	0	1994
dH7UpGDYNa4	A médica que desenvolveu uma vacina contra a malária: Ruth Nussenzweig	no		1571684241	Nexo Jornal	UCJVTsYjG0KLNWL6OyHx7ZGw	News & Politics	4430	679	5	0.0073637702503682	0	12
vmz-pqsev88	O QUE É O MOVIMENTO ANTIVACINA? | com Paulo Sergio	no		1571758448	Politize!	UC0NtqwtL1oLxwm3lx_Uo5Og	Education	974	129	2	0.015503875968992	0	13
nL_XfTy0fzM	As 40 Cidades Fantasmas (Abandonadas) mais Incríveis do Mundo	no		1438014189	Nightmare	UCOO3a8hkldq6zGAOxgvZndw	Entertainment	1564830	28331	724	0.025555045709647	0	852
8US7s0C9Q7I	BRASIL vs PARAGUAI - COPA AMÉRICA (AO VIVO)	no		1561692980	Gol Contra	UC52YPxBsiE7Xcf_53WYXvTQ	Sports	31400	837	77	0.091995221027479	0	10
WaNXqD_aixw	Os Pingos Nos Is - 26/06/19 - Abuso de autoridade / Moro recebe apoio / Entrevista com Kajuru	no		1561595560	Os Pingos nos Is	UCzjtGnD7qqeaHW3nvDVrjQA	News & Politics	356486	24743	569	0.022996403023077	0	606
Ti7MDeitKkQ	Jornal da Manhã - Edição completa - 26/06/19	no		1561573819	Jovem Pan News	UCP391YRAjSOdM_bwievgaZA	News & Politics	205963	6460	409	0.063312693498452	0	27
1AwCV9VTxVs	Encontro do 247 em Olinda (29.6.2019) - Parte 2	no		1561854864	TV 247	UCRuy5PigeeBuecKnwqhM4yg	News & Politics	46368	5407	224	0.041427778805252	0	99
6Q_9T1M6m5Q	E SE A FEBRE AMARELA CHEGAR NO ENEM? | DOSE DE ATUALIDADES	no		1500494347	Descomplica	UCT0JugAtGmqiYkwxFZOwAtg	Education	99511	9941	70	0.0070415451161855	0	145
9dvXrzXwlJI	Bolsonaro rebate Merkel: como meio ambiente gera tensão para o Brasil no G20	no		1561646607	BBC News Brasil	UCthbIFAxbXTTQEC7EcQvP1Q	News & Politics	233260	11612	2758	0.23751291767137	0	3256
ttzbNjMwH2g	Boa Noite 247 - Veja produz prova contra Moro	no		1561767313	TV 247	UCRuy5PigeeBuecKnwqhM4yg	News & Politics	60330	6336	273	0.043087121212121	0	201
5_WULipuPeY	Uma mensagem de Bill Gates para os Leões [PO]	no		1445279993	Lions Clubs International	UCI4mls1kw1nChubkbVeRLKw	Nonprofits & Activism	7463	70	46	0.65714285714286	0	71
Y8taeVtKtag	O que são movimentos antivacinação?	no		1536624106	Professor de Atualidades	UCg7yfJ8e1TRqyA1tSkALyzg	Education	3454	290	8	0.027586206896552	0	39
LbyYQTeOFx8	Bom dia 247 (3.7.19): Bolsonaro vaiado Moro massacrado	no		1562152221	TV 247	UCRuy5PigeeBuecKnwqhM4yg	News & Politics	94574	11760	651	0.055357142857143	0	735
OIIiNCWB-FE	Bom dia 247 (28.2.19): as bijuterias de nióbio de Bolsonaro	no		1561720497	TV 247	UCRuy5PigeeBuecKnwqhM4yg	News & Politics	67420	8207	261	0.031802120141343	0	516
6pZZnk1RXyw	TRAÍRAS NO GOVERNO BOLSONARO...	no		1562035388	CRISTALVOX	UCOzxzEu70fNClG-9nNi4Yzw	News & Politics	29895	5045	121	0.02398414271556	0	61
Kgbc_OzEIPo	URGENTE: EXPLODIU O INTERCEPT BRASIL!	no		1561829556	CRISTALVOX	UCOzxzEu70fNClG-9nNi4Yzw	News & Politics	55508	7908	283	0.035786545270612	0	274
VNClrx66LmU	ELEIÇÕES 2018 (feat. Mas Afinal Leitura Obrigahistória e Lucio Big)	no		1521089550	Canal do Pirulla	UCdGpd0gNn38UKwoncZd9rmA	News & Politics	202094	8267	463	0.056005806217491	0	919
19kezLD80NM	Live: Moro vazamentos e a crise: o que pode acontecer no Brasil. 12/06/19	no		1560339826	Marco Antonio Villa	UCVqNUy4-FTLMwMKX-krfB6A	Education	80007	8629	1365	0.15818750724302	0	1169
JwEm3ORm87k	Os 5 Milhões de caixões comprados pelo governo americano afinal para qual propósito?	no		1274201429	fboyt	UCllbSdCRAEsPGa4JpJuLZHg	Film & Animation	546375				0	134
W_61YqlGDls	BRASIL PATÉTICO E COPA AMÉRICA FIASCO	no		1561689875	1x0 Feminino	UCjSgG4M0KM0jDBgkjwFVrjg	Sports	44569	6105	351	0.057493857493857	0	961
i-GS8N-ZD4w	Aha uhu Verdevaldo não derruba Moro	no		1562526633	José Nêumanne Pinto	UCnZOYk5co0M7hA5z1ML_45g	Entertainment	193531	37657	327	0.0086836444751308	0	1862
6_BcHq2recA	Live: Previdência Moro e os vazamentos 13 06 19	no		1560426514	Marco Antonio Villa	UCVqNUy4-FTLMwMKX-krfB6A	Education	72885	7492	850	0.11345435130806	0	835
x6cGx2pArbE	Os idiotas do movimento anti-vacina crescem a cada dia	no		1495895992	Ceticismo.net	UChkPByjtZumJrJmtqkiw5Jg	People & Blogs	5227	397	62	0.15617128463476	0	164
Lz9tw4j9GIg	A Dr.Rauni Kilde fala sobre a conspiração por trás da vacina da Gripe A em entrevista	no		1374235402	Paradigma da Matrix	UCxy9I7D4Q8VSx1wunLsntOQ	News & Politics	8034	119	4	0.033613445378151	0	6
m7ctAH51DzQ	Bill Gates diz que vai reduzir 10 a 15% da população mundial através da vacinação...	no		1308689296	Paulo Almeida	UCKfap1xgEqqAhN7jtYgDsYg	Entertainment	16555	133	22	0.16541353383459	0	18
HoXOWylPeQ4	Redução da População Global O Discurso	no		1315700923	resistencianom	UCAGWqQrxEF0Jb35zDnNaLgg	News & Politics	3570	76	5	0.065789473684211	0	16
yrFwIWqjfOs	House MD. VS Antivacinas em Português	no		1531108740	Filipe Martins	UCjnw-Wmtd7O89zlFSh1O2SA	Comedy	6062	135	28	0.20740740740741	0	7
e38oeJanYYs	Sergio Moro LADRÃO e Bolsonaro TRAIDOR: DESGOVERNO!	no		1562151606	Toni Dozane Oficial	UCdsgzVdqZ9Muii2OpR3t_ww	Entertainment	81542	8204	320	0.039005363237445	0	1070
LR2ga077teI	ANTIVACINA NA CONVERSA COM BIAL | PORQUE A GLOBO QUER QUE VOCÊ SE VACINE? MOVIMENTO ANTIVACINA	no		1566012507	Americo Moura Resumindo Tudo	UC9npsqVPOTyKQK8TiVDAe2Q	Travel & Events	5013	677	43	0.063515509601182	0	159
Ceuui8Oimik	Moro (Veja e Intercept): JUSTIÇA SABIA DE TUDO!	no		1561806000	Toni Dozane Oficial	UCdsgzVdqZ9Muii2OpR3t_ww	Entertainment	56536	5917	320	0.054081460199425	0	598
jzOMiq9lB_I	Manifestação pró-Bolsonaro fracassa e historiador prevê renúncia	no		1558908224	TV 247	UCRuy5PigeeBuecKnwqhM4yg	News & Politics	409523	16265	39309	2.4167845066093	0	13083
QMNwnqSF7Ms	Coriza | Dra Ana Escobar	no		1514986680	Dra Ana Escobar	UCKtJs_zI1yzswHDWqkqHtWw	Education	41441	1308	42	0.032110091743119	0	33
WbWimhT7lxk	Campanha de Vacinação contra a Poliomielite e Sarampo (60 )	no		1533044929	Ministério da Saúde	UC12zKGLhMhDeDidoctM6BrA	Nonprofits & Activism	95427	614	115	0.18729641693811	0	46
JJCWUBtU-do	Quais Frutas o Diabético Pode Comer? | Dr. Juliano Pimentel	no		1506362161	Dr Juliano Pimentel	UCPGGSQfN8LREy6dWdk85fpw	People & Blogs	1306372	57664	1790	0.031041897891232	0	470
rlVvsODOUsM	Primeira vacina de um filhote | Importância e cuidados [Ju Almeida Pet]	no		1465249015	Ju Almeida Pet	UCDfwywWnYoB7sHPV5udsj0g	People & Blogs	329610	8436	243	0.028805120910384	0	352
hW0hhDAXdX0	O Sarampo voltou? O que você deve saber | RESUMÃO	no		1532907072	Enfermundo	UC8IbAhPglJ1OeC44A_Gtmqg	Education	7132	300	3	0.01	0	7
mjc0DfJAPH0	12 Coisas Perigosas Que Você Faz Com o Seu Cachorro Sem Nem Se Dar Conta	no		1532780123	INCRÍVEL	UCIQPHl1WKKTt9KkWyo_JNig	People & Blogs	5120231	285966	6808	0.023807026010085	0	7274
PRrzWnvwSnk	Vacinação contra sarampo e pólio será reforçada em João Pessoa	no		1531239497	TV Correio	UCJ4uxK_mo6gNoqk9cyvgWkw	News & Politics	697	5	1	0.2	0	0
Ft-GGlq4XR0	Grávidas devem tomar vacinas; saiba quais são	no		1431708624	Jornal da Alterosa	UCxbqmMsXory_zC-kNqKHUgw	News & Politics	31391	157	18	0.11464968152866	0	9
BOb2ruOe3XU	Sarampo: saiba tudo sobre essa doença	no		1531513744	Eludicar Centro Pediátrico	UC8QNlbRIeKQsbG8u_qIzowQ	People & Blogs	28399	881	35	0.039727582292849	0	29
HA85VZlvHqQ	Entenda a Síndrome do Intestino Irritável!	no		1523966729	Dr. Fernando Lemos	UChXNyp6dL_aY_3qwVgDd-EQ	People & Blogs	237290	14765	234	0.015848289874704	0
7SRVt6-geMM	Dores na Barriga! O que será?	no		1521031111	Dr. Fernando Lemos	UChXNyp6dL_aY_3qwVgDd-EQ	People & Blogs	981859	33041	878	0.02657304561	0
kj6Wc7f9Loo	Gripe na gravidez: como evitar e tratar com receitas caseiras	no		1522242007	Almanaque dos Pais	UCy7oVBYY0FGXeeJpy6ITXxQ	People & Blogs	135064	12083	143	0.011834809236117	0	443
wW99VYHtois	Dra. Mônica Valverde Viana - Febre Amarela: Vacinar ou Não? Tire suas Dúvidas!	no		1516741950	Dra Monica Valverde Viana	UCEA5mVrH3jPMmuah5qD0DUA	People & Blogs	23613	602	36	0.059800664451827	0	257
pZzENuSEo24	Banana versus Intestino: Mitos e Verdades	no		1508635569	Dr. Fernando Lemos	UChXNyp6dL_aY_3qwVgDd-EQ	People & Blogs	747463	47848	917	0.019164855375355	0
vwWfywGVj7s	Qual é a Fibra ideal? O Especialista esclarece.	no		1532537139	Dr. Fernando Lemos	UChXNyp6dL_aY_3qwVgDd-EQ	People & Blogs	198409	20215	256	0.012663863467722	0
Y8r6MPNroi4	PRIMEIROS SINTOMAS DE GRAVIDEZ (EITAAA) - Dr Bruno Jacob	no		1529443801	GINECO SINCERO	UCtgFbv9VEh7IOw3vxMAP43A	People & Blogs	2118004	78614	2149	0.027336097896049	0	9197
5tKdwyeU_so	Mito ou verdade: bebida alcoólica corta efeito de medicamento?	no		1440172545	Sinal Verde Caxias	UC2P4D6uHis-ENplUEPyK4tA	News & Politics	28008	146	21	0.14383561643836	0	8
WZlI0htOB1c	Acabe com o BOLO na GARGANTA!	no		1530834162	Canal do Mau Hálito	UCJZOLak0v_pR6AjYsbyAoog	Science & Technology	656026	33783	712	0.021075688955984	0	1858
_nC7fObHQFU	Por que eu uso Probióticos diariamente?	no		1522083148	Dr. Fernando Lemos	UChXNyp6dL_aY_3qwVgDd-EQ	People & Blogs	338484	27364	321	0.011730741119719	0
jxiVxj4ldTs	[AO VIVO] EDIÇÃO ESPECIAL CHUVAS BORA SP e BRASIL URGENTE - 10/02/2020	no		1581342183	Band Jornalismo	UCoa-D_VfMkFrCYodrOC9-mA	News & Politics	18878	1770	75	0.042372881355932	0	0
ZSF3boyvYwo	Epidemia do coronavírus ameaça a economia global	no		1581344212	Band Jornalismo	UCoa-D_VfMkFrCYodrOC9-mA	News & Politics	220	26	1	0.038461538461538	0	4
6RoijyfUacA	Volta do sarampo caxumba e febre amarela assustam brasileiros	no		1521432449	Domingo Espetacular	UCP-Vg2PcmLiWpEdvMI1R35w	Entertainment	7061	162	7	0.04320987654321	0	37
c--YbazXmww	Francês é atacado ao caminhar em Copacabana	no		1581351855	Band Jornalismo	UCoa-D_VfMkFrCYodrOC9-mA	News & Politics	226	23	1	0.043478260869565	0	4
X3MvVSgE6ck	Suas Orelhas Podem Indicar sua Saúde: Não Ignore esses 8 Fatores	no		1512811259	INCRÍVEL	UCIQPHl1WKKTt9KkWyo_JNig	People & Blogs	2325225	54359	2104	0.03870564211998	0	1645
7EJ40GOwm1o	Caos em SP: chuvas travam a cidade inteira	no		1581343716	Band Jornalismo	UCoa-D_VfMkFrCYodrOC9-mA	News & Politics	6080	590	18	0.030508474576271	0	130
-4Ah3PjWKEk	Chuva em SP: deslizamento de terra causa pânico na cidade.	no		1581344463	Band Jornalismo	UCoa-D_VfMkFrCYodrOC9-mA	News & Politics	1394	96	1	0.010416666666667	0	17
gubEcorYp18	Se Você Se Deparar com Estas Árvores Fuja Rápido e Grite por Ajuda!	no		1529002802	INCRÍVEL	UCIQPHl1WKKTt9KkWyo_JNig	People & Blogs	1716401	35474	2285	0.06441337317472	0	1605
hshcfVKHL40	Transmissão ao vivo do SBT - RIO (HD 24 HORAS)	no		1581116488	SBT Rio	UCsRfBAspa72ExrsN347W2xg	Entertainment	365488	5320	304	0.057142857142857	0	0
6Sw24RkH64o	Quanto mais inteligente menos sociável ● Leandro Karnal	no		1526822383	Saber Filosófico	UCWdXgfpEIZIGzah9_yCL-Xw	Education	1836815	77326	3411	0.044111941649639	0	5092
kCwoVUwp8us	Filme sul-coreano Parasita é o grande vencedor do Oscar 2020	no		1581352851	Band Jornalismo	UCoa-D_VfMkFrCYodrOC9-mA	News & Politics	984	121	2	0.016528925619835	0	12
i68-JjrZ-mg	WebPalestra: Mudanças no Calendário Nacional de Vacinação para o ano 2018	no		1516703909	Telessaúde ES	UChFIPDFYjTFg03eWlwmQcTA	Education	17708	375	9	0.024	0	5
JU6E-29vjgU	O Mistério da Grande Pirâmide Foi Finalmente Solucionado	no		1509928891	INCRÍVEL	UCIQPHl1WKKTt9KkWyo_JNig	People & Blogs	4572846	226901	19704	0.086839634906854	0	8658
k4yOh7vIWCg	10 Alimentos Que Você Jamais Deveria Comer	no		1527773123	INCRÍVEL	UCIQPHl1WKKTt9KkWyo_JNig	People & Blogs	4640144	100479	17456	0.17372784362902	0	8222
GqWhQfgnmfw	BG - Alerta contra sarampo e poliomielite: campanha de vacinação começa em agosto - 09-07-2018	no		1531243922	Record TV Goiás	UCsdIGtyuyiW--cidQQ6KUsw	Entertainment	1986	20	0	0	0	11
06WSuF28LnM	Sarampo - Saiba por que é importante prevenir | Sua Saúde na Rede	no		1521459634	Sua Saúde na Rede	UC_er6_R1PKUCxc7QSXxIvzw	Education	17514	351	23	0.065527065527066	0
na6jsnZlZ2U	Chuvas em SP: Linha 9 da CPTM está interrompida	no		1581352795	Band Jornalismo	UCoa-D_VfMkFrCYodrOC9-mA	News & Politics	310	30	1	0.033333333333333	0	0
29BXXxAmDUg	10 alimentos venenosos que te matam pouco a pouco	no		1512493201	Fatos Desconhecidos	UCbAiIkPobUFy71zlmwVw3jw	Entertainment	3969034	120670	8681	0.071940001657413	0	6610
O9Vcssc1RIk	Teste ancestral: como funciona?	no		1581348600	Band Jornalismo	UCoa-D_VfMkFrCYodrOC9-mA	News & Politics	252	28	0	0	0	3
ygysa5MFA8Q	Veja medidas de segurança para evitar tragédias nas chuvas de SP	no		1581355535	Band Jornalismo	UCoa-D_VfMkFrCYodrOC9-mA	News & Politics	710	71	1	0.014084507042254	0	4
C1zOSN3zqUA	XUXA e CAMPANHA de VACINAÇÃO 2018 contra POLIOMIELITE e SARAMPO?!	no		1532889041	Conhecimento Bigode	UCyCZb-wsvM_VFKSbyKftgHg	Education	2131	16	1	0.0625	0	4
uKcPN0oDGvc	Desvende o boato que o Brasil está importando ovos da China	no		1530134733	Balanço Geral MG	UCqTxFR0G0ulWso4ZP8z3IJA	Entertainment	429515	7967	1008	0.12652190284925	0	2215
3XiURHILKmc	O Que Acontecerá Com o Seu Corpo Se Você Caminhar Diariamente	no		1524649173	INCRÍVEL	UCIQPHl1WKKTt9KkWyo_JNig	People & Blogs	3355804	265510	3024	0.011389401529133	0	3277
FGUC5Pq_-j0	8 dicas para reduzir dor nas injeções	no		1461602553	Aplicar Conteúdos em Saúde	UCkke64Kird1ZcZsPJEo_hYg	Education	258349	6437	193	0.029982911294081	0	210
XpEiQAXkbYY	Vacina contra o sarampo estão sendo disponibilizadas diariamente em Postos de Saúde	no		1531491192	Juruá Online	UCQGAqLdIBfVSB5qzTtT-Urg	News & Politics	1249	18	0	0	0	0
pxpPowWbFqg	CAMPANHA VACINA SARAMPO 17 07 18	no		1531860288	TVM	UCU8Y4bqcr0unUI18EcVmo4Q	Entertainment	902	12	2	0.16666666666667	0	2
xqeOS1sKDKY	Os 10 Principais Sintomas da Sarampo	no		1531370026	Brazil Heath	UCAAqC3FgQfWxu_ui-1gynzQ	People & Blogs	49669	502	62	0.12350597609562	0	30
3vTFS7LQOC8	BRASIL PERDEU a COPA 2018 muito ANTES dela começar ! (Assista e Entenda - França e Macron)	no		1531051201	DESPERTE. - Thiago Lima -	UCwQdXKdraEfNZv9b4IWFn5g	People & Blogs	977406	49965	4353	0.087120984689283	0	4516
rdU2-L_5bvc	Chuva em SP: acaba estado de alerta em algumas regiões	no		1581359631	Band Jornalismo	UCoa-D_VfMkFrCYodrOC9-mA	News & Politics	84	7	0	0	0	0
cneunFXDRoA	Comida orgânica nunca mais	no		1530975608	verdadeoculta	UCPHXtAKuUXPOwdEUzMgSD0A	News & Politics	24566	1907	43	0.02254850550603	0	174
QseqATiCqUw	Você Terá VIDA LONGA?? Basta Olhar Seu Umbigo! Descubra Como Anda Sua Saúde!	no		1527591602	Natural- Dicas Caseiras	UCjn8lktJ0qykReZ_FsPxH8w	Howto & Style	975450	28475	1861	0.065355575065847	0	316
fZTO8qxVOQw	Liberdade só até 2023: Explicando o Comercial do Itaú! Veja a Ligação com 1984 George Orwell	no		1518957870	Rômulo Maraschin	UCSyUhW3u3JazIT3VtE4nCEw	People & Blogs	1563898	64502	6063	0.093997085361694	0
cb0N0ZsZkbk	Um Olhar Sobre o Mundo | Olavo de Carvalho	no		1543950507	tvbrasil	UCSv9d0kQegylHWpP83jWSQg	Entertainment	247333	16034	1098	0.068479481102657	0	1397
MIloJPdLBy8	Vacinação - parte 01	no		1517257340	DoutorMoises	UCW3l9WndLOjhRtsg0Aa--2g	Science & Technology	27553	1039	41	0.039461020211742	0
iIEIQKh7mvs	EMBRATUR ENTRE O BRASIL | BOLSONARO E WITZEL | VERGONHA	no		1581046205	O Historiador	UC5ZXYxeWlROKbL7JziJ0bIQ	Pets & Animals	5163	1519	9	0.0059249506254115	0	85
ZNRHpR28LLk	NOTAS DO E.N.E.M PODEM ESTAR ERRADAS AFIRMA FUNCIONÁRIOS DO MEC	no		1580596200	O Historiador	UC5ZXYxeWlROKbL7JziJ0bIQ	Pets & Animals	7716	2059	12	0.0058280718795532	0	113
N5jx5KxKtko	Kim destrói professor prepotente e defensor de doutrinação	no		1495576288	MBL - Movimento Brasil Livre	UC8QAdpiEWAOg3AOCCFDCOYw	Nonprofits & Activism	2092039	99130	2489	0.025108443458085	0	6203
_ENrC9rdqL8	UM CURSO DE HISTÓRIA PARA O MBL	no		1543407301	O Historiador	UC5ZXYxeWlROKbL7JziJ0bIQ	People & Blogs	11545	2735	80	0.029250457038391	0	351
l66Wpr2sI_w	VILLA TÁ COLHENDO O QUE PLANTOU!! CONSTANTINO É CULPA DELE | ENTENDA	no		1581357611	O Historiador	UC5ZXYxeWlROKbL7JziJ0bIQ	Pets & Animals	2204	657	6	0.0091324200913242	0	35
XgBeZSCkrlE	Olavo de Carvalho sobre o que é o movimento comunista e a materialização de conceitos abstratos	no		1562870700	Peruvian Mav	UCSBSGWNP1RK74Wh7XYex_Gw	News & Politics	38492	3333	43	0.012901290129013	0	139
dVd_HE9cpco	O que é Olavo de Carvalho? O que o Meteoro não mostrou	no		1543661102	Filósofo Paulo Ghiraldelli	UCBMKrkHv07GoYb5ITLt0sYQ	News & Politics	203517	22562	2087	0.092500664834678	0	2628
WL82xOYq-yc	O MBL E O KIM KATAGUIRI PRECISAM VER ESTE VIDEO	no		1543590005	O Historiador	UC5ZXYxeWlROKbL7JziJ0bIQ	People & Blogs	38813	5842	1047	0.17921944539541	0	1075
JGn2dB-49zA	NANDO MOURA E BERNARDO KUSTER ESTÃO COM MEDO DA RESISTÊNCIA	no		1544012100	O Historiador	UC5ZXYxeWlROKbL7JziJ0bIQ	People & Blogs	28635	6246	307	0.049151456932437	0	934
pd3mX1QJG-c	URGENTE: OLAVO DE CARVALHO ADMITE EM POST QUE SÓ TEM 4ª SÉRIE	no		1543343400	O Historiador	UC5ZXYxeWlROKbL7JziJ0bIQ	People & Blogs	18058	3614	179	0.049529607083564	0	651
g75wnPWKPZk	Lúpus | Ana Luisa Calich	no		1415628013	Drauzio Varella	UC9zqTTVeClpqMQ5CLuJdWtw	Science & Technology	315043	8421	162	0.019237620235126	0	274
Y0VgXwtECvY	MamaFalhei passando vergonha no pânico!	no		1512502554	O Historiador	UC5ZXYxeWlROKbL7JziJ0bIQ	People & Blogs	3393	524	80	0.15267175572519	0	72
tiGQApB7UeY	BOLSONARO DEIXA MAGNO MALTA DE FORA DA MAMATA	no		1543684501	O Historiador	UC5ZXYxeWlROKbL7JziJ0bIQ	People & Blogs	28446	4625	122	0.026378378378378	0	701
D7vJkuBNXw8	ENSINANDO DIFERENÇA DE REPÚBLICA E DEMOCRACIA AO KIM KATAGUIRI	no		1543493701	O Historiador	UC5ZXYxeWlROKbL7JziJ0bIQ	People & Blogs	15579	3210	188	0.058566978193146	0	491
Gy3CBIOkrKY	NANDO MOURA DEFENDE CANAL RACISTA E DIZ QUE A ESQUERDA ESTÁ CENSURANDO CANAIS	no		1544368501	O Historiador	UC5ZXYxeWlROKbL7JziJ0bIQ	People & Blogs	16368	3673	176	0.047917233868772	0	478
29MJ3g5QVA0	JOVEM PAN UTILIZA JOVEM PARA MENTIR SOBRE POLITICA E BOLSONARO	no		1543840200	O Historiador	UC5ZXYxeWlROKbL7JziJ0bIQ	People & Blogs	53503	7055	4097	0.58072289156627	0	2622
msOv_j3Gi80	OLAVO DE CARVALHO É UM ASTRÓLOGO IDIOTA? SIM! PROVANDO PARA O NANDO MOURA	no		1543888575	O Historiador	UC5ZXYxeWlROKbL7JziJ0bIQ	People & Blogs	8857	1352	89	0.065828402366864	0	150
KvedFQHQK48	ERRAMOS AO TOLERARMOS OS INTOLERANTES (DESABAFO SINCERO)	no		1543784400	O Historiador	UC5ZXYxeWlROKbL7JziJ0bIQ	People & Blogs	11092	2695	94	0.034879406307978	0	407
jFguOlMdPv0	Boa noticia sobre o Câncer | Dr. Lair Ribeiro	no		1549891922	Jolivi Saúde	UCzDQaYfHMJrXfw46whk6hIg	Education	18981	655	14	0.021374045801527	0	12
RMx11vOz3lM	OLAVO DE CARVALHO X LOBÃO: PROVE QUE A TERRA É PLANA!	no		1559825140	Henry Bugalho	UCC6f63SXY0CDpsPGDBtTWVg	News & Politics	80993	8873	1077	0.12137946579511	0	1587
TvZRSiY3H9I	OLAVO DE CARVALHO DIZ NÃO EXISTE INTELECTUAL DE ESQUERDA DO MEU NIVEL	no		1543515300	O Historiador	UC5ZXYxeWlROKbL7JziJ0bIQ	People & Blogs	10778	2343	101	0.04310712761417	0	486
cZj_uqySxLc	PORTA DOS FUNDOS RIDICULARIZA NANDO MOURA E OLAVO DE CARVALHO	no		1543610701	O Historiador	UC5ZXYxeWlROKbL7JziJ0bIQ	People & Blogs	14183	3020	107	0.035430463576159	0	369
6hDvI8P6J9Y	Ministro general Santos Cruz afirma que Olavo de Carvalho é desequilibrado	no		1553550819	Jovem Pan - 3 em 1	UCEsbaUdrM_87K-2um30hf8Q	News & Politics	120138	3503	814	0.23237225235512	0	1201
JAagpiCnFJA	HENRY BUGALHO X OLAVO DE CARVALHO QUAL O FORMATO DA TERRA	no		1560232274	Olavo de Carvalho	UC6RQhzm93SterWntL7GzqYQ	Comedy	84118	9118	1083	0.11877604737881	0	2340
BND8DT_1qjs	CAIO COPPOLLA E FELIPE MOURA BRASIL | A VERGONHA ALHEIA NA JOVEM PAN	no		1548594900	O Historiador	UC5ZXYxeWlROKbL7JziJ0bIQ	People & Blogs	59181	7872	5635	0.71582825203252	0	3061
kwTSFOYjpWE	URGENTE: DIAS TOFFOLI DERRUBA DECISÃO QUE SOLTAVA LULA	no		1545261432	Terça Livre TV	UC7qK1TCeLAr8qOeclO-s39g	News & Politics	39666	5635	42	0.0074534161490683	0	349
XAFyLS1QHok	A QUEDA DA DIREITA NO YOUTUBE	no		1556939985	LiloVLOG	UC9sV0ieuVY2_K4LucZf4yow	People & Blogs	96610	21578	232	0.010751691537677	0	1459
b_p-4yeinGg	JÁ COMEÇOU A MAMATA NANDO?!	no		1546713676	Henry Bugalho	UCC6f63SXY0CDpsPGDBtTWVg	News & Politics	139544	23774	2565	0.10789097333221	0	2276
WOd2nrEUQOg	A LOUCURA DE ADÉLIO E A GENIALIDADE DE BOLSONARO	no		1552042808	Daniel Lopez	UCpLR-q8rFLe_rEAXf4PRxRg	Entertainment	238695	48590	344	0.0070796460176991	0	2985
8637VSSsn5c	A RESISTÊNCIA RACHOU?| MINHAS SINCERAS DESCULPAS A JOICE HASSELMANN	no		1545605862	O Historiador	UC5ZXYxeWlROKbL7JziJ0bIQ	People & Blogs	44912	6817	320	0.046941469854775	0	1207
s7WMXGIWU_w	A NOVA ESQUERDA SE LEVANTA	no		1544709683	Terça Livre TV	UC7qK1TCeLAr8qOeclO-s39g	News & Politics	56937	9710	116	0.011946446961895	0	615
07MjhBjb5aA	GUAIDÓ ARREGOU!	no		1551351600	Daniel Lopez	UCpLR-q8rFLe_rEAXf4PRxRg	Entertainment	103076	18134	181	0.0099812506893129	0	987
b4542x2sEH0	URGENTE: NANDO MOURA COMUNICA QUE VAI DEIXAR O YOUTUBE	no		1556989204	O Historiador	UC5ZXYxeWlROKbL7JziJ0bIQ	People & Blogs	30353	6278	183	0.029149410640331	0	822
pvlaW0qVWp0	032 - Refutando e detonando Drauzio Varella	no		1511264274	Daniel Mota	UCqAjL4g0-FJ4-aocsfQZkZg	Education	254322	13838	924	0.066772655007949	0	1103
JRSHbAIZCz0	Epidemias No Brasil - Para Ajudar Na Redação Do ENEM	no		1471969920	Cátia Santos	UCVUF80k8eY8T5-18TPL9xDA	Education	15829	744	11	0.014784946236559	0	30
gaGNoZLG6xA	As maiores pérolas de Olavo de Carvalho. O pseudo filósofo que os bolsominions acham inteligente #2	no		1543078331	Tony Devito	UCyyD0uZzrvjF4GKsmFBuUOg	People & Blogs	9703	777	119	0.15315315315315	0	136
r7QMdUpsJYk	A ESTUPIDEZ HUMANA NÃO TEM LIMITE │ BOLSONARO OLAVO DE CARVALHO E NANDO MOURA │ HENRY BUGALHO	no		1539639663	Henry Bugalho	UCC6f63SXY0CDpsPGDBtTWVg	News & Politics	76003	9816	2850	0.29034229828851	0	2237
9CgSNudB_xM	Nando Moura NÃO CONSEGUE responder Normose e Pc Siqueira!!!	no		1544905925	Samuel Borelli	UC3gQ9lIiPQj7frT5CE5QyRA	People & Blogs	97181	12306	1459	0.11856005200715	0	1485
pT2scj9CrRY	OLAVO DE CARVALHO O TERRAPLANISTA?!	no		1559247655	Henry Bugalho	UCC6f63SXY0CDpsPGDBtTWVg	News & Politics	102641	9856	1702	0.17268668831169	0	1748
0RMCCTziPgU	Em busca de segurança na República Centro-Africana I 360º	no		1543948986	MSFBrasil	UCyG6SY3s8fS7ZKje6lv1JKg	Nonprofits & Activism	19287	34	3	0.088235294117647	0	2
787FkMbrZQs	ÁUDIO VAZADO CONFIRMA QUE GRANDE MÍDIA QUER ARRUINAR BOLSONARO?	no		1552390824	Daniel Lopez	UCpLR-q8rFLe_rEAXf4PRxRg	Entertainment	145783	28320	266	0.0093926553672316	0	2354
CaGMP1rYWec	OLAVO DE CARVALHO x Paulo Ghiraldelli	no		1545320914	Italo Goulart	UC2m7CnTMT-AMH5w2IgBURnA	People & Blogs	18218	1702	511	0.30023501762632	0	622
jPf51l-DIRY	Família Bolsonaro cria nova encrenca. Jornalista fala sobre tratando contra câncer em Bolsonaro.	no		1550158678	Aquias Santarem - CRITICA BRASIL	UC96qopSyu7Ga75jW3HEO88w	News & Politics	41210	4483	206	0.045951371849208	0	374
svc24DI4OpI	Mensagem ao Olavo de Carvalho sobre a Terra Plana (Água Plana)	no		1559827695	ENZUH	UC9HT4JrbO6TSfjDHTzFgbPQ	News & Politics	30676	3873	588	0.15182029434547	0	548
rZnWFQLwm34	DCM entrevista Sabrina Fernandes do canal Tese Onze	no		1545352914	Diário do Centro do Mundo	UCV2kagEmsbrO5lc6glH-8jA	News & Politics	14477	915	95	0.10382513661202	0	160
GeQm5lVyOZ4	Paulo Kogos responde Debora G Barbosa: Terra plana e suas superstições gnósticas	no		1564355700	Libertarianismo	UCYmHuI1yrP_pkSsJlQRCi1g	People & Blogs	20953	1180	1092	0.92542372881356	0	1227
MBeRndOYyfc	Decisão de Toffoli mostra que Lula tinha razão: há covardes no STF	no		1545308797	Diário do Centro do Mundo	UCV2kagEmsbrO5lc6glH-8jA	News & Politics	6390	1084	72	0.066420664206642	0	125
b7dhVUVs8Ag	Terra plana 1 - Heliocentrismo o maior engano da humanidade	no		1466890904	MrRone43	UC-l4Sv-gy98g_NBasXEEcGg	Nonprofits & Activism	597133	14708	5463	0.37143051400598	0	5810
1skyDepBVgU	A Farsa das Vacinas - Parte 1	no		1438346978	Psycho Mantis	UC5nLISkLI9zsaMHp4YBYTFw	News & Politics	1214	25	4	0.16	0	9
amwFWGMJhUw	Revolta da Vacina	no		1438630168	VideoSaúde Distribuidora da Fiocruz	UC5z5hsnZOZJH8vFacP-9poQ	Science & Technology	42829	563	22	0.039076376554174	0	17
CmeIvUpdX48	MMR Vaccine and Autism - The Children s Hospital of Philadelphia (7 of 10)	no		1258396475	The Children s Hospital of Philadelphia	UCCdnN4v9Fia0pjUzYlUBsGg	Science & Technology	10977				0
0z2XzdqAMVQ	Qual o perigo das vacinas? | Ponto em Comum Doc	no		1534860000	Ponto em Comum	UCGo3vjM2Ll3XujL-zYT5SMg	Education	40927	5620	59	0.010498220640569	0	403
jR-fkIlYog8	BrainScratch: Are Holistic Doctors Being Killed?	no		1458917327	LordanARTS	UCWoe_w-oadmQxcXZV2KMZgg	People & Blogs	26081	730	27	0.036986301369863	0	289
IHDFTxQt3yk	Caminhos da Vacina | Documentário	no		1444741592	MSFBrasil	UCyG6SY3s8fS7ZKje6lv1JKg	Nonprofits & Activism	8431				0
bDKZFR6gR4I	O Livro dos Médiuns #03: Introdução 2ª parte (por André Sobreiro)	no		1581129252	RAETV	UCKsGFyhL7_fDCEYN5jDYhew	Nonprofits & Activism	2878	333	10	0.03003003003003	0	6
pr1y7ddJfvc	Meu filho e autista...Minha experiencia como mae	no		1508334907	Hope In Jesus	UCHbGJ36_GFxqzZbWxqAn0zQ	People & Blogs	6527	192	6	0.03125	0	12
wn6eZ_kuFck	Maria Valtorta -146 - Profecia de Virgilio	no		1574170573	Andre Chilano	UC-v1PJRoid6DGFzY1jVU3hg	People & Blogs	661	68	1	0.014705882352941	0	2
QPOCOylpqxM	Maria Valtorta - 152 - Vontade de Deus	no		1581336338	Andre Chilano	UC-v1PJRoid6DGFzY1jVU3hg	Nonprofits & Activism	117	25	0	0	0	7
0EYuH2mjBNw	Maria Valtorta - 148 - Figuras da Alma	no		1575284842	Andre Chilano	UC-v1PJRoid6DGFzY1jVU3hg	Nonprofits & Activism	578	64	1	0.015625	0	4
j5IuwVsn3yc	Lua e Monte Fuji com a camera Nikon P1000	no		1576330874	Andre Chilano	UC-v1PJRoid6DGFzY1jVU3hg	People & Blogs	342	44	0	0	0	4
tpqhcuHY3VQ	Maria Valtorta - 150 - Chegada de Pedro	no		1575967435	Andre Chilano	UC-v1PJRoid6DGFzY1jVU3hg	Nonprofits & Activism	651	74	0	0	0	12
fbwQjFjDJUo	Vim Trazer Perdão	no		1579571958	Andre Chilano	UC-v1PJRoid6DGFzY1jVU3hg	People & Blogs	269	41	1	0.024390243902439	0	9
S-YJL3xJRfQ	Cruz de Krizevac	no		1579775243	Andre Chilano	UC-v1PJRoid6DGFzY1jVU3hg	Nonprofits & Activism	313	43	2	0.046511627906977	0	6
h90SpDvJt-8	Maria Valtorta - 147 - Erros do Mundo	no		1574476773	Andre Chilano	UC-v1PJRoid6DGFzY1jVU3hg	People & Blogs	598	72	0	0	0	6
b7-b4b2qL3A	Maria Valtorta -151- Encontro em Tiberíades	no		1581065767	Andre Chilano	UC-v1PJRoid6DGFzY1jVU3hg	Nonprofits & Activism	236	41	0	0	0	10
NLUJfjzLyX4	Chegada de Maria	no		1578478572	Andre Chilano	UC-v1PJRoid6DGFzY1jVU3hg	Nonprofits & Activism	446	55	3	0.054545454545455	0	12
VJqY2WYXQB4	[ VACINAS ] QUER SABER MAIS VEJA ESSE VÍDEO	no		1519320186	Em Busca da Verdade	UCKFKv33ofAtflmz0C-TKnQA	News & Politics	316	28	1	0.035714285714286	0	1
fo5aIKQQq9I	Desligai-vos	no		1579853471	Andre Chilano	UC-v1PJRoid6DGFzY1jVU3hg	Nonprofits & Activism	242	34	2	0.058823529411765	0	0
JjZAvRXOPx0	#66º de 777 ✅ A todas as #lésbicas: #VIDALOKA! Todos nós somos BI? O Delta: #Homo #Hetero e #Pan!	no		1581132503	AKEL ESCOLA de Jesus Cristo & Universidade EX	UCxG1mll0wS-Q_ZvQ8rJuqag	News & Politics	15526	1121	73	0.065120428189117	0	98
glu_Z_w2hLg	Kelly - filme em portugues	no		1462666933	Joy Arthur	UC9coa4eWvwznczn6P-RXLwQ	People & Blogs	7337	31	10	0.32258064516129	0	0
9xjyddfMR5Q	Family points to Gardasil vaccination after daughter s health decline	no		1469055296	WJBF	UCbHRDtYcy75lsoRdZ2h_24A	News & Politics	32093				0	189
8kAzfN-JRGA	Sonya Pemberton - Jabbed: Love Fear and Vaccines	no		1371533689	ConvergenceScienceNetwork	UCHvDONQK4hL1_7sgIMg0iPQ	Science & Technology	9151	32	8	0.25	0	24
QVoO6uGNQ5Q	UFLA forma 590 profissionais em novo Espaço Multiuso	no		1581108650	UFLA	UCz54U1Ts7JR7ZtSiClcVOOw	Education	163	26	0	0	0	0
X8rYlTiwowc	Ginecologista fala sobre o citomegalovírus e outros temas; confira	no		1543945592	Ver Mais Londrina	UCGfBE94turq_hyKMxB-Dfrg	People & Blogs	14444	218	14	0.064220183486239	0
CsP_CrHzx6I	O que é coqueluche e quais seus sintomas? | Momento Papo de Mãe	no		1531303204	Papo de Mãe TV Cultura	UCQdOZmbeT9UoQy8G3zeNE-g	Entertainment	14331	295	10	0.033898305084746	0
dyDmsHW4iVE	Vacinação contra sarampo e paralisia infantil continua até 31 de Agosto	no		1534982323	TV Canção Nova	UCVrKQMmA2ew9LFzeIDaOFgw	Entertainment	14780	153	9	0.058823529411765	0	0
Z6fZVn-Nbd8	Vacinação contra Sarampo é prioridade para jovens de 15 a 29 anos	no		1562099387	UNINOVE	UCm17GAihi4NAVEnA1n4WajQ	Education	7092	100	13	0.13	0	0
qSO9W_n8LJw	PANCREATITE AGUDA: QUANDO SUSPEITAR DOS SINTOMAS?	no		1546434007	DOUTOR AJUDA	UC1Nm7gQCcGvgLyVcGTXp-Ww	Education	15816	1214	14	0.011532125205931	0	47
hkX12U8ULco	TUDO SOBRE CATAPORA E SEUS SINTOMAS | MACETES DE MÃE	no		1537538410	Macetes de Mãe	UCTrx5uG9vJjTLloAH8hE-pg	People & Blogs	120332	3055	125	0.040916530278232	0	206
5U9XSnGycD0	TOMEI A VACINA DA FEBRE AMARELA GRÁVIDA	no		1529505408	clica que é dica	UCh897BiM_CQJtK2gL29tYSg	People & Blogs	2737	164	0	0	0	30
sseyQLmtIS4	Quais são os cuidados com a rinite na gestação? | Momento Papo de Mãe	no		1544173206	Papo de Mãe TV Cultura	UCQdOZmbeT9UoQy8G3zeNE-g	Entertainment	5662	177	4	0.022598870056497	0
Hp9M8uAibPk	Sarampo: Vacinação para bebês a partir de 6 meses começa nesta quinta	no		1566469193	Jovem Pan News	UCP391YRAjSOdM_bwievgaZA	News & Politics	5977	51	8	0.15686274509804	0	2
HQ1PZWibhMw	Reforço na vacinação contra Sarampo continua e chega ao Centro	no		1521757774	Band Amazonas	UCi0ftpk_k9UhC2oNrnxatNA	News & Politics	537	4	0	0	0	0
WVZQD2bNBKE	Comentário de Ricardo Boechat sobre a vacinação contra sarampo e pólio	no		1535759035	Band Jornalismo	UCoa-D_VfMkFrCYodrOC9-mA	News & Politics	2313				0	12
vcus2G2H5To	Debate sobre o aumento dos casos de sarampo	no		1562800319	Jornal da Gazeta	UCNl_i-ggJbZNyOLlhE7yyhw	News & Politics	2954	70	5	0.071428571428571	0	12
4a44xhw-u9g	SURTO DE SARAMPO. Veja se você precisa se vacinar	no		1563808792	Morning Show	UC-wcdrzucnlKGBjyEUaEWaQ	News & Politics	22211	814	152	0.18673218673219	0	330
tMtyCdNGLpU	Vacina Pentavalente (Penta) - Aula Completa (Profa. Juliana Mello)	no		1554401799	ENFrente Enfermagem Continuada	UCD9kk0EUEtflrRl6TV0lDyA	Education	4851	390	1	0.0025641025641026	0	10
YgouSdI-Mbk	Heteroidentificação	no		1580480505	UFLA	UCz54U1Ts7JR7ZtSiClcVOOw	Education	283	12	0	0	0	0
ImEvMtfAh4c	Doenças exantemáticas | UniCEUB	no		1560307732	MEDICINA COMPLETA	UCqvGEQ2q-gScRQpl158SAfQ	People & Blogs	2560	109	5	0.045871559633028	0	5
VkZOlg8_4UY	O Que é Flebite e como identificar ?	no		1555246814	Blog Experiências de um Técnico de Enfermagem	UCsGzj2UYih1rr91iuFVPKiQ	Education	15601	891	8	0.0089786756453423	0	55
NTY1WZcPv4Q	✅ O que é infecção no sangue como identificar e tratar!	no		1567807200	Naturais - Cura Natural	UCooHPZW1y9nswIiZuA0EORw	People & Blogs	6617	267	6	0.02247191011236	0	2
vyPEMomBaaA	Sarampo na Gravidez	no		1532018396	Conseils de famille	UCdWWan__ZRGzfVZ81nfE3KA	People & Blogs	600	0	7		0	0
f8_gxJ7me2E	NA MINHA CASA NINGUÉM COME PÃO!!! E Como Se Alimentar Corretamente!!! (Lair Ribeiro)	no		1511613609	SAÚDE & BEM ESTAR	UCe1XNXkGImWSq5n4wkzNjBw	People & Blogs	1027430	52495	1027	0.019563767977903	0	1322
K9v0sKgYINs	QUAIS SÂO OS PRINCIPAIS SINTOMAS DA FEBRE AMARELA?	no		1517492584	Dr. Lair Ribeiro Oficial	UCk9mgpQVdJ5oKQWkM1UPBaQ	Entertainment	22155	637	19	0.029827315541601	0	24
WE5f1ZbmCz4	Daniel Mastral - Satanismo Oculto	no		1552595501	Daniel Mastral	UCcyrEfqNzo1AWnC_PPA4rzw	Education	133632	9596	157	0.016360983743226	0	14
zf9AiO6KhCM	O alimento que blinda a sua próstata	no		1543852228	Dr. Lair Ribeiro Oficial	UCk9mgpQVdJ5oKQWkM1UPBaQ	Entertainment	3231683	113269	3332	0.029416698302272	0	2991
bJRzf-ks5WU	🔴 Dr. Lair Ribeiro tema - Quem nasceu POBRE pode ficar RICO ? O que é alto estima ?	no		1470132928	prosperidadeshop	UCol52xtoFqjdeW2t-JvLkeQ	Education	228945	12137	217	0.017879212325945	0	367
JaMDUQyG0as	DEVO OU NÃO ME VACINAR CONTRA GRIPE? (Tiago Rocha)	no		1493939645	Palestrante Tiago Rocha	UCfMqB9cB9RfC1r2CMPnYDNw	People & Blogs	154111	9528	209	0.021935348446683	0	491
v6DWGPNjNIg	Mude Sua Alimentação Mude Sua Vida | Hangout com Dr. Lair Ribeiro	no		1441060923	Dr. Lair Ribeiro Oficial	UCk9mgpQVdJ5oKQWkM1UPBaQ	Education	768508	23321	866	0.037133913640067	0	895
oQDzqTQAIJk	ÁGUA ALCALINA Aprenda a Fazer Com o Sal Marinho!!! (Lair Ribeiro)	no		1484165234	SAÚDE & BEM ESTAR	UCe1XNXkGImWSq5n4wkzNjBw	People & Blogs	1518902	52631	1525	0.028975318728506	0	1289
nj7o3hgAvLg	CAUSAS DAS MANCHAS DE PELE Saiba Como ELIMINÁ-LAS!!! Vitamina D3 e o Sabonete (Lair Ribeiro)	no		1484497470	SAÚDE & BEM ESTAR	UCe1XNXkGImWSq5n4wkzNjBw	People & Blogs	878298	29032	644	0.022182419399284	0	848
Oilh5XR8ygA	OS 7 MELHORES ALIMENTOS DO MUNDO!!! (Lair Ribeiro)	no		1481389692	SAÚDE & BEM ESTAR	UCe1XNXkGImWSq5n4wkzNjBw	People & Blogs	305117	16929	235	0.013881505109575	0	284
yLA47iqQU2E	TESTOSTERONA!!! Saiba Os Seus Benefícios!!! (Lair Ribeiro)	no		1504356812	SAÚDE & BEM ESTAR	UCe1XNXkGImWSq5n4wkzNjBw	People & Blogs	216253	7310	199	0.027222982216142	0	175
3gSsIAOeIqE	🔴 COMA CARBOIDRATOS SEM ABSORVER!!! Saiba Como Nesse Vídeo!!! Dr. Lair Ribeiro E A Dieta Cetogênica	no		1566048069	SAÚDE & BEM ESTAR	UCe1XNXkGImWSq5n4wkzNjBw	People & Blogs	287755	20300	235	0.011576354679803	0	474
EKkWEuD5m_I	ABACATE	no		1572523777	Dr. Lair Ribeiro Oficial	UCk9mgpQVdJ5oKQWkM1UPBaQ	Entertainment	40064	4091	16	0.0039110241994622	0	72
IbRFprrRmXg	🔴 AÇÚCAR MASCAVO E AMENDOIM Brasileiros Estão Contaminados??? Dr. Lair Ribeiro E O Detox Eficiente!	no		1561208634	SAÚDE & BEM ESTAR	UCe1XNXkGImWSq5n4wkzNjBw	People & Blogs	55220	3864	48	0.012422360248447	0	185
Jnpq79oLquw	POSSO TOMAR VIINHO TINTO	no		1575398506	Dr. Lair Ribeiro Oficial	UCk9mgpQVdJ5oKQWkM1UPBaQ	Entertainment	34811	3888	28	0.007201646090535	0	227
lMGjkkt6JL0	COMO ATINGIR UM SONO REPARADOR?	no		1581092101	Dr. Lair Ribeiro Oficial	UCk9mgpQVdJ5oKQWkM1UPBaQ	Entertainment	5596	735	4	0.0054421768707483	0	0
5rWaCLTWJwE	ONDE ENCONTRAR AS RESPOSTAS?	no		1574779433	Dr. Lair Ribeiro Oficial	UCk9mgpQVdJ5oKQWkM1UPBaQ	Entertainment	10437	1632	6	0.0036764705882353	0	41
-VCx5bThG2M	QUALÉ O MELHOR DOS ÓLEOS PARA COZINHAR?	no		1578405537	Dr. Lair Ribeiro Oficial	UCk9mgpQVdJ5oKQWkM1UPBaQ	Entertainment	30975	2949	20	0.0067819599864361	0	1
5OwdM6q22JA	🔴 Porque NÃO Devemos Usar AZEITE DE OLIVA Brasileiro? E A Pílula Da Inteligência! Dr. Lair Ribeiro	no		1563627972	SAÚDE & BEM ESTAR	UCe1XNXkGImWSq5n4wkzNjBw	People & Blogs	44552	3674	51	0.013881328252586	0	186
4lWjrOEp6FA	Super Vacina Natural Contra a Gripe Dr Lair Ribeiro	no		1535494305	O Melhor Para Você	UCVPdtCCsEsem4hyVwS_GzOQ	People & Blogs	164691	11400	119	0.010438596491228	0	272
daKxfWOjz7M	MINHA AULA DEFINITIVA SOBRE O ÓLEO DE COCO	no		1536246485	Dr. Lair Ribeiro Oficial	UCk9mgpQVdJ5oKQWkM1UPBaQ	Entertainment	420500	33730	370	0.01096946338571	0	1711
2t11sQtmesY	COMO TER INTESTINO SAUDÁVEL!!! LAIR RIBEIRO RESPONDE!!! #DrLairRibeiro	no		1515236155	SAÚDE & BEM ESTAR	UCe1XNXkGImWSq5n4wkzNjBw	People & Blogs	780205	30234	807	0.026691803929351	0	619
VItTyNMP_xg	Diabetes e Obesidade | Hangout com Dr. Lair Ribeiro	no		1459440879	Dr. Lair Ribeiro Oficial	UCk9mgpQVdJ5oKQWkM1UPBaQ	Education	507116	12011	447	0.037215885438348	0	555
CgLG-SsQUUM	TRATAR DEPRESSÃO SEM REMÉDIOS (EMT) - ALZHEIMER E AMNÉSIA | Dr Lair Ribeiro	no		1568746705	Junior Hallak Medicina e Saúde	UCPR3gVNYBzi-02_O4noC1Zg	Science & Technology	58991	5388	55	0.010207869339272	0	178
nq214q1RusY	Lair ribeiro Vitamina D3 A Vacina Contra O Cancer	no		1420297019	Cizio Oliveira	UCB64lmy3pK38sjYIVjiZN8A	People & Blogs	30048	994	11	0.011066398390342	0	33
1ecPR4UjOXc	DORMIR NO ESCURO FAZ DIFERENÇA?	no		1576975843	Dr. Lair Ribeiro Oficial	UCk9mgpQVdJ5oKQWkM1UPBaQ	Entertainment	25991	3739	18	0.0048141214228403	0	149
YPzn-prP7go	3 Alimentos que você não deve comer de jeito nenhum! Nunca! | Dr. Marco Menelau Live #5	no		1571959097	Dr. Marco Menelau	UCGbDaS58FGh45Oq4N-Qfhdw	Science & Technology	43005	6124	81	0.013226649248857	0	222
ZrreJeV_-HQ	Saiba quem não deve tomar a vacina contra febre amarela	no		1516364816	SP no Ar	UCQKBmUf2GZUXRQFpzCPN5og	News & Politics	76973	590	64	0.10847457627119	0	111
BirgLRWaXic	Devo tomar a vacina de gripe?	no		1365448504	Jovem Pan News	UCP391YRAjSOdM_bwievgaZA	News & Politics	43054	613	190	0.30995106035889	0	274
imGy8-Iowf8	10 motivos para você tomar Ômega 3	no		1507298303	Dr. Lair Ribeiro Oficial	UCk9mgpQVdJ5oKQWkM1UPBaQ	Entertainment	293414	9106	187	0.020535910388755	0	454
16AslDPO9Mk	🔴 Essa Planta PODEROSA FARÁ VOCÊ VIVER MAIS!!! E O Melhor Café Para Saúde!!! Dr. Lair Ribeiro	no		1564237484	SAÚDE & BEM ESTAR	UCe1XNXkGImWSq5n4wkzNjBw	People & Blogs	98288	6685	90	0.013462976813762	0	166
Euz_ue1S3Bk	O PODER DA EPIGENÉTICA	no		1578685725	Dr. Lair Ribeiro Oficial	UCk9mgpQVdJ5oKQWkM1UPBaQ	Entertainment	16500	2196	17	0.0077413479052823	0	0
EcsGxI3Tv_I	Fazer AMOR ao acordar faz bem? O Hormônio da fidelidade. Vc é Maluco beleza? | Dr Lair Ribeiro	no		1554172844	U MIÓ QUE TÁ TENO	UC4F32QLrpDmmRrozxr9z59g	Science & Technology	175456	15113	142	0.0093958843379872	0	1387
ncIUGXop1Mw	Entrevista com Dr. Lair Ribeiro | Saia da Rota do Infarto e do AVC	no		1523495998	Dr. Lair Ribeiro Oficial	UCk9mgpQVdJ5oKQWkM1UPBaQ	People & Blogs	40802	3681	34	0.0092366204835642	0	160
_l7bi85fIv4	Dr Lair Ribeiro dá uma verdadeira aula sobre Vitamina D3 -:De Academia Lair Ribeiro	no		1506800163	O NATURAL É MELHOR	UCwQhAc44SfDvhdCQiHluBVQ	People & Blogs	554451	44841	641	0.014294953279365	0	815
uxLKKJCFD8o	Esqueça o cálcio e saiba como prevenir a Osteoporose. (DR. LAIR RIBEIRO)	no		1537404596	nutrição Alimentos & Cia	UCQNi2fXhCHRu8-b-w29SMCA	Education	580900	44514	1051	0.023610549490048	0	1284
pNztY2hcMzc	CUIDADO Se VC está acordando sem ereção matinal | Benefícios da testosterona| Dr Lair	no		1555276292	U MIÓ QUE TÁ TENO	UC4F32QLrpDmmRrozxr9z59g	Science & Technology	367468	19388	254	0.013100887146689	0	1077
qpURpgwnVdk	COMO PAREI DE GRIPAR? ACHEI A CURA DA GRIPE!!	no		1511147387	Tati Braga	UCgrLZ1vLKak20iMSxK13C9w	People & Blogs	273592	13353	1387	0.10387178911106	0	403
F8D3xa6gBck	5G é pior do que VC pode IMAGINAR | Dr Lair Ribeiro	no		1560134150	U MIÓ QUE TÁ TENO	UC4F32QLrpDmmRrozxr9z59g	Science & Technology	947398	55143	1876	0.034020637252235	0	4669
1GVELUEQO10	Faz MAL e te ENVELHECE 7X MAIS | Dr Lair Ribeiro	no		1521497015	U MIÓ QUE TÁ TENO	UC4F32QLrpDmmRrozxr9z59g	Science & Technology	1316659	53201	1513	0.028439315050469	0	2302
QUjveRwc4dc	COMO usar ÁGUA E SAL como REMÉDIO PARA DOR | Dr Lair Ribeiro	no		1543431830	U MIÓ QUE TÁ TENO	UC4F32QLrpDmmRrozxr9z59g	Science & Technology	527277	34905	431	0.012347801174617	0	2243
KdCCbazbKAI	⚠️VEJA A VERDADE POR DETRÁS DA VACINA DA FEBRE AMARELA | Hangout Dr Lair Ribeiro.	no		1517357689	U MIÓ QUE TÁ TENO	UC4F32QLrpDmmRrozxr9z59g	Science & Technology	112039	6897	186	0.026968247063941	0	398
kwp1L3gL6CA	E quem bebe café o dia inteiro? - Remédio que pode causar Alzheimer precocemente 《Dr. Lair Ribeiro》	no		1567733551	U MIÓ QUE TÁ TENO	UC4F32QLrpDmmRrozxr9z59g	Science & Technology	466124	33064	396	0.011976772320348	0	1913
eTHXlDxqtoM	Mastigue cravo da Índia e veja o que acontece com seu metabolismo e com a sua tireóide	no		1559521664	Dr. Dayan Siebra	UClN6OLbLp1YjTSwDOkEM2dA	Entertainment	155643	24655	188	0.0076252281484486	0	1414
7i3Ww0k8VxY	Ovo voltou a ser vilão? Não acredito!! | Dr. Dayan Siebra	no		1554253496	Dr. Dayan Siebra	UClN6OLbLp1YjTSwDOkEM2dA	Entertainment	121639	22308	303	0.013582571274879	0	1328
CfhqdizHApM	Tomando vacina febre amarela. Escandalosa??!! Euuuuu??????	no		1491421826	Isabela Soares	UCrSYAKKH6gYD04KA-0ZkLAQ	Entertainment	11009780	63956	12334	0.19285133529301	0
FipJbySfGRQ	O que acontece com as pessoas que usam chá de orégano? | Dr. Dayan Siebra	no		1565657897	Dr. Dayan Siebra	UClN6OLbLp1YjTSwDOkEM2dA	Entertainment	307804	42257	372	0.0088032751970088	0	2132
Q3JTuzpHsh8	Abra o olho com Dr.Lair Ribeiro	no		1508358572	Markingguitar	UCeYMquYSGFQ6ryJQ1QWxn6w	Music	1055588	43007	4165	0.096844699700049	0	4099
SQpVUYjwRW8	A morte de Marcelo Rezende - Dr Lair Ribeiro merece respeito! Dieta cetogênica e quimioterapia	no		1505753354	O NATURAL É MELHOR	UCwQhAc44SfDvhdCQiHluBVQ	People & Blogs	857691	36245	1865	0.051455373154918	0	2525
3joN57BORlg	OS MALES CAUSADOS PELA DEFICIÊNCIA DE VITAMINA B12 | Dr Lair Ribeiro	no		1539053808	U MIÓ QUE TÁ TENO	UC4F32QLrpDmmRrozxr9z59g	Science & Technology	280200	18447	221	0.011980267794221	0	1107
LW1lfsP_JIY	Dr Lair REVELA PQ ele usa AGUÁ morna COM LIMÃO no Jantar	no		1551374758	U MIÓ QUE TÁ TENO	UC4F32QLrpDmmRrozxr9z59g	Science & Technology	1060730	65922	853	0.012939534601499	0	3847
AhQMDLstpRo	💊 O REMÉDIO QUE DEIXA BURRO E ENVELHECE O CÉREBRO EM 10 ANOS | Dr Lair Ribeiro	no		1546208885	U MIÓ QUE TÁ TENO	UC4F32QLrpDmmRrozxr9z59g	Pets & Animals	290505	15583	281	0.018032471282808	0	1061
-FayqngQ5sE	OLHA os males causados pelo óleo de coco Eu e a ABRAM estamos errados? Fernando Lemos x Dr Lair	no		1548786850	U MIÓ QUE TÁ TENO	UC4F32QLrpDmmRrozxr9z59g	Science & Technology	232851	13170	710	0.053910402429765	0	4807
s3Z0Y9Nx84g	Comentários Idiotas #15 - Dr. Drauzio Varella	no		1487967328	Argumentos Veganos	UCLJM5tW9y0KpbKo-F7-kGEQ	Nonprofits & Activism	258983	6537	2215	0.33884044668808	0	1357
30-WnTKAY1o	Autismo - Coaching Parental Parte 2 - Prática no Dia-a-Dia	no		1533218401	Mayra Gaiato	UC42k7FI53tnSSIjgzW-rbLA	Education	21771	1908	14	0.0073375262054507	0	61
yV-jjsU9EAQ	O Sol está Mudando de Forma e não Sabemos o Porquê | AstroPocket News	no		1532741711	Canal do Schwarza	UCWq1xltHB2fDe6YkYoOrryg	Entertainment	55228	8809	80	0.0090816210693609	0	237
tOhQGHoCUQE	O Brasil Está Fadado ao FRACASSO | Fora da Caixa	no		1533319366	Canal do Schwarza	UCWq1xltHB2fDe6YkYoOrryg	Entertainment	37223	8653	81	0.009360915289495	0	863
O9TsDPP-7os	Finalmente descobriram o VERDADEIRO PROPÓSITO das pirâmides do Egito?	no		1533243601	Mundo Desconhecido	UChsb03kH_dNRh2-wE8GkeaA	Entertainment	2411945	82935	3699	0.044601193705914	0	2866
_1ni1LdLNNI	Misterioso Planeta Solitário é Detectado Além do Sistema Solar | AstroPocket News	no		1533340269	Canal do Schwarza	UCWq1xltHB2fDe6YkYoOrryg	Entertainment	62314	9868	67	0.0067896230239157	0	683
RQ9oa42XUc0	A Verdadeira Razão de Existirem Canhotos (E não Tem a Ver com o Cérebro) | AstroPocket	no		1532984405	Canal do Schwarza	UCWq1xltHB2fDe6YkYoOrryg	Entertainment	86351	12290	145	0.01179820992677	0	1157
qiXkOaEk2n8	Veja um Vídeo Incrível em Time-Lapse de Explosão em Supernova | AstroPocket News	no		1532989501	Canal do Schwarza	UCWq1xltHB2fDe6YkYoOrryg	Entertainment	26816	4772	23	0.0048197820620285	0	72
V-GKt5NoSR8	Está Ficando IMPOSSÍVEL de Ver Estrelas no Céu	no		1533567606	Ciência Todo Dia	UCn9Erjy00mpnWeLnRqhsA1g	Science & Technology	173759	28904	122	0.0042208690838638	0	937
gVxrfKa6Gm0	Cientistas Descobrem que Pirâmide do Egito Foca Energia Eletromagnéticas | Lenda ou Fato	no		1533848401	Canal do Schwarza	UCWq1xltHB2fDe6YkYoOrryg	Entertainment	62950	9109	109	0.011966187287298	0	333
Z4BqwLexRQ4	É Possível Disparar Armas no Vácuo do Espaço? A Bala Ficaria Orbitando a Terra? | AstroPocket	no		1533077009	Canal do Schwarza	UCWq1xltHB2fDe6YkYoOrryg	Entertainment	92610	13881	167	0.012030833513436	0	458
EQf9tXmyC5A	HISTÓRICO: Lago Com Água Líquida é Encontrado em Marte! | AstroPocket News	no		1532563825	Canal do Schwarza	UCWq1xltHB2fDe6YkYoOrryg	Entertainment	76974	12226	89	0.007279568133486	0	619
54s8w7AVyj4	Por que o Espelho Inverte da Esquerda para Direita mas não Cima/Baixo? | AstroPocket	no		1533675601	Canal do Schwarza	UCWq1xltHB2fDe6YkYoOrryg	Entertainment	42981	8258	115	0.013925890046016	0	372
3QczwZLJM3s	Eram Os Deuses Astronautas? - A Vida na Terra veio de Marte? | 5 Mistérios Sem Solução	no		1463580000	Canal do Schwarza	UCWq1xltHB2fDe6YkYoOrryg	Entertainment	216356	17226	618	0.035876001393243	0	1340
E1pIOT1EfEw	Conheça a Luz Líquida: O Quinto Estado da Matéria | AstroPocket	no		1533597653	Canal do Schwarza	UCWq1xltHB2fDe6YkYoOrryg	Entertainment	104562	18290	191	0.010442864953527	0	553
uBYb3834lF0	Colisão de 2 Estrelas Resolve Mistério de Décadas | AstroPocket News	no		1533172373	Canal do Schwarza	UCWq1xltHB2fDe6YkYoOrryg	Entertainment	35259	6237	44	0.0070546737213404	0	173
TN-qI6uCidY	Radiotelescópio Capta Sinal de Radio Não Identificado Vindo do Espaço | AstroPocket News	no		1533256596	Canal do Schwarza	UCWq1xltHB2fDe6YkYoOrryg	Entertainment	55451	8534	72	0.0084368408718069	0	350
NZ2RIqu0Ais	Relógio do Juízo Final Marca 100 Segundos para o Fim do Mundo e isso não é Nada Bom	no		1580855830	Canal do Schwarza	UCWq1xltHB2fDe6YkYoOrryg	Entertainment	79531	12906	278	0.021540368820704	0	1034
SyzVO8EO2v0	Se Seu Cérebro Fosse um HD Quantos Filmes Caberiam Nele? | AstroPocket	no		1534974985	Canal do Schwarza	UCWq1xltHB2fDe6YkYoOrryg	Entertainment	69528	12640	87	0.0068829113924051	0	473
j-ojDy-GBn4	É Possível Criar Gravidade Artificial? | AstroPocket	no		1534891074	Canal do Schwarza	UCWq1xltHB2fDe6YkYoOrryg	Entertainment	51719	9411	83	0.0088194665816598	0	404
ZCK_k9HPrD0	Câmera Consegue filmar a 1 TRILHÃO de Quadros por Segundo e Registra Fenômenos Invisíveis	no		1579649141	Canal do Schwarza	UCWq1xltHB2fDe6YkYoOrryg	Entertainment	58668	8950	180	0.020111731843575	0	334
C8bzjWmEE0g	Mais de 100 mil Pessoas Viram OVNIs no Maior Avistamento dos EUA!	no		1533484800	AssombradO.com.br	UCIirjo8OWJBMLfV_peBD6RQ	Entertainment	142785	16735	194	0.011592470869435	0	838
mu8pkIvePgo	O Tempo está Desacelerando e irá PARAR Completamente um Dia diz Estudo | AstroPocket	no		1532552403	Canal do Schwarza	UCWq1xltHB2fDe6YkYoOrryg	Entertainment	66611	12190	115	0.0094339622641509	0	639
p4OBGz1OIoc	A Armadura Indestrutível | Grafeno: O Material que Pode Mudar o Mundo | AstroPocket	no		1535490007	Canal do Schwarza	UCWq1xltHB2fDe6YkYoOrryg	Entertainment	320835	30021	494	0.016455148063023	0	1225
dSU3LZA9PeA	Veja Como uma TV Funciona em Camera Ultra Lenta (380.000 Quadros por Segundo) | AstroPocket	no		1533157201	Canal do Schwarza	UCWq1xltHB2fDe6YkYoOrryg	Entertainment	220489	19141	561	0.029308813541612	0	400
CU-JInHjziA	E se a Terra Girasse 17 Vezes mais RÁPIDO? - Chuva Invertida | AstroPocket	no		1534374132	Canal do Schwarza	UCWq1xltHB2fDe6YkYoOrryg	Entertainment	58295	10048	109	0.010847929936306	0	373
b6oXhwUtd7E	Podemos ter Encontrado Evidências de Universos Anteriores ao Nosso | Fora da Caixa	no		1534542721	Canal do Schwarza	UCWq1xltHB2fDe6YkYoOrryg	Entertainment	62652	10568	101	0.009557153671461	0	494
9G-6amrvN-c	Saiba Porque TODOS os Mapas do Mundo Estão ERRADOS | AstroPocket	no		1533773999	Canal do Schwarza	UCWq1xltHB2fDe6YkYoOrryg	Entertainment	86054	16235	176	0.010840776101016	0	648
-07Td55IS_4	Como meu filho saiu do autismo moderado para o autismo leve	no		1520268981	Kenya Diehl	UCilO3ZOPdzgmccJg_NpJ5XA	People & Blogs	41445	3078	66	0.021442495126706	0	267
we_Ov9fuiUU	Autismo e Grandes Cientistas A História de Henry Cavendish	no		1444457997	Leila Maria Felix	UCBrf8ddDbkt70nWkJHlc42A	People & Blogs	390	13	0	0	0	1
UZdn-xCzgy8	O EVENTO está chegando explicando o que é p/SANANDA	no		1521045787	ESSENCIA AYAM EU SOU Espiritualidade	UCfwxLOjkmp3gSEB2KCYhOlw	Education	201828				0	450
ZNpBV8krEYM	Mitos e verdades sobre o sono	no		1353603316	Você Bonita	UCxucJ9P3mLMneYypLZYn2uw	Entertainment	10121	226	10	0.044247787610619	0	2
fOD6A7yUU5c	Urologista fala sobre mitos e verdades da próstata	no		1479174386	Record News	UCuiLR4p6wQ3xLEm15pEn1Xw	People & Blogs	808141	14535	913	0.06281389748882	0	305
7JckRJOZwLw	Ministério da Saúde atualiza situação sobre o novo coronavírus (31.01.2020 parte 2)	no		1580504495	Ministério da Saúde	UC12zKGLhMhDeDidoctM6BrA	Nonprofits & Activism	4137	150	14	0.093333333333333	0	31
ghTURKhR3H0	Câmera Escondida (18/12/16) - Consultório no Teatro	no		1482112800	Câmeras Escondidas Programa Silvio Santos	UC3d7Ix6GrtxESULE5Auj_Zg	Comedy	5634091	48497	4693	0.096768872301379	0	1835
7SjM_ZrlHkw	Segredo para ter longevidade com saúde está nos hábitos e na alimentação	no		1521432247	Domingo Espetacular	UCP-Vg2PcmLiWpEdvMI1R35w	Entertainment	563881	13114	476	0.036297087082507	0	316
5LrVsXMQPhc	Médico ortopedista vira paciente e faz tratamento com clientes que atendia	no		1465239174	Domingo Espetacular	UCP-Vg2PcmLiWpEdvMI1R35w	Entertainment	419366	7659	232	0.030291160725943	0	447
ET734fcYkwo	Ministério da Saúde atualiza situação sobre o novo coronavírus - 04.02.2020	no		1580849078	Ministério da Saúde	UC12zKGLhMhDeDidoctM6BrA	Nonprofits & Activism	1942	115	12	0.10434782608696	0	22
KwJsEnIMPj0	Microrganismos Vacina e Soro - Resumão ENEM Biologia - Prof. Paulo Jubilut	no		1376337637	Biologia Total com Prof. Jubilut	UCG-eghyORxNrzSG8FkAWKyw	Education	366667	12419	113	0.0090989612690233	0	435
GxunzYQdJPw	Bebidas energéticas podem gerar riscos à saúde	no		1580505012	Ministério da Saúde	UC12zKGLhMhDeDidoctM6BrA	Nonprofits & Activism	337	17	1	0.058823529411765	0	1
e0fAwNazC8s	#FalaGotinha - Vacinas para crianças de 1 a 4 anos	no		1546024103	Ministério da Saúde	UC12zKGLhMhDeDidoctM6BrA	Nonprofits & Activism	17402	202	17	0.084158415841584	0	0
ORkksEWP6KQ	Entrevista com Edmundo | The Noite (10/06/19)	no		1560267781	The Noite com Danilo Gentili	UCEWOoncsrmirqnFqxer9lmA	Entertainment	1243558	56494	967	0.017116861967643	0	3183
Ng5LwHtuquQ	AULA GRATUITA - Imunização em foco: comentários de vacinas | parte I	no		1566252009	EnfConcursos - Enfermagem para Concursos	UChHd-MU2mOvZHmBQz6zJw_w	Education	14628	828	22	0.026570048309179	0	47
pjhKchuuo_4	AS PRIMEIRAS VACINAS DO BEBÊ NA HOLANDA | Rotina com bebê | Joyce Aurora 🙋🏻‍♀️	no		1527719336	Joyce Aurora	UCmgTRw8XEjRmm6VdvkIvk2Q	People & Blogs	196330	4902	216	0.04406364749082	0
q2wXfY9B7cQ	Vídeoaula SI-PNI - Módulo 3: Cadastro de Usuários	no		1391178103	Ministério da Saúde	UC12zKGLhMhDeDidoctM6BrA	News & Politics	21093	79	8	0.10126582278481	0	0
WPxe9Wyk4-U	Mitos e verdades sobre o banho!	no		1377530508	Vida Melhor	UCCD5yY6oDcu-PvLnP4FIJ8A	Entertainment	28530	594	27	0.045454545454545	0	28
FCB7lGrJShs	SOS Mãe: mulher que tem duas filhas com microcefalia dá lição de vida	no		1483976062	Hoje em Dia	UCN-opsqqDunWO6h5uCp9Y4g	Entertainment	2706184	45606	1855	0.040674472657107	0	2201
LVmAoHKYsHE	Ex-mulher de Caio Blat revela por que afastou o filho do ator	no		1476418683	Câmera Record	UCp6tx5isUZCgQnvEwbOVC-Q	People & Blogs	7059747	53343	10989	0.20600641133795	0	4410
WwvRVxzcAXk	Vacinação de adultos está abaixo da meta do Ministério da Saúde	no		1531955819	TV Canção Nova	UCVrKQMmA2ew9LFzeIDaOFgw	Entertainment	2076	64	5	0.078125	0	0
3gepZzRyopA	Adolescentes precisam de duas doses da vacina contra HPV	no		1506085200	Rede TVT	UCmQTY7b5w61WlmBbJ5a8XrQ	News & Politics	1527	49	3	0.061224489795918	0	2
LNDbCPz1dWc	VACINAS DO TERCEIRO MÊS do Bebê | REAÇÕES	no		1555453801	Day Ramos	UC3naP3CuNBhxvRVohkUTVhA	Howto & Style	3988	123	12	0.097560975609756	0	10
85gNQIagN9M	7 Coisas Que a Cor do Seu Fluxo Menstrual Revela Sobre sua Saúde	no		1537045000	INCRÍVEL	UCIQPHl1WKKTt9KkWyo_JNig	People & Blogs	1409983	49420	1451	0.029360582760016	0	1494
k6gunIens2Q	8 COISAS QUE OS SEUS OLHOS PODEM DIZER SOBRE A SUA SAÚDE	no		1505605884	INCRÍVEL	UCIQPHl1WKKTt9KkWyo_JNig	People & Blogs	2057230	63026	1926	0.03055881699616	0	574
5pFdNgG_KII	PERGUNTA! #52: PRECISO DE VACINA DE FEBRE AMARELA PARA VIAJAR?	no		1485637203	Um bilhete por favor.	UCVZGAO0Sit9EJrV6tbbIAPw	Travel & Events	8562	332	12	0.036144578313253	0	47
FCur3doTT7E	Entrevista do Lula com Juca Kfouri e José Trajano na TVT	no		1560489981	Canal da Resistência - Paulo Pimenta	UC9dBF5Mxf5pMAc7fXdEi8AQ	News & Politics	1320319	31291	6476	0.20696046786616	0	3858
7HVNlruabDI	EPIDEMIA DE AUTISMO?	no		1580850000	CBI of Miami	UCuAaB8lLRmoZzOrc_d_Ka0A	Education	299				0	4
W_mhjKLsnsk	Jo Soares TDAH(DDA) - Ana Beatriz Silva	no		1231434331	Ana Beatriz Barbosa Silva	UC5VvsTwsyKWMZSQtt1MPCEw	Education	359107	4574	79	0.017271534761697	0	437
xr1PDun9GZA	20 anos do CDS - Depoimentos - Bloco 2 de 2	no		1448622590	UnBTV	UCUUU5zBnxg55vaXymuFJDPw	Education	155	1	0	0	0	0
mOFsWNm-nhk	Mio figlio è autistico	no		1562323506	Pianeta Mamma	UCSceTdZl4Bq6YFR4sPR5_gw	Howto & Style	9289	139	4	0.028776978417266	0	1
rloNvRuzwzE	Matéria Síndrome de Asperger no Fantástico	no		1168998377	Luis Andrade	UC1ToYrGtIHCpTA1FtJ-x0Lw	Howto & Style	523714	2591	332	0.12813585488228	0	375
L-83ZFg5Xn4	Top 5: Melhores Óleos para Cabelos Crespos e Cacheados	no		1422993199	Bruna Caixeiro	UCbFACr0PqttswP_W9heOPJg	Howto & Style	44196	676	67	0.099112426035503	0	17
XYVhHIZSn9A	Que le Causó el Autismo a Mi Hijo Julio!?!? 😭😩	no		1512085174	En Familia con Liz	UCsTmTlgq1FsoVhp-_I76Yqw	People & Blogs	1159387	16904	4032	0.23852342640795	0
piJPHT7J3h4	MÃE GELADEIRA CAUSA AUTISMO?	no		1539871205	CBI of Miami	UCuAaB8lLRmoZzOrc_d_Ka0A	Education	1841				0	19
CQ2X--uIIfc	AUTISMO - Como superei o luto Laura é autista leve?	no		1508767798	Aline Vicente	UCA1nC2t2zfzBOySscmpIzGQ	People & Blogs	49428	4661	48	0.010298219266252	0
Z6Rwt7NMqIE	MMS y salud censurada. Entrevista a Andreas Kalcker	no		1570222805	Mindalia Televisión	UCmn8oX1V_E14jsR4KXIbeSQ	Education	24111	1164	23	0.019759450171821	0	149
3wlRr3JNw-4	Comunicado Oficial Dr. Lair Ribeiro	no		1489502209	Dr. Lair Ribeiro Oficial	UCk9mgpQVdJ5oKQWkM1UPBaQ	Entertainment	34974	2819	18	0.0063852429939695	0	186
M6RBilCiz_A	EL MMS NO ES LEJÍA - Entrevista a Josep Pàmies	no		1541680545	LA CAJA DE PANDORA	UCXV8HmDQt2akopxAQQt3oeg	People & Blogs	17890	1013	34	0.033563672260612	0	168
0MKHBXjA-rk	Cuidado! Notícias falsas envolvendo meu nome | Dr Dayan Siebra	no		1558400229	Dr. Dayan Siebra	UClN6OLbLp1YjTSwDOkEM2dA	Entertainment	45175	8055	104	0.012911235257604	0	840
QLWEYEOYo8Q	AUTISMO E MEDICAÇÃO	no		1513040819	Andréa Werner	UC3lP5c55UE0ozG-uN0uBsXg	People & Blogs	28736	1850	23	0.012432432432432	0
B6KsfXipihQ	Meu filho ainda não fala	no		1492270809	Bianca Santoro	UCC1sHLVCWUBP4qmaZ8WqPzg	People & Blogs	22166	930	39	0.041935483870968	0	154
poxteia-WD0	Dietas no Tratamento do Autismo - Por Nutricionista Priscila Spiandorello	no		1335795558	Congresso de Autismo	UC-er6TPk2_XAfbSz-mPs3-A	Education	41958	738	33	0.044715447154472	0	50
LBuwGpOVjHc	A VERDADE POR TRÁS DO MMS/CD	no		1555625685	Andréa Werner	UC3lP5c55UE0ozG-uN0uBsXg	People & Blogs	39263	2630	1436	0.54600760456274	0
DTgCGsffljg	Autismo Tratamento pela nutrição	no		1472050388	Roberto Andersen	UCxJ8B-O6H2ottFrNKW-fgZA	Education	12697	725	11	0.015172413793103	0	56
4beSYDm2UpE	LUGOL e Seus Efeitos Colaterais | Dr. Juliano Pimentel	no		1521547200	Dr Juliano Pimentel	UCPGGSQfN8LREy6dWdk85fpw	People & Blogs	138860	5893	441	0.074834549465467	0	296
UNZADEuQz6Y	A VERDADE sobre o MMS (Lair Ribeiro)	no		1564333642	Nathan Vidal	UCnPjkkDT0uVuaxXfhyhkR3g	People & Blogs	16053	1342	39	0.029061102831595	0	141
MPK8_QOt-D4	MMS/CDs - A CURA PROIBIDA	no		1569104254	EU SOU	UC5zdbrXhirdxV5blrkwe-QA	Education	1769	254	3	0.011811023622047	0	93
F-ZYG8PIRSU	#006 Medicamentos	no		1444462101	TDAH Descomplicado	UCl3pbBstPZJNgLtFX4VzCwA	People & Blogs	41481	2646	31	0.011715797430083	0	291
6pylpaHuujQ	Como Reverter o Autismo e o TDAH - Tratamento Natural e Remédios Caseiros	no		1559232900	Dr. Augusto	UCp9JGvD4ptySnE0TJAK1FrQ	People & Blogs	2407	207	3	0.014492753623188	0	19
5KctA7mYiRA	BRUNO testimonio recuperación total autismo (TEA)	no		1548777588	Katia Dolle S.L.	UC2ysTeeBjznIDRKaRs6yyHQ	People & Blogs	24889	530	30	0.056603773584906	0	94
clQra_haVlo	MMS relato de uso dicas	no		1538062770	Lukinha oliveira	UC1iT5pP9zH8SYzpiEXK9I8g	People & Blogs	1345	94	4	0.042553191489362	0
KmBTeAeeweU	MMS 3 regras de ouro	no		1503323400	Décio Simão	UClXJT92i1vBvC51l00685CQ	People & Blogs	31834	1376	16	0.011627906976744	0	196
ms8-a7UrB40	Apresentação do MMS	no		1528896346	Andre Chilano	UC-v1PJRoid6DGFzY1jVU3hg	People & Blogs	12438	803	21	0.026151930261519	0	126
sZud1rvJV0E	URGENTE : Autismo Tem Cura SIM - Descubra Nesse Vídeo - Remedio Para Autismo - Dr. Lair Ribeiro 2019	no		1551222003	Dicas Naturais Online	UCquOzSBI-inhOTBgz-glU0w	People & Blogs	1891	157	1	0.0063694267515924	0	3
myFRMfxeMYY	Vacinação contra sarampo é ampliada no estado de São Paulo	no		1565477745	Band Jornalismo	UCoa-D_VfMkFrCYodrOC9-mA	News & Politics	2745	32	3	0.09375	0	3
brDeZrzZg3U	Começa a campanha de vacinação contra Sarampo em São Paulo	no		1560211929	TV BrasilGov	UCjaWLFTNqLkq3ZY2BJ4NYRg	News & Politics	1183				0	0
MWOCVWVBy-g	Carlos Bolsonaro x Rêgo Barros	no		1563839354	Os Pingos nos Is	UCzjtGnD7qqeaHW3nvDVrjQA	News & Politics	247897	15356	728	0.047408179213337	0	1768
JuxAkcTpxtM	As principais notícias do Rio de Janeiro nesta segunda-feira (10)	no		1581337875	Jovem Pan News	UCP391YRAjSOdM_bwievgaZA	News & Politics	972	66	4	0.060606060606061	0	1
dxygJmU96hM	Dicas para combater a labirintite e tontura - Todo Seu (09/11/18)	no		1542042886	Todo Seu	UCW4t6ozY9VDVeN_GHK260BQ	Entertainment	524372	21492	707	0.032895961287921	0	444
E3Et3gacIaM	Governo Bolsonaro vai bem porque está dando sequência ao meu diz Temer	no		1563832825	BBC News Brasil	UCthbIFAxbXTTQEC7EcQvP1Q	News & Politics	35426	1632	261	0.15992647058824	0	537
SuYXbwTeCi8	AO VIVO: Rádio Jovem Pan	no		1581144675	Jovem Pan News	UCP391YRAjSOdM_bwievgaZA	News & Politics	7392	191	13	0.068062827225131	0	0
tnfVjLH0ZsA	Única prevenção contra sarampo é a vacina alerta especialista	no		1554555783	Jovem Pan News	UCP391YRAjSOdM_bwievgaZA	News & Politics	8526	322	17	0.052795031055901	0	12
iM0-F19w3cE	Conheça os SINAIS antes de um infarto - Mulheres (21/02/19)	no		1550781278	Mulheres	UCDtVoSwSwQgwhcC89Nlz5Vg	Entertainment	935754	26234	964	0.036746207212015	0	538
n9XheyA8SPE	Caio Fábio no programa Pânico da Rádio Jovem Pan FM.	no		1447277534	Caio Fábio	UCT2iDke9SuPfp0XO0rr8YSA	People & Blogs	857219	18352	1199	0.06533347863993	0	1969
sMv3IKEBysM	Vlog da minha semana : Vacina contra Sarampo Corte de cabelo etc - CAROL SANTINA	no		1565989205	Carol Santina	UClmKoaOV0xdb_2HgKNmo5nA	Entertainment	22540	1843	20	0.010851871947911	0
oyYewlJh5f4	Vacinação contra gripe H1N1 vai continuar	no		1275663567	TV BrasilGov	UCjaWLFTNqLkq3ZY2BJ4NYRg	Science & Technology	35129	95	23	0.24210526315789	0
Cupb0yAXIoU	Top 10 | 10/02 | Bolsonaro se reúne com Maia MEC divulga lista de espera do SiSU e mais	no		1581345692	Jovem Pan News	UCP391YRAjSOdM_bwievgaZA	News & Politics	396	44	0	0	0	0
6ofLRt-mb5M	Comece a Comer 2 Cravos por Dia e Veja o Que Acontecerá	no		1549399500	INCRÍVEL	UCIQPHl1WKKTt9KkWyo_JNig	People & Blogs	4083662	233814	3262	0.013951260403569	0	3179
ID4C-rpM_3U	Luta contra o sarampo	no		1563843685	TV BrasilGov	UCjaWLFTNqLkq3ZY2BJ4NYRg	News & Politics	2178				0	3
MRWYNboKgJ4	Jornal da Manhã - 10/02/2020	no		1581350690	Jovem Pan News	UCP391YRAjSOdM_bwievgaZA	News & Politics	43779	1150	66	0.057391304347826	0	24
iFn2jx-_5Cs	RODRYGO DESTRUIU E FEZ GOLAÇO ! Bayern de Munique 3 x 1 Real Madrid - Melhores Momentos - 20/07/2019	no		1563675199	Lances 2.0	UCInWfLSA0oXG60F5O2HnGEQ	Sports	2537610	60098	2761	0.045941628673167	0	5346
XIsnhC1HlWo	O Brasil já chegou perto do Comunismo? | Manuela d Ávila | Mude Minha Ideia | Quebrando o Tabu	no		1561467606	Canal GNT	UC0f866RMRdL5mSVnipiOHxg	Entertainment	481615	31999	5005	0.15641113784806	0	6481
iTxF9-63sk4	Vacinação de crianças contra HPV atrasa	no		1365209273	Jornal da Gazeta	UCNl_i-ggJbZNyOLlhE7yyhw	News & Politics	26186	143	30	0.20979020979021	0	2
lzNnS7q2JZQ	Vacina gripe - vídeo Escola	no		1494517557	Ministério da Saúde	UC12zKGLhMhDeDidoctM6BrA	Nonprofits & Activism	3069	37	6	0.16216216216216	0	1
u1pt84rNlIQ	Vacinação contra o sarampo chega às escolas de São Paulo	no		1563899337	Fala Brasil	UCwVmZjJwkCUCOes5_eAIebg	News & Politics	4176	66	4	0.060606060606061	0	16
a2ItgnOAMDk	Marco Feliciano defende a indicação de Eduardo Bolsonaro à embaixada do Brasil nos EUA	no		1563815910	Pânico Jovem Pan	UC9U4nIDyIzzelXrjNQXNvxA	News & Politics	122294	4341	547	0.12600783229671	0	708
MU9IgIHyHKk	LEVEI UMA INJEÇÃO NO 🍑 | SOUSA	no		1531331078	João Jonas	UCi5_KLjyGPF4u5htAkzI16g	Film & Animation	393421	5950	483	0.081176470588235	0	234
fw7nUPy1Qm0	Vasco briga com futebol chinês por atacante equatoriano | Atenção Vascaínos!	no		1561515075	Atenção Vascaínos!	UCRfPAk1AyQXr0VHVHFtaaag	Sports	62916	6450	63	0.0097674418604651	0	417
X4ECZWVFtYs	FGTS LIBERADO - CONTAS ATIVAS E INATIVAS Novidades	no		1563544697	Educação Financeira - Cléber Miranda	UCuuKLWNMbOTV55j3Ujk18Zw	People & Blogs	2419960	188607	5959	0.031594797648019	0	5012
NtwmVFO9X-A	Itajaí intensifica vacinação contra HPV e Meningite nas escolas	no		1531248186	Balanço Geral Itajaí	UCyvhqROV3luJvtt2dLTFhAA	People & Blogs	264	1	1	1	0	0
5HrZXv6ItAU	Vacina em Escolas Públicas da Capital	no		1498169553	assembleiarr	UCRdhKdx8sCyx6KTwGmMb78g	News & Politics	3969	40	2	0.05	0	0
oOKygxmAGmk	Um mês antes de um ataque cardíaco seu corpo vai avisar você com estes 9 sinais!	no		1519651632	Cura pela Natureza - As melhores dicas de saúde!	UCYSslASzgHQ_F_vuTsmmi-g	People & Blogs	1324668	22077	970	0.043937129138923	0	582
qJjKR-Iwsn8	Bolsonaro Responde Daniela Mercury - Ela Está Desesperada kkk	no		1551836702	QUESTIONE-SE	UCybVje4N7x7xY7Ia1OoxQAw	News & Politics	1281472	81159	3252	0.040069493217018	0	8950
jCZ3e45Us5o	Músicas iguais (coincidência musical?) (#Pirula 43)	no		1346797977	Canal do Pirulla	UCdGpd0gNn38UKwoncZd9rmA	Entertainment	239403	14566	595	0.040848551421118	0	2804
roC9qqxJCo0	EBOLA | Nerdologia	no		1409241686	Nerdologia	UClu474HMt895mVxZdlIHXEA	Science & Technology	785558	71838	299	0.0041621425986247	0	2618
Q-X3gGKyq0M	Sim somos todos macacos (#Pirula 79)	no		1398954602	Canal do Pirulla	UCdGpd0gNn38UKwoncZd9rmA	Science & Technology	403044	33217	1036	0.031188849083301	0	3365
7kVRxJWw6jM	Estado Islâmico (الدولة الإسلامية) (#Pirula 86)	no		1413666240	Canal do Pirulla	UCdGpd0gNn38UKwoncZd9rmA	News & Politics	362912	15389	817	0.053089869387225	0	1613
x1E9N7MsfUg	A síndrome de Downkins (#Pirula 85)	no		1409088960	Canal do Pirulla	UCdGpd0gNn38UKwoncZd9rmA	Science & Technology	236871	17603	539	0.030619780719196	0	1940
aRV41uAnvFc	Cocielo x Justiceiros Sociais por Nando Moura! Racismo virou piada e politicamente correto??	no		1530741233	Lívia Zaruty	UCRqfUpoyxKlDFZH3-PmehFg	Entertainment	65415	4887	2998	0.6134642930223	0	1683
AHu7Ubz0MXw	O porquinho-da-índia no microondas (#Pirula 209)	no		1493332571	Canal do Pirulla	UCdGpd0gNn38UKwoncZd9rmA	Science & Technology	180240	20728	444	0.021420301042069	0	1351
FMUhEN_i6S0	O ato não compadecido: arreando Suassuna (#Pirula 77)	no		1398440986	Canal do Pirulla	UCdGpd0gNn38UKwoncZd9rmA	Education	268190	21599	2405	0.11134774758091	0	3665
d_e9juqBDis	Justiça com as próprias mãos (#Pirula 71)	no		1391861134	Canal do Pirulla	UCdGpd0gNn38UKwoncZd9rmA	News & Politics	250990	18758	1392	0.074208337775882	0	2218
05ykV3Z4Q0M	Malafaia e os argumentos anti-gay (#Pirula 57)	no		1361801804	Canal do Pirulla	UCdGpd0gNn38UKwoncZd9rmA	Science & Technology	464169	30123	2532	0.08405537297082	0	9327
Zp_1-OYWxpE	O que é uma família? (#Pirula 113.1)	no		1441889469	Canal do Pirulla	UCdGpd0gNn38UKwoncZd9rmA	Education	234574	20020	2583	0.12902097902098	0	3141
z7VAKJg5vjw	Reflexões sobre o desarmamento	no		1444606776	Canal do Pirulla	UCdGpd0gNn38UKwoncZd9rmA	Education	371769	25530	5158	0.20203681942812	0	5580
hMRZk2D8psk	Já deu minha cota pras cotas (faz uma cota) (#Pirula 46)	no		1349784844	Canal do Pirulla	UCdGpd0gNn38UKwoncZd9rmA	Education	452745	24461	2080	0.085033318343486	0	3929
1QShqmm1uKU	Pepsi fetos e adoçante (#Pirula 33)	no		1338723831	Canal do Pirulla	UCdGpd0gNn38UKwoncZd9rmA	Science & Technology	523813	32592	4961	0.15221526755032	0	4141
1JFqv8Ks81Y	Anti-vacinas terraplanistas e punh....gorilas (#Pirula 214)	no		1496581816	Canal do Pirulla	UCdGpd0gNn38UKwoncZd9rmA	Science & Technology	99574	11328	291	0.025688559322034	0	839
NeFwJ5rFYZw	Ética 3 - Morte e dor (#Pirula 18)	no		1347884746	Canal do Pirulla	UCdGpd0gNn38UKwoncZd9rmA	Science & Technology	165823	11654	136	0.011669812939763	0	1278
xnitmB22JtQ	Belo Monte é a Gota D água? (#Pirula 10)	no		1322975091	Canal do Pirulla	UCdGpd0gNn38UKwoncZd9rmA	Science & Technology	445256	20024	646	0.032261286456252	0	3094
4zokJl-Zpg8	Algo errado na educação (#Pirula 17)	no		1329616999	Canal do Pirulla	UCdGpd0gNn38UKwoncZd9rmA	Education	393941	28796	536	0.018613696346715	0	2848
LliUFR1biZY	Você deveria se expor na internet? (Resposta ao Átila) (#Pirula 317)	no		1573596208	Canal do Pirulla	UCdGpd0gNn38UKwoncZd9rmA	Science & Technology	126517	14832	142	0.0095738942826321	0	933
YcHGevYWGS4	Criacionismo [8] - Modus operandi	no		1415759345	Canal do Pirulla	UCdGpd0gNn38UKwoncZd9rmA	Science & Technology	187982	14468	309	0.021357478573403	0	3565
qC-Rwm8ueQo	Argumentos que ateus não deveriam mais usar (#Pirula 52.1)	no		1355999548	Canal do Pirulla	UCdGpd0gNn38UKwoncZd9rmA	Science & Technology	634015	35796	1479	0.041317465638619	0	7881
Gn0R-gb9SMc	Homossexualidade - ponto final. (#Pirula 29)	no		1335339506	Canal do Pirulla	UCdGpd0gNn38UKwoncZd9rmA	Science & Technology	1018627	64249	4351	0.067720898379741	0	17219
hrH7cJGPZBI	Ghira a zade e shera o delli (#Pirula 69)	no		1388368269	Canal do Pirulla	UCdGpd0gNn38UKwoncZd9rmA	News & Politics	116557	9451	687	0.072690720558671	0	1112
OPiNb4C3JBw	O resgate dos beagles (#Pirula 65.1)	no		1382155008	Canal do Pirulla	UCdGpd0gNn38UKwoncZd9rmA	Science & Technology	326898	20702	1708	0.08250410588349	0	7259
Utbz0L22_gE	Ateísmo leva à depressão? #PergunteAoAteu 10 (#Pirula 234)	no		1574506845	Canal do Pirulla	UCdGpd0gNn38UKwoncZd9rmA	Nonprofits & Activism	97649	12749	141	0.011059690956153	0	1558
01OEeNdZrqM	Pirula nas Zoropa 5 - Inglaterra	no		1369863306	Canal do Pirulla	UCdGpd0gNn38UKwoncZd9rmA	Travel & Events	53657	3908	51	0.013050153531218	0	549
Bf7EXGTh8X8	Um bate-papo com Drauzio Varella (#Pirula 196)	no		1485176431	Canal do Pirulla	UCdGpd0gNn38UKwoncZd9rmA	Science & Technology	689976	56778	1246	0.021945119588573	0	3241
xcmNSgHuPRc	Ateu neo-ateu ou antiteísta? (ou exemplo de intolerância ao teísmo?) (#Pirula 39)	no		1342702887	Canal do Pirulla	UCdGpd0gNn38UKwoncZd9rmA	News & Politics	255804	18164	531	0.029233648975996	0	2831
vX0qDA4mGyM	Vida eterna (#Pirula 73.1)	no		1394019382	Canal do Pirulla	UCdGpd0gNn38UKwoncZd9rmA	Science & Technology	269933	20236	595	0.029403044079858	0	2960
mOMIYR_ngtU	HIPNOSE - Você NUNCA vai ver o Pirula FALAR isso Novamente 😱😱😱	no		1545339603	Alberto Dell Isola	UClkNOcpdzzVTEW-SY10-DrA	Education	37896	4424	92	0.020795660036166	0	412
Up1Rq59rVCI	Tubby e a Dissonância Cognitiva* (#Pirula 68)	no		1387111831	Canal do Pirulla	UCdGpd0gNn38UKwoncZd9rmA	Science & Technology	180891	16254	375	0.023071244001477	0	1400
RqohMBQfWvk	Nióbio de cool é HOAX (#Pirula 56.1)	no		1360941636	Canal do Pirulla	UCdGpd0gNn38UKwoncZd9rmA	Science & Technology	756592	45402	7561	0.16653451389807	0	7561
3Vb6rHWOyX4	Criacionismo [7] - Mudando de nome	no		1392285602	Canal do Pirulla	UCdGpd0gNn38UKwoncZd9rmA	Science & Technology	165402	12253	177	0.014445441932588	0	2491
OvSN_q1_NLo	Tiffany e transsexuais no esporte (#Pirula 241)	no		1516033982	Canal do Pirulla	UCdGpd0gNn38UKwoncZd9rmA	Science & Technology	396751	29157	3457	0.11856501011764	0	4579
BWXBcto1Rj8	Politicamente correto anti-militância e o efeito mola (#Pirula 104)	no		1432226006	Canal do Pirulla	UCdGpd0gNn38UKwoncZd9rmA	Education	348267	29655	875	0.029505985499916	0	3402
LAZnSsBk1bI	Vício em redes sociais e Depressão em Youtubers (#Pirula 270)	no		1540085384	Canal do Pirulla	UCdGpd0gNn38UKwoncZd9rmA	Science & Technology	181191	20034	220	0.010981331736049	0	1286
vLtk_jHnLEc	Trazendo pó levando bala (#Pirula 96)	no		1421797408	Canal do Pirulla	UCdGpd0gNn38UKwoncZd9rmA	News & Politics	143361	13727	321	0.023384570554382	0	1624
c8SmQF_HpsU	Pais religião e crianças (#Pirula 319)	no		1577114431	Canal do Pirulla	UCdGpd0gNn38UKwoncZd9rmA	Science & Technology	94053	12749	184	0.014432504510158	0	1426
r7iQGy6rxfQ	Tempo Pirula e Medula (#Pirula 61)	no		1374694233	Canal do Pirulla	UCdGpd0gNn38UKwoncZd9rmA	Science & Technology	215220	19857	129	0.0064964496147454	0	2879
cFCETc1viBk	A questão Palestina 2: comentários (#Pirula 84.2)	no		1407192413	Canal do Pirulla	UCdGpd0gNn38UKwoncZd9rmA	News & Politics	185782	12809	353	0.027558747755484	0	1331
kJrgn5EW584	Difícil aprender inglês? Não mesmo. (#Pirula 89)	no		1414972804	Canal do Pirulla	UCdGpd0gNn38UKwoncZd9rmA	Education	721144	45776	1341	0.029294826983572	0	2874
ptgUy-W91W8	Etimologia de mulato e o racismo (#Pirula 294)	no		1552342044	Canal do Pirulla	UCdGpd0gNn38UKwoncZd9rmA	Science & Technology	202802	20282	935	0.04609999013904	0	2365
NgNiHEWG0V4	SEIS ADENDOS: Etimologia de mulato Caio Coppolla Bolsonaro quilombolas e outros (#Pirula 294)	no		1552674533	Canal do Pirulla	UCdGpd0gNn38UKwoncZd9rmA	Science & Technology	122376	10427	450	0.043157188069435	0	1071
mP721XCqhhQ	Índios: o que fazer com eles? (#Pirula 48.1)	no		1351134285	Canal do Pirulla	UCdGpd0gNn38UKwoncZd9rmA	Science & Technology	229922	13351	527	0.039472698674257	0	1894
OU1mJYOaHQM	O ataque ao Porta dos Fundos (#Pirula 320)	no		1577368892	Canal do Pirulla	UCdGpd0gNn38UKwoncZd9rmA	News & Politics	241307	28282	1217	0.043030903047875	0	3739
LVkklTe77Ww	Agnóstico ou Ateu? (#Pirula 26)	no		1333846769	Canal do Pirulla	UCdGpd0gNn38UKwoncZd9rmA	Science & Technology	624240	39731	1343	0.033802320606076	0	5318
ePG4rOwhuC8	A treta dos meus tweets sobre astrologia (#Pirula 262)	no		1534775500	Canal do Pirulla	UCdGpd0gNn38UKwoncZd9rmA	Science & Technology	201768	21532	485	0.022524614527215	0	3546
WI0nzR81g5U	Stephen & Alan (#Pirula 98)	no		1424211991	Canal do Pirulla	UCdGpd0gNn38UKwoncZd9rmA	People & Blogs	158456	15725	174	0.011065182829889	0	876
VFZ-JEpEGpw	Experimentos em animais e os beagles: FAQs (#Pirula 65.2)	no		1382446155	Canal do Pirulla	UCdGpd0gNn38UKwoncZd9rmA	Science & Technology	96413	6518	205	0.031451365449524	0	1236
-WfcJglsIRk	Estudar não dá em nada? : a polêmica da MC Mirella (#Pirula 300.1)	no		1555708873	Canal do Pirulla	UCdGpd0gNn38UKwoncZd9rmA	News & Politics	309642	33988	368	0.010827350829705	0	2521
uV4ahPYzrZI	Bolsonaro e Marcos Pontes contra o INPE (#Pirula 307)	no		1564101852	Canal do Pirulla	UCdGpd0gNn38UKwoncZd9rmA	Science & Technology	166142	25660	813	0.031683554169914	0	2426
3XdIRuUxwxY	Fósseis: as figuras do livro da Evolução PARTE 1 (#Pirula 210.1)	no		1493733636	Canal do Pirulla	UCdGpd0gNn38UKwoncZd9rmA	Science & Technology	104995	9754	119	0.012200123026451	0	557
BpF_bWwrzM8	A MATA ATLÂNTICA (+ corredores ecológicos; + Triplo A) (#Pirula 286)	no		1547251681	Canal do Pirulla	UCdGpd0gNn38UKwoncZd9rmA	Science & Technology	65201	7714	75	0.0097225823178636	0	552
kTjewD4LRiU	Evolução Charles Darwin e Seleção Natural Aula Grátis de Biologia - Teoria da Evolução e Darwinismo	no		1385064937	Curso Online Gratuito	UCUn9CBocrtIw6vNPYPGQ_5w	Education	1088416	35146	585	0.016644852899334	0	3720
mwQc3DnG7xc	Seca no Sudeste terra sem garoa (#Pirula 87)	no		1414332603	Canal do Pirulla	UCdGpd0gNn38UKwoncZd9rmA	Science & Technology	149444	12784	129	0.010090738423029	0	1228
8OmSeeq1s9A	Homofobia deveria ser crime? (#Pirula 291)	no		1550322052	Canal do Pirulla	UCdGpd0gNn38UKwoncZd9rmA	Science & Technology	160921	19693	651	0.033057431574671	0	2635
5r5GZ9yt1g0	RIP Marcos Pontes RIP INPE (#Pirula 307)	no		1564784929	Canal do Pirulla	UCdGpd0gNn38UKwoncZd9rmA	Science & Technology	253731	41488	2435	0.058691669880447	0	4556
2LDXSlx9puA	Missão marte? (#Pirula 88)	no		1414627204	Canal do Pirulla	UCdGpd0gNn38UKwoncZd9rmA	Science & Technology	164961	15157	525	0.034637461239031	0	970
33_aAgaRyxI	Dicas de leitura 1 (#Pirula 74.1)	no		1396139500	Canal do Pirulla	UCdGpd0gNn38UKwoncZd9rmA	Science & Technology	175129	11109	375	0.033756413718607	0	566
L51NrrK1APQ	A USP o câncer e a cura (#Pirula 117.1)	no		1445218419	Canal do Pirulla	UCdGpd0gNn38UKwoncZd9rmA	Science & Technology	458770	25465	4479	0.1758884743766	0	4560
bp1Z_INGnzk	Quem paga a pesquisa no Brasil? (#Pirula 72)	no		1393007549	Canal do Pirulla	UCdGpd0gNn38UKwoncZd9rmA	Science & Technology	93770	7031	91	0.012942682406486	0	418
9EjNl9LrADA	DINOSSAUROS: CRIANDO CASCA GROSSA (Jurássico) (#Pirula 277)	no		1552078014	Canal do Pirulla	UCdGpd0gNn38UKwoncZd9rmA	Science & Technology	92106	8339	79	0.0094735579805732	0	564
yoBMBqSBHBY	Café com Vacina - Café Com Quê? 19 | BláBláLogia	no		1495565042	BláBláLogia	UC3Ooj_iDWELBumIEDejyNHQ	People & Blogs	48457	6583	45	0.0068357891538812	0	364
3gV7-StfCOQ	FAQ Design Inteligente FOR DUMMIES (DI NÃO É EVOLUÇÃO TEÍSTA) (Pirula #323)	no		1580613669	Canal do Pirulla	UCdGpd0gNn38UKwoncZd9rmA	Science & Technology	94577	11963	154	0.012873025160913	0	1326
yb9esk6XGpg	PISA e um montão amontoado de muita coisa escrita (#Pirula 321)	no		1578701345	Canal do Pirulla	UCdGpd0gNn38UKwoncZd9rmA	News & Politics	112867	13516	256	0.01894051494525	0	1822
nHlRz0b-9LY	POR QUE TEMOS BUNDA? | Nerdologia	no		1391691604	Nerdologia	UClu474HMt895mVxZdlIHXEA	Science & Technology	1206190	98181	495	0.0050417086809057	0	2374
_2mFGUbgrZc	PERGUNTE AO ATEU (feat. Pirula)	no		1540817931	Dois Dedos de Teologia	UCzGwyAyWLB2Si6VDFpq8rjw	Education	594153	57016	4467	0.078346429072541	0	6092
ZdDNRioK84M	Sacolas plásticas: precisa proibir? (#Pirula 37)	no		1340916131	Canal do Pirulla	UCdGpd0gNn38UKwoncZd9rmA	News & Politics	89901	6359	87	0.013681396445982	0	492
g4DepZZVco0	Whatsapp: a Deep Web de bolso (#Pirula 268)	no		1539108335	Canal do Pirulla	UCdGpd0gNn38UKwoncZd9rmA	Science & Technology	224729	23916	883	0.0369208897809	0	1967
6RvjMqesXvk	Live da Saudade	no		1580330040	Canal do Pirulla	UCdGpd0gNn38UKwoncZd9rmA	Science & Technology	39312	4646	32	0.0068876452862678	0	223
JIVCY5HfPSo	Efeito Placebo (#Pirula 3)	no		1302470588	Canal do Pirulla	UCdGpd0gNn38UKwoncZd9rmA	Science & Technology	127595	9120	152	0.016666666666667	0	1166
wJngm0XLSOM	Ideologia de Gênero mata? (#Pirula 306)	no		1563840854	Canal do Pirulla	UCdGpd0gNn38UKwoncZd9rmA	Science & Technology	106829	15361	395	0.025714471714081	0	1619
qAc5d_8MpTc	Aquecimento Global - Último Round (#Pirula 32.3)	no		1381793011	Canal do Pirulla	UCdGpd0gNn38UKwoncZd9rmA	Science & Technology	499094	24396	4595	0.18835054927037	0	5810
NBucAkhu0nY	Fusão dos Ministérios do Meio Ambiente e Agricultura? (#Pirula 272)	no		1541172513	Canal do Pirulla	UCdGpd0gNn38UKwoncZd9rmA	Science & Technology	179176				0	1569
CN6lBq87eVo	CAUÊ MOURA + PIRULLA | POUCAS #34 - AGORA NO MOV SHOW | S02 EP01	no		1563231169	MOV Show	UCVrx8gt9oAHPbOjA-EjFblw	People & Blogs	469788	27914	832	0.029805832198897	0	1751
M_ZsFV1V2Mg	Resposta: O bravo sem trabalho (#Pirula 34)	no		1339558225	Canal do Pirulla	UCdGpd0gNn38UKwoncZd9rmA	People & Blogs	454877	28314	10132	0.35784417602599	0	5186
rzHJdrMVx3k	O que é a metástase no câncer | Nerdologia	no		1566482450	Nerdologia	UClu474HMt895mVxZdlIHXEA	Science & Technology	180981	25516	73	0.0028609499921618	0	518
MGG-T0A33uE	DGA - Mamãe Falei apoia Anti-Vacina	no		1535140651	Maestro Bogs	UCRoiyPUpRJxPkVZYY1fHE1Q	Comedy	52032	5237	1565	0.29883521099866	0	864
cdjfWStVgwQ	Bolsonaro vs Lula: Não tem alternativa?	no		1537887609	Ideias Radicais	UC-NwgkrLPYmzM-xoLr2GX-Q	Education	142019	17117	1280	0.074779459017351	0	2557
Nz8i2n1esXg	Ciro Gomes sabatinado por Cientistas Brasileiros (29/07/2018)	no		1532913756	Progressista	UCFyLC5lgheGX-aNl9GH1uqQ	News & Politics	84315	3587	2385	0.66490103150265	0	833
hpqGpbROVUI	Processinho da Marisinha	no		1536955293	Maestro Bogs	UCRoiyPUpRJxPkVZYY1fHE1Q	Comedy	44106	4706	860	0.18274543136422	0	696
hnaSfgGNFj0	Teste do Olhinho | Dra Ana Escobar	no		1551207109	Dra Ana Escobar	UCKtJs_zI1yzswHDWqkqHtWw	Education	1636	123	0	0	0	3
DktKsdDHnoc	Entenda a diferença entre Fórmula Infantil Composto Lácteo e Leite em Pó | Dra Ana Escobar	no		1576672200	Dra Ana Escobar	UCKtJs_zI1yzswHDWqkqHtWw	Education	2376	214	2	0.0093457943925234	0	8
4CSxlGy8JfA	Dicas Contra Gripe e Tempo Seco | Dra Ana Escobar	no		1438714095	Dra Ana Escobar	UCKtJs_zI1yzswHDWqkqHtWw	Education	9950	246	3	0.01219512195122	0	5
ufPpFPJGux0	PEDIATRIA - Febre em crianças: quando medicar?	no		1332376967	DoutorMoises	UCW3l9WndLOjhRtsg0Aa--2g	Science & Technology	436571	6152	450	0.073146944083225	0	119
wJRjUngPukY	Campanha deve vacinar 11 milhões de crianças contra poliomielite e sarampo	no		1533617763	Jornal da Record	UCmpHPgeCBgvk_fDXZQKsnAA	News & Politics	3116	27	1	0.037037037037037	0	2
xCM7H3OP9Jo	5 Sinais de Pneumonia em crianças | Dr Lucas Fustinoni Médico - CRMPR: 30155	no		1409830449	Dr Lucas Fustinoni	UCjVPaRkoIgq_Whb1QkJjGKg	People & Blogs	635319	15533	681	0.043842142535248	0	431
uM0B60DEdPY	Gripe: Antibióticos X Vacinas | Dra Ana Escobar	no		1460467454	Dra Ana Escobar	UCKtJs_zI1yzswHDWqkqHtWw	Education	18369	55	3	0.054545454545455	0	2
i3CVH_Q3EWI	Dúvidas e Dicas sobre Tosse | Dra Ana Escobar	no		1560450609	Dra Ana Escobar	UCKtJs_zI1yzswHDWqkqHtWw	Education	10980	668	9	0.013473053892216	0	23
jvNfyla1wHs	Campanha Nacional de Vacinação contra a Poliomielite e Sarampo (30 )	no		1533044859	Ministério da Saúde	UC12zKGLhMhDeDidoctM6BrA	Nonprofits & Activism	2079035	75	6	0.08	0	8
AH0AWSPYMrQ	SARAMPO Sintomas transmissão e vacina quem deve tomar e quando	no		1563296401	Almanaque dos Pais	UCy7oVBYY0FGXeeJpy6ITXxQ	People & Blogs	4353	378	11	0.029100529100529	0	38
22NV8JfIyEE	VACINAS VIP e VOP contra POLIOMIELITE | Calendário de vacinação infantil | Parte 3 e 4	no		1525549501	Enfermundo	UC8IbAhPglJ1OeC44A_Gtmqg	Education	30335	825	25	0.03030303030303	0	18
7mzumR-y5lk	Quem deve se vacinar contra o sarampo? Quais sinais e sintomas? | GNDI	no		1533933016	Grupo NotreDame Intermédica	UCsQbqbLY-uvbXSCXinr5imA	Education	1510	26	1	0.038461538461538	0	8
UJbKtUj8Nxw	Calendário de Vacinação nos Primeiros Meses do Bebê | Clínica Pró Imune	no		1476923295	Cinemátika Filmes - Produtora de Vídeo	UC4aOaBcNPsZlSREx0p71jeA	Science & Technology	21587	435	24	0.055172413793103	0	11
Ae9gkBxLhRM	VACINA MENINGOCÓCICA C | Calendário de vacinação infantil | Parte 8	no		1529208269	Enfermundo	UC8IbAhPglJ1OeC44A_Gtmqg	Education	15820	546	12	0.021978021978022	0	12
RPC7h7MtcMI	Vacinas contra Pneumonia já estão disponíveis na Imunosense	no		1497463128	Portal Ternura	UCZ9d2hCxMtceleJez4pJMNA	News & Politics	1731	39	2	0.051282051282051	0	2
ox-NknMayLk	Sarampo - Dr. Arlindo Scheisari Júnior infectologista	no		1524828602	Simples Assim	UCLpvqh2xTNg7Ewn2HyiMjxQ	Entertainment	1467	36	5	0.13888888888889	0	1
BXzw-B7vpe4	HPV na gravidez parto e risco para o bebê	no		1519650000	Almanaque dos Pais	UCy7oVBYY0FGXeeJpy6ITXxQ	People & Blogs	25735	1483	19	0.012811867835469	0	77
_VZyhP-ZnZg	Vacina dtp chorei : reacoes; cuidados #papoentremaes	no		1478559074	luciana brito	UCABvMeFftxjprbpcl3bNimw	People & Blogs	8206	142	19	0.13380281690141	0
xIP4D6UnXdw	O DIA QUE A HELENA TOMOU A VACINA DOS 4 MESES NO SUS | Mundo de Mariana	no		1535740844	Mundo de Mariana	UCUFDVVI3J0ZXtSmF9yL50xg	People & Blogs	8691	833	6	0.007202881152461	0	115
unUntPKg5oo	CONTANDO A GRAVIDEZ PRA FAMÍLIA	no		1552507527	Vício Feminino	UCtHcnXKvUqXSLQ_B1U9zpBQ	Howto & Style	497197	69953	239	0.0034165797035152	0	1792
cQaoSgzc2No	Começa campanha de vacinação contra sarampo e poliomielite	no		1533580142	Record TV Paulista	UCdd1PhFKkX96UUr8KmK1DhA	News & Politics	396	5	2	0.4	0	1
W6Kh-6dGq6w	Vacina Tríplice Bacteriana e Tríplice Viral _ Dr. Marcello Pedreira	no		1494504955	Dr. Marcello Pedreira	UCCIQoWSB2N80fU7x5ga3Biw	Science & Technology	2045	21	1	0.047619047619048	0	5
qb66OhR_KlY	Vivacin esclarece dúvidas sobre vacina Tríplice Viral (Sarampo Caxumba e Rubéola)	no		1532803527	Vivacin Clínica de Vacinas	UCbrwFkBkzcT9UmskS7g8vdA	People & Blogs	624	23	2	0.08695652173913	0	4
p2REzMi9QVY	Triplice viral	no		1419723053	Cuide se Familia	UCrJ_9o1YxOZiSqTCgKXApEQ	People & Blogs	6275	43	7	0.16279069767442	0	5
k1kOI_gxmjs	Músicas Clássicas mais Conhecidas | Mozart Beethoven Chopin Bach... Música Clásica Piano Violino	no		1484667700	Músicas Clássicas	UCKPIuWx4Eo-WXTMJfHV8zeA	Music	3431246	50158	2714	0.054109015510985	0	2026
WtgGzKRHT-Y	What happens to children with autism when they become adults? | Kerry Magro | TEDxMorristown	no		1455895597	TEDx Talks	UCsT0YIqwnpJCM-mx7-gSA4Q	Nonprofits & Activism	256320	3514	122	0.034718269778031	0	634
HZOfjMXNPik	Stranger In The Family (Autism Documentary) | Real Stories	no		1480861800	Real Stories	UCu4XcDBdnZkV6-5z2f16M0g	Education	599252	3122	392	0.12556053811659	0	1378
EIIIxig3B-M	O que provoca o Autismo	no		1574970264	Jacson Marçal	UCE3LimIhZcbjJJ7g8KA3PVg	Gaming	278	74	1	0.013513513513514	0	11
XNL9YP8PH7M	Family living with Autism: Meet the Asners	no		1469583347	Attitude	UC1pEecEFODR1WZtH5w0ZTpw	Entertainment	615507	6313	381	0.060351655314431	0	914
Th2qasF16Ew	#3 O que é poliomielite	no		1533045244	Ministério da Saúde	UC12zKGLhMhDeDidoctM6BrA	Nonprofits & Activism	8188	89	3	0.033707865168539	0	2
FJ7iPn39i08	Robert DeNiro Debates Autism s Link To Vaccines | TODAY	no		1460555799	TODAY	UChDKyKQ59fYz3JO2fl0Z6sg	News & Politics	669256	6401	856	0.13372910482737	0	3848
mXdytn5go1Q	Homem diz que Messi pode ser autista - Programa SP no Ar - Rede Record	no		1378500146	InstitutoVerea	UC8Uj2P4_Zya4x4Oghx3afRg	Education	55107	700	66	0.094285714285714	0	146
6eS2CBMSZ4E	Autism Symptoms and Behaviors - Home Video	no		1485902702	See And Do Kids	UCKfjBrg8BNO-FgRRnAw3D1g	People & Blogs	1783090	10169	801	0.078768807159013	0	1045
Ev04zWg5krg	A MENINA POBRE E O MENINO RICO #2 - A MENINA ABANDONADA - ANNY E EU	no		1531076099	Anny e Eu Family	UC8KpMaUwtS1nEkyCAzmojHQ	Entertainment	1980485	31343	2472	0.078869285007817	0
i-2zY4BdP1s	Infectious Diseases A-Z: Breaking down the MMR vaccine	no		1560809731	Mayo Clinic	UC8fQzKHIhSoZeSq3bwQx4mw	Science & Technology	3785	55	14	0.25454545454545	0	54
l8e5kO5KHIs	A Bella Itália | Roberta	no		1530218266	Giovanna Maira	UCbah7H3RLT4yWwkTd3gsCFQ	Music	4865	198	1	0.0050505050505051	0	17
y42ISQ956gM	Autism Spectrum Disorder Presentation	no		1480998738	Paulina Naslonski	UCqbgV7oxe7H6t4_xiDnXfIw	Film & Animation	330757	4198	265	0.063125297760839	0	911
Kp7NO5YAv6M	REDAÇÃO NOTA 1000: Os riscos do crescimento do movimento antivacina no Brasil - Brasil Escola	no		1564500601	Brasil Escola	UCsgHWN8lYveMUEWTDheTjZA	Education	7993	692	8	0.011560693641618	0	39
i90tVvXkDr4	Antes de Culpar a Mãe pela causa do Autismo veja esse vídeo	no		1545858653	Dra Maria Claudia Brito	UCFbx6QBTcDI6toOnO-EyajQ	People & Blogs	2402	321	2	0.0062305295950156	0	13
fJk6P_j0_x4	SELETIVIDADE ALIMENTAR | O QUE EU FIZ | AUTISMO	no		1525049440	Meu Anjo Azul	UCoi5cG7JL_kZ-LGW6-PtZ_w	People & Blogs	18390	1572	17	0.010814249363868	0	161
CbhKPJD-Hxw	Alemanha: Multas Para Quem Não Vacinar os Filhos !	no		1557328045	Alex Sousa	UCCh7IUDKaRNmmbsDheYiLrQ	People & Blogs	304	19	2	0.10526315789474	0	10
uGGWLJC64k0	Especialista explica reações causadas pela vacina do HPV	no		1412103611	ITV BRASIL 50.1	UCIeG8B36iRu6S7EZh8EFyyA	News & Politics	2901	4	15	3.75	0	3
S2tOTXMsEME	experiencia de feira de ciencias!	no		1403209673	Gamalolftbr	UCsK-uQfZEgyRL9eCHUdYQKQ	People & Blogs	340040	8128	278	0.034202755905512	0	260
Lo9aylIwstA	#VaxXed #Missouri #MTHFR #Flu	no		1478986548	VaxXed StoriesChannel #VaxXed #VaxXedStories	UCAQrR3MfrinvEviHRt5qzJA	People & Blogs	1132	38	0	0	0	3
hik3jXZ8cJA	#VaxXed #Illinois #rhogam #dtap #MTHFR	no		1478875401	VaxXed StoriesChannel #VaxXed #VaxXedStories	UCAQrR3MfrinvEviHRt5qzJA	People & Blogs	3051	95	2	0.021052631578947	0	35
q7zyyX7PK9E	COMO CONSTRUÍRAM AS PIRÂMIDES? | Nerdologia	no		1399557780	Nerdologia	UClu474HMt895mVxZdlIHXEA	Science & Technology	1405539	107334	940	0.0087577095794436	0	3561
qip5YJw-f9c	Racismo | Nerdologia	no		1437055203	Nerdologia	UClu474HMt895mVxZdlIHXEA	Science & Technology	916930	102533	873	0.0085143319711703	0	3963
RM77fAQpeTQ	Fosfoetanolamina | Nerdologia	no		1447333200	Nerdologia	UClu474HMt895mVxZdlIHXEA	Science & Technology	590479	67314	791	0.011750898772915	0	2621
eKVpOC12dNQ	Febre amarela | Nerdologia	no		1493302349	Nerdologia	UClu474HMt895mVxZdlIHXEA	Science & Technology	276840	33906	152	0.0044829823630036	0	751
yvBJg3io7q4	VIDA EXTREMA | Nerdologia	no		1387458901	Nerdologia	UClu474HMt895mVxZdlIHXEA	Science & Technology	831586	87744	225	0.0025642778993435	0	1713
l2fHd7PpzRo	O FUNGO DE THE LAST OF US | Nerdologia	no		1409839320	Nerdologia	UClu474HMt895mVxZdlIHXEA	Science & Technology	965230	80487	370	0.0045970156671264	0	2133
4YwPyZf-DDI	AS MARCAS TE MANIPULAM | Nerdologia	no		1384434002	Nerdologia	UClu474HMt895mVxZdlIHXEA	Science & Technology	1093062	107668	334	0.0031021287662072	0	2431
pyJnl2lw4pU	Medo do Escuro | Nerdologia	no		1435240801	Nerdologia	UClu474HMt895mVxZdlIHXEA	Science & Technology	803060	87549	291	0.0033238529280746	0	1856
Xo9MCcjFyIc	Uma direita anti-científica anti-vacina e anti-razão.	no		1565218172	conde loppeux	UC-aa1wREP4i9XRA5_rqed0A	Entertainment	14314	1912	214	0.11192468619247	0	799
A_Bak5dWPMs	GAMES DEIXAM AS PESSOAS MAIS VIOLENTAS? | Nerdologia	no		1394719206	Nerdologia	UClu474HMt895mVxZdlIHXEA	Science & Technology	693676	72862	315	0.004323241195685	0	2011
CM9xBCj7h5Q	O JEITINHO BRASILEIRO | Nerdologia	no		1392296406	Nerdologia	UClu474HMt895mVxZdlIHXEA	Science & Technology	1103687	99845	388	0.0038860233361711	0	1990
6J47x599ZFQ	COMO MATAR O WOLVERINE | Nerdologia	no		1382018404	Nerdologia	UClu474HMt895mVxZdlIHXEA	Science & Technology	1135549	95222	540	0.0056709583919682	0	4833
kUwzffvlZtY	Attack on Titan e como funciona o Aparelho de Movimentação Tridimensional | Nerdologia	no		1576762973	Nerdologia	UClu474HMt895mVxZdlIHXEA	Science & Technology	222496	35953	227	0.0063137985703557	0	1677
XINJpXE4eqM	AFLIÇÃO!!! | Nerdologia	no		1391086899	Nerdologia	UClu474HMt895mVxZdlIHXEA	Science & Technology	714497	83014	221	0.002662201556364	0	2114
jB3EFK_vAuo	A Armadura do Homem de Ferro | Nerdologia	no		1429192805	Nerdologia	UClu474HMt895mVxZdlIHXEA	Science & Technology	1364243	92402	486	0.0052596264150127	0	1514
JJZHgxVS_7A	Câncer tem cura? | Nerdologia	no		1568302514	Nerdologia	UClu474HMt895mVxZdlIHXEA	Science & Technology	209943	34262	115	0.0033564882376977	0	1057
VZrQODHklJk	POSSESSÃO ABDUÇÃO OU PARALISIA DO SONO? | Nerdologia	no		1388667603	Nerdologia	UClu474HMt895mVxZdlIHXEA	Science & Technology	922616	95279	379	0.0039777915385342	0	4625
YMI3CrChwSk	SEIS GRAUS DE SEPARAÇÃO | Nerdologia	no		1396533605	Nerdologia	UClu474HMt895mVxZdlIHXEA	Science & Technology	790913	72996	333	0.0045618938024001	0	1440
8X5-XxLtaSQ	ZONA DA MORTE | Nerdologia	no		1382619604	Nerdologia	UClu474HMt895mVxZdlIHXEA	Science & Technology	775135	82723	145	0.0017528377839295	0	1915
i7ZURF4AyhI	E se dinossauros evoluíssem como humanos? | Nerdologia	no		1576159206	Nerdologia	UClu474HMt895mVxZdlIHXEA	Science & Technology	257962	35361	246	0.0069568168321032	0	754
G2oXniwFXeY	LEVANTE ZUMBI | Nerdologia	no		1381413773	Nerdologia	UClu474HMt895mVxZdlIHXEA	Science & Technology	1068885	108395	335	0.0030905484570322	0	3393
eSGtN70TcJg	DRAGÃO ARROTA FOGO! | Nerdologia	no		1386853210	Nerdologia	UClu474HMt895mVxZdlIHXEA	Science & Technology	761544	79610	281	0.0035297073232006	0	1744
iItfqDViLcg	QUAL O SOCO MAIS FORTE? | Nerdologia	no		1386248406	Nerdologia	UClu474HMt895mVxZdlIHXEA	Science & Technology	1350302	106746	646	0.0060517490116726	0	6409
kKKW6RlQygM	Como seria o Tarzan? | Nerdologia	no		1424959201	Nerdologia	UClu474HMt895mVxZdlIHXEA	Science & Technology	593670	67248	272	0.0040447299547942	0	1238
fXCL3jzM1js	CONSTRUINDO A ESTRELA DA MORTE | Nerdologia	no		1390482005	Nerdologia	UClu474HMt895mVxZdlIHXEA	Science & Technology	709619	71617	224	0.0031277489981429	0	1917
CcM4eEE4R0Q	GRAVIDADE | Nerdologia	no		1383829202	Nerdologia	UClu474HMt895mVxZdlIHXEA	Science & Technology	718473	67490	269	0.0039857756704697	0	1038
8hU7f1cf7iA	Qual o maior parasita humano? | Nerdologia	no		1415278810	Nerdologia	UClu474HMt895mVxZdlIHXEA	Science & Technology	802876	71673	1003	0.013994112148229	0	2630
e-JaQOeFxtI	O que é o Coronavírus? | Nerdologia	no		1580999617	Nerdologia	UClu474HMt895mVxZdlIHXEA	Science & Technology	254313	37222	171	0.0045940572779539	0	961
c1Da6E5Ysbw	Quanto vale o nióbio? | Nerdologia	no		1567692006	Nerdologia	UClu474HMt895mVxZdlIHXEA	Science & Technology	338808	46476	384	0.0082623289439711	0	1980
0Ji9Q6sa8-o	A FRATURA DE ANDERSON SILVA | Nerdologia	no		1389272405	Nerdologia	UClu474HMt895mVxZdlIHXEA	Science & Technology	980095	96417	432	0.0044805376645197	0	2241
D3p0PRYBCPE	SIMPATIA FUNCIONA? | Nerdologia	no		1408629611	Nerdologia	UClu474HMt895mVxZdlIHXEA	Science & Technology	630497	62526	256	0.0040942967725426	0	1668
r9r_VwoZvho	Pandemias | Nerdologia	no		1457618402	Nerdologia	UClu474HMt895mVxZdlIHXEA	Science & Technology	567679	65059	215	0.0033046926635823	0	1464
reDI72wooAk	COMO CONGELAR O CAPITÃO AMÉRICA? | Nerdologia	no		1400162406	Nerdologia	UClu474HMt895mVxZdlIHXEA	Science & Technology	512163	53081	157	0.0029577438254743	0	1082
EExCImj4Ls8	OS PODERES REAIS DO MAGNETO | Nerdologia	no		1397138405	Nerdologia	UClu474HMt895mVxZdlIHXEA	Science & Technology	1008800	90657	229	0.0025260046107857	0	2730
ZK5vwrLthl0	A ascensão de Napoleão | Nerdologia	no		1575994870	Nerdologia	UClu474HMt895mVxZdlIHXEA	Science & Technology	144848	18890	60	0.0031762837480148	0	476
Bu0_AwwEBR8	COMO FAZER UM SABRE DE LUZ | Nerdologia	no		1398348034	Nerdologia	UClu474HMt895mVxZdlIHXEA	Science & Technology	1217794	91057	1078	0.011838738372668	0	2491
EusdmL4Ra7o	Quem descobriu e de quem é a Antártida? | Nerdologia	no		1579010404	Nerdologia	UClu474HMt895mVxZdlIHXEA	Science & Technology	210402	27022	120	0.0044408259936348	0	940
26AgMFsh-98	Como Funciona a Homeopatia? | Nerdologia	no		1453986000	Nerdologia	UClu474HMt895mVxZdlIHXEA	Science & Technology	682621	71273	1165	0.016345600718365	0	3021
C4eHJ8ZJgG4	CAOS E EFEITO BORBOLETA | Nerdologia	no		1389877205	Nerdologia	UClu474HMt895mVxZdlIHXEA	Science & Technology	1646330	123152	583	0.0047339872677667	0	2722
hLPLCdWyFi8	A BIOLOGIA DO GODZILLA | Nerdologia	no		1401976805	Nerdologia	UClu474HMt895mVxZdlIHXEA	Science & Technology	788813	68636	304	0.0044291625386095	0	1353
4gZr0XYY3eU	MONTANDO O ROBOCOP | Nerdologia	no		1392904806	Nerdologia	UClu474HMt895mVxZdlIHXEA	Science & Technology	622858	62888	154	0.0024487978628673	0	1661
3crSCPw7ofk	HACKEANDO O MUNDO | Nerdologia	no		1401372007	Nerdologia	UClu474HMt895mVxZdlIHXEA	Science & Technology	844525	72776	292	0.0040123117511267	0	1125
CsyH0dPxx-Y	POKÉMON EVOLUI? | Nerdologia	no		1385643606	Nerdologia	UClu474HMt895mVxZdlIHXEA	Science & Technology	733415	71966	683	0.0094905927799239	0	1501
pvcr9jxdCLo	História no filme O Último Samurai | Nerdologia	no		1576592134	Nerdologia	UClu474HMt895mVxZdlIHXEA	Science & Technology	150679	21420	55	0.0025676937441643	0	447
xWqedHeXRGg	COMO GANHAR SUPER-PODERES | Nerdologia	no		1394114503	Nerdologia	UClu474HMt895mVxZdlIHXEA	Science & Technology	1269438	83629	993	0.011873871503904	0	2250
nW-Mqe9Tgjc	Estamos ficando mais burros? | Nerdologia	no		1414069202	Nerdologia	UClu474HMt895mVxZdlIHXEA	Science & Technology	827221	77435	276	0.0035642797184736	0	1923
sJoQ9hGGsJU	Proatividade | Nerdologia Ensina 05	no		1577109613	Nerdologia	UClu474HMt895mVxZdlIHXEA	Science & Technology	119464	17238	108	0.006265227984685	0	323
uhnz7r9BQ8o	A QUÍMICA DO MAL DE BREAKING BAD | Nerdologia	no		1393509605	Nerdologia	UClu474HMt895mVxZdlIHXEA	Science & Technology	868022	74999	290	0.0038667182229096	0	1660
nl3D3Q-Rfqs	GOLPE DA MORTE | Nerdologia	no		1395324006	Nerdologia	UClu474HMt895mVxZdlIHXEA	Science & Technology	1518621	98214	836	0.0085120247622539	0	1898
2i0GsErWF50	SKATE VOADOR | Nerdologia	no		1397742816	Nerdologia	UClu474HMt895mVxZdlIHXEA	Science & Technology	507945	49662	157	0.0031613708670613	0	1099
wskKu-a8ywI	SER INVISÍVEL É POSSÍVEL? | Nerdologia	no		1388062804	Nerdologia	UClu474HMt895mVxZdlIHXEA	Science & Technology	1114513	110535	266	0.0024064775862849	0	2390
YEkJKC5mgBs	VACINAS Ele dissse tudo ISSO!! sob juramento em um tribunal (INCRÍVEL E TENEBROSO)	no		1558353623	nutrição Alimentos & Cia	UCQNi2fXhCHRu8-b-w29SMCA	Education	173683	10439	477	0.045694031995402	0	1233
5CsfRfEFKv0	QUEM VAI GANHAR A COPA? | Nerdologia	no		1402581604	Nerdologia	UClu474HMt895mVxZdlIHXEA	Science & Technology	471030	45054	480	0.010653882008257	0	4064
C2CEgSDp0Sk	As inspirações mitológicas de The Witcher | Nerdologia	no		1580829700	Nerdologia	UClu474HMt895mVxZdlIHXEA	Science & Technology	143699	23007	74	0.0032164123962272	0	496
kFSPf9257Ew	4 fortes indícios de que Deus NÃO existe - E SE FOR VERDADE	no		1521586824	Fatos Desconhecidos	UCbAiIkPobUFy71zlmwVw3jw	Entertainment	1865501	106358	21628	0.20335094680231	0	49333
zstVRbu2FV8	Não sou um robô! A verdade sobre o reCAPTCHA	no		1547989215	Integrando Conhecimento	UCkAbeyJZqp6JFYfKy-98NjA	Science & Technology	642186	68932	517	0.0075001450705043	0	2581
3k7HngPkgUM	O Irã moderno e seus golpes e revoluções | Nerdologia	no		1579615565	Nerdologia	UClu474HMt895mVxZdlIHXEA	Science & Technology	125807	16637	87	0.00522930816854	0	633
4AwW_QCYE30	Atividade física em 360 | Coluna #46	no		1467900149	Drauzio Varella	UC9zqTTVeClpqMQ5CLuJdWtw	Science & Technology	20931	1675	22	0.013134328358209	0	88
81UDliFezRI	Por que dão tanto soro nos hospitais? Ql remédio existe no soro fisiológico | Dr Lair Ribeiro	no		1550249349	U MIÓ QUE TÁ TENO	UC4F32QLrpDmmRrozxr9z59g	Science & Technology	543852	36603	1046	0.028576892604431	0	2932
Ja6ZnJUQa_0	Por que você DEVERIA se expor na Internet	no		1573221603	Atila Iamarino	UCSTlOTcyUmzvhQi6F8lFi5w	Science & Technology	184458	30871	221	0.0071588221955881	0	1145
0bGaTBPyYbw	NÃO DEIXE SEU FILHO ASSISTIR FELIPE NETO! Doação de livros homossexuais na bienal gera polêmica	no		1568062800	Canal do Ferreira	UCZ4pDPv5kdO_2Da5brOlOZQ	News & Politics	324281	47263	5995	0.12684340816283	0	7340
sXMaPAVxUE4	Nos ensinaram que ISSO não existe	no		1564253416	Fatos Surpreendentes	UC8kDe2c78xdmZ2YwPy9h-4A	Nonprofits & Activism	156269	7676	143	0.0186294945284	0	305
cEdwgAH57AM	Como prevenir o infarto?	no		1367958657	Vida Melhor	UCCD5yY6oDcu-PvLnP4FIJ8A	Music	57071	1234	64	0.051863857374392	0	19
44yG50SRxpQ	RJ: 36 27% das crianças tomaram vacina para pólio e sarampo	no		1535125784	Band Jornalismo	UCoa-D_VfMkFrCYodrOC9-mA	News & Politics	342	6	1	0.16666666666667	0	2
LSyZUrV8IDk	MARIDO ABRE MÃO DE TUDO PARA CUIDAR DA ESPOSA COM ELA [CC]	no		1502907790	TV EVANGELIZAR	UCBpwS_TPjdLt_FLgl0ZtZAg	Nonprofits & Activism	1946200	37426	463	0.012371078929087	0	3283
oBqIFoua1Qg	Alzheimer: A dor do esquecimento	no		1389862236	Revista ÉPOCA	UCKoXJUb5JUVyejefUckrOqA	People & Blogs	367437	8361	206	0.024638201172109	0	404
tuuYaOjVLgA	VACINA BCG | Calendário de vacinação infantil | Parte 1	no		1527457138	Enfermundo	UC8IbAhPglJ1OeC44A_Gtmqg	Education	29926	884	25	0.028280542986425	0	12
97MlUP6Zduc	Saúde: poliomielite pode atingir os adultos?	no		1427723072	Jovem Pan News	UCP391YRAjSOdM_bwievgaZA	Entertainment	5071	76	5	0.065789473684211	0	2
tHqGFPmyphE	Vício em refrigerante | Drauzio Comenta #36	no		1483966804	Drauzio Varella	UC9zqTTVeClpqMQ5CLuJdWtw	Science & Technology	1111529	76887	1415	0.018403631303081	0	2703
oMwUjnNL3rI	Vacinação contra sarampo	no		1531155610	TV ALFENAS	UCDo7hEeMTMHLJxRu5fnbXKg	News & Politics	3412	21	4	0.19047619047619	0	3
qsvlrkH8Avc	Você sente tontura ao se levantar rápido?	no		1374508331	Jovem Pan News	UCP391YRAjSOdM_bwievgaZA	News & Politics	818226	14131	477	0.033755572854009	0	1458
y4CdaFXqRuo	Morar só - Sou 60	no		1493046760	Sou 60	UCOqJ7A31bYTQ631pOyHQbSw	Entertainment	501050	17578	564	0.032085561497326	0	1271
thSmJ8ZFCJc	Cadeia de Frio em Sala de Vacina	no		1398617136	EpidemioChannel Br	UCh3wFqG58kJMTT_2jYBPN_w	Science & Technology	60673	471	43	0.091295116772824	0	16
F6C68uVfrFs	Governo lança campanha de vacinação para conter casos de sarampo em Roraima	no		1520427402	Jovem Pan News	UCP391YRAjSOdM_bwievgaZA	News & Politics	431	14	2	0.14285714285714	0	3
dh04Id1JJ5k	A pergunta mais séria que o ateu pode fazer ao crente ● Ariano Suassuna	no		1501159650	Saber Filosófico	UCWdXgfpEIZIGzah9_yCL-Xw	Education	2900983	133790	3599	0.026900366245609	0	16209
Z_EP-0PQYGQ	Calendário de Vacinação.flv	no		1348610216	CanalFIPMoc	UCqcgQALJgSopINSo4ojtUBw	People & Blogs	123200	971	67	0.069001029866117	0	55
rKXw01IYvPY	PROBLEMAS DA INFERTILIDADE MASCULINA	no		1488981608	DOUTOR AJUDA	UC1Nm7gQCcGvgLyVcGTXp-Ww	Education	101140	3176	66	0.020780856423174	0	146
nr2L0toAObI	Campanhas de vacinação e a REDAÇÃO do Enem | Aprendi com o Papai	no		1533852007	Aprendi com o Papai	UCK6QegB9LU1tIsslcT6KVAA	Education	5281	410	3	0.0073170731707317	0	25
zid4Niu2f18	Paciente em Fase terminal ESATER EN14.2 A (Dramatização)	no		1414426348	Daiane Nascimento dos Santos	UCz8po9AOG6nAZthb5wkcA5Q	People & Blogs	1529878	7386	1694	0.22935282967777	0	447
0w_ssBQlP2g	Aprendendo o calendário vacinal 2019	no		1532402260	Lucas Meira	UCFiFWF2iO_oNhPywupD_4Uw	People & Blogs	73936	2550	82	0.032156862745098	0	107
4OeCUnC-kFA	O Centrão decide as eleições? William Waack comenta	no		1532121815	Painel WW	UCAVq36KDhPluroMCL1BZhbg	News & Politics	171876	15430	493	0.031950745301361	0	1513
SmNbdQTy0mM	Campanha de vacinação contra paralisia infantil e sarampo começam na próxima segunda 06 JE	no		1533341786	Televisão Atalaia	UC0Uzow4iFA8PoIKE_U2rmeg	News & Politics	87	0	0		0	0
FOebsUQNk5o	PE alerta sobre vacinação contra o sarampo | JORNAL ESTADO	no		1523370604	REDE BRASIL OFICIAL	UCubxEhRi56_V4_eTzzcFwkA	News & Politics	352	16	1	0.0625	0	3
5S954gOjxlA	O Que Acontece Se Comer 2 Bananas Por Dia? Descubra Agora	no		1474927202	Natureba - Curas Naturais	UCN9eb1Z__4hietbXmwxOglw	Howto & Style	7530420	177087	7087	0.040019877235483	0	1081
G6Bna6g4IVk	10 alimentos que limpam a gordura das artérias naturalmente.	no		1477189582	Altas Dicas	UCSNQJKbyfyDIKbov3uh-tkA	People & Blogs	1583593	51659	2214	0.042857972473335	0	371
bhXWxwXXCb0	DEMÊNCIAS	no		1412768316	Paulo Cavalcanti	UCvs0YgDMR5lKC_XJglx0f-A	People & Blogs	14674	258	16	0.062015503875969	0	11
h9MtNcIz1Ic	Ana Maria Braga e o câncer no pulmão.	no		1454274277	CONEXÃO 92	UC1Dz3vC3vthE-nZq0ZyCF4g	Entertainment	2806289	36209	3766	0.104007291005	0	805
oNKBtqpNj98	Reforço da Tríplice Viral	no		1308424346	Flavia Martins	UC88EfXGkc_98Q8XoZ8k9j7g	People & Blogs	5814	16	6	0.375	0	0
qEKA-PnkBYs	Você e o Doutor: saiba tudo sobre febre amarela	no		1516123463	Hoje em Dia	UCN-opsqqDunWO6h5uCp9Y4g	Entertainment	8431	131	5	0.038167938931298	0	8
ELLE4elnYz8	Conheça os benefícios da kombucha (+ Como fazer) // Viver Bem	no		1566504439	Unimed Fortaleza	UCUtDAMp91VCfHTZ9_ypKRPA	People & Blogs	15582	71	1	0.014084507042254	0	2
kH34z9y56_w	Catapora sarampo e varíola - Parasitologia - Biologia	no		1408057405	Kuadro Oficial	UCPsFqRodwOk0esir1I2qaqQ	Education	15665	220	12	0.054545454545455	0	8
A78xF16SZW0	Confiança e coragem a quem mais precisa | Websérie: Nosso Jeito de Cuidar | Ep. 2	no		1579270287	Unimed Fortaleza	UCUtDAMp91VCfHTZ9_ypKRPA	People & Blogs	412	22	1	0.045454545454545	0	0
wAT69t-Q86g	Saiba tudo sobre a caxumba!	no		1344286980	Vida Melhor	UCCD5yY6oDcu-PvLnP4FIJ8A	Entertainment	108427	1334	82	0.061469265367316	0	124
yBifuP3CJTE	Você sabe o que é anemia falciforme? // Viver Bem	no		1565276485	Unimed Fortaleza	UCUtDAMp91VCfHTZ9_ypKRPA	People & Blogs	2820	54	1	0.018518518518519	0	6
8Mbtye4boF8	Campanha de vacinação contra paralisia infantil e sarampo começa em novembro	no		1414685923	TV BrasilGov	UCjaWLFTNqLkq3ZY2BJ4NYRg	News & Politics	379	2	0	0	0
eW3K_397gy0	Sobre a vacina de sarampo - Revista da Cidade (25/07/19)	no		1564074202	Revista da Cidade	UCun1gF57-Kv35uXZQ6Bn78A	Entertainment	2098	38	3	0.078947368421053	0	8
lBn3SNO04UU	Fluxo Sanguíneo - Invasão do Vírus	no		1233666241	academiadeciencia	UC5BKM57hcPBdRuH6bbTkYJw	Science & Technology	453102	8167	138	0.016897269499204	0	278
y2cAuMRU844	Mitos e Verdades: Febre Amarela - Você Bonita (11/01/18)	no		1515692868	Você Bonita	UCxucJ9P3mLMneYypLZYn2uw	Howto & Style	7973	162	16	0.098765432098765	0	13
IikXG7avLKc	Vacinação contra sarampo - vídeo institucional	no		1310148768	Planalto	UCjjYaSHsZSUNTSwUV8OfOrA	News & Politics	1718	5	0	0	0
8bObuVxyIiw	Você pode estar treinando à toa: saiba como treinar membros superiores corretamente // Viver Bem	no		1579720365	Unimed Fortaleza	UCUtDAMp91VCfHTZ9_ypKRPA	People & Blogs	323	32	0	0	0	0
bvHMy7VgM6A	É possível se livrar de vez das celulites? // Viver Bem	no		1564604243	Unimed Fortaleza	UCUtDAMp91VCfHTZ9_ypKRPA	People & Blogs	7102	22	1	0.045454545454545	0	0
4JMTcTiETZ4	Pra que serve o kefir? // Viver Bem	no		1567023885	Unimed Fortaleza	UCUtDAMp91VCfHTZ9_ypKRPA	People & Blogs	17515	61	1	0.016393442622951	0	3
ahzcg6dy5MM	Nossas Batalhas	no		1392596825	Abri - Associação Brasileira de Imunodeficiência	UCojMGwjEcjMzwKzscrcfQog	People & Blogs	539007	16950	238	0.014041297935103	0	456
Q-0ipCE5CT4	Pais que não levam filhos para se vacinarem podem ser multados	no		1567191099	Balanço Geral	UCqZN-NqgP7bhbctbyThSVUA	News & Politics	2025	56	5	0.089285714285714	0	29
lXMc15dA-vw	NOVA | Immunity and Vaccines Explained | PBS	no		1412607606	PBS	UCgyeJxD05YnoDquRMNBfBqw	Entertainment	100485	516	21	0.040697674418605	0	65
fkExcL3qXS8	RETROSPECTIVA CIENTÍFICA 2019!	no		1576594811	Nunca vi 1 cientista	UCdKJlY5eAoSumIlcOcYxIGg	Science & Technology	1707	431	2	0.0046403712296984	0	97
Qqc_ExxEcEY	To Vaccinate or Not? Two Mothers Debate	no		1345666271	PBS NewsHour	UC6ZFN9Tx6xh-skXCuRHCDpQ	News & Politics	34234	113	100	0.88495575221239	0
Y6s9MdNv5QM	VLOG #03 - Vacinas de 2 meses em casa (Beep) | Hexa Pneumo e Rotavírus	no		1541737091	Muita calma nessa Obra	UCd4NL_O554LRhmz4utcGYBg	People & Blogs	1243	63	4	0.063492063492063	0	7
0Csl1NKpIl0	Classic Game Room HD - BURGERTIME for Atari 2600 review	no		1232840439	80s Comics	UCh4syoTtvmYlDMeMnwS5dmA	Entertainment	65751	440	13	0.029545454545455	0	118
rQjhTNXQKp8	La medicalización de la sociedad por la Dra.Teresa Forcades - Parte 1	no		1383476401	Mindalia Televisión	UCmn8oX1V_E14jsR4KXIbeSQ	Education	52971	611	31	0.050736497545008	0	49
sxUGItxoiQ0	Qual o caminho para ser cientista no Brasil?	no		1538665207	Nunca vi 1 cientista	UCdKJlY5eAoSumIlcOcYxIGg	People & Blogs	7516	700	9	0.012857142857143	0	67
kayYXdU21Bk	PIRULA ABRE O BICO E REVELA TUDO	no		1556636414	Nunca vi 1 cientista	UCdKJlY5eAoSumIlcOcYxIGg	People & Blogs	8021	1209	8	0.0066170388751034	0	92
u2zUap1s2BE	Terraplanista explica crença	no		1574111366	Record News	UCuiLR4p6wQ3xLEm15pEn1Xw	News & Politics	250209	8194	1701	0.2075909201855	0	5517
OTGeSqr-COQ	MENSTRUAR PODE TE DEIXAR MENOS INTELIGENTE	no		1552491000	Nunca vi 1 cientista	UCdKJlY5eAoSumIlcOcYxIGg	People & Blogs	56232	12009	27	0.0022483137646765	0	1282
NamG9DqRJ0E	Lucas lucco part. Fernando e Sorocaba - Foi daquele jeito (Letra + voz)	no		1421137911	Villa Music	UCOeb7hXfWgeCLEgM-7fmwhQ	Music	160951	1781	34	0.019090398652442	0	46
V6185bks0hU	Dica de produtos: Câncer e Menopausa	no		1450285494	Tira o lenço e vai ser feliz	UC3K701GE5SdbCQwR_3r8jzQ	People & Blogs	2825	164	2	0.01219512195122	0	2
769ZYU1-bMg	O segredo para uma boa memória	no		1549634400	Nunca vi 1 cientista	UCdKJlY5eAoSumIlcOcYxIGg	People & Blogs	4116	742	4	0.0053908355795148	0	36
muVfmU9FeWA	A TERRA É PLANA? | Matemática Rio feat. Canal do Mundo	no		1484732960	Matemática Rio com Prof. Rafael Procopio	UCjIPRjJZtGhzWD2LrEKOHMA	Education	224432	7612	3035	0.39871255911718	0	8635
8-xXFp2iMVE	Fora de Cogitação - Giovanna Ruiz - Prévia	no		1564977877	Poli Prévias	UCy14ALftdLPFvTgZ8HoW3JA	Music	60155	1634	29	0.017747858017136	0	134
V73rpsXTYLg	Zeolita e seus benefícios .	no		1536093728	MEDICINA QUANTICA DR DAVI RODRIGUES	UCObLld43EhuoGxJZCadLKpQ	Science & Technology	47982	3201	49	0.015307716338644	0	419
tyWvkCnxwfo	Administração de medicamento	no		1332596706	Medicina Uniube 22	UC7xks0e9MwoZbisBIZfgOww	People & Blogs	6285220	10061	4775	0.4746049100487	0
ZltBGiJj58s	WARNING! The Truth About What s REALLY In The FLU Vaccine	no		1541799044	Watchman Reports	UCzzQnR2e5VIgziK3SiJ6uIg	Nonprofits & Activism	10648	470	11	0.023404255319149	0	135
wChLPs7LPYo	Facts about the flu - English	no		1477684221	Registered Nurses Association of Ontario	UCEEdi5XBbidJ5fThh-RKdnQ	Education	9396	61	4	0.065573770491803	0	13
h1HoP1zHTEw	ESSA PLANTA PODE DESTRUIR SEU FÍGADO!	no		1550502004	Nunca vi 1 cientista	UCdKJlY5eAoSumIlcOcYxIGg	People & Blogs	8614	1606	5	0.0031133250311333	0	156
FnIkboQBZP0	7 MITOS SOBRE O AQUECIMENTO GLOBAL	no		1580828404	Nunca vi 1 cientista	UCdKJlY5eAoSumIlcOcYxIGg	Science & Technology	1486	391	8	0.020460358056266	0	94
POof-764O-g	Vacina Rotavírus (Atualização 2019) - Profª Juliana Mello	no		1571468600	ENFrente Enfermagem Continuada	UCD9kk0EUEtflrRl6TV0lDyA	Education	1521	178	1	0.0056179775280899	0	12
YpK034AryWw	REALMENTE tem MERCÚRIO na vacina da FEBRE AMARELA afirma cientistas da USP	no		1519276155	A farmácia de Deus com Lisa Santos	UCstv_dyLeuAbDB8ISTfkFbQ	People & Blogs	1808	158	9	0.056962025316456	0	29
2bBQt53D9M0	BCG vaccination	no		1252423616	Manpreet Saini	UCqida351Ab3xKJgIbwWtjeQ	People & Blogs	24111	15	13	0.86666666666667	0	7
7SkWEai988k	Treinamento do cérebro com neurofeedback para controle do TDAH ansiedade insônia e dor crônica	no		1495215542	Clínica Higashi	UCJwqS9dQlV62tpNkqbNTZ8g	Science & Technology	13824	288	5	0.017361111111111	0	7
gzoFAnE4jP8	FÉRIAS NA FAZENDA TALISMÃ | #VLOG	no		1485184338	Jéssica Beatriz Costa	UCcf_-DBdNgyZoK4OYGbgmfg	Travel & Events	414697	12473	347	0.027820091397418	0
zm6aJfyr8ig	Autismo: Causas (Dr. Carlos Gadia)	no		1423759847	Jujuba Autismo	UCf-5A0NhBAc951Fnpg8fJcg	People & Blogs	15497	302	9	0.029801324503311	0	20
9jdwBExnRww	Autismo Primeiros Sinais	no		1452764131	PIN Progresso Infantil	UCv_d2jfwfd1qj3VuF_jOAEw	Entertainment	94188	630	43	0.068253968253968	0	39
oScfQN1gk4A	Convulsão Crise epiléptica - Epilepsia. Entenda as causas com Neurologista Saulo Nader	no		1462381203	NeurologiaePsiquiatria TV	UCPSF_i4TthY5-7XMnLjh2jQ	People & Blogs	90398	3097	61	0.019696480464966	0	286
TVJM19buuwc	HPV-vaccin | Zorg.nu (AVROTROS)	no		1479724695	Zorg·nu	UCdWq6NIL_jKyLEBNBT_w8vw	People & Blogs	12347	91	8	0.087912087912088	0	78
o40dZe8UX-g	Autismo: Sinais de Alerta (Dr. Carlos Gadia)	no		1423582229	Jujuba Autismo	UCf-5A0NhBAc951Fnpg8fJcg	People & Blogs	56484	1062	24	0.022598870056497	0	24
8PprL6KW51Y	Esquecimento ou desatenção? | Drauzio Comenta #72	no		1511787601	Drauzio Varella	UC9zqTTVeClpqMQ5CLuJdWtw	Science & Technology	822776	57928	461	0.0079581549509736	0	1068
mq-Pu2mBOBo	VACINA BCG DEU INFLAMAÇÃO !	no		1493921250	Como nascem os pais	UCcw1Aw5GCxc8dIkssjKvRBg	People & Blogs	1174756	11920	946	0.079362416107383	0
B5bAMJRwW44	Fazenda Talismã área total 117 Alqueires São equivalente 566 28 hectares Anapu-Pa	no		1562455748	AGRO NORTE	UCD8dqcY0XiLBA1Z4NalNqdw	People & Blogs	22412	528	31	0.058712121212121	0	43
yr0rrbMzYe4	Autismo- 10 Coisas que todo autista gostaria que você soubesse 1/2	no		1551368197	Diário de um autista	UCbhT_vtlwr7X2wG6q_0mWVQ	Film & Animation	558964	50636	267	0.0052729283513706	0	1950
1rAfYEFAIdU	Agressividade e autismo	no		1525356459	Luna ABA	UCk0U1Js-um2lRjSF3VoS_3A	Education	7465	562	5	0.0088967971530249	0	25
eaMu60BJqXw	新型インフルエンザ NYでワクチン接種はじまる（09/10/07）	no		1254884256	ANNnewsCH	UCGCZAYq5Xxojl_tSXcVJhiQ	News & Politics	127033	46	39	0.84782608695652	0
HrvTsw8GLMI	Um Teste de Cor que Pode Dizer a Sua Idade Mental	no		1519252847	INCRÍVEL	UCIQPHl1WKKTt9KkWyo_JNig	People & Blogs	11884579	307781	24110	0.078334919959322	0	52225
h7KCbMTetXU	Autismo em meninas e adolescentes	no		1492274361	Falando de Autismo com Ana Paula Müller	UCJl_ERzQBci1wgg3UdM1bVQ	Education	22587	1333	23	0.017254313578395	0	85
rKyvY1_qnhQ	Recensioni Neurofeedback autismo | Mente Autism	no		1510655662	Mente Autism	UCYq0FWUvxm5mQAu33kIoqDw	Science & Technology	1167	1	0	0	0
yAXbwt5m9oo	Beber Água em Jejum! Opinião do Especialista.	no		1542455703	Dr. Fernando Lemos	UChXNyp6dL_aY_3qwVgDd-EQ	People & Blogs	3457817	304147	5872	0.019306453787149	0
0BzWtXP6mQc	OS PIORES E MELHORES ALIMENTOS PRA SAÚDE DO BRASILEIRO. (SEM CORTES) TV GAZETA.	no		1536276600	Palestrante Tiago Rocha	UCfMqB9cB9RfC1r2CMPnYDNw	People & Blogs	2027909	67001	2337	0.03488007641677	0	3453
BGwPSrbFS-o	LABIRINTITE - O QUE NÃO PODE COMER? | DR JOSÉ NETTO - OTORRINO	no		1547946034	Dr.José Netto - Otorrino	UCfUkLCazuGSyGp5lopQdytA	Education	339345	31233	504	0.016136778407454	0	807
dYr7qTws59o	Neurofeedback y Autismo	no		1294109588	Instituto Colombiano de Neurofeedback	UCpmlqG2aLA1UwdCYTJY-Mzw	Science & Technology	7655	17	0	0	0	4
SdQSMxHadeQ	Leonardo em sua Fazenda Talismã	no		1552911014	Pra Sempre Leandro e Leonardo	UCmp184bsu3urmbLyGbHJlYw	People & Blogs	5209	57	1	0.017543859649123	0	1
agscDJSfjkA	PARA QUE SERVE O RIVOTRIL (CLONAZEPAM)	no		1543001488	Saúde da Mente	UCZrvYw-aW36ztpZcCZC-eoQ	Education	1159672	70295	1451	0.02064158190483	0	4741
SkbjKgmZO9s	GLOBO AO VIVO 10/02/2020 JORNAL HOJE - SESSÃO DA TARDE	no		1581109739	TV Teen	UC-fJ1bq30ZRdb4kM6aZt64g	People & Blogs	649496	4872	956	0.19622331691297	0	0
uCnfkmDxf4o	Cantor Leonardo Na Fazenda 3 M Comprar Mais Bois Na Sua Fazenda. Talismã	no		1509627800	Thamara Pricila Olioveira	UCBRc4S-bD40HD9kv2XLW7yg	People & Blogs	1289381	6642	450	0.067750677506775	0	138
Z3gPzS1__BA	Los mitos de las vacunas y el autismo en los niños 💉	no		1530858601	guiainfantil	UCRJQw-oofyAgFv3JlnIAxZQ	Education	9692	89	32	0.35955056179775	0	45
0yQdSmCwTFU	A Saúde Responde: É verdade que posso contrair autismo se tomar a vacina?	no		1495838399	Secretaria Municipal da Saúde de São Paulo	UCV32l4Xk6vXOemE60pZ41Sg	People & Blogs	50	2	1	0.5	0
Z36yX157l04	Neurofeedback y Autismo	no		1387555130	Neurocyt	UCzGmaC039FOPY8oHRAEqGvw	People & Blogs	9997	92	6	0.065217391304348	0	5
0PHsw75wH20	De Gevaren van de HPV-vaccins Gardasil & Cervarix (HPV vaccinatie bijwerkingen Baarmoederhalskanker)	no		1344111536	HealthRanger7	UC7TPDB18dXnlv0C4zzYsS3Q	Education	31366	66	12	0.18181818181818	0	21
FS-46XLWDU4	Vítimas de vacinas!Por que os postos de vacinação se negam a fornecer as bulas?	no		1496811144	verdade oculta	UCiEkAcqLrULGkv2TcnsvL_A	People & Blogs	7890	268	7	0.026119402985075	0	57
i-sWBZu-pIs	Bebe tomando a vacina BCG	no		1314539107	Irene Passos Santos	UCZ18OYPiEd-m_IyltxdITxQ	People & Blogs	259782	730	107	0.14657534246575	0	50
oPrtv7Qo4KM	Justiça determina que pais vacinem o filho no interior de SP	no		1566196929	Domingo Espetacular	UCP-Vg2PcmLiWpEdvMI1R35w	Entertainment	6835	149	14	0.093959731543624	0	133
xYhe68-CShw	Chefe da Secom entrega defesa à Justiça Federal	no		1581114093	Jornal da Gazeta	UCNl_i-ggJbZNyOLlhE7yyhw	News & Politics	121	4	0	0	0	0
MIRQx8-SfsU	Previsão do Tempo – 07/02/2020	no		1581115117	Jornal da Gazeta	UCNl_i-ggJbZNyOLlhE7yyhw	News & Politics	687	42	3	0.071428571428571	0	1
fcdK-pfYy9U	Aviões da FAB com brasileiros à bordo deixam a China	no		1581114014	Jornal da Gazeta	UCNl_i-ggJbZNyOLlhE7yyhw	News & Politics	6989	299	4	0.013377926421405	0	68
JJ030XFQpJo	Eleição é como self-service	no		1581027981	Jornal da Gazeta	UCNl_i-ggJbZNyOLlhE7yyhw	News & Politics	2449	206	19	0.092233009708738	0	27
bRGhDK2hpsY	A homeopatia funciona?	no		1548367706	Dr. Lair Ribeiro Oficial	UCk9mgpQVdJ5oKQWkM1UPBaQ	Entertainment	22887	2000	92	0.046	0	164
VIaYeke5b6E	O que é Homeopatia? | Como funciona a Homeopatia?	no		1480017263	BOA VONTADE	UCedt33latJW7StRfdF4-1FQ	Entertainment	71557	1550	111	0.071612903225806	0	147
f3FHpd1sInE	Coronavírus - Jornal Da Gazeta - 06/02/2020	no		1581032068	Jornal da Gazeta	UCNl_i-ggJbZNyOLlhE7yyhw	News & Politics	1746	91	9	0.098901098901099	0	5
evGT_OtUilE	Previsão do Tempo – 06/02/2020	no		1581028199	Jornal da Gazeta	UCNl_i-ggJbZNyOLlhE7yyhw	News & Politics	836	31	2	0.064516129032258	0	0
6BlMByBtid0	Aversão a livros é perigosa patologia	no		1581114253	Jornal da Gazeta	UCNl_i-ggJbZNyOLlhE7yyhw	News & Politics	4331	602	10	0.016611295681063	0	66
gM9jcPsWy1g	A deputada Federal Sâmia Bomfim (PSOL) sobre a lei que pune homofobia em São Paulo	no		1581116577	Jornal da Gazeta	UCNl_i-ggJbZNyOLlhE7yyhw	News & Politics	1363	32	12	0.375	0	21
i8fi0Gyg7b0	Jornal Da Gazeta - 07/02/2020	no		1581118666	Jornal da Gazeta	UCNl_i-ggJbZNyOLlhE7yyhw	News & Politics	2159	114	8	0.070175438596491	0	2
GxS7mtc2M-I	Notícia sobre vacina contra o câncer viraliza nas redes sociais e o Na Real checa se é verdade:	no		1507223672	Jovem Pan News	UCP391YRAjSOdM_bwievgaZA	News & Politics	2124	66	5	0.075757575757576	0	3
eqVCqEwl61Q	Clarice Madruga da Unifesp sobre a movimentação financeiro do tráfico de drogas	no		1581030132	Jornal da Gazeta	UCNl_i-ggJbZNyOLlhE7yyhw	News & Politics	142	8	3	0.375	0	0
5_3qf5ei0Gk	Ministro do Supremo homologa delação de Sérgio Cabral	no		1581027563	Jornal da Gazeta	UCNl_i-ggJbZNyOLlhE7yyhw	News & Politics	222	24	0	0	0	0
E5ujAGgE_gE	Pela primeira vez União recebe recursos recuperados da Lava Jato no Rio	no		1581114339	Jornal da Gazeta	UCNl_i-ggJbZNyOLlhE7yyhw	News & Politics	410	4	0	0	0	0
2RTZGsn336g	Ação da polícia que matou nove jovens em Paraisópolis é considerada legal	no		1581113709	Jornal da Gazeta	UCNl_i-ggJbZNyOLlhE7yyhw	News & Politics	371	55	4	0.072727272727273	0	8
s580DJcdVQM	Morre Kirk Douglas famoso por clássicos como Spartacus	no		1581028694	Jornal da Gazeta	UCNl_i-ggJbZNyOLlhE7yyhw	News & Politics	516	21	3	0.14285714285714	0	0
laOxYr6zPac	SARAMPO | SINTOMAS | TRANSMISSÃO | PREVENÇÃO | CAUSAS | TUDO QUE VOCÊ PRECISA SABER	no		1520486958	Estudar Mais Biologia com Prof. Jonatas Fontinele	UCDmPh4In2CrcuFI-e-hD9nA	Education	3649	118	0	0	0	11
8J8wPNbtv7Q	Juíza decreta transparência no caso Lulinha-Oi	no		1581114455	Jornal da Gazeta	UCNl_i-ggJbZNyOLlhE7yyhw	News & Politics	1398	92	18	0.19565217391304	0	10
AYifJcNHG5U	Amazonas pede ao Ministério 50 mil doses de vacina contra sarampo	no		1519427134	Band Amazonas	UCi0ftpk_k9UhC2oNrnxatNA	News & Politics	377	2	0	0	0	0
eppdHj023gs	Vacina para infecção urinária	no		1507643535	Sr. & Sra. Montino	UCOTX5HwSR_EWuOY0OMDiAig	People & Blogs	5052	109	0	0	0	12
wCE5LKCMnDE	Feijão você tem que saber disso urgente!!! - Ivandélio Sanctus	no		1566439249	Ivandélio Sanctus	UCdKg0aioEqn_tbfBGz_ltFw	Entertainment	61898	6888	80	0.011614401858304	0	436
D8LUip1FsjU	O verdadeiro problema das vacinas em Portugal	no		1492701579	Paulo Almeida	UCzNDWqT0AuqQx188JGV5Taw	Comedy	3946	143	3	0.020979020979021	0	11
S9hE5fGq9P4	Matéria Vacina Sarampo	no		1533225973	Tv3Fronteiras	UCwHG6bZ-zd9tffVc4QwtOoA	Education	261	4	0	0	0	0
65ksYdR5Ggg	Prefeitura de São Paulo divulga lista com blocos de rua	no		1581115555	Jornal da Gazeta	UCNl_i-ggJbZNyOLlhE7yyhw	News & Politics	213	4	4	1	0	0
DmQMrUEXQl8	DERMATITIS MANOS TTO ISOTERAPIA Y MICROBIOTA.	no		1486399650	Santiago de la Rosa	UC62VmJ_dnZHvSboIRn9Zc9Q	Science & Technology	735	2	2	1	0
SwigfFzQQlE	Corinthians derrapa em estreia na Libertadores	no		1581028847	Jornal da Gazeta	UCNl_i-ggJbZNyOLlhE7yyhw	News & Politics	134	3	3	1	0	1
5Tx_2KxcOsU	Febre Amarela e a Homeopatia	no		1519041600	Iva Maria	UC6UHPM2GGZxn2L8-EkJCR7Q	News & Politics	621	13	1	0.076923076923077	0	2
h5l-E9kZL6w	Agenda Cultural tem de exposição sobre o Carnaval a dica para maratonar indicados ao Oscar	no		1581115331	Jornal da Gazeta	UCNl_i-ggJbZNyOLlhE7yyhw	News & Politics	106	5	3	0.6	0	1
7TPeqJXoS4A	Drauzio Varella fala sobre homeopatia	no		1304028769	Rafael M	UCIy00Leb2ZETBw9_U0Yg7fg	Education	170066	2234	432	0.19337511190689	0	791
Ae1o03VbBdc	Oxitocina - o hormônio do amor e amizade	no		1534129002	Dr. Alain Dutra	UCRLKi_9gQNthwlKi70qi54g	Science & Technology	12828	1026	12	0.011695906432749	0	91
jGlaU7Ui-5Y	Alimentação para GRIPE	no		1398076352	Tua Saúde	UCUp-GSUuNxSZ7cxOg7ZnyqA	Science & Technology	235769	4958	102	0.020572811617588	0	138
uKxMk0-YU6c	Descubra como é feita a vacina contra a gripe do Instituto Butantan	no		1460759255	Canal da Saúde	UCpZO2Fi6cd_PXZNH0yeGjSw	News & Politics	25836	251	34	0.13545816733068	0	33
QHZkGJCXlFw	A vacina da gripe causa reação?	no		1524166590	Ministério da Saúde	UC12zKGLhMhDeDidoctM6BrA	Nonprofits & Activism	15659	92	14	0.15217391304348	0	7
A4qCWwDkWjI	Gripe H1N1: quem pode se vacinar| Maternidade Santa Joana	no		1461870502	Hospital e Maternidade Santa Joana	UCQsJ3UMMUwo_xCW4z5ba_EA	Entertainment	6237	50	3	0.06	0	4
Bih1ZZA0gcE	Vitamina D: Quando e como suplementar?	no		1485945303	Victor Sorrentino	UCyF-Ubm2ALNTtSiYdG-Ezqg	People & Blogs	311500	12140	258	0.021252059308072	0	605
BZvI0tFvt-I	Saia da ROTA do Infarto e do AVC - Com Dr Lair Ribeiro - CORAÇÃO ANTI-INFARTO	no		1523495740	Junior Hallak Medicina e Saúde	UCPR3gVNYBzi-02_O4noC1Zg	People & Blogs	245740	21838	364	0.016668193057972	0	630
5LflRyTSVD8	Saúde: mitos e verdades sobre vírus influenza e a vacina da gripe	no		1428901612	TV Chris Flores	UCmvavXl7cZAx-qXoDrmEqvw	People & Blogs	14896	195	15	0.076923076923077	0	17
Uf5sA4dhRaU	Distúrbios psicológicos incluso autismo intoxicações por metais e soluções. Salutis TV Guarulhos.	no		1553387268	João Carlos Baldan	UCeDX3cRwyEND1InTK4Iod2g	Science & Technology	2606	217	1	0.0046082949308756	0	40
JUIaeUQQ3oY	VACINA H1N1 NAO TOME PESQUISE ANTES!.wmv	no		1266467539	Carlos Iafelice Junior	UCkYT8YPzCP0bGJkO6RBeRuA	Education	12604	395	4	0.010126582278481	0
-aiOs0m3Yd4	Precisa tomar a vacina da gripe todos os anos?	no		1524158463	Ministério da Saúde	UC12zKGLhMhDeDidoctM6BrA	Nonprofits & Activism	2316	37	4	0.10810810810811	0	0
VcE2QKOtKuA	Vejam o horário que tomo o Lugol e demais suplementos.	no		1527517490	Viver com Saúde e Atitude	UCa1o8yRux22rDwRbEjokSPg	People & Blogs	24397	1067	44	0.041237113402062	0	131
yV8b-Xc__4s	HIPOTIREOIDISMO? (EXAMES) Com resultado 6 ou 7 ?	no		1529612079	Viver com Saúde e Atitude	UCa1o8yRux22rDwRbEjokSPg	People & Blogs	7772	200	12	0.06	0	51
HT79567RwjI	🔴 BIÓPSIA!!! Fazer Ou Não Fazer!!! E A Eficiência Da Quimioterapia!!! Dr. Lair Ribeiro	no		1552144373	SAÚDE & BEM ESTAR	UCe1XNXkGImWSq5n4wkzNjBw	People & Blogs	13218	1209	8	0.0066170388751034	0	61
7CPchzp5MDA	A polêmica do Lugol | Tomar ou não tomar ?	no		1545580698	Dr. Alain Dutra	UCRLKi_9gQNthwlKi70qi54g	Science & Technology	19848	2669	39	0.014612214312477	0	277
tNyVcFPSSvQ	Lugol 2 gotas diárias? O quê mais que isso? Edema pulmonar e insuficiência cardíaca.	no		1525445668	Viver com Saúde e Atitude	UCa1o8yRux22rDwRbEjokSPg	People & Blogs	113005	3402	526	0.15461493239271	0	504
uBV6e3aL1SQ	IMPACTANTE! Dr. Lair Ribeiro x Indústria farmacêutica e adoecimento	no		1541902222	O NATURAL É MELHOR	UCwQhAc44SfDvhdCQiHluBVQ	People & Blogs	18563	2054	19	0.0092502434274586	0	117
qZs2gMBMXfY	O remédio que veio do Céu para tratar gordura no fígado | Dr Dayan Siebra	no		1552790601	Dr. Dayan Siebra	UClN6OLbLp1YjTSwDOkEM2dA	Entertainment	907382	77370	1639	0.02118392141657	0	3312
uMQVVDsbFA8	Aula Nutrição Italo Rachid	no		1507067715	DJNenoMIX Brasil	UCVxo-mC-IbvtfWgFld84kpg	Film & Animation	20795	954	23	0.024109014675052	0	50
SSsS80d1dto	Recebi ameaças por causa da AVEIA?	no		1565052689	Dr. Vitor Azzini	UCIR_frYnXbvJnkSycoqM62g	People & Blogs	47887	5201	228	0.043837723514709	0	919
JSkNaju8KRc	LUGOL 200 mcg QUE DR LAIR RIBEIRO COMENTOU. Baseou-se pela tabela nutricional da ANVISA.	no		1528664262	Viver com Saúde e Atitude	UCa1o8yRux22rDwRbEjokSPg	People & Blogs	3337	133	11	0.082706766917293	0	29
my9hseFV_ik	Diferença entre a vacina da Gripe do SUS e Rede particular	no		1460417837	Saúde Curiosa	UCHGEEhJYJMgWRw7UPYlqxmQ	People & Blogs	2761	32	3	0.09375	0	1
ijfc4fCClH0	Iodo café e o Câncer.	no		1478253527	Prof. Dr. José de Felippe Jr.	UCQTOPLEFah0hBCB7dmaoPtw	People & Blogs	96743	3487	172	0.049326068253513	0	254
RRjFXOqXD5U	MINHA REAÇÃO AO TOMAR A VACINA DA GRIPE H1N1 LIVIA STURNIK	no		1526659206	Lívia Sturnik	UCYoxYA3waaqzJhO_exqCQnw	Entertainment	15818	776	69	0.088917525773196	0
M4YEOkgncrw	Vacinas são boas? O perigo do mercúrio!	no		1537670076	Rafael Guerra	UCj0_I61NA_sCFI2JW4QdOCQ	People & Blogs	580	60	3	0.05	0	3
iVGiu1OSqlk	COLESTEROL GORDURA E ÓLEO - DR LAIR RIBEIRO	no		1542152919	U MIÓ QUE TÁ TENO	UC4F32QLrpDmmRrozxr9z59g	Science & Technology	44619	4339	43	0.0099101175386034	0	361
bKAhchkULvU	Lair Ribeiro A cura para Gripe aprenda a nunca mais ter uma gripe	no		1520545049	RECEITAS E DICAS DE SAÚDE	UCuqsl-IppoFW0uNPQfbXAVg	Entertainment	154541	5283	169	0.031989399962143	0	182
-hzULA6U0uQ	Como o Mercúrio age sobre o Alumínio	no		1329151326	Apliquim Brasil Recicle	UC5GmNYE1nCfITp9xpyBY7ng	Education	28916	107	11	0.10280373831776	0	9
_AgNWJMkC-w	Vacina da gripe 2017 e efeitos colaterais: o que pode acontecer? Dra Flávia Oliveira	no		1497487943	MEDPRIMUS	UCqikGdV6Uh1YW800PkmcmpA	Science & Technology	143	2	0	0	0	0
xbpeiH8UqEM	É possível eliminar um Câncer?	no		1458664572	Degivaldo Bezerra	UCptYdjTFCDVdkU5nbLmylcQ	People & Blogs	119949	707	48	0.067892503536068	0	2
tD6EYsXAS6A	vacina da gripe para toda a população a partir de segunda-feira - oi????	no		1496455134	Ana Paula Palagar	UCLr31O2rNob_pzh1UnPcNOg	Entertainment	12771	1174	31	0.026405451448041	0	206
edgedef>node1 VARCHAR	node2 VARCHAR	directed BOOLEAN
NqbzYcuKEgs	lADFsGGPDSo	true
NqbzYcuKEgs	TyYDHDe04fg	true
NqbzYcuKEgs	B_MsnZTHwSQ	true
NqbzYcuKEgs	vIfJbB43Ca4	true
NqbzYcuKEgs	GlQBtRqBHXw	true
NqbzYcuKEgs	AZ6-hDi-mn8	true
NqbzYcuKEgs	8fsHiYFuaAk	true
NqbzYcuKEgs	3sERJkRTA6E	true
NqbzYcuKEgs	ZxgpbRkVu_Q	true
NqbzYcuKEgs	QYpd_kHcIXQ	true
NqbzYcuKEgs	xWV2ndHVPOw	true
NqbzYcuKEgs	MSA7ItalCQk	true
NqbzYcuKEgs	zrmkS2YR2pE	true
NqbzYcuKEgs	03r6cYgVoEY	true
NqbzYcuKEgs	clP6AmsREjQ	true
NqbzYcuKEgs	IORKEU8oVFg	true
NqbzYcuKEgs	HGyLTOS4WgM	true
NqbzYcuKEgs	qz7hG2IHJC8	true
NqbzYcuKEgs	5ymr8JwOcHw	true
NqbzYcuKEgs	0dDMLSo93kQ	true
NqbzYcuKEgs	U8iUGMthWT4	true
NqbzYcuKEgs	UM_mnIhHOXs	true
NqbzYcuKEgs	OARuMYmmuBo	true
NqbzYcuKEgs	q6P4BtDfUxw	true
NqbzYcuKEgs	-emUlUIcKZE	true
NqbzYcuKEgs	gcBLVSnNeH4	true
NqbzYcuKEgs	4r_MsTUHmv0	true
NqbzYcuKEgs	GCPRAiGLPaQ	true
NqbzYcuKEgs	D4v14-KUnws	true
NqbzYcuKEgs	AU6TygEsQaI	true
NqbzYcuKEgs	nQPv6FKymnc	true
NqbzYcuKEgs	E6IjllgpWdc	true
NqbzYcuKEgs	0N2rqAHsxcs	true
NqbzYcuKEgs	L-8N_N5RhMI	true
NqbzYcuKEgs	T1ArUvap1NI	true
NqbzYcuKEgs	UKO0Lkh4A-c	true
NqbzYcuKEgs	-qGLypXvU_8	true
NqbzYcuKEgs	Jxk7hTH54gE	true
NqbzYcuKEgs	iXFdmzAR7KA	true
NqbzYcuKEgs	0a2BXiKmm5k	true
NqbzYcuKEgs	2QV5lDKlkAY	true
NqbzYcuKEgs	IRo4iT9lNog	true
NqbzYcuKEgs	_5vxASC03bc	true
VIb2ix9MGgY	0x933-A5zfs	true
VIb2ix9MGgY	B_MsnZTHwSQ	true
VIb2ix9MGgY	iwjG2F0J8yc	true
VIb2ix9MGgY	qbi5EqgorBc	true
VIb2ix9MGgY	t-c7P9fORKY	true
VIb2ix9MGgY	F6q1Iyg9JIs	true
VIb2ix9MGgY	hwKzqppYRWk	true
VIb2ix9MGgY	-PL7_xOMMF0	true
VIb2ix9MGgY	szOmMUIenpM	true
VIb2ix9MGgY	hAZqusCpzQw	true
VIb2ix9MGgY	1wSDKt1edlQ	true
VIb2ix9MGgY	MSA7ItalCQk	true
VIb2ix9MGgY	xWV2ndHVPOw	true
VIb2ix9MGgY	Fm9XHoV5WgU	true
VIb2ix9MGgY	NqbzYcuKEgs	true
VIb2ix9MGgY	IN9kHSEM5z8	true
VIb2ix9MGgY	ZoYr9ef8320	true
VIb2ix9MGgY	5ymr8JwOcHw	true
VIb2ix9MGgY	IORKEU8oVFg	true
VIb2ix9MGgY	0UUWs5e8cB0	true
VIb2ix9MGgY	9-vdD-3-nA4	true
VIb2ix9MGgY	UM_mnIhHOXs	true
VIb2ix9MGgY	dhqxB-JGswc	true
VIb2ix9MGgY	U8iUGMthWT4	true
VIb2ix9MGgY	ghekXLxPwGE	true
VIb2ix9MGgY	zrmkS2YR2pE	true
VIb2ix9MGgY	fhhTHOHjg2k	true
VIb2ix9MGgY	4r_MsTUHmv0	true
VIb2ix9MGgY	qNjj1DdXPkk	true
VIb2ix9MGgY	Mv993WH6tp4	true
VIb2ix9MGgY	UV8HdWZL6ds	true
VIb2ix9MGgY	GBA92xU7l8M	true
VIb2ix9MGgY	F6QTTtC7cE0	true
VIb2ix9MGgY	9VAEqQNcRcA	true
VIb2ix9MGgY	E6IjllgpWdc	true
VIb2ix9MGgY	UKO0Lkh4A-c	true
VIb2ix9MGgY	LE_v0jL_dpk	true
VIb2ix9MGgY	FTQYa0_oyrg	true
VIb2ix9MGgY	rjkUrlKlNdY	true
VIb2ix9MGgY	ThziCUm7zgs	true
xWV2ndHVPOw	Cg-Vm6R5XNI	true
xWV2ndHVPOw	E4v2Om5GR6s	true
xWV2ndHVPOw	aaLAPAaxVuQ	true
xWV2ndHVPOw	NWvkpEg1TN0	true
xWV2ndHVPOw	Hvte3XpPceQ	true
xWV2ndHVPOw	2bVyfUTxhcY	true
xWV2ndHVPOw	IU0FHBDbOS0	true
xWV2ndHVPOw	cSG3-7IF4Gc	true
xWV2ndHVPOw	B_MsnZTHwSQ	true
xWV2ndHVPOw	8qkE4P2H5OY	true
xWV2ndHVPOw	2UKYd-vBV1I	true
xWV2ndHVPOw	thsBnZyUJns	true
xWV2ndHVPOw	nWWCFu7m9oM	true
xWV2ndHVPOw	FvXye0_Cwok	true
xWV2ndHVPOw	RUrjbWOuVhY	true
xWV2ndHVPOw	MSA7ItalCQk	true
xWV2ndHVPOw	iwjG2F0J8yc	true
xWV2ndHVPOw	TwTFfJbztWo	true
xWV2ndHVPOw	CiK7Gc4U4Ho	true
xWV2ndHVPOw	KoHm4I_epdQ	true
xWV2ndHVPOw	vzpbzjwlXTU	true
xWV2ndHVPOw	iEzesXm9Faw	true
xWV2ndHVPOw	3zTJlC8lAmY	true
xWV2ndHVPOw	eqw223qTO5Y	true
xWV2ndHVPOw	e-W52pEez20	true
xWV2ndHVPOw	UM_mnIhHOXs	true
xWV2ndHVPOw	DP-AqgJ6GMc	true
xWV2ndHVPOw	sIMkL5ZCx54	true
xWV2ndHVPOw	MeC4j-9DiS4	true
xWV2ndHVPOw	rv5HImuSutA	true
xWV2ndHVPOw	IN9kHSEM5z8	true
xWV2ndHVPOw	0UUWs5e8cB0	true
xWV2ndHVPOw	tJJ5n6NsFcU	true
xWV2ndHVPOw	VIb2ix9MGgY	true
xWV2ndHVPOw	ruQ0rLeSeVo	true
xWV2ndHVPOw	Z7z0_yt0Tmk	true
xWV2ndHVPOw	SCApZjL6i8w	true
xWV2ndHVPOw	f8Xa1zyU25I	true
xWV2ndHVPOw	IORKEU8oVFg	true
xWV2ndHVPOw	3SpiKe04erk	true
xWV2ndHVPOw	q6P4BtDfUxw	true
xWV2ndHVPOw	7Zk3aFiPWzk	true
xWV2ndHVPOw	-sLPjn8JMQQ	true
xWV2ndHVPOw	lyiVh0zuV-k	true
xWV2ndHVPOw	2B17yJiUFzc	true
xWV2ndHVPOw	ZXnYHcVmxqk	true
xWV2ndHVPOw	lGnonp8-iqU	true
xWV2ndHVPOw	NqbzYcuKEgs	true
xWV2ndHVPOw	g1de4DvszNU	true
xWV2ndHVPOw	OTm3Ww6bBRY	true
xWV2ndHVPOw	zrmkS2YR2pE	true
xWV2ndHVPOw	nSZ3KFPnuvo	true
xWV2ndHVPOw	4r_MsTUHmv0	true
xWV2ndHVPOw	QSSiZIifRLA	true
xWV2ndHVPOw	FTQYa0_oyrg	true
xWV2ndHVPOw	KgjYMGnV_ak	true
xWV2ndHVPOw	JNymX4Oad5A	true
xWV2ndHVPOw	T1ArUvap1NI	true
xWV2ndHVPOw	Pk_zpyjw0hg	true
Xe7Fk9Oydl8	JHYlMAGdcIE	true
Xe7Fk9Oydl8	uiTIAlJe4JE	true
Xe7Fk9Oydl8	Aox4-pLaOyA	true
Xe7Fk9Oydl8	X3LxwIDLwNg	true
Xe7Fk9Oydl8	ql0x_eY3DPQ	true
Xe7Fk9Oydl8	tL4QF9avDts	true
Xe7Fk9Oydl8	fKhz2YOjU7U	true
Xe7Fk9Oydl8	GlOaGXP1tPI	true
Xe7Fk9Oydl8	xMGVuUg_MJ4	true
Xe7Fk9Oydl8	nrz6pVyZcp0	true
Xe7Fk9Oydl8	cSG3-7IF4Gc	true
Xe7Fk9Oydl8	uybOwXoU6yU	true
Xe7Fk9Oydl8	NMF-26U0yOg	true
Xe7Fk9Oydl8	sqFOgtDzu7g	true
Xe7Fk9Oydl8	FOrZXG-6DG4	true
Xe7Fk9Oydl8	nT9Z4VsMLTg	true
Xe7Fk9Oydl8	nwUNkro2Oc4	true
Xe7Fk9Oydl8	SRM7eLrTEEc	true
Xe7Fk9Oydl8	VVgGNj-PRVU	true
Xe7Fk9Oydl8	5dijNX4HYz4	true
Xe7Fk9Oydl8	W6P88q72ero	true
Xe7Fk9Oydl8	cWiFBhX4ld8	true
Xe7Fk9Oydl8	FvXye0_Cwok	true
Xe7Fk9Oydl8	t30LZWZpfY0	true
Xe7Fk9Oydl8	HPvzpT_9Hhk	true
Xe7Fk9Oydl8	dohuRW3iBRg	true
Xe7Fk9Oydl8	NOB7WETZJ00	true
Xe7Fk9Oydl8	jYvsnY30t2w	true
Xe7Fk9Oydl8	II3imb_xVeM	true
Xe7Fk9Oydl8	ky6eCkeuksY	true
Xe7Fk9Oydl8	8jTEpEx9a_M	true
Xe7Fk9Oydl8	MiIZlSNAu0E	true
Xe7Fk9Oydl8	QSpPhj5HiWI	true
Xe7Fk9Oydl8	MiC6Oc0y7I4	true
Xe7Fk9Oydl8	UM_mnIhHOXs	true
Xe7Fk9Oydl8	LopjODuH_O8	true
Xe7Fk9Oydl8	VTG8o6TxOjk	true
Xe7Fk9Oydl8	RWiYOx5FV_E	true
Xe7Fk9Oydl8	aX5yDUtHY48	true
Xe7Fk9Oydl8	V0SeOi9ZWj4	true
Xe7Fk9Oydl8	o-rDqlq-q5s	true
Xe7Fk9Oydl8	fpQ5P5wVTWY	true
Xe7Fk9Oydl8	a3p5rGrotNc	true
Xe7Fk9Oydl8	m6XH3c1uz7M	true
Xe7Fk9Oydl8	PnF0X7gY4io	true
Xe7Fk9Oydl8	LzBWxm3BCCc	true
Xe7Fk9Oydl8	tcog3wvskek	true
Xe7Fk9Oydl8	ZfqwKtmzXkU	true
Xe7Fk9Oydl8	HZESKn92hno	true
Xe7Fk9Oydl8	9aGM1OrW2Is	true
Xe7Fk9Oydl8	duiI2RyeY4c	true
Xe7Fk9Oydl8	5TuBArbnPwU	true
Xe7Fk9Oydl8	LEmxXprE_sg	true
Xe7Fk9Oydl8	-3VyfFNAM8g	true
Xe7Fk9Oydl8	inkU5oHd750	true
Xe7Fk9Oydl8	M9vTSPBz034	true
Xe7Fk9Oydl8	HDWPA6RlV5c	true
QTvIYk3GQes	x9D807nQ2Bs	true
QTvIYk3GQes	RTXayn256VA	true
QTvIYk3GQes	bx9Z_jAaTEI	true
QTvIYk3GQes	LqgsTvOD3Ac	true
QTvIYk3GQes	2uDTvwA6S9c	true
QTvIYk3GQes	sqFOgtDzu7g	true
QTvIYk3GQes	_PCW9jbf_AU	true
QTvIYk3GQes	QD29yQloxHc	true
QTvIYk3GQes	tllSN0P6Epc	true
QTvIYk3GQes	JoI8NdsgeMc	true
QTvIYk3GQes	cRmJqRavNYI	true
QTvIYk3GQes	O7sJUe-Tda4	true
QTvIYk3GQes	-JwX1jVwj_s	true
QTvIYk3GQes	FvXye0_Cwok	true
QTvIYk3GQes	8jTEpEx9a_M	true
QTvIYk3GQes	xMGVuUg_MJ4	true
QTvIYk3GQes	5dijNX4HYz4	true
QTvIYk3GQes	q4fefy5szMA	true
QTvIYk3GQes	ENGdIpb_830	true
QTvIYk3GQes	NA6q7tVe814	true
QTvIYk3GQes	zEJpUV6M93c	true
QTvIYk3GQes	Xe7Fk9Oydl8	true
QTvIYk3GQes	U8iUGMthWT4	true
QTvIYk3GQes	p8iX1ch7QH4	true
QTvIYk3GQes	SRM7eLrTEEc	true
QTvIYk3GQes	m6XH3c1uz7M	true
QTvIYk3GQes	MeC4j-9DiS4	true
QTvIYk3GQes	JCuEwTsn-jQ	true
QTvIYk3GQes	nl0JhFXTgw0	true
QTvIYk3GQes	K-2D1vK7UCU	true
QTvIYk3GQes	xFZCZXckG60	true
QTvIYk3GQes	xWV2ndHVPOw	true
QTvIYk3GQes	MiIZlSNAu0E	true
QTvIYk3GQes	tcog3wvskek	true
QTvIYk3GQes	ibU743D6I0k	true
QTvIYk3GQes	6aDadkJMtTY	true
QTvIYk3GQes	Hl_hLlKEGsA	true
QTvIYk3GQes	HZESKn92hno	true
QTvIYk3GQes	vrKb_KO8lYw	true
QTvIYk3GQes	F2Mhpo9X1qE	true
QTvIYk3GQes	2LpRCkWdeU8	true
QTvIYk3GQes	hVpX38rGTss	true
QTvIYk3GQes	LjlCl1xnXts	true
QTvIYk3GQes	4r_MsTUHmv0	true
QTvIYk3GQes	bHx4h10n4TQ	true
QTvIYk3GQes	M52Decf4qJ0	true
QTvIYk3GQes	fF53D9Pteo0	true
QTvIYk3GQes	LE_v0jL_dpk	true
cFqsNYSPWVk	8jTEpEx9a_M	true
cFqsNYSPWVk	IJ-XIFNX3pI	true
cFqsNYSPWVk	sIMkL5ZCx54	true
cFqsNYSPWVk	sqFOgtDzu7g	true
cFqsNYSPWVk	xWV2ndHVPOw	true
cFqsNYSPWVk	5ymr8JwOcHw	true
cFqsNYSPWVk	nl0JhFXTgw0	true
cFqsNYSPWVk	1kp2M6pKqVk	true
cFqsNYSPWVk	NqbzYcuKEgs	true
cFqsNYSPWVk	vv5HLJVUEz8	true
cFqsNYSPWVk	U8iUGMthWT4	true
cFqsNYSPWVk	BBumt4RY9z8	true
cFqsNYSPWVk	3JgsA8yBijQ	true
cFqsNYSPWVk	W6P88q72ero	true
cFqsNYSPWVk	8yXrZNalMAU	true
cFqsNYSPWVk	2TUkO_KU--I	true
cFqsNYSPWVk	OARuMYmmuBo	true
cFqsNYSPWVk	4r_MsTUHmv0	true
cFqsNYSPWVk	UM_mnIhHOXs	true
cFqsNYSPWVk	HZESKn92hno	true
cFqsNYSPWVk	zrmkS2YR2pE	true
cFqsNYSPWVk	XkNDv8h_0UQ	true
cFqsNYSPWVk	rrwMjvUiqaY	true
cFqsNYSPWVk	AU6TygEsQaI	true
cFqsNYSPWVk	SETpQB-gbzo	true
cFqsNYSPWVk	E6IjllgpWdc	true
cFqsNYSPWVk	jZAqT-eAZd4	true
cFqsNYSPWVk	UKO0Lkh4A-c	true
cFqsNYSPWVk	9VAEqQNcRcA	true
cFqsNYSPWVk	2bVyfUTxhcY	true
cFqsNYSPWVk	Kq5LGBxPzPA	true
cFqsNYSPWVk	0N2rqAHsxcs	true
cFqsNYSPWVk	Jxk7hTH54gE	true
cFqsNYSPWVk	oUWswSgGs9I	true
cFqsNYSPWVk	LE_v0jL_dpk	true
cFqsNYSPWVk	jn_QgiJOf6M	true
cFqsNYSPWVk	eiFnWYDopXo	true
[truncated: 22,920 more rows]
