# Supplementary material
Source: publisher figshare collection journal article supplement (https://frontiersin.figshare.com/ndownloader/files/25261583)
Supplement: Supplementary file 5 [file 25261583 › yt_recommendation/data/01-initial_ytdt_query/query_2-videonet_search50_nodes2135_2020_02_10-19_36_36.gdf]

nodedef>name VARCHAR	label VARCHAR	isSeed VARCHAR	seedRank INT	publishedAt INT	channelTitle VARCHAR	channelId VARCHAR	videoCategoryLabel VARCHAR	viewCount INT	likeCount INT	dislikeCount INT	dislikeLikeRatio FLOAT	favoriteCount INT	commentCount INT
NqbzYcuKEgs	Vacina provoca autismo em crianças? Fraude no meio científico!	yes	1	1537387735	Universidade da Química	UCHyeOQ0-Td0Dv3xfI0dwu3g	Education	4068	225	56	0.24888888888889	0	70
VIb2ix9MGgY	VACINAS CAUSAM AUTISMO? Saiba a verdade!	yes	2	1533045602	CBI of Miami	UCuAaB8lLRmoZzOrc_d_Ka0A	Education	7597				0	231
xWV2ndHVPOw	Alumínio presente em vacinas causa autismo? | Drauzio News #26	yes	3	1557928809	Drauzio Varella	UC9zqTTVeClpqMQ5CLuJdWtw	Science & Technology	12757	1800	83	0.046111111111111	0	183
Xe7Fk9Oydl8	Pais decidem não vacinar os filhos por medo das reações que as vacinas podem provocar	yes	4	1505496847	Hoje em Dia	UCN-opsqqDunWO6h5uCp9Y4g	Entertainment	17734	229	47	0.20524017467249	0	407
QTvIYk3GQes	Vacina tríplice viral é suspensa no Amazonas após casos de reações adversas	yes	5	1416442052	tvbrasil	UCSv9d0kQegylHWpP83jWSQg	Entertainment	2906	41	3	0.073170731707317	0	10
cFqsNYSPWVk	Via Legal - Vacina Triplice	yes	6	1282923154	programaViaLegal	UCMMJm4lYxEh7GM4loYh6-SQ	Education	5902	44	4	0.090909090909091	0	46
sIMkL5ZCx54	AUTISMO E VACINAÇÃO - Novas pesquisas	yes	7	1554213453	CBI of Miami	UCuAaB8lLRmoZzOrc_d_Ka0A	Education	675				0	7
LPACovyBN_Y	As Vacinas Provocam Autismo?	yes	8	1574192447	Dicas do Salgueiro	UChsZDP7pW_08Sk6Tp4U8KJA	Comedy	2709	167	4	0.023952095808383	0	9
XG7VrYA17PA	Uma explicação de uma possível ligação das Vacinas ao Autismo	yes	9	1426268563	Vencer Autismo	UC8b-2BfQ-PpYKESOfEGhYBQ	Education	1726	37	1	0.027027027027027	0	8
ojbT_A-Ju2c	#AUTISMO - VACINAS??? DIETAS????	yes	10	1510504391	SegredosDaLaurinha	UCGILPX9AE6hZpqp1FjFn6pw	People & Blogs	1568	94	19	0.20212765957447	0
4r_MsTUHmv0	AUTISMO E VACINA! - 120segundos 13 | BláBláLogia #SemanaDaVacina	yes	11	1534243610	BláBláLogia	UC3Ooj_iDWELBumIEDejyNHQ	People & Blogs	8720	2131	19	0.008916001877053	0	90
VDalbTUtLDA	Saiba como as fake news atrapalham a vacinação contra o sarampo	yes	12	1566219026	RECORD TV	UCu_a6PAzp30Bn2mM-Ll09LA	News & Politics	7308	110	68	0.61818181818182	0	105
YAvL5WThX6w	Vacina do sarampo: a mãe que perdeu 2 filhos por acreditar em fake news	yes	13	1562608773	BBC News Brasil	UCthbIFAxbXTTQEC7EcQvP1Q	News & Politics	12104	998	39	0.039078156312625	0	225
IyIDvLr6_-c	Autismo e vacina SCR (Sarampo caxumba e rubéola)	yes	14	1560092890	Scio Education	UCyuDCBA1ig-x1YeAQBX2b4g	Education	194	7	4	0.57142857142857	0	4
JY0c-1Oibg4	Risco de contaminação deve ser maior que o de tomar vacina diz secretário	yes	15	1516383527	Jovem Pan News	UCP391YRAjSOdM_bwievgaZA	News & Politics	941	23	3	0.1304347826087	0	11
UM_mnIhHOXs	VACINAS FAZEM MAL? Nostalgia Ciência	yes	16	1545400804	Canal Nostalgia	UCH2VZQBLFTOp6I_qgnBJCuQ	Entertainment	1363152	230561	2996	0.01299439193966	0	7802
JzyEmI1Atwk	Baixa cobertura da vacina tríplice viral preocupa os órgãos de saúde!	yes	17	1565979362	PUC TV GOIÁS	UCBx_CluVFNvy0TXsmNBZ-ow	News & Politics	655	8	1	0.125	0	0
wbn_HdpQM5M	O AUTISMO ESTÁ AUMENTANDO ASSUSTADORAMENTE	yes	18	1522594850	Dr. Uronal Zancan	UCVqS-HRwe2vq_Jjgu4fg-UA	Education	12318	1342	30	0.022354694485842	0	196
fnPgNYcl3aY	Autismo alterações mentais lesões neurológicas e vacinas.	yes	19	1447248507	Elcio da Silveira Machado	UCtym0q5w1NeYqVjzSwRntgQ	Education	7393	159	3	0.018867924528302	0	22
2bVyfUTxhcY	Vacinas causam autismo? ( E outras informações importantes)	yes	20	1543257453	Criar e Crescer	UCgbbjw8zPkrmmL_XU1SgJBg	Education	2871	162	41	0.25308641975309	0	37
SETpQB-gbzo	VACINAS CAUSAM AUTISMO?	yes	21	1530798316	O Lado Bom do Mundo	UCnNvQI_yyWPZGI-rqFhR17Q	People & Blogs	434	57	10	0.17543859649123	0	7
E6IjllgpWdc	Vacinar ou não vacinar? Eis a questão! | Fafá Conta	yes	22	1535507430	Fafá conta histórias	UC9fxSdFjcz5QWDEhYCk_k1w	Entertainment	3150	161	24	0.14906832298137	0	25
26FTxfjfjgQ	50 Dúvidas sobre Vacinas + Vacinas para Viagens e Mitos/Verdades sobre Vacinação	yes	23	1561072068	Celso Cavallini	UCl1eRuftjRdetdWkrbeDBGg	Education	8067	1068	51	0.047752808988764	0	45
LE_v0jL_dpk	Médico suspeita que vacina contra o Sarampo pode causar autismo	yes	24	1498423594	ESCUDO pt	UCvLNnnIZdqXYqAS-l8FLJFw	News & Politics	3229	66	7	0.10606060606061	0	24
rXujENBvLoI	VACINAS e sua relação com Autismo	yes	25	1553342412	Juntando as Peças do Autismo	UCf9lX9Vc4CWBUKQxVfZ6MtQ	People & Blogs	517	39	2	0.051282051282051	0	3
U8iUGMthWT4	Esclareça dúvidas sobre a vacina de sarampo	yes	26	1532631601	Ver Mais Londrina	UCGfBE94turq_hyKMxB-Dfrg	People & Blogs	23285	353	33	0.093484419263456	0
uILPKgJp7KU	Espaço Saúde | Vacinas: mitos e Verdades	yes	27	1546886113	Confederação Nacional do Comércio de Bens Serviços e Turismo	UC-4ddcVkyrXXbBqedYV4l9Q	Nonprofits & Activism	873	27	5	0.18518518518519	0	0
IU0FHBDbOS0	Mentira 8 - Conheça 8 mentiras sobre a vacinação	yes	28	1565650259	Ministério da Saúde	UC12zKGLhMhDeDidoctM6BrA	Nonprofits & Activism	664	12	17	1.4166666666667	0	14
iXFdmzAR7KA	Vacinas Podem Causar Autismo? Elas contém Mercúrio?| Lenda ou Fato	yes	29	1495720806	Canal do Schwarza	UCWq1xltHB2fDe6YkYoOrryg	Entertainment	29847	4762	201	0.042209155816884	0	323
vv5HLJVUEz8	Rede antivacina no Brasil traz conspirações dos EUA e cresce com sistema de recomendação do YouTube	yes	30	1561582240	BBC News Brasil	UCthbIFAxbXTTQEC7EcQvP1Q	News & Politics	6031	401	101	0.25187032418953	0	122
aAa_mpeHdbU	Vacina contra Sarampo | Dra Ana Escobar	yes	31	1531945331	Dra Ana Escobar	UCKtJs_zI1yzswHDWqkqHtWw	Education	2443	139	2	0.014388489208633	0	9
nCy5_kUXdeI	Sarampo: Ministério da Saúde envia vacinas para o Norte	yes	32	1530930897	Band Jornalismo	UCoa-D_VfMkFrCYodrOC9-mA	News & Politics	1037	25	3	0.12	0	2
9VAEqQNcRcA	A NOVA REVOLTA DA VACINA - VACINAS NÃO MATAM OLAVO MENTIU	yes	33	1543958100	O Historiador	UC5ZXYxeWlROKbL7JziJ0bIQ	People & Blogs	10329	1794	133	0.074136008918618	0	227
8nMikezRkKw	Documentário sobre a relação Vacina - Autismo	yes	34	1528334656	Andre Chilano	UC-v1PJRoid6DGFzY1jVU3hg	People & Blogs	136	11	0	0	0	0
GTpFmUxvltQ	Vacina contra o sarampo	yes	35	1532105993	UFLA	UCz54U1Ts7JR7ZtSiClcVOOw	Education	2834	30	1	0.033333333333333	0	4
dohuRW3iBRg	VOCÊ DEVE TOMAR A VACINA DA FEBRE AMARELA?	yes	36	1517493438	Dr. Lair Ribeiro Oficial	UCk9mgpQVdJ5oKQWkM1UPBaQ	Entertainment	58878	4339	107	0.024660059921641	0	370
UKO0Lkh4A-c	Detectada Possível Causa do Autismo e Surpresa: Não são as Vacinas | Lenda ou Fato (Hoje é Fato)	yes	37	1533244122	Canal do Schwarza	UCWq1xltHB2fDe6YkYoOrryg	Entertainment	22623	4056	246	0.060650887573964	0	301
gsrNp8MDSoY	Papo Saúde - Verdades e mentiras sobre vacinação.	yes	38	1561406020	Ministério da Saúde	UC12zKGLhMhDeDidoctM6BrA	Nonprofits & Activism	743	38	0	0	0	2
vIfJbB43Ca4	VACINAS MMS E AUTISMO	yes	39	1569963607	CBI of Miami	UCuAaB8lLRmoZzOrc_d_Ka0A	Education	450				0	4
MOXXNX3oQVA	Sarampo avança e SP vai levar vacinas para escolas	yes	40	1563877760	Jovem Pan News	UCP391YRAjSOdM_bwievgaZA	News & Politics	507	17	2	0.11764705882353	0	7
hUvHKz3ugOg	Vacinas valem a pena? (#Pirula 78.1)	yes	41	1398949205	Canal do Pirulla	UCdGpd0gNn38UKwoncZd9rmA	Science & Technology	208147	16993	370	0.021773671511799	0	1234
xFZCZXckG60	Dúvidas sobre a Vacina contra Sarampo | Dra Ana Escobar	yes	42	1532617668	Dra Ana Escobar	UCKtJs_zI1yzswHDWqkqHtWw	Education	105977	206	6	0.029126213592233	0	18
y6FGSQMRSc8	Vacina causa autismo? #DuvidaAleatoria	yes	43	1551565012	Momento Aleatório	UC5o3Raq_jrrSFZ5rkC8uBvw	Entertainment	171	8	3	0.375	0	3
MiIZlSNAu0E	EXISTE PERIGO NA VACINA? | Nerdologia	yes	44	1398951771	Nerdologia	UClu474HMt895mVxZdlIHXEA	Science & Technology	588497	59086	945	0.015993636394408	0	3707
dwUn4OrfovQ	Ministério da Saúde anuncia vacinação contra paralisia	yes	45	1533082917	Band Jornalismo	UCoa-D_VfMkFrCYodrOC9-mA	News & Politics	306	10	0	0	0	1
vrKb_KO8lYw	Saiba mais sobre a vacina contra o Sarampo	yes	46	1393358796	Unimed Fortaleza	UCUtDAMp91VCfHTZ9_ypKRPA	People & Blogs	5839	57	5	0.087719298245614	0	3
GlQBtRqBHXw	Desmistificando as vacinas	yes	47	1533740403	Nunca vi 1 cientista	UCdKJlY5eAoSumIlcOcYxIGg	People & Blogs	796	165	6	0.036363636363636	0	12
sQCExa2l5G4	“Vacina homeopática” é investigada	yes	48	1517435164	Jornal da Gazeta	UCNl_i-ggJbZNyOLlhE7yyhw	News & Politics	694	7	2	0.28571428571429	0	1
XkNDv8h_0UQ	Vacina da Gripe? Morte do rim e Neurotoxidade Aguda x Autismo	yes	49	1526663422	Viver com Saúde e Atitude	UCa1o8yRux22rDwRbEjokSPg	People & Blogs	9996	471	16	0.033970276008493	0	32
j5IZK29WFRs	Vacina causa autismo? | Leonardo Guimarães	yes	50	1563981868	Leonardo Guimarães	UCWo6OpatSyHZijRG_MwObFA	People & Blogs	127	15	0	0	0	5
0dDMLSo93kQ	Você sabe como funciona o teste de gravidez?	no		1541865600	Universidade da Química	UCHyeOQ0-Td0Dv3xfI0dwu3g	Education	1373	239	0	0	0	17
TyYDHDe04fg	Cerveja contaminada com Dietilenoglicol leva a óbito . O que é Dietilenoglicol?	no		1578849926	Universidade da Química	UCHyeOQ0-Td0Dv3xfI0dwu3g	Education	29285	2504	49	0.019568690095847	0	180
B_MsnZTHwSQ	Como diagnosticar o autismo na infância | José Salomão Schwartzman	no		1499349601	Drauzio Varella	UC9zqTTVeClpqMQ5CLuJdWtw	Science & Technology	462622	17691	377	0.021310270759143	0	421
jlLALSvdfdc	Os melhores livros para aprender química em 2020 (saindo da média)	no		1577972377	Universidade da Química	UCHyeOQ0-Td0Dv3xfI0dwu3g	Education	4604	914	0	0	0	114
8fsHiYFuaAk	Hacia un nuevo tratamiento del autismo mediante la investigación genética y el escáner... - science	no		1372184922	euronews (en español)	UCyoGb3SMlTlB8CLGVH4c8Rw	Science & Technology	41260	284	12	0.042253521126761	0	26
YLsSy6P9_64	Há alguma relação entre Química e Literatura?	no		1579555273	Universidade da Química	UCHyeOQ0-Td0Dv3xfI0dwu3g	Education	1074	232	2	0.0086206896551724	0	32
fvcfwEyvAqE	Sangue Drácula da Netflix e Química	no		1578242301	Universidade da Química	UCHyeOQ0-Td0Dv3xfI0dwu3g	Education	1518	317	2	0.0063091482649842	0	30
3sERJkRTA6E	Dr Stone - Descobrindo a Pólvora (Episódio 4)	no		1579377360	Universidade da Química	UCHyeOQ0-Td0Dv3xfI0dwu3g	Education	1530	336	1	0.0029761904761905	0	34
AZ6-hDi-mn8	Desafio Químico #3 Compostos de Coordenação (Complexos)	no		1580994000	Universidade da Química	UCHyeOQ0-Td0Dv3xfI0dwu3g	Education	580	113	0	0	0	20
QYpd_kHcIXQ	Hataraku Saibou / Cells at Work - A Intoxicação Alimentar (Ep. 4)	no		1579972925	Universidade da Química	UCHyeOQ0-Td0Dv3xfI0dwu3g	Education	814	185	1	0.0054054054054054	0	22
03r6cYgVoEY	Quais são as causas do autismo? Prof. Dr. Lucelmo Laccerda	no		1554073408	Luna ABA	UCk0U1Js-um2lRjSF3VoS_3A	Education	12153	951	10	0.010515247108307	0	67
ZxgpbRkVu_Q	Reflexões Químicas - Como se monta um Diagrama de Orbitais Moleculares (Divergência entre livros ...	no		1581275111	Universidade da Química	UCHyeOQ0-Td0Dv3xfI0dwu3g	Education	1120	255	1	0.003921568627451	0	20
SCApZjL6i8w	Mitos e Verdades: Vacinação Contra o Influenza - Você Bonita (23/04/18)	no		1524511179	Você Bonita	UCxucJ9P3mLMneYypLZYn2uw	Howto & Style	19677	477	30	0.062893081761006	0	51
cjcadq89B9Q	Vacinação contra a gripe - Depoimento Lauana	no		1554909037	Ministério da Saúde	UC12zKGLhMhDeDidoctM6BrA	Nonprofits & Activism	4675	43	4	0.093023255813953	0	10
5ymr8JwOcHw	Dr Lair Ribeiro | AFINAL: QUEM pode ou não pode tomar a VACINA contra a FeBRe AMARELA?	no		1517706300	Junior Hallak Medicina e Saúde	UCPR3gVNYBzi-02_O4noC1Zg	People & Blogs	31223	2049	28	0.013665202537823	0	100
LBXSCVjFyKY	Vacinação contra gripe 2019 - Depoimento Cláudio	no		1554909037	Ministério da Saúde	UC12zKGLhMhDeDidoctM6BrA	Nonprofits & Activism	7731	61	20	0.32786885245902	0	8
qz7hG2IHJC8	Vacinação versus Movimento Anti-Vacina | bloco 2 | Realidade em Pauta	no		1533247202	Revista Novo Tempo	UCcoPc-BqFPkVkkwyS35J-ng	News & Politics	2876				0	1
MSA7ItalCQk	Ação das vacinas no corpo humano	no		1553287556	Khan Academy Brasil	UCXj2oSzwg6G0iBjKg33joMQ	Education	38816	1159	89	0.07679033649698	0	183
clP6AmsREjQ	Dr. Sproesser tira dúvidas sobre vacina prevenção e tratamento da gripe	no		1522857342	Hoje em Dia	UCN-opsqqDunWO6h5uCp9Y4g	Entertainment	13657	293	48	0.16382252559727	0	27
hDOGX9eZIRE	Dr Stone - Ruptura ideológica (Episódio 3)	no		1577460118	Universidade da Química	UCHyeOQ0-Td0Dv3xfI0dwu3g	Education	1547	280	0	0	0	22
IORKEU8oVFg	Posso me VACINAR contra a GRIPE? | Prof. Paulo Jubilut	no		1525384801	Biologia Total com Prof. Jubilut	UCG-eghyORxNrzSG8FkAWKyw	Education	46046	3706	155	0.041824069077172	0	326
-emUlUIcKZE	ELA TEVE QUE TOMAR TRÊS VACINAS!!!!!	no		1554833687	Familia Jones	UC3PLVO-mt6ZQLiySKdJedCA	Entertainment	420288	32768	347	0.010589599609375	0
l0FyS1T5nrk	Fábrica de vacina contra gripe produz mais de 60 milhões de doses	no		1507093596	Jornal da Record	UCmpHPgeCBgvk_fDXZQKsnAA	News & Politics	860	21	3	0.14285714285714	0	8
q6P4BtDfUxw	Vacinar os filhos é obrigação | Andrea Rosana Silva | Cabine #16	no		1535565606	Drauzio Varella	UC9zqTTVeClpqMQ5CLuJdWtw	Science & Technology	11975	1635	40	0.024464831804281	0	114
HGyLTOS4WgM	10 conceitos de química que te ensinaram errado #UdQLista	no		1546541913	Universidade da Química	UCHyeOQ0-Td0Dv3xfI0dwu3g	Education	12187	1521	7	0.0046022353714661	0	93
AU6TygEsQaI	🔴 YAKULT FAZ BEM??? E O Mais Potente Anti-Inflamatório Do Mundo!!! Dr. Lair Ribeiro Responde	no		1546696999	SAÚDE & BEM ESTAR	UCe1XNXkGImWSq5n4wkzNjBw	People & Blogs	988014	51220	711	0.013881296368606	0	1617
D4v14-KUnws	Tenho GASTRITE E QUEIMAÇÃO Água Com Limão Resolve??? Dr. Lair Ribeiro Responde	no		1548537917	SAÚDE & BEM ESTAR	UCe1XNXkGImWSq5n4wkzNjBw	People & Blogs	196594	10068	131	0.013011521652761	0	598
zrmkS2YR2pE	NÃO TOME A VACINA DA FEBRE AMARELA / PREVENÇÃO DA DOENÇA	no		1521151019	Odilon Cardoso de Farias	UC0LDNBjI8prPXedEj3QosOQ	Howto & Style	3990	358	13	0.036312849162011	0	22
hwKzqppYRWk	10 DICAS PARA O TRATAMENTO DO AUTISMO	no		1537279015	CBI of Miami	UCuAaB8lLRmoZzOrc_d_Ka0A	Education	8281				0	39
OARuMYmmuBo	A vacina da gripe pode matar?	no		1524160679	Ministério da Saúde	UC12zKGLhMhDeDidoctM6BrA	Nonprofits & Activism	9418	73	40	0.54794520547945	0	1
4rp2o0IeP5w	Efeitos deletérios do mercúrio no organismo	no		1512137123	Dra. Andreia Torres	UC81fUuO3oGR-ju7tEAuyNPA	Education	22803	771	15	0.019455252918288	0	114
X1gBFYCBdJk	Vacinar ou Não contra HPV? | Dr. Dayan Siebra	no		1515073811	Dr. Dayan Siebra	UClN6OLbLp1YjTSwDOkEM2dA	Entertainment	42209	4918	60	0.012200081333876	0	315
L-8N_N5RhMI	VÍRUS DA GRIPE!!! SAIBA COMO CURAR!!! E O Sistema Imunológico!!! (Lair Ribeiro)	no		1513429174	SAÚDE & BEM ESTAR	UCe1XNXkGImWSq5n4wkzNjBw	People & Blogs	394354	19701	388	0.019694431754733	0	505
7oMeOdqXmDY	Vacina HPV Infertilidade! ! ! ! ! ! ! E o que mais?	no		1396716456	Jumosan1	UCF_C2UbEzxoCn1mu6AltgvA	Education	1590	35	2	0.057142857142857	0	9
0N2rqAHsxcs	🔴 Conheça A VACINA CONTRA O CÂNCER!!! E A Dieta Da Sua Cura!!! Lair Ribeiro Responde	no		1545482682	SAÚDE & BEM ESTAR	UCe1XNXkGImWSq5n4wkzNjBw	People & Blogs	12978	1198	12	0.010016694490818	0	50
yh55lh0qKLo	Alerta sobre uso de mercúrio em vacinas - Palestra Mercúrio Zero	no		1387187030	Mônica Nóbrega	UCJJMzrEvAsnrfx8ur7DisQw	Entertainment	1517	28	1	0.035714285714286	0	5
GCPRAiGLPaQ	LUTO do autismo - da NEGAÇÃO até a ACEITAÇÃO	no		1523025001	Mamãe Tagarela	UCz1xVDltULzUhZCJ1TkvnTQ	People & Blogs	13218	1206	9	0.0074626865671642	0	133
lADFsGGPDSo	Efeito da vacina contra o HPV pode ser mais amplo do que se pensava | Fernando Maluf	no		1504272023	Jovem Pan News	UCP391YRAjSOdM_bwievgaZA	News & Politics	5721	102	43	0.42156862745098	0	81
gcBLVSnNeH4	Autismo - Como o Lucas falou em 1 semana	no		1532356412	Ação Autismo	UCF8Uaj9cnSkL-63NSPnBVCQ	Education	64284	5933	44	0.0074161469745491	0	236
nQPv6FKymnc	Microcefalia foi causada por vacinas contra rubéola? - Será que é verdade? #3	no		1457720352	ClickCiência UFSCar	UC9GFu08xsidnYq_qiJlTcug	Science & Technology	492	8	4	0.5	0	2
HZESKn92hno	Mães não querem vacinar os filhos por medo de efeitos colaterais	no		1496169127	Balanço Geral	UCqZN-NqgP7bhbctbyThSVUA	News & Politics	4082	74	22	0.2972972972973	0	89
T1ArUvap1NI	Quem pode e quem não pode tomar a vacina contra a febre amarela? Dr. Lair Ribeiro	no		1517431470	O NATURAL É MELHOR	UCwQhAc44SfDvhdCQiHluBVQ	People & Blogs	44107	1199	43	0.035863219349458	0	59
YpK034AryWw	REALMENTE tem MERCÚRIO na vacina da FEBRE AMARELA afirma cientistas da USP	no		1519276155	A farmácia de Deus com Lisa Santos	UCstv_dyLeuAbDB8ISTfkFbQ	People & Blogs	1808	158	9	0.056962025316456	0	29
zgUqVaPgnEE	Naturólogo Júnior Dr saúde em Alto Araguaia/MT	no		1507089447	Carlos André Andredafm	UCj7tzC9HCCUnkROYJocRzYA	People & Blogs	2999	86	3	0.034883720930233	0	0
x6cGx2pArbE	Os idiotas do movimento anti-vacina crescem a cada dia	no		1495895992	Ceticismo.net	UChkPByjtZumJrJmtqkiw5Jg	People & Blogs	5227	397	62	0.15617128463476	0	164
XvUyPRgHcY8	Vacinação infantil e autismo: Existe alguma relação?	no		1541427996	CCATES	UCmV27tf2iqUZDDtXiShSKUg	Science & Technology	165	5	4	0.8	0	0
0a2BXiKmm5k	Dr Lair fez o teste do celular veja no que deu.	no		1527317197	U MIÓ QUE TÁ TENO	UC4F32QLrpDmmRrozxr9z59g	Science & Technology	431220	21209	625	0.029468621811495	0	1061
_5vxASC03bc	De Onde Surge o Câncer? | Dr Lair Ribeiro	no		1542773317	U MIÓ QUE TÁ TENO	UC4F32QLrpDmmRrozxr9z59g	Science & Technology	547250	31526	557	0.017667956607245	0	1833
IRo4iT9lNog	Médico Dr. Lair Ribeiro Denuncia a Indústria Farmacêutica	no		1501342462	Jorge S	UCv3JgOy__M8B3xsa5adWR6g	People & Blogs	8551	357	8	0.022408963585434	0	29
Jxk7hTH54gE	ALERTA! O PERIGO DA VACINA PARA FEBRE AMARELA LAIR RIBEIRO	no		1517432429	RECEITAS E DICAS DE SAÚDE	UCuqsl-IppoFW0uNPQfbXAVg	Entertainment	3345	97	10	0.10309278350515	0	4
-qGLypXvU_8	Autismo e o Gluten Dr Lair Ribeiro	no		1444228006	O Melhor Para Você	UCVPdtCCsEsem4hyVwS_GzOQ	People & Blogs	22355	678	12	0.017699115044248	0	11
2QV5lDKlkAY	Tratamento Extaordinário Para Pressão Alta Dr Lair Ribeiro	no		1550342439	O Melhor Para Você	UCVPdtCCsEsem4hyVwS_GzOQ	People & Blogs	23529	2063	21	0.010179350460494	0	100
M4YEOkgncrw	Vacinas são boas? O perigo do mercúrio!	no		1537670076	Rafael Guerra	UCj0_I61NA_sCFI2JW4QdOCQ	People & Blogs	580	60	3	0.05	0	3
w6DduVyJjso	Crianças QUE NÃO LEVAM A VACINA NÃO TÊM AUTISMO	no		1531822742	Atalaia De Yeshua	UC3vZWDAhX5356m17Vy1B2GA	People & Blogs	1245	140	6	0.042857142857143	0	28
0x933-A5zfs	AUTISMO: POR QUE OS MÉDICOS NÃO FECHAM DIAGNÓSTICO?	no		1535033169	CBI of Miami	UCuAaB8lLRmoZzOrc_d_Ka0A	Education	11337				0	83
qbi5EqgorBc	Menino brasileiro que nasceu autista surpreende ao falar só em inglês	no		1486346577	Domingo Espetacular	UCP-Vg2PcmLiWpEdvMI1R35w	Entertainment	7460958	163034	4057	0.024884379945287	0	10895
iwjG2F0J8yc	Vacinação Saúde Pública e Liberdade de Escolha	no		1533239398	Biologia Total com Prof. Jubilut	UCG-eghyORxNrzSG8FkAWKyw	Education	62666	5687	91	0.016001406717074	0	291
6i6v9f_aWjg	A Revolta da Vacina	no		1509386068	TV Senado	UCLgti7NuK0RuW9wty-fxPjQ	Education	125675	4166	56	0.013442150744119	0	64
t-c7P9fORKY	DICAS INTERESSANTES SOBRE DIREITOS DAS PESSOAS COM DEFICIÊNCIA	no		1579035610	CBI of Miami	UCuAaB8lLRmoZzOrc_d_Ka0A	Education	103				0	0
aRwMKUdnOBI	QUAIS SÃO OS SINAIS DE AUTISMO AOS 6 MESES?	no		1533650302	CBI of Miami	UCuAaB8lLRmoZzOrc_d_Ka0A	Education	9282				0	24
1wSDKt1edlQ	RISPERIDONA NO TRANSTORNO DESAFIADOR OPOSITIVO?	no		1534255444	CBI of Miami	UCuAaB8lLRmoZzOrc_d_Ka0A	Education	34911				0	117
8xD_4rYZ6CM	AUTISMO: Gestação e Vitaminas!	no		1554818430	CBI of Miami	UCuAaB8lLRmoZzOrc_d_Ka0A	Education	644				0	4
NGNrrMMr8vc	O QUE É DIETA SENSORIAL?	no		1536847032	CBI of Miami	UCuAaB8lLRmoZzOrc_d_Ka0A	Education	4145				0	10
9qpkXVa_BJE	DIETA PARA TRATAMENTO DO AUTISMO FUNCIONA?	no		1534860181	CBI of Miami	UCuAaB8lLRmoZzOrc_d_Ka0A	Education	11218				0	70
2n4vqQbQMao	AUTISMO: SINAIS AOS 12 MESES?	no		1539093631	CBI of Miami	UCuAaB8lLRmoZzOrc_d_Ka0A	Education	2279				0	15
-PL7_xOMMF0	DICAS PARA MELHORAR O REPERTÓRIO VERBAL DA CRIANÇA	no		1579640401	CBI of Miami	UCuAaB8lLRmoZzOrc_d_Ka0A	Education	163				0	0
hAZqusCpzQw	Por que estamos tendo um SURTO de SARAMPO?	no		1531421379	Biologia Total com Prof. Jubilut	UCG-eghyORxNrzSG8FkAWKyw	Education	104367	14088	83	0.0058915388983532	0	468
F6q1Iyg9JIs	COMO ESTIMULAR CRIANÇAS SEM BRINQUEDOS E JOGOS	no		1575406804	CBI of Miami	UCuAaB8lLRmoZzOrc_d_Ka0A	Education	271				0	0
oH7uoZHl88k	A CURA DO AUTISMO EXISTE?	no		1561471159	CBI of Miami	UCuAaB8lLRmoZzOrc_d_Ka0A	Education	661				0	18
ZoYr9ef8320	O Olhar do Autista	no		1409194446	Cachalote Documentários	UCykUsChWx0cy2ZRn3r0s5qQ	Film & Animation	86167	1867	46	0.024638457418318	0	60
h3Sc-EbhuzI	DICAS NA TERAPIA COGNITIVO COMPORTAMENTAL	no		1571778008	CBI of Miami	UCuAaB8lLRmoZzOrc_d_Ka0A	Education	355				0	2
iF7uuaa0hPM	S.O.S. MÃES DO AUTISMO	no		1537451850	CBI of Miami	UCuAaB8lLRmoZzOrc_d_Ka0A	Education	3890				0	34
Fm9XHoV5WgU	DICAS PARA UMA GESTAÇÃO SAUDÁVEL	no		1576011602	CBI of Miami	UCuAaB8lLRmoZzOrc_d_Ka0A	Education	77				0	1
IN9kHSEM5z8	Movimento contra vacinação afeta a saúde pública - Conexão - Canal Futura	no		1499445936	Conexão Futura	UCxt_nr6Xwbq4O2Ur9ZBpgAA	People & Blogs	9923	242	76	0.31404958677686	0	171
n7BKEtjZ9Dc	3 DICAS NO PROCESSO DE APRENDIZADO	no		1571173208	CBI of Miami	UCuAaB8lLRmoZzOrc_d_Ka0A	Education	263				0	1
MoIzJeKfzys	O QUE É A INTERVENÇÃO ABA?	no		1533823389	CBI of Miami	UCuAaB8lLRmoZzOrc_d_Ka0A	Education	6393				0	18
piJPHT7J3h4	MÃE GELADEIRA CAUSA AUTISMO?	no		1539871205	CBI of Miami	UCuAaB8lLRmoZzOrc_d_Ka0A	Education	1841				0	19
5n2KOaxgHPA	O QUE É ENRIQUECIMENTO DO AMBIENTE NO AUTISMO?	no		1535464234	CBI of Miami	UCuAaB8lLRmoZzOrc_d_Ka0A	Education	4273				0	28
9-vdD-3-nA4	15 SINAIS de AUTISMO LEVE I MARIA CLAUDIA BRITO	no		1533083243	Dra Maria Claudia Brito	UCFbx6QBTcDI6toOnO-EyajQ	People & Blogs	1916927	82862	2190	0.026429485168111	0	3507
0UUWs5e8cB0	VACINOSE : Doença secundária à Vacina / Dr. Lair Ribeiro	no		1517505267	Junior Hallak Medicina e Saúde	UCPR3gVNYBzi-02_O4noC1Zg	People & Blogs	25452	1235	29	0.023481781376518	0	93
szOmMUIenpM	Transtornos depressivos - Módulo de Psiquiatria - Aula SanarFlix	no		1529420411	Medicina Resumida	UCE0KRm8m9_ki8MrMYGyjpAw	Education	17253	674	9	0.013353115727003	0	18
dhqxB-JGswc	Aula Sobre Vacinas - O que você precisa saber?	no		1524611201	Banguela Reversa	UCR9EXU15wObpFMDyQmHXeuw	Education	6171	256	8	0.03125	0	15
Mv993WH6tp4	Onde vacinar? No posto ou na Clínica? - por Evandro Salgado	no		1513382893	Dr. Evandro Salgado	UC7m35AnSXe8aSsBWRCPEQ1g	People & Blogs	2167	298	3	0.01006711409396	0	15
IYFmPZXnGQA	As principais comorbidades presentes no autismo	no		1524709061	Academia do Autismo	UCHwQqfFkSlJXCgbjA1DJcKw	People & Blogs	7502	829	7	0.0084439083232811	0	16
qi4MsCIutrU	DICAS PARA PAIS E PROFESSORES	no		1580245213	CBI of Miami	UCuAaB8lLRmoZzOrc_d_Ka0A	Education	121				0	1
DAEEygJatNA	5 mitos ou verdades sobre vacina - #V ou F	no		1441136292	Superinteressante	UCVVIVc6DfU8uWJ60vk8iKpQ	People & Blogs	2353	101	2	0.01980198019802	0	2
fhhTHOHjg2k	Qual a Diferença das Vacinas dos Posto de Saúde e das Clínicas Particulares	no		1520763880	APAIXONADA MATERNIDADE	UCyjo9Vr-Okmq7OHYyEQHGTQ	People & Blogs	2846	88	4	0.045454545454545	0	7
ghekXLxPwGE	Existe vacina contra o câncer?	no		1519842149	Olá Ciência!	UCrSM1UV_KLAdTzgxyxl3POw	Science & Technology	2082	283	0	0	0	30
qNjj1DdXPkk	FUNGOS & AUTISMO	no		1513548227	Dra Tielle Machado	UC4_WOkaSB6TMFad-v0T6qmg	People & Blogs	8466	594	11	0.018518518518519	0	34
GBA92xU7l8M	Qual deve ser a alimentação dos autistas? | Dr. Juliano Pimentel	no		1486029053	Dr Juliano Pimentel	UCPGGSQfN8LREy6dWdk85fpw	People & Blogs	74242	4196	108	0.025738798856053	0	137
F6QTTtC7cE0	AUTISMO - CURA x SAIR DO ESPECTRO	no		1533223606	Autistologos Autismo	UC2mdv67uDPQO35IYkzK_Xzw	Education	7996	424	7	0.016509433962264	0	48
UV8HdWZL6ds	Problemas de memória. Psiquiatra explica as causas.	no		1534550766	Ismael Sobrinho	UCXogxn8ApsdqeXyIDvBWOzg	People & Blogs	10559	1286	12	0.0093312597200622	0
UfMkJGdljxY	Vacina da Gripe Aumenta Abrotos Espontâneo: Prof Afonso	no		1570831120	Papa Capim de Fibra	UCBgDfWeylq5S_4yBpgg0rKA	Entertainment	530	54	1	0.018518518518519	0	1
YgfvZANuKHY	AUTISMO NO JAPÃO! ENTREVISTA COM VALERIA AOYAMA	no		1521453634	seligajapa	UCsCeWWW8sk8zDaPzw6Ll67g	People & Blogs	3059	152	7	0.046052631578947	0	29
FTQYa0_oyrg	139 Vacinas Porcarias e as Doenças Autoimunes	no		1527165857	Bruno S. Alves	UCquENngBYGYpHYtN0OVYLKQ	People & Blogs	1723	137	8	0.058394160583942	0	18
l742m53s-ow	Dr. Gustavo Teixeira CBI of Miami sobre Autistologos	no		1532187970	Autistologos Autismo	UC2mdv67uDPQO35IYkzK_Xzw	Education	485	43	0	0	0	4
rjkUrlKlNdY	Sarampo Pólio e a epidemia de BURRICE	no		1531308389	Professores do Brasil - Prof. Sergio Oliveira	UCvsvFTlOWSFU_RBinLDU7Ow	Education	940	33	31	0.93939393939394	0	17
ThziCUm7zgs	Por que nascem crianças autistas?	no		1498093668	Vinicius Alves	UCrtNrQTDykcrtfYMkggmV5g	People & Blogs	8638	235	9	0.038297872340426	0	6
0Y7FBVns0aM	Explicação científica da vacina tomar ou não?; Imposição das mãos- sério risco!	no		1518532010	Suely Freitas-Terapeuta Bioenergética	UCIksRr4M8kOqxUTyYDSwy4A	Nonprofits & Activism	1582	213	1	0.0046948356807512	0	26
oUWswSgGs9I	Vacinação e Autismo	no		1522703627	Pediatria Do Estilo de Vida	UC1_-z9fMYofIUQWYUPoNyTw	People & Blogs	455	18	10	0.55555555555556	0	10
EkU3iU-MUSw	VACINAS #3 Como as vacinas funcionam? A importância de se vacinar!	no		1501707600	Referenciando	UCIu-GZ6a7B-IMyUs1rD629w	Science & Technology	232	18	0	0	0	0
snEknNLtd8k	VACINAS–ATENÇÃO MUNA–SE DE INFORMAÇÃO	no		1463494121	Verdades Ocultas e Inconvenientes!	UCsAMQ6_-iRdEWBVh8q-IXmA	People & Blogs	5500	181	4	0.022099447513812	0	16
Cg-Vm6R5XNI	Movimento antivacina é criminoso diz Drauzio Varella	no		1561573310	BBC News Brasil	UCthbIFAxbXTTQEC7EcQvP1Q	News & Politics	45031	3565	265	0.074333800841515	0	1075
aaLAPAaxVuQ	Autismo e desenhos	no		1580997601	Drauzio Varella	UC9zqTTVeClpqMQ5CLuJdWtw	Science & Technology	8456	1172	10	0.0085324232081911	0	27
E4v2Om5GR6s	CELULAR dá câncer? Ft. DRAUZIO VARELLA 🔵Manual do Mundo	no		1476362008	Manual do Mundo	UCKHhA5hN2UohhFDfNXB_cvQ	Science & Technology	1033622	82039	1623	0.019783273808798	0	3913
NWvkpEg1TN0	Sintomas da dengue | Coluna #52	no		1480942801	Drauzio Varella	UC9zqTTVeClpqMQ5CLuJdWtw	Science & Technology	804232	21156	520	0.024579315560597	0	820
p0O-fL-JJBI	#HangoutZika | Melhores Momentos	no		1458223201	Drauzio Varella	UC9zqTTVeClpqMQ5CLuJdWtw	Entertainment	250096	1995	18	0.0090225563909774	0	74
Hvte3XpPceQ	Sedentarismo: o pai de todos os males | Coluna #107	no		1552312803	Drauzio Varella	UC9zqTTVeClpqMQ5CLuJdWtw	Science & Technology	501071	68296	627	0.0091806255124751	0	2023
iEzesXm9Faw	Videoaula | Enfermagem em Imunização	no		1333471274	PortalEducacao	UCI2EhvTADDdOex2nBIRsigw	Education	273895	1983	183	0.092284417549168	0	3
cSG3-7IF4Gc	A importância da vacinação | Temas de Redação	no		1536699604	Aulalivre - Enem 2020 e vestibulares	UC4zG6UeNUn-HM6UEFFkiESA	Education	49357	2896	41	0.014157458563536	0	84
thsBnZyUJns	Síndrome do Pânico | Drauzio Comenta #08	no		1463407205	Drauzio Varella	UC9zqTTVeClpqMQ5CLuJdWtw	Science & Technology	1048747	42596	500	0.011738191379472	0	2448
8qkE4P2H5OY	Gastrite nervosa | Drauzio Comenta #24	no		1473688802	Drauzio Varella	UC9zqTTVeClpqMQ5CLuJdWtw	Science & Technology	985759	24662	632	0.025626469872679	0	760
2UKYd-vBV1I	Ansiedade | Rodrigo Bressan (parte 2)	no		1580133601	Drauzio Varella	UC9zqTTVeClpqMQ5CLuJdWtw	Science & Technology	59054	7096	32	0.0045095828635851	0	271
vzpbzjwlXTU	Diagnóstico de autismo - desconfiança características e pós diagnóstico.	no		1498847342	Aline Vicente	UCA1nC2t2zfzBOySscmpIzGQ	People & Blogs	646417	31951	513	0.016055835498106	0
FvXye0_Cwok	Quem deve tomar a vacina contra o sarampo | Coluna #117	no		1565618403	Drauzio Varella	UC9zqTTVeClpqMQ5CLuJdWtw	Science & Technology	148686	9842	137	0.013919934972567	0	378
RUrjbWOuVhY	Paciente com Alzheimer não pode ser isolado | Coluna #111	no		1558015204	Drauzio Varella	UC9zqTTVeClpqMQ5CLuJdWtw	Science & Technology	31758	3781	18	0.0047606453319228	0	92
TwTFfJbztWo	Comentando comentários (de novo) | Drauzio Comenta #65	no		1503324003	Drauzio Varella	UC9zqTTVeClpqMQ5CLuJdWtw	Science & Technology	558450	79078	294	0.0037178482005109	0	3786
CiK7Gc4U4Ho	É possível contrair dengue mais de uma vez?	no		1578578404	Drauzio Varella	UC9zqTTVeClpqMQ5CLuJdWtw	Science & Technology	7630	1199	7	0.005838198498749	0	39
KoHm4I_epdQ	Dr. Drauzio fala sobre quando pegou febre amarela | Coluna #56	no		1486386002	Drauzio Varella	UC9zqTTVeClpqMQ5CLuJdWtw	Science & Technology	760086	17998	1397	0.07761973552617	0	1176
52vAHpdyBgI	Sarampo - Você Bonita (26/02/19)	no		1551206737	Você Bonita	UCxucJ9P3mLMneYypLZYn2uw	Howto & Style	2219	41	0	0	0	2
e-W52pEez20	Depressão na Adolescência e Antidepressivos | Drauzio Comenta #03	no		1454331101	Drauzio Varella	UC9zqTTVeClpqMQ5CLuJdWtw	Science & Technology	1117444	77007	407	0.0052852338099134	0	2754
3zTJlC8lAmY	Colesterol e consumo de alimentos | Nágila Damasceno	no		1554386400	Drauzio Varella	UC9zqTTVeClpqMQ5CLuJdWtw	Science & Technology	39989	3953	111	0.028079939286618	0	318
rv5HImuSutA	Doses da vacinação contra a hepatite B | Drauzio Comenta #69	no		1506952804	Drauzio Varella	UC9zqTTVeClpqMQ5CLuJdWtw	Science & Technology	79634	3076	41	0.01332899869961	0	143
DP-AqgJ6GMc	Um Outro Olhar #1 | Um recomeço	no		1556632801	Drauzio Varella	UC9zqTTVeClpqMQ5CLuJdWtw	Science & Technology	19061	3172	17	0.005359394703657	0	81
eqw223qTO5Y	Hipotireoidismo | Drauzio Comenta #23	no		1473084005	Drauzio Varella	UC9zqTTVeClpqMQ5CLuJdWtw	Science & Technology	1302902	36062	783	0.021712606067328	0	1014
P-8N4JfC4xg	Vacinação contra a febre amarela | Drauzio News #28	no		1559138409	Drauzio Varella	UC9zqTTVeClpqMQ5CLuJdWtw	Science & Technology	10603	1367	9	0.0065837600585223	0	38
MeC4j-9DiS4	Entenda quais são as vacinas específicas para adultos	no		1511370823	Balanço Geral	UCqZN-NqgP7bhbctbyThSVUA	News & Politics	13998	209	8	0.038277511961722	0	14
tJJ5n6NsFcU	Calendário de vacinação - Mulheres (05/03/18)	no		1520284196	Mulheres	UCDtVoSwSwQgwhcC89Nlz5Vg	Entertainment	9225	129	4	0.031007751937984	0	2
ruQ0rLeSeVo	Vacinas e efeito rebanho | Animações #13	no		1569247212	Drauzio Varella	UC9zqTTVeClpqMQ5CLuJdWtw	Science & Technology	17330	3510	19	0.0054131054131054	0	166
f8Xa1zyU25I	Fake news sobre vacinas | Tira-dúvidas com especialista #08	no		1567692009	Drauzio Varella	UC9zqTTVeClpqMQ5CLuJdWtw	Science & Technology	9120	1505	20	0.01328903654485	0	147
8o2BkVIn8Rc	CAUSAS DO AUTISMO	no		1554577200	Saúde em Dia	UCSruzCoJeEIu3jNSwrCU9HQ	People & Blogs	577	21	1	0.047619047619048	0	1
7Zk3aFiPWzk	Cuidado com as pseudociências | Coluna #112	no		1558101601	Drauzio Varella	UC9zqTTVeClpqMQ5CLuJdWtw	Science & Technology	51032	10435	61	0.0058457115476761	0	333
ZXnYHcVmxqk	Um Outro Olhar #2 | Alzheimer	no		1557756006	Drauzio Varella	UC9zqTTVeClpqMQ5CLuJdWtw	Science & Technology	14754	2025	24	0.011851851851852	0	98
lGnonp8-iqU	Viroses infantis | Tira-dúvidas com especialista #11	no		1576159207	Drauzio Varella	UC9zqTTVeClpqMQ5CLuJdWtw	Science & Technology	5466	799	4	0.0050062578222778	0	12
2B17yJiUFzc	Autismo açúcar no ferimento e gases | Drauzio Comenta #100	no		1567432801	Drauzio Varella	UC9zqTTVeClpqMQ5CLuJdWtw	Science & Technology	93654	10067	53	0.0052647263335651	0	285
xIKT0DqSi48	A Importância das Vacinas - Todo Seu (07/03/19)	no		1552061071	Todo Seu	UCW4t6ozY9VDVeN_GHK260BQ	Entertainment	1850	118	2	0.016949152542373	0	31
3SpiKe04erk	A IMPORTÂNCIA DA VACINAÇÃO | com Drauzio Varella	no		1562860801	Tua Saúde	UCUp-GSUuNxSZ7cxOg7ZnyqA	Science & Technology	13106	871	42	0.048220436280138	0	107
-sLPjn8JMQQ	10 Jeitos Fáceis de Aumentar a Testosterona Naturalmente	no		1536961599	INCRÍVEL	UCIQPHl1WKKTt9KkWyo_JNig	People & Blogs	866873	55903	802	0.014346278375042	0	1200
lyiVh0zuV-k	VACINAS DAS GESTANTES | CALENDÁRIO DE VACINAÇÃO	no		1553504545	Enfermundo	UC8IbAhPglJ1OeC44A_Gtmqg	Education	9316	422	11	0.0260663507109	0	21
NzZkr_m_DSc	Teste seus conhecimentos sobre vacinas	no		1531523821	Governo do Brasil	UCOwuzVSWrrAdRIviGN7-T5g	News & Politics	5012	74	5	0.067567567567568	0
Z7z0_yt0Tmk	AULA GRATUITA - Calendário Vacinal de Forma Rápida e Objetiva | Prof. Hygor Elias	no		1564610298	EnfConcursos - Enfermagem para Concursos	UChHd-MU2mOvZHmBQz6zJw_w	Education	70358	3015	69	0.022885572139303	0	101
7P7-bnd3HpY	Vacinas: Ameaças e verdades por trás dos mitos | Carla Domingues - USP Talks #22	no		1535981841	USP Talks	UCw8ZXVXrAyNTdvzKH6HMhmg	People & Blogs	991	50	4	0.08	0
eaVKsoJWZrY	Movimento anti-vacinação faz lembrar a chamada revolta das vacinas	no		1393338956	Jornalismo TV Cultura	UCXdXYG8dUmEv6jhEji_lSHg	News & Politics	1808	31	2	0.064516129032258	0	0
g1de4DvszNU	Lactose - os mitos e verdades a intolerância e a dieta zero lactose	no		1492965668	Doutor TV	UCViYj9umcJZdjKITQrB1D5A	People & Blogs	28114	757	31	0.040951122853369	0	42
JJJ8_x0J7ts	Os movimentos antivacina são criminosos afirma Dr. Drauzio Varella	no		1569166496	CEDIPI	UCjzUQX-5DwOTR1q68ydu_bg	People & Blogs	279	4	0	0	0	0
OTm3Ww6bBRY	CAUÊ MOURA + DRAUZIO VARELLA | POUCAS #24	no		1555962412	UOL	UCVFbXI6Gu8U2f9Gjtxw4A-Q	News & Politics	332751	31631	484	0.015301444785179	0	1089
QSSiZIifRLA	Os prejuízos do ácido fólico - Mais Saúde 08/10/18	no		1539095653	Dra. Gisela Savioli - Nutricionista	UCsW2F43izuIFU58yq_anyDA	Education	450504	19679	963	0.048935413384826	0	1893
KgjYMGnV_ak	Tire de sua mesa que é veneno esse ALIMENTO NATURAL -《Dr. Lair Ribeiro》	no		1566272370	U MIÓ QUE TÁ TENO	UC4F32QLrpDmmRrozxr9z59g	Science & Technology	867887	49382	636	0.012879186748208	0	3308
w7PI724zOMY	10 MITOS E VERDADES SOBRE AS VACINAS	no		1558450810	Nunca vi 1 cientista	UCdKJlY5eAoSumIlcOcYxIGg	People & Blogs	4236	937	10	0.010672358591249	0	124
PB-HQWl4Xlw	Doses e Vias de administração das Vacinas - Completo.	no		1555809785	Anii G.	UCq8ChnGCYMVCzDgGMK9e91A	Science & Technology	26827	1626	52	0.031980319803198	0	76
0nqkxO79nME	Dicas sobre Aplicação de Vacinas: Vias Técnicas	no		1555423833	Aplicar Conteúdos em Saúde	UCkke64Kird1ZcZsPJEo_hYg	Education	17089	739	13	0.017591339648173	0	10
nSZ3KFPnuvo	A importância da vacinação	no		1521059084	Criar e Crescer	UCgbbjw8zPkrmmL_XU1SgJBg	Education	6552	307	4	0.013029315960912	0	23
1Kk8HxpwPVk	Tema de Redação: OS DESAFIOS PARA SE GARANTIR A COBERTURA VACINAL NO BRASIL	no		1535394040	Aucielly Nobre	UCbM9lRa0XE5Nsgqo8rsndvg	Education	6732	496	3	0.0060483870967742	0	28
JNymX4Oad5A	Foi chamar o Bolsonaro de MILICIANO e se deu mal! PEGADINHA COM ESQUERDISTAS	no		1557954000	Canal do Ferreira	UCZ4pDPv5kdO_2Da5brOlOZQ	News & Politics	1097774	130110	1485	0.011413419414342	0	12746
Kq5LGBxPzPA	Sarampo: Está com a vacina em dia? Campanha vai começar!	no		1531935747	Balanço Geral Joinville	UCWX70TFNwDsBLYlRzOe_-zw	People & Blogs	703	9	4	0.44444444444444	0	2
Pk_zpyjw0hg	Drauzio IRONIZA frase de Lair Ribeiro em Evento quem será q está com a razão?.	no		1489957056	U MIÓ QUE TÁ TENO	UC4F32QLrpDmmRrozxr9z59g	People & Blogs	1128514	21374	5109	0.23902872649013	0	12193
X3LxwIDLwNg	Falsa gravidez só é descoberta no aniversário de um ano da suposta criança	no		1502227800	Domingo Espetacular	UCP-Vg2PcmLiWpEdvMI1R35w	Entertainment	13924655	143985	14451	0.10036462131472	0	8823
Aox4-pLaOyA	Rio Tietê transborda e causa transtornos aos motoristas	no		1581349809	Hoje em Dia	UCN-opsqqDunWO6h5uCp9Y4g	Entertainment	550	51	4	0.07843137254902	0	2
tL4QF9avDts	TOMANDO VACINA DE NOVO... AINDA TEMOS MEDO!!! MAS TEM GENTE PIOR...RSRS	no		1570375802	Gemeas Japonesas	UCJMH8GNRXMjr2uGci28v9_g	People & Blogs	194867	4151	277	0.066730908214888	0
GlOaGXP1tPI	Domingo Espetacular conversa com pais que decidiram não vacinar os filhos	no		1502109491	Domingo Espetacular	UCP-Vg2PcmLiWpEdvMI1R35w	Entertainment	96277	1705	154	0.090322580645161	0	2630
fKhz2YOjU7U	REAÇÕES À VACINA – COMO AJUDAR O SEU BEBÊ | Monica Romeiro	no		1535029208	Almanaque dos Pais	UCy7oVBYY0FGXeeJpy6ITXxQ	People & Blogs	185221	10045	229	0.022797411647586	0	375
VFw4zNxPtt8	Quais são as vacinas do bebê? Quais reações esperadas?	no		1474465973	Eu amo meu bebê	UCS7R8itSUunTrA19WrZMWxw	People & Blogs	1011	25	0	0	0	2
lUvLK_GChM4	Procura por vacina contra meningite aumenta pelo Brasil	no		1551711722	Hoje em Dia	UCN-opsqqDunWO6h5uCp9Y4g	Entertainment	8836	241	9	0.037344398340249	0	39
xMGVuUg_MJ4	Vacina contra o sarampo - Mulheres (18/07/19)	no		1563484909	Mulheres	UCDtVoSwSwQgwhcC89Nlz5Vg	Entertainment	19232	295	21	0.071186440677966	0	62
nrz6pVyZcp0	Jacaré entra em condomínio pula na piscina e surpreende moradores	no		1580997454	Hoje em Dia	UCN-opsqqDunWO6h5uCp9Y4g	Entertainment	1310	93	5	0.053763440860215	0	4
NMF-26U0yOg	9 Sintomas de Meningite que Todos Deveriam Saber	no		1515039560	INCRÍVEL	UCIQPHl1WKKTt9KkWyo_JNig	People & Blogs	445555	17656	341	0.019313547802447	0	681
ojH-itqAXhs	Meningite: Inflamação é causada por vírus ou bactéria	no		1551577991	Band Jornalismo	UCoa-D_VfMkFrCYodrOC9-mA	Entertainment	4608	98	5	0.051020408163265	0	0
sqFOgtDzu7g	REAÇÕES DAS VACINAS	no		1470102175	WELIDA DANCINI	UCORRcj9wv5DEYCEg2LhBcLQ	People & Blogs	54733	590	72	0.12203389830508	0	54
FOrZXG-6DG4	Que movimento é esse ANTIVACINA?	no		1534254720	Canal Futura	UC2mmP8ysfyko40KSn90x6Og	Education	10416	568	36	0.063380281690141	0	374
Oe4IXQDeQiM	JC Debate | Vacinação | 10/04/2017	no		1491840539	Jornalismo TV Cultura	UCXdXYG8dUmEv6jhEji_lSHg	News & Politics	2350	86	5	0.058139534883721	0	5
nT9Z4VsMLTg	Dia de Vacina	no		1557014405	Tia Dani	UCR2IONXExRWEGxREw7lXHCQ	People & Blogs	6765178	46598	13786	0.29584960727928	0
nwUNkro2Oc4	Vacina DTP (Tríplice Bacteriana) - Profa. Juliana Mello	no		1559490411	ENFrente Enfermagem Continuada	UCD9kk0EUEtflrRl6TV0lDyA	Education	3214	266	1	0.0037593984962406	0	20
SRM7eLrTEEc	Duas mortes por reação à vacina	no		1516401712	Jornal da Gazeta	UCNl_i-ggJbZNyOLlhE7yyhw	News & Politics	12054	154	10	0.064935064935065	0	50
W6P88q72ero	Sobre as novas Vacinas da Meningite	no		1439597357	MaterniArte	UCZmc8QllMtE-fr51p1niyjw	Entertainment	3518	63	3	0.047619047619048	0	6
5dijNX4HYz4	Reações às vacinas: a resposta do corpo	no		1554903557	Ministério da Saúde	UC12zKGLhMhDeDidoctM6BrA	Nonprofits & Activism	8823	123	12	0.097560975609756	0	9
VVgGNj-PRVU	Vacinar é proteger: a importância da vacinação e os perigos da não imunização	no		1499115844	Ministério da Saúde	UC12zKGLhMhDeDidoctM6BrA	Nonprofits & Activism	12633	160	8	0.05	0	1
jYvsnY30t2w	Calendário de Vacinação ATUALIZADO!!! (PNI)	no		1552695021	Anii G.	UCq8ChnGCYMVCzDgGMK9e91A	Science & Technology	174154	9188	345	0.037548976926426	0	460
cWiFBhX4ld8	Mãe luta para que tratamento de primeiros socorros seja obrigatório nas escolas	no		1516985760	Hoje em Dia	UCN-opsqqDunWO6h5uCp9Y4g	Entertainment	7169	276	9	0.032608695652174	0	14
NOB7WETZJ00	Saiba por que a vacina contra o HPV é importante	no		1483980611	vejapontocom	UCV6Ue4o5UIeKQ3IEkjnXRlg	News & Politics	8245	170	14	0.082352941176471	0	13
LopjODuH_O8	AULA VACINA DTP | Calendário de vacinação infantil | Parte 13	no		1545158809	Enfermundo	UC8IbAhPglJ1OeC44A_Gtmqg	Education	8429	364	5	0.013736263736264	0	11
ky6eCkeuksY	Mãe relata como foi a reação de bebe após receber vacina	no		1510078199	Balanço Geral Itajaí	UCyvhqROV3luJvtt2dLTFhAA	People & Blogs	17851	166	15	0.090361445783133	0	31
Qcc6MH2dYPQ	A vacina contra febre amarela tem alguma contraindicação? | JNT	no		1516706747	Revista Novo Tempo	UCcoPc-BqFPkVkkwyS35J-ng	News & Politics	1051				0	1
V0SeOi9ZWj4	Meu bebê não ganha peso. O que fazer?	no		1567515610	Dra Luciana Herrero	UC0nblCDJx75fBCDDqTCKHaQ	Education	14283	1624	18	0.011083743842365	0	87
II3imb_xVeM	Poliomielite - Você Bonita (17/07/18)	no		1531851311	Você Bonita	UCxucJ9P3mLMneYypLZYn2uw	Howto & Style	4376	110	1	0.0090909090909091	0	2
ql0x_eY3DPQ	Vacina Meningocócica do Posto e do Privado: existe diferença?	no		1506973921	Pediatra na Web	UCnwxA62CqAnW_z0n4WLbp6A	People & Blogs	6522	289	1	0.0034602076124567	0	34
fpQ5P5wVTWY	Vacina da Febre Amarela - Tomar ou Não? • Dr. Alexandre Feldman	no		1516826526	Alexandre Feldman	UCi2zMfox-UpFGAFfsMXqYfQ	Science & Technology	112930	3362	271	0.080606781677573	0	245
8jTEpEx9a_M	Vacina tríplice viral: sarampo caxumba e rubéola devem ser prevenidas também na fase adulta	no		1402927916	Minha Vida	UCMYTIyqS1-7wT-3pBB8bR5A	Science & Technology	56166	472	40	0.084745762711864	0	21
VTG8o6TxOjk	EXPECTATIVA VS REALIDADE TOMANDO VACINA	no		1510084803	Gustavo TV	UCT0ECF7TihWahDqpU2i9tQA	Entertainment	2583229	31839	3978	0.12494110995948	0
RWiYOx5FV_E	Enchente invade casas e moradores tentam salvar os móveis	no		1581349698	Hoje em Dia	UCN-opsqqDunWO6h5uCp9Y4g	Entertainment	184	12	3	0.25	0	1
QSpPhj5HiWI	Vacinação contra a gripe - Você Bonita (09/04/19)	no		1554833688	Você Bonita	UCxucJ9P3mLMneYypLZYn2uw	Howto & Style	17806	441	28	0.063492063492063	0	94
aX5yDUtHY48	TOMAMOS 9 VACINAS EM UM DIA - ROTINA COM OS GÊMEOS GALVÃO	no		1551304800	Yasmin Galvão	UCOQ_KwPhg3IZbigiK7NCnfQ	People & Blogs	298315	16449	455	0.027661256003404	0
xpy8D79fO00	Pais que não vacinam os filhos podem perder a guarda	no		1532630069	Balanço Geral	UCqZN-NqgP7bhbctbyThSVUA	News & Politics	2854	119	16	0.13445378151261	0	82
o-rDqlq-q5s	Mulher do cantor Sorocaba precisará repor o ferro durante a gravidez	no		1581000808	Hoje em Dia	UCN-opsqqDunWO6h5uCp9Y4g	Entertainment	8539	390	12	0.030769230769231	0	21
PnF0X7gY4io	DANIEL BECKER RESPONDE - VACINAR OU NÃO OS FILHOS? - CRIAR E CRESCER	no		1473255251	Criar e Crescer	UCgbbjw8zPkrmmL_XU1SgJBg	Education	17332	748	40	0.053475935828877	0	88
m6XH3c1uz7M	Especialista fala dos efeitos colaterais da vacina da gripe	no		1337363478	Jovem Pan News	UCP391YRAjSOdM_bwievgaZA	News & Politics	102496	718	181	0.25208913649025	0	311
uikJnuwnjZ0	Vacinação versus Movimento Anti-Vacina | bloco 1 | Realidade em Pauta	no		1533247203	Revista Novo Tempo	UCcoPc-BqFPkVkkwyS35J-ng	News & Politics	1492				0	0
a3p5rGrotNc	Saiba mitos e verdades sobre a vacina contra H1N1 – CN Notícias	no		1461937633	TV Canção Nova	UCVrKQMmA2ew9LFzeIDaOFgw	Entertainment	30642	301	70	0.23255813953488	0	0
ZfqwKtmzXkU	VACINAS REAÇÕES 4°MÊS	no		1561035782	Dicas Lara Ferreira	UC4JEf2ejgucNsmsFiEy0mSw	People & Blogs	40552	3892	43	0.011048304213772	0	227
JHYlMAGdcIE	Consultor de moda dá dicas sobre as tendências para a temporada Primavera-Verão	no		1505496622	Hoje em Dia	UCN-opsqqDunWO6h5uCp9Y4g	Entertainment	1648	41	1	0.024390243902439	0	0
BirgLRWaXic	Devo tomar a vacina de gripe?	no		1365448504	Jovem Pan News	UCP391YRAjSOdM_bwievgaZA	News & Politics	43056	613	190	0.30995106035889	0	274
kjVTrsp9fJ8	Vacina contra Meningite | Dra Ana Escobar	no		1537802640	Dra Ana Escobar	UCKtJs_zI1yzswHDWqkqHtWw	Education	5915	273	5	0.018315018315018	0	0
tcog3wvskek	Reações às vacinas: como evitar	no		1554907782	Ministério da Saúde	UC12zKGLhMhDeDidoctM6BrA	Nonprofits & Activism	7282	52	13	0.25	0	0
LzBWxm3BCCc	Primeira vacina contra Meningite B é apresentada em São Paulo - CN Notícias	no		1430943842	TV Canção Nova	UCVrKQMmA2ew9LFzeIDaOFgw	Entertainment	4514	46	2	0.043478260869565	0	0
6kJWjDE6Iq4	Pais acompanham a rotina e participam cada vez mais da criação dos filhos	no		1505499121	Hoje em Dia	UCN-opsqqDunWO6h5uCp9Y4g	Entertainment	584	21	1	0.047619047619048	0	2
PGIKmpJr0QU	[Maternidade] Você vai mesmo vacinar seu bebê?!	no		1476544489	Aláya Dullius	UCDpNPd9fc0fNudJ2_CHK4Xg	People & Blogs	9132	287	73	0.25435540069686	0	62
9aGM1OrW2Is	Quadrilha de estelionatários que falsificava assinaturas é presa no RJ	no		1581083176	Hoje em Dia	UCN-opsqqDunWO6h5uCp9Y4g	Entertainment	794	52	2	0.038461538461538	0	1
5TuBArbnPwU	Uma vacina contra o câncer	no		1544118643	Dr. Lair Ribeiro Oficial	UCk9mgpQVdJ5oKQWkM1UPBaQ	Entertainment	55083	5768	37	0.0064147018030513	0	234
etxhPWG4g48	Tríplice Viral - Prof. Hygor Elias | DicaENF	no		1529841603	EnfConcursos - Enfermagem para Concursos	UChHd-MU2mOvZHmBQz6zJw_w	Education	8266	191	9	0.047120418848168	0	3
KdgFXLLhnuE	Renato e Cristiane Cardoso ministram palestra no “Namoro Blindado in Concert”	no		1580997850	Hoje em Dia	UCN-opsqqDunWO6h5uCp9Y4g	Entertainment	5278	86	1	0.011627906976744	0	4
bxsh5SaYbyk	Vlog - Vacina de 4 Meses + Reações	no		1539825277	Sabrina Bernini	UCsNFdDp3O_lhT_QNkMdk4XA	Entertainment	36015	4949	65	0.01313396645787	0
duiI2RyeY4c	LEVAMOS A BEBÊ PARA VACINAR | Priscila Simões	no		1540128281	Priscila Simões	UCyE4KeQg54Bx34LxQB22xkw	People & Blogs	125422	19137	158	0.0082562575116267	0	516
CysQGe3kfDk	VACINA FEBRE AMARELA NOS MEUS FILHOS ALERTA	no		1516208683	Família Santinelli	UCOdXmOv9s5uQJPfe7w_4Dtw	People & Blogs	2065	143	3	0.020979020979021	0	6
GxzxkUE8SPg	A decisão de ter um filho | Vida & Saúde	no		1445340045	Vida e Saúde	UCpOKqTChGaGw-Oj53kk4jsg	Science & Technology	3538	83	4	0.048192771084337	0	4
prlTBT0bARE	A vacina da gripe pode causar reação?	no		1554931262	Record News	UCuiLR4p6wQ3xLEm15pEn1Xw	News & Politics	48862	539	101	0.1873840445269	0	223
rRrTBhbFQTo	Nova vacina - Meningite B	no		1433972548	paulotmaluf	UCnGjlUb4uF2rZWOpd-0x12g	People & Blogs	4790	45	2	0.044444444444444	0	6
inkU5oHd750	MEU FILHO NÃO COME!	no		1489586404	Criar e Crescer	UCgbbjw8zPkrmmL_XU1SgJBg	Education	94614	5044	85	0.016851704996035	0	356
LEmxXprE_sg	A TÃO TEMIDA VACINA DE 2 MESES ALICE TEVE REAÇÃO FEBRE E MUITO CHORO | VLOG	no		1544126401	Mari Cavilha	UCOS_wL35NuMn8qLASOQqfUQ	People & Blogs	104517	14591	447	0.030635323144404	0
M9vTSPBz034	BEBÊ TOMOU A VACINA DE 3 MESES VARRENDO NOSSO APÊ E MAIS | VLOG	no		1547064005	Mari Cavilha	UCOS_wL35NuMn8qLASOQqfUQ	People & Blogs	177111	22352	1049	0.046930923407301	0
-3VyfFNAM8g	Polícia descobre refinaria de drogas no interior de São Paulo	no		1581083645	Hoje em Dia	UCN-opsqqDunWO6h5uCp9Y4g	Entertainment	555	20	2	0.1	0	1
1xeaEOAcJyg	EDTA - HOMEOPATIA : RETIRA METAIS TÓXICOS E PREVINE DOENÇAS	no		1484162854	Prof. Dr. José de Felippe Jr.	UCQTOPLEFah0hBCB7dmaoPtw	People & Blogs	8837	434	9	0.02073732718894	0	76
HDWPA6RlV5c	Minha experiência de quase morte com a vacina da febre amarela	no		1516541415	Patricia Bencardini	UCRlrE2ZyiPLyS61pgJCIoUA	Comedy	73959	1866	118	0.063236870310825	0	465
5ghCdGv9Hb4	12 VACINAS GOTAS DE DOR E SOFRIMENTO	no		1394341162	Videos do Ivan	UCaETWlNTgth-0SPbX58Mh2g	People & Blogs	1877	71	1	0.014084507042254	0	4
x9D807nQ2Bs	Veja como foi a recepção dos brasileiros que chegaram da China	no		1581344860	tvbrasil	UCSv9d0kQegylHWpP83jWSQg	Entertainment	567	114	0	0	0	5
RTXayn256VA	Jair Bolsonaro faz reuniões com diversos ministros	no		1581345430	tvbrasil	UCSv9d0kQegylHWpP83jWSQg	Entertainment	848	159	1	0.0062893081761006	0	3
LqgsTvOD3Ac	Fabricantes de cigarros têm 30 dias para responder ação da AGU	no		1581122522	tvbrasil	UCSv9d0kQegylHWpP83jWSQg	Entertainment	198	12	1	0.083333333333333	0	4
JoI8NdsgeMc	Conheça o programa Startout Brasil que conecta startups com o mundo	no		1581346987	tvbrasil	UCSv9d0kQegylHWpP83jWSQg	Entertainment	60	2	0	0	0	0
bx9Z_jAaTEI	Atualização - Rede de Frio	no		1362757216	Somos Enfermagem TV	UCL41BsrnhsSSXG4zYwqC95g	Education	105880	1304	73	0.055981595092025	0	41
O7sJUe-Tda4	Começa campanha de vacinação contra o sarampo em todo o país	no		1581345897	tvbrasil	UCSv9d0kQegylHWpP83jWSQg	Entertainment	67	4	0	0	0	1
8MU_dDARgnA	Brasil oferece gratuitamente 14 tipos de vacinas para todas as faixas etárias	no		1413644367	TV BrasilGov	UCjaWLFTNqLkq3ZY2BJ4NYRg	News & Politics	3077				0
tllSN0P6Epc	Conheça os sintomas do transtorno de ansiedade generalizada	no		1581122572	tvbrasil	UCSv9d0kQegylHWpP83jWSQg	Entertainment	1076	58	0	0	0	0
e7yBhe2aDzc	Vacinação cai e casos de caxumba crescem	no		1532652907	Band Jornalismo	UCoa-D_VfMkFrCYodrOC9-mA	News & Politics	1011	10	2	0.2	0	3
ibU743D6I0k	Dia “D” | Vacinação contra poliomielite e sarampo	no		1415637171	Ministério da Saúde	UC12zKGLhMhDeDidoctM6BrA	Nonprofits & Activism	29030	168	23	0.13690476190476	0	0
MZVP0erOMUQ	Reações às vacinas: quando procurar atendimento	no		1554907782	Ministério da Saúde	UC12zKGLhMhDeDidoctM6BrA	Nonprofits & Activism	803	11	0	0	0	0
B0YXZVVspxc	Vacina Tríplice para gestantes entra no calendário do SUS	no		1416858774	tvbrasil	UCSv9d0kQegylHWpP83jWSQg	Entertainment	992	6	1	0.16666666666667	0	0
nl0JhFXTgw0	Vacina tríplice bacteriana: previna-se de tétano difteria e coqueluche	no		1401721024	Minha Vida	UCMYTIyqS1-7wT-3pBB8bR5A	Science & Technology	34405	277	14	0.050541516245487	0	7
6aDadkJMtTY	Reações às vacinas: o uso de medicamento	no		1554907782	Ministério da Saúde	UC12zKGLhMhDeDidoctM6BrA	Nonprofits & Activism	2362	29	1	0.03448275862069	0	0
XdIWeeE26G8	Jornal da Univates - Vacinação Tríplice Viral	no		1328116595	univates	UCYLwyFQWSQkdOuVnMUEYu7g	News & Politics	2850	3	2	0.66666666666667	0	0
zEJpUV6M93c	Video 360 Eurofarma | Remédio Lugano	no		1476407684	Agência Casa Mais	UCcnuou4Sjm-qF87yzWve1ug	Entertainment	5199	53	6	0.11320754716981	0	3
DPW5Qcch594	Vacina tríplice viral é aplicada em duas doses no Brasil	no		1436974550	TV BrasilGov	UCjaWLFTNqLkq3ZY2BJ4NYRg	News & Politics	5287				0
icUBb1XSrxc	Israel autoriza construção de mais 78 casas em dois bairros de jerusalém oriental	no		1416442103	tvbrasil	UCSv9d0kQegylHWpP83jWSQg	Entertainment	188	1	0	0	0	0
2uDTvwA6S9c	BNDES vende R$ 22 06 bilhões em ações da Petrobras	no		1581122579	tvbrasil	UCSv9d0kQegylHWpP83jWSQg	Entertainment	508	38	0	0	0	5
-JwX1jVwj_s	Repórter Brasil 07/02/2020	no		1581120283	tvbrasil	UCSv9d0kQegylHWpP83jWSQg	News & Politics	1635	81	0	0	0	2
_VZyhP-ZnZg	Vacina dtp chorei : reacoes; cuidados #papoentremaes	no		1478559074	luciana brito	UCABvMeFftxjprbpcl3bNimw	People & Blogs	8206	142	19	0.13380281690141	0
O0HsMAzDKv4	Vacina tríplice viral deve estar atualizada alerta Ministério da Saúde	no		1507297946	TV Arapuan	UC7XHNGVNCUs_V5B_xWAMQUQ	News & Politics	905	7	1	0.14285714285714	0	0
q4fefy5szMA	Receita abre consulta a lote residual do IRPF de 2008 a 2019	no		1581347466	tvbrasil	UCSv9d0kQegylHWpP83jWSQg	Entertainment	132	4	0	0	0	1
_PCW9jbf_AU	A transformação do menino Arthur no jogador Zico	no		1581304531	tvbrasil	UCSv9d0kQegylHWpP83jWSQg	Entertainment	925	90	5	0.055555555555556	0	3
NA6q7tVe814	Teatro Amazonas se firma como uma das principais atrações de Manaus	no		1581120503	tvbrasil	UCSv9d0kQegylHWpP83jWSQg	Entertainment	322	9	0	0	0	2
cRmJqRavNYI	Landim: Resolver indenizações do Ninho será igual ganhar um título	no		1581358854	tvbrasil	UCSv9d0kQegylHWpP83jWSQg	Entertainment	99	9	0	0	0	0
G_ZmHm8c_zM	Cresce o mercado de empreendimentos dentro das favelas de todo país	no		1581360616	tvbrasil	UCSv9d0kQegylHWpP83jWSQg	Entertainment	24	4	0	0	0	0
QD29yQloxHc	Gabriel Gonti se apresenta no Fique Ligado confira aqui	no		1581120239	tvbrasil	UCSv9d0kQegylHWpP83jWSQg	Entertainment	71	3	0	0	0	0
JCuEwTsn-jQ	Moradores de Belo Horizonte continuam em alerta por conta das chuvas	no		1581122140	tvbrasil	UCSv9d0kQegylHWpP83jWSQg	Entertainment	444	10	1	0.1	0	0
ENGdIpb_830	Mãe cria aplicativo inspirado nas necessidades da filha autista	no		1581127178	tvbrasil	UCSv9d0kQegylHWpP83jWSQg	Entertainment	474	20	1	0.05	0	2
FQ7xMghvn8c	Saiba mais sobre possíveis efeitos adversos da vacina	no		1531526952	Governo do Brasil	UCOwuzVSWrrAdRIviGN7-T5g	News & Politics	883	15	5	0.33333333333333	0
F2Mhpo9X1qE	Lista de espera do Sisu será divulgada hoje	no		1581346301	tvbrasil	UCSv9d0kQegylHWpP83jWSQg	Entertainment	175	6	1	0.16666666666667	0	1
LjlCl1xnXts	Oscar 2020 em destaque no Sem Censura	no		1581359175	tvbrasil	UCSv9d0kQegylHWpP83jWSQg	Entertainment	44	5	0	0	0	0
bHx4h10n4TQ	Verdade das vacinas sujas revelada	no		1275673466	aphomeopatiaTV	UCTGVdd_qB7Rz4X4oAKZ0kyg	People & Blogs	56329	419	19	0.045346062052506	0	38
APsCg6yeYig	REACÃO VACINA	no		1271001480	tvsulsc1	UC6ZSx1wPLaXyZ0yrbWikeNQ	People & Blogs	3691	25	2	0.08	0	5
oNKBtqpNj98	Reforço da Tríplice Viral	no		1308424346	Flavia Martins	UC88EfXGkc_98Q8XoZ8k9j7g	People & Blogs	5814	16	6	0.375	0	0
M52Decf4qJ0	Dicas de como baixar febre	no		1406820079	Josilma Salviano	UC01Os2Eeg6MCABfv384yKyQ	People & Blogs	76125	383	92	0.2402088772846	0	30
Hl_hLlKEGsA	Orientações na Vacina BCG	no		1432214782	Tele Educa Mato Grosso	UC9gmqJKNBOyCl2KLdJIv0mQ	Science & Technology	31396	285	32	0.11228070175439	0	1
Sq4PC4okRm4	VACINA TRÍPLICE VIRAL | Calendário de vacinação infantil | Parte 10	no		1532111792	Enfermundo	UC8IbAhPglJ1OeC44A_Gtmqg	Education	14752	493	9	0.018255578093306	0	12
2IxJ7xMqZt8	Como as vacinas agem no nosso corpo?	no		1345575234	ntvale	UChK2Fhha3BMBVSu8yqCWYZw	Travel & Events	54911	345	9	0.026086956521739	0	14
qb66OhR_KlY	Vivacin esclarece dúvidas sobre vacina Tríplice Viral (Sarampo Caxumba e Rubéola)	no		1532803527	Vivacin Clínica de Vacinas	UCbrwFkBkzcT9UmskS7g8vdA	People & Blogs	624	23	2	0.08695652173913	0	4
p2REzMi9QVY	Triplice viral	no		1419723053	Cuide se Familia	UCrJ_9o1YxOZiSqTCgKXApEQ	People & Blogs	6275	43	7	0.16279069767442	0	5
f5DoMoPwPKw	A polêmica das vacinas contra o vírus HPV | H1N1 | Guillan barré e Zica Virus	no		1451581074	Ezequiel Cordeiro - Hora Final	UCl4swlkSKDinuw5w5S77m8A	People & Blogs	10553	243	12	0.049382716049383	0	50
IJ-XIFNX3pI	Gabriela Rocha - Estás Comigo - Ensaio	no		1335019192	Gabriela Rocha	UC4t2mdI8uAiJDJSRjiWJT1Q	Music	2232505	12574	298	0.023699697789089	0	748
gVvJhDjrmTs	Zika pode causar esquizofrenia e autismo diz estudo	no		1528422754	Band Jornalismo	UCoa-D_VfMkFrCYodrOC9-mA	News & Politics	281	10	0	0	0	0
1kp2M6pKqVk	Posso me vacinar gripado?	no		1524164476	Ministério da Saúde	UC12zKGLhMhDeDidoctM6BrA	Nonprofits & Activism	23903	227	12	0.052863436123348	0	5
W6Kh-6dGq6w	Vacina Tríplice Bacteriana e Tríplice Viral _ Dr. Marcello Pedreira	no		1494504955	Dr. Marcello Pedreira	UCCIQoWSB2N80fU7x5ga3Biw	Science & Technology	2045	21	1	0.047619047619048	0	5
BBumt4RY9z8	Mitos e Verdades sobre a Vacina da gripe e suas reações	no		1524488401	Almanaque dos Pais	UCy7oVBYY0FGXeeJpy6ITXxQ	People & Blogs	17416	1040	20	0.019230769230769	0	136
3JgsA8yBijQ	Preparação da vacina	no		1478882995	Master D Portugal	UC1RnMyP-HfZCyMLX0TmyMTg	Education	46274	307	57	0.185667752443	0	9
rrwMjvUiqaY	AUTISMO COMPORTAMENTO	no		1359773239	TEA Vamos Falar Sobre Autismo	UCl01kak5i66hCdS_bCxkkgA	People & Blogs	733471	1930	425	0.22020725388601	0
WVZTOtGGzi0	Programa Viva - Bloco 01 - Catapora sarampo e rubéola	no		1343210332	Stella de Oliveira	UCi09l6tPPrtcfL9EOXncU5Q	People & Blogs	3785	15	1	0.066666666666667	0	1
7F3krddfZWo	NOVAS SALAS DE VACINAS	no		1389811170	TV Poços	UCh6e1_rbI_pUASvnLV_nyxQ	News & Politics	14521	41	4	0.097560975609756	0	3
8yXrZNalMAU	METADE DAS CRIANÇAS TERÁ AUTISMO EM 2025 POR CAUSA DOS AGROTÓXICOS	no		1558048483	Dr. Uronal Zancan	UCVqS-HRwe2vq_Jjgu4fg-UA	Education	44862	3571	59	0.016521982637917	0	339
jZAqT-eAZd4	É perigoso usar estatinas? Real custo x benefício desse remédio.	no		1534184115	Meu Coração Saudável	UC49x20RykBnDY1RFHkdDnsw	People & Blogs	16126	1171	70	0.059777967549103	0	33
ekI-ODhAZPI	«Sou francamente a favor da vacinação das crianças contra o sarampo» - Você na TV	no		1521478804	TVI	UC5lg8zKcnJ1rnxR6lPgD1ug	Entertainment	675	6	2	0.33333333333333	0	1
Px7qv-XkQxo	AUTISMO - O QUE VOCÊ DEVERIA SABER	no		1532564060	Qvida Boa	UCJIKKHplhnzcDmpztqUO7nA	People & Blogs	7710	853	14	0.01641266119578	0	133
8E3OYxxTN1A	As vacinas e o autismo	no		1541067152	Pediatria para Todos	UCsYo9r-JIEkhoRoc9G5gdpQ	People & Blogs	267	4	0	0	0	0
jn_QgiJOf6M	GRIPE FEBRE E O XAROPE QUE MATAVA PESSOAS | Dr Lair Ribeiro	no		1552435024	U MIÓ QUE TÁ TENO	UC4F32QLrpDmmRrozxr9z59g	Science & Technology	258948	16804	202	0.012020947393478	0	876
eiFnWYDopXo	aberta a temporada de caça ao DR LAIR RIBEIRO	no		1507431610	Encarando o Sobrenatural Oficial	UCyhRfD3HkB-0VbFA1prxjxw	People & Blogs	408466	36044	762	0.021140827877039	0	3101
YGpqGFZr_Ls	Mitos e verdades: o assunto de hoje é vacinas	no		1527184357	Programa Ver Mais Oeste	UC5hGM-gAk5I8zmn8xUKuNkw	People & Blogs	72	4	0	0	0	1
lQ9ZXA-NmSw	VACINAS NÃO CAUSAM AUTISMO	no		1534188172	Autistologos Autismo	UC2mdv67uDPQO35IYkzK_Xzw	Education	248	16	2	0.125	0	3
Fw7MCcFiox8	Crianças e adultos devem se vacinar contra o Sarampo	no		1531176391	Jornal da Alterosa	UCxbqmMsXory_zC-kNqKHUgw	News & Politics	3758	34	6	0.17647058823529	0	2
80HOyA9-zCE	Mito ou verdade - Após tomar a vacina da gripe eu fico gripada?	no		1350835902	Canal Profissional	UCmUmPLUgKmHvKvYNnrXMZWw	People & Blogs	918	0	5		0	4
ss-WFK0cuhI	Você ainda quer tomar vacina	no		1307977473	A SERVIÇO DO REI	UCDJlmfZ78gkrO-QkN-damRg	Nonprofits & Activism	682	5	0	0	0	8
iaN2iYYUfLk	Vacina - tríplice viral	no		1522160833	Donaldo Bezerra	UCplIRjNdaKLVrAS4D-Dil7Q	People & Blogs	122	0	1		0	0
OKIPSaK86KQ	5 DICAS DO REIZINHO AUTISTA	no		1553611521	CBI of Miami	UCuAaB8lLRmoZzOrc_d_Ka0A	Education	1483				0	6
N4CGg2LL5Ic	ESTIMULANDO A ATENÇÃO COMPARTILHADA DA CRIANÇA	no		1578430804	CBI of Miami	UCuAaB8lLRmoZzOrc_d_Ka0A	Education	187				0	0
8fjzYf5Yno4	VACINA E FAKE NEWS | ECONOMIA É TUDO #07	no		1531841576	Canal do Por Quê?	UCqWMwhpW-rggQZtfNXIqkrw	News & Politics	1299	104	4	0.038461538461538	0	9
43arsErzF0g	TDAH MEDICAÇÃO PARA A VIDA TODA?	no		1535636931	CBI of Miami	UCuAaB8lLRmoZzOrc_d_Ka0A	Education	3179				0	12
6chp2gQ1mco	MITOS DO AUTISMO - Entenda a Respeito	no		1572382802	CBI of Miami	UCuAaB8lLRmoZzOrc_d_Ka0A	Education	703				0	6
r_9l8NYR1g8	As pesquisas mais avançadas em autismo no mundo - com Alysson Muotri Ph.D	no		1555681456	Luna ABA	UCk0U1Js-um2lRjSF3VoS_3A	Education	7126	619	12	0.019386106623586	0	44
gGXoEyd_OPU	Conheça a menina Laura que tem síndrome de Asperger « Programa Especial	no		1278354623	tvbrasil	UCSv9d0kQegylHWpP83jWSQg	Nonprofits & Activism	214369	1519	46	0.030283080974325	0	34
TBsdLwK7pcM	Autismo	no		1357995660	tvbrasil	UCSv9d0kQegylHWpP83jWSQg	People & Blogs	18010	122	6	0.049180327868852	0	10
LS4vCDKDUQ0	Autismo	no		1342543206	tvbrasil	UCSv9d0kQegylHWpP83jWSQg	Entertainment	52961	411	15	0.036496350364964	0	18
mNab1gzIy1o	MTV Autismo - Documentário	no		1309044000	Fernando Channoschi	UCV9EVCVbJus_StqIJ89ajLA	Entertainment	151644	1374	25	0.018195050946143	0	81
DmH_2GT6VeA	Denise Carreiro: Ninguém nasce autista	no		1430138158	NAMU	UCPCwZ6sP0cAwgMsGZ23rOYA	Howto & Style	28549	815	67	0.082208588957055	0	131
V5qzJSuuXxU	DIAGNÓSTICO TDAH?	no		1541080784	CBI of Miami	UCuAaB8lLRmoZzOrc_d_Ka0A	Education	1268				0	8
REfNVmdh0Uk	Bobocas anpóficos	no		1556914759	Olavo de Carvalho	UC6RQhzm93SterWntL7GzqYQ	Comedy	324647	48426	1469	0.030334944038327	0	3329
jz2H_L5iXCY	AUTISMO: VALE A PENA MUDAR PARA TRATAR NOS EUA?	no		1556632834	CBI of Miami	UCuAaB8lLRmoZzOrc_d_Ka0A	Education	1786				0	17
KVCWw6BOl6g	3 COISAS QUE O MÉDICO NÃO TE FALA	no		1542718813	CBI of Miami	UCuAaB8lLRmoZzOrc_d_Ka0A	Education	2943				0	28
g_x_MtYzJ1g	Lei assegura benefícios às pessoas com autismo nas áreas de saúde e educação	no		1358422368	TV SUPREN	UCAJAbdjUtxGM9zaD_epYpcA	News & Politics	34182	652	20	0.030674846625767	0	18
uz0U3bn3zCk	Autismo Regressivo	no		1474923706	Mayra Gaiato	UC42k7FI53tnSSIjgzW-rbLA	Education	19905	2189	19	0.0086797624486067	0	87
p-kpOiqCrgs	Papo de Mãe # AUTISMO!!! Como é feita a descoberta??? Primeiros passos parte 1.	no		1487271481	Ruth Avelino	UCCWZCP1lQxWvjQUUOWc6dFw	People & Blogs	3366	138	5	0.036231884057971	0	23
XeFXSETAbNM	Autismo - Como identificar autismo em adultos?	no		1539007267	Mundo Autista	UCqF3BLbPXpNGNgsV3oJvDlw	People & Blogs	51606	2043	59	0.028879099363681	0	191
bJ5X6Vp84Zo	Não vacinar crianças faz com que doenças consideradas erradicadas voltem a atingir a população	no		1533577479	TV BrasilGov	UCjaWLFTNqLkq3ZY2BJ4NYRg	News & Politics	957				0
lhFPFRjBO8U	Autismo clássico é uma inflamação no cérebro?	no		1526490276	Biologia Digital	UCRuR7ytSs0YokBvxr8rM3ZQ	Education	1289	96	2	0.020833333333333	0	17
kKVCAVc5b78	DIAGNÓSTICO de Autismo do Eric - Como desconfiamos e descobrimos o AUTISMO LEVE	no		1516822201	Mamãe Tagarela	UCz1xVDltULzUhZCJ1TkvnTQ	People & Blogs	19431	1028	13	0.012645914396887	0	50
jI0AaLMzmxs	Os Sinais do Autismo	no		1496232142	Carla Ulliane	UCA2llkURdTm63bBB3nTBw1w	People & Blogs	503454	15798	630	0.039878465628561	0	916
KDvO89lRKAM	Dicas para pais - autismo	no		1462185719	Andréa Werner	UC3lP5c55UE0ozG-uN0uBsXg	People & Blogs	40469	2144	24	0.011194029850746	0
O8gXgjUM-VE	Autismo_Como foi descobrir a Síndrome de Asperger	no		1457471771	Andréia Camargo	UCjrmFzNfoXO-We5rT6jB4vg	People & Blogs	8459	309	6	0.019417475728155	0	25
duKSeqxO4ww	Invaginação intestinal Julia Leão	no		1440227955	Leonardo Leao	UCGTfGu7XEakOH2wL1Si2rqA	Entertainment	7577	92	11	0.1195652173913	0
danXx84ray8	ADOÇANTES CAUSAM CÂNCER?!	no		1438727401	Caio Bottura	UCepEtTIMTtU-MbFHz-pOZMw	Entertainment	24903	2568	30	0.011682242990654	0	168
M0svOfmcczI	H2O Meninas Sereias 2 Temporada Episodio 7 Em Água Quente Dublado	no		1487814458	H2O Meninas Sereias	UCpuW6sUUE2Y0xW-KZhm347A	People & Blogs	2065610	36038	1240	0.034408124757201	0	1910
i1GX2nXST-c	Marcos Mion e a nova Lei para os autistas sancionada pelo Presidente Jair Bolsonaro	no		1563660509	Jair Bolsonaro	UC8hGUtfEgvvnp6IaHSAg1OQ	News & Politics	51990	12551	51	0.0040634212413354	0	784
3aeZLT_YSU4	Autismo e música II	no		1466994399	Diário de um autista	UCbhT_vtlwr7X2wG6q_0mWVQ	People & Blogs	2384	330	0	0	0	13
I2w4NDL5cLg	Como descobri que meu filho tem autismo	no		1507855034	Meu pequeno Rockstar	UCNFm4lN_IMhpQ_AfbcQAtag	People & Blogs	3342	87	1	0.011494252873563	0	6
z5pANj3DfpY	Algumas informaçãoes sobre o autismo	no		1452673658	Diário de um autista	UCbhT_vtlwr7X2wG6q_0mWVQ	People & Blogs	6950	1085	2	0.0018433179723502	0	45
vOJckOTydJI	QUEM SÃO AS PESSOAS QUE ADERIRAM AO MOVIMENTO ANTIVACINA?	no		1563658637	MyNews	UCUM4-KGZEXC2pk6zRDL9jMQ	News & Politics	4053	252	14	0.055555555555556	0	40
86ujEynQSVU	ÁREA 51: O ESCONDERIJO DOS ET S	no		1563816614	MyNews	UCUM4-KGZEXC2pk6zRDL9jMQ	News & Politics	4605	337	17	0.050445103857567	0	22
ZC-2vdfTDtU	Descobrindo o Autismo!!	no		1542043172	Bruna Gonçalves	UCBjgxj_j4IYH7cq6pM6Aqvw	People & Blogs	169	17	0	0	0	4
rXhGmIk-hys	Documentário sobre autismo	no		1452538195	Associação Esperança Azul Patos de Minas	UCKhy2n1rCRSQNGuyqL-7r-Q	People & Blogs	3685	115	2	0.017391304347826	0	1
YEZ3RoHlrEc	Neuropediatra explica como age remédio para TDAH	no		1347127838	TDAH - Ciência e Aprendizagem	UCLHpzj63LeJ-IoRSGB3V2fg	Education	113934	1580	59	0.037341772151899	0	171
gaGNoZLG6xA	As maiores pérolas de Olavo de Carvalho. O pseudo filósofo que os bolsominions acham inteligente #2	no		1543078331	Tony Devito	UCyyD0uZzrvjF4GKsmFBuUOg	People & Blogs	9703	777	119	0.15315315315315	0	136
HFkAtaXdCdQ	Caracteristicas do Autismo (Leves e Severos)	no		1408288759	Débora Francelino	UCOqOdxzU58qOGoysdnVXd9Q	People & Blogs	558043	8118	552	0.0679970436068	0	430
4ljFFGbriDk	HOJE É DIA D DE VACINAÇÃO CONTRA GRIPE.	no		1494686918	Lagoa TV	UCtzAihT3XrcOS-Q9ReyYpQA	News & Politics	100	1	0	0	0	0
hqyqHvGKCgY	CAMPANHA - Pesquisa sobre vacinação.	no		1538055004	Comunicação Livre	UCVqte8NBusoopmqjIR3RRXg	News & Politics	53	4	0	0	0	0
6-3CoP4oNEQ	GRUPO PAGODE DOS AUTISTAS CANON	no		1401247710	vinicius oliveira	UCZNhZ_qzHFS7A4OkKHtgQbw	People & Blogs	111	2	0	0	0	0
YGXzFR0OcnQ	Olavo de Carvalho ANTI VACINAS O astrólogo guru de Bolsonaro	no		1547481709	falandoverdades.com.br	UCRfUfNEJVaY8AbAcb46qX0g	News & Politics	1890	36	15	0.41666666666667	0	31
RPYqZcPKTWY	Os Meus PIORES MOMENTOS na TV (Passei Vergonha!)	no		1545596611	Dicas do Salgueiro	UChsZDP7pW_08Sk6Tp4U8KJA	Sports	46218	2455	17	0.0069246435845214	0	72
PwyYYFKWEAg	Gaming Bliss - G-SYNC on LG OLED TVs!!!	no		1574625613	Linus Tech Tips	UCXuqSBlHAE6Xw-yeJA0Tunw	Science & Technology	976618	30550	663	0.021702127659574	0	2840
QBn-KgavNQo	JOÃO COUTO - CASTING 02 - IDOLOS 2015 AUDITION	no		1429740449	IDOLOS	UCDlVDJqYqHYEcgHRn8Mf25g	Entertainment	51881	253	6	0.023715415019763	0	26
PYxW9v0LW20	MITOS DA SAÚDE com Prof. António Vaz Carneiro | PODCAST #26	no		1556145368	Dicas do Salgueiro	UChsZDP7pW_08Sk6Tp4U8KJA	Sports	11877	543	5	0.0092081031307551	0	21
fokyS8KVC6c	Autismo: causas sintomas diagnóstico tratamento	no		1508347319	Canal USP	UCN1ihdoKXeixzYi7Hyp4WwQ	Education	62556				0	29
4sE9RzUTE8I	MATTHIAS HUES - O Vilão Mais Simpático de Hollywood! (PODCAST)	no		1581285611	Dicas do Salgueiro	UChsZDP7pW_08Sk6Tp4U8KJA	Sports	1211	85	1	0.011764705882353	0	6
M6ghTWrjGws	5 Melhores Exercícios Para OMBRO (Hipertrofia)	no		1517776640	Dicas do Salgueiro	UChsZDP7pW_08Sk6Tp4U8KJA	Sports	70994	2784	33	0.011853448275862	0	52
uON6EpG-RRE	A Dieta Cetogénica Vale a Pena?	no		1573753237	Dicas do Salgueiro	UChsZDP7pW_08Sk6Tp4U8KJA	Comedy	4695	206	6	0.029126213592233	0	52
E2PtvsZska8	Plano Treino Hipertrofia - Dia 2 Costas e Bicep! /Bodybuilding Plan - Day 2 Back and Biceps	no		1484684867	Dicas do Salgueiro	UChsZDP7pW_08Sk6Tp4U8KJA	People & Blogs	205840	3944	66	0.016734279918864	0	97
cD3JiJhpYus	FIZ OS TESTES DOS ATLETAS! - Velocidade Impulsão (salto) e Potência	no		1574627401	Dicas do Salgueiro	UChsZDP7pW_08Sk6Tp4U8KJA	Comedy	8976	494	6	0.012145748987854	0	10
EOB0xNBBzrw	Opinião Minas - A realidade do autismo no Brasil - 07/11/2016	no		1478526167	Opinião Minas	UC0YtWlcM-9XEt8NTXI1HAOw	Entertainment	1014	26	3	0.11538461538462	0
flRC2eSzrTM	ANOMALY - Misfits Podcast #66	no		1574101800	Misfits Podcast	UC6OUstIo-qXiJzcsJ0toz-A	Comedy	1150507	58862	359	0.0060990112466447	0	3918
TUxuGMn0bYQ	COMO PERDER GORDURA com Teresa Manafaia | PODCAST #10	no		1536100752	Dicas do Salgueiro	UChsZDP7pW_08Sk6Tp4U8KJA	Sports	27678	1033	11	0.010648596321394	0	32
N3r87AZEKN8	Os Esteróides (Testosterona) - Entrevista ao Salgueiro JORNAL TVI	no		1568977205	Dicas do Salgueiro	UChsZDP7pW_08Sk6Tp4U8KJA	Sports	107654	4023	85	0.021128511061397	0	315
3c1ihIE4HmM	WORKSHOP de CROSSFIT / TREINO FUNCIONAL! (LIVE)	no		1510271035	Dicas do Salgueiro	UChsZDP7pW_08Sk6Tp4U8KJA	Sports	26339	1591	9	0.005656819610308	0	39
p9lJGvne6YQ	SER MAIS CRIATIVO! - Jel Nuno Duarte - PODCAST #16	no		1544136751	Dicas do Salgueiro	UChsZDP7pW_08Sk6Tp4U8KJA	Sports	14136	605	9	0.014876033057851	0	35
djAiqIUtvBE	SALGUEIRO vs PAULO MUZY! (Batalha Épica)	no		1575998021	Dicas do Salgueiro	UChsZDP7pW_08Sk6Tp4U8KJA	Science & Technology	4690	316	10	0.031645569620253	0	8
llM77oAAZcU	Os Meus Objectivos Físicos Para 2018!	no		1515953287	Dicas do Salgueiro	UChsZDP7pW_08Sk6Tp4U8KJA	Sports	18929	1104	11	0.009963768115942	0	106
lL3neR0ShcM	As Dietas a Ciência e as TRETAS! | PODCAST #39	no		1573258006	Dicas do Salgueiro	UChsZDP7pW_08Sk6Tp4U8KJA	Comedy	21419	717	23	0.03207810320781	0	34
lK_UXScIp_s	ESTOU GORDO?! COMO ASSIM??	no		1505418535	Dicas do Salgueiro	UChsZDP7pW_08Sk6Tp4U8KJA	People & Blogs	47411	2948	22	0.0074626865671642	0	110
8-gWyXUYS3k	ワクチン副作用、６３人提訴 子宮頸がん、１５～２２歳女性	no		1469611633	KyodoNews	UCwJXtk_1CKlCrh7YJDP2uPw	News & Politics	58609	281	59	0.20996441281139	0
V_US5WbW-54	A Melhor Técnica de Agachamento! (LOW BAR vs HIGH BAR)	no		1574022614	Dicas do Salgueiro	UChsZDP7pW_08Sk6Tp4U8KJA	Comedy	6307	396	2	0.0050505050505051	0	23
sWB_062VDbE	O MEU CUT - Tudo o que como no Dia-a-dia (Vlog)	no		1528308388	Dicas do Salgueiro	UChsZDP7pW_08Sk6Tp4U8KJA	Sports	100711	3384	57	0.016843971631206	0	188
Cl5VkdA_1cE	Treino Completo de SACO DE BOXE! (Cardio e Explosão)	no		1578857400	Dicas do Salgueiro	UChsZDP7pW_08Sk6Tp4U8KJA	Sports	6295	648	4	0.0061728395061728	0	36
B-AAF9lGpgc	MAIS MÚSCULO MENOS GORDURA com Paulo Fernandes | PODCAST #13	no		1540420654	Dicas do Salgueiro	UChsZDP7pW_08Sk6Tp4U8KJA	Sports	41466	1551	20	0.012894906511928	0	38
c37mTacAB5s	OS MELHORES TREINOS DE 2019! (Instagram do Salgueiro - MOTIVACIONAL)	no		1577997004	Dicas do Salgueiro	UChsZDP7pW_08Sk6Tp4U8KJA	Entertainment	7233	448	4	0.0089285714285714	0	23
7KA5WITjb4k	HOMEM MAIS FORTE DE PORTUGAL - Fábio Silva - PODCAST #22	no		1550618735	Dicas do Salgueiro	UChsZDP7pW_08Sk6Tp4U8KJA	Sports	14790	627	4	0.0063795853269537	0	16
L7mqGx8cA7w	O Salgueiro Careca?!! NUNCA!!	no		1563132601	Dicas do Salgueiro	UChsZDP7pW_08Sk6Tp4U8KJA	Sports	15614	778	16	0.020565552699229	0	24
YXqNLj1jvaQ	FAZER DIETA EM 2020 | PODCAST #44	no		1579824282	Dicas do Salgueiro	UChsZDP7pW_08Sk6Tp4U8KJA	Sports	11968	490	6	0.012244897959184	0	19
S-cEmac2zUc	Como Comunicar e Viver Melhor! | PODCAST #37	no		1571180309	Dicas do Salgueiro	UChsZDP7pW_08Sk6Tp4U8KJA	Comedy	11203	702	3	0.0042735042735043	0	30
gMc9tDFGI9U	LIVESHOW DICAS DO SALGUEIRO - ESPECIAL 4 ANOS DAS DICAS!	no		1507845640	Dicas do Salgueiro	UChsZDP7pW_08Sk6Tp4U8KJA	Sports	28871	1719	15	0.0087260034904014	0	30
LojtTO2i_pg	Treina Como um Atleta Profissional! | PODCAST #38	no		1572393123	Dicas do Salgueiro	UChsZDP7pW_08Sk6Tp4U8KJA	Comedy	15782	690	9	0.01304347826087	0	12
naALcit1jlQ	TRANSFORMAÇÕES CORPORAIS com João Mimoso | PODCAST #4	no		1524783387	Dicas do Salgueiro	UChsZDP7pW_08Sk6Tp4U8KJA	Sports	21640	1009	10	0.0099108027750248	0	26
fv-Ai9x8saU	FELIPE FRANCO e SÉRGIO CHORÃO | PODCAST #32	no		1563751131	Dicas do Salgueiro	UChsZDP7pW_08Sk6Tp4U8KJA	Sports	31918	2034	20	0.0098328416912488	0	45
yDqenyuskJA	MELHOR DO PODCAST #1 - Dietas Atropelamentos e Sofrimento!	no		1551292313	Dicas do Salgueiro	UChsZDP7pW_08Sk6Tp4U8KJA	Sports	7582	427	3	0.0070257611241218	0	13
L-dms7ipF-k	O Ultimo Dragão Bruce Leroy! (PODCAST com Taimak)	no		1579473011	Dicas do Salgueiro	UChsZDP7pW_08Sk6Tp4U8KJA	Entertainment	1978	98	0	0	0	18
luVeT1NjqbE	Conformidade Social - O Experimento em uma sala de espera	no		1460201376	acvitorio	UCaEplKvlFhyg7P3eBmRtyCQ	People & Blogs	118631	1494	29	0.019410977242303	0	36
SzJ5JPygCvo	O TREINO DE CROSSFIT com Bruno Militão | PODCAST #8	no		1531263673	Dicas do Salgueiro	UChsZDP7pW_08Sk6Tp4U8KJA	Sports	23809	801	26	0.032459425717853	0	25
dPo8PD0CyvE	Perda de Gordura CrossFit e Negócio do Fitness - Marcos Viana - PODCAST #18	no		1546992481	Dicas do Salgueiro	UChsZDP7pW_08Sk6Tp4U8KJA	Sports	20880	839	13	0.01549463647199	0	22
gcTWMuOeBAc	A CIÊNCIA DA MOTIVAÇÃO - Dr. Alexandre Machado | PODCAST #17	no		1545350854	Dicas do Salgueiro	UChsZDP7pW_08Sk6Tp4U8KJA	Sports	17571	548	13	0.023722627737226	0	23
X7mB-ziEPpQ	SER ATLETA DE MMA com Pedro Carvalho | PODCAST #31	no		1562799504	Dicas do Salgueiro	UChsZDP7pW_08Sk6Tp4U8KJA	Sports	21043	903	10	0.011074197120709	0	25
XEfjXeg6TVk	Toda a Verdade Sobre o ARTIGO 13!	no		1544034485	Dicas do Salgueiro	UChsZDP7pW_08Sk6Tp4U8KJA	Sports	18168	1104	22	0.019927536231884	0	144
eYXw32fTEuM	TUDO SOBRE ESTERÓIDES ANABOLIZANTES - Sérgio Veloso - PODCAST #19	no		1548286617	Dicas do Salgueiro	UChsZDP7pW_08Sk6Tp4U8KJA	Sports	28530	1014	18	0.017751479289941	0	45
sdh0GuR_-k8	SEDE DE VENCER com Rui e Nuno Pavanito | PODCAST #7	no		1530228034	Dicas do Salgueiro	UChsZDP7pW_08Sk6Tp4U8KJA	Sports	26811	842	14	0.016627078384798	0	24
rFh75uNEt4M	COMPETIÇÃO DE CROSSFIT com João Ferreira e Luís Miguel Ferreira | PODCAST #35	no		1568158602	Dicas do Salgueiro	UChsZDP7pW_08Sk6Tp4U8KJA	Sports	13986	696	6	0.0086206896551724	0	10
3HGlRcdB_ZQ	TITO ORTIZ - Vencer no UFC e na Vida! (PODCAST)	no		1575493211	Dicas do Salgueiro	UChsZDP7pW_08Sk6Tp4U8KJA	Science & Technology	5270	379	0	0	0	20
7Pp8cbmWPQ0	CALA-TE E TREINA! David Chan e Paulo Santana | PODCAST #11	no		1538088142	Dicas do Salgueiro	UChsZDP7pW_08Sk6Tp4U8KJA	Sports	14942	552	2	0.0036231884057971	0	19
Lz6MVyzeem0	NUTRIÇÃO PARA ATLETAS com António Pedro Mendes | PODCAST #25	no		1554851151	Dicas do Salgueiro	UChsZDP7pW_08Sk6Tp4U8KJA	Sports	26225	891	16	0.017957351290685	0	31
MQQmd2gU3Kw	SEM DESCULPAS com Tiago Sousa | PODCAST #27	no		1557441066	Dicas do Salgueiro	UChsZDP7pW_08Sk6Tp4U8KJA	Sports	6159	319	1	0.0031347962382445	0	9
6kRlc0tV1uU	PATRÍCIA MAMONA - Os Segredos de uma Campeã! | PODCAST #24	no		1553297040	Dicas do Salgueiro	UChsZDP7pW_08Sk6Tp4U8KJA	Sports	9365	448	4	0.0089285714285714	0	6
xsCf6QdATQg	5 FAMOSOS COM AUTISMO (E QUE VOCÊ NÃO FAZIA IDEIA!)	no		1495387801	VAI UMA MÃOZINHA AI?	UClcatj2SigXMklFrqQtnA-Q	People & Blogs	165570	5969	318	0.053275255486681	0	325
ns4rY-ZEWGE	APLICOU E TEVE RESULTADO EM 48 HORAS!!	no		1573855206	Lucas Pinheiro	UCzYrkkCI1yvqvQyD-j56RIA	Sports	46802	9189	42	0.0045706823375775	0	207
YAfpY0YLgMM	PODCAST #3 - ARMAS DE FOGO & TRIATLO	no		1519252604	Dicas do Salgueiro	UChsZDP7pW_08Sk6Tp4U8KJA	People & Blogs	11666	634	7	0.011041009463722	0	19
eGUf1cBkRD8	PAULO MUZY - O REGRESSO! | PODCAST #29	no		1559085758	Dicas do Salgueiro	UChsZDP7pW_08Sk6Tp4U8KJA	Sports	76478	2157	50	0.023180343069077	0	63
wCsoXayaZQw	Minha filha tem Autismo? Como descobrir?	no		1554243517	Williany Rozendo	UCdvm4HMtgMwRCdkE3I7p6ZA	People & Blogs	93	8	1	0.125	0	3
SxVksnVdhBQ	Vacinas #5 Estudo comprova que VACINA CAUSA AUTISMO. E agora?	no		1501861083	Referenciando	UCIu-GZ6a7B-IMyUs1rD629w	Science & Technology	752	35	7	0.2	0	22
WejhGCyrcFk	Modelando autismo com neurônios humanos: Alysson Muotri at TEDxFortaleza	no		1346186098	TEDx Talks	UCsT0YIqwnpJCM-mx7-gSA4Q	Science & Technology	17761	449	8	0.017817371937639	0	34
2e-rrr2qngc	Causas do autismo na infância e como reverter	no		1487516787	Alexandra Oliveira	UCzbZ2hMCEaD2QR5cMferrnQ	People & Blogs	2010	98	7	0.071428571428571	0	26
iTrbWxkX_ms	Autismo - Visão Espírita (01/04/2016)	no		1459537919	TV Mundo Maior	UCkrcoalvMERq3ehh5gH5j0Q	Entertainment	139632	4143	254	0.061308230750664	0	245
VzAlj6DPhGg	AUTISMO: Transtorno do Espectro Autista | NeuroSaber	no		1423093457	NeuroSaber	UCghJZXv-Cg90zgdeTZCt_-A	Entertainment	259788	8429	177	0.020998932257682	0	372
yG7zV2vHFdo	AUTISMO - SINTOMAS CAUSAS E TRATAMENTOS	no		1398291118	Wiki GLOBAL Pédia	UCYfLDf9dRO6SW0hO2nPewrw	People & Blogs	78782	999	54	0.054054054054054	0	39
RBzNKPxNiTQ	Autismo: teoria e prática	no		1452046403	Eli Vieira	UCil8_HWnWScf4Xmt4FSdU7w	Science & Technology	29607	734	16	0.021798365122616	0	42
KpPUoIDm0HY	Por que os movimentos antivacinas crescem em todo o mundo?	no		1554759636	DoutorMoises	UCW3l9WndLOjhRtsg0Aa--2g	Science & Technology	2224	175	10	0.057142857142857	0
d8zoCo67Qp8	Quando o Autismo não era tão evidente - breve relato sobre alguns sinais - NÓS E O AUTISMO	no		1471311259	Nós e o Autismo	UC-WaPlIfAQP3IuydN6dhbhA	People & Blogs	49576	1165	55	0.047210300429185	0	88
nT2rYAxXSYI	TRATAMENTO NATURAL- ELIMINAR MERCÚRIO DO CORPO DA VACINA AMARELA	no		1519505745	A farmácia de Deus com Lisa Santos	UCstv_dyLeuAbDB8ISTfkFbQ	People & Blogs	2883	306	2	0.0065359477124183	0	27
JFwAsQ7Bt54	Autismo Começa no Estômago - Cura e Prevenção	no		1434718198	LiberdadeNatural	UC1LRaE3XaXAanf1XJXgrVIw	Education	65801	2474	173	0.069927243330639	0	226
Fd5i-CJmhjs	COMO DESINTOXICAR SEU CORPO!!	no		1380597596	Ivandélio Sanctus	UCdKg0aioEqn_tbfBGz_ltFw	People & Blogs	964837	15068	609	0.040416777276347	0	2510
0ZYfsAYLtM8	Noni - 1 Segredo que você precisa saber.	no		1509113951	Maravilhas Di Noni	UCT913ORodTxCG9HdXroYPtQ	People & Blogs	60398	2733	160	0.058543724844493	0	163
bbO34r-BSbc	Novo tratamento para autismo | Edson Pacheco | TEDxJardinsSalon	no		1424468398	TEDx Talks	UCsT0YIqwnpJCM-mx7-gSA4Q	Nonprofits & Activism	81274	2809	99	0.035243859024564	0	246
3r1peJSTuwE	Cardápio predileto da Laurinha .	no		1504144218	SegredosDaLaurinha	UCGILPX9AE6hZpqp1FjFn6pw	People & Blogs	9417	339	8	0.023598820058997	0
4Xb4n7aINh8	Diagnóstico de autismo quais características que desconfiei.	no		1507069940	SegredosDaLaurinha	UCGILPX9AE6hZpqp1FjFn6pw	People & Blogs	1139325	35535	1330	0.037427887997749	0
AU6m_pShjAY	Superação da Laura 💙	no		1566949122	SegredosDaLaurinha	UCGILPX9AE6hZpqp1FjFn6pw	People & Blogs	7938	478	11	0.023012552301255	0	60
wKMaZieG8KI	Papo com Mãe: Como Descobri o Autismo e o que Fiz!	no		1510583248	Mayra Gaiato	UC42k7FI53tnSSIjgzW-rbLA	Education	49259	2858	33	0.011546536039188	0	105
3xMwoDFDY4I	Desfralde da Laura 🚽	no		1573256802	SegredosDaLaurinha	UCGILPX9AE6hZpqp1FjFn6pw	People & Blogs	939	120	0	0	0	2
RZmKXZoUKpY	3 milhões de crianças ainda não tomaram vacina contra sarampo e pólio	no		1535694835	Jornal da Record	UCmpHPgeCBgvk_fDXZQKsnAA	News & Politics	7602	70	11	0.15714285714286	0	0
_ayYtYkQXmY	#AUTISMO - Como superei a fase da negação luto até chegar na aceitação !	no		1508860987	SegredosDaLaurinha	UCGILPX9AE6hZpqp1FjFn6pw	People & Blogs	37523	1584	29	0.018308080808081	0
i4rbB9Q7fr8	Volta as Aulas - como se preparar para escola e escola para receber o Aluno.	no		1580431417	SegredosDaLaurinha	UCGILPX9AE6hZpqp1FjFn6pw	People & Blogs	295	28	0	0	0	1
hRPdQpU7NbA	Um Só Mundo Documentário Autismo	no		1397459506	Vivendo a Inclusão	UCqALeERk6OhLGaG_PIG_RJA	People & Blogs	285711	6998	133	0.019005430122892	0	391
mrQlfIX899E	Crianças do país devem se vacinar contra a poliomielite e sarampo	no		1415820182	TV BrasilGov	UCjaWLFTNqLkq3ZY2BJ4NYRg	News & Politics	191				0
hIytkbRz0n4	Tinus Smits: Vaccini e Autismo	no		1380963376	conmarc	UCGuv-PMjNhYc9wyZFr15ASg	Science & Technology	3126				0
1mDvH5GU5Ms	Sinais de autismo em bebês	no		1504559021	Andréa Werner	UC3lP5c55UE0ozG-uN0uBsXg	People & Blogs	515692	13294	325	0.024447119001053	0
xOgEVpswgEc	Ministério da Saúde reforça recomendação de vacina contra febre amarela e sarampo	no		1550222979	Jovem Pan News	UCP391YRAjSOdM_bwievgaZA	News & Politics	13086	95	7	0.073684210526316	0	10
OFkLSzHnA1k	Natal 🎅 abrindo os presentes 🎁 olha que presentão Papai Noel deixou 😱	no		1578267012	SegredosDaLaurinha	UCGILPX9AE6hZpqp1FjFn6pw	People & Blogs	571	44	1	0.022727272727273	0	0
byDvwdPn9Wk	Desfralde - S.O.S - dicas do que usar 🚽🧻🧴🧽	no		1576801791	SegredosDaLaurinha	UCGILPX9AE6hZpqp1FjFn6pw	People & Blogs	459	64	3	0.046875	0	2
F73lbO-gZJQ	Apresentação de Ballet - “A História que eu não escrevi”.	no		1577305448	SegredosDaLaurinha	UCGILPX9AE6hZpqp1FjFn6pw	People & Blogs	598	65	0	0	0	2
zdmcHpC_deU	Bosque 05 - Terapia Cease	no		1490718205	Bosque Oriri	UC2qRcwgwOLchPYFPqCCHVhQ	People & Blogs	1281	42	1	0.023809523809524	0	3
tGvIT4NvhqQ	Aniversário da Laura #Laurafez04 🎁🎂🎉🎀🎈💙	no		1579049407	SegredosDaLaurinha	UCGILPX9AE6hZpqp1FjFn6pw	People & Blogs	904	67	1	0.014925373134328	0	17
ACqRyArFS2k	Mitos e Crenças: A vacinação pode causar autismo nas crianças	no		1305201423	HMSPortugal	UC1VlEIPGhDqaUsL7Vg__hHA	Science & Technology	2260	10	1	0.1	0	3
x29zg72o9w0	Preparativos para Aniversário de 4 anos da Laura 🎂🎈🎁💙🎀	no		1578526025	SegredosDaLaurinha	UCGILPX9AE6hZpqp1FjFn6pw	People & Blogs	443	43	0	0	0	0
PSAkibifMNE	Rafael Superando o Autismo em 8 meses na Clínica de Reab.da Ilha - Método Padovan - Dr Marco	no		1451984938	Clínica da Ilha	UCYj7NQWLydGknpR7iQSmqwQ	Education	4920	85	3	0.035294117647059	0	2
LrvGBXxEm08	Viajando de avião ✈️ como a Laura se comportou 3 hs de voo .	no		1563572988	SegredosDaLaurinha	UCGILPX9AE6hZpqp1FjFn6pw	People & Blogs	1018	96	2	0.020833333333333	0	9
F6C68uVfrFs	Governo lança campanha de vacinação para conter casos de sarampo em Roraima	no		1520427402	Jovem Pan News	UCP391YRAjSOdM_bwievgaZA	News & Politics	431	14	2	0.14285714285714	0	3
r-ZFT9Hd4BQ	Beto Carreiro 🎡🎢🎠 muita diversão no Parque	no		1572568770	SegredosDaLaurinha	UCGILPX9AE6hZpqp1FjFn6pw	People & Blogs	378	30	0	0	0	0
W8cAkwxstss	Alfabeto	no		1564526005	SegredosDaLaurinha	UCGILPX9AE6hZpqp1FjFn6pw	People & Blogs	1432	111	2	0.018018018018018	0	24
YCmlAk-pd94	Maragogi - Passeio de buggy Até Praia Antunes 🏖	no		1564005079	SegredosDaLaurinha	UCGILPX9AE6hZpqp1FjFn6pw	People & Blogs	704	34	2	0.058823529411765	0	1
XLlTEjaeAqI	Massinha caseira - Laura fez massinha 🤩	no		1566004609	SegredosDaLaurinha	UCGILPX9AE6hZpqp1FjFn6pw	People & Blogs	1074	95	2	0.021052631578947	0	10
6Vo4Tc6PcwA	[MP 5/11] Mitos sobre Autismo: Neurônios espelho Vacinas Dom raro?	no		1518361201	Universo da Psicologia TV	UC05bDtSYUcR0nLkzFA1mCVQ	Education	1123	47	4	0.085106382978723	0	7
cQarbJDJTVE	Homeopatia no Autismo Fundamentos Dra Georgia	no		1540832809	Georgia Fonseca	UClqvSr61scd7sRpMdSFj62A	People & Blogs	1367	70	1	0.014285714285714	0	4
4txrPUCUmu4	COMO CURAR 90% DAS INFLAMAÇÕES ! IVANDÉLIO SANCTUS	no		1402963568	Ivandélio Sanctus	UCdKg0aioEqn_tbfBGz_ltFw	People & Blogs	1065690	17197	1068	0.062103855323603	0	1304
8YaxFVX1Xe0	Sonho realizado 👑😇	no		1491320583	SegredosDaLaurinha	UCGILPX9AE6hZpqp1FjFn6pw	People & Blogs	751	48	1	0.020833333333333	0
6g4PmZrEbTA	Autismo em Evidências - Apresentação e primeiro pronunciamento	no		1510546854	Autismo em Evidências	UCJUhAFvFypnG_E7vWimQQYw	Nonprofits & Activism	2027	115	4	0.034782608695652	0	22
IJBxFN6E6fc	O Autismo é recuperável!!! Está acontecendo com meu filho e pode acontecer com o seu.	no		1553484341	Rita de Cássia Barbosa Pereira	UCXgXvBPiPhzjfx4dxDemDCQ	People & Blogs	257	17	0	0	0	8
KJBrTZiqPag	Autismo e homeopatia	no		1489701046	Amarilys Toledo Cesar	UC5xF-T4J_uM0NrCkOO5e0PQ	People & Blogs	3113	96	5	0.052083333333333	0	23
asoEzJGQ2Wc	PAPO SAUDE AUTISMO WEB BL 1	no		1510588715	Papo Saúde Unifor	UCWJh6eAkARp1XWCrqNxsRWQ	People & Blogs	186	9	0	0	0	0
TaBrsDdt-z8	O que aconteceria com quem viajasse no tempo? | Nerdologia	no		1534430736	Nerdologia	UClu474HMt895mVxZdlIHXEA	Science & Technology	569604	69188	567	0.0081950627276406	0	1554
ILQoi0ZVnq4	ARANHAS PEIDAM? SQP 6 | BláBláLogia	no		1578060004	BláBláLogia	UC3Ooj_iDWELBumIEDejyNHQ	People & Blogs	3429	759	10	0.013175230566535	0	25
m5FXxUZ16ao	OVO ou A GALINHA? - 120segundos 03 | BláBlálogia	no		1524499055	BláBláLogia	UC3Ooj_iDWELBumIEDejyNHQ	People & Blogs	8213	1695	8	0.0047197640117994	0	105
yVlSGmmIF4U	UNICÓRNIOS PEIDAM? SQP 11 | BláBláLogia	no		1581086531	BláBláLogia	UC3Ooj_iDWELBumIEDejyNHQ	People & Blogs	2185	504	2	0.003968253968254	0	34
vdDAawDIGgo	Por que aves são dinossauros e pterossauros não são? (#Pirula 261)	no		1534108979	Canal do Pirulla	UCdGpd0gNn38UKwoncZd9rmA	Science & Technology	175285	19697	166	0.0084276793420318	0	1248
8xS8L5A1Zcg	PEIXES PEIDAM? SQP 4 | BláBláLogia	no		1576763887	BláBláLogia	UC3Ooj_iDWELBumIEDejyNHQ	People & Blogs	3178	697	4	0.0057388809182209	0	25
UP2vSGXK0UY	POR QUE ELEFANTES TEM ORELHAS TÃO GRANDES? 120segundos 49| BláBláLogia	no		1576681207	BláBláLogia	UC3Ooj_iDWELBumIEDejyNHQ	People & Blogs	4635	1122	2	0.0017825311942959	0	35
G3aze7ECbPU	BRIDGE: Jogo de baralho sem sorte! | #BoaTemática 40 | Blablálogia	no		1533225292	BláBláLogia	UC3Ooj_iDWELBumIEDejyNHQ	People & Blogs	9589	780	9	0.011538461538462	0	39
SlsHN-OWCkw	Revolta da Vacina | Nerdologia	no		1534255202	Nerdologia	UClu474HMt895mVxZdlIHXEA	Science & Technology	231120	27740	156	0.0056236481614996	0	1325
9Ujp1z38ggw	BURACOS NEGROS PEIDAM? SQP 2 | BláBláLogia	no		1575644411	BláBláLogia	UC3Ooj_iDWELBumIEDejyNHQ	People & Blogs	3425	802	7	0.0087281795511222	0	36
GVZ_YGr2m5o	Por que existem ingredientes tóxicos nas vacinas? | Minuto da Terra	no		1464703200	Minuto da Terra	UCB0zinWfy-dS_NqcOINYo3A	Science & Technology	133143	8055	64	0.0079453755431409	0	196
V9mUzKVpWzQ	SOLUÇO! - 120segundos 14 | BláBláLogia	no		1534544061	BláBláLogia	UC3Ooj_iDWELBumIEDejyNHQ	People & Blogs	7822	1603	6	0.0037429819089208	0	36
yX-_O6Nkwmc	MEDULA! - 120segundos 11 | BláBláLogia	no		1533638990	BláBláLogia	UC3Ooj_iDWELBumIEDejyNHQ	People & Blogs	8927	1606	5	0.0031133250311333	0	73
g6h35inNHWU	BALEIAS PEIDAM? SQP 3 | BláBláLogia	no		1576249210	BláBláLogia	UC3Ooj_iDWELBumIEDejyNHQ	People & Blogs	3233	742	9	0.012129380053908	0	22
TYJicd-0j78	Vamos Tocar o Sol - Guia do Espaço S02E17 | Bláblálogia	no		1533913093	BláBláLogia	UC3Ooj_iDWELBumIEDejyNHQ	People & Blogs	3801	872	2	0.0022935779816514	0	25
d5alV7W-Rbc	Um Passo Mais Perto da Vacina da AIDS [Mural de Notícias]	no		1534466813	Mural Científico	UC0ABb9XMjG8M_rmxbxtW6Qw	Science & Technology	7770	289	24	0.083044982698962	0	30
Bdr5V1eI4po	BOCEJO! - 120segundos 10 | BláBláLogia	no		1529338652	BláBláLogia	UC3Ooj_iDWELBumIEDejyNHQ	People & Blogs	7184	1547	3	0.0019392372333549	0	55
3QujLRhKiow	GIRAFAS PEIDAM? SQP 5 | BláBláLogia	no		1577458387	BláBláLogia	UC3Ooj_iDWELBumIEDejyNHQ	People & Blogs	3503	578	2	0.0034602076124567	0	34
-5kxXhv7r7A	Museus irados! | Nerdtour Rússia	no		1534433682	Jovem Nerd	UCmEClzCBDx-vrt0GuSKBd9g	Entertainment	253776	20783	134	0.00644757734687	0	544
csgd5OCd3_U	Os Rapanui - Curiosity 28 | BláBlálogia	no		1512479414	BláBláLogia	UC3Ooj_iDWELBumIEDejyNHQ	People & Blogs	86245	9095	86	0.0094557449147883	0	367
tUjSyGuprTs	Vacinas são mesmo perigosas pra você? | Minuto da Terra	no		1466776805	Minuto da Terra	UCB0zinWfy-dS_NqcOINYo3A	Science & Technology	173199	9483	82	0.0086470526204788	0	424
o5knNdjtCS4	VACINAS | Notícias da Garagem	no		1534514405	Dragões de Garagem	UCbrt8UdV49AqgT7-VaXmlwQ	Science & Technology	1170	206	2	0.0097087378640777	0	10
HAf-Ggtfr0M	APROVEITANDO MELHOR O OXIGÊNIO! - SlowNews 7	no		1476806291	BláBláLogia	UC3Ooj_iDWELBumIEDejyNHQ	People & Blogs	22136	3783	15	0.0039651070578906	0	78
tMTk5OVMkDc	POR QUE MONTAMOS ÁRVORES DE NATAL? 120segundos 50 | BláBláLogia	no		1577195272	BláBláLogia	UC3Ooj_iDWELBumIEDejyNHQ	People & Blogs	3222	855	2	0.0023391812865497	0	28
ngOGHG1ZM5k	RESFRIADO! - 120segundos 08 | BláBláLogia	no		1528213131	BláBláLogia	UC3Ooj_iDWELBumIEDejyNHQ	People & Blogs	7107	1761	8	0.0045428733674049	0	58
jfIFrPTWQYc	Nada de Matéria Escura Por Enquanto - Guia do Espaço S02E16 | Bláblálogia	no		1533162419	BláBláLogia	UC3Ooj_iDWELBumIEDejyNHQ	People & Blogs	3657	846	4	0.0047281323877069	0	43
9QgOyz5FXI8	Nosso Filho Autista - O Impacto da Notícia para o Papai	no		1532181601	Nosso Filho Autista	UC_KM4nWgBGGe-fsLpTh5G8g	People & Blogs	176	37	0	0	0	3
o6r7sc9WTYg	POR QUE SOMOS DIFERENTES? - 120segundos 05 | BláBláLogia	no		1526312302	BláBláLogia	UC3Ooj_iDWELBumIEDejyNHQ	People & Blogs	7363	1594	10	0.0062735257214555	0	63
mhe5e2B9bL8	Machine Learning: como ensinar uma máquina a aprender | Nerdologia Tech	no		1535637605	Nerdologia	UClu474HMt895mVxZdlIHXEA	Science & Technology	306595	34850	171	0.0049067431850789	0	670
gGKOiyme7rI	O segredo do sucesso dos dinossauros (#Pirula 260)	no		1533914626	Canal do Pirulla	UCdGpd0gNn38UKwoncZd9rmA	Science & Technology	152716	18023	160	0.0088775453587083	0	872
vI6xnENcHWs	Fabiana Scaranzi - Entrevista Dr. David Uip - a importância das vacinas	no		1429127641	Canal Fabiana Scaranzi	UC_Z84H0f59mA9EuC5mlv6og	People & Blogs	477	6	1	0.16666666666667	0	1
v6LnPz7P09c	RAIOS CÓSMICOS ATINGEM TRIPULANTES EM VOO? EP. 333	no		1535042387	Aviões e Músicas	UCLXl1V6n82Dyg1VhVgSL0nw	Science & Technology	178229	35891	220	0.0061296703909058	0	815
2p9vqg8_Hsk	Por que existe gente antivacinas? (OU: o tempo algoz das memórias) (#Pirula 267)	no		1538103407	Canal do Pirulla	UCdGpd0gNn38UKwoncZd9rmA	Science & Technology	126844	17986	321	0.017847214500167	0	1703
DUgE8y3gflQ	A HISTÓRIA DA INFORMAÇÃO - Há Ideia 1 | BláBláLogia	no		1533830402	BláBláLogia	UC3Ooj_iDWELBumIEDejyNHQ	People & Blogs	4630	987	6	0.0060790273556231	0	53
MP9dOowjgY4	#1 [Origem Enfermidades] Elementais Miasmas Implantes	no		1448654795	Harumi Kawazu	UCcI3UJ_rLFMKUrN-b1GW5kQ	People & Blogs	4661	361	1	0.0027700831024931	0	18
UiYhn2bAiBM	VACINANDO UM PAÍS TODO | BláBláLogia #SemanaDaVacina	no		1534515201	BláBláLogia	UC3Ooj_iDWELBumIEDejyNHQ	People & Blogs	3877	812	6	0.0073891625615764	0	25
vhtXEZHszhI	Somos um grande rebanho? | DispersCiência #46	no		1534464939	Dispersciência	UCUgarxqakK33XeFA4nHG2HA	Education	924	204	1	0.0049019607843137	0	6
BPKG_l2NcGc	O Dia em que Criamos um Segundo Sol na Terra	no		1535048916	Ciência Todo Dia	UCn9Erjy00mpnWeLnRqhsA1g	Science & Technology	1531294	161246	1671	0.010363047765526	0	4535
n3hp5s30X50	Um Tiro pra Cima Pode Acertar a Lua? | Primata Falante	no		1507091197	Primata Falante	UC876uazcW8p7wdl3JdbVIaA	Science & Technology	35669	5218	56	0.010732081257187	0	411
waMAGV5WxAU	ASSISTA: MINISTRO DE BOLSONARO TARCÍSIO IMPRESSIONA COM PROJETOS AUDACIOSOS PARA O BRASIL	no		1581142886	Ficha Social	UC65OaKMLtpEUs9BiLSb_u1g	News & Politics	12334	2089	22	0.010531354715175	0	8
IapcRrvYZCU	E PELA UNIÃO DE SEUS PODERES.... | #SemanaDaVacina	no		1534111202	O Fisico Turista	UCV8ZgEjwdNnZC4_FJtdDFCg	Education	2191	441	3	0.0068027210884354	0	18
UEvjtTtJPrk	A PÁSCOA! | Canal do Slow #24	no		1459180348	Canal do Slow	UCl10NIdDOn9MMWdKNyo_YdA	People & Blogs	53482	6294	38	0.0060374960279631	0	262
n9NgH1ZkX_U	Vídeo 4: campanha de combate ao preconceito à crianças com autismo	no		1547998557	Canal Tribunna	UCqZED4i9O2lBwNZ24bJ91ew	News & Politics	124	3	0	0	0	0
y_1phJASz9I	Como Funciona a Vacina? - #SemanaDaVacina | Casal de Imaginários	no		1534638488	Casal de Imaginários	UC7nrDOILJlfqGB8gX0F4jhQ	Film & Animation	140	25	0	0	0	6
gMezTlCp88M	A FALSA REPRESENTATIVIDADE! | Canal do Slow	no		1457645487	Canal do Slow	UCl10NIdDOn9MMWdKNyo_YdA	People & Blogs	44222	6701	38	0.0056707954036711	0	353
80oI-ZbYsUY	ATORES QUE FORAM LONGE DEMAIS POR UM PAPEL	no		1534276815	Refúgio Cult	UCflCE9dixPqeC_EaSqQAqrw	Entertainment	222496	12080	186	0.015397350993377	0	592
6hvAciLsm-Y	Cientistas Conseguem INVERTER Seta do TEMPO Em Experimento | AstroPocket	no		1534194000	Canal do Schwarza	UCWq1xltHB2fDe6YkYoOrryg	Entertainment	98148	15540	319	0.020527670527671	0	493
V9DcNJT1-Dk	3 Teorias Sobre o que Existe do Lado de Fora do Universo | AstroPocket	no		1534808904	Canal do Schwarza	UCWq1xltHB2fDe6YkYoOrryg	Entertainment	299282	36742	493	0.013417886886941	0	1482
LJfnAXscLEM	Um NOVO incomoda muita gente	no		1535147100	Ideias Radicais	UC-NwgkrLPYmzM-xoLr2GX-Q	Education	113387	14773	897	0.060718879036079	0	2073
oka3nDGnKGU	Aquias Santarem Ao vivo!	no		1581125263	Aquias Santarem - CRITICA BRASIL	UC96qopSyu7Ga75jW3HEO88w	News & Politics	14245	2685	31	0.011545623836127	0	57
3BL9GIPxJQw	Vacinas - parte 1#SemanaDaVacina (Repostado)	no		1534187499	Olho de Rapina	UCjeezibK8QMXYalufkuuSXg	People & Blogs	237	50	2	0.04	0	14
_u3_qShtWXg	UFÓLOGOS E AS TEORIAS SOBRE NIBIRU by Milena Souza	no		1581130573	FLAVIO VALLE	UCstACT0WwMpTjTrbpFYk16Q	Entertainment	8470	914	56	0.061269146608315	0	58
2RV4NaG5a5U	Queimadas na Amazônia chocam o mundo	no		1566784052	Domingo Espetacular	UCP-Vg2PcmLiWpEdvMI1R35w	Entertainment	93056	2221	149	0.067086897793787	0	542
pkIFdGw5myI	Tudo o que você precisa saber sobre o sarampo	no		1565805704	TV Aparecida	UCfYrK5JU5EznsnK3wQE7iIg	Entertainment	10077	178	10	0.056179775280899	0	9
1kkhHOZAJHk	Especialista explica razões que levaram à queda da imunização de algumas doenças no Brasil	no		1504362771	Record News	UCuiLR4p6wQ3xLEm15pEn1Xw	News & Politics	3000	131	1	0.0076335877862595	0	2
ofFb1CBkMPM	Você e o Doutor explica tudo sobre o sarampo	no		1564590927	Hoje em Dia	UCN-opsqqDunWO6h5uCp9Y4g	Entertainment	73658	1472	76	0.051630434782609	0	44
xEcZiBZ_Bqc	Uma armação pode ter colocado José Luiz atrás das grades por tráfico de drogas	no		1581046850	RECORD TV	UCu_a6PAzp30Bn2mM-Ll09LA	News & Politics	2114	71	0	0	0	0
0Xfn28ymm3Q	Entenda como ocorre a transmissão do vírus do sarampo	no		1566218767	RECORD TV	UCu_a6PAzp30Bn2mM-Ll09LA	News & Politics	7671	243	10	0.041152263374486	0	9
hccg0i27AHc	VACINAÇÃO DO IDOSO | SÉRIE SAÚDE BRASIL	no		1465411571	Tv Saúde Brasil	UC4MWeXk20bRyIGQsiZXPe6Q	Education	8188	123	12	0.097560975609756	0	8
qvG0irvya8k	Tratamento pode ter curado paciente do vírus HIV	no		1551899233	Record News	UCuiLR4p6wQ3xLEm15pEn1Xw	News & Politics	13389	365	10	0.027397260273973	0	31
S4QEEbQCjeE	CRISE DA VACINAÇÃO NO BRASIL: PREVENÇÃO DE DOENÇAS E SAÚDE PÚBLICA | Atualidades e Tema de Redação	no		1534255794	Curso Enem Gratuito	UC_53VGoH_0XLFmYVpGMvhvg	Education	24361	794	36	0.045340050377834	0	72
j0BGi-GhU1c	Especialistas tiram dúvidas sobre o surto de sarampo no Brasil	no		1566218858	RECORD TV	UCu_a6PAzp30Bn2mM-Ll09LA	News & Politics	4085	168	6	0.035714285714286	0	20
D4NMNsGw4Mw	Nova campanha de vacinação contra o sarampo começa nesta segunda (7)	no		1570465030	Hoje em Dia	UCN-opsqqDunWO6h5uCp9Y4g	Entertainment	4426	61	4	0.065573770491803	0	2
brDeZrzZg3U	Começa a campanha de vacinação contra Sarampo em São Paulo	no		1560211929	TV BrasilGov	UCjaWLFTNqLkq3ZY2BJ4NYRg	News & Politics	1185				0	0
PKqyuLpoO-8	Bebê fica na UTI após contrair sarampo da mãe	no		1565967100	Hoje em Dia	UCN-opsqqDunWO6h5uCp9Y4g	Entertainment	10539	288	14	0.048611111111111	0	26
LImubYDcAfA	Movimento anti vacinação vem provocando a volta de doenças já erradicadas e epidemias	no		1393339031	Jornalismo TV Cultura	UCXdXYG8dUmEv6jhEji_lSHg	News & Politics	7938	151	20	0.13245033112583	0	0
Z934SrUHvLs	Vacinação contra o sarampo é prorrogada até sábado (31) em SP	no		1567103047	Hoje em Dia	UCN-opsqqDunWO6h5uCp9Y4g	Entertainment	6385	67	7	0.1044776119403	0	6
DULzIpTW9TA	Profissional de saúde - Saiba como identificar e prevenir o sarampo	no		1535119929	Ministério da Saúde	UC12zKGLhMhDeDidoctM6BrA	Nonprofits & Activism	41446	632	47	0.074367088607595	0	22
TP-7tk1hOxs	VACINAS NO BRASIL | DOSE DE ATUALIDADES | DESCOMPLICA	no		1571580002	Descomplica	UCT0JugAtGmqiYkwxFZOwAtg	Education	80680	8887	44	0.0049510520985709	0	212
iCoBbzfFZXw	Tire todas as dúvidas sobre o sarampo e a campanha de vacinação	no		1563991555	Catraca Livre	UCv2svvDbMNunUuPs8hUUKVA	News & Politics	74884	1326	105	0.079185520361991	0	88
myFRMfxeMYY	Vacinação contra sarampo é ampliada no estado de São Paulo	no		1565477745	Band Jornalismo	UCoa-D_VfMkFrCYodrOC9-mA	News & Politics	2745	32	3	0.09375	0	3
WolGMQihlcU	ROTINA + ARRUME-SE COMIGO PARA FESTA DO DIA 7 DE SETEMBRO - CHAYLLA ALAX	no		1568049466	Vlog Da Chaylla Alax	UCJWBZ_U49wLgqS5fefJ7STw	People & Blogs	40072	2496	129	0.051682692307692	0
KwUTREs8g0k	Crianças de 6 meses um ano devem se vacinar contra o sarampo	no		1566399717	TV BrasilGov	UCjaWLFTNqLkq3ZY2BJ4NYRg	News & Politics	8185				0	2
8_ENxZX8YjE	Ministério da Saúde intensifica vacina contra o Sarampo	no		1562891067	TV BrasilGov	UCjaWLFTNqLkq3ZY2BJ4NYRg	News & Politics	3247				0	0
g6HEYuT62wc	Vacinação no Brasil: saiba tudo sobre esse possível tema de redação Enem 2019! - Imaginie	no		1569931212	Imaginie	UCAcUmC0FOroQoAWA5TlX1-g	Education	1934	178	1	0.0056179775280899	0	7
dyDmsHW4iVE	Vacinação contra sarampo e paralisia infantil continua até 31 de Agosto	no		1534982323	TV Canção Nova	UCVrKQMmA2ew9LFzeIDaOFgw	Entertainment	14781	153	9	0.058823529411765	0	0
3zIZZeuwW6w	Secretaria Estadual de SP vai ampliar imunização contra sarampo	no		1562885042	TV Canção Nova	UCVrKQMmA2ew9LFzeIDaOFgw	Entertainment	9767	127	7	0.05511811023622	0	0
2F_Htynbq60	Equipe de saúde vão às ruas para dar vacina contra o sarampo em SP	no		1567103080	Hoje em Dia	UCN-opsqqDunWO6h5uCp9Y4g	Entertainment	8148	109	10	0.091743119266055	0	15
u1pt84rNlIQ	Vacinação contra o sarampo chega às escolas de São Paulo	no		1563899337	Fala Brasil	UCwVmZjJwkCUCOes5_eAIebg	News & Politics	4176	66	4	0.060606060606061	0	16
BhgqmXTZ5_c	Governo inicia campanha de combate às Fake News sobre vacinação	no		1537921122	TV Canção Nova	UCVrKQMmA2ew9LFzeIDaOFgw	Entertainment	2107	65	5	0.076923076923077	0	0
pNNry6WtDGQ	Pai explica por que proíbe que o filho seja vacinado	no		1566208938	Câmera Record	UCp6tx5isUZCgQnvEwbOVC-Q	People & Blogs	4686	154	55	0.35714285714286	0	442
tnfVjLH0ZsA	Única prevenção contra sarampo é a vacina alerta especialista	no		1554555783	Jovem Pan News	UCP391YRAjSOdM_bwievgaZA	News & Politics	8526	322	17	0.052795031055901	0	12
PPWIZ_UFYcQ	Prefeitura de São Paulo amplia campanha de vacinação contra sarampo	no		1564185389	tvbrasil	UCSv9d0kQegylHWpP83jWSQg	Entertainment	540	9	1	0.11111111111111	0	0
Z6fZVn-Nbd8	Vacinação contra Sarampo é prioridade para jovens de 15 a 29 anos	no		1562099387	UNINOVE	UCm17GAihi4NAVEnA1n4WajQ	Education	7092	100	13	0.13	0	0
MAi8Beg8Tdk	Entenda como ocorre a transmissão do vírus do sarampo	no		1566208664	Câmera Record	UCp6tx5isUZCgQnvEwbOVC-Q	People & Blogs	5971	213	8	0.037558685446009	0	30
ALulSvxSL3o	Campanha de Vacinação contra o Sarampo - 20 a 29 anos	no		1574086690	Ministério da Saúde	UC12zKGLhMhDeDidoctM6BrA	Nonprofits & Activism	1929773	230	5	0.021739130434783	0	10
_Aw4OTlJmfs	Saiba mais sobre a importância da vacinação de crianças	no		1531526958	Governo do Brasil	UCOwuzVSWrrAdRIviGN7-T5g	News & Politics	3776	23	2	0.08695652173913	0
Zqdtp51PUys	Tudo sobre SARAMPO: Quais os sintomas? Como se transmite?	no		1565186409	DOUTOR AJUDA	UC1Nm7gQCcGvgLyVcGTXp-Ww	Education	4122	518	1	0.0019305019305019	0	23
NX5VDzK8N4c	Notícias falsas atrapalham vacinação contra o sarampo	no		1551290306	TV Canção Nova	UCVrKQMmA2ew9LFzeIDaOFgw	Entertainment	3973	126	12	0.095238095238095	0	0
atJ9tok0924	Notícias falsas na internet espalham boatos sobre perigos das vacinas	no		1508174053	Balanço Geral	UCqZN-NqgP7bhbctbyThSVUA	News & Politics	6480	168	106	0.63095238095238	0	179
9IciHcr6O6I	Aumento nos casos de sarampo reforça campanha de vacinação em SP	no		1563671549	Jornal da Record	UCmpHPgeCBgvk_fDXZQKsnAA	News & Politics	2358	31	5	0.16129032258065	0	1
j0eiwUX6-hc	Exemplo da importância da vacinação a história da tuberculose no Brasil	no		1559760817	Khan Academy Brasil	UCXj2oSzwg6G0iBjKg33joMQ	Education	2111	70	1	0.014285714285714	0	2
nr2L0toAObI	Campanhas de vacinação e a REDAÇÃO do Enem | Aprendi com o Papai	no		1533852007	Aprendi com o Papai	UCK6QegB9LU1tIsslcT6KVAA	Education	5281	410	3	0.0073170731707317	0	25
sI0_lbQnvBA	Campanha de vacinação contra gripe é prorrogada	no		1529017697	TV Canção Nova	UCVrKQMmA2ew9LFzeIDaOFgw	Entertainment	20668	114	26	0.2280701754386	0	0
JGicQ3TO2NQ	Ministério da Saúde inicia Campanha Nacional Contra o Sarampo	no		1570487545	TV Canção Nova	UCVrKQMmA2ew9LFzeIDaOFgw	Entertainment	2297	41	0	0	0	0
57tSQas4ViI	Alemanha quer multar quem não vacinar crianças contra sarampo	no		1557160041	euronews (em português)	UCUmEPYxmnyQDeRUcFkslmQw	News & Politics	16063	57	8	0.14035087719298	0	5
FaXFYHXXOhE	Aparição de Asher provoca ciúmes e revolta em Zac	no		1581101866	RECORD TV	UCu_a6PAzp30Bn2mM-Ll09LA	News & Politics	3834	118	4	0.033898305084746	0	3
FvXdDt1tj8A	DAR OU NÃO DAR A VACINA ROTAVÍRUS PARA UM BEBÊ APLV	no		1550957226	JulianaMaiaNutriAPLV	UCMPvF9GYUeAT3D-AjEpmd0A	People & Blogs	3381	148	2	0.013513513513514	0	31
MYXwn0dZfiU	Tobias perde o controle ao ver Donatella com José Antônio	no		1581025980	RECORD TV	UCu_a6PAzp30Bn2mM-Ll09LA	News & Politics	2384	89	1	0.01123595505618	0	2
fhfnIZE0Z5Q	Poderosa é flagrada na cama com Hugo durante discussão	no		1581101660	RECORD TV	UCu_a6PAzp30Bn2mM-Ll09LA	News & Politics	3183	113	1	0.0088495575221239	0	11
b7seHB40LtE	Câmera Record mostra os perigos do maior surto de sarampo das últimas décadas	no		1565931486	RECORD TV	UCu_a6PAzp30Bn2mM-Ll09LA	News & Politics	3150	158	6	0.037974683544304	0	3
_ues7HKLKVQ	DIA DE VACINA NO GAEL!	no		1566517448	Christian Figueiredo	UC1UHfW5LkMIlz6FHnEHbXlQ	People & Blogs	659705	78537	521	0.0066338159084253	0	5648
VS-k7Y3P6-I	#SpoilerDaTici: Rafael Ilha terá que cuidar de cinco crianças no Troca de Esposas	no		1581352849	RECORD TV	UCu_a6PAzp30Bn2mM-Ll09LA	News & Politics	1248	147	9	0.061224489795918	0	5
T1ZhkMW3Y74	José Luiz tem pistas sobre o verdadeiro suspeito e Niniks decide investigar	no		1581048044	RECORD TV	UCu_a6PAzp30Bn2mM-Ll09LA	News & Politics	2969	143	3	0.020979020979021	0	3
C7oOAbs-K_I	SARAMPO - Conheça a Doença que Ataca as Crianças	no		1531320055	Faz Bem Dicas de Saúde	UCoyhq57ClXRTd4h8vpiMelA	People & Blogs	11068	382	14	0.036649214659686	0	72
FYWOoaOqA1s	PIRULLA X LAIR - Dia que o Pirula se meteu com o Dr Lair Ribeiro	no		1509101308	U MIÓ QUE TÁ TENO	UC4F32QLrpDmmRrozxr9z59g	Science & Technology	286811	17904	3080	0.17202859696157	0
yX14Z9Wye1Q	SARAMPO - Como saber se é sarampo?	no		1531758392	Diário Natureba	UCrRLxJiZvwAAWj0bcxdvPAA	Howto & Style	6627	92	4	0.043478260869565	0	1
gxLUMgyWyF0	Como funciona a vacina contra a febre amarela?	no		1516734232	Canal USP	UCN1ihdoKXeixzYi7Hyp4WwQ	Education	7679	258	5	0.01937984496124	0	6
lDAgN3XoL-c	AS FARSAS DO HIV AIDS CÂNCER TIREÓIDE DOENÇAS PSIQUIÁTRICAS E DIABETES	no		1501266050	Muito Obrigado	UClbxmHMltUriVoElCp_izag	People & Blogs	19686	754	77	0.10212201591512	0	416
WVZQD2bNBKE	Comentário de Ricardo Boechat sobre a vacinação contra sarampo e pólio	no		1535759035	Band Jornalismo	UCoa-D_VfMkFrCYodrOC9-mA	News & Politics	2313				0	12
3-QcTEzounE	Coronavírus: Diplomata descreve operação de resgate de brasileiros da China	no		1581107546	BBC News Brasil	UCthbIFAxbXTTQEC7EcQvP1Q	News & Politics	169495	7696	222	0.028846153846154	0	1527
ZQgR2utCYEU	Os brasileiros que viveram a 2ª guerra mundial em Londres	no		1581252689	BBC News Brasil	UCthbIFAxbXTTQEC7EcQvP1Q	News & Politics	16386	2375	21	0.0088421052631579	0	180
ZrXBZRBJmTc	Amazônia perde ‘um campo de futebol’ de floresta por minuto	no		1562434858	BBC News Brasil	UCthbIFAxbXTTQEC7EcQvP1Q	News & Politics	19631	1510	141	0.093377483443709	0	295
p3sYeQekrlc	Sarampo: doença provoca manchas avermelhadas na pele	no		1349879092	Minha Vida	UCMYTIyqS1-7wT-3pBB8bR5A	Science & Technology	196346	1489	95	0.06380120886501	0	35
ghTSBrGT9a4	Coronavírus: 5 recomendações para se proteger	no		1580728700	BBC News Brasil	UCthbIFAxbXTTQEC7EcQvP1Q	News & Politics	133279	10378	158	0.015224513393717	0	763
xaQtrd_KKW0	Arminio Fraga: Minhas propostas me colocam à esquerda mas não esquerda que dá dinheiro para rico	no		1580767236	BBC News Brasil	UCthbIFAxbXTTQEC7EcQvP1Q	News & Politics	37887	1984	289	0.14566532258065	0	502
dZVPiR8fJB8	VACINA - POLÊMICA DA SEMANA	no		1541253605	Porta dos Fundos	UCEWHPFNilsT0IfQfutVzsag	Entertainment	1591837	120101	4011	0.033396890950117	0	4482
B89CHy4Hj6o	Brexit: O que muda no Reino Unido depois da saída da União Europeia	no		1580479002	BBC News Brasil	UCthbIFAxbXTTQEC7EcQvP1Q	News & Politics	193817	17609	290	0.016468851155659	0	1591
d3EF3vFkfug	Três estados vivem surto de sarampo: Pará Rio de Janeiro e São Paulo	no		1563062374	Jornal da Record	UCmpHPgeCBgvk_fDXZQKsnAA	News & Politics	1281	23	1	0.043478260869565	0	5
cdl4bDYzy6Y	Suspeita de sarampo no centro de SP é motivo de preocupação	no		1544093811	Jovem Pan News	UCP391YRAjSOdM_bwievgaZA	News & Politics	74339	431	57	0.1322505800464	0	34
lo8CyH_pHtw	Acordo Mercosul-União Europeia: o que se sabe	no		1561766603	BBC News Brasil	UCthbIFAxbXTTQEC7EcQvP1Q	News & Politics	59748	6455	109	0.016886134779241	0	832
37Tk7DV-F9E	Calendário de Vacinação 2019 - ATUALIZADO (COMPLETO) por Anii G.	no		1554948803	Anii G.	UCq8ChnGCYMVCzDgGMK9e91A	Science & Technology	20200	964	49	0.050829875518672	0	43
VM77Y3wVfss	Bolsonaro: Facada Fake? (Linguagem Corporal - Metaforando)	no		1536708896	Metaforando	UCh7TUTXojlE8vRtb-EnuDzw	People & Blogs	1181727	126048	4523	0.035883155623255	0	11474
i69_0QTigOU	Buy ou Bye? A armadilha das palavras em inglês que soam idênticas	no		1562341157	BBC News Brasil	UCthbIFAxbXTTQEC7EcQvP1Q	News & Politics	12461	1966	11	0.0055951169888098	0	139
vXpCTgNT9Q0	4 coisas bizarras que são permitidas em países	no		1546122602	Fatos Desconhecidos	UCbAiIkPobUFy71zlmwVw3jw	Entertainment	805636	60947	938	0.01539042118562	0	2094
G9XkAf9nGCo	A VIDA DA SUA FAMÍLIA ESTÁ EM RISCO NÃO É CLICKBAIT	no		1530479918	Felipe Neto	UCV306eHqgo0LvBf3Mh36AHg	Entertainment	1544806	209903	3529	0.016812527691362	0	14220
eZv0e_qSYbk	FAKE NEWS SOBRE VACINA - Ep. 1258	no		1534645253	Cadê a chave?	UCtrjFP7i92_30uv6IehwE5Q	Entertainment	418373	71561	2392	0.033426028143821	0	2303
Ybf72eLgMgc	Doria critica reeleição e diz que há 99% de chance de F1 não sair de São Paulo	no		1562685066	BBC News Brasil	UCthbIFAxbXTTQEC7EcQvP1Q	News & Politics	18164	741	147	0.19838056680162	0	179
Wgsj0TJGNXw	Reforma da Previdência: um resumo do que aconteceu até agora e os próximos passos	no		1562342682	BBC News Brasil	UCthbIFAxbXTTQEC7EcQvP1Q	News & Politics	167459	5397	255	0.047248471372985	0	628
5bnVu4Q2HUc	Sarampo provoca graves consequências à saúde	no		1560447129	Ministério da Saúde	UC12zKGLhMhDeDidoctM6BrA	Nonprofits & Activism	4661	96	1	0.010416666666667	0	2
eJYJYBodH6U	Gravidez só um mês após a vacina	no		1517521430	Jornal da Gazeta	UCNl_i-ggJbZNyOLlhE7yyhw	News & Politics	16867	117	5	0.042735042735043	0	9
5Y0WEJLljPs	Não compartilhe fake news	no		1538575656	Planalto	UCjjYaSHsZSUNTSwUV8OfOrA	News & Politics	1870149				0	2
Vlwu5oNhya4	Surto de Sarampo no Brasil | Atualidades - Brasil Escola	no		1547143203	Brasil Escola	UCsgHWN8lYveMUEWTDheTjZA	Education	3327	199	2	0.010050251256281	0	7
Lt8POvxQKqM	Por que os pais estão deixando de vacinar os seus filhos?	no		1535844368	Biologia de Verdade	UCyCMHHF9TRBEPhzDwDHDZEQ	Education	944	83	5	0.060240963855422	0	9
fzilpZotG9w	O garoto ANTI VACINA que SE DEU MAL	no		1561669637	Mundo Bizarro /Jr	UCPQqOZhDKr9AjLfXDOjoaww	Comedy	25992	3763	189	0.050225883603508	0	639
ex3POs_aOpQ	Sarampo é transmitido mesmo antes da doença se manifestar alerta diretora de imunização de SP	no		1563970108	Jovem Pan News	UCP391YRAjSOdM_bwievgaZA	News & Politics	3646	94	6	0.063829787234043	0	16
qCdgn65W_h0	Mulher pode ser presa por se recusar a vacinar o filho	no		1507054384	Balanço Geral	UCqZN-NqgP7bhbctbyThSVUA	News & Politics	3645	74	18	0.24324324324324	0	115
8qCo7siUcsI	Moro pede licença não remunerada: entenda	no		1562624123	BBC News Brasil	UCthbIFAxbXTTQEC7EcQvP1Q	News & Politics	25294	2144	349	0.16277985074627	0	535
O5TfVU5hEOo	DOCUMENTÁRIO: Mães Sem Nome: O Luto de Mulheres que perderam filhos.	no		1449018266	Bruno Dias Jornalista	UCbeCLZ2E_oD071BkTCw5uRQ	People & Blogs	19292	367	9	0.024523160762943	0	54
wJiCAxA_OFs	VACINAS QUE A GESTANTE PRECISA TOMAR | Gravidez	no		1552496408	Almanaque dos Pais	UCy7oVBYY0FGXeeJpy6ITXxQ	People & Blogs	19383	1827	22	0.012041598248495	0	159
boqb6FnNjio	Fake news sobre vacinação colocam população em risco	no		1538544051	Band Jornalismo	UCoa-D_VfMkFrCYodrOC9-mA	Entertainment	1321	30	7	0.23333333333333	0	5
qP5MxqNkLK0	O que aconteceu com a GAROTA mais pesquisada no GOOGLE?	no		1559250803	Mundo Bizarro /Jr	UCPQqOZhDKr9AjLfXDOjoaww	Comedy	868332	22910	512	0.022348319511131	0	1217
YEkJKC5mgBs	VACINAS Ele dissse tudo ISSO!! sob juramento em um tribunal (INCRÍVEL E TENEBROSO)	no		1558353623	nutrição Alimentos & Cia	UCQNi2fXhCHRu8-b-w29SMCA	Education	173683	10439	477	0.045694031995402	0	1233
QS2WGGgJcqY	ME CASEI E TIVE QUE FAZER ISSO NO MEIO DA RUA!!!	no		1562424840	Juliana Priscila	UCLWAkPY5RjvCuwJu_C3Ok-A	People & Blogs	761410	43610	1034	0.023710158220592	0	783
xYDHcutf2wU	NÃO ACREDITO QUE PASSEI ESSA VERGONHA - Os Meninos viram tudo*	no		1562621817	Juliana Priscila	UCLWAkPY5RjvCuwJu_C3Ok-A	People & Blogs	374341	33137	656	0.019796601985696	0
pCcUsJFEIpk	Quando MENTES para conseguir TRABALHO	no		1562882336	Mundo Bizarro /Jr	UCPQqOZhDKr9AjLfXDOjoaww	Comedy	300410	20623	218	0.010570722009407	0	817
URS-z9xm5SY	Vacinação contra o sarampo é ampliada para bebês	no		1565188613	Fala Brasil	UCwVmZjJwkCUCOes5_eAIebg	News & Politics	1269	15	3	0.2	0	0
e_y9SGwaqYo	ENTREVISTA: MÉDICA EXPÕE A VERDADE POR TRÁS DO MAIS MÉDICOS	no		1542380531	Terça Livre TV	UC7qK1TCeLAr8qOeclO-s39g	News & Politics	183710	24594	321	0.013051963893633	0	1249
FhyyLC7YiZE	Não vacinar os filhos pode causar perda da guarda das crianças	no		1531578344	Fala Brasil	UCwVmZjJwkCUCOes5_eAIebg	News & Politics	3638	69	70	1.0144927536232	0	166
nNljnxfpOBg	O Bolsonaro precisa falar e reagir e o impíchi do ministro.	no		1581129774	Fabio Click Time	UCQz-h9kq50OxKmU2yGoOWlg	News & Politics	7228	1755	50	0.028490028490028	0	112
YPVT4YtduaM	A Maior Dor...	no		1562590805	Mamaefalei	UCkSjy-IOEq-eMtarZl2uH1Q	People & Blogs	362917	53832	751	0.013950809927181	0	2571
uHpH5i3QHgI	LULA NÃO ESTÁ PRESO!!!	no		1523318799	Rômulo Maraschin	UCSyUhW3u3JazIT3VtE4nCEw	News & Politics	192365	11675	1530	0.13104925053533	0
KOYLsIYZKrI	BOLSONARO E A REDUÇÃO POPULACIONAL DA AGENDA 2030 EM DAVOS	no		1548348393	Firmeza da Verdade	UCr0NQAx7C64fOrNxVdc8gYA	People & Blogs	432909	16330	3293	0.20165339865279	0
5GJqNDmSSjE	Microcefalia foi causada por vacinas contra rubéola? Será que é verdade? #3	no		1457725099	LAbI UFSCar	UCml_Re6YwhQAI-F4Rwtlqdw	Science & Technology	943	19	3	0.15789473684211	0	0
1h-GFxiWfs8	As principais doenças autoimunes	no		1329364842	Hospital Israelita Albert Einstein	UCK0SYPK1n9055P-JjLkOZJw	Science & Technology	86570	1111	32	0.028802880288029	0	66
jBZPn4PJhZg	Caxumba provoca inchaço doloroso das glândulas salivares	no		1349879335	Minha Vida	UCMYTIyqS1-7wT-3pBB8bR5A	Science & Technology	367936	1880	117	0.062234042553191	0	195
yK0RRQYVFKM	Doenças exantemáticas - Parte 1 (sarampo e rubéola) - Aula SanarFlix	no		1518469888	Medicina Resumida	UCE0KRm8m9_ki8MrMYGyjpAw	Education	23260	609	17	0.027914614121511	0	25
7S_nVuXgl3g	Rubéola: risco que as gestantes não precisam correr	no		1487785820	Ministério da Saúde	UC12zKGLhMhDeDidoctM6BrA	Nonprofits & Activism	15739	177	11	0.062146892655367	0	1
qNWrAwOIQMQ	Rubéola	no		1399380313	FESP em Açao	UCn_lk0txtL2jH6NoVPMb3XA	Education	2263	25	1	0.04	0	0
URv5SUCrAK8	Sarampo e suas complicações	no		1309375160	Wolmar Carregozi	UC45WrWwAypYvlhYbuG9UNqQ	Science & Technology	18179	79	8	0.10126582278481	0	3
DMIKW7Ev458	Gestantes devem seguir calendário de vacinas para evitar sequelas de doenças no bebê	no		1533765735	TV BrasilGov	UCjaWLFTNqLkq3ZY2BJ4NYRg	News & Politics	7673				0
qfdRzSIL7AQ	GESTANTES DEVEM SE VACINAR?	no		1537239802	Beep Saúde	UCzzv3f3UIhYZlIeuOl2QH9Q	Science & Technology	26568	165	47	0.28484848484848	0	6
Yp0TLn9t97o	Rubéola: ínguas e manchas na pele são características da doença viral	no		1349879173	Minha Vida	UCMYTIyqS1-7wT-3pBB8bR5A	Science & Technology	270086	1033	100	0.096805421103582	0	35
J-1GNl81nKU	Vacinação na Gravidez	no		1524258122	Dra. Graciela Morgado	UCeoHCxOOPTeT9Pp_qi8HmHg	People & Blogs	597	21	0	0	0	1
fs5KD794GFk	Vacina para Febre Amarela na Gestação	no		1516406353	Dr. Igor Padovesi	UC3O9y5JRSBqn4YhCEvBys_Q	People & Blogs	7716	446	2	0.0044843049327354	0	27
MtatgSyY974	Engravidei e agora? - parte 01	no		1485800556	DoutorMoises	UCW3l9WndLOjhRtsg0Aa--2g	Science & Technology	2564	122	0	0	0
1_NTw6rw0o0	Sarampo	no		1521533464	Direção-Geral da Saúde	UCNmv_2YqryuyhB79ehzOsmQ	Nonprofits & Activism	7286				0
nxMADfTA5u8	Vacinação contra Caxumba no Campus II	no		1445279581	PUC-Campinas	UCP3OzsCj60Z9kZlBPOFXh9Q	Education	1113	4	0	0	0	0
WFzBEjQtqPU	A falta de ar e as emoções!	no		1368457347	Vida Melhor	UCCD5yY6oDcu-PvLnP4FIJ8A	Entertainment	69974	1383	51	0.036876355748373	0	93
VCAD37r9tHU	Catapora sarampo e caxumba	no		1489684291	Hospital de Base	UCJlShHvhjZ464BnJ8yrkeJA	News & Politics	4422	63	3	0.047619047619048	0	1
UmVCbIKMfIw	Saiba mais sobre Asma e Bronquite	no		1374780302	Vida Melhor	UCCD5yY6oDcu-PvLnP4FIJ8A	Entertainment	205114	4286	194	0.045263649090061	0	152
_ODjdS-0fwA	Alerta - Gestantes precisam tomar a vacina contra a coqueluche	no		1500584021	Legislativo PI	UCcVeBJf9jm5xgZbs7rrLUPQ	Entertainment	799	4	0	0	0	0
Kt25U-cYXGI	Catapora: seus sintomas causas e prevenção - Vida e Saúde	no		1349209234	Unimed Fortaleza	UCUtDAMp91VCfHTZ9_ypKRPA	People & Blogs	240601	3100	177	0.057096774193548	0	295
PPIa3dDxzEE	Autismo Leve	no		1523541671	Mayra Gaiato	UC42k7FI53tnSSIjgzW-rbLA	Education	92993	6249	105	0.016802688430149	0	269
0RC92hLDbEk	Cícero Coimbra fala sobre vitamina D na gestação e zika vírus	no		1486118941	Jolivi Saúde	UCzDQaYfHMJrXfw46whk6hIg	Education	23745	935	12	0.01283422459893	0	57
bUSP4ARY_dk	#30 - Vacinas causam autismo? Sarampo? E muito mais...	no		1523183401	Podcast 2.1	UCNX-i6w11LltMBn66PacOfQ	Entertainment	579	12	1	0.083333333333333	0	1
KQb7HJAgGxw	História da Vacina	no		1457539615	Lais Biolog	UCDbSk1EuJeXL2sCis8cvo-g	People & Blogs	36062	381	27	0.070866141732283	0	31
4-vKMhOABRg	ASMA E BRONQUITE-saiba tudo a respeito e como lidar	no		1312235945	marcoaurelionunes1	UCcSJI9MVSPEhKt5OnOv2Mdw	People & Blogs	132646	921	58	0.062975027144408	0	39
4ni_AxqxkCU	Bate-Papo Atividade Física e Envelhecimento	no		1569939808	Scio Education	UCyuDCBA1ig-x1YeAQBX2b4g	Education	85	1	0	0	0	0
ojRCjpSLms8	VACINAÇÃO: Ministério da Saúde lança campanha contra sarampo e pólio	no		1533130222	Conexão Itajubá	UC7shm8XttleSZAm5SOXXj3A	News & Politics	84				0	0
BvkM5_Pqa_s	Panorama LGBT	no		1561747906	Scio Education	UCyuDCBA1ig-x1YeAQBX2b4g	Education	37	2	2	1	0	0
GqGxOTFiwko	Leis e Epilepsia	no		1349289738	Camila Delmondes Dias	UChFmohIxapcro2kigBCT_AQ	Education	62132	1461	57	0.039014373716632	0	200
Dw3W4GKunjU	Grávida pode tomar a vacina de sarampo?	no		1566057448	Jair Tabchoury Filho	UCrOvuxLgXoH35EwUh9kRceg	People & Blogs	231	15	1	0.066666666666667	0	8
5AorONFVu4Q	Sorologia IgG e IgM	no		1460796571	Enf. Leandro Bauer	UCKWtY_NSa3xTkz0YT28QNSg	People & Blogs	118954	1997	74	0.037055583375063	0	172
jbtikpO2tBY	Vacina tríplice viral contra o Sarampo Caxumba e Rubéola	no		1547288859	BAB Channel	UCR418yAQHUxufBCGUmwLMVg	People & Blogs	24	0	0		0	0
xmIBdl1rpY4	Caxumba: Sintomas Tratamentos e Causas!	no		1546966931	Saúde Dicas - Oficial	UCj0aH1oJz-m3n6TDW-Ly20w	Howto & Style	18367	600	20	0.033333333333333	0	17
xyLMo6L_qPU	Rubéola - Médico	no		1219239587	RTVADAG	UCHksAPatc-89V85O6KgGXTg	News & Politics	8583	24	2	0.083333333333333	0	0
gsv9PZ5getI	Marcelito Pomoy Sings Beauty And The Beast With DUAL VOICES! - America s Got Talent: The Champions	no		1581256794	America s Got Talent	UCT2X19JJaJGUN7mrYuImANQ	Entertainment	5157682	160033	3936	0.024594927296245	0	23568
yT8OyuIX56Q	UFC 247: Jon Jones and Dominick Reyes Octagon Interview	no		1581229540	UFC - Ultimate Fighting Championship	UCvgfXK4nTYKudb0rFR6noLA	Sports	1734700	20483	18971	0.9261826880828	0	19125
Z743oNzfIcY	Even Thinner Than AirPods...	no		1581267612	Unbox Therapy	UCsTcErHg8oDvUnTzoqsYeNw	Science & Technology	993299	33356	3168	0.094975416716633	0	2128
M3Y_B7fNmjA	The Most Underrated Game Ever	no		1581275004	Jaiden Animations	UCGwu0nbY2wSkW8N-cghnLpA	Film & Animation	2209356	218278	2341	0.010724855459552	0	31664
wioKuReF1FM	Dominick Reyes reacts to Jon Jones defeat | UFC 247 Post Fight Press Conference	no		1581237116	TheMacLife	UC789h3eqw0H1HqGmIsI26OA	Sports	1290595	19163	1331	0.069456765642123	0	12382
KSKJKLmAqpI	Lamborghini Race Winner Keeps Lamborghini	no		1581195602	MrBeast	UCX6OQ3DkcsbYNE6H8uQQuVA	Entertainment	13761994	744149	12173	0.01635828308578	0	36989
r22-K87tEPk	Rebuilding A Wrecked 2020 Jeep Gladiator Rubicon Part 8	no		1581258602	goonzquad	UCwO_xoYm2vjhu4kZSxFO5mA	Howto & Style	718689	34753	473	0.013610335798348	0	1837
AmKVJ4XSJvw	Fake Cake Vs Custom Cake 2 - Challenge	no		1581256802	Guava Juice	UCMNmwqCtCSpftrbvR3KkHDA	Entertainment	454792	10370	1086	0.10472516875603	0	9450
ihalG3Rw_QA	ADAM SANDLER wins Best Male Lead for UNCUT GEMS at the 35th Film Independent Spirit Awards	no		1581210295	Film Independent	UCZWlScCmjiezyIRAybUgXYQ	Film & Animation	1050999	22351	234	0.01046933023131	0	1272
SYPMnNGa1Mo	We Tested VIRAL TikTok FOOD HACKS... **SHOCKING**	no		1581189469	FaZe Rug	UCilwZiBBfI9X6yiZRzWty8Q	Entertainment	3237462	130422	4791	0.036734599990799	0	12887
vF_bMn-Aj2w	Song Association Game with my Sis #funnyaf	no		1581209160	Bretman Rock	UC3EFKdXAU99j3ppGgvTz7XQ	People & Blogs	2719828	176807	2485	0.014054873393022	0	8643
DAyKeqm2_uc	Como tornar MARTE habitável? Com Iberê	no		1528124401	Canal Nostalgia	UCH2VZQBLFTOp6I_qgnBJCuQ	Entertainment	3745340	468915	5108	0.010893232248915	0	15928
ASUTHfx1Qw0	CAIXA MISTERIOSA DE BATMAN MISSIONS!!	no		1544708701	Brancoala	UC0otZdGYsA9KqVKAcn2peQA	Entertainment	3964313	48501	4447	0.09168883115812	0
Bl8Q7Lt56y0	A origem do universo | Teoria do BIG BANG	no		1517432401	Canal Nostalgia	UCH2VZQBLFTOp6I_qgnBJCuQ	Entertainment	3873234	562875	7691	0.013663779702421	0	33693
WRJB9J4MgxY	30 COISAS QUE VOCÊ NÃO SABIA EM 5 MINUTOS [21]	no		1581258941	Fatos Insanos	UCF5OxapO7zJUkX9EYvGwN_Q	Entertainment	34396	4501	34	0.0075538769162408	0	88
CMfjd--AqWY	90% DAS PESSOAS ERRARAM A RESPOSTA	no		1545912001	Felipe Neto	UCV306eHqgo0LvBf3Mh36AHg	Entertainment	7620226	462272	9056	0.019590197978679	0	23998
_SxWAyV5BWY	VÍDEO GAMES FAZEM MAL?	no		1533740404	Canal Nostalgia	UCH2VZQBLFTOp6I_qgnBJCuQ	Entertainment	3190814	346802	3255	0.0093857590209976	0	10045
E3cIU6NbMWE	Essa é a Primeira Foto de um Buraco Negro	no		1554927469	Ciência Todo Dia	UCn9Erjy00mpnWeLnRqhsA1g	Science & Technology	883361	130360	963	0.0073872353482663	0	6261
iACNqqO7fz8	TRUQUES INCRÍVEIS COM BALÕES	no		1546545603	Felipe Neto	UCV306eHqgo0LvBf3Mh36AHg	Entertainment	8428886	567278	10436	0.018396623877534	0	13719
i06-Gp6hU3o	ANIMATOONS #1	no		1449838801	Canal Nostalgia	UCH2VZQBLFTOp6I_qgnBJCuQ	Entertainment	4785369	360288	8618	0.02391975308642	0	10566
IWqQeiwMgco	AQUELE VÍDEO DE CIÊNCIA! - PSVVU (Ep. 01)	no		1506472910	Coisa de Nerd	UCuxfOdbKQy0tgGXcm9sjHiw	Entertainment	2355472	313000	1721	0.0054984025559105	0	10986
yJCFpv7T2Ys	O QUE ACABOU COM OS DINOSSAUROS ??	no		1536178158	Você Sabia?	UCj0O6W8yDuLg3iraAXKgCrQ	Entertainment	7145743	671080	6143	0.0091539011742266	0	25781
Q9J4ArjheD8	O Entrelaçamento Quântico Explicado	no		1545334686	Ciência Todo Dia	UCn9Erjy00mpnWeLnRqhsA1g	Science & Technology	469776	58125	404	0.0069505376344086	0	3131
mJcR7Tw8S9U	ZELDA - Nostalgia	no		1371087734	Canal Nostalgia	UCH2VZQBLFTOp6I_qgnBJCuQ	Entertainment	1513067	99114	954	0.0096252799806284	0	11904
5ht8ewR694M	Descobertas recentes da ciência que você não vai acreditar!!	no		1521060396	Universo Curioso	UCgWOsOjYMJyndvwyU9gzBKQ	Entertainment	530964	18899	554	0.029313720302662	0	464
nEVPDqUb5dM	A TERRA É PLANA? Com Leon e Nilce	no		1510174803	Canal Nostalgia	UCH2VZQBLFTOp6I_qgnBJCuQ	Entertainment	7892092	1146172	25983	0.022669372485107	0	77178
Z6Ne-FCNOY8	Guerra Fria ao som de Eduardo e Mônica - Retrospectiva HISTÓRICA	no		1561647499	Canal Nostalgia	UCH2VZQBLFTOp6I_qgnBJCuQ	Entertainment	2514000	411591	4688	0.011389947787974	0	9651
WvQlhMjGo4M	BURACOS NEGROS como eles surgem?	no		1508360401	Canal Nostalgia	UCH2VZQBLFTOp6I_qgnBJCuQ	Entertainment	4939110	733054	4354	0.0059395351502072	0	19858
oa2nr6XhVQ8	E Se o Sol Fosse um Buraco Negro?	no		1544800113	Ciência Todo Dia	UCn9Erjy00mpnWeLnRqhsA1g	Science & Technology	445301	50579	244	0.0048241364993377	0	1494
OmVca2R32wk	Entenda a corrupção no Brasil de um modo SIMPLES	no		1523052004	Canal Nostalgia	UCH2VZQBLFTOp6I_qgnBJCuQ	Entertainment	2875008	559445	4412	0.0078863874018	0	15671
YI0QSpRArWA	Tente Sair do Labirinto em 5 Minutos | VR 360	no		1545345902	INCRÍVEL	UCIQPHl1WKKTt9KkWyo_JNig	People & Blogs	98050	3725	609	0.16348993288591	0	438
JGVxXBK8ji0	AS SELFIES MAIS ENGRAÇADAS DO MUNDO	no		1545393615	Felipe Neto	UCV306eHqgo0LvBf3Mh36AHg	Entertainment	4977094	374942	5468	0.014583588928421	0	8346
Hw68MqQhmTs	15 coisas que você não sabia sobre a COCA-COLA	no		1426084201	Canal Nostalgia	UCH2VZQBLFTOp6I_qgnBJCuQ	Entertainment	3205073	258850	3475	0.013424763376473	0	7188
0I6ZQOPfgJk	O QUE MATOU OS DINOSSAUROS?	no		1506117600	Canal Nostalgia	UCH2VZQBLFTOp6I_qgnBJCuQ	Entertainment	3969065	531241	5343	0.01005758215198	0	18362
uKwrpibtKE8	RECEBI O FELIPE CASTANHARI DO CANAL NOSTALGIA EM CASA! | RICHARD RASMUSSEN	no		1514320726	Richard Rasmussen	UC13ikrGSy3E2AveqLAI9lqg	Entertainment	695629	72628	714	0.0098309192047144	0	2762
1Bhb7esrfVE	O dia que um LADRÃO me fez de IDIOTA	no		1542981512	Canal Nostalgia	UCH2VZQBLFTOp6I_qgnBJCuQ	Entertainment	2684992	335329	23034	0.068690748488798	0	7975
soB_zeZhVc0	Um dia em CHERNOBYL - Canal Nostalgia	no		1533222003	Canal Nostalgia	UCH2VZQBLFTOp6I_qgnBJCuQ	Entertainment	9384062	1092425	11649	0.010663432272238	0	22660
DBGwSvj-zZg	CAVALEIROS DO ZODÍACO - Nostalgia	no		1333486102	Canal Nostalgia	UCH2VZQBLFTOp6I_qgnBJCuQ	Entertainment	1988764	111007	763	0.0068734404136676	0	11597
ESyK5tHrBNs	LOONEY TUNES - Nostalgia	no		1447246800	Canal Nostalgia	UCH2VZQBLFTOp6I_qgnBJCuQ	Entertainment	1696877	139671	1098	0.0078613312713448	0	6637
OGSfxOH410I	QUAL A ORIGEM DA LUA?	no		1499983202	Canal Nostalgia	UCH2VZQBLFTOp6I_qgnBJCuQ	Entertainment	4550780	714391	7775	0.010883395787461	0	33857
l52pbGksFp0	A História de como carreguei a TOCHA OLÍMPICA!	no		1468776630	Canal Nostalgia	UCH2VZQBLFTOp6I_qgnBJCuQ	Entertainment	3618643	501789	6173	0.012301983503026	0	14703
P8OUWIfhGTY	TV GLOBINHO - Nostalgia	no		1412197203	Canal Nostalgia	UCH2VZQBLFTOp6I_qgnBJCuQ	Entertainment	2993342	213284	1650	0.0077361639879222	0	22610
622eqAEoJqo	HARRY POTTER - Nostalgia	no		1429799402	Canal Nostalgia	UCH2VZQBLFTOp6I_qgnBJCuQ	Entertainment	4078815	329043	3133	0.0095215518944333	0	14162
fMHDJuXIXWA	MAMONAS ASSASSINAS - Nostalgia	no		1427293801	Canal Nostalgia	UCH2VZQBLFTOp6I_qgnBJCuQ	Entertainment	3318939	291953	1741	0.0059632886115231	0	11282
VPZgbjmPBGc	O FONE DA OSTENTAÇÃO! - Nerd Hi-Tech 10	no		1545435622	Coisa de Nerd	UCuxfOdbKQy0tgGXcm9sjHiw	Science & Technology	1366585	132057	1123	0.0085039036173773	0	3393
ctDMkhL7Xes	Como eu aprendi a ser FELIZ	no		1500674404	Canal Nostalgia	UCH2VZQBLFTOp6I_qgnBJCuQ	Entertainment	1775704	346940	2987	0.0086095578486194	0	12982
8SSZpwMXxCA	A BÍBLIA DIZ QUE A TERRA É PLANA? (SOBRE O NOSTALGIA CIÊNCIA DO CASTANHARI)	no		1510248147	Dois Dedos de Teologia	UCzGwyAyWLB2Si6VDFpq8rjw	Education	236764	20633	2917	0.14137546648573	0	6732
ZM-RcouF_lA	NÃO ESPERAVA ISSO NO SETUP DO CASTANHARI	no		1499815926	Rocketz Labz	UCJWCecuSUa9CsNQ4MGJ_g3A	Science & Technology	778597	59859	601	0.010040261280676	0	1560
90N6xRU58Vo	Entenda o sistema político no Brasil de um jeito SIMPLES	no		1495666800	Canal Nostalgia	UCH2VZQBLFTOp6I_qgnBJCuQ	Entertainment	3991050	592947	4275	0.0072097506185207	0	21577
qvZlJOttD4A	COMO FICOU A MINHA CASA? Antes e Depois	no		1506637800	Felipe Castanhari	UCweLVJlESUt6fCdDFeDXgcA	People & Blogs	2637606	243112	3486	0.014339070058245	0	7539
4EgMUZ6BGuM	Nova Tecnologia que ultrapassa todas as barreiras da Física!!!	no		1511970936	Legião Sobrenatural TM	UCjWw8sBL0PPZLPxusmNLvAQ	Science & Technology	583714	20549	1275	0.062046814930167	0	1030
mnfm5_Fizvk	O ENIGMA NEGRO 4 (Enigma Brasileiro)	no		1545573496	Cellbit	UCnU2EtUW8Z4DxSqXxJ5cMQg	Entertainment	1709310	279701	967	0.0034572632918724	0	6890
HPVv_oIPW9c	MICHAEL JACKSON - Nostalgia	no		1444251600	Canal Nostalgia	UCH2VZQBLFTOp6I_qgnBJCuQ	Entertainment	7180876	512325	3768	0.0073547064851413	0	36842
meLRzQr8e6s	Teorias da Conspiração | Nerdologia	no		1456408801	Nerdologia	UClu474HMt895mVxZdlIHXEA	Science & Technology	793055	87495	1119	0.012789302245843	0	3973
ZIwMf6mp9YU	FELIPE NETO VAI DESTRUIR SUA FAMÍLIA	no		1542139280	Felipe Neto	UCV306eHqgo0LvBf3Mh36AHg	Entertainment	2315294	301271	14955	0.049639693166617	0	19761
ugl6UZbGNlw	ANUNNAKI A RAÇA QUE CRIOU OS SERES HUMANOS !!	no		1545334759	Você Sabia?	UCj0O6W8yDuLg3iraAXKgCrQ	Entertainment	4596648	486776	12707	0.026104409420349	0	38060
vSpsk4F3muU	De onde vêm as células (eucariotos) | Nerdologia Ensina 04	no		1563204718	Nerdologia	UClu474HMt895mVxZdlIHXEA	Science & Technology	154716	22324	79	0.0035387923311235	0	580
yOZww0iPQ5w	Quantas Bactérias Moram No Seu Corpo? || 360 VR	no		1537707614	INCRÍVEL	UCIQPHl1WKKTt9KkWyo_JNig	People & Blogs	100079	4621	111	0.024020774724086	0	325
CPLkx-PxXH8	Como Personagens e Pessoas Famosas Veem o Mundo | 360 VR	no		1534858306	INCRÍVEL	UCIQPHl1WKKTt9KkWyo_JNig	People & Blogs	790491	28154	1351	0.047986076578817	0	1052
AXl-idoM0BA	EU PROVEI QUE A TERRA É PLANA!	no		1523194046	Felipe Neto	UCV306eHqgo0LvBf3Mh36AHg	Entertainment	4779188	480813	27820	0.057860332395339	0
yzHhc6Wnibg	VEM COISA NOVA POR AÍ! CAC- 5 ANOS! - Ep.1304	no		1545435422	Cadê a chave?	UCtrjFP7i92_30uv6IehwE5Q	Entertainment	297167	60863	290	0.0047647996319603	0	2533
wf4Hkri35DY	Será que devemos entrar em contato com povos isolados? | Minuto da Terra	no		1470144601	Minuto da Terra	UCB0zinWfy-dS_NqcOINYo3A	Science & Technology	180351	10250	109	0.010634146341463	0	270
874tzml-dSw	Viaje pelo Universo Sem Sair do Sofá | 360 VR	no		1532444401	INCRÍVEL	UCIQPHl1WKKTt9KkWyo_JNig	People & Blogs	444901	12435	762	0.061278648974668	0	671
IWHdLLmNHcE	MANSÃO WINCHESTER A CASA MAIS MAL ASSOMBRADA DO MUNDO !!	no		1544731887	Você Sabia?	UCj0O6W8yDuLg3iraAXKgCrQ	Entertainment	6947357	733318	6489	0.0088488213844471	0	22416
aUtyGkG9DSc	TIPOS DE BEBÊS RECEM-NASCIDOS TOMANDO VACINA COM BEBÊ REBORN- GABI REBORN	no		1573253233	gabi reborn	UCk5P5ft8WxlmBrvwmqmYLwQ	Entertainment	167140	8989	343	0.038157748359106	0	291
Kclft0XTCrI	NATAL - 13 COISAS QUE VOCÊ NÃO SABIA !!	no		1545763124	Você Sabia?	UCj0O6W8yDuLg3iraAXKgCrQ	Entertainment	5318360	698190	7441	0.010657557398416	0	14420
yTiY-5-4LjY	Como Serão os Humanos e a Terra em 1.000 Anos?	no		1513125047	INCRÍVEL	UCIQPHl1WKKTt9KkWyo_JNig	People & Blogs	539039	25980	1304	0.050192455735181	0	1875
mtdckZK0Oy8	MELHOR E PIOR DA DC EM 2018	no		1545346252	omeleteve	UCaSAM5kna2KyX-uVLSGr8PQ	Entertainment	282112	23406	939	0.04011791848244	0	1341
O1KPNcvOHQ4	A Europa RESPONDEU a gente sobre o ARTIGO 13 (inacreditável)	no		1543665606	Felipe Neto	UCV306eHqgo0LvBf3Mh36AHg	Entertainment	3755813	559075	12345	0.022081116129321	0	29922
DB8yS16aVAs	defendendo a terra plana	no		1521727206	Cellbit	UCnU2EtUW8Z4DxSqXxJ5cMQg	Comedy	2627993	408248	11378	0.027870314122788	0	26265
dPY3L1vupzQ	Minecraft - Especial de Natal	no		1545659821	Jovem Nerd	UCmEClzCBDx-vrt0GuSKBd9g	Entertainment	403381	41001	1061	0.02587741762396	0	1296
Xp2wbirNY_M	Viaje Pelo Mundo Sem Sair De Casa | 360 VR	no		1531349999	INCRÍVEL	UCIQPHl1WKKTt9KkWyo_JNig	People & Blogs	393081	16598	473	0.028497409326425	0	950
PW6IteH23cw	KRAKATOA (#Pirula 283)	no		1545757783	Canal do Pirulla	UCdGpd0gNn38UKwoncZd9rmA	Science & Technology	157822	18263	203	0.011115369873515	0	875
AmrNqVJuwgY	VACINA PARA GRIPE - Tomar ou não? | Medicina Ortomolecular	no		1543341601	Dr J Bussade	UCOX1xjMcnZVmV-yx0VC6Fvg	People & Blogs	34474	1759	35	0.019897669130188	0	120
fh2Psmv2QYU	QUEM SABE MAIS DE GAME OF THRONES?	no		1545400804	CAROL MOREIRA	UC2oZNzo6o37qejkFQE2dIAA	Entertainment	136896	18359	112	0.0061005501388965	0	585
QykmFQn57Wc	TRETOSPECTIVA 2018	no		1546032182	Zelune	UCTe18hXXnFNL7FDdnVfIqEQ	Entertainment	116134	24080	717	0.029775747508306	0	1656
m8BvYiDeuYY	TOMANDO VACINA COM MEU NAMORADO! *Zabetta Macarini*	no		1562962501	Zabetta Macarini	UCbxeWUKWro8bMscsa36-BtA	Entertainment	359379	21854	360	0.016472956895763	0	639
hUpUO78JmlE	RETROSPECTIVA ANIMADA 2018 - Canal Nostalgia	no		1546178406	Canal Nostalgia	UCH2VZQBLFTOp6I_qgnBJCuQ	Entertainment	9165519	979003	105965	0.10823766627886	0	62450
SGpSyR9eX0Q	ANALISANDO O YOUTUBE REWIND 2018! Por que não tô nele?	no		1544875202	Felipe Neto	UCV306eHqgo0LvBf3Mh36AHg	Entertainment	3272258	364220	32145	0.088257097358739	0	15763
qR7oAkKaAKE	QUEBRANDO TRADIÇÃO NATALINA - Ep.1305	no		1545615175	Cadê a chave?	UCtrjFP7i92_30uv6IehwE5Q	Entertainment	537940	81417	660	0.0081064151221489	0	2371
ZnGDTOPWgXs	[ESPECIAL DE NATAL] AMIGO DA ONÇA COM NOSSA EQUIPE ft DAVY JONES	no		1545769652	Mari e Tha	UCpwFulVhWRsS92nYOTdh-uw	Entertainment	122940	16363	78	0.0047668520442462	0
ncoThYOP6K4	TALK SHOW SHOW - MATHEUS CANELLA	no		1532624693	Magalzão Show	UCgheXPYps0uCdB60AvUQYbg	Comedy	421194	34993	692	0.019775383648158	0	941
98BaO5JYHSg	Felipe Castanhari fala sobre saída do Youtube no Maiara Responde	no		1511164800	Rádio BandNews FM	UCWijW6tW0iI5ghsAbWDFtTg	News & Politics	378117	16721	2526	0.15106751988517	0	501
6jL2Fi-fU1Y	“Tivemos que partir” I 360º	no		1543949060	MSFBrasil	UCyG6SY3s8fS7ZKje6lv1JKg	Nonprofits & Activism	15745	86	3	0.034883720930233	0	2
v1n6vP-XgiQ	A Mata é a Nossa Casa	no		1480937532	Fundação SOS Mata Atlântica	UCwumfjrPgLl0H2wS7juY5Xw	Nonprofits & Activism	1256091	2318	43	0.018550474547023	0	564
kXpdKQ0rF_U	Rolê no Beco Diagonal - O Mundo Mágico de Harry Potter | NerdVlog 360 - Ep.9	no		1464883977	Jovem Nerd	UCmEClzCBDx-vrt0GuSKBd9g	Entertainment	121053	8321	257	0.030885710852061	0	430
NqwO-NmWoZk	CAPSVLOG - Um conceito de Tempo	no		1581285602	Canal CAPSLOCK	UCKXlbJbeAb8uTdRHJhlwE1g	Entertainment	2584	718	3	0.0041782729805014	0	67
LE998KzhuU8	Eu dormi com uma mulher... // Comentando Comentários	no		1545345065	LubaTV	UCYALxwppPJjYyTMEwwEcNCQ	People & Blogs	462333	74305	594	0.0079940784603997	0	3227
AwTDcholkk4	Daily Drive em 360 graus!	no		1501732689	izzynobre	UCT4jm6o-mUMuo1bKHcHSIfA	People & Blogs	11204	983	37	0.03763987792472	0	204
jupz0bdixTk	Autismo do Eric ANTES E DEPOIS - Evolução Pós Terapias e Dicas para o Dia-a-Dia	no		1557522004	Mamãe Tagarela	UCz1xVDltULzUhZCJ1TkvnTQ	People & Blogs	70245	5341	40	0.0074892342258004	0	212
aVUDDYvbnC0	Coronavírus- Ministro da saúde realiza vistoria na base aérea de Anápolis	no		1581109356	PUC TV GOIÁS	UCBx_CluVFNvy0TXsmNBZ-ow	News & Politics	133	8	0	0	0	0
5enJZNxVXH8	Campus Pampulha terá postos de vacinação da Tríplice Viral que previne Sarampo Rubéola e Caxumba	no		1567538893	TV UFMG	UCvNbTU5NSQ_K8cWfY9OmWsw	Education	862	24	1	0.041666666666667	0	1
G_Ye9kp4wsM	Colação de grau da turma de direito	no		1581019427	PUC TV GOIÁS	UCBx_CluVFNvy0TXsmNBZ-ow	News & Politics	173	8	1	0.125	0	0
F6wCJxcVchQ	Como Fazer Capa de Caderneta de Vacinação de E.V.A com Fecho 📔💉💕	no		1565960413	Diy com Fabiana Nogueira	UC_vFhB8UkkdeiOOOZTeXG7A	Entertainment	121407				0	224
_RGZSo6lNjg	Administração de Medicação Intramuscular | Sua Saúde na Rede	no		1455717012	Sua Saúde na Rede	UC_er6_R1PKUCxc7QSXxIvzw	Nonprofits & Activism	2403540	12874	2064	0.16032313189374	0
_Eu8xqZHD8U	Infectologista fala sobre surto de febre amarela no Brasil	no		1484622367	Record News	UCuiLR4p6wQ3xLEm15pEn1Xw	People & Blogs	25899	293	22	0.075085324232082	0	27
K4Px6ng5bMo	Apenas um em cada quatro adultos tomou todas as vacinas afirma pesquisa	no		1531990144	Jornal da Record	UCmpHPgeCBgvk_fDXZQKsnAA	News & Politics	7317	88	4	0.045454545454545	0	6
t6o4QqvP5TM	Imunização para Concursos de Enfermagem - Prof. Dayse Amarílio	no		1440529661	EnfConcursos - Enfermagem para Concursos	UChHd-MU2mOvZHmBQz6zJw_w	Education	293096	4548	250	0.054969217238347	0	79
uiTIAlJe4JE	Mulheres - Saúde: Meningite B (19/08/15)	no		1440086612	Mulheres	UCDtVoSwSwQgwhcC89Nlz5Vg	Entertainment	2489	32	2	0.0625	0	1
J3AjMwGTbso	Jornada da Cidadania faz parceria com a Prefeitura de Aparecida de Goiânia	no		1581109997	PUC TV GOIÁS	UCBx_CluVFNvy0TXsmNBZ-ow	News & Politics	24	0	0		0	0
pP4ue0l5czI	Escola de Enfermagem promove campanha de vacinação contra Sarampo Caxumba e Rubéola	no		1567084167	TV UFMG	UCvNbTU5NSQ_K8cWfY9OmWsw	Education	859	23	2	0.08695652173913	0	0
2jkNmrXbJ9k	Calendário de vacina dos cães	no		1470347479	Rosa e Blue	UCskf1Ks-24BGZctXlN6QYwA	Film & Animation	113402	3909	63	0.016116653875672	0
ra_ebPTgzzw	Vacinas e Soros	no		1376920211	SAS Educacao	UCNjPniJ9bZuCDQXCRqNsCBQ	Education	150418	3247	41	0.012627040344934	0	127
rB0dNifaOVQ	Administração de Medicação via Subcutânea | Sua Saúde na Rede	no		1415023142	Sua Saúde na Rede	UC_er6_R1PKUCxc7QSXxIvzw	Nonprofits & Activism	597441	4496	521	0.11588078291815	0
ISFVa1RZDWk	Ligado em Saúde - Rotavírus	no		1411666468	Canal Saúde Oficial	UC0Q3GfF9amdyyjTA9DpTnyw	Education	13905	210	16	0.076190476190476	0	5
7OaPU0kt7dE	A melhor forma para o preparo de Injetáveis - FRASCO AMPOLA	no		1504729983	Aplicar Conteúdos em Saúde	UCkke64Kird1ZcZsPJEo_hYg	Education	116037	2173	98	0.045098941555453	0	31
x6U_tFVn4PY	Ministério da Saúde recomenda vacinação para quem vai visitar alguns estados e outros países	no		1452716021	Ministério da Saúde	UC12zKGLhMhDeDidoctM6BrA	Nonprofits & Activism	468	6	0	0	0	0
Wmyd3nq1iig	VACINA TETRA VIRAL | Calendário de vacinação infantil | Parte 11	no		1534253313	Enfermundo	UC8IbAhPglJ1OeC44A_Gtmqg	Education	8408	278	5	0.017985611510791	0	3
0e0AJCbwGjo	Programa CNH Social divulga lista de candidatos selecionados	no		1581108490	PUC TV GOIÁS	UCBx_CluVFNvy0TXsmNBZ-ow	News & Politics	23	0	0		0	0
A5Q-N3dP7nQ	Vacinação contra gripe | Mitos e verdades	no		1399062646	Ministério da Saúde	UC12zKGLhMhDeDidoctM6BrA	Nonprofits & Activism	64640	775	78	0.10064516129032	0	0
N2agKSEsQt4	Vacina para gestantes reduz transmissão da coqueluche entre recém-nascidos	no		1416252093	TV BrasilGov	UCjaWLFTNqLkq3ZY2BJ4NYRg	News & Politics	1521	14	0	0	0	1
FDEx5ywLvH8	Sarampo - Tríplice Viral por FVS	no		1525462124	telessaudeamazonas	UCrh3PVCJvakmb7t6_XhPLcQ	Education	1242	29	0	0	0	2
cp11b-yO51g	01/08/2018 - Imunização: Vacina tríplice Viral e Tetra Viral/Poliomielite	no		1533321716	Tele Educa Mato Grosso	UC9gmqJKNBOyCl2KLdJIv0mQ	Education	1057	17	0	0	0	2
xTmer6vmADw	Saiba como participar de campanha de doação de sangue em Goiânia	no		1581018874	PUC TV GOIÁS	UCBx_CluVFNvy0TXsmNBZ-ow	News & Politics	26	0	0		0	0
2k_xZMqMD2U	Vacinação tetra-viral	no		1381147846	TV SIM Linhares	UCXLe20604d4XVV_Z6cQc-gg	News & Politics	537	6	0	0	0	0
oMwUjnNL3rI	Vacinação contra sarampo	no		1531155610	TV ALFENAS	UCDo7hEeMTMHLJxRu5fnbXKg	News & Politics	3412	21	4	0.19047619047619	0	3
qEKA-PnkBYs	Você e o Doutor: saiba tudo sobre febre amarela	no		1516123463	Hoje em Dia	UCN-opsqqDunWO6h5uCp9Y4g	Entertainment	8431	131	5	0.038167938931298	0	8
UooU-skPwtc	Veterinária explica sobre as vacinas em cães filhotes	no		1504662472	My Pets Nanny	UCm-XT_NupkfP-19ZE8QJACA	Pets & Animals	146659	3541	169	0.047726630895227	0	289
2XsmPu00lMU	Você e o Doutor: conheça os sintomas e saiba prevenir a hepatite A	no		1508860522	Hoje em Dia	UCN-opsqqDunWO6h5uCp9Y4g	Entertainment	38643	746	33	0.044235924932976	0	24
N4-TFZ9ESmw	SP aplica mais de 260 mil doses de vacina contra sarampo e pólio	no		1533935655	tvbrasil	UCSv9d0kQegylHWpP83jWSQg	Entertainment	86	2	0	0	0	0
hshcfVKHL40	Transmissão ao vivo do SBT - RIO (HD 24 HORAS)	no		1581116488	SBT Rio	UCsRfBAspa72ExrsN347W2xg	Entertainment	367535	5352	306	0.057174887892377	0	0
tVvPfJpb2OY	VIRUS MUSICAL 4	no		1564333204	O Que Não Dizer Oficial	UC19aAr6UojQesIVCBsXJGIw	Entertainment	2648030	529908	2105	0.0039723876597447	0	6331
Vyv2CGkIGV8	Conheça os tipos de Hepatites e saiba como preveni-las	no		1364930886	Hospital Samaritano	UCPU9R4M0Fruz-E2Vo9KEmAQ	Science & Technology	5917	60	0	0	0	2
7mzumR-y5lk	Quem deve se vacinar contra o sarampo? Quais sinais e sintomas? | GNDI	no		1533933016	Grupo NotreDame Intermédica	UCsQbqbLY-uvbXSCXinr5imA	Education	1510	26	1	0.038461538461538	0	8
vnbHMkDigYU	TODAS AS VACINAS PARA PINTINHOS - Tabela Completa no Vídeo	no		1563548137	Mundo Caipira - Rodrigo Matos	UCLWEHMfQsBVlIEQicwXtb1w	People & Blogs	16612	1294	12	0.009273570324575	0	96
NGKp1UQ8kEo	Dia D de vacinação contra o sarampo	no		1563803872	TV BrasilGov	UCjaWLFTNqLkq3ZY2BJ4NYRg	News & Politics	475				0	2
b_mMBuUdYP4	Ministério distribui mais de 16 milhões de vacinas tríplice viral	no		1565891463	tvbrasil	UCSv9d0kQegylHWpP83jWSQg	Entertainment	666	7	3	0.42857142857143	0	1
OWMTNuCPEpk	Vacina Hepatite B (Atualizada) - Aula Completa (Profa. Juliana Mello)	no		1553349000	ENFrente Enfermagem Continuada	UCD9kk0EUEtflrRl6TV0lDyA	Education	5140	325	4	0.012307692307692	0	23
ckZKwTFctS0	Vacina. Como preparar	no		1465186664	Canil Rott Haus	UCvi6qsQ6iqHWDph-ckhX5GQ	People & Blogs	132206	2593	106	0.040879290397223	0	146
EEo7SNKywdg	Administração Subcutânea	no		1541617898	Ped BiociênciasII	UC_rnNJR_cCfi_p-UMjtf85Q	People & Blogs	44445	497	30	0.060362173038229	0	20
y0JW9YySvW0	VACINAÇÃO EM GATOS. Quais são as vacinas para gatos e quando fazer? - Gatil Hauser	no		1486985401	Gatil Hauser - Gatos persas e exóticos	UCr9Jv4BCx_EZ3-RiuYwQXqg	Pets & Animals	34816	2128	37	0.017387218045113	0	411
2McYoG4oFTo	VACINA TRIVIRAL	no		1315040455	Délio Pinheiro	UCcu3pbQumWatGNPvV_2RyPw	Entertainment	329	0	0		0	0
MgH15RBwi04	Saiba a importância da vacina tríplice viral- Balanço Geral Manhã	no		1568819953	Televisão Atalaia	UC0Uzow4iFA8PoIKE_U2rmeg	News & Politics	102	4	0	0	0	1
Lfq7TzPM0SI	Esses 12 Sintomas de Câncer Muitas Pessoas Desconhecem - Veja!	no		1483650030	Natureba - Curas Naturais	UCN9eb1Z__4hietbXmwxOglw	Howto & Style	2097884	40947	1928	0.047085256551151	0	331
dN5y8NNeM1g	Neurocientistas alertam que uma a cada sessenta e oito crianças tem autismo no Brasil	no		1520826484	Domingo Espetacular	UCP-Vg2PcmLiWpEdvMI1R35w	Entertainment	152151	3485	109	0.031276901004304	0	282
Fl09t_l2F_g	ENTENDENDO O AUTISMO PARA PODER CURÁ-LO	no		1522711209	Dr. Uronal Zancan	UCVqS-HRwe2vq_Jjgu4fg-UA	Education	12165	1084	26	0.023985239852399	0	88
-7yJ7R4gC5M	Autismo explode no mundo. Vitamina D e B9 na gestação. Entrevista Dr. Cícero Coimbra.	no		1521926854	João Carlos Baldan Acupuntura e Saúde Quântica	UCgDb_6JF3elI2CFR9SqSbwA	Science & Technology	22917	1000	18	0.018	0	87
jJM1fAsW3wQ	OS 15 COMPORTAMENTOS COMUNS QUE MAIS FAZEM PERDER SAÚDE	no		1515018438	Dr. Uronal Zancan	UCVqS-HRwe2vq_Jjgu4fg-UA	Education	30416	3289	42	0.012769838856795	0	179
sewuoSutSWY	LACTOBACILOS PROMOVEM O REJUVENESCIMENTO	no		1520291514	Dr. Uronal Zancan	UCVqS-HRwe2vq_Jjgu4fg-UA	Education	32448	2701	32	0.011847463902258	0	190
ggLOnhMSQzg	Por que a prevalência de autismo está aumentando tanto!?	no		1477342125	Mayra Gaiato	UC42k7FI53tnSSIjgzW-rbLA	Education	9064	888	7	0.0078828828828829	0	33
97bfmEDGIck	Conheça a poderosa enzima da saúde produzida pela musculação: a MIOCINA	no		1503966396	Dr. Uronal Zancan	UCVqS-HRwe2vq_Jjgu4fg-UA	Education	127764	11858	147	0.012396694214876	0	668
s9md_TN8UpM	COMO VOCÊ PODE SER IDOSO SEM FICAR VELHO	no		1576024555	Dr. Uronal Zancan	UCVqS-HRwe2vq_Jjgu4fg-UA	Film & Animation	7184	1062	13	0.012241054613936	0	68
t7i5LzSuCCY	COMO FUNCIONA O CÉREBRO DA PESSOA COM AUTISMO?	no		1407164003	Autismo.Apoio. e.Desabafos	UC5eWe0ULMB-T72sAL5ybArg	People & Blogs	384943	7801	112	0.014357133700808	0	190
VAgv8ARScJo	10 ALIMENTOS PARA SEU FILHO MORRER MAIS CEDO	no		1551397342	Dr. Uronal Zancan	UCVqS-HRwe2vq_Jjgu4fg-UA	Film & Animation	9918	1353	16	0.011825572801183	0	113
XfjFOfaaIbE	INTERSTÍCIO É O NOVO ÓRGÃO DESCOBERTO NO NOSSO CORPO	no		1522797672	Dr. Uronal Zancan	UCVqS-HRwe2vq_Jjgu4fg-UA	Education	11867	1386	15	0.010822510822511	0	40
w43jPm8kyBc	A frutose é a maior inimiga para o fígado	no		1508883877	Dr. Uronal Zancan	UCVqS-HRwe2vq_Jjgu4fg-UA	Education	390377	17173	633	0.036860187503639	0	1114
p7zFpHiWFPA	META-ANÁLISE DEMONSTRA QUE CORRIDA DIMINUI A MORTALIDADE POR TODAS AS CAUSAS	no		1579908522	Dr. Uronal Zancan	UCVqS-HRwe2vq_Jjgu4fg-UA	Film & Animation	9997	1264	10	0.0079113924050633	0	82
zbjfmfWXPyo	Autismo	no		1462370086	Minutos Psíquicos	UCFiEI1kDHlO9UQtxx0wj-XA	Education	205244	15696	96	0.0061162079510703	0	538
rLHv9GuYxdg	O cérebro e o intestino no autismo	no		1528967456	Dra. Andreia Torres	UC81fUuO3oGR-ju7tEAuyNPA	Education	3567	154	3	0.019480519480519	0	2
i-Cg3RM737c	SENTIR FOME É UM SINAL DE QUE ESTÁ SE ALIMENTANDO DE FORMA ERRADA.	no		1518560226	Dr. Uronal Zancan	UCVqS-HRwe2vq_Jjgu4fg-UA	Education	40244	3543	48	0.01354784081287	0	199
_LS6UumYLuQ	O QUE SÃO CARBOIDRATOS ÓTIMOS E O QUE SÃO CARBOIDRATOS VENENOS	no		1513377046	Dr. Uronal Zancan	UCVqS-HRwe2vq_Jjgu4fg-UA	Education	553786	29993	853	0.028439969326176	0	1651
8jBE9Jxgr5A	Mente Atenta (Mindfulness) É o Principal Recurso de Saúde e É Superior À Meditação	no		1511649216	Dr. Uronal Zancan	UCVqS-HRwe2vq_Jjgu4fg-UA	Education	33527	2862	36	0.012578616352201	0	116
PCNES9hnH10	Dr. Uronal Zancan fala sobre carboidratos para o Doce Limão	no		1511527987	Doce Limão	UCfIlLA5vyrS8PgzSOKE2GBw	Howto & Style	44591	3112	33	0.01060411311054	0
7_0ZbB38lEI	COMER FIBRAS DEIXA AS PESSOAS MAIS JOVENS	no		1526081950	Dr. Uronal Zancan	UCVqS-HRwe2vq_Jjgu4fg-UA	People & Blogs	12407	1543	12	0.0077770576798445	0	87
4IFFhILFsoo	OS 20 PIORES ALIMENTOS QUE VOCÊ NÃO DEVE COMER	no		1513118235	Dr. Uronal Zancan	UCVqS-HRwe2vq_Jjgu4fg-UA	Education	299443	14791	465	0.031438036643905	0	1008
yX0r5PutsWM	As evidências científicas do rejuvenescimento biológico	no		1450892659	Dr. Uronal Zancan	UCVqS-HRwe2vq_Jjgu4fg-UA	People & Blogs	32542	1828	31	0.016958424507659	0	51
lZGBCXLfuj8	A Meditação É um dos Dos Mais Importantes Recursos de Saúde	no		1511562591	Dr. Uronal Zancan	UCVqS-HRwe2vq_Jjgu4fg-UA	Education	27951	2314	28	0.012100259291271	0	96
FQ3tlqCd-1E	Viva Mais e Melhor Eliminando a Química da Sua Vida	no		1508451566	Dr. Uronal Zancan	UCVqS-HRwe2vq_Jjgu4fg-UA	Education	9599	962	8	0.0083160083160083	0	69
uaphvcXkTRo	Dr. Barakat : Água com limão/ Arroz e feijão	no		1552332772	doutorbarakat_snapchat	UC33LTYvNoNvpx7D5qezhxew	People & Blogs	79219	5884	85	0.014445955132563	0	253
N_9BXMgaK-k	ALZHEIMER VOCÊ PODE TER E NÃO SABER MAS PODE REVERTER E PREVENIR!	no		1522970056	Dr. Uronal Zancan	UCVqS-HRwe2vq_Jjgu4fg-UA	Education	15841	1757	33	0.018782014797951	0	112
06CV7xd41KA	A Saúde Intestinal É Obrigatória para a Conquista da Saúde Integral	no		1510957525	Dr. Uronal Zancan	UCVqS-HRwe2vq_Jjgu4fg-UA	Education	121611	9074	104	0.011461318051576	0	468
ZJpRdaVLYg8	O QUE COMER PARA NÃO FICAR DOENTE?	no		1540423574	Dr. Uronal Zancan	UCVqS-HRwe2vq_Jjgu4fg-UA	Film & Animation	32508	3818	49	0.012833944473546	0	173
u3VSi1nwV40	DICAS SOBRE ATRASO NA FALA	no		1500586796	Mayra Gaiato	UC42k7FI53tnSSIjgzW-rbLA	Education	51402	3894	37	0.0095017976373909	0	94
AXOdHF3MBNM	NÍVEIS DE GRAVIDADE E OS PRINCIPAIS SINTOMAS DO AUTISMO - MAYRA RESPONDE	no		1463530188	Mayra Gaiato	UC42k7FI53tnSSIjgzW-rbLA	Education	221526	13015	178	0.013676527084134	0	543
b3VDB8vgUzc	PROBIÓTICOS SÃO MICRORGANISMOS FUNDAMENTAIS À VIDA.	no		1520119157	Dr. Uronal Zancan	UCVqS-HRwe2vq_Jjgu4fg-UA	Education	26627	2437	29	0.011899876897825	0	164
l54SFiFtAoA	Cícero Galli: vitamina D para doenças autoimunes	no		1444243761	NAMU	UCPCwZ6sP0cAwgMsGZ23rOYA	News & Politics	69455	2443	46	0.018829308227589	0	292
E_qh2-EaayI	AS CETONAS PROVOCAM MELHORIA DA SAÚDE COMPROVA MAIS UM ESTUDO CIENTÍFICO	no		1533597940	Dr. Uronal Zancan	UCVqS-HRwe2vq_Jjgu4fg-UA	People & Blogs	11873	1528	11	0.0071989528795812	0	99
B6NCz0njk64	VOCE DEVE USAR SUPLEMENTOS?	no		1519082140	Dr. Uronal Zancan	UCVqS-HRwe2vq_Jjgu4fg-UA	Education	25970	2561	24	0.0093713393205779	0	165
91syo1tYzTA	ESTIMULE O SEU IDOSO A CAMINHAR MAIS DEPRESSA PARA VIVER MAIS E MELHOR	no		1521501653	Dr. Uronal Zancan	UCVqS-HRwe2vq_Jjgu4fg-UA	Education	10759	1130	9	0.0079646017699115	0	67
9JKdOAm0zGc	AULA 4 NO AR - Tudo sobre o Pro Ser!	no		1579003201	Dr. Uronal Zancan	UCVqS-HRwe2vq_Jjgu4fg-UA	Education	2828	285	7	0.024561403508772	0	6
k85yIbg7P7M	ADAPTAÇÃO À ALIMENTAÇÃO LOW CARB É MUITO FÁCIL APESAR DE PARECER DIFÍCIL	no		1518646585	Dr. Uronal Zancan	UCVqS-HRwe2vq_Jjgu4fg-UA	Education	65661	5487	68	0.01239292874066	0	443
0IM1_1LOc-Q	MENSAGEM DE ANO NOVO	no		1577738415	Dr. Uronal Zancan	UCVqS-HRwe2vq_Jjgu4fg-UA	Education	4849	718	4	0.0055710306406685	0	61
sByJI8ECUXc	🔴 CARBOIDRATO MATA MAIS QUE GORDURA!!!	no		1534807206	Dr. Uronal Zancan	UCVqS-HRwe2vq_Jjgu4fg-UA	People & Blogs	12794	1613	16	0.0099194048357099	0	120
AXe2DcPLxJc	SEJA SEU PRÓPRIO MÉDICO E SEU PRÓPRIO ORTOPEDISTA	no		1537313381	Dr. Uronal Zancan	UCVqS-HRwe2vq_Jjgu4fg-UA	Film & Animation	11517	1538	19	0.012353706111834	0	103
rSOduBSz7lI	Como Reconhecer e Identificar Os Primeiros Sinais De Autismo	no		1522708239	Fala Fono por Juliana Trentini	UCgfgPyU5Vc4s1tyBSM6CCvw	People & Blogs	13857	878	19	0.021640091116173	0	156
FWNmgUW8qwA	O VERDADEIRO E ÚNICO DETOX	no		1517265159	Dr. Uronal Zancan	UCVqS-HRwe2vq_Jjgu4fg-UA	Education	400085	25343	634	0.025016769916742	0	1116
bk710nlTXXc	Quais as principais características de uma criança autista?	no		1295520429	universobebe	UCujBU_iFv79ae1QxiBbQkPg	People & Blogs	51818	230	12	0.052173913043478	0	6
87r5NBpXduw	STEPHEN HAWKING PROVOU QUE NÃO SE DEVE ACREDITAR NOS PROGNÓSTICOS MÉDICOS	no		1521069354	Dr. Uronal Zancan	UCVqS-HRwe2vq_Jjgu4fg-UA	Education	21908	2201	38	0.017264879600182	0	160
lHNgQ-4qjac	AS SETE DIMENSÕES DA SAÚDE	no		1514500146	Dr. Uronal Zancan	UCVqS-HRwe2vq_Jjgu4fg-UA	Education	8647	1017	19	0.018682399213373	0	90
fnDG7UlFVAo	Tira Dúvidas - Como a Indústria Está Te Intoxicando e Mantendo Acima do Peso | Dr Juliano Pimentel	no		1536711774	Dr Juliano Pimentel	UCPGGSQfN8LREy6dWdk85fpw	Education	30692	2718	20	0.0073583517292127	0	350
HgQiJQedEHI	Você Sabia que a Falta de Sal Mata Mais que o Excesso?	no		1471452389	Dr. Uronal Zancan	UCVqS-HRwe2vq_Jjgu4fg-UA	People & Blogs	36442	2196	55	0.025045537340619	0	123
Vxh4Q7BX9yA	Teoria da MENTE e Autismo - Fizemos o teste Sally e Anne (Teste para autismo)	no		1544475603	Mamãe Tagarela	UCz1xVDltULzUhZCJ1TkvnTQ	People & Blogs	79779	4140	98	0.023671497584541	0	204
qKB3UIlFi08	Inscreva-se na Semana da Longevidade	no		1576523635	Dr. Uronal Zancan	UCVqS-HRwe2vq_Jjgu4fg-UA	Education	209180	315	1	0.0031746031746032	0	10
PGMrSspbgZQ	A IMPORTÂNCIA DE TER NÍVEIS ÓTIMOS DE VITAMINA D	no		1519168691	Dr. Uronal Zancan	UCVqS-HRwe2vq_Jjgu4fg-UA	Education	23912	2308	20	0.0086655112651646	0	134
GMz38OB_Fcg	Sinais de Autismo em Bebês e Crianças pequenas - 1 I Maria Claudia Brito	no		1492115850	Dra Maria Claudia Brito	UCFbx6QBTcDI6toOnO-EyajQ	People & Blogs	296166	4434	324	0.073071718538566	0	174
f_N8QJdeFKU	OS AMERICANOS ESTÃO FAZENDO MAIS EXERCÍCIOS E ESTÃO FICANDO MAIS DOENTES	no		1521155759	Dr. Uronal Zancan	UCVqS-HRwe2vq_Jjgu4fg-UA	Education	9804	1273	13	0.010212097407698	0	83
DPQEj8w5iHM	OS 20 ALIMENTOS MAIS SAUDÁVEIS	no		1513204455	Dr. Uronal Zancan	UCVqS-HRwe2vq_Jjgu4fg-UA	Education	560104	27376	983	0.035907364114553	0	1505
cx2vMC3wSo4	Autismo- 10 Coisas que todo autista gostaria que você soubesse 2/2	no		1551980951	Diário de um autista	UCbhT_vtlwr7X2wG6q_0mWVQ	Film & Animation	161289	19115	65	0.0034004708344232	0	557
cA1i06qsPe4	O que é ABA? Vídeo Definitivo Sobre a Análise do Comportamento | IEAC	no		1506097223	Instituto de Educação e Análise do Comportamento	UClGVPnkZ62SuUbE4EqTDIYg	Education	40556	1851	104	0.056185845488925	0	54
uou3PsajhVM	Autismo: Vem Aumentando a Quantidade de Casos. Por Quê?	no		1528966563	Henrique Lima	UCLS-udF3quRKFcnQTpjmrRw	People & Blogs	476	41	1	0.024390243902439	0	3
YnwZviKH3Qs	AULA 3 ESTÁ NO AR	no		1578755398	Dr. Uronal Zancan	UCVqS-HRwe2vq_Jjgu4fg-UA	Education	2804	293	6	0.020477815699659	0	4
UXHpNl327SI	É MUITO MAIS FÁCIL PERMANECER JOVEM DO QUE REVERTER O ENVELHECIMENTO	no		1575501612	Dr. Uronal Zancan	UCVqS-HRwe2vq_Jjgu4fg-UA	Film & Animation	7522	1057	8	0.0075685903500473	0	91
MdTXZyWp77k	Como era o Comportamento do meu filho bebê com autismo até os dois anos de idade	no		1528510524	Autista Sem Regras	UCuFi5ZBiy2IgvwVRRhsazQA	People & Blogs	73157	2185	105	0.048054919908467	0	218
mpMBLGRBU2g	Como Ganhar Massa Muscular Com o Cérebro Reptiliano	no		1460456411	Dr. Uronal Zancan	UCVqS-HRwe2vq_Jjgu4fg-UA	People & Blogs	47784	3148	33	0.010482846251588	0	127
8Az_U51ckB0	9º DIA DO WORKSHOP - AULA 4- O PRINCÍPIO ÚNICO PARA A CURA DE TODAS AS DOENÇAS	no		1538523317	Dr. Uronal Zancan	UCVqS-HRwe2vq_Jjgu4fg-UA	Film & Animation	3526	421	4	0.0095011876484561	0	22
GLP_6LHL1dk	AUTISMO LINGUAGEM E FALA I MARIA CLAUDIA BRITO	no		1532037049	Dra Maria Claudia Brito	UCFbx6QBTcDI6toOnO-EyajQ	People & Blogs	13413	1039	8	0.0076997112608277	0	99
d6xaX5NJn_I	👼🏻🙏 2 DE ABRIL (DIA MUNDIAL DA CONSCIENTIZAÇÃO DO AUTISMO) - MAIRY RIBEIRO	no		1522635740	Mairy Ribeiro	UCcpEuvf0WL27bLso2tK1DLQ	People & Blogs	9069	252	1	0.003968253968254	0
xRl35AsbiCo	Autismo dúvidas e mais! | Entrevista com o neuropediatra Dr. Carlos Gadia | IEAC	no		1531090813	Instituto de Educação e Análise do Comportamento	UClGVPnkZ62SuUbE4EqTDIYg	Education	3967	251	7	0.027888446215139	0	13
bgwuT0R_CV4	ASTAXANTINA. O ANTIOXIDANTE MAIS PODEROSO DO MUNDO | Dr. Dayan Siebra | Dr. Dayan Siebra	no		1539270608	Dr. Dayan Siebra	UClN6OLbLp1YjTSwDOkEM2dA	Entertainment	134317	20400	136	0.0066666666666667	0	1068
_lBCN5N2L1g	10 PRODUTOS QUE CAUSAM CÂNCER E ESTÃO NA SUA CASA!	no		1548719591	Dr. Dayan Siebra	UClN6OLbLp1YjTSwDOkEM2dA	Entertainment	970136	86810	1779	0.020493030756825	0	4641
LsSa_PwDVdQ	AUTISMO E ALIMENTAÇÃO - 1	no		1513649714	Dra Tielle Machado	UC4_WOkaSB6TMFad-v0T6qmg	People & Blogs	24850	1453	35	0.024088093599449	0	89
DTJWarlyBVc	Vídeo educativo - Autismo	no		1447027862	Paula Penteado	UC9Xzfea9PyVFl_jmbKVuxAg	People & Blogs	293363	4570	124	0.027133479212254	0	127
SDRVtuZ1JJM	MENOPAUSA e Climatério - O que você PRECISA saber	no		1532880916	Dr. Ícaro Alves	UCewz-5dLWu_rswIMStBBI1Q	Nonprofits & Activism	19688	1228	17	0.013843648208469	0	116
yFVaTDfLP8w	[AO VIVO] - Tudo sobre Menopausa com Dra. Denise de Carvalho	no		1522889527	Jolivi Saúde	UCzDQaYfHMJrXfw46whk6hIg	Education	17498	1434	35	0.024407252440725	0	61
wyu7hmqyrOg	As 7 da Caras - Dr Barakat	no		1537974009	CARAS Brasil	UCAcm_kK9LeKsqntNX_5J9Rg	Entertainment	76120	3629	73	0.020115734362083	0	163
1DOlS0iZez4	Autismo - explicando o autismo?	no		1522841344	Aline Vicente	UCA1nC2t2zfzBOySscmpIzGQ	People & Blogs	21848	2538	20	0.0078802206461781	0	118
f8Vgg1leoMo	7 atitudes que podem te livrar de uma depressão | Dr Dayan Siebra	no		1539131565	Dr. Dayan Siebra	UClN6OLbLp1YjTSwDOkEM2dA	Entertainment	69660	13461	100	0.0074288685833148	0	609
IilBy-Tk79c	E-book - Autismo: A Epidemia Oculta	no		1495053484	Nosso Futuro Roubado	UCZMequcevIbkS-_LLAizS1w	People & Blogs	1071	17	0	0	0	2
3BVfgUNnIIY	Laguna realiza 4ª Caminhada pela Conscientização do Autismo	no		1522698772	UnisulTV	UCoPDcjdXmHCFyW7Pz9DBCOQ	News & Politics	224	7	1	0.14285714285714	0	1
zfzBqjqi9HM	URGENTE!!! Óleo de coco é veneno??? Ivandélio Sanctus	no		1535242433	Ivandélio Sanctus	UCdKg0aioEqn_tbfBGz_ltFw	Entertainment	57828	6463	149	0.02305430914436	0	723
1odBkGD_Uzo	Dr Lair responde vídeo viral do Dr. Fernando Lemos sobre limão faz bem ou faz mal?	no		1547523815	U MIÓ QUE TÁ TENO	UC4F32QLrpDmmRrozxr9z59g	Science & Technology	696996	29750	1816	0.061042016806723	0	8327
lecITZkWqzg	6 Hour Study Music Alpha Waves: Relaxing Studying Music Brain Power Focus Concentration Music ☯161	no		1411136777	Body Mind Zone	UCmQK52xYtdeg7EYiQhqEeZA	Music	5631999	15966	1185	0.074220217963172	0	961
bQvYZ0TkHjk	Setores do cérebro	no		1422374600	Minutos Psíquicos	UCFiEI1kDHlO9UQtxx0wj-XA	Education	251552	15965	97	0.0060757907923583	0	190
DOZhNkxeRnA	Webaula - Febre Amarela - Janeiro 2018	no		1516375687	Centro de Telessaúde HC-UFMG	UCnyFZr3wJBAJRjcqr_Q5Gug	Education	18087	374	16	0.042780748663102	0	14
WPni755-Krg	Study Music Alpha Waves: Relaxing Studying Music Brain Power Focus Concentration Music ☯161	no		1403779733	Yellow Brick Cinema - Relaxing Music	UCwobzUc3z-0PrFpoRxNszXQ	Music	129482594	615393	35742	0.058079958660563	0	68832
H7-w7kPp63c	Câncer de próstata | Terapias e alimentos que previnem	no		1520465568	Vencer o Câncer	UC8Ciiz3QHgziGJXa4BPY7sQ	Science & Technology	2933	74	4	0.054054054054054	0	1
Eqf8DkykKx4	Lesão cerebral	no		1303933813	Jornalismo TV Cultura	UCXdXYG8dUmEv6jhEji_lSHg	News & Politics	28793	175	12	0.068571428571429	0	2
x61lq-Ptscg	VISÃO | Doenças neurológicas que afetam a visão	no		1539027058	De bem com a Vida	UCY3bccBm-_J8m0-SQz2AbAg	Entertainment	5482				0
4aWIIU1rRyU	5 causas que podem levar à perda de memória ( MEMÓRIA)	no		1549015336	Julio Pereira - Neurocirurgião	UCC1_Drela_P4MAW8pPcdjSw	Education	6973	315	10	0.031746031746032	0	14
por7LssFrx4	AUTISMO INTERVENÇÃO PRECOCE E NEUROPLASTICIDADE I MARIA CLAUDIA BRITO	no		1492052712	Dra Maria Claudia Brito	UCFbx6QBTcDI6toOnO-EyajQ	People & Blogs	13820	538	19	0.035315985130112	0	12
4AgnT75niNY	Webpalestra - Manejo e tratamento das infecções pelo vírus Influenza	no		1523564514	TelessaudeSC	UCg3fYev0mdtUvJvFJpQUM8g	Education	4826	151	5	0.033112582781457	0	5
fQN32qR_M2Y	Mais de 10 anos com o tratamento com vitamina D p/ esclerose múltipla	no		1356111247	Daniel Cunha	UCCUJDced0JrM5EmfdnhuRJw	Nonprofits & Activism	65889	903	21	0.023255813953488	0	115
PZykDQRf2Lg	MANHÃ TOTAL - Reabilitação labiríntica traz exercícios que controlam a tontura	no		1511446018	TV Paranaíba	UCEKBa8byszeoA0f7lt1ledg	News & Politics	18605	365	17	0.046575342465753	0	1
Tdjyjp8gP4s	Dicas Para Quem Acabou de Descobrir que Está Grávida	no		1481402795	Dr. Igor Padovesi	UC3O9y5JRSBqn4YhCEvBys_Q	People & Blogs	240040	12135	66	0.0054388133498146	0	491
pm3do0nEuuM	Vírus Zika | Nerdologia	no		1449752401	Nerdologia	UClu474HMt895mVxZdlIHXEA	Science & Technology	626882	73055	212	0.0029019232085415	0	2173
3N4zpKDTMIU	Ministério da Saúde esclarece boatos sobre microcefalia - Vacinas	no		1449858663	Ministério da Saúde	UC12zKGLhMhDeDidoctM6BrA	Nonprofits & Activism	10875	26	19	0.73076923076923	0	19
tTgcOkzWcJg	Material Sensorial(Trabalho desenvolvido com autista)	no		1447047104	Mai Rob	UCeGhoo58OOV262hAkG2eBnQ	People & Blogs	44032	561	20	0.035650623885918	0	25
oq_1yc85u38	Soro e Vacina - Brasil Escola	no		1514311209	Brasil Escola	UCsgHWN8lYveMUEWTDheTjZA	Education	11451	601	7	0.011647254575707	0	20
A_8nZrgcKZM	Inflamação e depressão | Dr Fernando Fernandes	no		1521760122	Psiquiatra Fernando Fernandes	UCemIxU4HzIhVLeohT7eUUoA	Education	4539	637	5	0.0078492935635793	0	35
i1L6JmwJrMQ	A Importância do Fator RH na Gravidez	no		1420829522	Danny Martins	UCNy6EtpfR05_vGNPkb-xQBA	People & Blogs	60424	531	36	0.067796610169492	0	256
5U4fkrUHz1U	Encefalite autistica da vaccino: mamma Margherita al congresso della FIMP di Verona...	no		1365500207	Avv. Saverio Crea	UCl4jPGdW6YDo-1KgU5q8T1g	Nonprofits & Activism	859				0
R6r1YQ-zJdg	16 Formas de Lidar com o Autismo... Aprenda!	no		1311802952	Diego Ferreira	UCo9oJoBqutAtWI5Jb-_EQWQ	Education	58041	381	4	0.010498687664042	0	22
-tyyGDBj4L4	Anemia Falciforme INCT do Sangue	no		1380143792	INCT do Sangue	UCGKQmZBLf_233edf8XzteqQ	Nonprofits & Activism	15872	180	1	0.0055555555555556	0	2
TJEl56FQX2M	As fases da doença de Alzheimer	no		1346373318	EFCAS1000	UCfEQnRUpLwlf85pcXBukT_A	Education	190629	1810	30	0.016574585635359	0	40
ihoSoKv_niY	Água dos Milagres - Testes e comprovações.	no		1438038041	Eduardo Salomão	UC-RhfF4_tepYCgSZuGLSzpw	Entertainment	87125	1707	45	0.026362038664323	0	203
7LP8vmckbYE	Apresentação do MMS - Parte 2	no		1528945178	Andre Chilano	UC-v1PJRoid6DGFzY1jVU3hg	People & Blogs	7504	552	9	0.016304347826087	0	59
5BFhmht7SSo	Estudo analisa o comportamento cerebral do autismo.mp4	no		1289610340	zaogo	UCWQwXKcH-8eB-rojhacigEA	Education	4160	45	2	0.044444444444444	0	0
PW7xAm1carU	Como as vacinas são produzidas? - Todo Seu (06/04/18)	no		1523305358	Todo Seu	UCW4t6ozY9VDVeN_GHK260BQ	Entertainment	11132	216	17	0.078703703703704	0	14
C8SGKfiaS_s	Autonomia e as tarefas domésticas	no		1542893985	Criar e Crescer	UCgbbjw8zPkrmmL_XU1SgJBg	Education	2300	380	1	0.0026315789473684	0	26
zMRRAuLF-ts	A importância do Brincar na fase adulta	no		1581354014	Criar e Crescer	UCgbbjw8zPkrmmL_XU1SgJBg	Education	489	60	2	0.033333333333333	0	1
0Zfgr90jn5k	Desenvolvimento e Produção de Vacinas	no		1519314636	Instituto Butantan	UC5Bh3Ljo71O9uML6paQVAfQ	Science & Technology	4061	93	5	0.053763440860215	0	7
8yYQ7s_NJ5I	VACINA ROTAVÍRUS | Calendário de vacinação infantil | VORH | Parte 6	no		1526850206	Enfermundo	UC8IbAhPglJ1OeC44A_Gtmqg	Education	21332	665	21	0.031578947368421	0	16
nz3P1HPMDfU	Parto Normal é um fenômeno biológico	no		1577887207	Criar e Crescer	UCgbbjw8zPkrmmL_XU1SgJBg	Education	1481	163	3	0.01840490797546	0	7
PrWdhQPJ72Q	Parto Humanizado na Atualidade	no		1576519203	Criar e Crescer	UCgbbjw8zPkrmmL_XU1SgJBg	Education	1076	135	1	0.0074074074074074	0	12
rZSacLHk97w	Autismo: Epidemia ou maior evidência?	no		1577282411	Criar e Crescer	UCgbbjw8zPkrmmL_XU1SgJBg	Education	1982	185	4	0.021621621621622	0	5
yAjdC3X4ryw	A importância da rotina na vida da criança	no		1538748009	Criar e Crescer	UCgbbjw8zPkrmmL_XU1SgJBg	Education	7418	465	10	0.021505376344086	0	14
fuNyY5mxG7E	Educação X Punição: Qual a melhor alternativa?	no		1545246847	Criar e Crescer	UCgbbjw8zPkrmmL_XU1SgJBg	Education	6002	616	5	0.0081168831168831	0	54
J9Kzgy_bRWw	Aproveite o verão com cuidados!	no		1577109604	Criar e Crescer	UCgbbjw8zPkrmmL_XU1SgJBg	Education	1090	159	3	0.018867924528302	0	2
VxcX6S8mwhQ	Primeiros dias do bebê: vacinas e outras dúvidas - Criar e Crescer	no		1462973401	Criar e Crescer	UCgbbjw8zPkrmmL_XU1SgJBg	Education	37983	1920	22	0.011458333333333	0	41
HgvYdfpL4b4	Crianças com intolerância a proteína do leite devem evitar algumas vacinas	no		1417183399	Aperipê TV	UCQbKXPyFsK-j0haJE0PGvhA	News & Politics	172	1	0	0	0
vR27Qv-x1vI	O que é medicalização?	no		1576074608	Criar e Crescer	UCgbbjw8zPkrmmL_XU1SgJBg	Education	1516	145	1	0.0068965517241379	0	6
AcSNG5n4jJ0	Produtos Químicos: os vilões no dia a dia das crianças	no		1575471604	Criar e Crescer	UCgbbjw8zPkrmmL_XU1SgJBg	Education	1938	325	2	0.0061538461538462	0	10
VS8UBjkVLYU	Porquê a Vacina da Gripe parece NÃO FUNCIONAR - Dr Lucas Fustinoni - Médico - CRMPR 30155	no		1521370433	Dr Lucas Fustinoni	UCjVPaRkoIgq_Whb1QkJjGKg	People & Blogs	9134	1068	20	0.0187265917603	0	60
O-7UI4FQTf4	Como envelhecer	no		1535575432	Metrus Instituto de Seguridade Social	UC3UMFl4FxufRp6YErllpxHQ	News & Politics	67025	4198	107	0.025488327775131	0	87
snDZAUH-Ec4	Cálculo de Benzetacil (Penicilina G) | Explicação + Exercício	no		1519141839	Enfermundo	UC8IbAhPglJ1OeC44A_Gtmqg	Education	18187	662	22	0.033232628398792	0	24
3-hlMxvU_ew	Ferritina e Alimentação.	no		1547643786	Dra. Joely Pucci	UCecR2Q4C3RJxAr7joOKNxww	People & Blogs	16535	1031	34	0.032977691561591	0	54
NzlntFS0Gn8	Autismo: 8 Passos Para Ensinar a Falar - como fazemos	no		1539093497	Mayra Gaiato	UC42k7FI53tnSSIjgzW-rbLA	Education	59244	4143	28	0.0067583876418055	0	151
NoT2o9KURCM	Dengue - Receita Poderosa 100% Natural!	no		1526252293	Professor Fernando Braga	UCZ4wREznHPRuUz-ghmp7KGw	Education	33429	2277	58	0.025472112428634	0	154
raAoO9pvGMA	O PODER do Mírtilo e do açafrão na luta contra o câncer Liberado a palavra do Dr Lair	no		1548969363	U MIÓ QUE TÁ TENO	UC4F32QLrpDmmRrozxr9z59g	Pets & Animals	190809	13587	187	0.013763155957901	0	623
HTmx7rdWprM	Esclarecimento	no		1555172958	Jaime Bruning	UCz84Tivi_d214XXnxGbtKHQ	Science & Technology	19404	2564	14	0.0054602184087363	0	206
blaT-SSn7G4	Leite devo ou não tomar? Verdades definitivas.	no		1555424265	Dr. Fernando Lemos	UChXNyp6dL_aY_3qwVgDd-EQ	People & Blogs	377249	55268	2207	0.039932691611783	0	1907
syA6bkZMd6s	A verdade sobre a febre amarela e a vacina - Dr Lair Ribeiro	no		1517357720	O NATURAL É MELHOR	UCwQhAc44SfDvhdCQiHluBVQ	People & Blogs	209409	7753	343	0.044240938991358	0	367
TxDo41hsPac	CÂNCER: Uma aula que vai entrar para a história - Dr. Lair Ribeiro	no		1551315835	O NATURAL É MELHOR	UCwQhAc44SfDvhdCQiHluBVQ	People & Blogs	244982	19298	342	0.017722043735102	0	717
EIrTJBqmlY8	037 - O que penso do Olavo de Carvalho | Verdade dura e crua!	no		1509218812	Ciencia de Verdade	UCDoPuIvx88nh69fS5VJCNWg	People & Blogs	74677	11897	668	0.056148608892998	0	905
2RL6WbfzeJk	REVOLTA DA VACINA (em 5 minutos!) - Débora Aladim	no		1473804001	Débora Aladim	UCx7HKmnCIIbRBF2FjAoV0bg	Education	512047	51052	239	0.004681501214448	0	714
4CN_by9fiEE	O que é o treino Dikul e por que ele pode mudar sua vida	no		1525507164	INCRÍVEL	UCIQPHl1WKKTt9KkWyo_JNig	People & Blogs	833267	42251	716	0.01694634446522	0	361
CC7DcBuIlqQ	Como Saber Se Uma Pessoa É AUTISTA Só de Olhar Para Ela?	no		1506517483	Mamãe Tagarela	UCz1xVDltULzUhZCJ1TkvnTQ	People & Blogs	340357	15339	357	0.023274007432036	0	604
hSx5mqUyZuU	Cientistas Provam que Existem 13 Sinais de Inteligência Excepcional	no		1513038764	INCRÍVEL	UCIQPHl1WKKTt9KkWyo_JNig	People & Blogs	822550	37284	1440	0.038622465400708	0	1709
QcY--hamQ9Q	CAIU A FICHA MEU FILHO É AUTISTA - Mamãe de Dois #MeuFilhoEspecial	no		1459724742	Mamãe de Dois	UCiW6oCC0c_705F_BOWOVUKg	People & Blogs	75972	1736	116	0.066820276497696	0	189
DEEAP0gK5zs	10 Truques de Um Ex Agente do FBI Para Se Tornar 200% Atraente	no		1522234988	INCRÍVEL	UCIQPHl1WKKTt9KkWyo_JNig	People & Blogs	1059897	42351	1205	0.02845269297065	0	917
3sfOCYI3x2E	Sinais de AUTISMO EM BEBÊS (até 2 anos): quais são e como reconhecer.	no		1527087601	Mamãe Tagarela	UCz1xVDltULzUhZCJ1TkvnTQ	People & Blogs	2010019	46723	2824	0.060441324401258	0	1552
zZDkk31QHHg	Tomei vacina 💉 e chorei 😂😂	no		1487812575	Eu você e nós	UC6nYtmaMh43WUQW5YeopuNg	People & Blogs	634749	25351	1299	0.051240582225553	0
x367OUC7zw8	LIDANDO COM A ANSIEDADE - MONJA COEN	no		1509212166	O Lado Bom do Mundo	UCnNvQI_yyWPZGI-rqFhR17Q	People & Blogs	180366	12100	118	0.0097520661157025	0	158
d-LtPfEwh5I	8 Hábitos Que Podem Fazer Você Ficar Pobre	no		1528135333	INCRÍVEL	UCIQPHl1WKKTt9KkWyo_JNig	People & Blogs	429310	15750	644	0.040888888888889	0	549
gYv-BMHlstU	Antes de Começar a Tomar Vitaminas Veja Isto Para Evitar Problemas	no		1519336189	INCRÍVEL	UCIQPHl1WKKTt9KkWyo_JNig	People & Blogs	611142	49374	723	0.014643334548548	0	693
Ohug1xSNm_o	TOMANDO VACINA - TREMI E MORRI DE MEDO SIM!	no		1504544994	Sweet Carol	UCTFCMkTZPwi_PjerXYxDscA	Entertainment	310142	9468	420	0.044359949302915	0	699
DVsT5gdsiuk	OS 6 SUPLEMENTOS MAIS IMPORTANTES NO AUTISMO	no		1522967400	Dra Tielle Machado	UC4_WOkaSB6TMFad-v0T6qmg	People & Blogs	29913	2156	50	0.023191094619666	0	74
EJANb5-04FE	NÓS MERECEMOS FINAIS FELIZES	no		1532428407	O Lado Bom do Mundo	UCnNvQI_yyWPZGI-rqFhR17Q	People & Blogs	353	78	0	0	0	11
mZgLIZdefq4	Emoções: quando as emoções adoecem o corpo?	no		1457616600	Terapia Cognitiva Online	UCFPV1zBY8TVYEnjMesCf17Q	Education	11940	663	8	0.012066365007541	0	39
YsippXD47Vc	5 Fatos sobre Medicações psiquiátricas | Psiquiatra Fernando Fernandes	no		1470162826	Psiquiatra Fernando Fernandes	UCemIxU4HzIhVLeohT7eUUoA	Education	48757	2999	96	0.032010670223408	0	258
hmIACmtr2oU	Frases para não falar para autistas e pais de autistas	no		1501689761	Andréia Camargo	UCjrmFzNfoXO-We5rT6jB4vg	People & Blogs	114438	8273	151	0.018252145533664	0	447
nA7rHuJOIMI	ENTENDENDO A ANSIEDADE - LIA DISKIN	no		1508410804	O Lado Bom do Mundo	UCnNvQI_yyWPZGI-rqFhR17Q	People & Blogs	2879	199	0	0	0	8
bjdOErjaUeY	Teste de QI de 5 Perguntas que Vai Detectar o Seu Intelecto	no		1518308648	INCRÍVEL	UCIQPHl1WKKTt9KkWyo_JNig	People & Blogs	454636	21740	2300	0.10579576816927	0	2030
mHjlCK5Casw	NOTÍCIA PRA CARAMBA	no		1507723251	O Lado Bom do Mundo	UCnNvQI_yyWPZGI-rqFhR17Q	People & Blogs	1484	122	2	0.016393442622951	0	18
idvuoZWuiE4	PORQUE PESSOAS INTELIGENTES TEM POUCOS AMIGOS? PSICOLOGIA	no		1522241924	Jane-Six Psicologia Social	UCXTI4ER3d0UPT4WxFYI082w	People & Blogs	405064	31225	697	0.022321857485989	0	4367
6tdYlyQO5bU	IDEOLOGIA DE GÊNERO: A VERDADE	no		1530381080	O Lado Bom do Mundo	UCnNvQI_yyWPZGI-rqFhR17Q	People & Blogs	535	109	5	0.045871559633028	0	13
vazEjRxCK8Y	Goodcast #04 - Retrospectiva do Semestre	no		1564422179	O Lado Bom do Mundo	UCnNvQI_yyWPZGI-rqFhR17Q	People & Blogs	155	27	1	0.037037037037037	0	4
S8DJkSy0bho	O mundo na visão de um Autista	no		1491160263	Nei Rodrigues	UCJS-Vcf3aR_vEX5F7oPIqnA	Entertainment	1481238	43911	847	0.019289016419576	0	2720
fk9ASg3I3vc	Goodcast #02 - o podcast de boas notícias	no		1530624872	O Lado Bom do Mundo	UCnNvQI_yyWPZGI-rqFhR17Q	People & Blogs	151	26	0	0	0	7
hfqkSDkIf8c	Goodcast #01 - o podcast de boas notícias	no		1529785566	O Lado Bom do Mundo	UCnNvQI_yyWPZGI-rqFhR17Q	People & Blogs	274	59	0	0	0	8
Hn6WrqtwC8g	Autismo - Depoimento e Dicas Práticas	no		1522698910	Débora Moreira	UCT3P3oWIt21UsHi_wwDG8Yg	People & Blogs	51828	4111	43	0.010459742155193	0	411
S2p1Owwrk9s	A CORRELAÇÃO ENTRE VACINAS MERCÚRIO E AUTISMO A FRAUDE OCULTADA PELO CDC	no		1465585258	HUMANÆ LIBERTAS	UC0bD2v2yi9WoiupiOMV951Q	Nonprofits & Activism	324				0
0gJfRsD7KpU	BBB 20 AO VIVO - Bate Papo sobre o Reality	no		1581341211	Chat Reality	UCeSN0y5uE3Q_aAFdBoPaueQ	People & Blogs	1960	73	6	0.082191780821918	0	0
QN5yJ4y_c74	O MONSTRO DAS CORES - histórias sobre sentimentos | Fafá Conta	no		1566511203	Fafá conta histórias	UC9fxSdFjcz5QWDEhYCk_k1w	Entertainment	15277	818	16	0.019559902200489	0	78
592PvSW279A	A BRUXA DO BATOM BORRADO - história infantil por Fafá conta	no		1503138601	Fafá conta histórias	UC9fxSdFjcz5QWDEhYCk_k1w	Entertainment	70941	2587	68	0.026285272516428	0	76
zdDWDI88mGo	E O DENTE AINDA DOÍA - história infantil contada por Fafá conta	no		1510954203	Fafá conta histórias	UC9fxSdFjcz5QWDEhYCk_k1w	Entertainment	43267	1583	47	0.029690461149716	0	66
kwCGcSJQvrI	A importância da vacinação	no		1511961602	TV Senado	UCLgti7NuK0RuW9wty-fxPjQ	News & Politics	2927	62	6	0.096774193548387	0	2
uwwnFQPeABg	MARCELO MARMELO MARTELO - história infantil contada por Fafá conta	no		1499509802	Fafá conta histórias	UC9fxSdFjcz5QWDEhYCk_k1w	Entertainment	123269	5501	126	0.022904926377022	0	122
a-NJ-xCyQsU	UMA LAGARTA MUITO COMILONA - contação de história por Fafá conta.	no		1475056800	Fafá conta histórias	UC9fxSdFjcz5QWDEhYCk_k1w	Entertainment	72762	1875	58	0.030933333333333	0	77
H8wytK9jj_4	AS CERTEZAS DE JOANA - história contada | Fafá Conta	no		1567720800	Fafá conta histórias	UC9fxSdFjcz5QWDEhYCk_k1w	Entertainment	4519	379	4	0.010554089709763	0	20
u5rfSoNSL30	SÓ UM MINUTINHO - história contada | Fafá Conta	no		1541109604	Fafá conta histórias	UC9fxSdFjcz5QWDEhYCk_k1w	Entertainment	11050	418	10	0.023923444976077	0	34
eL5v3Lp9lsE	Fátima e o fogo mágico - Fafá conta histórias pra APACN #salvasonhos 01	no		1533647700	Fafá conta histórias	UC9fxSdFjcz5QWDEhYCk_k1w	Entertainment	5128	243	8	0.032921810699588	0	11
f61tsJRYjfU	O GRÚFALO história infantil contada | Fafá Conta	no		1532642406	Fafá conta histórias	UC9fxSdFjcz5QWDEhYCk_k1w	Entertainment	38895	1443	32	0.022176022176022	0	44
8BZ8pvWMiV0	A ANTA E O PLOFT - história contada para crianças e adultos | Fafá Conta	no		1553205602	Fafá conta histórias	UC9fxSdFjcz5QWDEhYCk_k1w	Entertainment	8426	314	7	0.022292993630573	0	20
o_aV5RUTkC0	A MÃE QUE VOAVA história pro dia das mães | Fafá Conta	no		1556834406	Fafá conta histórias	UC9fxSdFjcz5QWDEhYCk_k1w	Entertainment	6967	403	6	0.014888337468983	0	20
z40CGS-g0vs	MEU AMIGO FAZ iiiii - contação de histórias por Fafá conta	no		1497090600	Fafá conta histórias	UC9fxSdFjcz5QWDEhYCk_k1w	Entertainment	39999	2561	25	0.0097618117922686	0	67
dF5XBTawwIo	Doença e vacina | Cocoricó	no		1525203001	Cocoricó	UCA6Roeo-qFVk3jvjAdag7Uw	Entertainment	198006	795	168	0.21132075471698	0	43
QJvUeDPwRP8	Como lidar com a fase de bater e morder do seu filho? | Momento Papo de Mãe	no		1507197603	Papo de Mãe TV Cultura	UCQdOZmbeT9UoQy8G3zeNE-g	Entertainment	62228	1547	73	0.047188106011635	0
a3ZlKyKfGLs	RECEITA PARA FAZER UM PRÍNCIPE | Fafá Conta	no		1581028203	Fafá conta histórias	UC9fxSdFjcz5QWDEhYCk_k1w	Entertainment	863	91	4	0.043956043956044	0	7
1x394CAgglw	AOS OLHOS DO MAR história contada | Fafá Conta	no		1558648800	Fafá conta histórias	UC9fxSdFjcz5QWDEhYCk_k1w	Entertainment	3718	277	11	0.03971119133574	0	14
T00Oce1SSdc	DANDARA DOS PALMARES - contação de história | Fafá Conta e Cássia Damasceno	no		1542315602	Fafá conta histórias	UC9fxSdFjcz5QWDEhYCk_k1w	Entertainment	11729	832	7	0.0084134615384615	0	29
UL6udFcyBPE	O PÁSSARO E O REI - história da tradição oral | Fafá Conta	no		1558044000	Fafá conta histórias	UC9fxSdFjcz5QWDEhYCk_k1w	Entertainment	4446	363	6	0.016528925619835	0	9
EhpjwaXnmv4	Quais Vacinas a Gestante Deve Tomar?	no		1480108738	Dr. Igor Padovesi	UC3O9y5JRSBqn4YhCEvBys_Q	People & Blogs	111965	7329	79	0.010779096738982	0	235
Jl2I_v_wf-g	MACACO DANADO história infantil dia das mães | Fafá Conta	no		1526074200	Fafá conta histórias	UC9fxSdFjcz5QWDEhYCk_k1w	Entertainment	12001	479	10	0.020876826722338	0	20
qGbvQQWbVMo	YAKUBA - história sobre coragem e compaixão | Fafá Conta	no		1565301606	Fafá conta histórias	UC9fxSdFjcz5QWDEhYCk_k1w	Entertainment	5016	267	4	0.01498127340824	0	17
1vED5Ok0ots	O VAQUEIRO QUE NUNCA MENTIA conto da tradição oral | Fafá Conta	no		1553810402	Fafá conta histórias	UC9fxSdFjcz5QWDEhYCk_k1w	Entertainment	4506	247	0	0	0	17
8aBa0ta0_XY	DINOSSAUROS PODEM SER ADESTRADOS?! Fafá Conta curiosidades	no		1536174084	Fafá conta histórias	UC9fxSdFjcz5QWDEhYCk_k1w	Entertainment	1545	101	2	0.01980198019802	0	7
QBF-eXOG3no	A PROFESSORA ENCANTADORA - história infantil pro dia dos professores | Fafá Conta	no		1538690401	Fafá conta histórias	UC9fxSdFjcz5QWDEhYCk_k1w	Entertainment	9465	379	8	0.021108179419525	0	35
AjAsAVkF01M	Número elevado de casos de sarampo | Dr. Salim	no		1522098936	Jovem Pan News	UCP391YRAjSOdM_bwievgaZA	News & Politics	750	29	2	0.068965517241379	0	3
Z186fLyY4B8	MORANGO SARDENTO - Fafá Conta e Carol Levy juntas contando história pro dia das crianças!	no		1539295202	Fafá conta histórias	UC9fxSdFjcz5QWDEhYCk_k1w	Entertainment	6608	287	4	0.013937282229965	0	26
WYbZ-UFEvHo	O PINTINHO RUIVO DE RAIVA história infantil contada | Fafá Conta	no		1532037586	Fafá conta histórias	UC9fxSdFjcz5QWDEhYCk_k1w	Entertainment	9381	418	16	0.038277511961722	0	23
ERlb1lAJ7As	Thiago Luísa e os Salva Sonhos - Fafá conta histórias pra APACN #salvasonhos 04	no		1535462100	Fafá conta histórias	UC9fxSdFjcz5QWDEhYCk_k1w	Entertainment	974	80	1	0.0125	0	5
UCvfOd6DlDA	A CONTAGEM DOS SACIS - história infantil pro Dia do Saci | Fafá Conta	no		1540504803	Fafá conta histórias	UC9fxSdFjcz5QWDEhYCk_k1w	Entertainment	6665	223	7	0.031390134529148	0	9
-aiOs0m3Yd4	Precisa tomar a vacina da gripe todos os anos?	no		1524158463	Ministério da Saúde	UC12zKGLhMhDeDidoctM6BrA	Nonprofits & Activism	2317	37	4	0.10810810810811	0	0
N1sEHXIoC9M	Protestos Contra Campanhas de Vacinação	no		1497045602	Aulalivre - Enem 2020 e vestibulares	UC4zG6UeNUn-HM6UEFFkiESA	Education	5867	317	18	0.056782334384858	0	44
b6bfwy9WJyQ	História pro dia dos pais - educação infantil | Fafá Conta	no		1564524002	Fafá conta histórias	UC9fxSdFjcz5QWDEhYCk_k1w	Entertainment	2241	118	2	0.016949152542373	0	4
5wseA00941w	VACINAS ATRASADAS NINA E MANUH - Tiago e Gabi 882	no		1534896650	Tiago e Gabi	UCPaL0Om2geEJyjncqTGm49A	People & Blogs	46209	7074	64	0.0090472151540854	0	469
mwa89dKaiCA	VACINAS DAR OU NÃO DAR - TUDO O QUE VOCÊ PRECISA SABER | Mamãe Felícia	no		1530468003	Mamãe Felícia	UCoU-1x87QJJA2mA9iQpWiUw	People & Blogs	2081	204	3	0.014705882352941	0	11
7QNHecXOEOw	VACINA ATRASADA - como colocar em dia?	no		1470255803	WELIDA DANCINI	UCORRcj9wv5DEYCEg2LhBcLQ	People & Blogs	15999	242	19	0.078512396694215	0	21
s-sqkuO9VU4	REFLEXÃO: VACINAR OU NÃO VACINAR?	no		1492652801	Eloy s	UCZh5UuRs3JNPQvAcJ1UQQcQ	Science & Technology	159	11	0	0	0	0
Y4K2_bY6hdQ	SIGNOS FAZENDO PROMESSAS PARA 2018 - Inferno Astral | signo	no		1513688405	Inferno Astral	UCtzbjh-OJFkaHqSjvWJs87g	Entertainment	410937	37602	560	0.014892824849742	0	2188
IwwsKPxSdI8	Veja os riscos de não vacinar as crianças contra doenças	no		1532697586	SP no Ar	UCQKBmUf2GZUXRQFpzCPN5og	News & Politics	1649	16	2	0.125	0	1
E2b1LDzYHUk	Vacinas contra Varicela já estão disponíveis em Varginha	no		1379452513	TV Princesa Varginha-MG	UCLOJpGk3n2cACK7NzvmRGog	News & Politics	174	0	0		0	0
gBK3zOlVqLg	Vacinar ou não vacinar? Eis a questão...	no		1532899698	Nós e o Universo	UCuQ_uyOC8xbdo2M-jNZfM8A	People & Blogs	7309	779	57	0.073170731707317	0	35
0QfL_ofRn9g	Mitos e Verdades - Ovo	no		1467230972	Domingo Espetacular	UCP-Vg2PcmLiWpEdvMI1R35w	Entertainment	666915	7864	640	0.081383519837233	0	169
v3joAGgYyL8	Procedimento Operacional Padrão: administração da vacina	no		1574452288	Ministério da Saúde	UC12zKGLhMhDeDidoctM6BrA	Nonprofits & Activism	884	59	0	0	0	1
bv4if4Gkzbo	Mitos e Verdades - Laranja	no		1467153732	Domingo Espetacular	UCP-Vg2PcmLiWpEdvMI1R35w	Entertainment	196431	2370	202	0.085232067510549	0	38
IdQ5zsyZBCE	Problemas Doutrinais da RCC	no		1508685476	MontfortAC	UCHajNRSj7qejzsPx7o2MHDQ	Education	28045	1080	230	0.21296296296296	0
9HxOuSDVvD0	Sobrevivência:10 Itens que você precisa ter!	no		1475326800	Celso Cavallini	UCl1eRuftjRdetdWkrbeDBGg	Education	665680	34491	447	0.012959902583283	0	1706
R2DvTnr1u58	20 Dicas pra Alagamentos e Enchentes que Podem Salvar Sua Vida!	no		1581352686	Celso Cavallini	UCl1eRuftjRdetdWkrbeDBGg	Education	4422	875	12	0.013714285714286	0	49
3_Q8i62nVvQ	Vacina contra a febre amarela em viagem internacional	no		1517351196	Jornal da Gazeta	UCNl_i-ggJbZNyOLlhE7yyhw	News & Politics	6871	94	1	0.01063829787234	0	4
gY35kZpsRjw	Os diferentes tipos de vacinas	no		1512489854	Assistência Farmacêutica Avançada	UClbjlUoxxs-Lc7V7tNVa8CQ	People & Blogs	8956	214	8	0.037383177570093	0	2
a6J4b-PcOlg	Vacina pública ou privada? - Conexão Futura - Canal Futura	no		1438355356	Canal Futura	UC2mmP8ysfyko40KSn90x6Og	Education	2955	62	1	0.016129032258065	0	2
Ti86JNzzGG4	Pra que Serve essa Parte das Multitools e Canivetes #EDC #CROSSTER	no		1575037685	Celso Cavallini	UCl1eRuftjRdetdWkrbeDBGg	Education	22075	2921	47	0.016090380006847	0	66
67A4yp96VnM	Como preparar Algodão com Vaselina Corretamente para Isca de Fogo #sobrevivência	no		1573254000	Celso Cavallini	UCl1eRuftjRdetdWkrbeDBGg	Education	24033	3570	25	0.0070028011204482	0	88
w5t1L4uxO5g	Como Pedir Socorro na Natureza #SOS	no		1573819217	Celso Cavallini	UCl1eRuftjRdetdWkrbeDBGg	Education	23663	3619	14	0.0038684719535783	0	92
iL-0jcd2-3M	Tudo sobre Binóculos - Gravado no Yellowstone #Crosster	no		1581118200	Celso Cavallini	UCl1eRuftjRdetdWkrbeDBGg	Education	16615	2459	19	0.0077267181781212	0	66
EEVutjlTR_Q	Como Organizar seus Equipamentos no Acampamento	no		1579302004	Celso Cavallini	UCl1eRuftjRdetdWkrbeDBGg	Education	25466	3766	38	0.010090281465746	0	83
3LiuWWWIUp0	Como Usar Serra de Poda em Sobrevivência e Bushcraft - Dicas Rápidas #acampamento	no		1574463600	Celso Cavallini	UCl1eRuftjRdetdWkrbeDBGg	Education	16281	2439	42	0.017220172201722	0	29
BoHVWw3NZAM	Tétano: causas sintomas e prevenção	no		1561660791	Ministério da Saúde	UC12zKGLhMhDeDidoctM6BrA	Nonprofits & Activism	20081	413	10	0.024213075060533	0	55
KhCkjNvRfTk	Produção de Vacinas - Todo Seu (09/10/17)	no		1507669194	Todo Seu	UCW4t6ozY9VDVeN_GHK260BQ	Entertainment	2709	56	0	0	0	3
zDS0t5riLnA	Estudo comprova eficácia da vacina contra o HPV	no		1562021536	Band Jornalismo	UCoa-D_VfMkFrCYodrOC9-mA	News & Politics	1298	23	4	0.17391304347826	0	1
iCYxb0IVxd0	É importante tomar a vacina da hepatite?	no		1563317576	Catraca Livre	UCv2svvDbMNunUuPs8hUUKVA	News & Politics	1271	103	3	0.029126213592233	0	3
EwtBkDtCURQ	TUDO QUE VOCÊ SEMPRE QUIS (E PRECISOU) SABER SOBRE VACINAS | MACETES DE MÃE	no		1560175200	Macetes de Mãe	UCTrx5uG9vJjTLloAH8hE-pg	People & Blogs	26750	2171	28	0.01289728235836	0	211
tMgs-BPcswk	Febre Amarela: que países exigem a vacina? DICAS DE VIAGEM	no		1494975602	Viajante Independente	UC2visps0yULA5lnn5Yjne9w	Travel & Events	15711	740	11	0.014864864864865	0	97
BB7BOz-exOQ	Papo Saúde - Calendário de vacinação: adolescentes e adultos	no		1545170273	TelessaudeSC	UCg3fYev0mdtUvJvFJpQUM8g	Education	4352	114	5	0.043859649122807	0	2
uACT140Ch2s	Papo Saúde - Calendário de vacinação: até 1 ano de idade	no		1543950941	TelessaudeSC	UCg3fYev0mdtUvJvFJpQUM8g	Education	7873	236	8	0.033898305084746	0	1
0Tawb3zeJC8	COMO DECORAR O CALENDÁRIO DE VACINA	no		1533740400	Instituto Sempre em Frente	UCi0LsOhnyJbnnN4fgmxhLCg	Education	24892	844	38	0.045023696682464	0	12
CBCmjxwgy7I	Temperatura da vacina	no		1572358145	GovernoRO	UCXgrwFrZfFQxwhdbsjYmwTg	News & Politics	529	7	0	0	0	0
lEfjLt80bok	Vacinas: quais delas são essenciais? // Viver Bem	no		1520619180	Unimed Fortaleza	UCUtDAMp91VCfHTZ9_ypKRPA	People & Blogs	1831	99	4	0.04040404040404	0	7
LJNcu3Ypfk4	VACINA PARA RINITE OU IMUNOTERAPIA. VEJA QUEM PODE TOMAR / Dr Paulo Mendes Jr - Otorrino em Curitiba	no		1516705036	Dr. Paulo Mendes Jr - Otorrino em Curitiba	UCakzOx146XgjzmVkK2xyX6g	People & Blogs	6565	186	10	0.053763440860215	0	20
qkSL79ZSJxo	Adultos também devem estar atentos ao reforço das vacinas	no		1498041103	TV Canção Nova	UCVrKQMmA2ew9LFzeIDaOFgw	Entertainment	473	8	2	0.25	0	0
06t3jNWXJdA	Quem não pode tomar a vacina de febre amarela?	no		1520262281	TV Senado	UCLgti7NuK0RuW9wty-fxPjQ	News & Politics	711	13	1	0.076923076923077	0	1
LnfzwZxL7bA	Vacinas do segundo mês do bebê: Reações? Rede pública? Rede privada?	no		1470963601	Thalita Campedelli	UClRUPXBd3zP3O1KCSeiMA2Q	People & Blogs	211272	3742	284	0.075895243185462	0
8OAUFLEeDAI	WebPalestra: 21ª Campanha nacional de vacinação contra a influenza	no		1554759262	Telessaúde ES	UChFIPDFYjTFg03eWlwmQcTA	Education	1341	60	4	0.066666666666667	0	2
ynQRenXgi-Y	Zika Vírus Dengue e Chikungunya	no		1450284992	Prof. Cássio Rossi - Coach de Aprovação	UCG0kQTTbkKjkKCMbWEIeUnQ	Education	289007	4592	254	0.055313588850174	0	240
jYfqWePD8mI	Contraindicação da vacinação | Pro Matre Paulista	no		1429115709	Pro Matre Paulista	UCMT22yw2FIvF7dW6dJ_6EnQ	Science & Technology	1768	5	0	0	0	0
jPQSJ8kPKMM	CUIDADOS PRIMEIRA VIAGEM: vacinas certificado internacional e dicas	no		1549836005	Apure Guria!	UC-6_6nA-v9W057U5sX3tTXg	Travel & Events	6258	407	7	0.017199017199017	0	49
qK7anhWAKzc	Investimento em vacinas farmadox verminase veio pelo Sedex | Criatório Neves	no		1537371708	Criatório Neves - Rodrigo Neves	UCDK0tciqGDB3Onhs7JJfimg	Pets & Animals	2116	141	0	0	0	22
zzgEXRHlQc4	O que foi a GRIPE ESPANHOLA? - Inteliogia History #1	no		1530375003	Inteliogia	UCdRdaVD3_JxbG7R4c9tembQ	People & Blogs	12229	761	7	0.0091984231274639	0	103
Spf1OC9ceWE	A vacinação e o sistema imunológico	no		1500409791	afpbr	UCamgdcs45ToPrIV7wmT7iYg	News & Politics	48660	1016	13	0.012795275590551	0	0
SqQgYIRqfAU	Médicos esclarecem quem deve e quem não pode tomar a vacina contra a febre amarela	no		1509236418	Jornal da Record	UCmpHPgeCBgvk_fDXZQKsnAA	News & Politics	48852	269	35	0.13011152416357	0	18
a4CkTZdZFgE	#1 - Período da Campanha Nacional de Vacinação contra Sarampo e Poliomielite	no		1533045170	Ministério da Saúde	UC12zKGLhMhDeDidoctM6BrA	Nonprofits & Activism	13481	128	8	0.0625	0	13
FqwrtvdpsWI	Sarampo: por que a doença voltou no Brasil e como preveni-la	no		1520875661	vejapontocom	UCV6Ue4o5UIeKQ3IEkjnXRlg	News & Politics	7562	93	12	0.12903225806452	0	9
aCeG1_U0zjA	IMUNOLOGIA BÁSICA - Dr Lair Ribeiro Vídeos	no		1457055283	Multimídia Produções	UCxm7PwK74oVJtyP0vN2qQIw	Education	228808	5539	123	0.022206174399711	0	0
GqWhQfgnmfw	BG - Alerta contra sarampo e poliomielite: campanha de vacinação começa em agosto - 09-07-2018	no		1531243922	Record TV Goiás	UCsdIGtyuyiW--cidQQ6KUsw	Entertainment	1986	20	0	0	0	11
YVktHOpgwFI	Dr Lair Ribeiro | UMA VERDADEIRA AULA sobre a Diabetes | Um DISTÚRBIO METABÓLICO (PARTE 4)	no		1536895148	Junior Hallak Medicina e Saúde	UCPR3gVNYBzi-02_O4noC1Zg	Science & Technology	151361	9887	162	0.016385152220087	0	185
jfoyDYtb8FA	AUTISMO LEVE? ♥Toque Materno Vlogs	no		1498143444	Toque Materno Vlogs	UCWeDz9iYFe7APda1DFMHLtw	People & Blogs	189786	7908	172	0.021750126454224	0
2zq8GTBbAUw	Sarampo & Doenças Reumáticas: Devo Me Vacinar?	no		1531443038	Reumato TV	UCxjXoEYzVFwvKD53-gvxhYQ	People & Blogs	1166	110	1	0.0090909090909091	0	17
XpEiQAXkbYY	Vacina contra o sarampo estão sendo disponibilizadas diariamente em Postos de Saúde	no		1531491192	Juruá Online	UCQGAqLdIBfVSB5qzTtT-Urg	News & Politics	1249	18	0	0	0	0
pV70DbiyQXU	20 - Vacinar ou não vacinar?	no		1501531007	Doutor Informação	UCTH-xd88WPq7KUjfzI9J1rg	People & Blogs	419	18	2	0.11111111111111	0	12
Y_aM3H2aM3E	Investigada morte de bebê após aplicação de vacina em Canoas	no		1531503675	Correio do Povo play	UCphn4Z4L2dGNoh7jz_99EOA	News & Politics	338	3	0	0	0	0
2byUvKDacGc	Ana Rita Cavaco - Prós e Contras - Vacinação	no		1493296299	Ordem dos Enfermeiros - Portugal	UCuDagVc79VVXXPFJurgXIiw	People & Blogs	1919	19	7	0.36842105263158	0	3
GfDb9LwC318	Vacina contra sarampo em pacientes com esclerose múltipla	no		1531779958	Esclerose Múltipla Rio	UCWRwxOGj58_MuQ9DTV1ylHA	Science & Technology	1144	72	1	0.013888888888889	0	1
bwl8C7L4KKA	Espaço Livre | Movimento Antivacinação	no		1527022501	TV CÂMARA SÃO PAULO	UCP8XlGjPSGj8JkuZ8hgDAJw	News & Politics	754	20	4	0.2	0	0
cCgMQPtugjc	Fundador do Tugaleaks reafirma a sua inocência	no		1425660961	ESCUDO pt	UCvLNnnIZdqXYqAS-l8FLJFw	News & Politics	4916	42	1	0.023809523809524	0	14
pP62PYHCDsA	ALERTA!!! Não Tome LEITE E IOGURTE!!! Dr. Lair Ribeiro Responde!!!	no		1539461458	SAÚDE & BEM ESTAR	UCe1XNXkGImWSq5n4wkzNjBw	People & Blogs	202147	12804	161	0.012574195563886	0	657
Eh9c4R6QY2o	Vacina da febre amarela Vai prejudicar saude milhares de pessoas	no		1516588235	Jackson Vilar	UC4DBEilLHyHmz4lAl0eGTFA	Music	439	18	2	0.11111111111111	0	0
xqBoD-ha6H0	Por Que Vacinar?	no		1423702824	Eu Ciência	UCmOqIaUBwlSK6lVGC2o46JA	Science & Technology	45874	4886	32	0.0065493246009005	0	311
pxpPowWbFqg	CAMPANHA VACINA SARAMPO 17 07 18	no		1531860288	TVM	UCU8Y4bqcr0unUI18EcVmo4Q	Entertainment	902	12	2	0.16666666666667	0	2
0yQdSmCwTFU	A Saúde Responde: É verdade que posso contrair autismo se tomar a vacina?	no		1495838399	Secretaria Municipal da Saúde de São Paulo	UCV32l4Xk6vXOemE60pZ41Sg	People & Blogs	50	2	1	0.5	0
V9x_vVQjXwI	H1N1: Saiba como identificar os sintomas; medidas preventivas e as diferenças da gripe comum	no		1526037921	Meio norte	UCfRVh-QaAzJ45hmNmlwT32g	People & Blogs	7865	89	10	0.1123595505618	0	2
qRdJpy4f-k8	Ozonio e autismo uma luz no fim do túnel	no		1520382129	Ozonio Cura	UCi3erzjE0p7H3CXsQNITzzA	People & Blogs	1322	50	0	0	0	2
Tx0KkneN3oc	VACINAS	no		1458605799	Rápidas Pinceladas	UCKwQfdV6NP-AAwbRtRJqwBg	People & Blogs	476	8	0	0	0	0
--_yA0wgTo4	Sócrates acusado de autorizar subornos no Euro 2004	no		1458834909	ESCUDO pt	UCvLNnnIZdqXYqAS-l8FLJFw	News & Politics	360	2	2	1	0	1
X6AzUMm6W0c	Desmentindo a Globo AO VIVO Sobre as Campanhas de VACINAÇÃO!	no		1493298326	FOGO VIVO de YAUH יהוה	UCIFYUiFUWCQzDc9nc6KY2Ig	People & Blogs	164064	2492	300	0.12038523274478	0	499
u4N3jrmdyCw	DTUP - Autismo: causas diagnóstico acompanhamento e vida adulta	no		1449669589	Rede Super de Televisão	UCFl00VTEDEA0cHCoMQ7CuZg	People & Blogs	22925	628	12	0.019108280254777	0
DCkKOZP6qZ4	ROTINA DE UMA VAQUEIRA PARTE 1	no		1482954806	Alessandro dutra do nascimento	UCoB_4Ec1pWpcf9mhyPfyvlw	Film & Animation	23616166	62877	26268	0.41776802328355	0	1864
KZx4TBgACL4	Autismo - Brincadeiras divertidas e educativas para crianças autistas // Viver Bem	no		1503692037	Unimed Fortaleza	UCUtDAMp91VCfHTZ9_ypKRPA	People & Blogs	245944	9758	207	0.021213363394138	0	100
Jad1CcvtM9Y	Os MELHORES ALIMENTOS para pessoas com AUTSMO	no		1569077229	Juntando as Peças do Autismo	UCf9lX9Vc4CWBUKQxVfZ6MtQ	Science & Technology	1691	239	3	0.01255230125523	0	13
RpsFY4kOp5c	Todo Seu - Conversa sobre Autismo e Síndrome de Asperger (06/11/14)	no		1415369506	Todo Seu	UCW4t6ozY9VDVeN_GHK260BQ	Entertainment	97347	1842	75	0.04071661237785	0	146
4rP-tzomiWA	PROBIOTICOS E PREBIOTICOS: Benefícios aos Autistas	no		1566648001	Juntando as Peças do Autismo	UCf9lX9Vc4CWBUKQxVfZ6MtQ	Science & Technology	790	72	0	0	0	6
aYM08A1z4CA	Haemophilus influenzae - Microbiologia	no		1529176500	Net Didata	UCXQHQFA87heyfElr-XajQPg	Education	3635	97	9	0.092783505154639	0	8
nveQFMDtC1g	4 Crenças para superar o luto no Autismo	no		1548196009	Juntando as Peças do Autismo	UCf9lX9Vc4CWBUKQxVfZ6MtQ	People & Blogs	853	100	0	0	0	6
cBENTxbBt40	AUTISMO LEVE - 7 ERROS NO DIAGNÓSTICO E TRATAMENTO I MARIA CLAUDIA BRITO	no		1533489974	Dra Maria Claudia Brito	UCFbx6QBTcDI6toOnO-EyajQ	People & Blogs	231441	12300	167	0.013577235772358	0	542
MjavUHYPr8U	Gado Nelore - Desembarcando Marcando Vacinando e Colocando Brinco - Irmãos Mach´s	no		1550491202	Irmãos Mach’s	UCtEEov46xWiYPdcJg-frWtg	Pets & Animals	1533907	11470	2387	0.20810810810811	0
7j94SZumBlU	Terapia Comportamental - 3 Dicas para Birra!	no		1529596206	Mayra Gaiato	UC42k7FI53tnSSIjgzW-rbLA	Education	115227	7964	94	0.011803114013059	0	180
0ZGEeQ_Mvu4	Atividade para crianças com autismo - aprendendo cores e formas	no		1513368380	Super Spectro	UC2pQFYIrk5mg9x-LRM9TzYw	Education	24949	379	17	0.044854881266491	0	1
pj9jBxK1kt8	3 Dicas para NÃO PERDER A LINHA | Alimentação Saudável em Eventos Sociais	no		1563019206	Juntando as Peças do Autismo	UCf9lX9Vc4CWBUKQxVfZ6MtQ	People & Blogs	192	19	0	0	0	1
x6R4_FOR1pM	COMO LIDAR COM BIRRAS E CRISES DA CRIANÇA AUTISTA | Lagarta Vira Pupa	no		1505173048	Andréa Werner	UC3lP5c55UE0ozG-uN0uBsXg	People & Blogs	373097	19757	283	0.014324037050159	0
iMsO7tn9tdc	AUTISMO - APRENDER A FALAR!	no		1537279205	Mayra Gaiato	UC42k7FI53tnSSIjgzW-rbLA	Education	48308	4302	22	0.0051139005113901	0	159
4eVB3_p_G_c	CRITICAL VACCINE STUDIES - POR QUE OS MÉDICOS NÃO ESTÃO TOMANDO VACINAS? (DIA 01)	no		1560216959	Qvida Boa	UCJIKKHplhnzcDmpztqUO7nA	People & Blogs	1402	223	8	0.035874439461883	0	58
LwoX9v88v1E	LISTA NEGRA de Alimentos Vilões | Para pessoas no Espectro Autista	no		1562414402	Juntando as Peças do Autismo	UCf9lX9Vc4CWBUKQxVfZ6MtQ	People & Blogs	5431	436	8	0.018348623853211	0	23
4AO_UAbom8g	MATÉRIA ESPECIAL SOBRE AUTISMO	no		1459527398	SBT Nova Mutum	UCV5oxb6HtQR-ZptUGtnoPZA	News & Politics	91238	2582	47	0.018202943454686	0	130
Pk1Z3bmIrRw	Este Orgão Pode PIORAR O AUTISMO | Relação Intestino e Cérebro	no		1565438404	Juntando as Peças do Autismo	UCf9lX9Vc4CWBUKQxVfZ6MtQ	People & Blogs	452	42	0	0	0	4
DHAvrlM7ObA	Autismo - Olhar Quando Chamado - Como Fazer?	no		1536847201	Mayra Gaiato	UC42k7FI53tnSSIjgzW-rbLA	Education	35170	3199	19	0.0059393560487652	0	95
PcC__PsQwsw	Porque NÃO DAR LEITE de vaca para um Autista	no		1553947203	Juntando as Peças do Autismo	UCf9lX9Vc4CWBUKQxVfZ6MtQ	People & Blogs	4226	263	8	0.03041825095057	0	28
xC2C9WTvmfY	Autismo: Os desafios da família e da escola	no		1460138810	NDTV Record TV Itajaí	UCL5NH3xftKuwmPbDwkZ-RUw	People & Blogs	113491	1353	63	0.046563192904656	0	66
VJEusa5fBig	Autismo - Como NÃO brincar com uma Criança com Autismo	no		1542718853	Mayra Gaiato	UC42k7FI53tnSSIjgzW-rbLA	Education	132307	12201	71	0.0058191951479387	0	207
D4StEQbBeEc	10 PRIMEIROS SINAIS de AUTISMO em BEBÊS até 2 ANOS	no		1548679869	Dra Maria Claudia Brito	UCFbx6QBTcDI6toOnO-EyajQ	People & Blogs	239210	6903	136	0.019701579023613	0	291
wSnyktkxN5I	Diagnóstico Médico de Autismo	no		1567893605	Felippe Vanessa	UC5ACo310tjp353abzLc6sVQ	People & Blogs	6883	1000	2	0.002	0	244
c_taAGvTz7Q	BENEFÍCIOS DA EQUOTERAPIA - AUTISMO	no		1430779751	MMarchadorTV	UCjFAEaZfULixCSOCIvY9qNw	Pets & Animals	12520	240	7	0.029166666666667	0	6
rLe6eGHnpLI	AUTISMO LEVE ou SUSPEITA: DICAS PRÁTICAS I MARIA CLAUDIA BRITO	no		1534107604	Dra Maria Claudia Brito	UCFbx6QBTcDI6toOnO-EyajQ	People & Blogs	139321	8101	73	0.0090112331810888	0	284
c_OhOyfE4rc	AUTISMO LEVE - desabafo de uma mãe de autista	no		1525978802	Mamãe Tagarela	UCz1xVDltULzUhZCJ1TkvnTQ	People & Blogs	51624	3377	71	0.021024578027835	0	368
pdEWHr0I3ZA	Saiba identificar os sintomas do Autismo [PE no Ar - 13 01 16]	no		1452805756	TV Clube PE	UCOFMoDHG-vKXs-f5vcG7JaQ	People & Blogs	321887	2167	133	0.0613751730503	0	84
Y9Fgywuls2s	Papo de Pai com Marcos Mion:​ Como foi descobrir que seu filho era autista?	no		1516297755	Papo de Pai	UC1r7Gt4v-OD8domIE0Vw2Zg	People & Blogs	361781	13141	303	0.02305760596606	0	330
LcMZunV9s88	5 DIREITOS DOS AUTISTAS - AUTISMO	no		1520794645	Meu Anjo Azul	UCoi5cG7JL_kZ-LGW6-PtZ_w	People & Blogs	125496	10324	149	0.0144323905463	0	845
TLfJbqjfuFk	Direitos dos Autistas. Collab com o advogado Thiago Müller	no		1526991736	Falando de Autismo com Ana Paula Müller	UCJl_ERzQBci1wgg3UdM1bVQ	Education	44010	2470	41	0.016599190283401	0	310
ySoNhvSXhNI	Coisas que todo autista gostaria que você soubesse	no		1458564227	Diário de um autista	UCbhT_vtlwr7X2wG6q_0mWVQ	People & Blogs	803579	94240	502	0.0053268251273345	0	3942
5PsE7C-vjoc	Autismo Infantil - Entrevista Especial Sobre Autismo Autismo part 5	no		1255926135	autismoinfantilvideo	UCNCRt4-OOYn34DOyYLCFWtQ	News & Politics	24615	59	2	0.033898305084746	0	0
A9M0uopFl64	NUNCA É TARDE - Pastor realiza simpósios sobre autismo em igrejas	no		1406768689	Rede Super de Televisão	UCIOosFcrtBhEwlVeGcYSqiQ	Entertainment	2279	49	2	0.040816326530612	0
ljXYATd79aY	Segundo advogados CDC precisa ser atualizado | JNT	no		1505232151	Revista Novo Tempo	UCcoPc-BqFPkVkkwyS35J-ng	News & Politics	38				0	0
iI6DbLAtI_M	Vacinar pra quê? Deus protege! (21.9.19)	no		1569080251	Resistência Contemporânea	UCebc-KBHO1FHPLC9HvTVZ3w	People & Blogs	356	93	2	0.021505376344086	0	16
93fAp_QENy8	Study finds no evidence of link between measles vaccine and autism	no		1551749006	CBS News	UC8p1vwvWtl6T73JiExfWs1g	News & Politics	11826	180	110	0.61111111111111	0	721
buGN-jnQUmk	Vacinando o Gado Nelore. No Sitio 3 Irmãos. Em Noroagro MT	no		1525910861	VINICIUS FLEX 10	UCJglPPxxQQtFg-78dIkRqNg	People & Blogs	560398	1285	275	0.21400778210117	0	24
y81edPE9t7A	AVISO - VEM AI A SEMANA CRITICAL VACCINE STUDIES - 7 DIAS DE PURA EMOÇÃO	no		1560116899	Qvida Boa	UCJIKKHplhnzcDmpztqUO7nA	People & Blogs	526	94	4	0.042553191489362	0	11
uyuba8Tip88	017 encaminhando o gado pra vacinação II	no		1349206234	Everton Ricardo Bootz	UCsrp4x3d515wkisfLk5NM-A	People & Blogs	54	0	0		0	0
GXmOoUgYbP4	Sarampo: Transmissão e Sintomas - Você Bonita (08/05/18)	no		1525804419	Você Bonita	UCxucJ9P3mLMneYypLZYn2uw	Howto & Style	24178	356	29	0.081460674157303	0	15
0zLg5Kp7gIk	Sintomas do Nascimento dos Dentes - Conversa de Mãe	no		1472565600	Macetes de Mãe	UCTrx5uG9vJjTLloAH8hE-pg	People & Blogs	438075	15429	454	0.029425108561799	0	679
GANKjaEsbuc	Aprenda a fazer arroz a parmegiana	no		1580929107	Ver Mais Londrina	UCGfBE94turq_hyKMxB-Dfrg	People & Blogs	204	2	0	0	0
QDN6XbxYJz8	Saiba sobre a calça jeans que promete vestir até 03 numerações	no		1580842731	Ver Mais Londrina	UCGfBE94turq_hyKMxB-Dfrg	People & Blogs	3199	14	0	0	0
CK_cRiQq1Q4	Entenda quais são os sintomas do sarampo e quem deve ser vacinado	no		1532345732	Jovem Pan News	UCP391YRAjSOdM_bwievgaZA	News & Politics	21477	303	19	0.062706270627063	0	10
eW3K_397gy0	Sobre a vacina de sarampo - Revista da Cidade (25/07/19)	no		1564074202	Revista da Cidade	UCun1gF57-Kv35uXZQ6Bn78A	Entertainment	2098	38	3	0.078947368421053	0	8
INFCldn3lhU	O QUE CAUSA MANCHAS VERMELHAS NO CORPO DE CRIANÇAS?	no		1513774801	DOUTOR AJUDA	UC1Nm7gQCcGvgLyVcGTXp-Ww	Education	241158	4445	228	0.051293588301462	0	75
Gc97RioqWlA	Sarampo - Conheça os sintomas e como se prevenir	no		1532124063	Sabin Medicina Diagnostica	UCsPBsWBocgY1BxKS0FVca0g	Entertainment	28946	222	9	0.040540540540541	0	4
MChC9U1HSFc	Bebê de sete meses é a primeira vítima fatal de sarampo em Manaus	no		1530852747	Jornal da Record	UCmpHPgeCBgvk_fDXZQKsnAA	News & Politics	894	10	1	0.1	0	0
ID4C-rpM_3U	Luta contra o sarampo	no		1563843685	TV BrasilGov	UCjaWLFTNqLkq3ZY2BJ4NYRg	News & Politics	2178				0	3
CsP_CrHzx6I	O que é coqueluche e quais seus sintomas? | Momento Papo de Mãe	no		1531303204	Papo de Mãe TV Cultura	UCQdOZmbeT9UoQy8G3zeNE-g	Entertainment	14331	295	10	0.033898305084746	0
am9XxFOMkt8	Dica de Saúde - Vacina Pentavalente	no		1343932464	TV UFMS	UC4p7d_1KehpvAb7_9-WlkdA	News & Politics	33964	260	42	0.16153846153846	0	15
_UJEBLg5CzQ	Sarampo: Sintomas e tratamento - Parte 2	no		1393355969	Unimed Fortaleza	UCUtDAMp91VCfHTZ9_ypKRPA	People & Blogs	38625	439	28	0.06378132118451	0	27
wYeh6kwacmM	Paciente com sintomas de sarampo foi isolado e exame deu negativo	no		1563535866	TVCidadeVerde	UCvJ1AGdJwRhGWM5n6D-SX9w	News & Politics	1245	11	2	0.18181818181818	0	0
vcus2G2H5To	Debate sobre o aumento dos casos de sarampo	no		1562800319	Jornal da Gazeta	UCNl_i-ggJbZNyOLlhE7yyhw	News & Politics	2954	70	5	0.071428571428571	0	12
geC-MuQw6KQ	Varfarina (Marevan)	no		1543414037	Manual Do Paciente	UC1M8HoHfvAfBpNnkGoMxX1w	People & Blogs	17847	1020	17	0.016666666666667	0	64
dsbT6GhpmNo	Começa campanha de vacinação contra sarampo no estado de São Paulo	no		1560188308	TV BrasilGov	UCjaWLFTNqLkq3ZY2BJ4NYRg	News & Politics	2050				0	1
hs3MsGWV0Ko	Idosos: Saúde cuidado e vitalidade | Ao Vivão #10	no		1531404002	Drauzio Varella	UC9zqTTVeClpqMQ5CLuJdWtw	Science & Technology	21419	1320	17	0.012878787878788	0	54
GCGRnNn8Fs8	Saiba tudo sobre rubéola	no		1570733532	TV Aparecida	UCfYrK5JU5EznsnK3wQE7iIg	Entertainment	4045	112	4	0.035714285714286	0	3
SQaqQpPlZAA	Hanseníase - Você Bonita (18/09/17)	no		1505757646	Você Bonita	UCxucJ9P3mLMneYypLZYn2uw	Howto & Style	60369	1087	58	0.053357865685373	0	95
pzxrYAC2NY4	Quem já teve sarampo pode pegar de novo? #TEAMTubers	no		1532062802	TEAMTubers	UCw8XEDi4jTvxcqHBeWEsu2w	Entertainment	541	18	0	0	0	8
1bf4bptbeRE	VACINA DE 1 ANO E 3 MESES - REAÇÃO | Vem com a Mãe	no		1542154107	VEM com a MÃE!	UCqGCcfns6j4zlcAODLOeMDg	People & Blogs	5966	129	14	0.10852713178295	0
XFJ8xgdfbew	Quem está amamentando pode tomar a vacina contra febre amarela?	no		1518813087	Ministério da Saúde	UC12zKGLhMhDeDidoctM6BrA	Nonprofits & Activism	5407	40	1	0.025	0	1
0uHsfcGY_tw	Reações às vacinas: alergia a ovo	no		1554907782	Ministério da Saúde	UC12zKGLhMhDeDidoctM6BrA	Nonprofits & Activism	1730	15	9	0.6	0	1
0FIfFX8aluU	Tudo o que você precisa saber sobre a tuberculose	no		1553006207	TV Aparecida	UCfYrK5JU5EznsnK3wQE7iIg	Entertainment	11495	449	11	0.024498886414254	0	26
-qU_pbPf9pc	Gestantes e pessoas com mais de 60 anos podem se vacinar?	no		1517493976	Ministério da Saúde	UC12zKGLhMhDeDidoctM6BrA	Nonprofits & Activism	977	14	1	0.071428571428571	0	0
aEXAUKB_XW0	Descubra como ler os rótulos dos produtos	no		1580928908	Ver Mais Londrina	UCGfBE94turq_hyKMxB-Dfrg	People & Blogs	108	7	0	0	0
vJ2nZXlV7vo	Tudo sobre a rubéola – o que é prevenção sintomas e evolução | Sua Saúde na Rede	no		1539692489	Sua Saúde na Rede	UC_er6_R1PKUCxc7QSXxIvzw	Education	18298	425	19	0.044705882352941	0
BNRjYt8XQ2o	Ver Mais Londrina Ao Vivo | Assista à íntegra de hoje e como fazer as receitas | 05/02/2020	no		1580928729	Ver Mais Londrina	UCGfBE94turq_hyKMxB-Dfrg	People & Blogs	266	13	1	0.076923076923077	0	0
PT7pYk6T-gU	Ver Mais Londrina Ao Vivo | Assista à íntegra de hoje e como fazer as receitas | 10/02/2020	no		1581360715	Ver Mais Londrina	UCGfBE94turq_hyKMxB-Dfrg	People & Blogs	118	9	1	0.11111111111111	0	0
1x6itgMtz6s	Clínica de Vacinas Unimed Londrina em 360º	no		1550077232	Unimed Londrina	UCegeG7JEKeXThmcZ8BjtvsQ	People & Blogs	12022	21	3	0.14285714285714	0	2
X7NryYy5z2o	VACINA DE 2 MESES #VLOG REAÇÕES DICAS CUIDADOS	no		1533330003	Priscila Faria	UCpvhFBKf_dacTd8NFRgcTxQ	People & Blogs	14338	400	19	0.0475	0	48
vsefrL9-_KI	Quadro juntas e vida real: namoro ou casamento a distância dá certo?	no		1581102045	Ver Mais Londrina	UCGfBE94turq_hyKMxB-Dfrg	People & Blogs	150	7	0	0	0
xb706wNjVnc	Pode passear com o cachorro antes de terminar a vacinação?	no		1547156600	Luiza Cervenka	UCRZqMrSXANo51Z3CJyOSbJg	Pets & Animals	5422	324	12	0.037037037037037	0	51
vOE7n23dOac	SÍFILIS CONGENITA DIAGNÓSTICO Fátima Rocha	no		1533322431	canal meu jeito de ser mãe	UC1xM1iuftFCqlZO-omXZesg	People & Blogs	17356	318	17	0.053459119496855	0	60
xqeOS1sKDKY	Os 10 Principais Sintomas da Sarampo	no		1531370026	Brazil Heath	UCAAqC3FgQfWxu_ui-1gynzQ	People & Blogs	49669	502	62	0.12350597609562	0	30
1DK0ybUcJxQ	Afinal Hepatite B tem cura ou não tem ? Por que sumiu e agora voltou ?	no		1547335097	Anna Krystina	UCIWKfj-9SxZetO6DVzDIlww	People & Blogs	5033	256	22	0.0859375	0	60
qkXTWFPtIHM	Hepatite B – Descubra quais são as causas sintomas e como prevenir.	no		1535022358	Brazil Heath	UCAAqC3FgQfWxu_ui-1gynzQ	People & Blogs	18946	282	32	0.11347517730496	0	5
1f8XkB5fkVc	Meningite Viral – O que é causas sintomas fatores de risco tratamentos e também como prevenir.	no		1534581330	Brazil Heath	UCAAqC3FgQfWxu_ui-1gynzQ	People & Blogs	2887	38	6	0.15789473684211	0	0
yd8j_ao9540	CNC EM AÇÃO | CNC participa do lançamento Doing Business	no		1576680631	Confederação Nacional do Comércio de Bens Serviços e Turismo	UC-4ddcVkyrXXbBqedYV4l9Q	Nonprofits & Activism	3803	1	0	0	0	0
L_-HSJrVWK4	Espaço Saúde - A Adolescência	no		1456343339	Confederação Nacional do Comércio de Bens Serviços e Turismo	UC-4ddcVkyrXXbBqedYV4l9Q	Nonprofits & Activism	12186	176	2	0.011363636363636	0	5
4HYYM5u95EQ	Como funcionam as vacinas	no		1516806226	DECO PROTESTE	UCOjnB2Ul08J7jM9npAvo6EA	News & Politics	13363	78	8	0.1025641025641	0	0
_Fy8bRPpPug	Fortaleça quem fortalece a sua empresa. Contribua com o seu sindicato.	no		1580481095	Confederação Nacional do Comércio de Bens Serviços e Turismo	UC-4ddcVkyrXXbBqedYV4l9Q	Nonprofits & Activism	3711	6	0	0	0	0
K0EZyQBnpLU	Atriz Cláudia Rodrigues fala sobre a luta contra a esclerose múltipla	no		1461776427	Hoje em Dia	UCN-opsqqDunWO6h5uCp9Y4g	Entertainment	328407	5396	211	0.039103039288362	0	281
Twl14tVz6BI	Segredo da Fortuna: ex-diarista vira empresária da construção civil	no		1469555866	Hoje em Dia	UCN-opsqqDunWO6h5uCp9Y4g	Entertainment	930814	15302	909	0.059403999477193	0	540
hmhDuYZtyYc	ÁREAS DE ATUAÇÃO FARMACÊUTICA: Indústria Farmacêutica	no		1424969910	Conselho Regional de Farmácia do Estado do Paraná	UCnvKlvhQsxsHW8bUaQ6MVZg	People & Blogs	5526	107	0	0	0	0
9vcEsEEhyLg	Imunização e administração de vacinas pelo farmacêutico	no		1500396534	Assistência Farmacêutica Avançada	UClbjlUoxxs-Lc7V7tNVa8CQ	People & Blogs	377	17	0	0	0	0
wLzI0U2hrtg	Conecta 19 - CNC	no		1576697773	Confederação Nacional do Comércio de Bens Serviços e Turismo	UC-4ddcVkyrXXbBqedYV4l9Q	Nonprofits & Activism	5468	6	0	0	0	0
5-a1rzPK-yw	CNC EM AÇÃO | Reunião de Diretoria Dezembro de 2019	no		1576764709	Confederação Nacional do Comércio de Bens Serviços e Turismo	UC-4ddcVkyrXXbBqedYV4l9Q	Nonprofits & Activism	9854	2	0	0	0	0
ycZ0FfReBlI	QUEM AJUDA O COMÉRCIO É RECONHECIDO	no		1576264503	Confederação Nacional do Comércio de Bens Serviços e Turismo	UC-4ddcVkyrXXbBqedYV4l9Q	Nonprofits & Activism	4944	0	0		0	0
3BtyWQryUBQ	Projeto Carreiras da Saúde | Imunização | Calendário Nacional de Vacinação 2017 | Profª. Fernanda	no		1485365679	Gran Cursos Online - Concursos Públicos	UC74icFVsxTFr2BW3Vm8n_iw	Education	43727	876	46	0.052511415525114	0	20
30Jzc1pu-Q4	O MAIOR ERRO DAS PESSOAS POBRES (3 Tapas de Realidade) | Oi Seiiti Arata 105	no		1521406800	Arata Academy	UCEdgNBcBybRtwv836C8El4g	Education	4997906	248732	7952	0.031970152614059	0	6822
O-EkK7P04Ag	#VacinarÉProteger - Lendas e mitos do Brasil	no		1505847696	Ministério da Saúde	UC12zKGLhMhDeDidoctM6BrA	Nonprofits & Activism	1574	25	4	0.16	0	0
0UjGi_3Q25k	Profissão Repórter 15/09/2015 Idosos (Alzheimer)	no		1442432632	Mercenarios	UCaNOyWyEVojnz4AolKeDFFA	Entertainment	613107	8446	331	0.039190149183045	0	626
4E1wHd4txLM	Vacina: saúde direito e cidadania	no		1532443264	Canal IOC	UCCgQHdB2fjuHB9a36UnfCKQ	Science & Technology	7520				0
fk5pWfmgXaw	Jovens e adolescentes precisam de vacinar contra HPV e Meningite	no		1521153517	Ministério da Saúde	UC12zKGLhMhDeDidoctM6BrA	Nonprofits & Activism	23544	145	6	0.041379310344828	0	3
JvKRv4B6waY	Importância da vacinação - Mulheres (12/07/2018)	no		1531428902	Mulheres	UCDtVoSwSwQgwhcC89Nlz5Vg	Entertainment	3069	56	5	0.089285714285714	0	4
ALGXaz3Ew24	Mitos e Verdades da Vacinação - SuperPoderosas 23/08/2018	no		1535048620	SuperPoderosas Band	UC8Igvj1lmVd752mKI0Rk_eQ	People & Blogs	103	5	0	0	0	0
3gxq9wa_0kg	Microbiologia e Imunologia - Aula 09 - Vacinas	no		1524773778	UNIVESP	UCBL2tfrwhEhX52Dze_aO3zA	Education	4564	123	2	0.016260162601626	0	0
HYKmOMZJWd4	Este Teste Lendário Revelará a Verdade sobre Sua Personalidade	no		1512086309	INCRÍVEL	UCIQPHl1WKKTt9KkWyo_JNig	People & Blogs	3139238	130911	17433	0.13316680798405	0	11198
vBGTQYphLHs	MITOS X VERDADES | Tire suas dúvidas sobre vacinação agora!	no		1536707027	Beep Saúde	UCzzv3f3UIhYZlIeuOl2QH9Q	Science & Technology	4166	48	17	0.35416666666667	0	5
K_IOwz8GasE	Surto Epidemia Pandemia e Endemia - Prof. Paulo Jubilut	no		1351137822	Biologia Total com Prof. Jubilut	UCG-eghyORxNrzSG8FkAWKyw	Education	497572	15598	165	0.010578279266573	0	392
ZvsPo8Am4Cs	Webaula - Vacina BCG ID	no		1528829269	Centro de Telessaúde HC-UFMG	UCnyFZr3wJBAJRjcqr_Q5Gug	Education	6252	139	10	0.071942446043165	0	4
3PpdZNOqM7k	Mitos sobre a vacinação - Mulheres (01/10/2018)	no		1538427145	Mulheres	UCDtVoSwSwQgwhcC89Nlz5Vg	Entertainment	961	40	1	0.025	0	2
h7g3SWSpm_4	Diabetes: Não Ignore Estes Primeiros Sintomas	no		1521239329	INCRÍVEL	UCIQPHl1WKKTt9KkWyo_JNig	People & Blogs	1352888	46396	1429	0.030800068971463	0	2001
WwvRVxzcAXk	Vacinação de adultos está abaixo da meta do Ministério da Saúde	no		1531955819	TV Canção Nova	UCVrKQMmA2ew9LFzeIDaOFgw	Entertainment	2076	64	5	0.078125	0	0
0DuHI0E6Bc4	#6 Qual a importância da Vacinação Infantil?	no		1533155035	Ministério da Saúde	UC12zKGLhMhDeDidoctM6BrA	Nonprofits & Activism	13382	147	5	0.034013605442177	0	2
TFAhiQSZLRg	Higiene íntima feminina e prevenção de doenças infecciosas - Mulheres (11/06/18)	no		1528752443	Mulheres	UCDtVoSwSwQgwhcC89Nlz5Vg	Entertainment	6657444	162657	6494	0.039924503710261	0	3205
IcyZC34q_qU	Entrevista de estágio com Roberto Justus	no		1339255418	ThePetroWorld	UCo8W6UskksVPEfNj09a9dMA	Science & Technology	1739733	22602	1014	0.044863286434829	0	1619
u6Sb4TtFp5E	Plantão X - Vetores e Suas Doenças	no		1467747929	Canal ProjetoX	UCJXAScTUxxfPzwLzZc3VUHA	Education	72673	2975	59	0.019831932773109	0	64
8t9MDPsCHh4	🔴 Quais doenças geram direito à aposentadoria por invalidez?	no		1467858100	Saber a Lei	UCqnZW-G3y8afNMyYb821u6g	Education	3590542	112319	3811	0.033930145389471	0	3283
0oPBb0RPer0	ACORDANDO MUITO À NOITE PARA URINAR?	no		1529931788	Dra. Carla Frohmuller	UC3MmhFxndlz10oOgXvuvLPQ	Education	1344584	48871	1802	0.036872582922388	0	182
9oF5tcWA2rA	5 dicas para conquistar o que quiser! - Georg Frey - Mentor: georg@uach.com.br / (81) 99971-9876.	no		1478028313	UACH	UC-TJtIntyZTj34lwLdSo2xQ	People & Blogs	2072304	82967	3180	0.038328492051056	0	2494
_7weBsPCBj0	Como o câncer se desenvolve	no		1501088235	Pedro Cunha	UCw3HLkyWjI3tD1RQTGEe8LA	People & Blogs	875414	32171	595	0.018494917783097	0	1209
gwUx552ZYRA	VICIADOS EM CRACK: TUDO SOBRE A SUBSTÂNCIA E SEUS EFEITOS	no		1496844005	DOUTOR AJUDA	UC1Nm7gQCcGvgLyVcGTXp-Ww	Education	702431	14984	502	0.033502402562734	0	1277
odimsr2jEFU	Psicologia Pediátrica - Humanização e Vacinação	no		1542297366	Carol Lima	UCCq8mh725qRQn8g2_PvibpA	People & Blogs	77	1	0	0	0	0
qC3jCyGPDek	Vacina - Trabalho de Biologia @Bio	no		1415321660	Brunna Cristina	UCijEMORybIdM0CWLJaHjQGA	People & Blogs	38	1	0	0	0	0
i1Vx3Mrwbzk	Conheça 8 mentiras sobre a vacinação	no		1565645861	Ministério da Saúde	UC12zKGLhMhDeDidoctM6BrA	Nonprofits & Activism	900	45	1	0.022222222222222	0	1
iz1oqofBo_o	COMIDA DE GELATINA vs COMIDA DE VERDADE!! (COM MINHOCA COMESTÍVEL)	no		1520632802	LUCCAS NETO - LUCCAS TOON	UC_gV70G_Y51LTa3qhu8KiEA	People & Blogs	18397901	436486	26483	0.060673194558359	0
dIyt7dBmsTs	#FalaGotinha - Vacinas para adultos de 20 a 59	no		1546025302	Ministério da Saúde	UC12zKGLhMhDeDidoctM6BrA	Nonprofits & Activism	4036	71	0	0	0	1
II7rjc8Z0S4	Desenvolvimento de vacinas	no		1303753565	Jornalismo TV Cultura	UCXdXYG8dUmEv6jhEji_lSHg	News & Politics	869	8	0	0	0	0
ObvVCIwOYi8	Viva Mais SUS - Sífilis	no		1528230813	Ministério da Saúde	UC12zKGLhMhDeDidoctM6BrA	Nonprofits & Activism	7933	126	1	0.0079365079365079	0	2
9rS8lL3VEfk	Mentira 7 - Conheça 8 mentiras sobre a vacinação	no		1565650028	Ministério da Saúde	UC12zKGLhMhDeDidoctM6BrA	Nonprofits & Activism	360	9	0	0	0	1
pXKk0H5KAeM	Infecção hospitalar: higiene e cuidado evitam problemas	no		1487864439	Ministério da Saúde	UC12zKGLhMhDeDidoctM6BrA	Nonprofits & Activism	33754	565	26	0.046017699115044	0	1
YkLV2CFxPBs	Como antecipar o cio das vacas - Boi Saúde	no		1421717309	Boi Saúde	UCB9iWAdLYM9GzeKOaOBYH2Q	People & Blogs	121802	2429	88	0.036228900782215	0	115
ybAZ61N9PKw	5 alimentos que você deve parar de comer se tem diabetes!	no		1549215478	Dr. Marco Menelau	UCGbDaS58FGh45Oq4N-Qfhdw	Science & Technology	2969986	231874	5878	0.025349974555146	0	4032
BOIjvzyoTxY	Mentira 1 - Conheça 8 mentiras sobre a vacinação	no		1565646462	Ministério da Saúde	UC12zKGLhMhDeDidoctM6BrA	Nonprofits & Activism	465	29	5	0.17241379310345	0	1
qXfFSVPjtb0	Quais os riscos da vacina contra a Febre Amarela	no		1520622385	Programa Ver Mais Blumenau	UC6weCvYc5fRFMT0-BgYJ40Q	People & Blogs	1204	10	2	0.2	0	0
_dKwq77_U9g	Vacinação de gado	no		1421692906	unespvideos	UCwHCkGOaMvG2kz7b-jhi2qA	Education	62872	260	55	0.21153846153846	0	1
Kk3qn2g1z0c	Mentira 5 - Conheça 8 mentiras sobre a vacinação	no		1565649704	Ministério da Saúde	UC12zKGLhMhDeDidoctM6BrA	Nonprofits & Activism	242	6	0	0	0	0
bccARjBNCYk	Mentira 2 - Conheça 8 mentiras sobre a vacinação	no		1565648767	Ministério da Saúde	UC12zKGLhMhDeDidoctM6BrA	Nonprofits & Activism	425	24	0	0	0	0
ANfpF0pNob4	Ministério Zoe - Aquieta Minh alma - Web Clip	no		1483300755	Ministério Zoe Vida de Deus	UCa-AC7YhCP5u5yO5aNjKjoA	Music	298370721	1879298	140126	0.07456294850524	0	82312
jjH5KfyI9lc	Previne Brasil: novo modelo de financiamento do SUS	no		1580923798	Ministério da Saúde	UC12zKGLhMhDeDidoctM6BrA	Nonprofits & Activism	1304	33	0	0	0	1
kNigvm6LxGM	Mentira 4 - Conheça 8 mentiras sobre a vacinação	no		1565649395	Ministério da Saúde	UC12zKGLhMhDeDidoctM6BrA	Nonprofits & Activism	304	9	2	0.22222222222222	0	3
vdD8IfWibQ0	TIPOS DE BEBÊS TOMANDO VACINA - VACINEI A DOUTORA	no		1480161675	Emilly Loise	UCQ1LWE9p0i3HxIpDZjiOKjg	Entertainment	6572438	35507	6274	0.17669755259526	0
tpoHZYPCyVA	Idosa contrai pneumonia após não tomar vacina da gripe	no		1530720425	Hoje em Dia	UCN-opsqqDunWO6h5uCp9Y4g	Entertainment	3482	88	13	0.14772727272727	0	27
J-ve8BkWHX4	La verita su vaccini antiparassitari e cibo per cani raccontata dal Dott. Prota	no		1566637209	Fashion Dog Italia	UCnQeN_JtknE5o6NHZeOMpXQ	Pets & Animals	849	38	5	0.13157894736842	0	6
sqUEQfLj0HQ	Previna-se contra o câncer	no		1580505867	Ministério da Saúde	UC12zKGLhMhDeDidoctM6BrA	Nonprofits & Activism	475	25	1	0.04	0	2
S3uLGKDPY20	Mentira 3 - Conheça 8 mentiras sobre a vacinação	no		1565649099	Ministério da Saúde	UC12zKGLhMhDeDidoctM6BrA	Nonprofits & Activism	348	4	1	0.25	0	5
IH9NOGjh8mA	Ci sono mercurio e metalli pesanti nei vaccini? - Comprendere i vaccini (video 7)	no		1506332498	La Chimica per Tutti!	UCN_Yp-5LABpTC1qLls2PXAA	Education	2233	84	35	0.41666666666667	0	185
ebG36xtK87A	Marília Mendonça - BEM PIOR QUE EU - (Todos Os Cantos)	no		1536328936	Marília Mendonça	UCwfEOn0O1DWcyTgzVVu28ig	Music	406957414	1489659	80161	0.053811644141377	0	20833
eWZU86JsEmg	Dario Miedico vs Fabrizio Pregliasco - L obbligo vaccinale | Sottosopra 2019 › 2.1	no		1553357749	Sottosopra	UCL3HlT99aQ1004ojA7u6ETQ	Education	616	22	0	0	0	4
s-oJ-XDhbfk	MENINGITE SAIBA MAIS SOBRE A DOENÇA	no		1279417663	Leonardo Paiva	UClylplTLDuf46pVapBO12_w	People & Blogs	19466	107	5	0.046728971962617	0	5
ET734fcYkwo	Ministério da Saúde atualiza situação sobre o novo coronavírus - 04.02.2020	no		1580849078	Ministério da Saúde	UC12zKGLhMhDeDidoctM6BrA	Nonprofits & Activism	1943	115	12	0.10434782608696	0	22
xJR2WjKLJzw	Evite o Alzheimer: apenas 1 exercício todas as noites antes de dormir	no		1527116604	Cura pela Natureza - As melhores dicas de saúde!	UCYSslASzgHQ_F_vuTsmmi-g	People & Blogs	1672835	58827	2076	0.035289917894844	0	469
1Dc9R1gU6RQ	185(5) Autismo e Vacinas Um Tributo ao Dr James Jeffrey Bradstreet	no		1527204702	Bruno S. Alves	UCquENngBYGYpHYtN0OVYLKQ	People & Blogs	570	49	3	0.061224489795918	0	3
z0bnfLO0SRc	#TudoTemSeuTempo - Prevenção da gravidez na adolescência	no		1580760708	Ministério da Saúde	UC12zKGLhMhDeDidoctM6BrA	Nonprofits & Activism	1028725	124	8	0.064516129032258	0	13
TBrMS7mgOR8	Meu Médico me Alertou! Os Sinais que Seu FÍGADO Está Doente Estão Na Sua Frente	no		1553808600	Só Dicas Naturais	UCr-BdJEeyDNlPodHF1pUKOg	People & Blogs	3097224	157576	3652	0.023176118190587	0	5505
GRgjv2RCk1s	Plicoma no Ânus. O que é isto?	no		1508636089	Dr. Fernando Lemos	UChXNyp6dL_aY_3qwVgDd-EQ	People & Blogs	4013054	173478	4176	0.02407221664995	0	2626
mW2p8lR9tZw	12 sinais de que sua tireoide não está funcionando como deveria	no		1540999285	Cura pela Natureza - As melhores dicas de saúde!	UCYSslASzgHQ_F_vuTsmmi-g	People & Blogs	1739681	46664	1935	0.041466655237442	0	453
sUGeHHOEqmQ	Olavo de Carvalho - Fake news ou verdade dolorida?	no		1540416671	Olavo de Carvalho	UC6RQhzm93SterWntL7GzqYQ	Comedy	224450	36369	292	0.0080288157496769	0	1577
WD3rOXk7xHI	HOUSE TEMPORADA 1 EP 2 - VACINA....	no		1495640333	MELHORES CENAS DO CINEMA	UC9z9JemVpHB7BJtXjESAsOw	People & Blogs	19226	268	4	0.014925373134328	0	4
EjQRedV5KF4	Diabetes: Conhecido como Assassino Silencioso - Não Ignore Estes Primeiros Sintomas	no		1522547287	ISTO É INTERESSANTE	UCO3YT7cu0cxd8gSQ6nCf0qg	People & Blogs	1471557	40166	1412	0.035154110441667	0
Nq01IKRGNMQ	Dona do Pedaço - Descoberta ABALA Rock ao Descobrir GRANDE FARSA de Fabiana	no		1565108147	Aponta Vídeos	UC5KkuUqkQBF8yD3xqbLMigA	Entertainment	1025907	68034	1308	0.019225681277009	0	557
r_8ufdEh4H4	JA FIZ TATUAGEM E AGORA NÃO VOU PRO CÉU? EXISTE BLASFÊMIA EM PENSAMENTO??	no		1531920544	Igreja Santidade e Arrependimento	UCcs0knrjjReJHuF5lsBBbiw	Entertainment	39333	3241	44	0.013576056772601	0	225
gGKvT2oTWGM	MOVIMENTO ANTIVACINA E SEU IMPACTO NO PÚBLICO INFANTO-JUVENIL	no		1568431062	Rayza Cavalcanti	UCNbBZt5B3cSrqjmYSecmU3g	People & Blogs	12	1	0	0	0	0
PUavUeGCTCo	LEUCEMIA: 15 SINAIS QUE VOCÊ NÃO PODE IGNORAR!	no		1504044001	Remédios Caseiros Marcia	UCf4kyk1iMd03noNbDU2nNOg	People & Blogs	538611	9367	397	0.042382833351126	0	235
sK00Fv_bxco	Lançamento da Campanha Nacional de Vacinação contra o Sarampo	no		1580928215	Ministério da Saúde	UC12zKGLhMhDeDidoctM6BrA	Nonprofits & Activism	46	1	1	1	0	0
rVjsyWB0MPM	C è mercurio nei vaccini? Ne parla Stefano Montanari	no		1496309245	La Verità sui Vaccini	UCvm2Fxo8EavRB59AVNF7F2g	People & Blogs	11376	296	18	0.060810810810811	0	81
hAerhHh3XJo	I vaccini causano autismo? Ci sono troppi metalli pesanti al loro interno?	no		1553679110	Fondazione Umberto Veronesi Channel	UCCSQ6Dq4FDyN6rgWCt_uurQ	Nonprofits & Activism	586	10	14	1.4	0	101
MCCMLxPrA2k	Toxicologia dos metais pesados Chumbo e Mercúrio	no		1432425534	Marlithon Oliveira	UCzp_5fGv8jy8uf_Jl46nR2A	Film & Animation	37339	555	10	0.018018018018018	0	17
0lgRM3UAXJs	Einstein Confirmado: Buracos Negros são Mesmo Buracos no Universo | Fora da Caixa	no		1496437201	Canal do Schwarza	UCWq1xltHB2fDe6YkYoOrryg	Entertainment	297271	30934	594	0.019202172366975	0	1025
yFC5TXyJQ7I	7 doenças que incrivelmente dão superpoderes	no		1521066601	Fatos Desconhecidos	UCbAiIkPobUFy71zlmwVw3jw	Entertainment	952069	74826	926	0.012375377542565	0	5013
uKxMk0-YU6c	Descubra como é feita a vacina contra a gripe do Instituto Butantan	no		1460759255	Canal da Saúde	UCpZO2Fi6cd_PXZNH0yeGjSw	News & Politics	25836	251	34	0.13545816733068	0	33
Eo02PzGQLH4	NUNCA COLOQUE MERCÚRIO NO SAL OU ISSO PODE ACONTECER!	no		1510092139	Área Secreta	UCcFgREmujdPHvA7I_VOmgIA	Entertainment	3010322	262325	17906	0.068258839226151	0	8033
PyhNfQxF5lI	VASSOURAS DE PÉ: Fenômeno seria Causado por Bug na Rotação da Terra?	no		1581282002	Canal do Schwarza	UCWq1xltHB2fDe6YkYoOrryg	Entertainment	41136	8598	70	0.0081414282391254	0	369
5s2OuChi-Ek	Conheça o Verdadeiro Motivo da NASA não Voltar mais à Lua | Lenda ou Fato?	no		1495116000	Canal do Schwarza	UCWq1xltHB2fDe6YkYoOrryg	Entertainment	5547371	137203	8389	0.061142977923223	0	7840
bvXwPiro8sY	GOOGLE Desenvolve a Réplica mais Completa de um Cérebro!	no		1580948874	Canal do Schwarza	UCWq1xltHB2fDe6YkYoOrryg	Entertainment	32518	5775	66	0.011428571428571	0	229
e_7oqIduYsg	Criaram o Primeiro Robô VIVO do Mundo Usando Células de Sapo e Inteligência Artificial!	no		1579732201	Canal do Schwarza	UCWq1xltHB2fDe6YkYoOrryg	Entertainment	75301	12207	79	0.0064716965675432	0	676
6BgYYh-6i2A	Estrela Vira Buraco Negro sem Explodir - Os Mistérios de Júpiter | 5 Vídeos Sobre Ciência	no		1496082922	Canal do Schwarza	UCWq1xltHB2fDe6YkYoOrryg	Entertainment	113631	12563	101	0.008039481015681	0	407
ednl5kbHCVQ	Qual a Relação do Tomate e o Magnetismo? -- Você não tem Apenas 5 Sentidos Veja quais são os outros	no		1580079623	Canal do Schwarza	UCWq1xltHB2fDe6YkYoOrryg	Entertainment	19928	3639	40	0.010992030777686	0	68
o1igEDbmZOc	Construíram um ACELERADOR DE PARTÍCULAS do Tamanho de um Chip de Computador!	no		1579300200	Canal do Schwarza	UCWq1xltHB2fDe6YkYoOrryg	Entertainment	23348	4521	20	0.004423800044238	0	138
I7Tme3TYb0Y	Quinta Força da Natureza? - Experimento do CERN Caça Misteriosa Partícula X17	no		1579127241	Canal do Schwarza	UCWq1xltHB2fDe6YkYoOrryg	Entertainment	28103	5017	37	0.0073749252541359	0	204
0ts-OuNGZK8	Como Seria o Céu Iluminado por Uma Supernova? - O que é a Lua Negra? | 5 Videos Absurdos	no		1475503201	Canal do Schwarza	UCWq1xltHB2fDe6YkYoOrryg	Entertainment	137203	12688	82	0.0064627994955864	0	357
WSKo7MtZT3w	Antivacina - Opinião Minas - parte 1	no		1425403124	Opinião Minas	UC0YtWlcM-9XEt8NTXI1HAOw	Entertainment	321	6	1	0.16666666666667	0
ToeUcsCh_xE	Um Novo (e Estranho) Objeto é Encontrado no Centro da Galáxia	no		1579816804	Canal do Schwarza	UCWq1xltHB2fDe6YkYoOrryg	Entertainment	53318	7979	93	0.011655595939341	0	242
IlEovwrFLGQ	ANTIMATÉRIA (Por Que Você Deveria Ficar Longe de Bananas)	no		1523628004	Ciência Todo Dia	UCn9Erjy00mpnWeLnRqhsA1g	Science & Technology	840868	104986	773	0.0073628864801021	0	2512
EZ-02iTzlEc	Autismo leve - História da Bebella - bate papo com Bianca Bittencourt	no		1501156891	Aline Vicente	UCA1nC2t2zfzBOySscmpIzGQ	People & Blogs	147230	9770	106	0.010849539406346	0
C1JB8-9TC_Y	Relatividade Confirmada Outra Vez - A Terra Durante um Ano Netuniano | 5 Vídeos Sobre Ciência	no		1497301200	Canal do Schwarza	UCWq1xltHB2fDe6YkYoOrryg	Entertainment	84895	11574	92	0.0079488508726456	0	329
BJSpxZL52q8	O Dinossauro Mais Bem Conservado do Mundo - Como os Fósseis se Formam? | PoligoPocket	no		1495029604	Canal do Schwarza	UCWq1xltHB2fDe6YkYoOrryg	Entertainment	110146	11331	87	0.007678051363516	0	340
muTlkLU2Dak	CORONAVÍRUS: OMS Admite Erro em Relatório e Eleva Vírus Para Alto Risco Global	no		1580162825	Canal do Schwarza	UCWq1xltHB2fDe6YkYoOrryg	Entertainment	221181	26326	298	0.011319607992099	0	2897
YHH2RCttiKs	Físico Diz que Buracos Negros irão Destruir o Universo | PoligoPocket	no		1494943205	Canal do Schwarza	UCWq1xltHB2fDe6YkYoOrryg	Entertainment	52377	7993	51	0.0063805830101339	0	446
cIrDqCRR_sM	Novos Dados da Juno Revelam: Júpiter é mais Complexo do que se Imaginava | LIVE	no		1495757901	Canal do Schwarza	UCWq1xltHB2fDe6YkYoOrryg	Entertainment	38771	3078	66	0.021442495126706	0	202
pqyEEOEy-rQ	Planeta Parecido com a Terra é Encontrado em Nosso Quintal | PoligoPocket	no		1496171062	Canal do Schwarza	UCWq1xltHB2fDe6YkYoOrryg	Entertainment	86982	11291	96	0.008502347002037	0	393
d4ZSDrwZECk	Veja os BURACOS NEGROS em Escala e se Sinta um Inseto | PoligoPocket	no		1479827896	Canal do Schwarza	UCWq1xltHB2fDe6YkYoOrryg	Entertainment	90611	12787	77	0.006021740830531	0	592
OdEZC1I5aHQ	Saúde: riscos de campanhas antivacinação e importância das vacinas	no		1497279287	Ulbra TV	UCpKbjgVXitTO7mIkalr4-kQ	News & Politics	411	10	3	0.3	0	1
RpGXRkXdHbA	Olho que Tudo Vê Surge No Céu do Reino Unido - Documento da NASA Confirma Nibiru? | Lenda ou Fato?	no		1494604022	Canal do Schwarza	UCWq1xltHB2fDe6YkYoOrryg	Entertainment	81177	8769	121	0.013798608735318	0	382
IJxnMlk4AvU	A Primeira Evidência de um OUTRO UNIVERSO Além do Nosso? | PoligoPocket	no		1493822285	Canal do Schwarza	UCWq1xltHB2fDe6YkYoOrryg	Entertainment	131029	16648	98	0.0058865929841422	0	543
QWkdWgviVl8	Minha Visão de Deus | Fora da Caixa	no		1481288404	Canal do Schwarza	UCWq1xltHB2fDe6YkYoOrryg	Entertainment	160230	22721	513	0.022578231591919	0	2392
B72hElBk9BA	O Brasil Ainda tem Solução? | Fora da Caixa	no		1495232907	Canal do Schwarza	UCWq1xltHB2fDe6YkYoOrryg	Entertainment	61205	10462	159	0.015197858917989	0	936
saIXYZKXZGY	Estudo Confirma: Júpiter é o Planeta mais Antigo do Sistema Solar e Ajudou a Molda-lo | PoligoPocket	no		1497474002	Canal do Schwarza	UCWq1xltHB2fDe6YkYoOrryg	Entertainment	66381	8942	52	0.0058152538581973	0	322
oJLDw5xc98E	Experimento Sugere que a Realidade NÃO Existe se não for Observada | AstroPocket	no		1534294356	Canal do Schwarza	UCWq1xltHB2fDe6YkYoOrryg	Entertainment	425954	46455	908	0.019545797007857	0	2495
fI7idPHcr1I	Novidades Sobre o Planeta 9 - Passeio em Plutão - A Menor Estrela | 5 Vídeos Sobre Ciência	no		1500333006	Canal do Schwarza	UCWq1xltHB2fDe6YkYoOrryg	Entertainment	75135	10617	88	0.008288593764717	0	393
w9cmAxJGK2s	Seu Cérebro é Confiável? Testes e Ilusões de Ótica Para Confundir sua Cabeça | PoligoPocket	no		1494338407	Canal do Schwarza	UCWq1xltHB2fDe6YkYoOrryg	Entertainment	35318	5588	55	0.0098425196850394	0	419
oWn9m_-w_tY	Seu Corpo no Espaço e Aquecimento Global | Primata Falante	no		1506697132	Primata Falante	UC876uazcW8p7wdl3JdbVIaA	Science & Technology	48609	6432	150	0.023320895522388	0	748
-vpdi-f12Ag	Polos de Júpiter São Diferentes de Tudo que já se Viu - Cometa Maior que o Sol? | 5 Vídeos Absurdos	no		1473084001	Canal do Schwarza	UCWq1xltHB2fDe6YkYoOrryg	Entertainment	144557	13271	70	0.0052746590309698	0	596
bTLxh2ZBGh4	Objeto Interestelar é uma Nave Alienígena? - Conversei Com um Astronauta! MOBFOG 2017 | AstroPocket	no		1513281603	Canal do Schwarza	UCWq1xltHB2fDe6YkYoOrryg	Entertainment	66642	7192	95	0.013209121245829	0	333
wb_TuGCTNyw	Segundo Cientista Os Humanos Serão Extintos em 100 Anos | PoligoPocket	no		1435068002	Canal do Schwarza	UCWq1xltHB2fDe6YkYoOrryg	Entertainment	157268	12026	147	0.012223515715949	0	944
xBi_J-Zo7Wg	Estrela da Megaestrutura Alienígena Mobiliza Cientistas no Mundo Todo | PoligoPocket	no		1495548025	Canal do Schwarza	UCWq1xltHB2fDe6YkYoOrryg	Entertainment	74273	9287	106	0.01141380424249	0	240
KhO1FEIQPRs	5 Motivos Para Acreditar em Vida Extraterrestre | PoligoPocket	no		1393423205	Canal do Schwarza	UCWq1xltHB2fDe6YkYoOrryg	Gaming	52290	6205	53	0.0085414987912973	0	191
9NObHIomn2w	Monarquia é a Solução? - Bate Papo Sobre Política com o Diplomata Rômulo Neves!	no		1495494855	Canal do Schwarza	UCWq1xltHB2fDe6YkYoOrryg	Entertainment	13255	1304	108	0.082822085889571	0	108
by9fjZpua9w	PIRÂMIDES NA AMAZÔNIA - O Curioso MISTÉRIOS	no		1511526812	O Curioso	UC-qeHsCIc4DiYhmPq7cmLkQ	Entertainment	57075	5392	120	0.022255192878338	0	270
7vjuJjO2Y-0	A Terrível Intoxicação Por Mercúrio ► Parte 1/3	no		1499277284	Detox e Saúde	UCaJqv_9-pPiWRCI33WQD9ZA	Sports	12826	301	13	0.043189368770764	0	94
oS4lSocn6HI	Teremos que Deixar a Terra num Prazo de 100 Anos? - Analise do OVNI Avistado na França - LIVE	no		1494372099	Canal do Schwarza	UCWq1xltHB2fDe6YkYoOrryg	Entertainment	29341	3286	52	0.015824710894705	0	143
gQTIC0vyBPo	🧬 H1N1: Drauzio Varella explica tudo sobre o vírus	no		1459994489	Portal Saúde Mais	UCSfmJw5USzP6Ca-uGPPsNRA	News & Politics	220281	2306	189	0.081960104076323	0	158
1BoGhWFJfjQ	O Efeito Overview: O Mundo em Perspectiva | Fora da Caixa	no		1488553052	Canal do Schwarza	UCWq1xltHB2fDe6YkYoOrryg	Entertainment	41474	8020	93	0.011596009975062	0	392
KqK9hVUQx1E	Descubra o Motivo de não Vermos Estrelas nas Fotos da NASA | PoligoPocket	no		1496264401	Canal do Schwarza	UCWq1xltHB2fDe6YkYoOrryg	Entertainment	81276	10323	179	0.017339920565727	0	689
uhdrg5kdk_A	Explicando a Dobra Espacial: Seria possível chegar até Marte em Minutos?	no		1496101870	Canal do Schwarza	UCWq1xltHB2fDe6YkYoOrryg	Entertainment	39318	3088	81	0.026230569948187	0	165
wfvXvAQoprA	Evacuação do Umbral e Nova Raça Humana ‹ PAVA RESPONDE ›	no		1520949605	Canal do Pava	UCnH3v7ENZKWTqATMGdpKxBQ	Howto & Style	109910	7366	198	0.026880260657073	0	652
It5cZY11p8Q	POVO ALIENADO VEJA COMO O MERCÚRIO UTILIZADO NAS VACINAS DANIFICA O SEU CÉREBRO	no		1465412492	HUMANÆ LIBERTAS	UC0bD2v2yi9WoiupiOMV951Q	Nonprofits & Activism	804				0
_hao2wf01MU	Brahma a divindade Extraterrestre	no		1523648597	E Se For VERDADE?	UCIsrnGY0LfR4OT_PkfzAIJA	Gaming	417356	9962	1074	0.10780967677173	0	538
dnN92K3rzAc	STF mantém Lula preso e deixa para julgar suspeição de Moro depois	no		1561505712	BBC News Brasil	UCthbIFAxbXTTQEC7EcQvP1Q	News & Politics	65982	3635	180	0.049518569463549	0	496
DN9U6lx66U0	Caixa-preta e disputa bilionária: o que está por trás da saída de Levy do BNDES	no		1560888641	BBC News Brasil	UCthbIFAxbXTTQEC7EcQvP1Q	News & Politics	58531	3744	236	0.063034188034188	0	543
jzFmY94WSkQ	Como a decisão de não vacinar seu filho afeta o grupo	no		1560950403	BBC News Brasil	UCthbIFAxbXTTQEC7EcQvP1Q	News & Politics	7756	929	31	0.033369214208827	0	147
CX34mU97u0M	Dono da Havan: Daqui a pouco estou vendendo produto do Véio da Havan	no		1561132865	BBC News Brasil	UCthbIFAxbXTTQEC7EcQvP1Q	News & Politics	37063	1810	885	0.48895027624309	0	918
8Wj_pkBuuns	Como disputa sobre Itaipu quase derrubou presidente paraguaio?	no		1564770391	BBC News Brasil	UCthbIFAxbXTTQEC7EcQvP1Q	News & Politics	60148	4872	218	0.044745484400657	0	861
SmMt2pXgnto	O MITO E O PERIGO DO MOVIMENTO ANTIVACINA | Natalia Pasternak	no		1573736942	Casa do Saber	UCtvvTFp0XANyllOdmzZr9VQ	Education	10811	1885	43	0.022811671087533	0	289
Px4okHZrn00	A trágica história do médico que descobriu que lavar as mãos salva vidas	no		1581013234	BBC News Brasil	UCthbIFAxbXTTQEC7EcQvP1Q	News & Politics	58691	7748	65	0.0083892617449664	0	476
n1xCk8T8E_M	Bolsonaro chega ao G20 e rebate fala de Merkel: ‘Temos muito a ensinar à Alemanha’	no		1561629674	BBC News Brasil	UCthbIFAxbXTTQEC7EcQvP1Q	News & Politics	129771	3753	434	0.11564082067679	0	2342
EZZQZnKQPa8	Liberação de saques do FGTS à vista? Bolsonaro diz que sim. Entenda o que está em jogo	no		1560462377	BBC News Brasil	UCthbIFAxbXTTQEC7EcQvP1Q	News & Politics	404591	12879	371	0.02880658436214	0	822
Be1fc6ao4mg	Amazônia vem do grego? A curiosa origem de 5 palavras gregas no português	no		1562101596	BBC News Brasil	UCthbIFAxbXTTQEC7EcQvP1Q	News & Politics	126822	13434	115	0.008560369212446	0	758
jwGQV1afA0I	Da cocaína ao acordo histórico do Mercosul: os “baixos e altos” da semana do Brasil no mundo	no		1561812954	BBC News Brasil	UCthbIFAxbXTTQEC7EcQvP1Q	News & Politics	28239	2982	238	0.07981220657277	0	521
W4qAqhB7v-o	PRIMEIRO DIA NA COREIA DO NORTE | Parte 1	no		1560432972	Mundo Sem Fim	UCOJNw9aHGRkYuIOqwU7yK-Q	Travel & Events	831777	31605	8018	0.25369403575384	0	9367
IEeVSaEXhew	Não é só Previdência! 4 grandes desafios de Bolsonaro na economia	no		1555691391	BBC News Brasil	UCthbIFAxbXTTQEC7EcQvP1Q	News & Politics	39914	4023	75	0.018642803877703	0	306
X-UneV6TBGE	Antivacina | Projeto Meme	no		1534899600	Canal Futura	UC2mmP8ysfyko40KSn90x6Og	Education	3716	218	13	0.059633027522936	0	17
uflBBRUJCfk	O que é mito e o que é verdade sobre o desmatamento no Brasil e na Europa	no		1566411210	BBC News Brasil	UCthbIFAxbXTTQEC7EcQvP1Q	News & Politics	150735	16058	1169	0.07279860505667	0	1815
lC7pqoCH69g	Entre Trump e Xi Jinping o que o Brasil de Bolsonaro quer alcançar no G-20 do Japão	no		1561570416	BBC News Brasil	UCthbIFAxbXTTQEC7EcQvP1Q	News & Politics	24770	1811	65	0.03589177250138	0	349
hN65iYFLZtM	O impressionante alerta de Bill Gates sobre a China	no		1579939260	Daniel Lopez	UCpLR-q8rFLe_rEAXf4PRxRg	Entertainment	255664	32154	448	0.013932947689246	0	1994
4HJQY7rz-3c	Você sabe o que é imunização de rebanho?	no		1555420577	Ministério da Saúde	UC12zKGLhMhDeDidoctM6BrA	Nonprofits & Activism	1056	41	1	0.024390243902439	0	5
ZkhjyQ0wBR8	Movimento Antivacina e Suas Ameaças - Sala de Convidados	no		1551280841	Canal Saúde Oficial	UC0Q3GfF9amdyyjTA9DpTnyw	Education	1704	53	11	0.20754716981132	0	21
nL_XfTy0fzM	As 40 Cidades Fantasmas (Abandonadas) mais Incríveis do Mundo	no		1438014189	Nightmare	UCOO3a8hkldq6zGAOxgvZndw	Entertainment	1564872	28333	724	0.025553241802845	0	852
vmz-pqsev88	O QUE É O MOVIMENTO ANTIVACINA? | com Paulo Sergio	no		1571758448	Politize!	UC0NtqwtL1oLxwm3lx_Uo5Og	Education	974	129	2	0.015503875968992	0	13
Kp7NO5YAv6M	REDAÇÃO NOTA 1000: Os riscos do crescimento do movimento antivacina no Brasil - Brasil Escola	no		1564500601	Brasil Escola	UCsgHWN8lYveMUEWTDheTjZA	Education	7994	692	8	0.011560693641618	0	39
QLsdHvd9Zkw	2ª Maratona PGDF – Técnico Jurídico	no		1581292940	Gran Cursos Online - Concursos Públicos	UC74icFVsxTFr2BW3Vm8n_iw	Education	13687	992	9	0.0090725806451613	0	6
ttzbNjMwH2g	Boa Noite 247 - Veja produz prova contra Moro	no		1561767313	TV 247	UCRuy5PigeeBuecKnwqhM4yg	News & Politics	60330	6336	273	0.043087121212121	0	201
AvLrVJGOqus	#AlexandreBorges: A grande revolução no Brasil seria a implementação da normalidade	no		1561563930	Jovem Pan - 3 em 1	UCEsbaUdrM_87K-2um30hf8Q	News & Politics	2799	158	12	0.075949367088608	0	18
9dvXrzXwlJI	Bolsonaro rebate Merkel: como meio ambiente gera tensão para o Brasil no G20	no		1561646607	BBC News Brasil	UCthbIFAxbXTTQEC7EcQvP1Q	News & Politics	233260	11612	2758	0.23751291767137	0	3256
Ti7MDeitKkQ	Jornal da Manhã - Edição completa - 26/06/19	no		1561573819	Jovem Pan News	UCP391YRAjSOdM_bwievgaZA	News & Politics	205968	6460	409	0.063312693498452	0	27
WaNXqD_aixw	Os Pingos Nos Is - 26/06/19 - Abuso de autoridade / Moro recebe apoio / Entrevista com Kajuru	no		1561595560	Os Pingos nos Is	UCzjtGnD7qqeaHW3nvDVrjQA	News & Politics	356486	24743	569	0.022996403023077	0	606
6Q_9T1M6m5Q	E SE A FEBRE AMARELA CHEGAR NO ENEM? | DOSE DE ATUALIDADES	no		1500494347	Descomplica	UCT0JugAtGmqiYkwxFZOwAtg	Education	99511	9941	70	0.0070415451161855	0	145
1AwCV9VTxVs	Encontro do 247 em Olinda (29.6.2019) - Parte 2	no		1561854864	TV 247	UCRuy5PigeeBuecKnwqhM4yg	News & Politics	46368	5407	224	0.041427778805252	0	99
5_WULipuPeY	Uma mensagem de Bill Gates para os Leões [PO]	no		1445279993	Lions Clubs International	UCI4mls1kw1nChubkbVeRLKw	Nonprofits & Activism	7463	70	46	0.65714285714286	0	71
Y8taeVtKtag	O que são movimentos antivacinação?	no		1536624106	Professor de Atualidades	UCg7yfJ8e1TRqyA1tSkALyzg	Education	3454	290	8	0.027586206896552	0	39
LbyYQTeOFx8	Bom dia 247 (3.7.19): Bolsonaro vaiado Moro massacrado	no		1562152221	TV 247	UCRuy5PigeeBuecKnwqhM4yg	News & Politics	94574	11760	651	0.055357142857143	0	735
OIIiNCWB-FE	Bom dia 247 (28.2.19): as bijuterias de nióbio de Bolsonaro	no		1561720497	TV 247	UCRuy5PigeeBuecKnwqhM4yg	News & Politics	67420	8207	261	0.031802120141343	0	516
8US7s0C9Q7I	BRASIL vs PARAGUAI - COPA AMÉRICA (AO VIVO)	no		1561692980	Gol Contra	UC52YPxBsiE7Xcf_53WYXvTQ	Sports	31400	837	77	0.091995221027479	0	10
6pZZnk1RXyw	TRAÍRAS NO GOVERNO BOLSONARO...	no		1562035388	CRISTALVOX	UCOzxzEu70fNClG-9nNi4Yzw	News & Politics	29895	5045	121	0.02398414271556	0	61
Kgbc_OzEIPo	URGENTE: EXPLODIU O INTERCEPT BRASIL!	no		1561829556	CRISTALVOX	UCOzxzEu70fNClG-9nNi4Yzw	News & Politics	55508	7908	283	0.035786545270612	0	274
19kezLD80NM	Live: Moro vazamentos e a crise: o que pode acontecer no Brasil. 12/06/19	no		1560339826	Marco Antonio Villa	UCVqNUy4-FTLMwMKX-krfB6A	Education	80007	8629	1365	0.15818750724302	0	1169
VNClrx66LmU	ELEIÇÕES 2018 (feat. Mas Afinal Leitura Obrigahistória e Lucio Big)	no		1521089550	Canal do Pirulla	UCdGpd0gNn38UKwoncZd9rmA	News & Politics	202094	8267	463	0.056005806217491	0	919
JwEm3ORm87k	Os 5 Milhões de caixões comprados pelo governo americano afinal para qual propósito?	no		1274201429	fboyt	UCllbSdCRAEsPGa4JpJuLZHg	Film & Animation	546376				0	134
i-GS8N-ZD4w	Aha uhu Verdevaldo não derruba Moro	no		1562526633	José Nêumanne Pinto	UCnZOYk5co0M7hA5z1ML_45g	Entertainment	193531	37657	327	0.0086836444751308	0	1862
W_61YqlGDls	BRASIL PATÉTICO E COPA AMÉRICA FIASCO	no		1561689875	1x0 Feminino	UCjSgG4M0KM0jDBgkjwFVrjg	Sports	44569	6105	351	0.057493857493857	0	961
6_BcHq2recA	Live: Previdência Moro e os vazamentos 13 06 19	no		1560426514	Marco Antonio Villa	UCVqNUy4-FTLMwMKX-krfB6A	Education	72885	7492	850	0.11345435130806	0	835
Lz9tw4j9GIg	A Dr.Rauni Kilde fala sobre a conspiração por trás da vacina da Gripe A em entrevista	no		1374235402	Paradigma da Matrix	UCxy9I7D4Q8VSx1wunLsntOQ	News & Politics	8034	119	4	0.033613445378151	0	6
m7ctAH51DzQ	Bill Gates diz que vai reduzir 10 a 15% da população mundial através da vacinação...	no		1308689296	Paulo Almeida	UCKfap1xgEqqAhN7jtYgDsYg	Entertainment	16555	133	22	0.16541353383459	0	18
HoXOWylPeQ4	Redução da População Global O Discurso	no		1315700923	resistencianom	UCAGWqQrxEF0Jb35zDnNaLgg	News & Politics	3570	76	5	0.065789473684211	0	16
yrFwIWqjfOs	House MD. VS Antivacinas em Português	no		1531108740	Filipe Martins	UCjnw-Wmtd7O89zlFSh1O2SA	Comedy	6062	135	28	0.20740740740741	0	7
e38oeJanYYs	Sergio Moro LADRÃO e Bolsonaro TRAIDOR: DESGOVERNO!	no		1562151606	Toni Dozane Oficial	UCdsgzVdqZ9Muii2OpR3t_ww	Entertainment	81542	8204	320	0.039005363237445	0	1070
LR2ga077teI	ANTIVACINA NA CONVERSA COM BIAL | PORQUE A GLOBO QUER QUE VOCÊ SE VACINE? MOVIMENTO ANTIVACINA	no		1566012507	Americo Moura Resumindo Tudo	UC9npsqVPOTyKQK8TiVDAe2Q	Travel & Events	5013	677	43	0.063515509601182	0	159
Ceuui8Oimik	Moro (Veja e Intercept): JUSTIÇA SABIA DE TUDO!	no		1561806000	Toni Dozane Oficial	UCdsgzVdqZ9Muii2OpR3t_ww	Entertainment	56536	5917	320	0.054081460199425	0	598
jzOMiq9lB_I	Manifestação pró-Bolsonaro fracassa e historiador prevê renúncia	no		1558908224	TV 247	UCRuy5PigeeBuecKnwqhM4yg	News & Politics	409523	16265	39309	2.4167845066093	0	13083
nNY_xCKOPI8	Bronquiolite | Dra Ana Escobar	no		1526917111	Dra Ana Escobar	UCKtJs_zI1yzswHDWqkqHtWw	Education	59342	1418	30	0.021156558533145	0	17
QMNwnqSF7Ms	Coriza | Dra Ana Escobar	no		1514986680	Dra Ana Escobar	UCKtJs_zI1yzswHDWqkqHtWw	Education	41441	1308	42	0.032110091743119	0	33
CPJD4GGWReM	Protetor Solar e Repelente | Dra Ana Escobar	no		1545317642	Dra Ana Escobar	UCKtJs_zI1yzswHDWqkqHtWw	Education	1178	123	1	0.008130081300813	0	2
WbWimhT7lxk	Campanha de Vacinação contra a Poliomielite e Sarampo (60 )	no		1533044929	Ministério da Saúde	UC12zKGLhMhDeDidoctM6BrA	Nonprofits & Activism	95429	614	115	0.18729641693811	0	46
JJCWUBtU-do	Quais Frutas o Diabético Pode Comer? | Dr. Juliano Pimentel	no		1506362161	Dr Juliano Pimentel	UCPGGSQfN8LREy6dWdk85fpw	People & Blogs	1306384	57665	1790	0.031041359576866	0	470
mjc0DfJAPH0	12 Coisas Perigosas Que Você Faz Com o Seu Cachorro Sem Nem Se Dar Conta	no		1532780123	INCRÍVEL	UCIQPHl1WKKTt9KkWyo_JNig	People & Blogs	5120447	285980	6808	0.023805860549689	0	7274
tGTiTPmqK_4	Sarampo | Dra Ana Escobar	no		1531861609	Dra Ana Escobar	UCKtJs_zI1yzswHDWqkqHtWw	Education	3245	174	1	0.0057471264367816	0	19
uM0B60DEdPY	Gripe: Antibióticos X Vacinas | Dra Ana Escobar	no		1460467454	Dra Ana Escobar	UCKtJs_zI1yzswHDWqkqHtWw	Education	18369	55	3	0.054545454545455	0	2
ZApSMLJpDlg	Dúvidas e Dicas sobre Febre | Dra Ana Escobar	no		1559325567	Dra Ana Escobar	UCKtJs_zI1yzswHDWqkqHtWw	Education	3701	306	2	0.0065359477124183	0	6
UJbKtUj8Nxw	Calendário de Vacinação nos Primeiros Meses do Bebê | Clínica Pró Imune	no		1476923295	Cinemátika Filmes - Produtora de Vídeo	UC4aOaBcNPsZlSREx0p71jeA	Science & Technology	21588	435	24	0.055172413793103	0	11
SywTQeXLNjc	Diabetes Infantil | Dra Ana Escobar	no		1555524914	Dra Ana Escobar	UCKtJs_zI1yzswHDWqkqHtWw	Education	996	73	0	0	0	2
TYUkpBFWpC4	Vacinação contra pólio e sarampo no RJ atinge apenas 1/3 do público-alvo	no		1535114346	Jovem Pan News	UCP391YRAjSOdM_bwievgaZA	News & Politics	547	7	3	0.42857142857143	0	1
6x5eGvvLNaY	Mito ou verdade? Bebida alcoólica corta o efeito do antibiótico?	no		1381163619	Jovem Pan News	UCP391YRAjSOdM_bwievgaZA	News & Politics	622587	7635	345	0.045186640471513	0	488
RWEKN5SW5pQ	Vacinação durante a amamentação | Pro Matre Paulista	no		1429115670	Pro Matre Paulista	UCMT22yw2FIvF7dW6dJ_6EnQ	Science & Technology	2980	10	0	0	0	0
rlVvsODOUsM	Primeira vacina de um filhote | Importância e cuidados [Ju Almeida Pet]	no		1465249015	Ju Almeida Pet	UCDfwywWnYoB7sHPV5udsj0g	People & Blogs	329614	8437	243	0.028801706767808	0	352
22NV8JfIyEE	VACINAS VIP e VOP contra POLIOMIELITE | Calendário de vacinação infantil | Parte 3 e 4	no		1525549501	Enfermundo	UC8IbAhPglJ1OeC44A_Gtmqg	Education	30335	825	25	0.03030303030303	0	18
2Vv8Myc4EoE	Insolação | Dra Ana Escobar	no		1549650846	Dra Ana Escobar	UCKtJs_zI1yzswHDWqkqHtWw	Education	3499	235	2	0.0085106382978723	0	13
l6CJnkOmCFQ	Caxumba | Dra Ana Escobar e Michelle Loreto	no		1561741111	Dra Ana Escobar	UCKtJs_zI1yzswHDWqkqHtWw	Education	928	68	0	0	0	4
HQ1PZWibhMw	Reforço na vacinação contra Sarampo continua e chega ao Centro	no		1521757774	Band Amazonas	UCi0ftpk_k9UhC2oNrnxatNA	News & Politics	537	4	0	0	0	0
Ft-GGlq4XR0	Grávidas devem tomar vacinas; saiba quais são	no		1431708624	Jornal da Alterosa	UCxbqmMsXory_zC-kNqKHUgw	News & Politics	31391	157	18	0.11464968152866	0	9
AH0AWSPYMrQ	SARAMPO Sintomas transmissão e vacina quem deve tomar e quando	no		1563296401	Almanaque dos Pais	UCy7oVBYY0FGXeeJpy6ITXxQ	People & Blogs	4353	378	11	0.029100529100529	0	38
hW0hhDAXdX0	O Sarampo voltou? O que você deve saber | RESUMÃO	no		1532907072	Enfermundo	UC8IbAhPglJ1OeC44A_Gtmqg	Education	7132	300	3	0.01	0	7
PRrzWnvwSnk	Vacinação contra sarampo e pólio será reforçada em João Pessoa	no		1531239497	TV Correio	UCJ4uxK_mo6gNoqk9cyvgWkw	News & Politics	697	5	1	0.2	0	0
BOb2ruOe3XU	Sarampo: saiba tudo sobre essa doença	no		1531513744	Eludicar Centro Pediátrico	UC8QNlbRIeKQsbG8u_qIzowQ	People & Blogs	28399	881	35	0.039727582292849	0	29
06WSuF28LnM	Sarampo - Saiba por que é importante prevenir | Sua Saúde na Rede	no		1521459634	Sua Saúde na Rede	UC_er6_R1PKUCxc7QSXxIvzw	Education	17514	351	23	0.065527065527066	0
kj6Wc7f9Loo	Gripe na gravidez: como evitar e tratar com receitas caseiras	no		1522242007	Almanaque dos Pais	UCy7oVBYY0FGXeeJpy6ITXxQ	People & Blogs	135067	12083	143	0.011834809236117	0	443
HA85VZlvHqQ	Entenda a Síndrome do Intestino Irritável!	no		1523966729	Dr. Fernando Lemos	UChXNyp6dL_aY_3qwVgDd-EQ	People & Blogs	237292	14765	234	0.015848289874704	0
7SRVt6-geMM	Dores na Barriga! O que será?	no		1521031111	Dr. Fernando Lemos	UChXNyp6dL_aY_3qwVgDd-EQ	People & Blogs	981872	33041	878	0.02657304561	0
5tKdwyeU_so	Mito ou verdade: bebida alcoólica corta efeito de medicamento?	no		1440172545	Sinal Verde Caxias	UC2P4D6uHis-ENplUEPyK4tA	News & Politics	28008	146	21	0.14383561643836	0	8
pZzENuSEo24	Banana versus Intestino: Mitos e Verdades	no		1508635569	Dr. Fernando Lemos	UChXNyp6dL_aY_3qwVgDd-EQ	People & Blogs	747479	47849	917	0.019164454847541	0
vwWfywGVj7s	Qual é a Fibra ideal? O Especialista esclarece.	no		1532537139	Dr. Fernando Lemos	UChXNyp6dL_aY_3qwVgDd-EQ	People & Blogs	198415	20215	256	0.012663863467722	0
wW99VYHtois	Dra. Mônica Valverde Viana - Febre Amarela: Vacinar ou Não? Tire suas Dúvidas!	no		1516741950	Dra Monica Valverde Viana	UCEA5mVrH3jPMmuah5qD0DUA	People & Blogs	23613	602	36	0.059800664451827	0	257
Y8r6MPNroi4	PRIMEIROS SINTOMAS DE GRAVIDEZ (EITAAA) - Dr Bruno Jacob	no		1529443801	GINECO SINCERO	UCtgFbv9VEh7IOw3vxMAP43A	People & Blogs	2118015	78614	2149	0.027336097896049	0	9197
WZlI0htOB1c	Acabe com o BOLO na GARGANTA!	no		1530834162	Canal do Mau Hálito	UCJZOLak0v_pR6AjYsbyAoog	Science & Technology	656047	33784	712	0.021075065119583	0	1858
S9hE5fGq9P4	Matéria Vacina Sarampo	no		1533225973	Tv3Fronteiras	UCwHG6bZ-zd9tffVc4QwtOoA	Education	261	4	0	0	0	0
_nC7fObHQFU	Por que eu uso Probióticos diariamente?	no		1522083148	Dr. Fernando Lemos	UChXNyp6dL_aY_3qwVgDd-EQ	People & Blogs	338487	27366	321	0.011729883797413	0
bZljHUqY5CM	O que é sarampo	no		1531958499	Dr Web Seu medico virtual	UC-g7_TRxesywauLDNeJ0DmA	People & Blogs	824	21	0	0	0	10
oufeD65wFD0	Próximo sábado é Dia D de Vacinação contra o Sarampo e Paralisia Infantil	no		1534284221	Comunicação Taió	UCVWZvc0z_WE2JTy-6y1g52A	People & Blogs	26	1	0	0	0	0
BAs081pAD5k	O que comer na gravidez semana a semana	no		1497916915	Viva Saúde Sempre	UCupEIFDJHe9c_KF2bazgKkw	Howto & Style	130280	4302	113	0.026266852626685	0	39
jxiVxj4ldTs	[AO VIVO] EDIÇÃO ESPECIAL CHUVAS BORA SP e BRASIL URGENTE - 10/02/2020	no		1581342183	Band Jornalismo	UCoa-D_VfMkFrCYodrOC9-mA	News & Politics	28511	1888	81	0.042902542372881	0	0
EodPI1m0Np0	Sarampo preocupa região norte do Brasil	no		1520949813	Fala Brasil	UCwVmZjJwkCUCOes5_eAIebg	News & Politics	1008	10	0	0	0	0
cTphXWYy2Cs	Ministério da Saúde investiga surto de sarampo em navio	no		1550686688	Band Jornalismo	UCoa-D_VfMkFrCYodrOC9-mA	News & Politics	1805				0	2
6RoijyfUacA	Volta do sarampo caxumba e febre amarela assustam brasileiros	no		1521432449	Domingo Espetacular	UCP-Vg2PcmLiWpEdvMI1R35w	Entertainment	7061	162	7	0.04320987654321	0	37
ZSF3boyvYwo	Epidemia do coronavírus ameaça a economia global	no		1581344212	Band Jornalismo	UCoa-D_VfMkFrCYodrOC9-mA	News & Politics	224	27	1	0.037037037037037	0	4
X3MvVSgE6ck	Suas Orelhas Podem Indicar sua Saúde: Não Ignore esses 8 Fatores	no		1512811259	INCRÍVEL	UCIQPHl1WKKTt9KkWyo_JNig	People & Blogs	2325250	54361	2104	0.038704218097533	0	1645
4N9NRtMiFHY	Vacinação contra sarampo e pólio será reforçada em João Pessoa	no		1531264424	TV Correio	UCJ4uxK_mo6gNoqk9cyvgWkw	News & Politics	367	5	0	0	0	0
PqGXgyfJVys	#FalaGotinha - Vacinas para crianças até 1 ano	no		1546023956	Ministério da Saúde	UC12zKGLhMhDeDidoctM6BrA	Nonprofits & Activism	6078	111	9	0.081081081081081	0	0
gubEcorYp18	Se Você Se Deparar com Estas Árvores Fuja Rápido e Grite por Ajuda!	no		1529002802	INCRÍVEL	UCIQPHl1WKKTt9KkWyo_JNig	People & Blogs	1716412	35474	2285	0.06441337317472	0	1605
kCwoVUwp8us	Filme sul-coreano Parasita é o grande vencedor do Oscar 2020	no		1581352851	Band Jornalismo	UCoa-D_VfMkFrCYodrOC9-mA	News & Politics	1136	140	2	0.014285714285714	0	16
wJRjUngPukY	Campanha deve vacinar 11 milhões de crianças contra poliomielite e sarampo	no		1533617763	Jornal da Record	UCmpHPgeCBgvk_fDXZQKsnAA	News & Politics	3116	27	1	0.037037037037037	0	2
c--YbazXmww	Francês é atacado ao caminhar em Copacabana	no		1581351855	Band Jornalismo	UCoa-D_VfMkFrCYodrOC9-mA	News & Politics	232	24	1	0.041666666666667	0	4
-4Ah3PjWKEk	Chuva em SP: deslizamento de terra causa pânico na cidade.	no		1581344463	Band Jornalismo	UCoa-D_VfMkFrCYodrOC9-mA	News & Politics	2055	97	1	0.010309278350515	0	17
7EJ40GOwm1o	Caos em SP: chuvas travam a cidade inteira	no		1581343716	Band Jornalismo	UCoa-D_VfMkFrCYodrOC9-mA	News & Politics	6620	644	19	0.029503105590062	0	137
JU6E-29vjgU	O Mistério da Grande Pirâmide Foi Finalmente Solucionado	no		1509928891	INCRÍVEL	UCIQPHl1WKKTt9KkWyo_JNig	People & Blogs	4572900	226904	19704	0.086838486760921	0	8658
SDX1R_uR5C4	Ministério da Saúde cria campanha de combate a fake news sobre vacinação	no		1538071056	Jornal Hoje em Dia	UCaPx61H8Gu9a6Zg4riqV-jA	News & Politics	10039	227	5	0.022026431718062	0	2
-RmkTQG6mCI	Ministério da Saúde orienta médicos para controle de surtos de sarampo	no		1531752263	Fala Brasil	UCwVmZjJwkCUCOes5_eAIebg	News & Politics	342	12	0	0	0	0
i68-JjrZ-mg	WebPalestra: Mudanças no Calendário Nacional de Vacinação para o ano 2018	no		1516703909	Telessaúde ES	UChFIPDFYjTFg03eWlwmQcTA	Education	17708	375	9	0.024	0	5
Ox6lDCbDHU8	Campanha de vacinação contra pólio e sarampo	no		1532101219	Prefeitura de Valinhos	UCDxm_d8VSOd68Udl25ycU9Q	News & Politics	2012	13	0	0	0	0
k4yOh7vIWCg	10 Alimentos Que Você Jamais Deveria Comer	no		1527773123	INCRÍVEL	UCIQPHl1WKKTt9KkWyo_JNig	People & Blogs	4640162	100479	17456	0.17372784362902	0	8222
UxYUzIee3sI	Vacinação contra pólio e sarampo atinge apenas 16% do público-alvo	no		1534329158	Jovem Pan News	UCP391YRAjSOdM_bwievgaZA	News & Politics	616	17	3	0.17647058823529	0	2
ygysa5MFA8Q	Veja medidas de segurança para evitar tragédias nas chuvas de SP	no		1581355535	Band Jornalismo	UCoa-D_VfMkFrCYodrOC9-mA	News & Politics	820	80	2	0.025	0	9
6Sw24RkH64o	Quanto mais inteligente menos sociável ● Leandro Karnal	no		1526822383	Saber Filosófico	UCWdXgfpEIZIGzah9_yCL-Xw	Education	1836846	77326	3411	0.044111941649639	0	5092
na6jsnZlZ2U	Chuvas em SP: Linha 9 da CPTM está interrompida	no		1581352795	Band Jornalismo	UCoa-D_VfMkFrCYodrOC9-mA	News & Politics	340	33	1	0.03030303030303	0	0
29BXXxAmDUg	10 alimentos venenosos que te matam pouco a pouco	no		1512493201	Fatos Desconhecidos	UCbAiIkPobUFy71zlmwVw3jw	Entertainment	3969053	120672	8681	0.071938809334394	0	6610
3XiURHILKmc	O Que Acontecerá Com o Seu Corpo Se Você Caminhar Diariamente	no		1524649173	INCRÍVEL	UCIQPHl1WKKTt9KkWyo_JNig	People & Blogs	3355839	265513	3024	0.011389272841631	0	3277
2L-bnQ2Up3s	Vacinação abaixo da meta em várias doenças	no		1530830941	Jornal da Gazeta	UCNl_i-ggJbZNyOLlhE7yyhw	News & Politics	360	20	0	0	0	1
AYifJcNHG5U	Amazonas pede ao Ministério 50 mil doses de vacina contra sarampo	no		1519427134	Band Amazonas	UCi0ftpk_k9UhC2oNrnxatNA	News & Politics	377	2	0	0	0	0
Mt4gn3n5ixM	Campanha nacional de vacinação contra sarampo tem sido antecipada	no		1531419587	TVC HD Canal 13.1	UCYQHpNEyjWsGQb06RJa4lkw	Nonprofits & Activism	1576	16	3	0.1875	0	0
C1zOSN3zqUA	XUXA e CAMPANHA de VACINAÇÃO 2018 contra POLIOMIELITE e SARAMPO?!	no		1532889041	Conhecimento Bigode	UCyCZb-wsvM_VFKSbyKftgHg	Education	2131	16	1	0.0625	0	4
t1PXaUcMLFs	Secretária de saúde fala da vacina contra o sarampo e abertura da UPA em Iporá	no		1531260331	Nova Visão TV	UCf_SYqbShDoViewDGxaj2BA	News & Politics	414	16	1	0.0625	0	0
vpESVJw8I-k	Manaus decreta situação de emergência diante de surto de sarampo	no		1530705781	Jovem Pan News	UCP391YRAjSOdM_bwievgaZA	News & Politics	697	27	5	0.18518518518519	0	17
ukb1djhxkXg	RN inicia campanhas de prevenção após surto de sarampo em alguns estados do nordeste	no		1532976001	TVU RN	UCQkzzY4zcndB6d09MKiP1yw	News & Politics	17	0	0		0	0
uKcPN0oDGvc	Desvende o boato que o Brasil está importando ovos da China	no		1530134733	Balanço Geral MG	UCqTxFR0G0ulWso4ZP8z3IJA	Entertainment	429515	7967	1008	0.12652190284925	0	2215
nVMSSF9nwJQ	Programa Bem Estar 28/03/2018 - SURTO SARAMPO NOVO VÍRUS DA GRIPE H3N2 E MAIS - ÍNTEGRA	no		1522254316	Bem Estar no YOUTUBE	UCyR4dkya5rC7ZVJFNBrOMrg	Entertainment	2452	50	5	0.1	0	4
O9Vcssc1RIk	Teste ancestral: como funciona?	no		1581348600	Band Jornalismo	UCoa-D_VfMkFrCYodrOC9-mA	News & Politics	261	29	0	0	0	3
FGUC5Pq_-j0	8 dicas para reduzir dor nas injeções	no		1461602553	Aplicar Conteúdos em Saúde	UCkke64Kird1ZcZsPJEo_hYg	Education	258350	6437	193	0.029982911294081	0	210
rdU2-L_5bvc	Chuva em SP: acaba estado de alerta em algumas regiões	no		1581359631	Band Jornalismo	UCoa-D_VfMkFrCYodrOC9-mA	News & Politics	247	25	1	0.04	0	1
6OX5vS-e5dI	Vacina contra sarampo é recomendada para quem vai viajar	no		1516873733	Record News ES	UCUBpKLunWjAECCw1yuY2dww	News & Politics	420	4	0	0	0	0
SzUId-Vn_OI	Sarampo: Como prevenir? | Dr. Salim CRM 43.163	no		1521760632	Doutor Salim	UCyxHMt8QHJgsvLs-5VF_fcQ	People & Blogs	1423	34	1	0.029411764705882	0	2
fLtI8Ixd9IM	Vacinação - Jornal Nacional 03/07/18	no		1530682398	Iris Vivianne Resende Mendes	UC3Jnb0QsCR_kRMV7RhJ7whQ	People & Blogs	471	8	0	0	0	0
3vTFS7LQOC8	BRASIL PERDEU a COPA 2018 muito ANTES dela começar ! (Assista e Entenda - França e Macron)	no		1531051201	DESPERTE. - Thiago Lima -	UCwQdXKdraEfNZv9b4IWFn5g	People & Blogs	977407	49965	4353	0.087120984689283	0	4516
fZTO8qxVOQw	Liberdade só até 2023: Explicando o Comercial do Itaú! Veja a Ligação com 1984 George Orwell	no		1518957870	Rômulo Maraschin	UCSyUhW3u3JazIT3VtE4nCEw	People & Blogs	1563900	64502	6063	0.093997085361694	0
QseqATiCqUw	Você Terá VIDA LONGA?? Basta Olhar Seu Umbigo! Descubra Como Anda Sua Saúde!	no		1527591602	Natural- Dicas Caseiras	UCjn8lktJ0qykReZ_FsPxH8w	Howto & Style	975451	28475	1861	0.065355575065847	0	316
cneunFXDRoA	Comida orgânica nunca mais	no		1530975608	verdadeoculta	UCPHXtAKuUXPOwdEUzMgSD0A	News & Politics	24566	1907	43	0.02254850550603	0	174
FHD9PApGdI4	Judeu explica por que o Brasil esta em crise.	no		1509030000	Ezequiel Cordeiro - Hora Final	UCl4swlkSKDinuw5w5S77m8A	People & Blogs	1297414	42291	2451	0.057955593388664	0	6420
NtgLcKDCIyA	Plenário do Senado - Sessão não deliberativa - 10/02/2020	no		1581345037	TV Senado	UCLgti7NuK0RuW9wty-fxPjQ	Entertainment	900	85	15	0.17647058823529	0	0
3IabRhSVKzI	BandNews FM AO VIVO - 10/02/2020	no		1581351618	Rádio BandNews FM	UCWijW6tW0iI5ghsAbWDFtTg	News & Politics	608	74	2	0.027027027027027	0	0
7lDw52QQqGo	TV Senado - Assista agora - 10/02/2020	no		1581332972	TV Senado	UCLgti7NuK0RuW9wty-fxPjQ	Entertainment	2307	131	10	0.076335877862595	0	0
cb0N0ZsZkbk	Um Olhar Sobre o Mundo | Olavo de Carvalho	no		1543950507	tvbrasil	UCSv9d0kQegylHWpP83jWSQg	Entertainment	247338	16034	1098	0.068479481102657	0	1397
MIloJPdLBy8	Vacinação - parte 01	no		1517257340	DoutorMoises	UCW3l9WndLOjhRtsg0Aa--2g	Science & Technology	27553	1039	41	0.039461020211742	0
l66Wpr2sI_w	VILLA TÁ COLHENDO O QUE PLANTOU!! CONSTANTINO É CULPA DELE | ENTENDA	no		1581357611	O Historiador	UC5ZXYxeWlROKbL7JziJ0bIQ	Pets & Animals	3695	1020	6	0.0058823529411765	0	51
ZNRHpR28LLk	NOTAS DO E.N.E.M PODEM ESTAR ERRADAS AFIRMA FUNCIONÁRIOS DO MEC	no		1580596200	O Historiador	UC5ZXYxeWlROKbL7JziJ0bIQ	Pets & Animals	7716	2059	12	0.0058280718795532	0	113
_ENrC9rdqL8	UM CURSO DE HISTÓRIA PARA O MBL	no		1543407301	O Historiador	UC5ZXYxeWlROKbL7JziJ0bIQ	People & Blogs	11545	2735	80	0.029250457038391	0	351
XgBeZSCkrlE	Olavo de Carvalho sobre o que é o movimento comunista e a materialização de conceitos abstratos	no		1562870700	Peruvian Mav	UCSBSGWNP1RK74Wh7XYex_Gw	News & Politics	38492	3333	43	0.012901290129013	0	139
iIEIQKh7mvs	EMBRATUR ENTRE O BRASIL | BOLSONARO E WITZEL | VERGONHA	no		1581046205	O Historiador	UC5ZXYxeWlROKbL7JziJ0bIQ	Pets & Animals	5164	1520	9	0.0059210526315789	0	85
N5jx5KxKtko	Kim destrói professor prepotente e defensor de doutrinação	no		1495576288	MBL - Movimento Brasil Livre	UC8QAdpiEWAOg3AOCCFDCOYw	Nonprofits & Activism	2092067	99132	2489	0.025107936892225	0	6203
dVd_HE9cpco	O que é Olavo de Carvalho? O que o Meteoro não mostrou	no		1543661102	Filósofo Paulo Ghiraldelli	UCBMKrkHv07GoYb5ITLt0sYQ	News & Politics	203533	22563	2087	0.092496565173071	0	2628
WL82xOYq-yc	O MBL E O KIM KATAGUIRI PRECISAM VER ESTE VIDEO	no		1543590005	O Historiador	UC5ZXYxeWlROKbL7JziJ0bIQ	People & Blogs	38813	5842	1047	0.17921944539541	0	1075
zaZpOyx4_z8	A VACINA CONTRA OS TODOS OS MALES DA HUMANIDADE -- com a médium Isabel Salomão de Campos	no		1561164599	acasadocaminho	UCBGwJ-nEfpZFrckezomBD5w	Nonprofits & Activism	6212	821	7	0.0085261875761267	0	34
pd3mX1QJG-c	URGENTE: OLAVO DE CARVALHO ADMITE EM POST QUE SÓ TEM 4ª SÉRIE	no		1543343400	O Historiador	UC5ZXYxeWlROKbL7JziJ0bIQ	People & Blogs	18058	3614	179	0.049529607083564	0	651
tiGQApB7UeY	BOLSONARO DEIXA MAGNO MALTA DE FORA DA MAMATA	no		1543684501	O Historiador	UC5ZXYxeWlROKbL7JziJ0bIQ	People & Blogs	28446	4625	122	0.026378378378378	0	701
g75wnPWKPZk	Lúpus | Ana Luisa Calich	no		1415628013	Drauzio Varella	UC9zqTTVeClpqMQ5CLuJdWtw	Science & Technology	315051	8422	162	0.019235336024697	0	274
Gy3CBIOkrKY	NANDO MOURA DEFENDE CANAL RACISTA E DIZ QUE A ESQUERDA ESTÁ CENSURANDO CANAIS	no		1544368501	O Historiador	UC5ZXYxeWlROKbL7JziJ0bIQ	People & Blogs	16368	3673	176	0.047917233868772	0	478
Y0VgXwtECvY	MamaFalhei passando vergonha no pânico!	no		1512502554	O Historiador	UC5ZXYxeWlROKbL7JziJ0bIQ	People & Blogs	3393	524	80	0.15267175572519	0	72
msOv_j3Gi80	OLAVO DE CARVALHO É UM ASTRÓLOGO IDIOTA? SIM! PROVANDO PARA O NANDO MOURA	no		1543888575	O Historiador	UC5ZXYxeWlROKbL7JziJ0bIQ	People & Blogs	8857	1352	89	0.065828402366864	0	150
D7vJkuBNXw8	ENSINANDO DIFERENÇA DE REPÚBLICA E DEMOCRACIA AO KIM KATAGUIRI	no		1543493701	O Historiador	UC5ZXYxeWlROKbL7JziJ0bIQ	People & Blogs	15579	3210	188	0.058566978193146	0	491
29MJ3g5QVA0	JOVEM PAN UTILIZA JOVEM PARA MENTIR SOBRE POLITICA E BOLSONARO	no		1543840200	O Historiador	UC5ZXYxeWlROKbL7JziJ0bIQ	People & Blogs	53503	7055	4097	0.58072289156627	0	2622
cZj_uqySxLc	PORTA DOS FUNDOS RIDICULARIZA NANDO MOURA E OLAVO DE CARVALHO	no		1543610701	O Historiador	UC5ZXYxeWlROKbL7JziJ0bIQ	People & Blogs	14183	3020	107	0.035430463576159	0	369
RMx11vOz3lM	OLAVO DE CARVALHO X LOBÃO: PROVE QUE A TERRA É PLANA!	no		1559825140	Henry Bugalho	UCC6f63SXY0CDpsPGDBtTWVg	News & Politics	80993	8873	1077	0.12137946579511	0	1587
JAagpiCnFJA	HENRY BUGALHO X OLAVO DE CARVALHO QUAL O FORMATO DA TERRA	no		1560232274	Olavo de Carvalho	UC6RQhzm93SterWntL7GzqYQ	Comedy	84118	9118	1083	0.11877604737881	0	2340
BND8DT_1qjs	CAIO COPPOLLA E FELIPE MOURA BRASIL | A VERGONHA ALHEIA NA JOVEM PAN	no		1548594900	O Historiador	UC5ZXYxeWlROKbL7JziJ0bIQ	People & Blogs	59182	7872	5635	0.71582825203252	0	3061
kwTSFOYjpWE	URGENTE: DIAS TOFFOLI DERRUBA DECISÃO QUE SOLTAVA LULA	no		1545261432	Terça Livre TV	UC7qK1TCeLAr8qOeclO-s39g	News & Politics	39666	5635	42	0.0074534161490683	0	349
JRSHbAIZCz0	Epidemias No Brasil - Para Ajudar Na Redação Do ENEM	no		1471969920	Cátia Santos	UCVUF80k8eY8T5-18TPL9xDA	Education	15829	744	11	0.014784946236559	0	30
XAFyLS1QHok	A QUEDA DA DIREITA NO YOUTUBE	no		1556939985	LiloVLOG	UC9sV0ieuVY2_K4LucZf4yow	People & Blogs	96610	21578	232	0.010751691537677	0	1459
WOd2nrEUQOg	A LOUCURA DE ADÉLIO E A GENIALIDADE DE BOLSONARO	no		1552042808	Daniel Lopez	UCpLR-q8rFLe_rEAXf4PRxRg	Entertainment	238695	48590	344	0.0070796460176991	0	2985
8637VSSsn5c	A RESISTÊNCIA RACHOU?| MINHAS SINCERAS DESCULPAS A JOICE HASSELMANN	no		1545605862	O Historiador	UC5ZXYxeWlROKbL7JziJ0bIQ	People & Blogs	44912	6817	320	0.046941469854775	0	1207
b_p-4yeinGg	JÁ COMEÇOU A MAMATA NANDO?!	no		1546713676	Henry Bugalho	UCC6f63SXY0CDpsPGDBtTWVg	News & Politics	139545	23774	2565	0.10789097333221	0	2276
07MjhBjb5aA	GUAIDÓ ARREGOU!	no		1551351600	Daniel Lopez	UCpLR-q8rFLe_rEAXf4PRxRg	Entertainment	103076	18134	181	0.0099812506893129	0	987
TJKwEviXkTA	Timerosal e Vacinas	no		1536521400	Tia Cris Pediatra	UC-GUlZA9SFdyl6RrQP3A3qQ	People & Blogs	417	24	5	0.20833333333333	0	15
TAfZIwLVlSs	Madeira é Agro	no		1514308062	Allan Kleyson	UCzjtxsipnNDEPbZXqWv-fgQ	Science & Technology	7614	41	8	0.19512195121951	0	4
pvlaW0qVWp0	032 - Refutando e detonando Drauzio Varella	no		1511264274	Daniel Mota	UCqAjL4g0-FJ4-aocsfQZkZg	Education	254322	13838	924	0.066772655007949	0	1103
r7QMdUpsJYk	A ESTUPIDEZ HUMANA NÃO TEM LIMITE │ BOLSONARO OLAVO DE CARVALHO E NANDO MOURA │ HENRY BUGALHO	no		1539639663	Henry Bugalho	UCC6f63SXY0CDpsPGDBtTWVg	News & Politics	76003	9816	2850	0.29034229828851	0	2237
9CgSNudB_xM	Nando Moura NÃO CONSEGUE responder Normose e Pc Siqueira!!!	no		1544905925	Samuel Borelli	UC3gQ9lIiPQj7frT5CE5QyRA	People & Blogs	97181	12306	1459	0.11856005200715	0	1485
pT2scj9CrRY	OLAVO DE CARVALHO O TERRAPLANISTA?!	no		1559247655	Henry Bugalho	UCC6f63SXY0CDpsPGDBtTWVg	News & Politics	102641	9856	1702	0.17268668831169	0	1748
b4542x2sEH0	URGENTE: NANDO MOURA COMUNICA QUE VAI DEIXAR O YOUTUBE	no		1556989204	O Historiador	UC5ZXYxeWlROKbL7JziJ0bIQ	People & Blogs	30353	6278	183	0.029149410640331	0	822
s7WMXGIWU_w	A NOVA ESQUERDA SE LEVANTA	no		1544709683	Terça Livre TV	UC7qK1TCeLAr8qOeclO-s39g	News & Politics	56937	9710	116	0.011946446961895	0	615
787FkMbrZQs	ÁUDIO VAZADO CONFIRMA QUE GRANDE MÍDIA QUER ARRUINAR BOLSONARO?	no		1552390824	Daniel Lopez	UCpLR-q8rFLe_rEAXf4PRxRg	Entertainment	145783	28320	266	0.0093926553672316	0	2354
0RMCCTziPgU	Em busca de segurança na República Centro-Africana I 360º	no		1543948986	MSFBrasil	UCyG6SY3s8fS7ZKje6lv1JKg	Nonprofits & Activism	19287	34	3	0.088235294117647	0	2
CaGMP1rYWec	OLAVO DE CARVALHO x Paulo Ghiraldelli	no		1545320914	Italo Goulart	UC2m7CnTMT-AMH5w2IgBURnA	People & Blogs	18218	1702	511	0.30023501762632	0	622
svc24DI4OpI	Mensagem ao Olavo de Carvalho sobre a Terra Plana (Água Plana)	no		1559827695	ENZUH	UC9HT4JrbO6TSfjDHTzFgbPQ	News & Politics	30676	3873	588	0.15182029434547	0	548
GeQm5lVyOZ4	Paulo Kogos responde Debora G Barbosa: Terra plana e suas superstições gnósticas	no		1564355700	Libertarianismo	UCYmHuI1yrP_pkSsJlQRCi1g	People & Blogs	20954	1180	1092	0.92542372881356	0	1227
rZnWFQLwm34	DCM entrevista Sabrina Fernandes do canal Tese Onze	no		1545352914	Diário do Centro do Mundo	UCV2kagEmsbrO5lc6glH-8jA	News & Politics	14477	915	95	0.10382513661202	0	160
MBeRndOYyfc	Decisão de Toffoli mostra que Lula tinha razão: há covardes no STF	no		1545308797	Diário do Centro do Mundo	UCV2kagEmsbrO5lc6glH-8jA	News & Politics	6390	1084	72	0.066420664206642	0	125
b7dhVUVs8Ag	Terra plana 1 - Heliocentrismo o maior engano da humanidade	no		1466890904	MrRone43	UC-l4Sv-gy98g_NBasXEEcGg	Nonprofits & Activism	597133	14708	5463	0.37143051400598	0	5810
MDLmi-gj5hs	LULA vetou em 2010 vacina para meningite doença que matou seu Neto	no		1551527398	Canal Monarquia Livre	UCPkousjreAFvcwhywDmIzIQ	News & Politics	21198	492	115	0.23373983739837	0	168
1skyDepBVgU	A Farsa das Vacinas - Parte 1	no		1438346978	Psycho Mantis	UC5nLISkLI9zsaMHp4YBYTFw	News & Politics	1214	25	4	0.16	0	9
amwFWGMJhUw	Revolta da Vacina	no		1438630168	VideoSaúde Distribuidora da Fiocruz	UC5z5hsnZOZJH8vFacP-9poQ	Science & Technology	42829	563	22	0.039076376554174	0	17
CmeIvUpdX48	MMR Vaccine and Autism - The Children s Hospital of Philadelphia (7 of 10)	no		1258396475	The Children s Hospital of Philadelphia	UCCdnN4v9Fia0pjUzYlUBsGg	Science & Technology	10977				0
eaMu60BJqXw	新型インフルエンザ NYでワクチン接種はじまる（09/10/07）	no		1254884256	ANNnewsCH	UCGCZAYq5Xxojl_tSXcVJhiQ	News & Politics	127034	46	39	0.84782608695652	0
0z2XzdqAMVQ	Qual o perigo das vacinas? | Ponto em Comum Doc	no		1534860000	Ponto em Comum	UCGo3vjM2Ll3XujL-zYT5SMg	Education	40927	5620	59	0.010498220640569	0	403
IHDFTxQt3yk	Caminhos da Vacina | Documentário	no		1444741592	MSFBrasil	UCyG6SY3s8fS7ZKje6lv1JKg	Nonprofits & Activism	8431				0
phUmdyENIAY	Revolta da Vacina	no		1512475829	RESUMÃO	UCQpTamaG17Gi1wI2teLmJaA	Education	16342	654	7	0.010703363914373	0	15
jR-fkIlYog8	BrainScratch: Are Holistic Doctors Being Killed?	no		1458917327	LordanARTS	UCWoe_w-oadmQxcXZV2KMZgg	People & Blogs	26081	730	27	0.036986301369863	0	289
U-9NjPgU19Q	AUTISMO é uma possibilidade - MEU FILHO TEM 3 ANOS E AINDA NÃO FALA	no		1557692924	A Nossa Família por Juliana&Doda	UCsx_IzBUUYlR5f3lfRiXdIA	People & Blogs	953	38	2	0.052631578947368	0
pr1y7ddJfvc	Meu filho e autista...Minha experiencia como mae	no		1508334907	Hope In Jesus	UCHbGJ36_GFxqzZbWxqAn0zQ	People & Blogs	6527	192	6	0.03125	0	12
bDKZFR6gR4I	O Livro dos Médiuns #03: Introdução 2ª parte (por André Sobreiro)	no		1581129252	RAETV	UCKsGFyhL7_fDCEYN5jDYhew	Nonprofits & Activism	2879	335	10	0.029850746268657	0	6
0EYuH2mjBNw	Maria Valtorta - 148 - Figuras da Alma	no		1575284842	Andre Chilano	UC-v1PJRoid6DGFzY1jVU3hg	Nonprofits & Activism	578	64	1	0.015625	0	4
QPOCOylpqxM	Maria Valtorta - 152 - Vontade de Deus	no		1581336338	Andre Chilano	UC-v1PJRoid6DGFzY1jVU3hg	Nonprofits & Activism	122	26	0	0	0	7
-7-Q_slUnK0	Maria Valtorta - 149 - Selados no Amor	no		1575625252	Andre Chilano	UC-v1PJRoid6DGFzY1jVU3hg	Nonprofits & Activism	459	59	1	0.016949152542373	0	8
rQ3VyPdjofY	Mensagem de Maria Santíssima 23 - 11 - 2019	no		1574904516	Andre Chilano	UC-v1PJRoid6DGFzY1jVU3hg	People & Blogs	320	41	1	0.024390243902439	0	0
tpqhcuHY3VQ	Maria Valtorta - 150 - Chegada de Pedro	no		1575967435	Andre Chilano	UC-v1PJRoid6DGFzY1jVU3hg	Nonprofits & Activism	652	74	0	0	0	12
j5IuwVsn3yc	Lua e Monte Fuji com a camera Nikon P1000	no		1576330874	Andre Chilano	UC-v1PJRoid6DGFzY1jVU3hg	People & Blogs	342	44	0	0	0	4
buvo_dE2mo4	Documentário Sobre Vacinas - Parte 1	no		1545582268	4USA Florida	UCefDGwi8OyLaXnYRceTZjFg	News & Politics	1771	214	3	0.014018691588785	0	11
S-YJL3xJRfQ	Cruz de Krizevac	no		1579775243	Andre Chilano	UC-v1PJRoid6DGFzY1jVU3hg	Nonprofits & Activism	313	43	2	0.046511627906977	0	6
h90SpDvJt-8	Maria Valtorta - 147 - Erros do Mundo	no		1574476773	Andre Chilano	UC-v1PJRoid6DGFzY1jVU3hg	People & Blogs	598	72	0	0	0	6
b7-b4b2qL3A	Maria Valtorta -151- Encontro em Tiberíades	no		1581065767	Andre Chilano	UC-v1PJRoid6DGFzY1jVU3hg	Nonprofits & Activism	237	41	0	0	0	10
fo5aIKQQq9I	Desligai-vos	no		1579853471	Andre Chilano	UC-v1PJRoid6DGFzY1jVU3hg	Nonprofits & Activism	242	34	2	0.058823529411765	0	0
hUujry553Z0	Mensagem de Maria Santíssima 24-11-2019	no		1575115536	Andre Chilano	UC-v1PJRoid6DGFzY1jVU3hg	Nonprofits & Activism	312	35	0	0	0	1
tzwTyUnG3qI	Mensagem de Jesus 21-11-2019	no		1574779897	Andre Chilano	UC-v1PJRoid6DGFzY1jVU3hg	People & Blogs	537	60	2	0.033333333333333	0	16
NLUJfjzLyX4	Chegada de Maria	no		1578478572	Andre Chilano	UC-v1PJRoid6DGFzY1jVU3hg	Nonprofits & Activism	446	55	3	0.054545454545455	0	12
-HLgTsVHVHc	Maria Valtorta - 144 - Amor e Perdão	no		1573527647	Andre Chilano	UC-v1PJRoid6DGFzY1jVU3hg	People & Blogs	540	64	1	0.015625	0	3
C0EoxZr9qxs	Maria Valtorta - 145 - Sortes Diversas	no		1573783116	Andre Chilano	UC-v1PJRoid6DGFzY1jVU3hg	People & Blogs	504	60	2	0.033333333333333	0	10
le0O9_e9UX4	Incógnitas de Francisco	no		1577440340	Andre Chilano	UC-v1PJRoid6DGFzY1jVU3hg	Nonprofits & Activism	467	26	12	0.46153846153846	0	29
YO_gDngP8hg	Depoimento Dr. Plotkin...Uso de fetos humanos em pesquisas.	no		1559769402	Fantástico Mundo De Dani	UCaOeb8m3J2H5bLScFDpyq4w	News & Politics	468	27	2	0.074074074074074	0	0
JjZAvRXOPx0	#66º de 777 ✅ A todas as #lésbicas: #VIDALOKA! Todos nós somos BI? O Delta: #Homo #Hetero e #Pan!	no		1581132503	AKEL ESCOLA de Jesus Cristo & Universidade EX	UCxG1mll0wS-Q_ZvQ8rJuqag	News & Politics	15574	1121	73	0.065120428189117	0	98
sznmQ_2kuxA	Robert de Niro e as vacinas	no		1573212767	Nunca te contaram TV	UCYMzwx5ov-dgB_sB6FHvNZQ	People & Blogs	353	56	4	0.071428571428571	0	26
9xjyddfMR5Q	Family points to Gardasil vaccination after daughter s health decline	no		1469055296	WJBF	UCbHRDtYcy75lsoRdZ2h_24A	News & Politics	32093				0	189
glu_Z_w2hLg	Kelly - filme em portugues	no		1462666933	Joy Arthur	UC9coa4eWvwznczn6P-RXLwQ	People & Blogs	7337	31	10	0.32258064516129	0	0
8kAzfN-JRGA	Sonya Pemberton - Jabbed: Love Fear and Vaccines	no		1371533689	ConvergenceScienceNetwork	UCHvDONQK4hL1_7sgIMg0iPQ	Science & Technology	9151	32	8	0.25	0	24
VJqY2WYXQB4	[ VACINAS ] QUER SABER MAIS VEJA ESSE VÍDEO	no		1519320186	Em Busca da Verdade	UCKFKv33ofAtflmz0C-TKnQA	News & Politics	316	28	1	0.035714285714286	0	1
EjOz6YO4Zks	Vacina sao sim perigosas!	no		1531615786	niedja lopes	UCBbDQqY8W_ZwffWWqjyRbXQ	People & Blogs	33	1	0	0	0	1
EOYpbAMGKKA	VOCÊ É CONTRA A VACINAÇÃO? Vacinar ou NÃO? Você Foi Vacinado? Tomou Quais Vacinas? Comente	no		1564792471	SAÚDE PERFEITA COM KIKO DO BEM	UCckVaSXWw4Zbe_Sz_SUwhBw	Entertainment	588	114	10	0.087719298245614	0	36
bBxxqEn4Jbg	Rebobina Aí! (07-02-20)	no		1581100132	UFLA	UCz54U1Ts7JR7ZtSiClcVOOw	Education	139	8	0	0	0	0
ekdL9HEiltY	Pretensão salarial	no		1576525835	UFLA	UCz54U1Ts7JR7ZtSiClcVOOw	Education	83	6	0	0	0	0
7DYCYhjzhdg	O que é meningite meningocócica?	no		1551473237	Record News	UCuiLR4p6wQ3xLEm15pEn1Xw	News & Politics	27863	458	22	0.048034934497817	0	27
X8rYlTiwowc	Ginecologista fala sobre o citomegalovírus e outros temas; confira	no		1543945592	Ver Mais Londrina	UCGfBE94turq_hyKMxB-Dfrg	People & Blogs	14445	218	14	0.064220183486239	0
hkX12U8ULco	TUDO SOBRE CATAPORA E SEUS SINTOMAS | MACETES DE MÃE	no		1537538410	Macetes de Mãe	UCTrx5uG9vJjTLloAH8hE-pg	People & Blogs	120336	3055	125	0.040916530278232	0	206
5U9XSnGycD0	TOMEI A VACINA DA FEBRE AMARELA GRÁVIDA	no		1529505408	clica que é dica	UCh897BiM_CQJtK2gL29tYSg	People & Blogs	2737	164	0	0	0	30
44yG50SRxpQ	RJ: 36 27% das crianças tomaram vacina para pólio e sarampo	no		1535125784	Band Jornalismo	UCoa-D_VfMkFrCYodrOC9-mA	News & Politics	342	6	1	0.16666666666667	0	2
Hp9M8uAibPk	Sarampo: Vacinação para bebês a partir de 6 meses começa nesta quinta	no		1566469193	Jovem Pan News	UCP391YRAjSOdM_bwievgaZA	News & Politics	5978	51	8	0.15686274509804	0	2
9_Wsk8cCezo	Guerra contra o sarampo: saiba como funciona o bloqueio vacinal	no		1564440754	Jornal da Gazeta	UCNl_i-ggJbZNyOLlhE7yyhw	News & Politics	4151	35	1	0.028571428571429	0	0
sseyQLmtIS4	Quais são os cuidados com a rinite na gestação? | Momento Papo de Mãe	no		1544173206	Papo de Mãe TV Cultura	UCQdOZmbeT9UoQy8G3zeNE-g	Entertainment	5663	177	4	0.022598870056497	0
4a44xhw-u9g	SURTO DE SARAMPO. Veja se você precisa se vacinar	no		1563808792	Morning Show	UC-wcdrzucnlKGBjyEUaEWaQ	News & Politics	22211	814	152	0.18673218673219	0	330
tMtyCdNGLpU	Vacina Pentavalente (Penta) - Aula Completa (Profa. Juliana Mello)	no		1554401799	ENFrente Enfermagem Continuada	UCD9kk0EUEtflrRl6TV0lDyA	Education	4851	391	1	0.0025575447570332	0	10
BZF1ypWMLtI	Tudo sobre surto de coqueluche em Cachoeira do Sul	no		1517937562	TV Cachoeira Novo Tempo	UCgSIQgFmDXYUB-oDsrNifiQ	People & Blogs	5378	102	7	0.068627450980392	0	4
IR1dMY45RkM	Campanha de Vacinação contra o Sarampo - Dia D	no		1570282723	Ministério da Saúde	UC12zKGLhMhDeDidoctM6BrA	Nonprofits & Activism	6143	57	1	0.017543859649123	0	2
YwiOVQkQC_0	24 HORAS COM A GENTE | VACINA DE 2 MESES | REAÇÕES	no		1542464996	Jéssica Gomes	UCL0sWgefmtjUNvtBafXQmhA	People & Blogs	9612	380	10	0.026315789473684	0	27
YgouSdI-Mbk	Heteroidentificação	no		1580480505	UFLA	UCz54U1Ts7JR7ZtSiClcVOOw	Education	283	12	0	0	0	0
ImEvMtfAh4c	Doenças exantemáticas | UniCEUB	no		1560307732	MEDICINA COMPLETA	UCqvGEQ2q-gScRQpl158SAfQ	People & Blogs	2560	109	5	0.045871559633028	0	5
VkZOlg8_4UY	O Que é Flebite e como identificar ?	no		1555246814	Blog Experiências de um Técnico de Enfermagem	UCsGzj2UYih1rr91iuFVPKiQ	Education	15603	891	8	0.0089786756453423	0	55
NTY1WZcPv4Q	✅ O que é infecção no sangue como identificar e tratar!	no		1567807200	Naturais - Cura Natural	UCooHPZW1y9nswIiZuA0EORw	People & Blogs	6617	267	6	0.02247191011236	0	2
68LGq1kIAQU	Os 10 Remédios Caseiros Para Tratar Sarampo	no		1529660749	Brazil Heath	UCAAqC3FgQfWxu_ui-1gynzQ	People & Blogs	5970	105	9	0.085714285714286	0	3
vyPEMomBaaA	Sarampo na Gravidez	no		1532018396	Conseils de famille	UCdWWan__ZRGzfVZ81nfE3KA	People & Blogs	600	0	7		0	0
f8_gxJ7me2E	NA MINHA CASA NINGUÉM COME PÃO!!! E Como Se Alimentar Corretamente!!! (Lair Ribeiro)	no		1511613609	SAÚDE & BEM ESTAR	UCe1XNXkGImWSq5n4wkzNjBw	People & Blogs	1027437	52495	1027	0.019563767977903	0	1322
K9v0sKgYINs	QUAIS SÂO OS PRINCIPAIS SINTOMAS DA FEBRE AMARELA?	no		1517492584	Dr. Lair Ribeiro Oficial	UCk9mgpQVdJ5oKQWkM1UPBaQ	Entertainment	22155	637	19	0.029827315541601	0	24
WE5f1ZbmCz4	Daniel Mastral - Satanismo Oculto	no		1552595501	Daniel Mastral	UCcyrEfqNzo1AWnC_PPA4rzw	Education	133632	9596	157	0.016360983743226	0	14
zf9AiO6KhCM	O alimento que blinda a sua próstata	no		1543852228	Dr. Lair Ribeiro Oficial	UCk9mgpQVdJ5oKQWkM1UPBaQ	Entertainment	3231690	113269	3332	0.029416698302272	0	2991
bJRzf-ks5WU	🔴 Dr. Lair Ribeiro tema - Quem nasceu POBRE pode ficar RICO ? O que é alto estima ?	no		1470132928	prosperidadeshop	UCol52xtoFqjdeW2t-JvLkeQ	Education	228946	12137	217	0.017879212325945	0	367
JaMDUQyG0as	DEVO OU NÃO ME VACINAR CONTRA GRIPE? (Tiago Rocha)	no		1493939645	Palestrante Tiago Rocha	UCfMqB9cB9RfC1r2CMPnYDNw	People & Blogs	154111	9528	209	0.021935348446683	0	491
v6DWGPNjNIg	Mude Sua Alimentação Mude Sua Vida | Hangout com Dr. Lair Ribeiro	no		1441060923	Dr. Lair Ribeiro Oficial	UCk9mgpQVdJ5oKQWkM1UPBaQ	Education	768512	23321	866	0.037133913640067	0	895
oQDzqTQAIJk	ÁGUA ALCALINA Aprenda a Fazer Com o Sal Marinho!!! (Lair Ribeiro)	no		1484165234	SAÚDE & BEM ESTAR	UCe1XNXkGImWSq5n4wkzNjBw	People & Blogs	1518906	52631	1525	0.028975318728506	0	1289
nj7o3hgAvLg	CAUSAS DAS MANCHAS DE PELE Saiba Como ELIMINÁ-LAS!!! Vitamina D3 e o Sabonete (Lair Ribeiro)	no		1484497470	SAÚDE & BEM ESTAR	UCe1XNXkGImWSq5n4wkzNjBw	People & Blogs	878298	29033	644	0.022181655357696	0	848
Oilh5XR8ygA	OS 7 MELHORES ALIMENTOS DO MUNDO!!! (Lair Ribeiro)	no		1481389692	SAÚDE & BEM ESTAR	UCe1XNXkGImWSq5n4wkzNjBw	People & Blogs	305125	16929	235	0.013881505109575	0	284
ex1UK1nShFI	Vamos falar sobre febre amarela com dr. Esper Kallás | Ao Vivão #05	no		1516280404	Drauzio Varella	UC9zqTTVeClpqMQ5CLuJdWtw	Science & Technology	101500	5403	158	0.029243013140848	0	451
3gSsIAOeIqE	🔴 COMA CARBOIDRATOS SEM ABSORVER!!! Saiba Como Nesse Vídeo!!! Dr. Lair Ribeiro E A Dieta Cetogênica	no		1566048069	SAÚDE & BEM ESTAR	UCe1XNXkGImWSq5n4wkzNjBw	People & Blogs	287767	20300	235	0.011576354679803	0	474
yLA47iqQU2E	TESTOSTERONA!!! Saiba Os Seus Benefícios!!! (Lair Ribeiro)	no		1504356812	SAÚDE & BEM ESTAR	UCe1XNXkGImWSq5n4wkzNjBw	People & Blogs	216254	7310	199	0.027222982216142	0	175
EKkWEuD5m_I	ABACATE	no		1572523777	Dr. Lair Ribeiro Oficial	UCk9mgpQVdJ5oKQWkM1UPBaQ	Entertainment	40064	4091	16	0.0039110241994622	0	72
IbRFprrRmXg	🔴 AÇÚCAR MASCAVO E AMENDOIM Brasileiros Estão Contaminados??? Dr. Lair Ribeiro E O Detox Eficiente!	no		1561208634	SAÚDE & BEM ESTAR	UCe1XNXkGImWSq5n4wkzNjBw	People & Blogs	55220	3864	48	0.012422360248447	0	185
Dg4-yopvINU	Saiba quem não deve tomar a vacina contra a Febre Amarela	no		1485869403	PUC TV GOIÁS	UCBx_CluVFNvy0TXsmNBZ-ow	News & Politics	41124	262	28	0.10687022900763	0	45
Jnpq79oLquw	POSSO TOMAR VIINHO TINTO	no		1575398506	Dr. Lair Ribeiro Oficial	UCk9mgpQVdJ5oKQWkM1UPBaQ	Entertainment	34811	3888	28	0.007201646090535	0	227
lMGjkkt6JL0	COMO ATINGIR UM SONO REPARADOR?	no		1581092101	Dr. Lair Ribeiro Oficial	UCk9mgpQVdJ5oKQWkM1UPBaQ	Entertainment	5612	735	4	0.0054421768707483	0	0
5rWaCLTWJwE	ONDE ENCONTRAR AS RESPOSTAS?	no		1574779433	Dr. Lair Ribeiro Oficial	UCk9mgpQVdJ5oKQWkM1UPBaQ	Entertainment	10437	1632	6	0.0036764705882353	0	41
-VCx5bThG2M	QUALÉ O MELHOR DOS ÓLEOS PARA COZINHAR?	no		1578405537	Dr. Lair Ribeiro Oficial	UCk9mgpQVdJ5oKQWkM1UPBaQ	Entertainment	30976	2949	20	0.0067819599864361	0	1
5OwdM6q22JA	🔴 Porque NÃO Devemos Usar AZEITE DE OLIVA Brasileiro? E A Pílula Da Inteligência! Dr. Lair Ribeiro	no		1563627972	SAÚDE & BEM ESTAR	UCe1XNXkGImWSq5n4wkzNjBw	People & Blogs	44556	3674	51	0.013881328252586	0	186
4lWjrOEp6FA	Super Vacina Natural Contra a Gripe Dr Lair Ribeiro	no		1535494305	O Melhor Para Você	UCVPdtCCsEsem4hyVwS_GzOQ	People & Blogs	164693	11400	119	0.010438596491228	0	272
daKxfWOjz7M	MINHA AULA DEFINITIVA SOBRE O ÓLEO DE COCO	no		1536246485	Dr. Lair Ribeiro Oficial	UCk9mgpQVdJ5oKQWkM1UPBaQ	Entertainment	420522	33731	370	0.010969138181495	0	1711
2t11sQtmesY	COMO TER INTESTINO SAUDÁVEL!!! LAIR RIBEIRO RESPONDE!!! #DrLairRibeiro	no		1515236155	SAÚDE & BEM ESTAR	UCe1XNXkGImWSq5n4wkzNjBw	People & Blogs	780209	30234	807	0.026691803929351	0	619
VItTyNMP_xg	Diabetes e Obesidade | Hangout com Dr. Lair Ribeiro	no		1459440879	Dr. Lair Ribeiro Oficial	UCk9mgpQVdJ5oKQWkM1UPBaQ	Education	507120	12011	447	0.037215885438348	0	555
CgLG-SsQUUM	TRATAR DEPRESSÃO SEM REMÉDIOS (EMT) - ALZHEIMER E AMNÉSIA | Dr Lair Ribeiro	no		1568746705	Junior Hallak Medicina e Saúde	UCPR3gVNYBzi-02_O4noC1Zg	Science & Technology	58997	5388	55	0.010207869339272	0	178
1ecPR4UjOXc	DORMIR NO ESCURO FAZ DIFERENÇA?	no		1576975843	Dr. Lair Ribeiro Oficial	UCk9mgpQVdJ5oKQWkM1UPBaQ	Entertainment	25992	3739	18	0.0048141214228403	0	149
nq214q1RusY	Lair ribeiro Vitamina D3 A Vacina Contra O Cancer	no		1420297019	Cizio Oliveira	UCB64lmy3pK38sjYIVjiZN8A	People & Blogs	30048	994	11	0.011066398390342	0	33
YPzn-prP7go	3 Alimentos que você não deve comer de jeito nenhum! Nunca! | Dr. Marco Menelau Live #5	no		1571959097	Dr. Marco Menelau	UCGbDaS58FGh45Oq4N-Qfhdw	Science & Technology	43005	6124	81	0.013226649248857	0	222
ZrreJeV_-HQ	Saiba quem não deve tomar a vacina contra febre amarela	no		1516364816	SP no Ar	UCQKBmUf2GZUXRQFpzCPN5og	News & Politics	76973	590	64	0.10847457627119	0	111
16AslDPO9Mk	🔴 Essa Planta PODEROSA FARÁ VOCÊ VIVER MAIS!!! E O Melhor Café Para Saúde!!! Dr. Lair Ribeiro	no		1564237484	SAÚDE & BEM ESTAR	UCe1XNXkGImWSq5n4wkzNjBw	People & Blogs	98288	6685	90	0.013462976813762	0	166
imGy8-Iowf8	10 motivos para você tomar Ômega 3	no		1507298303	Dr. Lair Ribeiro Oficial	UCk9mgpQVdJ5oKQWkM1UPBaQ	Entertainment	293421	9106	187	0.020535910388755	0	454
Euz_ue1S3Bk	O PODER DA EPIGENÉTICA	no		1578685725	Dr. Lair Ribeiro Oficial	UCk9mgpQVdJ5oKQWkM1UPBaQ	Entertainment	16500	2196	17	0.0077413479052823	0	0
uxLKKJCFD8o	Esqueça o cálcio e saiba como prevenir a Osteoporose. (DR. LAIR RIBEIRO)	no		1537404596	nutrição Alimentos & Cia	UCQNi2fXhCHRu8-b-w29SMCA	Education	580904	44514	1051	0.023610549490048	0	1284
qpURpgwnVdk	COMO PAREI DE GRIPAR? ACHEI A CURA DA GRIPE!!	no		1511147387	Tati Braga	UCgrLZ1vLKak20iMSxK13C9w	People & Blogs	273592	13353	1387	0.10387178911106	0	403
F8D3xa6gBck	5G é pior do que VC pode IMAGINAR | Dr Lair Ribeiro	no		1560134150	U MIÓ QUE TÁ TENO	UC4F32QLrpDmmRrozxr9z59g	Science & Technology	947400	55143	1876	0.034020637252235	0	4669
pNztY2hcMzc	CUIDADO Se VC está acordando sem ereção matinal | Benefícios da testosterona| Dr Lair	no		1555276292	U MIÓ QUE TÁ TENO	UC4F32QLrpDmmRrozxr9z59g	Science & Technology	367471	19388	254	0.013100887146689	0	1077
1GVELUEQO10	Faz MAL e te ENVELHECE 7X MAIS | Dr Lair Ribeiro	no		1521497015	U MIÓ QUE TÁ TENO	UC4F32QLrpDmmRrozxr9z59g	Science & Technology	1316663	53201	1513	0.028439315050469	0	2302
QUjveRwc4dc	COMO usar ÁGUA E SAL como REMÉDIO PARA DOR | Dr Lair Ribeiro	no		1543431830	U MIÓ QUE TÁ TENO	UC4F32QLrpDmmRrozxr9z59g	Science & Technology	527280	34905	431	0.012347801174617	0	2243
kwp1L3gL6CA	E quem bebe café o dia inteiro? - Remédio que pode causar Alzheimer precocemente 《Dr. Lair Ribeiro》	no		1567733551	U MIÓ QUE TÁ TENO	UC4F32QLrpDmmRrozxr9z59g	Science & Technology	466147	33064	396	0.011976772320348	0	1913
eTHXlDxqtoM	Mastigue cravo da Índia e veja o que acontece com seu metabolismo e com a sua tireóide	no		1559521664	Dr. Dayan Siebra	UClN6OLbLp1YjTSwDOkEM2dA	Entertainment	155643	24655	188	0.0076252281484486	0	1414
7i3Ww0k8VxY	Ovo voltou a ser vilão? Não acredito!! | Dr. Dayan Siebra	no		1554253496	Dr. Dayan Siebra	UClN6OLbLp1YjTSwDOkEM2dA	Entertainment	121641	22309	303	0.013581962436685	0	1328
KdCCbazbKAI	⚠️VEJA A VERDADE POR DETRÁS DA VACINA DA FEBRE AMARELA | Hangout Dr Lair Ribeiro.	no		1517357689	U MIÓ QUE TÁ TENO	UC4F32QLrpDmmRrozxr9z59g	Science & Technology	112039	6897	186	0.026968247063941	0	398
CfhqdizHApM	Tomando vacina febre amarela. Escandalosa??!! Euuuuu??????	no		1491421826	Isabela Soares	UCrSYAKKH6gYD04KA-0ZkLAQ	Entertainment	11009801	63956	12334	0.19285133529301	0
Q3JTuzpHsh8	Abra o olho com Dr.Lair Ribeiro	no		1508358572	Markingguitar	UCeYMquYSGFQ6ryJQ1QWxn6w	Music	1055589	43007	4165	0.096844699700049	0	4099
SQpVUYjwRW8	A morte de Marcelo Rezende - Dr Lair Ribeiro merece respeito! Dieta cetogênica e quimioterapia	no		1505753354	O NATURAL É MELHOR	UCwQhAc44SfDvhdCQiHluBVQ	People & Blogs	857692	36245	1865	0.051455373154918	0	2525
3joN57BORlg	OS MALES CAUSADOS PELA DEFICIÊNCIA DE VITAMINA B12 | Dr Lair Ribeiro	no		1539053808	U MIÓ QUE TÁ TENO	UC4F32QLrpDmmRrozxr9z59g	Science & Technology	280202	18447	221	0.011980267794221	0	1107
LW1lfsP_JIY	Dr Lair REVELA PQ ele usa AGUÁ morna COM LIMÃO no Jantar	no		1551374758	U MIÓ QUE TÁ TENO	UC4F32QLrpDmmRrozxr9z59g	Science & Technology	1060739	65922	853	0.012939534601499	0	3847
AhQMDLstpRo	💊 O REMÉDIO QUE DEIXA BURRO E ENVELHECE O CÉREBRO EM 10 ANOS | Dr Lair Ribeiro	no		1546208885	U MIÓ QUE TÁ TENO	UC4F32QLrpDmmRrozxr9z59g	Pets & Animals	290506	15583	281	0.018032471282808	0	1061
s3Z0Y9Nx84g	Comentários Idiotas #15 - Dr. Drauzio Varella	no		1487967328	Argumentos Veganos	UCLJM5tW9y0KpbKo-F7-kGEQ	Nonprofits & Activism	258983	6537	2215	0.33884044668808	0	1357
-FayqngQ5sE	OLHA os males causados pelo óleo de coco Eu e a ABRAM estamos errados? Fernando Lemos x Dr Lair	no		1548786850	U MIÓ QUE TÁ TENO	UC4F32QLrpDmmRrozxr9z59g	Science & Technology	232851	13170	710	0.053910402429765	0	4807
yLpVxzmlj0o	Febre amarela- Tive reações da vacina	no		1516828976	Paulo Andrady	UCDgyuBDJGp5TlDMubeI-QdQ	People & Blogs	14346	114	16	0.14035087719298	0	158
zKyyrvs6S4I	Mais uma possível causa do autismo	no		1516452525	Pesquisa Fapesp	UCYhTgGdeaBbbZ-h_LVJ_6bw	Science & Technology	5031	208	3	0.014423076923077	0	1
O9TsDPP-7os	Finalmente descobriram o VERDADEIRO PROPÓSITO das pirâmides do Egito?	no		1533243601	Mundo Desconhecido	UChsb03kH_dNRh2-wE8GkeaA	Entertainment	2412000	82935	3699	0.044601193705914	0	2866
_1ni1LdLNNI	Misterioso Planeta Solitário é Detectado Além do Sistema Solar | AstroPocket News	no		1533340269	Canal do Schwarza	UCWq1xltHB2fDe6YkYoOrryg	Entertainment	62314	9868	67	0.0067896230239157	0	683
nft23JomQIU	Há um Novo Híbrido de Planeta e Estrela no Espaço | AstroPocket News	no		1533949795	Canal do Schwarza	UCWq1xltHB2fDe6YkYoOrryg	Entertainment	34897	6463	34	0.0052607148383104	0	195
Z4BqwLexRQ4	É Possível Disparar Armas no Vácuo do Espaço? A Bala Ficaria Orbitando a Terra? | AstroPocket	no		1533077009	Canal do Schwarza	UCWq1xltHB2fDe6YkYoOrryg	Entertainment	92611	13881	167	0.012030833513436	0	458
uBYb3834lF0	Colisão de 2 Estrelas Resolve Mistério de Décadas | AstroPocket News	no		1533172373	Canal do Schwarza	UCWq1xltHB2fDe6YkYoOrryg	Entertainment	35259	6237	44	0.0070546737213404	0	173
RQ9oa42XUc0	A Verdadeira Razão de Existirem Canhotos (E não Tem a Ver com o Cérebro) | AstroPocket	no		1532984405	Canal do Schwarza	UCWq1xltHB2fDe6YkYoOrryg	Entertainment	86351	12290	145	0.01179820992677	0	1157
E1pIOT1EfEw	Conheça a Luz Líquida: O Quinto Estado da Matéria | AstroPocket	no		1533597653	Canal do Schwarza	UCWq1xltHB2fDe6YkYoOrryg	Entertainment	104562	18290	191	0.010442864953527	0	553
gVxrfKa6Gm0	Cientistas Descobrem que Pirâmide do Egito Foca Energia Eletromagnéticas | Lenda ou Fato	no		1533848401	Canal do Schwarza	UCWq1xltHB2fDe6YkYoOrryg	Entertainment	62950	9109	109	0.011966187287298	0	333
NZ2RIqu0Ais	Relógio do Juízo Final Marca 100 Segundos para o Fim do Mundo e isso não é Nada Bom	no		1580855830	Canal do Schwarza	UCWq1xltHB2fDe6YkYoOrryg	Entertainment	79554	12909	278	0.021535362925091	0	1034
vO397PzkM90	Descoberto Misterioso Planeta Solitário - Space Today TV Ep.1397	no		1533345578	SpaceToday	UC_Fk7hHbl7vv_7K8tYqJd5A	Science & Technology	38279	6634	39	0.0058788061501357	0	514
qiXkOaEk2n8	Veja um Vídeo Incrível em Time-Lapse de Explosão em Supernova | AstroPocket News	no		1532989501	Canal do Schwarza	UCWq1xltHB2fDe6YkYoOrryg	Entertainment	26816	4772	23	0.0048197820620285	0	72
3QczwZLJM3s	Eram Os Deuses Astronautas? - A Vida na Terra veio de Marte? | 5 Mistérios Sem Solução	no		1463580000	Canal do Schwarza	UCWq1xltHB2fDe6YkYoOrryg	Entertainment	216356	17226	618	0.035876001393243	0	1340
54s8w7AVyj4	Por que o Espelho Inverte da Esquerda para Direita mas não Cima/Baixo? | AstroPocket	no		1533675601	Canal do Schwarza	UCWq1xltHB2fDe6YkYoOrryg	Entertainment	42983	8258	115	0.013925890046016	0	372
EQf9tXmyC5A	HISTÓRICO: Lago Com Água Líquida é Encontrado em Marte! | AstroPocket News	no		1532563825	Canal do Schwarza	UCWq1xltHB2fDe6YkYoOrryg	Entertainment	76974	12226	89	0.007279568133486	0	619
Fnu8DEU1zmc	É Hoje: Maior Aproximação de Marte em 15 Anos! Saiba como Observar | AstroPocket News	no		1533086420	Canal do Schwarza	UCWq1xltHB2fDe6YkYoOrryg	Entertainment	36362	6040	36	0.0059602649006623	0	389
SyzVO8EO2v0	Se Seu Cérebro Fosse um HD Quantos Filmes Caberiam Nele? | AstroPocket	no		1534974985	Canal do Schwarza	UCWq1xltHB2fDe6YkYoOrryg	Entertainment	69528	12640	87	0.0068829113924051	0	473
TN-qI6uCidY	Radiotelescópio Capta Sinal de Radio Não Identificado Vindo do Espaço | AstroPocket News	no		1533256596	Canal do Schwarza	UCWq1xltHB2fDe6YkYoOrryg	Entertainment	55451	8534	72	0.0084368408718069	0	350
1RaOEwPV4ns	Detectado Um Dos sinais Mais Misteriosos do Universo - Space Today TV Ep.1398	no		1533387600	SpaceToday	UC_Fk7hHbl7vv_7K8tYqJd5A	Science & Technology	64374	10434	60	0.0057504312823462	0	1053
ZCK_k9HPrD0	Câmera Consegue filmar a 1 TRILHÃO de Quadros por Segundo e Registra Fenômenos Invisíveis	no		1579649141	Canal do Schwarza	UCWq1xltHB2fDe6YkYoOrryg	Entertainment	58671	8950	180	0.020111731843575	0	334
j-ojDy-GBn4	É Possível Criar Gravidade Artificial? | AstroPocket	no		1534891074	Canal do Schwarza	UCWq1xltHB2fDe6YkYoOrryg	Entertainment	51719	9411	83	0.0088194665816598	0	404
aHQPk8a25dE	Cometa PanSTARRS C/2017 s3 Possui 2 Vezes o Tamanho de Júpiter? | Lenda ou Fato	no		1532638801	Canal do Schwarza	UCWq1xltHB2fDe6YkYoOrryg	Entertainment	47738	7795	77	0.0098781270044901	0	351
mu8pkIvePgo	O Tempo está Desacelerando e irá PARAR Completamente um Dia diz Estudo | AstroPocket	no		1532552403	Canal do Schwarza	UCWq1xltHB2fDe6YkYoOrryg	Entertainment	66611	12190	115	0.0094339622641509	0	639
e2ipK1R9paI	Lua de Júpiter Emite um Poderoso som de Apito | AstroPocket News	no		1533863529	Canal do Schwarza	UCWq1xltHB2fDe6YkYoOrryg	Entertainment	35847	6424	54	0.0084059775840598	0	187
V-GKt5NoSR8	Está Ficando IMPOSSÍVEL de Ver Estrelas no Céu	no		1533567606	Ciência Todo Dia	UCn9Erjy00mpnWeLnRqhsA1g	Science & Technology	173759	28905	122	0.0042207230582944	0	937
C8bzjWmEE0g	Mais de 100 mil Pessoas Viram OVNIs no Maior Avistamento dos EUA!	no		1533484800	AssombradO.com.br	UCIirjo8OWJBMLfV_peBD6RQ	Entertainment	142787	16735	194	0.011592470869435	0	838
b6oXhwUtd7E	Podemos ter Encontrado Evidências de Universos Anteriores ao Nosso | Fora da Caixa	no		1534542721	Canal do Schwarza	UCWq1xltHB2fDe6YkYoOrryg	Entertainment	62652	10568	101	0.009557153671461	0	494
dSU3LZA9PeA	Veja Como uma TV Funciona em Camera Ultra Lenta (380.000 Quadros por Segundo) | AstroPocket	no		1533157201	Canal do Schwarza	UCWq1xltHB2fDe6YkYoOrryg	Entertainment	220489	19141	561	0.029308813541612	0	400
-07Td55IS_4	Como meu filho saiu do autismo moderado para o autismo leve	no		1520268981	Kenya Diehl	UCilO3ZOPdzgmccJg_NpJ5XA	People & Blogs	41447	3078	66	0.021442495126706	0	267
tOhQGHoCUQE	O Brasil Está Fadado ao FRACASSO | Fora da Caixa	no		1533319366	Canal do Schwarza	UCWq1xltHB2fDe6YkYoOrryg	Entertainment	37223	8653	81	0.009360915289495	0	863
we_Ov9fuiUU	Autismo e Grandes Cientistas A História de Henry Cavendish	no		1444457997	Leila Maria Felix	UCBrf8ddDbkt70nWkJHlc42A	People & Blogs	390	13	0	0	0	1
UZdn-xCzgy8	O EVENTO está chegando explicando o que é p/SANANDA	no		1521045787	ESSENCIA AYAM EU SOU Espiritualidade	UCfwxLOjkmp3gSEB2KCYhOlw	Education	201830				0	450
J6ThvX-DGPo	SONO E TRANSTORNO DO ESPECTRO AUTISTA	no		1570568402	CBI of Miami	UCuAaB8lLRmoZzOrc_d_Ka0A	Education	854				0	7
7HVNlruabDI	EPIDEMIA DE AUTISMO?	no		1580850000	CBI of Miami	UCuAaB8lLRmoZzOrc_d_Ka0A	Education	299				0	4
KwxsnCD0m8k	BRINQUEDOS QUE ESTIMULAM A LINGUAGEM	no		1576616402	CBI of Miami	UCuAaB8lLRmoZzOrc_d_Ka0A	Education	349				0	0
Cnna7NiVh90	ALFABETIZAÇÃO: Evidências científicas do aprendizado | NeuroSaber	no		1423610139	NeuroSaber	UCghJZXv-Cg90zgdeTZCt_-A	Entertainment	22836	910	18	0.01978021978022	0	47
rloNvRuzwzE	Matéria Síndrome de Asperger no Fantástico	no		1168998377	Luis Andrade	UC1ToYrGtIHCpTA1FtJ-x0Lw	Howto & Style	523714	2591	332	0.12813585488228	0	375
8-OWRAp7qe4	QUANDO BUSCAR AJUDA PARA A CRIANÇA?	no		1539700912	CBI of Miami	UCuAaB8lLRmoZzOrc_d_Ka0A	Education	1568				0	5
A6wwYaDQuZY	5 DICAS DE SITES PARA ESTUDAR!	no		1562706000	CBI of Miami	UCuAaB8lLRmoZzOrc_d_Ka0A	Education	573				0	5
m2pQrSCig5c	Cachos Soltos e Definidos fazendo Twist | CABELO CRESPO E CACHEADO DE CRIANÇA| Canal Afrokids	no		1472851801	Afrokids	UCBbpXCnWttleSMNWTAo5oQw	People & Blogs	320690	8280	372	0.044927536231884	0
LO6cb3dFtO8	Relato da mãe de um autista - Emocionante	no		1511959431	Marcio Pacheco	UCa-E_TdolbgVpKNpCsw9QjQ	News & Politics	21262	900	19	0.021111111111111	0	58
qX9kATOnXnA	MMS tratamentos alternativos e perda do diagnóstico - AUTISMO - Thiago Lopes - EP#65	no		1559941093	Instituto Farol - Autismo	UCzTpvt8Wv6ODw4nl_6IDpjQ	Education	6013	912	47	0.051535087719298	0	82
vjlREDipKe4	A CURA DO AUTISMO - RESPOSTA RÁPIDA	no		1467297048	Mayra Gaiato	UC42k7FI53tnSSIjgzW-rbLA	Education	38662	2079	127	0.061087061087061	0	272
Gh04GAhOKvw	O que é autismo?	no		1384897151	Os heróis da Lua	UC7vm7VeoQ_q7i6h_FjYkHuQ	People & Blogs	157139	3664	308	0.084061135371179	0	309
poxteia-WD0	Dietas no Tratamento do Autismo - Por Nutricionista Priscila Spiandorello	no		1335795558	Congresso de Autismo	UC-er6TPk2_XAfbSz-mPs3-A	Education	41959	738	33	0.044715447154472	0	50
3wlRr3JNw-4	Comunicado Oficial Dr. Lair Ribeiro	no		1489502209	Dr. Lair Ribeiro Oficial	UCk9mgpQVdJ5oKQWkM1UPBaQ	Entertainment	34974	2819	18	0.0063852429939695	0	186
W_mhjKLsnsk	Jo Soares TDAH(DDA) - Ana Beatriz Silva	no		1231434331	Ana Beatriz Barbosa Silva	UC5VvsTwsyKWMZSQtt1MPCEw	Education	359109	4574	79	0.017271534761697	0	437
DTgCGsffljg	Autismo Tratamento pela nutrição	no		1472050388	Roberto Andersen	UCxJ8B-O6H2ottFrNKW-fgZA	Education	12697	725	11	0.015172413793103	0	56
mALtyp2YyQI	CURA ARTRITE E OUTRAS DOENÇAS COM DIÓXIDO DE CLORO	no		1489400740	Maranata Restaurante	UCiqYqf5bRYRMEW_CgXhc7Vg	People & Blogs	32662	1295	26	0.02007722007722	0	56
MPK8_QOt-D4	MMS/CDs - A CURA PROIBIDA	no		1569104254	EU SOU	UC5zdbrXhirdxV5blrkwe-QA	Education	1769	255	3	0.011764705882353	0	93
LBuwGpOVjHc	A VERDADE POR TRÁS DO MMS/CD	no		1555625685	Andréa Werner	UC3lP5c55UE0ozG-uN0uBsXg	People & Blogs	39263	2630	1436	0.54600760456274	0
70unRyZoNVc	Autismo sem medicamentos	no		1470833922	Roberto Andersen	UCxJ8B-O6H2ottFrNKW-fgZA	Education	17446	870	20	0.022988505747126	0	105
UNZADEuQz6Y	A VERDADE sobre o MMS (Lair Ribeiro)	no		1564333642	Nathan Vidal	UCnPjkkDT0uVuaxXfhyhkR3g	People & Blogs	16056	1342	39	0.029061102831595	0	141
WEB_zfk3kIs	O autismo e os medicamentos	no		1526169199	Kenya Diehl	UCilO3ZOPdzgmccJg_NpJ5XA	People & Blogs	3674	246	5	0.020325203252033	0	31
OzjANfNUdQ4	Como foi receber o diagnóstico de outro filho com autismo	no		1550403003	Canal Kelly Almeida	UC02rt6F-KrUkOUHhWNsJPMw	People & Blogs	6882	694	5	0.0072046109510086	0	113
dBGXU7iJT0o	Autismo. Nelle varie fasi di età di sospetto di diagnosi. Ecco cosa fare	no		1490891956	Aldo Primicerio Quotidiano Medicina	UClJ5Bbh2XjqUxY7kL0VcdDQ	News & Politics	71951				0	7
C6XMSikQ1JQ	Vlog: O autismo agressivo que ninguém vê	no		1498489600	Cantinho da Taty Oficial	UCgzlObwvUkQMvSurmtFZmFw	People & Blogs	10340				0	51
L-83ZFg5Xn4	Top 5: Melhores Óleos para Cabelos Crespos e Cacheados	no		1422993199	Bruna Caixeiro	UCbFACr0PqttswP_W9heOPJg	Howto & Style	44196	676	67	0.099112426035503	0	17
4beSYDm2UpE	LUGOL e Seus Efeitos Colaterais | Dr. Juliano Pimentel	no		1521547200	Dr Juliano Pimentel	UCPGGSQfN8LREy6dWdk85fpw	People & Blogs	138861	5893	441	0.074834549465467	0	296
B6KsfXipihQ	Meu filho ainda não fala	no		1492270809	Bianca Santoro	UCC1sHLVCWUBP4qmaZ8WqPzg	People & Blogs	22167	930	39	0.041935483870968	0	154
LQ_w-YF8iQ8	RECADO URGENTE*SOBRE O AUTISMO E O REMÉDIO MMS* PERGUNTAS PARA LELE	no		1559011262	Leticia Alegria	UCGUMq1P0Q0G9UkIZIb6W5Mg	Entertainment	7282	402	45	0.11194029850746	0
5KctA7mYiRA	BRUNO testimonio recuperación total autismo (TEA)	no		1548777588	Katia Dolle S.L.	UC2ysTeeBjznIDRKaRs6yyHQ	People & Blogs	24889	530	30	0.056603773584906	0	94
o_mU1-4rUI0	Remédios naturais e casa para o autismo	no		1465984224	Rossy Tandann	UCJoCHT5SDyRL1EHdFpNerRw	People & Blogs	4524	76	3	0.039473684210526	0	0
KmBTeAeeweU	MMS 3 regras de ouro	no		1503323400	Décio Simão	UClXJT92i1vBvC51l00685CQ	People & Blogs	31834	1376	16	0.011627906976744	0	196
ms8-a7UrB40	Apresentação do MMS	no		1528896346	Andre Chilano	UC-v1PJRoid6DGFzY1jVU3hg	People & Blogs	12438	803	21	0.026151930261519	0	126
jtMiyqJmI98	Remédio MMS para Autismo - Não existe cura milagrosa!!	no		1558963970	Dra. Regia Gasparetto	UCyaAfND-YKtSQmSk_2dwvYg	Education	563	55	25	0.45454545454545	0	7
zp5VzazC1UU	MMS Saúde RELATO DE USO	no		1531411775	Lukinha oliveira	UC1iT5pP9zH8SYzpiEXK9I8g	People & Blogs	1026	81	2	0.024691358024691	0
HfA5T9kPpsQ	5.MMS CDS EU TOMEI	no		1555084856	APOCALIPSE 21	UC_c04hMm-Dmeuob61h5rZtw	People & Blogs	444	38	0	0	0	9
sZud1rvJV0E	URGENTE : Autismo Tem Cura SIM - Descubra Nesse Vídeo - Remedio Para Autismo - Dr. Lair Ribeiro 2019	no		1551222003	Dicas Naturais Online	UCquOzSBI-inhOTBgz-glU0w	People & Blogs	1892	157	1	0.0063694267515924	0	3
F-ZYG8PIRSU	#006 Medicamentos	no		1444462101	TDAH Descomplicado	UCl3pbBstPZJNgLtFX4VzCwA	People & Blogs	41481	2646	31	0.011715797430083	0	291
a76hDCwgWr0	Depoimento paciente MMS	no		1532971439	Valéria Morym	UCx0NPZYDVFFcBC2fVk1VykQ	People & Blogs	2046	75	18	0.24	0	11
b9EwNcrHbJc	5 COISAS QUE VOCÊ PRECISA FAZER QUANDO DESCOBRIR O AUTISMO EM SEU FILHO	no		1554881065	Autismo em palavras	UCK3Mn_YM1t-vG48cuTolL-A	People & Blogs	115	28	0	0	0	2
clQra_haVlo	MMS relato de uso dicas	no		1538062770	Lukinha oliveira	UC1iT5pP9zH8SYzpiEXK9I8g	People & Blogs	1345	94	4	0.042553191489362	0
MeEEyhtTyGM	Por que MMS	no		1558797296	Alexandre Costa	UCzMqxW3rrGH8t-hYprCCw2Q	Education	301	10	11	1.1	0	7
mwoVeKuHm5E	MMS Protocolo 1000	no		1503320968	Décio Simão	UClXJT92i1vBvC51l00685CQ	People & Blogs	111093	3429	118	0.034412365121027	0	681
4Nh4VPvEezs	Meu filho é Autista? O Veredito	no		1475617415	Mamãe Moderna	UCD-A5Pr7MO89tCftmDkkmjg	People & Blogs	425				0	2
VmSNm74B1Fs	MMS/CD- Autismo tem cura?	no		1559548394	Priscila Couto	UCARjkhJUViCfl7V_OJZ76WA	Comedy	68	2	4	2	0	3
7Ug7lv9Qs-U	Mesmo proibido uso do MMS avança no Brasil e nos EUA	no		1569866945	Ideias incríveis	UCqKxdaqQOfXheSPlklE6Ukg	People & Blogs	102	2	7	3.5	0	2
UfELAZiUEHA	Jovem Pan Agora - 10/02/2020	no		1581357766	Jovem Pan News	UCP391YRAjSOdM_bwievgaZA	News & Politics	236	31	1	0.032258064516129	0	0
X5fGp5CYSZs	Emoção toma conta de velório de Boechat em SP	no		1549967614	Jovem Pan News	UCP391YRAjSOdM_bwievgaZA	News & Politics	254334	5657	137	0.024217783277355	0	313
dxygJmU96hM	Dicas para combater a labirintite e tontura - Todo Seu (09/11/18)	no		1542042886	Todo Seu	UCW4t6ozY9VDVeN_GHK260BQ	Entertainment	524424	21493	707	0.032894430744894	0	444
vNyS-pAW8c4	Jornal Jovem Pan - 10/02/2020	no		1581361086	Jovem Pan News	UCP391YRAjSOdM_bwievgaZA	News & Politics	4131	435	26	0.059770114942529	0	6
2XyfJx14ygc	Febre amarela: saiba se você precisa tomar a vacina | Dr. Salim | Jovem Pan	no		1494883417	Jovem Pan News	UCP391YRAjSOdM_bwievgaZA	News & Politics	75959	1076	116	0.10780669144981	0	160
MWOCVWVBy-g	Carlos Bolsonaro x Rêgo Barros	no		1563839354	Os Pingos nos Is	UCzjtGnD7qqeaHW3nvDVrjQA	News & Politics	247897	15356	728	0.047408179213337	0	1768
iM0-F19w3cE	Conheça os SINAIS antes de um infarto - Mulheres (21/02/19)	no		1550781278	Mulheres	UCDtVoSwSwQgwhcC89Nlz5Vg	Entertainment	935771	26234	964	0.036746207212015	0	538
E3Et3gacIaM	Governo Bolsonaro vai bem porque está dando sequência ao meu diz Temer	no		1563832825	BBC News Brasil	UCthbIFAxbXTTQEC7EcQvP1Q	News & Politics	35426	1632	261	0.15992647058824	0	537
Vn4yzRDW8rQ	Samy Dana: Focus prevê IPCA de 3 21% para 2020	no		1581336515	Jovem Pan News	UCP391YRAjSOdM_bwievgaZA	News & Politics	475	49	0	0	0	2
sMv3IKEBysM	Vlog da minha semana : Vacina contra Sarampo Corte de cabelo etc - CAROL SANTINA	no		1565989205	Carol Santina	UClmKoaOV0xdb_2HgKNmo5nA	Entertainment	22540	1843	20	0.010851871947911	0
DLGoGu93gsc	Constantino: Com Johnson eleito Brexit deve acontecer mesmo sem acordo	no		1563888258	Jovem Pan News	UCP391YRAjSOdM_bwievgaZA	News & Politics	2884	252	8	0.031746031746032	0	15
7Z1rxq7QCDU	Vacina da gripe passa a ser oferecida para toda a população a partir de hoje	no		1559566959	Jovem Pan News	UCP391YRAjSOdM_bwievgaZA	News & Politics	1231	60	4	0.066666666666667	0	8
migRR8I6dqw	Jair Bolsonaro e Rui Costa trocam farpas pelo Twitter	no		1563913522	Jovem Pan - 3 em 1	UCEsbaUdrM_87K-2um30hf8Q	News & Politics	50963	1555	248	0.15948553054662	0	298
oyYewlJh5f4	Vacinação contra gripe H1N1 vai continuar	no		1275663567	TV BrasilGov	UCjaWLFTNqLkq3ZY2BJ4NYRg	Science & Technology	35132	95	23	0.24210526315789	0
n9XheyA8SPE	Caio Fábio no programa Pânico da Rádio Jovem Pan FM.	no		1447277534	Caio Fábio	UCT2iDke9SuPfp0XO0rr8YSA	People & Blogs	857226	18352	1199	0.06533347863993	0	1969
6ofLRt-mb5M	Comece a Comer 2 Cravos por Dia e Veja o Que Acontecerá	no		1549399500	INCRÍVEL	UCIQPHl1WKKTt9KkWyo_JNig	People & Blogs	4083894	233840	3262	0.013949709202874	0	3179
dqsMRMCD498	São Paulo inicia campanha para vacinar crianças nas escolas | SBT Brasil (27/08/18)	no		1535464691	SBT Jornalismo	UC376n347Ob5Lwzq2WGzF1AA	News & Politics	1413	10	0	0	0	1
oSxY6NlXibE	AO VIVO: Rádio Jovem Pan	no		1581337967	Jovem Pan News	UCP391YRAjSOdM_bwievgaZA	News & Politics	21810	903	46	0.05094130675526	0	9
R__7QBMkIEc	Técnico Vadão é demitido da seleção feminina	no		1563879208	Jovem Pan News	UCP391YRAjSOdM_bwievgaZA	News & Politics	651	32	0	0	0	5
SuYXbwTeCi8	AO VIVO: Rádio Jovem Pan	no		1581144675	Jovem Pan News	UCP391YRAjSOdM_bwievgaZA	News & Politics	7394	191	13	0.068062827225131	0	0
skVDUnt9VyM	Supremo confirma entendimento e impede Bolsonaro de extinguir conselhos	no		1560507539	Jovem Pan News	UCP391YRAjSOdM_bwievgaZA	News & Politics	4105	100	20	0.2	0	45
MU9IgIHyHKk	LEVEI UMA INJEÇÃO NO 🍑 | SOUSA	no		1531331078	João Jonas	UCi5_KLjyGPF4u5htAkzI16g	Film & Animation	393443	5951	483	0.081162829776508	0	234
iTxF9-63sk4	Vacinação de crianças contra HPV atrasa	no		1365209273	Jornal da Gazeta	UCNl_i-ggJbZNyOLlhE7yyhw	News & Politics	26186	143	30	0.20979020979021	0	2
nbJocGoVyc8	Bolsonaro nega intenção de acabar com multa em demissões sem justa causa	no		1563850198	Jornal da Record	UCmpHPgeCBgvk_fDXZQKsnAA	News & Politics	52210	1093	63	0.057639524245197	0	158
Z8vT3BLVxNY	Bolsonaro volta a reclamar do Inpe e pede relatórios mais completos	no		1563891263	Jovem Pan News	UCP391YRAjSOdM_bwievgaZA	News & Politics	12678	820	25	0.030487804878049	0	121
iFn2jx-_5Cs	RODRYGO DESTRUIU E FEZ GOLAÇO ! Bayern de Munique 3 x 1 Real Madrid - Melhores Momentos - 20/07/2019	no		1563675199	Lances 2.0	UCInWfLSA0oXG60F5O2HnGEQ	Sports	2537610	60098	2761	0.045941628673167	0	5346
A7pKjTWiMaM	BA: Governador não vai a evento com Bolsonaro	no		1563891562	Band Jornalismo	UCoa-D_VfMkFrCYodrOC9-mA	News & Politics	18451	580	174	0.3	0	304
fCh0p6_2vkQ	Vacina contra o sarampo será dada nas escolas na volta às aulas em SP	no		1563886340	Jovem Pan News	UCP391YRAjSOdM_bwievgaZA	News & Politics	1989	33	8	0.24242424242424	0	10
XIsnhC1HlWo	O Brasil já chegou perto do Comunismo? | Manuela d Ávila | Mude Minha Ideia | Quebrando o Tabu	no		1561467606	Canal GNT	UC0f866RMRdL5mSVnipiOHxg	Entertainment	481617	31999	5005	0.15641113784806	0	6481
a2ItgnOAMDk	Marco Feliciano defende a indicação de Eduardo Bolsonaro à embaixada do Brasil nos EUA	no		1563815910	Pânico Jovem Pan	UC9U4nIDyIzzelXrjNQXNvxA	News & Politics	122294	4341	547	0.12600783229671	0	708
KmVQm5A4n94	Eu amo o Nordeste diz Bolsonaro em visita à Bahia	no		1563895510	Record News	UCuiLR4p6wQ3xLEm15pEn1Xw	News & Politics	121807	6436	888	0.13797389683033	0	1244
aPnmIPteNMM	Campanha de vacinação contra o sarampo vai até 16 de agosto	no		1563371839	Governo do Estado de São Paulo	UCc7rfCbP90qiw3BgT-Iqc7g	News & Politics	666	9	0	0	0	0
lzNnS7q2JZQ	Vacina gripe - vídeo Escola	no		1494517557	Ministério da Saúde	UC12zKGLhMhDeDidoctM6BrA	Nonprofits & Activism	3069	37	6	0.16216216216216	0	1
S48gM-zETmE	População está desconfiada quanto a eficácia de vacina contra febre amarela | Jornal Jovem Pan	no		1522089918	Jovem Pan News	UCP391YRAjSOdM_bwievgaZA	News & Politics	1521	32	12	0.375	0	20
qaTC1pHmcvA	São Paulo confirma casos de sarampo em 2019	no		1554464098	Band Jornalismo	UCoa-D_VfMkFrCYodrOC9-mA	News & Politics	512	7	1	0.14285714285714	0	2
oOKygxmAGmk	Um mês antes de um ataque cardíaco seu corpo vai avisar você com estes 9 sinais!	no		1519651632	Cura pela Natureza - As melhores dicas de saúde!	UCYSslASzgHQ_F_vuTsmmi-g	People & Blogs	1324670	22077	970	0.043937129138923	0	582
X4ECZWVFtYs	FGTS LIBERADO - CONTAS ATIVAS E INATIVAS Novidades	no		1563544697	Educação Financeira - Cléber Miranda	UCuuKLWNMbOTV55j3Ujk18Zw	People & Blogs	2419961	188607	5959	0.031594797648019	0	5012
fw7nUPy1Qm0	Vasco briga com futebol chinês por atacante equatoriano | Atenção Vascaínos!	no		1561515075	Atenção Vascaínos!	UCRfPAk1AyQXr0VHVHFtaaag	Sports	62916	6450	63	0.0097674418604651	0	417
sMpbbz0-1hw	HUMORISTAS GAYS E FAMOSOS • CONFIRA MAIS UMA LISTA DE CELEBRIDADES QUE SAÍRAM DO ARMÁRIO	no		1557234594	Ploc Social	UCawdyxYFwKZmB4IbzzPxMSA	News & Politics	636947	6469	1099	0.16988715411965	0	760
5HrZXv6ItAU	Vacina em Escolas Públicas da Capital	no		1498169553	assembleiarr	UCRdhKdx8sCyx6KTwGmMb78g	News & Politics	3969	40	2	0.05	0	0
qJjKR-Iwsn8	Bolsonaro Responde Daniela Mercury - Ela Está Desesperada kkk	no		1551836702	QUESTIONE-SE	UCybVje4N7x7xY7Ia1OoxQAw	News & Politics	1281494	81159	3252	0.040069493217018	0	8950
aXZxxIwFZME	GOVERNADOR DA BAHIA VETA PM EM EVENTO COM BOLSONARO	no		1563889781	UOL	UCVFbXI6Gu8U2f9Gjtxw4A-Q	News & Politics	17992	585	425	0.72649572649573	0	441
Towj2T77A60	Bolsonaro e o submundo da sociedade	no		1563841705	TV GGN	UCPYIYR0J8ppEJVtR1weLnBw	News & Politics	75842	8607	120	0.013942140118508	0	420
roC9qqxJCo0	EBOLA | Nerdologia	no		1409241686	Nerdologia	UClu474HMt895mVxZdlIHXEA	Science & Technology	785570	71841	299	0.0041619687921939	0	2618
Q-X3gGKyq0M	Sim somos todos macacos (#Pirula 79)	no		1398954602	Canal do Pirulla	UCdGpd0gNn38UKwoncZd9rmA	Science & Technology	403045	33218	1036	0.031187910169185	0	3365
Zp_1-OYWxpE	O que é uma família? (#Pirula 113.1)	no		1441889469	Canal do Pirulla	UCdGpd0gNn38UKwoncZd9rmA	Education	234575	20020	2583	0.12902097902098	0	3141
FMUhEN_i6S0	O ato não compadecido: arreando Suassuna (#Pirula 77)	no		1398440986	Canal do Pirulla	UCdGpd0gNn38UKwoncZd9rmA	Education	268190	21599	2405	0.11134774758091	0	3665
7kVRxJWw6jM	Estado Islâmico (الدولة الإسلامية) (#Pirula 86)	no		1413666240	Canal do Pirulla	UCdGpd0gNn38UKwoncZd9rmA	News & Politics	362912	15389	817	0.053089869387225	0	1613
AHu7Ubz0MXw	O porquinho-da-índia no microondas (#Pirula 209)	no		1493332571	Canal do Pirulla	UCdGpd0gNn38UKwoncZd9rmA	Science & Technology	180240	20728	444	0.021420301042069	0	1351
x1E9N7MsfUg	A síndrome de Downkins (#Pirula 85)	no		1409088960	Canal do Pirulla	UCdGpd0gNn38UKwoncZd9rmA	Science & Technology	236871	17603	539	0.030619780719196	0	1940
d_e9juqBDis	Justiça com as próprias mãos (#Pirula 71)	no		1391861134	Canal do Pirulla	UCdGpd0gNn38UKwoncZd9rmA	News & Politics	250990	18758	1392	0.074208337775882	0	2218
05ykV3Z4Q0M	Malafaia e os argumentos anti-gay (#Pirula 57)	no		1361801804	Canal do Pirulla	UCdGpd0gNn38UKwoncZd9rmA	Science & Technology	464169	30123	2532	0.08405537297082	0	9327
4zokJl-Zpg8	Algo errado na educação (#Pirula 17)	no		1329616999	Canal do Pirulla	UCdGpd0gNn38UKwoncZd9rmA	Education	393941	28796	536	0.018613696346715	0	2848
1QShqmm1uKU	Pepsi fetos e adoçante (#Pirula 33)	no		1338723831	Canal do Pirulla	UCdGpd0gNn38UKwoncZd9rmA	Science & Technology	523813	32592	4961	0.15221526755032	0	4141
z7VAKJg5vjw	Reflexões sobre o desarmamento	no		1444606776	Canal do Pirulla	UCdGpd0gNn38UKwoncZd9rmA	Education	371769	25530	5158	0.20203681942812	0	5580
NeFwJ5rFYZw	Ética 3 - Morte e dor (#Pirula 18)	no		1347884746	Canal do Pirulla	UCdGpd0gNn38UKwoncZd9rmA	Science & Technology	165825	11654	136	0.011669812939763	0	1278
YcHGevYWGS4	Criacionismo [8] - Modus operandi	no		1415759345	Canal do Pirulla	UCdGpd0gNn38UKwoncZd9rmA	Science & Technology	187988	14468	309	0.021357478573403	0	3565
1JFqv8Ks81Y	Anti-vacinas terraplanistas e punh....gorilas (#Pirula 214)	no		1496581816	Canal do Pirulla	UCdGpd0gNn38UKwoncZd9rmA	Science & Technology	99574	11328	291	0.025688559322034	0	839
xnitmB22JtQ	Belo Monte é a Gota D água? (#Pirula 10)	no		1322975091	Canal do Pirulla	UCdGpd0gNn38UKwoncZd9rmA	Science & Technology	445256	20024	646	0.032261286456252	0	3094
IjUbaf1duCE	A memória sabe mentir (#Pirula 112)	no		1441287198	Canal do Pirulla	UCdGpd0gNn38UKwoncZd9rmA	Entertainment	148255	16101	235	0.014595366747407	0	1387
hMRZk2D8psk	Já deu minha cota pras cotas (faz uma cota) (#Pirula 46)	no		1349784844	Canal do Pirulla	UCdGpd0gNn38UKwoncZd9rmA	Education	452745	24461	2080	0.085033318343486	0	3929
Utbz0L22_gE	Ateísmo leva à depressão? #PergunteAoAteu 10 (#Pirula 234)	no		1574506845	Canal do Pirulla	UCdGpd0gNn38UKwoncZd9rmA	Nonprofits & Activism	97650	12749	141	0.011059690956153	0	1558
Gn0R-gb9SMc	Homossexualidade - ponto final. (#Pirula 29)	no		1335339506	Canal do Pirulla	UCdGpd0gNn38UKwoncZd9rmA	Science & Technology	1018631	64251	4351	0.067718790369021	0	17219
hrH7cJGPZBI	Ghira a zade e shera o delli (#Pirula 69)	no		1388368269	Canal do Pirulla	UCdGpd0gNn38UKwoncZd9rmA	News & Politics	116558	9451	687	0.072690720558671	0	1112
OPiNb4C3JBw	O resgate dos beagles (#Pirula 65.1)	no		1382155008	Canal do Pirulla	UCdGpd0gNn38UKwoncZd9rmA	Science & Technology	326898	20702	1708	0.08250410588349	0	7259
LliUFR1biZY	Você deveria se expor na internet? (Resposta ao Átila) (#Pirula 317)	no		1573596208	Canal do Pirulla	UCdGpd0gNn38UKwoncZd9rmA	Science & Technology	126518	14832	142	0.0095738942826321	0	933
qC-Rwm8ueQo	Argumentos que ateus não deveriam mais usar (#Pirula 52.1)	no		1355999548	Canal do Pirulla	UCdGpd0gNn38UKwoncZd9rmA	Science & Technology	634015	35796	1479	0.041317465638619	0	7881
Up1Rq59rVCI	Tubby e a Dissonância Cognitiva* (#Pirula 68)	no		1387111831	Canal do Pirulla	UCdGpd0gNn38UKwoncZd9rmA	Science & Technology	180891	16254	375	0.023071244001477	0	1400
01OEeNdZrqM	Pirula nas Zoropa 5 - Inglaterra	no		1369863306	Canal do Pirulla	UCdGpd0gNn38UKwoncZd9rmA	Travel & Events	53657	3908	51	0.013050153531218	0	549
z_QMwu0WJQY	Candomblé não é religião (#SQN) (#Pirula 80)	no		1400560561	Canal do Pirulla	UCdGpd0gNn38UKwoncZd9rmA	Education	200612	17974	386	0.02147546455992	0	1582
OvSN_q1_NLo	Tiffany e transsexuais no esporte (#Pirula 241)	no		1516033982	Canal do Pirulla	UCdGpd0gNn38UKwoncZd9rmA	Science & Technology	396752	29157	3457	0.11856501011764	0	4579
xcmNSgHuPRc	Ateu neo-ateu ou antiteísta? (ou exemplo de intolerância ao teísmo?) (#Pirula 39)	no		1342702887	Canal do Pirulla	UCdGpd0gNn38UKwoncZd9rmA	News & Politics	255804	18164	531	0.029233648975996	0	2831
vX0qDA4mGyM	Vida eterna (#Pirula 73.1)	no		1394019382	Canal do Pirulla	UCdGpd0gNn38UKwoncZd9rmA	Science & Technology	269933	20236	595	0.029403044079858	0	2960
Bf7EXGTh8X8	Um bate-papo com Drauzio Varella (#Pirula 196)	no		1485176431	Canal do Pirulla	UCdGpd0gNn38UKwoncZd9rmA	Science & Technology	689993	56778	1246	0.021945119588573	0	3241
3Vb6rHWOyX4	Criacionismo [7] - Mudando de nome	no		1392285602	Canal do Pirulla	UCdGpd0gNn38UKwoncZd9rmA	Science & Technology	165402	12253	177	0.014445441932588	0	2491
RqohMBQfWvk	Nióbio de cool é HOAX (#Pirula 56.1)	no		1360941636	Canal do Pirulla	UCdGpd0gNn38UKwoncZd9rmA	Science & Technology	756592	45403	7561	0.16653084597934	0	7561
LAZnSsBk1bI	Vício em redes sociais e Depressão em Youtubers (#Pirula 270)	no		1540085384	Canal do Pirulla	UCdGpd0gNn38UKwoncZd9rmA	Science & Technology	181191	20034	220	0.010981331736049	0	1286
jCZ3e45Us5o	Músicas iguais (coincidência musical?) (#Pirula 43)	no		1346797977	Canal do Pirulla	UCdGpd0gNn38UKwoncZd9rmA	Entertainment	239403	14566	595	0.040848551421118	0	2804
vLtk_jHnLEc	Trazendo pó levando bala (#Pirula 96)	no		1421797408	Canal do Pirulla	UCdGpd0gNn38UKwoncZd9rmA	News & Politics	143361	13727	321	0.023384570554382	0	1624
BWXBcto1Rj8	Politicamente correto anti-militância e o efeito mola (#Pirula 104)	no		1432226006	Canal do Pirulla	UCdGpd0gNn38UKwoncZd9rmA	Education	348270	29655	875	0.029505985499916	0	3402
c8SmQF_HpsU	Pais religião e crianças (#Pirula 319)	no		1577114431	Canal do Pirulla	UCdGpd0gNn38UKwoncZd9rmA	Science & Technology	94053	12749	184	0.014432504510158	0	1426
r7iQGy6rxfQ	Tempo Pirula e Medula (#Pirula 61)	no		1374694233	Canal do Pirulla	UCdGpd0gNn38UKwoncZd9rmA	Science & Technology	215220	19857	129	0.0064964496147454	0	2879
cFCETc1viBk	A questão Palestina 2: comentários (#Pirula 84.2)	no		1407192413	Canal do Pirulla	UCdGpd0gNn38UKwoncZd9rmA	News & Politics	185782	12809	353	0.027558747755484	0	1331
kJrgn5EW584	Difícil aprender inglês? Não mesmo. (#Pirula 89)	no		1414972804	Canal do Pirulla	UCdGpd0gNn38UKwoncZd9rmA	Education	721144	45776	1341	0.029294826983572	0	2874
ptgUy-W91W8	Etimologia de mulato e o racismo (#Pirula 294)	no		1552342044	Canal do Pirulla	UCdGpd0gNn38UKwoncZd9rmA	Science & Technology	202802	20282	935	0.04609999013904	0	2365
NgNiHEWG0V4	SEIS ADENDOS: Etimologia de mulato Caio Coppolla Bolsonaro quilombolas e outros (#Pirula 294)	no		1552674533	Canal do Pirulla	UCdGpd0gNn38UKwoncZd9rmA	Science & Technology	122376	10427	450	0.043157188069435	0	1071
OU1mJYOaHQM	O ataque ao Porta dos Fundos (#Pirula 320)	no		1577368892	Canal do Pirulla	UCdGpd0gNn38UKwoncZd9rmA	News & Politics	241309	28282	1217	0.043030903047875	0	3739
mP721XCqhhQ	Índios: o que fazer com eles? (#Pirula 48.1)	no		1351134285	Canal do Pirulla	UCdGpd0gNn38UKwoncZd9rmA	Science & Technology	229922	13351	527	0.039472698674257	0	1894
WI0nzR81g5U	Stephen & Alan (#Pirula 98)	no		1424211991	Canal do Pirulla	UCdGpd0gNn38UKwoncZd9rmA	People & Blogs	158456	15725	174	0.011065182829889	0	876
LVkklTe77Ww	Agnóstico ou Ateu? (#Pirula 26)	no		1333846769	Canal do Pirulla	UCdGpd0gNn38UKwoncZd9rmA	Science & Technology	624241	39732	1343	0.033801469847981	0	5318
ePG4rOwhuC8	A treta dos meus tweets sobre astrologia (#Pirula 262)	no		1534775500	Canal do Pirulla	UCdGpd0gNn38UKwoncZd9rmA	Science & Technology	201769	21532	485	0.022524614527215	0	3546
VFZ-JEpEGpw	Experimentos em animais e os beagles: FAQs (#Pirula 65.2)	no		1382446155	Canal do Pirulla	UCdGpd0gNn38UKwoncZd9rmA	Science & Technology	96413	6518	205	0.031451365449524	0	1236
SOhXPRhHEWY	Vegans vegetarianos e o Gary Yourofsky (English subtitles) (#Pirula 16)	no		1329080187	Canal do Pirulla	UCdGpd0gNn38UKwoncZd9rmA	Science & Technology	508226	28626	1698	0.059316705093272	0	6166
exuJvXat1oc	Criacionismo [11] - A Explosão Cambriana	no		1575063156	Canal do Pirulla	UCdGpd0gNn38UKwoncZd9rmA	Science & Technology	89102	11369	145	0.012753980121383	0	1014
vmSUmAykvRw	Corredores ecológicos: Mantiqueira Tombada (#Pirula 76)	no		1397956778	Canal do Pirulla	UCdGpd0gNn38UKwoncZd9rmA	Education	74006	9158	50	0.0054597073596855	0	594
GTad-8hVc_Q	Evolução e Dispersão dos mamíferos [REPOST] (#Pirula 62)	no		1376298466	Canal do Pirulla	UCdGpd0gNn38UKwoncZd9rmA	Science & Technology	226751	18520	176	0.0095032397408207	0	2087
uV4ahPYzrZI	Bolsonaro e Marcos Pontes contra o INPE (#Pirula 307)	no		1564101852	Canal do Pirulla	UCdGpd0gNn38UKwoncZd9rmA	Science & Technology	166142	25660	813	0.031683554169914	0	2426
-WfcJglsIRk	Estudar não dá em nada? : a polêmica da MC Mirella (#Pirula 300.1)	no		1555708873	Canal do Pirulla	UCdGpd0gNn38UKwoncZd9rmA	News & Politics	309642	33988	368	0.010827350829705	0	2521
3XdIRuUxwxY	Fósseis: as figuras do livro da Evolução PARTE 1 (#Pirula 210.1)	no		1493733636	Canal do Pirulla	UCdGpd0gNn38UKwoncZd9rmA	Science & Technology	104995	9754	119	0.012200123026451	0	557
BpF_bWwrzM8	A MATA ATLÂNTICA (+ corredores ecológicos; + Triplo A) (#Pirula 286)	no		1547251681	Canal do Pirulla	UCdGpd0gNn38UKwoncZd9rmA	Science & Technology	65201	7714	75	0.0097225823178636	0	552
J9meNiVHI78	Sobre gays e camarão (abominação) (#Pirula 41)	no		1343536885	Canal do Pirulla	UCdGpd0gNn38UKwoncZd9rmA	Education	101109	8694	772	0.088796871405567	0	2980
8OmSeeq1s9A	Homofobia deveria ser crime? (#Pirula 291)	no		1550322052	Canal do Pirulla	UCdGpd0gNn38UKwoncZd9rmA	Science & Technology	160921	19693	651	0.033057431574671	0	2635
5r5GZ9yt1g0	RIP Marcos Pontes RIP INPE (#Pirula 307)	no		1564784929	Canal do Pirulla	UCdGpd0gNn38UKwoncZd9rmA	Science & Technology	253731	41488	2435	0.058691669880447	0	4556
33_aAgaRyxI	Dicas de leitura 1 (#Pirula 74.1)	no		1396139500	Canal do Pirulla	UCdGpd0gNn38UKwoncZd9rmA	Science & Technology	175129	11109	375	0.033756413718607	0	566
2LDXSlx9puA	Missão marte? (#Pirula 88)	no		1414627204	Canal do Pirulla	UCdGpd0gNn38UKwoncZd9rmA	Science & Technology	164961	15157	525	0.034637461239031	0	970
mwQc3DnG7xc	Seca no Sudeste terra sem garoa (#Pirula 87)	no		1414332603	Canal do Pirulla	UCdGpd0gNn38UKwoncZd9rmA	Science & Technology	149445	12784	129	0.010090738423029	0	1228
kTjewD4LRiU	Evolução Charles Darwin e Seleção Natural Aula Grátis de Biologia - Teoria da Evolução e Darwinismo	no		1385064937	Curso Online Gratuito	UCUn9CBocrtIw6vNPYPGQ_5w	Education	1088422	35146	585	0.016644852899334	0	3720
9EjNl9LrADA	DINOSSAUROS: CRIANDO CASCA GROSSA (Jurássico) (#Pirula 277)	no		1552078014	Canal do Pirulla	UCdGpd0gNn38UKwoncZd9rmA	Science & Technology	92106	8339	79	0.0094735579805732	0	564
L51NrrK1APQ	A USP o câncer e a cura (#Pirula 117.1)	no		1445218419	Canal do Pirulla	UCdGpd0gNn38UKwoncZd9rmA	Science & Technology	458770	25465	4479	0.1758884743766	0	4560
yoBMBqSBHBY	Café com Vacina - Café Com Quê? 19 | BláBláLogia	no		1495565042	BláBláLogia	UC3Ooj_iDWELBumIEDejyNHQ	People & Blogs	48457	6583	45	0.0068357891538812	0	364
bp1Z_INGnzk	Quem paga a pesquisa no Brasil? (#Pirula 72)	no		1393007549	Canal do Pirulla	UCdGpd0gNn38UKwoncZd9rmA	Science & Technology	93770	7031	91	0.012942682406486	0	418
3gV7-StfCOQ	FAQ Design Inteligente FOR DUMMIES (DI NÃO É EVOLUÇÃO TEÍSTA) (Pirula #323)	no		1580613669	Canal do Pirulla	UCdGpd0gNn38UKwoncZd9rmA	Science & Technology	94594	11964	154	0.012871949180876	0	1323
yb9esk6XGpg	PISA e um montão amontoado de muita coisa escrita (#Pirula 321)	no		1578701345	Canal do Pirulla	UCdGpd0gNn38UKwoncZd9rmA	News & Politics	112867	13516	256	0.01894051494525	0	1821
_2mFGUbgrZc	PERGUNTE AO ATEU (feat. Pirula)	no		1540817931	Dois Dedos de Teologia	UCzGwyAyWLB2Si6VDFpq8rjw	Education	594156	57016	4467	0.078346429072541	0	6092
nHlRz0b-9LY	POR QUE TEMOS BUNDA? | Nerdologia	no		1391691604	Nerdologia	UClu474HMt895mVxZdlIHXEA	Science & Technology	1206192	98181	495	0.0050417086809057	0	2374
ZdDNRioK84M	Sacolas plásticas: precisa proibir? (#Pirula 37)	no		1340916131	Canal do Pirulla	UCdGpd0gNn38UKwoncZd9rmA	News & Politics	89901	6359	87	0.013681396445982	0	492
g4DepZZVco0	Whatsapp: a Deep Web de bolso (#Pirula 268)	no		1539108335	Canal do Pirulla	UCdGpd0gNn38UKwoncZd9rmA	Science & Technology	224729	23916	883	0.0369208897809	0	1967
6RvjMqesXvk	Live da Saudade	no		1580330040	Canal do Pirulla	UCdGpd0gNn38UKwoncZd9rmA	Science & Technology	39313	4646	32	0.0068876452862678	0	223
wJngm0XLSOM	Ideologia de Gênero mata? (#Pirula 306)	no		1563840854	Canal do Pirulla	UCdGpd0gNn38UKwoncZd9rmA	Science & Technology	106829	15361	395	0.025714471714081	0	1619
JIVCY5HfPSo	Efeito Placebo (#Pirula 3)	no		1302470588	Canal do Pirulla	UCdGpd0gNn38UKwoncZd9rmA	Science & Technology	127596	9120	152	0.016666666666667	0	1166
qAc5d_8MpTc	Aquecimento Global - Último Round (#Pirula 32.3)	no		1381793011	Canal do Pirulla	UCdGpd0gNn38UKwoncZd9rmA	Science & Technology	499094	24396	4595	0.18835054927037	0	5810
NBucAkhu0nY	Fusão dos Ministérios do Meio Ambiente e Agricultura? (#Pirula 272)	no		1541172513	Canal do Pirulla	UCdGpd0gNn38UKwoncZd9rmA	Science & Technology	179176				0	1569
M_ZsFV1V2Mg	Resposta: O bravo sem trabalho (#Pirula 34)	no		1339558225	Canal do Pirulla	UCdGpd0gNn38UKwoncZd9rmA	People & Blogs	454877	28314	10132	0.35784417602599	0	5186
rzHJdrMVx3k	O que é a metástase no câncer | Nerdologia	no		1566482450	Nerdologia	UClu474HMt895mVxZdlIHXEA	Science & Technology	180982	25518	73	0.0028607257622071	0	518
mOMIYR_ngtU	HIPNOSE - Você NUNCA vai ver o Pirula FALAR isso Novamente 😱😱😱	no		1545339603	Alberto Dell Isola	UClkNOcpdzzVTEW-SY10-DrA	Education	37897	4424	92	0.020795660036166	0	412
CN6lBq87eVo	CAUÊ MOURA + PIRULLA | POUCAS #34 - AGORA NO MOV SHOW | S02 EP01	no		1563231169	MOV Show	UCVrx8gt9oAHPbOjA-EjFblw	People & Blogs	469795	27914	832	0.029805832198897	0	1751
MGG-T0A33uE	DGA - Mamãe Falei apoia Anti-Vacina	no		1535140651	Maestro Bogs	UCRoiyPUpRJxPkVZYY1fHE1Q	Comedy	52032	5237	1565	0.29883521099866	0	864
cdjfWStVgwQ	Bolsonaro vs Lula: Não tem alternativa?	no		1537887609	Ideias Radicais	UC-NwgkrLPYmzM-xoLr2GX-Q	Education	142019	17117	1280	0.074779459017351	0	2557
Nz8i2n1esXg	Ciro Gomes sabatinado por Cientistas Brasileiros (29/07/2018)	no		1532913756	Progressista	UCFyLC5lgheGX-aNl9GH1uqQ	News & Politics	84315	3587	2385	0.66490103150265	0	833
aRV41uAnvFc	Cocielo x Justiceiros Sociais por Nando Moura! Racismo virou piada e politicamente correto??	no		1530741233	Lívia Zaruty	UCRqfUpoyxKlDFZH3-PmehFg	Entertainment	65415	4887	2998	0.6134642930223	0	1683
hpqGpbROVUI	Processinho da Marisinha	no		1536955293	Maestro Bogs	UCRoiyPUpRJxPkVZYY1fHE1Q	Comedy	44106	4706	860	0.18274543136422	0	696
QVK6R-J43dU	Direita diferentinha CE CURTE?	no		1581130971	Comuna Killers	UCHSFvNDPk5aN3g7lQeipX8Q	Gaming	3442	688	19	0.027616279069767	0	20
bnwNc22J1sw	RÁDIO RN - DIRETORIA DE CORRUPTOS E CANALHAS ... BASTA !!!	no		1581131765	RÁDIO RN	UCuVh3kbkOfmbiTgREBVvvQA	Entertainment	2730	292	27	0.092465753424658	0	2
6uBJth_XGSM	Política com vocês - 07/03/20 - A volta de Felix Fischer o juiz da Lava Jato ao STJ!	no		1581129320	Lula Livre - Por Nossa Democracia	UCANAywKcS6cJrbl-HiHPOWQ	News & Politics	4275	990	38	0.038383838383838	0	21
nPENpIvLM3Q	A MANOBRA DO SISTEMA FALSO DA ONU PARA OCULTAR OS VERDADEIROS HEBREUS DA BÍBLIA DO ALMEIDA	no		1581131825	Canal Edson Silva História	UCwh8NjwpQmD3PYYNFZg_tyg	News & Politics	3253	507	2	0.0039447731755424	0	26
hnaSfgGNFj0	Teste do Olhinho | Dra Ana Escobar	no		1551207109	Dra Ana Escobar	UCKtJs_zI1yzswHDWqkqHtWw	Education	1636	123	0	0	0	3
DktKsdDHnoc	Entenda a diferença entre Fórmula Infantil Composto Lácteo e Leite em Pó | Dra Ana Escobar	no		1576672200	Dra Ana Escobar	UCKtJs_zI1yzswHDWqkqHtWw	Education	2377	214	2	0.0093457943925234	0	8
4CSxlGy8JfA	Dicas Contra Gripe e Tempo Seco | Dra Ana Escobar	no		1438714095	Dra Ana Escobar	UCKtJs_zI1yzswHDWqkqHtWw	Education	9950	246	3	0.01219512195122	0	5
xCM7H3OP9Jo	5 Sinais de Pneumonia em crianças | Dr Lucas Fustinoni Médico - CRMPR: 30155	no		1409830449	Dr Lucas Fustinoni	UCjVPaRkoIgq_Whb1QkJjGKg	People & Blogs	635321	15533	681	0.043842142535248	0	431
ufPpFPJGux0	PEDIATRIA - Febre em crianças: quando medicar?	no		1332376967	DoutorMoises	UCW3l9WndLOjhRtsg0Aa--2g	Science & Technology	436577	6154	450	0.073123171920702	0	119
SLQZ3Iq_uWU	Gripe e Resfriado | Drauzio Comenta #01	no		1453138329	Drauzio Varella	UC9zqTTVeClpqMQ5CLuJdWtw	Science & Technology	1940747	66082	1697	0.025680215489846	0	2111
nR0rhbQHCjk	Dúvidas e Dicas sobre Sinusite | Dra Ana Escobar	no		1559934547	Dra Ana Escobar	UCKtJs_zI1yzswHDWqkqHtWw	Education	2956	248	0	0	0	8
i3CVH_Q3EWI	Dúvidas e Dicas sobre Tosse | Dra Ana Escobar	no		1560450609	Dra Ana Escobar	UCKtJs_zI1yzswHDWqkqHtWw	Education	10981	668	9	0.013473053892216	0	23
wPnjgdjT5n4	Gripe: Alergia a Ovo X Vacinas | Dra Ana Escobar	no		1461876778	Dra Ana Escobar	UCKtJs_zI1yzswHDWqkqHtWw	Education	10983	90	3	0.033333333333333	0	15
Ae9gkBxLhRM	VACINA MENINGOCÓCICA C | Calendário de vacinação infantil | Parte 8	no		1529208269	Enfermundo	UC8IbAhPglJ1OeC44A_Gtmqg	Education	15821	546	12	0.021978021978022	0	12
cBsLEaBGPU4	Convocação contra o mosquito Aedes Aegypti!	no		1568923315	Dra Ana Escobar	UCKtJs_zI1yzswHDWqkqHtWw	Education	273	35	0	0	0	2
jvNfyla1wHs	Campanha Nacional de Vacinação contra a Poliomielite e Sarampo (30 )	no		1533044859	Ministério da Saúde	UC12zKGLhMhDeDidoctM6BrA	Nonprofits & Activism	2079035	75	6	0.08	0	8
RPC7h7MtcMI	Vacinas contra Pneumonia já estão disponíveis na Imunosense	no		1497463128	Portal Ternura	UCZ9d2hCxMtceleJez4pJMNA	News & Politics	1731	39	2	0.051282051282051	0	2
RdDahwfQ_Do	Dra Ana na Vida Real | Entrevista com Priscilla de Paula	no		1561669230	Dra Ana Escobar	UCKtJs_zI1yzswHDWqkqHtWw	Education	543	43	1	0.023255813953488	0	3
ox-NknMayLk	Sarampo - Dr. Arlindo Scheisari Júnior infectologista	no		1524828602	Simples Assim	UCLpvqh2xTNg7Ewn2HyiMjxQ	Entertainment	1467	36	5	0.13888888888889	0	1
7iUtvI6inmI	Programa Bem Estar 11/07/2018 - A Ameaça do Sarampo - ÍNTEGRA	no		1531324045	Bem Estar no YOUTUBE	UCyR4dkya5rC7ZVJFNBrOMrg	Entertainment	3326	76	1	0.013157894736842	0	9
cQaoSgzc2No	Começa campanha de vacinação contra sarampo e poliomielite	no		1533580142	Record TV Paulista	UCdd1PhFKkX96UUr8KmK1DhA	News & Politics	396	5	2	0.4	0	1
BXzw-B7vpe4	HPV na gravidez parto e risco para o bebê	no		1519650000	Almanaque dos Pais	UCy7oVBYY0FGXeeJpy6ITXxQ	People & Blogs	25736	1483	19	0.012811867835469	0	77
xIP4D6UnXdw	O DIA QUE A HELENA TOMOU A VACINA DOS 4 MESES NO SUS | Mundo de Mariana	no		1535740844	Mundo de Mariana	UCUFDVVI3J0ZXtSmF9yL50xg	People & Blogs	8691	833	6	0.007202881152461	0	115
unUntPKg5oo	CONTANDO A GRAVIDEZ PRA FAMÍLIA	no		1552507527	Vício Feminino	UCtHcnXKvUqXSLQ_B1U9zpBQ	Howto & Style	497203	69953	239	0.0034165797035152	0	1792
k1kOI_gxmjs	Músicas Clássicas mais Conhecidas | Mozart Beethoven Chopin Bach... Música Clásica Piano Violino	no		1484667700	Músicas Clássicas	UCKPIuWx4Eo-WXTMJfHV8zeA	Music	3431291	50160	2714	0.054106858054226	0	2026
WtgGzKRHT-Y	What happens to children with autism when they become adults? | Kerry Magro | TEDxMorristown	no		1455895597	TEDx Talks	UCsT0YIqwnpJCM-mx7-gSA4Q	Nonprofits & Activism	256328	3514	122	0.034718269778031	0	634
HZOfjMXNPik	Stranger In The Family (Autism Documentary) | Real Stories	no		1480861800	Real Stories	UCu4XcDBdnZkV6-5z2f16M0g	Education	599254	3122	392	0.12556053811659	0	1378
FJ7iPn39i08	Robert DeNiro Debates Autism s Link To Vaccines | TODAY	no		1460555799	TODAY	UChDKyKQ59fYz3JO2fl0Z6sg	News & Politics	669258	6401	856	0.13372910482737	0	3848
XNL9YP8PH7M	Family living with Autism: Meet the Asners	no		1469583347	Attitude	UC1pEecEFODR1WZtH5w0ZTpw	Entertainment	615513	6313	381	0.060351655314431	0	914
6eS2CBMSZ4E	Autism Symptoms and Behaviors - Home Video	no		1485902702	See And Do Kids	UCKfjBrg8BNO-FgRRnAw3D1g	People & Blogs	1783102	10169	801	0.078768807159013	0	1045
Th2qasF16Ew	#3 O que é poliomielite	no		1533045244	Ministério da Saúde	UC12zKGLhMhDeDidoctM6BrA	Nonprofits & Activism	8188	89	3	0.033707865168539	0	2
imkrWwiypLw	Campanha de vacinação contra a poliomielite pretende imunizar 12 milhões de crianças	no		1371250838	TV BrasilGov	UCjaWLFTNqLkq3ZY2BJ4NYRg	News & Politics	609				0
-uWLAagVWFA	Autismo: causas geneticas e ambientais	no		1317710019	Gabriel de Carvalho	UCz2SAmBW1T1mJJGJefylanA	Education	6351	56	0	0	0	1
Ev04zWg5krg	A MENINA POBRE E O MENINO RICO #2 - A MENINA ABANDONADA - ANNY E EU	no		1531076099	Anny e Eu Family	UC8KpMaUwtS1nEkyCAzmojHQ	Entertainment	1980502	31343	2472	0.078869285007817	0
i-2zY4BdP1s	Infectious Diseases A-Z: Breaking down the MMR vaccine	no		1560809731	Mayo Clinic	UC8fQzKHIhSoZeSq3bwQx4mw	Science & Technology	3785	55	14	0.25454545454545	0	54
y42ISQ956gM	Autism Spectrum Disorder Presentation	no		1480998738	Paulina Naslonski	UCqbgV7oxe7H6t4_xiDnXfIw	Film & Animation	330760	4198	265	0.063125297760839	0	911
VZH5oXY0Z08	Saiba como as vacinas atuam no organismo | SEMPRE FELIZ	no		1491832162	Rede Super de Televisão	UCFl00VTEDEA0cHCoMQ7CuZg	People & Blogs	6342	80	10	0.125	0
l8e5kO5KHIs	A Bella Itália | Roberta	no		1530218266	Giovanna Maira	UCbah7H3RLT4yWwkTd3gsCFQ	Music	4865	198	1	0.0050505050505051	0	17
u3rlI4z4H44	Brasil registra mais de mil casos de sarampo nos primeiros sete meses do ano	no		1533271360	Jornal da Record	UCmpHPgeCBgvk_fDXZQKsnAA	News & Politics	219	13	1	0.076923076923077	0	1
i90tVvXkDr4	Antes de Culpar a Mãe pela causa do Autismo veja esse vídeo	no		1545858653	Dra Maria Claudia Brito	UCFbx6QBTcDI6toOnO-EyajQ	People & Blogs	2402	321	2	0.0062305295950156	0	13
fJk6P_j0_x4	SELETIVIDADE ALIMENTAR | O QUE EU FIZ | AUTISMO	no		1525049440	Meu Anjo Azul	UCoi5cG7JL_kZ-LGW6-PtZ_w	People & Blogs	18391	1572	17	0.010814249363868	0	161
mXdytn5go1Q	Homem diz que Messi pode ser autista - Programa SP no Ar - Rede Record	no		1378500146	InstitutoVerea	UC8Uj2P4_Zya4x4Oghx3afRg	Education	55107	700	66	0.094285714285714	0	146
CbhKPJD-Hxw	Alemanha: Multas Para Quem Não Vacinar os Filhos !	no		1557328045	Alex Sousa	UCCh7IUDKaRNmmbsDheYiLrQ	People & Blogs	304	19	2	0.10526315789474	0	10
uGGWLJC64k0	Especialista explica reações causadas pela vacina do HPV	no		1412103611	ITV BRASIL 50.1	UCIeG8B36iRu6S7EZh8EFyyA	News & Politics	2901	4	15	3.75	0	3
S2tOTXMsEME	experiencia de feira de ciencias!	no		1403209673	Gamalolftbr	UCsK-uQfZEgyRL9eCHUdYQKQ	People & Blogs	340041	8128	278	0.034202755905512	0	260
H6H6GMKOGqw	Vaccine: Myth vs Fact	no		1551659892	NST Online	UCsWp7U58TZM8uOYtRrAqWhg	News & Politics	77	3	5	1.6666666666667	0	3
Lo9aylIwstA	#VaxXed #Missouri #MTHFR #Flu	no		1478986548	VaxXed StoriesChannel #VaxXed #VaxXedStories	UCAQrR3MfrinvEviHRt5qzJA	People & Blogs	1132	38	0	0	0	3
rN5hS4DWRGE	Jornal da Tarde - População é convocada para se vacinar contra o sarampo - 29/06/18	no		1530290364	assembleiasc	UCeBR3fhWb-Jyt8i7Hy6_mjA	News & Politics	109	2	0	0	0	0
hY-zUoRN2H0	Autismo - Causa sinais e tratamentos	no		1522668672	Programa Visita	UC3BM7BL4nRVbSfypz9npVgw	People & Blogs	144	16	0	0	0	0
q7zyyX7PK9E	COMO CONSTRUÍRAM AS PIRÂMIDES? | Nerdologia	no		1399557780	Nerdologia	UClu474HMt895mVxZdlIHXEA	Science & Technology	1405553	107335	940	0.0087576279871431	0	3561
qip5YJw-f9c	Racismo | Nerdologia	no		1437055203	Nerdologia	UClu474HMt895mVxZdlIHXEA	Science & Technology	916932	102533	873	0.0085143319711703	0	3965
RM77fAQpeTQ	Fosfoetanolamina | Nerdologia	no		1447333200	Nerdologia	UClu474HMt895mVxZdlIHXEA	Science & Technology	590482	67314	791	0.011750898772915	0	2621
57M7YjkDFbs	A VANTAGEM DO POLEGAR OPOSITOR | Nerdologia	no		1400767206	Nerdologia	UClu474HMt895mVxZdlIHXEA	Science & Technology	527561	57801	215	0.003719658829432	0	1422
l2fHd7PpzRo	O FUNGO DE THE LAST OF US | Nerdologia	no		1409839320	Nerdologia	UClu474HMt895mVxZdlIHXEA	Science & Technology	965236	80488	370	0.0045969585528278	0	2133
yvBJg3io7q4	VIDA EXTREMA | Nerdologia	no		1387458901	Nerdologia	UClu474HMt895mVxZdlIHXEA	Science & Technology	831587	87744	225	0.0025642778993435	0	1713
4YwPyZf-DDI	AS MARCAS TE MANIPULAM | Nerdologia	no		1384434002	Nerdologia	UClu474HMt895mVxZdlIHXEA	Science & Technology	1093064	107668	334	0.0031021287662072	0	2431
pyJnl2lw4pU	Medo do Escuro | Nerdologia	no		1435240801	Nerdologia	UClu474HMt895mVxZdlIHXEA	Science & Technology	803063	87549	291	0.0033238529280746	0	1856
L9f9oaYdBZE	MEMÓRIA GENÉTICA | Nerdologia	no		1383224404	Nerdologia	UClu474HMt895mVxZdlIHXEA	Science & Technology	768971	72714	225	0.003094314712435	0	1652
A_Bak5dWPMs	GAMES DEIXAM AS PESSOAS MAIS VIOLENTAS? | Nerdologia	no		1394719206	Nerdologia	UClu474HMt895mVxZdlIHXEA	Science & Technology	693677	72862	315	0.004323241195685	0	2011
CM9xBCj7h5Q	O JEITINHO BRASILEIRO | Nerdologia	no		1392296406	Nerdologia	UClu474HMt895mVxZdlIHXEA	Science & Technology	1103689	99845	388	0.0038860233361711	0	1990
zHCOOkCn1UE	Qual é a cor do vestido? | Nerdologia	no		1425564003	Nerdologia	UClu474HMt895mVxZdlIHXEA	Science & Technology	558565	61909	326	0.0052657933418404	0	1703
0WRcSmp_3t8	Maioridade Penal | Nerdologia	no		1439474400	Nerdologia	UClu474HMt895mVxZdlIHXEA	Science & Technology	726900	76604	2024	0.026421596783458	0	3349
XINJpXE4eqM	AFLIÇÃO!!! | Nerdologia	no		1391086899	Nerdologia	UClu474HMt895mVxZdlIHXEA	Science & Technology	714497	83014	221	0.002662201556364	0	2114
jB3EFK_vAuo	A Armadura do Homem de Ferro | Nerdologia	no		1429192805	Nerdologia	UClu474HMt895mVxZdlIHXEA	Science & Technology	1364246	92402	486	0.0052596264150127	0	1514
JJZHgxVS_7A	Câncer tem cura? | Nerdologia	no		1568302514	Nerdologia	UClu474HMt895mVxZdlIHXEA	Science & Technology	209943	34262	115	0.0033564882376977	0	1057
6J47x599ZFQ	COMO MATAR O WOLVERINE | Nerdologia	no		1382018404	Nerdologia	UClu474HMt895mVxZdlIHXEA	Science & Technology	1135552	95223	540	0.0056708988374657	0	4833
YMI3CrChwSk	SEIS GRAUS DE SEPARAÇÃO | Nerdologia	no		1396533605	Nerdologia	UClu474HMt895mVxZdlIHXEA	Science & Technology	790918	72998	333	0.004561768815584	0	1440
i7ZURF4AyhI	E se dinossauros evoluíssem como humanos? | Nerdologia	no		1576159206	Nerdologia	UClu474HMt895mVxZdlIHXEA	Science & Technology	257974	35362	246	0.006956620100673	0	754
VZrQODHklJk	POSSESSÃO ABDUÇÃO OU PARALISIA DO SONO? | Nerdologia	no		1388667603	Nerdologia	UClu474HMt895mVxZdlIHXEA	Science & Technology	922617	95279	379	0.0039777915385342	0	4625
8X5-XxLtaSQ	ZONA DA MORTE | Nerdologia	no		1382619604	Nerdologia	UClu474HMt895mVxZdlIHXEA	Science & Technology	775135	82723	145	0.0017528377839295	0	1915
G2oXniwFXeY	LEVANTE ZUMBI | Nerdologia	no		1381413773	Nerdologia	UClu474HMt895mVxZdlIHXEA	Science & Technology	1068898	108396	335	0.0030905199453854	0	3393
kUwzffvlZtY	Attack on Titan e como funciona o Aparelho de Movimentação Tridimensional | Nerdologia	no		1576762973	Nerdologia	UClu474HMt895mVxZdlIHXEA	Science & Technology	222502	35953	227	0.0063137985703557	0	1677
e-JaQOeFxtI	O que é o Coronavírus? | Nerdologia	no		1580999617	Nerdologia	UClu474HMt895mVxZdlIHXEA	Science & Technology	254577	37249	171	0.0045907272678461	0	961
kKKW6RlQygM	Como seria o Tarzan? | Nerdologia	no		1424959201	Nerdologia	UClu474HMt895mVxZdlIHXEA	Science & Technology	593670	67248	272	0.0040447299547942	0	1238
fXCL3jzM1js	CONSTRUINDO A ESTRELA DA MORTE | Nerdologia	no		1390482005	Nerdologia	UClu474HMt895mVxZdlIHXEA	Science & Technology	709622	71617	224	0.0031277489981429	0	1917
iItfqDViLcg	QUAL O SOCO MAIS FORTE? | Nerdologia	no		1386248406	Nerdologia	UClu474HMt895mVxZdlIHXEA	Science & Technology	1350304	106746	646	0.0060517490116726	0	6409
CcM4eEE4R0Q	GRAVIDADE | Nerdologia	no		1383829202	Nerdologia	UClu474HMt895mVxZdlIHXEA	Science & Technology	718476	67490	269	0.0039857756704697	0	1038
eSGtN70TcJg	DRAGÃO ARROTA FOGO! | Nerdologia	no		1386853210	Nerdologia	UClu474HMt895mVxZdlIHXEA	Science & Technology	761547	79610	281	0.0035297073232006	0	1744
c1Da6E5Ysbw	Quanto vale o nióbio? | Nerdologia	no		1567692006	Nerdologia	UClu474HMt895mVxZdlIHXEA	Science & Technology	338809	46476	384	0.0082623289439711	0	1980
0Ji9Q6sa8-o	A FRATURA DE ANDERSON SILVA | Nerdologia	no		1389272405	Nerdologia	UClu474HMt895mVxZdlIHXEA	Science & Technology	980097	96417	432	0.0044805376645197	0	2241
8hU7f1cf7iA	Qual o maior parasita humano? | Nerdologia	no		1415278810	Nerdologia	UClu474HMt895mVxZdlIHXEA	Science & Technology	802877	71673	1003	0.013994112148229	0	2630
D3p0PRYBCPE	SIMPATIA FUNCIONA? | Nerdologia	no		1408629611	Nerdologia	UClu474HMt895mVxZdlIHXEA	Science & Technology	630498	62526	256	0.0040942967725426	0	1668
r9r_VwoZvho	Pandemias | Nerdologia	no		1457618402	Nerdologia	UClu474HMt895mVxZdlIHXEA	Science & Technology	567711	65061	215	0.0033045910760671	0	1464
EExCImj4Ls8	OS PODERES REAIS DO MAGNETO | Nerdologia	no		1397138405	Nerdologia	UClu474HMt895mVxZdlIHXEA	Science & Technology	1008800	90657	229	0.0025260046107857	0	2730
EusdmL4Ra7o	Quem descobriu e de quem é a Antártida? | Nerdologia	no		1579010404	Nerdologia	UClu474HMt895mVxZdlIHXEA	Science & Technology	210423	27024	120	0.0044404973357016	0	940
ZK5vwrLthl0	A ascensão de Napoleão | Nerdologia	no		1575994870	Nerdologia	UClu474HMt895mVxZdlIHXEA	Science & Technology	144857	18891	60	0.0031761156106082	0	476
Bu0_AwwEBR8	COMO FAZER UM SABRE DE LUZ | Nerdologia	no		1398348034	Nerdologia	UClu474HMt895mVxZdlIHXEA	Science & Technology	1217794	91057	1078	0.011838738372668	0	2491
26AgMFsh-98	Como Funciona a Homeopatia? | Nerdologia	no		1453986000	Nerdologia	UClu474HMt895mVxZdlIHXEA	Science & Technology	682624	71274	1165	0.016345371383674	0	3021
hLPLCdWyFi8	A BIOLOGIA DO GODZILLA | Nerdologia	no		1401976805	Nerdologia	UClu474HMt895mVxZdlIHXEA	Science & Technology	788816	68636	304	0.0044291625386095	0	1353
C4eHJ8ZJgG4	CAOS E EFEITO BORBOLETA | Nerdologia	no		1389877205	Nerdologia	UClu474HMt895mVxZdlIHXEA	Science & Technology	1646335	123152	583	0.0047339872677667	0	2722
3crSCPw7ofk	HACKEANDO O MUNDO | Nerdologia	no		1401372007	Nerdologia	UClu474HMt895mVxZdlIHXEA	Science & Technology	844526	72776	292	0.0040123117511267	0	1125
4gZr0XYY3eU	MONTANDO O ROBOCOP | Nerdologia	no		1392904806	Nerdologia	UClu474HMt895mVxZdlIHXEA	Science & Technology	622858	62888	154	0.0024487978628673	0	1661
pvcr9jxdCLo	História no filme O Último Samurai | Nerdologia	no		1576592134	Nerdologia	UClu474HMt895mVxZdlIHXEA	Science & Technology	150679	21422	55	0.0025674540192326	0	447
CsyH0dPxx-Y	POKÉMON EVOLUI? | Nerdologia	no		1385643606	Nerdologia	UClu474HMt895mVxZdlIHXEA	Science & Technology	733415	71966	683	0.0094905927799239	0	1501
xWqedHeXRGg	COMO GANHAR SUPER-PODERES | Nerdologia	no		1394114503	Nerdologia	UClu474HMt895mVxZdlIHXEA	Science & Technology	1269441	83629	993	0.011873871503904	0	2250
nW-Mqe9Tgjc	Estamos ficando mais burros? | Nerdologia	no		1414069202	Nerdologia	UClu474HMt895mVxZdlIHXEA	Science & Technology	827222	77435	276	0.0035642797184736	0	1923
sJoQ9hGGsJU	Proatividade | Nerdologia Ensina 05	no		1577109613	Nerdologia	UClu474HMt895mVxZdlIHXEA	Science & Technology	119467	17239	108	0.0062648645513081	0	323
uhnz7r9BQ8o	A QUÍMICA DO MAL DE BREAKING BAD | Nerdologia	no		1393509605	Nerdologia	UClu474HMt895mVxZdlIHXEA	Science & Technology	868023	74999	290	0.0038667182229096	0	1660
nl3D3Q-Rfqs	GOLPE DA MORTE | Nerdologia	no		1395324006	Nerdologia	UClu474HMt895mVxZdlIHXEA	Science & Technology	1518623	98214	836	0.0085120247622539	0	1898
2i0GsErWF50	SKATE VOADOR | Nerdologia	no		1397742816	Nerdologia	UClu474HMt895mVxZdlIHXEA	Science & Technology	507945	49662	157	0.0031613708670613	0	1099
wskKu-a8ywI	SER INVISÍVEL É POSSÍVEL? | Nerdologia	no		1388062804	Nerdologia	UClu474HMt895mVxZdlIHXEA	Science & Technology	1114518	110535	266	0.0024064775862849	0	2390
5CsfRfEFKv0	QUEM VAI GANHAR A COPA? | Nerdologia	no		1402581604	Nerdologia	UClu474HMt895mVxZdlIHXEA	Science & Technology	471030	45054	480	0.010653882008257	0	4064
kFSPf9257Ew	4 fortes indícios de que Deus NÃO existe - E SE FOR VERDADE	no		1521586824	Fatos Desconhecidos	UCbAiIkPobUFy71zlmwVw3jw	Entertainment	1865524	106359	21628	0.20334903487246	0	49333
C2CEgSDp0Sk	As inspirações mitológicas de The Witcher | Nerdologia	no		1580829700	Nerdologia	UClu474HMt895mVxZdlIHXEA	Science & Technology	143757	23012	74	0.0032157135407613	0	496
zstVRbu2FV8	Não sou um robô! A verdade sobre o reCAPTCHA	no		1547989215	Integrando Conhecimento	UCkAbeyJZqp6JFYfKy-98NjA	Science & Technology	642187	68932	517	0.0075001450705043	0	2581
3k7HngPkgUM	O Irã moderno e seus golpes e revoluções | Nerdologia	no		1579615565	Nerdologia	UClu474HMt895mVxZdlIHXEA	Science & Technology	125818	16637	87	0.00522930816854	0	633
81UDliFezRI	Por que dão tanto soro nos hospitais? Ql remédio existe no soro fisiológico | Dr Lair Ribeiro	no		1550249349	U MIÓ QUE TÁ TENO	UC4F32QLrpDmmRrozxr9z59g	Science & Technology	543861	36605	1046	0.028575331238902	0	2932
Xo9MCcjFyIc	Uma direita anti-científica anti-vacina e anti-razão.	no		1565218172	conde loppeux	UC-aa1wREP4i9XRA5_rqed0A	Entertainment	14314	1912	214	0.11192468619247	0	799
4AwW_QCYE30	Atividade física em 360 | Coluna #46	no		1467900149	Drauzio Varella	UC9zqTTVeClpqMQ5CLuJdWtw	Science & Technology	20931	1675	22	0.013134328358209	0	88
Ja6ZnJUQa_0	Por que você DEVERIA se expor na Internet	no		1573221603	Atila Iamarino	UCSTlOTcyUmzvhQi6F8lFi5w	Science & Technology	184464	30871	221	0.0071588221955881	0	1145
0bGaTBPyYbw	NÃO DEIXE SEU FILHO ASSISTIR FELIPE NETO! Doação de livros homossexuais na bienal gera polêmica	no		1568062800	Canal do Ferreira	UCZ4pDPv5kdO_2Da5brOlOZQ	News & Politics	324286	47263	5995	0.12684340816283	0	7340
sXMaPAVxUE4	Nos ensinaram que ISSO não existe	no		1564253416	Fatos Surpreendentes	UC8kDe2c78xdmZ2YwPy9h-4A	Nonprofits & Activism	156273	7676	143	0.0186294945284	0	305
6cJRURhCJ2E	Diálogo Brasil debate a importância da vacinação	no		1496869760	tvbrasil	UCSv9d0kQegylHWpP83jWSQg	Entertainment	1880	29	3	0.10344827586207	0	0
cEdwgAH57AM	Como prevenir o infarto?	no		1367958657	Vida Melhor	UCCD5yY6oDcu-PvLnP4FIJ8A	Music	57078	1234	64	0.051863857374392	0	19
uYyzJ8eFYzU	Como funciona a Homeopatia .	no		1400189060	tvunivali	UCdWW_ho2ZGQ9nZwqRNyQsGQ	Science & Technology	13589	196	17	0.086734693877551	0	33
p67vvPIZXEQ	Médicos alertam para vacinação contra poliomielite	no		1531156500	TVTEC Jundiaí	UCO5eykNr9w8p5eoGQz3AFfg	Entertainment	804	15	0	0	0
LSyZUrV8IDk	MARIDO ABRE MÃO DE TUDO PARA CUIDAR DA ESPOSA COM ELA [CC]	no		1502907790	TV EVANGELIZAR	UCBpwS_TPjdLt_FLgl0ZtZAg	Nonprofits & Activism	1946268	37430	463	0.012369756879508	0	3283
oBqIFoua1Qg	Alzheimer: A dor do esquecimento	no		1389862236	Revista ÉPOCA	UCKoXJUb5JUVyejefUckrOqA	People & Blogs	367441	8361	206	0.024638201172109	0	404
i7k--NIpouA	Volta do Sarampo e importância da vacinação	no		1533591153	TV UFMG	UCvNbTU5NSQ_K8cWfY9OmWsw	Education	424	10	0	0	0	0
tuuYaOjVLgA	VACINA BCG | Calendário de vacinação infantil | Parte 1	no		1527457138	Enfermundo	UC8IbAhPglJ1OeC44A_Gtmqg	Education	29926	884	25	0.028280542986425	0	12
ftG_eneelz8	Começa a campanha de vacinação contra a paralisia infantil	no		1370731454	Jornal da Gazeta	UCNl_i-ggJbZNyOLlhE7yyhw	News & Politics	312	2	0	0	0	0
tHqGFPmyphE	Vício em refrigerante | Drauzio Comenta #36	no		1483966804	Drauzio Varella	UC9zqTTVeClpqMQ5CLuJdWtw	Science & Technology	1111618	76898	1415	0.018400998725585	0	2703
jSXrywTcnAY	11 milhões de crianças são esperadas em campanha de vacinação	no		1533597892	TV Canção Nova	UCVrKQMmA2ew9LFzeIDaOFgw	Entertainment	2174	111	7	0.063063063063063	0	0
97MlUP6Zduc	Saúde: poliomielite pode atingir os adultos?	no		1427723072	Jovem Pan News	UCP391YRAjSOdM_bwievgaZA	Entertainment	5071	76	5	0.065789473684211	0	2
FVjT6lUJ_Qg	CN Notícias: Começa vacinação contra paralisia infantil - 15/06/12	no		1340036333	TV Canção Nova	UCVrKQMmA2ew9LFzeIDaOFgw	News & Politics	74	1	0	0	0	0
81jF4HbJ5SU	Tem início a Campanha de Vacinação contra Paralisia Infantil	no		1439835434	TV Canção Nova	UCVrKQMmA2ew9LFzeIDaOFgw	Entertainment	629	5	1	0.2	0	0
NTQajKos9_E	Começa neste sábado (8) a campanha de vacinação contra a paralisia infantil	no		1370656480	Jornal da Record	UCmpHPgeCBgvk_fDXZQKsnAA	News & Politics	421				0
thSmJ8ZFCJc	Cadeia de Frio em Sala de Vacina	no		1398617136	EpidemioChannel Br	UCh3wFqG58kJMTT_2jYBPN_w	Science & Technology	60673	471	43	0.091295116772824	0	16
_Kw0V8McK_Q	As polêmicas declarações do Ministério da Saúde | Morning Show	no		1471026719	Morning Show	UC-wcdrzucnlKGBjyEUaEWaQ	Entertainment	5269	47	1	0.021276595744681	0	8
6jxn8omolGE	Papo Médico - Paralisia infantil - TVR	no		1442585317	REC Produções	UC-F65qHnOSZMunINek4nmvw	People & Blogs	8938	185	6	0.032432432432432	0	14
nAUwPKS7zhI	Rotary Club conscientiza pessoas para a vacinação contra a poliomielite	no		1535569420	Programa Ver Mais Blumenau	UC6weCvYc5fRFMT0-BgYJ40Q	People & Blogs	53	1	0	0	0	0
dh04Id1JJ5k	A pergunta mais séria que o ateu pode fazer ao crente ● Ariano Suassuna	no		1501159650	Saber Filosófico	UCWdXgfpEIZIGzah9_yCL-Xw	Education	2901017	133791	3599	0.026900165183009	0	16209
sMcVNCDvP-4	Ministro da Saúde anuncia nova forma de financiamento do SUS	no		1514499082	TV BrasilGov	UCjaWLFTNqLkq3ZY2BJ4NYRg	News & Politics	4129				0
qsvlrkH8Avc	Você sente tontura ao se levantar rápido?	no		1374508331	Jovem Pan News	UCP391YRAjSOdM_bwievgaZA	News & Politics	818234	14131	477	0.033755572854009	0	1458
y4CdaFXqRuo	Morar só - Sou 60	no		1493046760	Sou 60	UCOqJ7A31bYTQ631pOyHQbSw	Entertainment	501127	17578	564	0.032085561497326	0	1271
Z_EP-0PQYGQ	Calendário de Vacinação.flv	no		1348610216	CanalFIPMoc	UCqcgQALJgSopINSo4ojtUBw	People & Blogs	123200	971	67	0.069001029866117	0	55
14KUto4awDQ	Ministério altera doses para quatro vacinas	no		1474497358	Ministério da Saúde	UC12zKGLhMhDeDidoctM6BrA	Nonprofits & Activism	827	13	4	0.30769230769231	0	1
zid4Niu2f18	Paciente em Fase terminal ESATER EN14.2 A (Dramatização)	no		1414426348	Daiane Nascimento dos Santos	UCz8po9AOG6nAZthb5wkcA5Q	People & Blogs	1529881	7386	1694	0.22935282967777	0	447
7ct_ISe2FVM	Campanha da vacinação contra gripe começa nesta quarta-feira	no		1554927218	Record News	UCuiLR4p6wQ3xLEm15pEn1Xw	News & Politics	1203	62	3	0.048387096774194	0	3
_TGHwxbMCAk	A psicologia para o envelhecimento saudável.	no		1475270754	tvunivali	UCdWW_ho2ZGQ9nZwqRNyQsGQ	Sports	8558	210	8	0.038095238095238	0	4
rKXw01IYvPY	PROBLEMAS DA INFERTILIDADE MASCULINA	no		1488981608	DOUTOR AJUDA	UC1Nm7gQCcGvgLyVcGTXp-Ww	Education	101144	3176	66	0.020780856423174	0	146
0w_ssBQlP2g	Aprendendo o calendário vacinal 2019	no		1532402260	Lucas Meira	UCFiFWF2iO_oNhPywupD_4Uw	People & Blogs	73937	2550	82	0.032156862745098	0	107
cwQeuZw18Q4	Sarampo faz terceira vítima no país após 20 anos de controle da doença	no		1530886116	Fala Brasil	UCwVmZjJwkCUCOes5_eAIebg	News & Politics	532	18	2	0.11111111111111	0	0
gIP6E4SxvhM	Vacinação Sarampo	no		1533158267	GRUPO DTTV	UC6kFZxGgyD2OZGz8ubNBqhQ	News & Politics	27	1	1	1	0	0
yEqLm6UiWd0	Vacinação contra sarampo e paralisia infantil gera repercussão	no		1535995325	Jornalismo TV Campos de Minas	UCehjkgm2t2aXko3WbvcUS1w	News & Politics	43	2	0	0	0	0
VeVQ9shC91g	Campanha de vacinação contra sarampo e poliomielite começa nesta segunda (6)	no		1533566184	Fala Brasil	UCwVmZjJwkCUCOes5_eAIebg	News & Politics	1522	13	2	0.15384615384615	0	3
SmNbdQTy0mM	Campanha de vacinação contra paralisia infantil e sarampo começam na próxima segunda 06 JE	no		1533341786	Televisão Atalaia	UC0Uzow4iFA8PoIKE_U2rmeg	News & Politics	87	0	0		0	0
nEvBAvG6E7c	Por que a vacina não é para todas as idades?	no		1524176537	Ministério da Saúde	UC12zKGLhMhDeDidoctM6BrA	Nonprofits & Activism	850	7	2	0.28571428571429	0	0
2u0WcgxRDAY	Ministério da Saúde e SUS - Vacinação	no		1533235819	ArquivodaPropaganda	UCLRScGfwGJfP0Gl5cOlb4iQ	Film & Animation	2603	8	2	0.25	0
FOebsUQNk5o	PE alerta sobre vacinação contra o sarampo | JORNAL ESTADO	no		1523370604	REDE BRASIL OFICIAL	UCubxEhRi56_V4_eTzzcFwkA	News & Politics	352	16	1	0.0625	0	3
zpWgDJhhrY8	Mudanças no Calendário de Vacinação 2018	no		1515697436	TV Costa Norte Parnaíba-PI	UCw4ORVGi_3GyytS3R-mWPJw	News & Politics	2426	20	2	0.1	0	0
4OeCUnC-kFA	O Centrão decide as eleições? William Waack comenta	no		1532121815	Painel WW	UCAVq36KDhPluroMCL1BZhbg	News & Politics	171876	15430	493	0.031950745301361	0	1513
aPq5zvcYhgw	Alzheimer - Como Evitar Alzheimer	no		1492481412	Dr. Willian Rezende - Regenerati Neurologia	UC53RGn66h410b5wkQlNvb3A	Education	21942				0	60
G6Bna6g4IVk	10 alimentos que limpam a gordura das artérias naturalmente.	no		1477189582	Altas Dicas	UCSNQJKbyfyDIKbov3uh-tkA	People & Blogs	1583598	51659	2214	0.042857972473335	0	371
5S954gOjxlA	O Que Acontece Se Comer 2 Bananas Por Dia? Descubra Agora	no		1474927202	Natureba - Curas Naturais	UCN9eb1Z__4hietbXmwxOglw	Howto & Style	7530425	177087	7087	0.040019877235483	0	1081
bhXWxwXXCb0	DEMÊNCIAS	no		1412768316	Paulo Cavalcanti	UCvs0YgDMR5lKC_XJglx0f-A	People & Blogs	14674	258	16	0.062015503875969	0	11
h9MtNcIz1Ic	Ana Maria Braga e o câncer no pulmão.	no		1454274277	CONEXÃO 92	UC1Dz3vC3vthE-nZq0ZyCF4g	Entertainment	2806314	36209	3766	0.104007291005	0	805
ELLE4elnYz8	Conheça os benefícios da kombucha (+ Como fazer) // Viver Bem	no		1566504439	Unimed Fortaleza	UCUtDAMp91VCfHTZ9_ypKRPA	People & Blogs	15582	71	1	0.014084507042254	0	2
HziK926tMFs	SARAMPO | Tudo o que você precisa saber	no		1533848546	Beep Saúde	UCzzv3f3UIhYZlIeuOl2QH9Q	People & Blogs	24998	253	52	0.20553359683794	0	10
A78xF16SZW0	Confiança e coragem a quem mais precisa | Websérie: Nosso Jeito de Cuidar | Ep. 2	no		1579270287	Unimed Fortaleza	UCUtDAMp91VCfHTZ9_ypKRPA	People & Blogs	412	22	1	0.045454545454545	0	0
kH34z9y56_w	Catapora sarampo e varíola - Parasitologia - Biologia	no		1408057405	Kuadro Oficial	UCPsFqRodwOk0esir1I2qaqQ	Education	15665	220	12	0.054545454545455	0	8
P1RMMXQD7hc	Vacina contra o sarampo é essencial para quem vai viajar para a Europa	no		1373036958	Canal da Saúde	UCpZO2Fi6cd_PXZNH0yeGjSw	News & Politics	639	4	0	0	0	0
yBifuP3CJTE	Você sabe o que é anemia falciforme? // Viver Bem	no		1565276485	Unimed Fortaleza	UCUtDAMp91VCfHTZ9_ypKRPA	People & Blogs	2820	54	1	0.018518518518519	0	6
xr-lnc94RSI	Infectologista esclarece dúvidas sobre a febre amarela	no		1516210918	Morning Show	UC-wcdrzucnlKGBjyEUaEWaQ	Entertainment	6838	119	13	0.10924369747899	0	5
wAT69t-Q86g	Saiba tudo sobre a caxumba!	no		1344286980	Vida Melhor	UCCD5yY6oDcu-PvLnP4FIJ8A	Entertainment	108429	1334	82	0.061469265367316	0	124
lBn3SNO04UU	Fluxo Sanguíneo - Invasão do Vírus	no		1233666241	academiadeciencia	UC5BKM57hcPBdRuH6bbTkYJw	Science & Technology	453103	8168	138	0.016895200783546	0	278
oC4eFVuAtl8	Brasil exportará vacina contra sarampo e rubéola	no		1383762739	Ministério da Saúde	UC12zKGLhMhDeDidoctM6BrA	News & Politics	272	0	0		0	0
8Mbtye4boF8	Campanha de vacinação contra paralisia infantil e sarampo começa em novembro	no		1414685923	TV BrasilGov	UCjaWLFTNqLkq3ZY2BJ4NYRg	News & Politics	379	2	0	0	0
y2cAuMRU844	Mitos e Verdades: Febre Amarela - Você Bonita (11/01/18)	no		1515692868	Você Bonita	UCxucJ9P3mLMneYypLZYn2uw	Howto & Style	7973	162	16	0.098765432098765	0	13
KNuE1fsOme8	Vida Melhor - Entrevista: Dr. Ralcyon Teixeira - Infectologista - fala sobre Sarampo	no		1311368326	Vida Melhor	UCCD5yY6oDcu-PvLnP4FIJ8A	Entertainment	1269	4	0	0	0	1
8bObuVxyIiw	Você pode estar treinando à toa: saiba como treinar membros superiores corretamente // Viver Bem	no		1579720365	Unimed Fortaleza	UCUtDAMp91VCfHTZ9_ypKRPA	People & Blogs	323	32	0	0	0	0
bvHMy7VgM6A	É possível se livrar de vez das celulites? // Viver Bem	no		1564604243	Unimed Fortaleza	UCUtDAMp91VCfHTZ9_ypKRPA	People & Blogs	7102	22	1	0.045454545454545	0	0
Q03URI_rvSc	WebPalestra: Sarampo - Alerta de Importação no Brasil	no		1517597957	Telessaúde ES	UChFIPDFYjTFg03eWlwmQcTA	Education	2623	84	2	0.023809523809524	0	3
Q_FxEPg1wa8	5 erros que você comete na academia // Viver Bem	no		1575576212	Unimed Fortaleza	UCUtDAMp91VCfHTZ9_ypKRPA	People & Blogs	400	40	2	0.05	0	4
4JMTcTiETZ4	Pra que serve o kefir? // Viver Bem	no		1567023885	Unimed Fortaleza	UCUtDAMp91VCfHTZ9_ypKRPA	People & Blogs	17515	61	1	0.016393442622951	0	3
IikXG7avLKc	Vacinação contra sarampo - vídeo institucional	no		1310148768	Planalto	UCjjYaSHsZSUNTSwUV8OfOrA	News & Politics	1718	5	0	0	0
9iYC3gOzDMs	Infectologista fala sobre avanço da febre amarela no Brasil	no		1500925526	TV CÂMARA SÃO PAULO	UCP8XlGjPSGj8JkuZ8hgDAJw	News & Politics	174	2	0	0	0	1
cpMdOpGjWs8	Mantendo sua vacina em dia antes de viajar - Parte 1	no		1393357843	Unimed Fortaleza	UCUtDAMp91VCfHTZ9_ypKRPA	People & Blogs	170	3	1	0.33333333333333	0	0
1cJEw7g3A8A	Começa Campanha Nacional de Vacinação contra Poliomelite e Sarampo	no		1533564626	tvbrasil	UCSv9d0kQegylHWpP83jWSQg	Entertainment	219	24	1	0.041666666666667	0	2
YwYoA9P1w8k	O que é Sarampo?	no		1420434924	mK	UCXGDt3qci5cSIOAeylkCyug	Education	3072	32	2	0.0625	0	0
ahzcg6dy5MM	Nossas Batalhas	no		1392596825	Abri - Associação Brasileira de Imunodeficiência	UCojMGwjEcjMzwKzscrcfQog	People & Blogs	539012	16951	238	0.014040469588815	0	456
LcKUKukiAEo	Trump pede que americanos se vacinem contra sarampo	no		1556321135	Band Jornalismo	UCoa-D_VfMkFrCYodrOC9-mA	News & Politics	437	25	0	0	0	3
4XCaV7oPIoM	Caminho da Prevenção: bicicletas compartilhadas em prol do Outubro Rosa	no		1571691807	Unimed Fortaleza	UCUtDAMp91VCfHTZ9_ypKRPA	People & Blogs	758	21	0	0	0	0
3rgUAiN_-2s	VACINA SARAMPO	no		1311123367	TV Candidés	UCFHiszunJVb2r1OPCk3wn1A	News & Politics	442	3	0	0	0	0
uJ9TcxidvME	CAMPANHA DE VACINAÇÃO POLIOMIELITE SARAMPO	no		1415438917	barraprefeitura	UCHvpySztDuMSugbQFkc-2EA	News & Politics	1395	5	0	0	0	0
BeunsVqfR28	Quadro Saúde - As contra-indicações à vacinação infantil	no		1423054360	TV Câmara Ribeirão Preto	UCqQhCrYl2nXCmLGZ83zZ6yw	People & Blogs	380	0	0		0	0
JtrLaQBItpg	Sarampo	no		1378122598	paulotmaluf	UCVqsCVR4IBc6OHt4yrNEsIw	People & Blogs	6305	65	2	0.030769230769231	0	0
qifjnVa3tCo	Virus.3A	no		1323623346	Karina Diniz	UCugmDwbLeJMpW4-tH_f2toQ	Education	2021	3	1	0.33333333333333	0	1
cga-e0d88qo	Campanha de vacinação contra o sarampo - 22.07.2011.asf	no		1311376480	tvitapoan	UCWgI8r-ZLzd_iMBXa8u8iMA	News & Politics	2424	2	1	0.5	0	0
H_Eji2_R49E	Sobre a Febre Amarela para gestantes e mulheres que amamentam!	no		1517056577	Carolina Guimarães	UCG_dvlfCvB4tnv-zCRCyS4g	People & Blogs	256	7	0	0	0	4
lXMc15dA-vw	NOVA | Immunity and Vaccines Explained | PBS	no		1412607606	PBS	UCgyeJxD05YnoDquRMNBfBqw	Entertainment	100487	516	21	0.040697674418605	0	65
fkExcL3qXS8	RETROSPECTIVA CIENTÍFICA 2019!	no		1576594811	Nunca vi 1 cientista	UCdKJlY5eAoSumIlcOcYxIGg	Science & Technology	1707	431	2	0.0046403712296984	0	97
Qqc_ExxEcEY	To Vaccinate or Not? Two Mothers Debate	no		1345666271	PBS NewsHour	UC6ZFN9Tx6xh-skXCuRHCDpQ	News & Politics	34234	113	100	0.88495575221239	0
QZPpvWsTCyQ	Brasil amplia cobertura de vacinação do rotavirus em 86% em 2011	no		1351852478	TV BrasilGov	UCjaWLFTNqLkq3ZY2BJ4NYRg	News & Politics	2974	11	0	0	0
0Csl1NKpIl0	Classic Game Room HD - BURGERTIME for Atari 2600 review	no		1232840439	80s Comics	UCh4syoTtvmYlDMeMnwS5dmA	Entertainment	65751	440	13	0.029545454545455	0	118
-A8j-B0couk	1° desafio Méliuz #vloguei	no		1541358856	Nunca vi 1 cientista	UCdKJlY5eAoSumIlcOcYxIGg	People & Blogs	1450	277	0	0	0	21
sxUGItxoiQ0	Qual o caminho para ser cientista no Brasil?	no		1538665207	Nunca vi 1 cientista	UCdKJlY5eAoSumIlcOcYxIGg	People & Blogs	7516	700	9	0.012857142857143	0	67
rQjhTNXQKp8	La medicalización de la sociedad por la Dra.Teresa Forcades - Parte 1	no		1383476401	Mindalia Televisión	UCmn8oX1V_E14jsR4KXIbeSQ	Education	52971	611	31	0.050736497545008	0	49
KuDf0va3Xls	MARIA CLARA 2 MESES - UTI - ROTAVIRUS - RECUPERAÇÃO	no		1375205328	Camila Vasconcelos	UCKf_IwDvP5LrJbktpfwtFmA	People & Blogs	27442	318	9	0.028301886792453	0	31
I7uuPl_bLUU	Nova etapa de vacinação contra gripe começa e inclui forças de segurança e salvamento	no		1555978203	TV BrasilGov	UCjaWLFTNqLkq3ZY2BJ4NYRg	News & Politics	706				0	0
3E8TbBZ3W00	Vacinas | Debate: Riscos e benefícios - USP Talks #22	no		1535981841	USP Talks	UCw8ZXVXrAyNTdvzKH6HMhmg	People & Blogs	590	20	4	0.2	0
kayYXdU21Bk	PIRULA ABRE O BICO E REVELA TUDO	no		1556636414	Nunca vi 1 cientista	UCdKJlY5eAoSumIlcOcYxIGg	People & Blogs	8021	1209	8	0.0066170388751034	0	92
YSrLHGmTCk0	Vacinas de 4 meses: Penta Polio Rotavírus e PN10 2a dose	no		1492783558	Marcela Carvalho	UCd239n4B2lCnSZ9SwbulOAQ	People & Blogs	8199	99	10	0.1010101010101	0	20
7Rx_HwtsMe0	COMO FUNCIONA O TRATAMENTO DA ÁGUA? - especial mês das crianças	no		1572966001	Nunca vi 1 cientista	UCdKJlY5eAoSumIlcOcYxIGg	Science & Technology	393	112	1	0.0089285714285714	0	5
u2zUap1s2BE	Terraplanista explica crença	no		1574111366	Record News	UCuiLR4p6wQ3xLEm15pEn1Xw	News & Politics	250220	8194	1701	0.2075909201855	0	5517
OTGeSqr-COQ	MENSTRUAR PODE TE DEIXAR MENOS INTELIGENTE	no		1552491000	Nunca vi 1 cientista	UCdKJlY5eAoSumIlcOcYxIGg	People & Blogs	56232	12009	27	0.0022483137646765	0	1282
TdzFjgHg3Bs	PORQUE EM AGOSTO TEM TANTAS QUEIMADAS? - Especial mês das crianças	no		1572534006	Nunca vi 1 cientista	UCdKJlY5eAoSumIlcOcYxIGg	Science & Technology	343	96	0	0	0	10
NamG9DqRJ0E	Lucas lucco part. Fernando e Sorocaba - Foi daquele jeito (Letra + voz)	no		1421137911	Villa Music	UCOeb7hXfWgeCLEgM-7fmwhQ	Music	160953	1781	34	0.019090398652442	0	46
sgEwj8hkYaU	Tutorial de cientista	no		1542640722	Nunca vi 1 cientista	UCdKJlY5eAoSumIlcOcYxIGg	People & Blogs	3893	608	4	0.0065789473684211	0	40
769ZYU1-bMg	O segredo para uma boa memória	no		1549634400	Nunca vi 1 cientista	UCdKJlY5eAoSumIlcOcYxIGg	People & Blogs	4116	742	4	0.0053908355795148	0	36
Aou9SiOta9Q	#7 - making of Fora de Cogitação - AS Aventuras de Poliana	no		1562881478	Giovanna Ruiz Oficial	UClFN0Swh7dHb7Zs2bfZQ0qA	Entertainment	9356	402	5	0.012437810945274	0	38
8-xXFp2iMVE	Fora de Cogitação - Giovanna Ruiz - Prévia	no		1564977877	Poli Prévias	UCy14ALftdLPFvTgZ8HoW3JA	Music	60159	1634	29	0.017747858017136	0	134
muVfmU9FeWA	A TERRA É PLANA? | Matemática Rio feat. Canal do Mundo	no		1484732960	Matemática Rio com Prof. Rafael Procopio	UCjIPRjJZtGhzWD2LrEKOHMA	Education	224436	7614	3036	0.39873916469661	0	8635
WwDjK5NB5jk	Justiça obriga casal de Rio do Sul a vacinar os filhos	no		1565638510	Balanço Geral Blumenau	UCkKQLj-hApuDB5JOGNa6B9A	People & Blogs	198	9	5	0.55555555555556	0	5
V73rpsXTYLg	Zeolita e seus benefícios .	no		1536093728	MEDICINA QUANTICA DR DAVI RODRIGUES	UCObLld43EhuoGxJZCadLKpQ	Science & Technology	47982	3201	49	0.015307716338644	0	419
[truncated: 33,959 more rows]
