# Supplementary material
Source: publisher figshare collection journal article supplement (https://frontiersin.figshare.com/ndownloader/files/25261583)
Supplement: Supplementary file 5 [file 25261583 › yt_recommendation/data/01-initial_ytdt_query/query_3-videonet_channels_search50_nodes2286_2020_02_10-20_46_32.gdf]

nodedef>name VARCHAR	label VARCHAR
UCHyeOQ0-Td0Dv3xfI0dwu3g	Universidade da Química
UCuAaB8lLRmoZzOrc_d_Ka0A	CBI of Miami
UC9zqTTVeClpqMQ5CLuJdWtw	Drauzio Varella
UCN-opsqqDunWO6h5uCp9Y4g	Hoje em Dia
UCSv9d0kQegylHWpP83jWSQg	tvbrasil
UCMMJm4lYxEh7GM4loYh6-SQ	programaViaLegal
UChsZDP7pW_08Sk6Tp4U8KJA	Dicas do Salgueiro
UC8b-2BfQ-PpYKESOfEGhYBQ	Vencer Autismo
UCGILPX9AE6hZpqp1FjFn6pw	SegredosDaLaurinha
UC3Ooj_iDWELBumIEDejyNHQ	BláBláLogia
UCu_a6PAzp30Bn2mM-Ll09LA	RECORD TV
UCyuDCBA1ig-x1YeAQBX2b4g	Scio Education
UCP391YRAjSOdM_bwievgaZA	Jovem Pan News
UCthbIFAxbXTTQEC7EcQvP1Q	BBC News Brasil
UCH2VZQBLFTOp6I_qgnBJCuQ	Canal Nostalgia
UCBx_CluVFNvy0TXsmNBZ-ow	PUC TV GOIÁS
UCVqS-HRwe2vq_Jjgu4fg-UA	Dr. Uronal Zancan
UCtym0q5w1NeYqVjzSwRntgQ	Elcio da Silveira Machado
UCgbbjw8zPkrmmL_XU1SgJBg	Criar e Crescer
UCnNvQI_yyWPZGI-rqFhR17Q	O Lado Bom do Mundo
UC9fxSdFjcz5QWDEhYCk_k1w	Fafá conta histórias
UCvLNnnIZdqXYqAS-l8FLJFw	ESCUDO pt
UCf9lX9Vc4CWBUKQxVfZ6MtQ	Juntando as Peças do Autismo
UCGfBE94turq_hyKMxB-Dfrg	Ver Mais Londrina
UC-4ddcVkyrXXbBqedYV4l9Q	Confederação Nacional do Comércio de Bens Serviços e Turismo
UC12zKGLhMhDeDidoctM6BrA	Ministério da Saúde
UCl1eRuftjRdetdWkrbeDBGg	Celso Cavallini
UCWq1xltHB2fDe6YkYoOrryg	Canal do Schwarza
UCKtJs_zI1yzswHDWqkqHtWw	Dra Ana Escobar
UCoa-D_VfMkFrCYodrOC9-mA	Band Jornalismo
UC5ZXYxeWlROKbL7JziJ0bIQ	O Historiador
UC-v1PJRoid6DGFzY1jVU3hg	Andre Chilano
UCz54U1Ts7JR7ZtSiClcVOOw	UFLA
UCk9mgpQVdJ5oKQWkM1UPBaQ	Dr. Lair Ribeiro Oficial
UCdGpd0gNn38UKwoncZd9rmA	Canal do Pirulla
UC5o3Raq_jrrSFZ5rkC8uBvw	Momento Aleatório
UCUtDAMp91VCfHTZ9_ypKRPA	Unimed Fortaleza
UCdKJlY5eAoSumIlcOcYxIGg	Nunca vi 1 cientista
UClu474HMt895mVxZdlIHXEA	Nerdologia
UCNl_i-ggJbZNyOLlhE7yyhw	Jornal da Gazeta
UCa1o8yRux22rDwRbEjokSPg	Viver com Saúde e Atitude
UCWo6OpatSyHZijRG_MwObFA	Leonardo Guimarães
UCyoGb3SMlTlB8CLGVH4c8Rw	euronews (en español)
UC3PLVO-mt6ZQLiySKdJedCA	Familia Jones
UCcoPc-BqFPkVkkwyS35J-ng	Revista Novo Tempo
UCUhobUO_K4qY2z1OJ7tw_rA	Cristófoli Biossegurança
UCxucJ9P3mLMneYypLZYn2uw	Você Bonita
UCk0U1Js-um2lRjSF3VoS_3A	Luna ABA
UCXj2oSzwg6G0iBjKg33joMQ	Khan Academy Brasil
UCmpHPgeCBgvk_fDXZQKsnAA	Jornal da Record
UCG-eghyORxNrzSG8FkAWKyw	Biologia Total com Prof. Jubilut
UC81fUuO3oGR-ju7tEAuyNPA	Dra. Andreia Torres
UCe1XNXkGImWSq5n4wkzNjBw	SAÚDE & BEM ESTAR
UCPR3gVNYBzi-02_O4noC1Zg	Junior Hallak Medicina e Saúde
UClN6OLbLp1YjTSwDOkEM2dA	Dr. Dayan Siebra
UCF_C2UbEzxoCn1mu6AltgvA	Jumosan1
UC0LDNBjI8prPXedEj3QosOQ	Odilon Cardoso de Farias
UCz1xVDltULzUhZCJ1TkvnTQ	Mamãe Tagarela
UCJJMzrEvAsnrfx8ur7DisQw	Mônica Nóbrega
UCF8Uaj9cnSkL-63NSPnBVCQ	Ação Autismo
UCqZN-NqgP7bhbctbyThSVUA	Balanço Geral
UCstv_dyLeuAbDB8ISTfkFbQ	A farmácia de Deus com Lisa Santos
UCj7tzC9HCCUnkROYJocRzYA	Carlos André Andredafm
UCuqsl-IppoFW0uNPQfbXAVg	RECEITAS E DICAS DE SAÚDE
UChkPByjtZumJrJmtqkiw5Jg	Ceticismo.net
UCVPdtCCsEsem4hyVwS_GzOQ	O Melhor Para Você
UCmV27tf2iqUZDDtXiShSKUg	CCATES
UC4F32QLrpDmmRrozxr9z59g	U MIÓ QUE TÁ TENO
UCv3JgOy__M8B3xsa5adWR6g	Jorge S
UCj0_I61NA_sCFI2JW4QdOCQ	Rafael Guerra
UC3vZWDAhX5356m17Vy1B2GA	Atalaia De Yeshua
UCP-Vg2PcmLiWpEdvMI1R35w	Domingo Espetacular
UCLgti7NuK0RuW9wty-fxPjQ	TV Senado
UCykUsChWx0cy2ZRn3r0s5qQ	Cachalote Documentários
UCxt_nr6Xwbq4O2Ur9ZBpgAA	Conexão Futura
UCFbx6QBTcDI6toOnO-EyajQ	Dra Maria Claudia Brito
UCE0KRm8m9_ki8MrMYGyjpAw	Medicina Resumida
UCR9EXU15wObpFMDyQmHXeuw	Banguela Reversa
UC7m35AnSXe8aSsBWRCPEQ1g	Dr. Evandro Salgado
UCHwQqfFkSlJXCgbjA1DJcKw	Academia do Autismo
UCyjo9Vr-Okmq7OHYyEQHGTQ	APAIXONADA MATERNIDADE
UCrSM1UV_KLAdTzgxyxl3POw	Olá Ciência!
UC4_WOkaSB6TMFad-v0T6qmg	Dra Tielle Machado
UCPGGSQfN8LREy6dWdk85fpw	Dr Juliano Pimentel
UC2mdv67uDPQO35IYkzK_Xzw	Autistologos Autismo
UCXogxn8ApsdqeXyIDvBWOzg	Ismael Sobrinho
UCBgDfWeylq5S_4yBpgg0rKA	Papa Capim de Fibra
UCsCeWWW8sk8zDaPzw6Ll67g	seligajapa
UCquENngBYGYpHYtN0OVYLKQ	Bruno S. Alves
UCvsvFTlOWSFU_RBinLDU7Ow	Professores do Brasil - Prof. Sergio Oliveira
UCrtNrQTDykcrtfYMkggmV5g	Vinicius Alves
UCIksRr4M8kOqxUTyYDSwy4A	Suely Freitas-Terapeuta Bioenergética
UC1_-z9fMYofIUQWYUPoNyTw	Pediatria Do Estilo de Vida
UCIu-GZ6a7B-IMyUs1rD629w	Referenciando
UCsAMQ6_-iRdEWBVh8q-IXmA	Verdades Ocultas e Inconvenientes!
UCKHhA5hN2UohhFDfNXB_cvQ	Manual do Mundo
UC4zG6UeNUn-HM6UEFFkiESA	Aulalivre - Enem 2020 e vestibulares
UCA1nC2t2zfzBOySscmpIzGQ	Aline Vicente
UCI2EhvTADDdOex2nBIRsigw	PortalEducacao
UCWijW6tW0iI5ghsAbWDFtTg	Rádio BandNews FM
UCDtVoSwSwQgwhcC89Nlz5Vg	Mulheres
UCSruzCoJeEIu3jNSwrCU9HQ	Saúde em Dia
UCW4t6ozY9VDVeN_GHK260BQ	Todo Seu
UCUp-GSUuNxSZ7cxOg7ZnyqA	Tua Saúde
UCIQPHl1WKKTt9KkWyo_JNig	INCRÍVEL
UChHd-MU2mOvZHmBQz6zJw_w	EnfConcursos - Enfermagem para Concursos
UCw8ZXVXrAyNTdvzKH6HMhmg	USP Talks
UCXdXYG8dUmEv6jhEji_lSHg	Jornalismo TV Cultura
UCViYj9umcJZdjKITQrB1D5A	Doutor TV
UCjzUQX-5DwOTR1q68ydu_bg	CEDIPI
UCVFbXI6Gu8U2f9Gjtxw4A-Q	UOL
UCsW2F43izuIFU58yq_anyDA	Dra. Gisela Savioli - Nutricionista
UCq8ChnGCYMVCzDgGMK9e91A	Anii G.
UCkke64Kird1ZcZsPJEo_hYg	Aplicar Conteúdos em Saúde
UCZ4pDPv5kdO_2Da5brOlOZQ	Canal do Ferreira
UCbM9lRa0XE5Nsgqo8rsndvg	Aucielly Nobre
UCWX70TFNwDsBLYlRzOe_-zw	Balanço Geral Joinville
UCwQhAc44SfDvhdCQiHluBVQ	O NATURAL É MELHOR
UCJMH8GNRXMjr2uGci28v9_g	Gemeas Japonesas
UCy7oVBYY0FGXeeJpy6ITXxQ	Almanaque dos Pais
UCS7R8itSUunTrA19WrZMWxw	Eu amo meu bebê
UCORRcj9wv5DEYCEg2LhBcLQ	WELIDA DANCINI
UCR2IONXExRWEGxREw7lXHCQ	Tia Dani
UC2mmP8ysfyko40KSn90x6Og	Canal Futura
UC8CYH-5VBNcMj9wta4W8cPw	Jéssica Machado
UCDes47D0_xrzOm_r7b9RQAQ	Balanço Geral Oeste
UCD9kk0EUEtflrRl6TV0lDyA	ENFrente Enfermagem Continuada
UCZmc8QllMtE-fr51p1niyjw	MaterniArte
UCOcG-EPdn2gsWVuMpF1TRVA	Stefany Rago
UCyvhqROV3luJvtt2dLTFhAA	Balanço Geral Itajaí
UCT0ECF7TihWahDqpU2i9tQA	Gustavo TV
UCV6Ue4o5UIeKQ3IEkjnXRlg	vejapontocom
UCMYTIyqS1-7wT-3pBB8bR5A	Minha Vida
UCnwxA62CqAnW_z0n4WLbp6A	Pediatra na Web
UCQdOZmbeT9UoQy8G3zeNE-g	Papo de Mãe TV Cultura
UC0nblCDJx75fBCDDqTCKHaQ	Dra Luciana Herrero
UC8IbAhPglJ1OeC44A_Gtmqg	Enfermundo
UCi2zMfox-UpFGAFfsMXqYfQ	Alexandre Feldman
UCOQ_KwPhg3IZbigiK7NCnfQ	Yasmin Galvão
UCVrKQMmA2ew9LFzeIDaOFgw	TV Canção Nova
UC4JEf2ejgucNsmsFiEy0mSw	Dicas Lara Ferreira
UCDpNPd9fc0fNudJ2_CHK4Xg	Aláya Dullius
UCsNFdDp3O_lhT_QNkMdk4XA	Sabrina Bernini
UCuiLR4p6wQ3xLEm15pEn1Xw	Record News
UCyE4KeQg54Bx34LxQB22xkw	Priscila Simões
UCOdXmOv9s5uQJPfe7w_4Dtw	Família Santinelli
UCOS_wL35NuMn8qLASOQqfUQ	Mari Cavilha
UCnGjlUb4uF2rZWOpd-0x12g	paulotmaluf
UCRlrE2ZyiPLyS61pgJCIoUA	Patricia Bencardini
UCQTOPLEFah0hBCB7dmaoPtw	Prof. Dr. José de Felippe Jr.
UCL41BsrnhsSSXG4zYwqC95g	Somos Enfermagem TV
UCjaWLFTNqLkq3ZY2BJ4NYRg	TV BrasilGov
UCvJ1AGdJwRhGWM5n6D-SX9w	TVCidadeVerde
UCYLwyFQWSQkdOuVnMUEYu7g	univates
UCcnuou4Sjm-qF87yzWve1ug	Agência Casa Mais
UCABvMeFftxjprbpcl3bNimw	luciana brito
UC7XHNGVNCUs_V5B_xWAMQUQ	TV Arapuan
UCCIQoWSB2N80fU7x5ga3Biw	Dr. Marcello Pedreira
UCOwuzVSWrrAdRIviGN7-T5g	Governo do Brasil
UCq7xmFdlNNXgCRIq7G-5RxQ	Vanessa Leal
UCTGVdd_qB7Rz4X4oAKZ0kyg	aphomeopatiaTV
UC88EfXGkc_98Q8XoZ8k9j7g	Flavia Martins
UC6ZSx1wPLaXyZ0yrbWikeNQ	tvsulsc1
UC01Os2Eeg6MCABfv384yKyQ	Josilma Salviano
UC9gmqJKNBOyCl2KLdJIv0mQ	Tele Educa Mato Grosso
UChK2Fhha3BMBVSu8yqCWYZw	ntvale
UCNMwzMh0MW_J_nK9kMS4ldg	Capixaba Otário
UCbrwFkBkzcT9UmskS7g8vdA	Vivacin Clínica de Vacinas
UCrJ_9o1YxOZiSqTCgKXApEQ	Cuide se Familia
UCl4swlkSKDinuw5w5S77m8A	Ezequiel Cordeiro - Hora Final
UC4t2mdI8uAiJDJSRjiWJT1Q	Gabriela Rocha
UCRf1JoNRdPLFWXemwIrov6g	Alô Bebê
UC1RnMyP-HfZCyMLX0TmyMTg	Master D Portugal
UCXQatvGsVCzrm35PnxoHJsA	Pai_xao Vlogs
UCl01kak5i66hCdS_bCxkkgA	TEA Vamos Falar Sobre Autismo
UCh6e1_rbI_pUASvnLV_nyxQ	TV Poços
UCQbKXPyFsK-j0haJE0PGvhA	Aperipê TV
UC5lg8zKcnJ1rnxR6lPgD1ug	TVI
UCJIKKHplhnzcDmpztqUO7nA	Qvida Boa
UCsYo9r-JIEkhoRoc9G5gdpQ	Pediatria para Todos
UCi09l6tPPrtcfL9EOXncU5Q	Stella de Oliveira
UC5hGM-gAk5I8zmn8xUKuNkw	Programa Ver Mais Oeste
UC49x20RykBnDY1RFHkdDnsw	Meu Coração Saudável
UCxbqmMsXory_zC-kNqKHUgw	Jornal da Alterosa
UCmUmPLUgKmHvKvYNnrXMZWw	Canal Profissional
UCS8UJsFfBriLvKUvoSPVtmA	proparnaiba
UCDJlmfZ78gkrO-QkN-damRg	A SERVIÇO DO REI
UCyhRfD3HkB-0VbFA1prxjxw	Encarando o Sobrenatural Oficial
UCplIRjNdaKLVrAS4D-Dil7Q	Donaldo Bezerra
UCV9EVCVbJus_StqIJ89ajLA	Fernando Channoschi
UCghJZXv-Cg90zgdeTZCt_-A	NeuroSaber
UCf2D8X8mRd8-ApAcyoKnTmA	Canal da Psiquiatria
UCPCwZ6sP0cAwgMsGZ23rOYA	NAMU
UCCWZCP1lQxWvjQUUOWc6dFw	Ruth Avelino
UC42k7FI53tnSSIjgzW-rbLA	Mayra Gaiato
UCqF3BLbPXpNGNgsV3oJvDlw	Mundo Autista
UCAJAbdjUtxGM9zaD_epYpcA	TV SUPREN
UCLxU3sH6BpHnqDRBXgGmUPw	renanrob
UCRuR7ytSs0YokBvxr8rM3ZQ	Biologia Digital
UC6RQhzm93SterWntL7GzqYQ	Olavo de Carvalho
UCA2llkURdTm63bBB3nTBw1w	Carla Ulliane
UCjrmFzNfoXO-We5rT6jB4vg	Andréia Camargo
UC3lP5c55UE0ozG-uN0uBsXg	Andréa Werner
UCpuW6sUUE2Y0xW-KZhm347A	H2O Meninas Sereias
UCepEtTIMTtU-MbFHz-pOZMw	Caio Bottura
UCbhT_vtlwr7X2wG6q_0mWVQ	Diário de um autista
UC8hGUtfEgvvnp6IaHSAg1OQ	Jair Bolsonaro
UCNFm4lN_IMhpQ_AfbcQAtag	Meu pequeno Rockstar
UCUM4-KGZEXC2pk6zRDL9jMQ	MyNews
UCBjgxj_j4IYH7cq6pM6Aqvw	Bruna Gonçalves
UCKhy2n1rCRSQNGuyqL-7r-Q	Associação Esperança Azul Patos de Minas
UCLHpzj63LeJ-IoRSGB3V2fg	TDAH - Ciência e Aprendizagem
UCyyD0uZzrvjF4GKsmFBuUOg	Tony Devito
UCOqOdxzU58qOGoysdnVXd9Q	Débora Francelino
UCqWMwhpW-rggQZtfNXIqkrw	Canal do Por Quê?
UCtzAihT3XrcOS-Q9ReyYpQA	Lagoa TV
UCGTfGu7XEakOH2wL1Si2rqA	Leonardo Leao
UCVqte8NBusoopmqjIR3RRXg	Comunicação Livre
UCZNhZ_qzHFS7A4OkKHtgQbw	vinicius oliveira
UCRfUfNEJVaY8AbAcb46qX0g	falandoverdades.com.br
UCXuqSBlHAE6Xw-yeJA0Tunw	Linus Tech Tips
UCDlVDJqYqHYEcgHRn8Mf25g	IDOLOS
UCN1ihdoKXeixzYi7Hyp4WwQ	Canal USP
UC6OUstIo-qXiJzcsJ0toz-A	Misfits Podcast
UCDK5XAOArmsSQKZ_kBoYKOA	Jailson Miranda
UCwJXtk_1CKlCrh7YJDP2uPw	KyodoNews
UCsx_IzBUUYlR5f3lfRiXdIA	A Nossa Família por Juliana&Doda
UCaEplKvlFhyg7P3eBmRtyCQ	acvitorio
UClcatj2SigXMklFrqQtnA-Q	VAI UMA MÃOZINHA AI?
UCzYrkkCI1yvqvQyD-j56RIA	Lucas Pinheiro
UCdvm4HMtgMwRCdkE3I7p6ZA	Williany Rozendo
UCsT0YIqwnpJCM-mx7-gSA4Q	TEDx Talks
UCzbZ2hMCEaD2QR5cMferrnQ	Alexandra Oliveira
UCkrcoalvMERq3ehh5gH5j0Q	TV Mundo Maior
UCYfLDf9dRO6SW0hO2nPewrw	Wiki GLOBAL Pédia
UC1VlEIPGhDqaUsL7Vg__hHA	HMSPortugal
UCil8_HWnWScf4Xmt4FSdU7w	Eli Vieira
UC-WaPlIfAQP3IuydN6dhbhA	Nós e o Autismo
UCW3l9WndLOjhRtsg0Aa--2g	DoutorMoises
UC1LRaE3XaXAanf1XJXgrVIw	LiberdadeNatural
UCdKg0aioEqn_tbfBGz_ltFw	Ivandélio Sanctus
UC05bDtSYUcR0nLkzFA1mCVQ	Universo da Psicologia TV
UCKgnnXJi7Ua2t6b6ByQizrg	AnaliseOsFatos
UCT913ORodTxCG9HdXroYPtQ	Maravilhas Di Noni
UCqALeERk6OhLGaG_PIG_RJA	Vivendo a Inclusão
UCO5eykNr9w8p5eoGQz3AFfg	TVTEC Jundiaí
UC7MUmXqD_kEChxYFME0bdtg	REDE VIDA
UC2qRcwgwOLchPYFPqCCHVhQ	Bosque Oriri
UCYj7NQWLydGknpR7iQSmqwQ	Clínica da Ilha
UCJUhAFvFypnG_E7vWimQQYw	Autismo em Evidências
UClqvSr61scd7sRpMdSFj62A	Georgia Fonseca
UC5xF-T4J_uM0NrCkOO5e0PQ	Amarilys Toledo Cesar
UCWJh6eAkARp1XWCrqNxsRWQ	Papo Saúde Unifor
UCB0zinWfy-dS_NqcOINYo3A	Minuto da Terra
UC0ABb9XMjG8M_rmxbxtW6Qw	Mural Científico
UCmEClzCBDx-vrt0GuSKBd9g	Jovem Nerd
UCbrt8UdV49AqgT7-VaXmlwQ	Dragões de Garagem
UC_Z84H0f59mA9EuC5mlv6og	Canal Fabiana Scaranzi
UCLXl1V6n82Dyg1VhVgSL0nw	Aviões e Músicas
UCUgarxqakK33XeFA4nHG2HA	Dispersciência
UCn9Erjy00mpnWeLnRqhsA1g	Ciência Todo Dia
UC876uazcW8p7wdl3JdbVIaA	Primata Falante
UC65OaKMLtpEUs9BiLSb_u1g	Ficha Social
UCV8ZgEjwdNnZC4_FJtdDFCg	O Fisico Turista
UCl10NIdDOn9MMWdKNyo_YdA	Canal do Slow
UCcI3UJ_rLFMKUrN-b1GW5kQ	Harumi Kawazu
UCqZED4i9O2lBwNZ24bJ91ew	Canal Tribunna
UC7nrDOILJlfqGB8gX0F4jhQ	Casal de Imaginários
UCflCE9dixPqeC_EaSqQAqrw	Refúgio Cult
UC-NwgkrLPYmzM-xoLr2GX-Q	Ideias Radicais
UC96qopSyu7Ga75jW3HEO88w	Aquias Santarem - CRITICA BRASIL
UCjeezibK8QMXYalufkuuSXg	Olho de Rapina
UCstACT0WwMpTjTrbpFYk16Q	FLAVIO VALLE
UCfYrK5JU5EznsnK3wQE7iIg	TV Aparecida
UC4MWeXk20bRyIGQsiZXPe6Q	Tv Saúde Brasil
UC_53VGoH_0XLFmYVpGMvhvg	Curso Enem Gratuito
UCT0JugAtGmqiYkwxFZOwAtg	Descomplica
UCv2svvDbMNunUuPs8hUUKVA	Catraca Livre
UCJWBZ_U49wLgqS5fefJ7STw	Vlog Da Chaylla Alax
UCAcUmC0FOroQoAWA5TlX1-g	Imaginie
UCwVmZjJwkCUCOes5_eAIebg	Fala Brasil
UCp6tx5isUZCgQnvEwbOVC-Q	Câmera Record
UCm17GAihi4NAVEnA1n4WajQ	UNINOVE
UC1Nm7gQCcGvgLyVcGTXp-Ww	DOUTOR AJUDA
UCK6QegB9LU1tIsslcT6KVAA	Aprendi com o Papai
UCUmEPYxmnyQDeRUcFkslmQw	euronews (em português)
UCMPvF9GYUeAT3D-AjEpmd0A	JulianaMaiaNutriAPLV
UC1UHfW5LkMIlz6FHnEHbXlQ	Christian Figueiredo
UCoyhq57ClXRTd4h8vpiMelA	Faz Bem Dicas de Saúde
UCrRLxJiZvwAAWj0bcxdvPAA	Diário Natureba
UClbxmHMltUriVoElCp_izag	Muito Obrigado
UCml_Re6YwhQAI-F4Rwtlqdw	LAbI UFSCar
UCn_lk0txtL2jH6NoVPMb3XA	FESP em Açao
UCFl00VTEDEA0cHCoMQ7CuZg	Rede Super de Televisão
UC45WrWwAypYvlhYbuG9UNqQ	Wolmar Carregozi
UCzzv3f3UIhYZlIeuOl2QH9Q	Beep Saúde
UCeoHCxOOPTeT9Pp_qi8HmHg	Dra. Graciela Morgado
UC3O9y5JRSBqn4YhCEvBys_Q	Dr. Igor Padovesi
UCNmv_2YqryuyhB79ehzOsmQ	Direção-Geral da Saúde
UCP3OzsCj60Z9kZlBPOFXh9Q	PUC-Campinas
UCJlShHvhjZ464BnJ8yrkeJA	Hospital de Base
UCCD5yY6oDcu-PvLnP4FIJ8A	Vida Melhor
UCcVeBJf9jm5xgZbs7rrLUPQ	Legislativo PI
UCSVt-nsguS0hx3d2N37E--w	Centro de Documentação SES SP
UCNX-i6w11LltMBn66PacOfQ	Podcast 2.1
UCDbSk1EuJeXL2sCis8cvo-g	Lais Biolog
UCV306eHqgo0LvBf3Mh36AHg	Felipe Neto
UCcSJI9MVSPEhKt5OnOv2Mdw	marcoaurelionunes1
UChFmohIxapcro2kigBCT_AQ	Camila Delmondes Dias
UCrOvuxLgXoH35EwUh9kRceg	Jair Tabchoury Filho
UCKWtY_NSa3xTkz0YT28QNSg	Enf. Leandro Bauer
UCR418yAQHUxufBCGUmwLMVg	BAB Channel
UCj0aH1oJz-m3n6TDW-Ly20w	Saúde Dicas - Oficial
UCHksAPatc-89V85O6KgGXTg	RTVADAG
UCT2X19JJaJGUN7mrYuImANQ	America s Got Talent
UCvgfXK4nTYKudb0rFR6noLA	UFC - Ultimate Fighting Championship
UCsTcErHg8oDvUnTzoqsYeNw	Unbox Therapy
UCGwu0nbY2wSkW8N-cghnLpA	Jaiden Animations
UC789h3eqw0H1HqGmIsI26OA	TheMacLife
UCX6OQ3DkcsbYNE6H8uQQuVA	MrBeast
UCwO_xoYm2vjhu4kZSxFO5mA	goonzquad
UCMNmwqCtCSpftrbvR3KkHDA	Guava Juice
UCZWlScCmjiezyIRAybUgXYQ	Film Independent
UCilwZiBBfI9X6yiZRzWty8Q	FaZe Rug
UC3EFKdXAU99j3ppGgvTz7XQ	Bretman Rock
UCEWHPFNilsT0IfQfutVzsag	Porta dos Fundos
UCh7TUTXojlE8vRtb-EnuDzw	Metaforando
UCbAiIkPobUFy71zlmwVw3jw	Fatos Desconhecidos
UCtrjFP7i92_30uv6IehwE5Q	Cadê a chave?
UC-6xqzMBF2CXTImn_a4aCVg	Jornal O Globo
UCbeCLZ2E_oD071BkTCw5uRQ	Bruno Dias Jornalista
UCjjYaSHsZSUNTSwUV8OfOrA	Planalto
UCun1gF57-Kv35uXZQ6Bn78A	Revista da Cidade
UCsgHWN8lYveMUEWTDheTjZA	Brasil Escola
UCPQqOZhDKr9AjLfXDOjoaww	Mundo Bizarro /Jr
UCQNi2fXhCHRu8-b-w29SMCA	nutrição Alimentos & Cia
UCLWAkPY5RjvCuwJu_C3Ok-A	Juliana Priscila
UC7qK1TCeLAr8qOeclO-s39g	Terça Livre TV
UCQz-h9kq50OxKmU2yGoOWlg	Fabio Click Time
UCkSjy-IOEq-eMtarZl2uH1Q	Mamaefalei
UCSyUhW3u3JazIT3VtE4nCEw	Rômulo Maraschin
UCr0NQAx7C64fOrNxVdc8gYA	Firmeza da Verdade
UCyCMHHF9TRBEPhzDwDHDZEQ	Biologia de Verdade
UC0otZdGYsA9KqVKAcn2peQA	Brancoala
UCF5OxapO7zJUkX9EYvGwN_Q	Fatos Insanos
UCuxfOdbKQy0tgGXcm9sjHiw	Coisa de Nerd
UCj0O6W8yDuLg3iraAXKgCrQ	Você Sabia?
UCgWOsOjYMJyndvwyU9gzBKQ	Universo Curioso
UC13ikrGSy3E2AveqLAI9lqg	Richard Rasmussen
UCjWw8sBL0PPZLPxusmNLvAQ	Legião Sobrenatural TM
UCzGwyAyWLB2Si6VDFpq8rjw	Dois Dedos de Teologia
UCJWCecuSUa9CsNQ4MGJ_g3A	Rocketz Labz
UCweLVJlESUt6fCdDFeDXgcA	Felipe Castanhari
UCnU2EtUW8Z4DxSqXxJ5cMQg	Cellbit
UCk5P5ft8WxlmBrvwmqmYLwQ	gabi reborn
UCaSAM5kna2KyX-uVLSGr8PQ	omeleteve
UCOX1xjMcnZVmV-yx0VC6Fvg	Dr J Bussade
UC2oZNzo6o37qejkFQE2dIAA	CAROL MOREIRA
UCbxeWUKWro8bMscsa36-BtA	Zabetta Macarini
UCTe18hXXnFNL7FDdnVfIqEQ	Zelune
UCpwFulVhWRsS92nYOTdh-uw	Mari e Tha
UCgheXPYps0uCdB60AvUQYbg	Magalzão Show
UCyG6SY3s8fS7ZKje6lv1JKg	MSFBrasil
UCwumfjrPgLl0H2wS7juY5Xw	Fundação SOS Mata Atlântica
UCKXlbJbeAb8uTdRHJhlwE1g	Canal CAPSLOCK
UCYALxwppPJjYyTMEwwEcNCQ	LubaTV
UCT4jm6o-mUMuo1bKHcHSIfA	izzynobre
UCvNbTU5NSQ_K8cWfY9OmWsw	TV UFMG
UC_vFhB8UkkdeiOOOZTeXG7A	Diy com Fabiana Nogueira
UC_er6_R1PKUCxc7QSXxIvzw	Sua Saúde na Rede
UCqyvYqXCsDtgMUGHEsG6ERA	Nildomar Silva
UCskf1Ks-24BGZctXlN6QYwA	Rosa e Blue
UCNjPniJ9bZuCDQXCRqNsCBQ	SAS Educacao
UC0Q3GfF9amdyyjTA9DpTnyw	Canal Saúde Oficial
UCrh3PVCJvakmb7t6_XhPLcQ	telessaudeamazonas
UCXLe20604d4XVV_Z6cQc-gg	TV SIM Linhares
UCDo7hEeMTMHLJxRu5fnbXKg	TV ALFENAS
UCm-XT_NupkfP-19ZE8QJACA	My Pets Nanny
UCBiZg7ojHPU8ShY7s8xQ6bg	Balanço Geral Curitiba
UC19aAr6UojQesIVCBsXJGIw	O Que Não Dizer Oficial
UCPU9R4M0Fruz-E2Vo9KEmAQ	Hospital Samaritano
UCsRfBAspa72ExrsN347W2xg	SBT Rio
UCLWEHMfQsBVlIEQicwXtb1w	Mundo Caipira - Rodrigo Matos
UCsQbqbLY-uvbXSCXinr5imA	Grupo NotreDame Intermédica
UCvi6qsQ6iqHWDph-ckhX5GQ	Canil Rott Haus
UC_rnNJR_cCfi_p-UMjtf85Q	Ped BiociênciasII
UCQ8Rk_c5tzYeiTzXH3nrqyQ	TV Costa Norte
UCr9Jv4BCx_EZ3-RiuYwQXqg	Gatil Hauser - Gatos persas e exóticos
UCcu3pbQumWatGNPvV_2RyPw	Délio Pinheiro
UC0Uzow4iFA8PoIKE_U2rmeg	Televisão Atalaia
UCN9eb1Z__4hietbXmwxOglw	Natureba - Curas Naturais
UCgDb_6JF3elI2CFR9SqSbwA	João Carlos Baldan Acupuntura e Saúde Quântica
UC5eWe0ULMB-T72sAL5ybArg	Autismo.Apoio. e.Desabafos
UCFiEI1kDHlO9UQtxx0wj-XA	Minutos Psíquicos
UCfIlLA5vyrS8PgzSOKE2GBw	Doce Limão
UC33LTYvNoNvpx7D5qezhxew	doutorbarakat_snapchat
UCgfgPyU5Vc4s1tyBSM6CCvw	Fala Fono por Juliana Trentini
UCujBU_iFv79ae1QxiBbQkPg	universobebe
UClGVPnkZ62SuUbE4EqTDIYg	Instituto de Educação e Análise do Comportamento
UCLS-udF3quRKFcnQTpjmrRw	Henrique Lima
UCuFi5ZBiy2IgvwVRRhsazQA	Autista Sem Regras
UCcpEuvf0WL27bLso2tK1DLQ	Mairy Ribeiro
UC9Xzfea9PyVFl_jmbKVuxAg	Paula Penteado
UCewz-5dLWu_rswIMStBBI1Q	Dr. Ícaro Alves
UCzDQaYfHMJrXfw46whk6hIg	Jolivi Saúde
UCAcm_kK9LeKsqntNX_5J9Rg	CARAS Brasil
UCZMequcevIbkS-_LLAizS1w	Nosso Futuro Roubado
UCoPDcjdXmHCFyW7Pz9DBCOQ	UnisulTV
UCmQK52xYtdeg7EYiQhqEeZA	Body Mind Zone
UCwobzUc3z-0PrFpoRxNszXQ	Yellow Brick Cinema - Relaxing Music
UC65fQy9R2Ni5npZtbotAIRw	Jornal NH
UCnyFZr3wJBAJRjcqr_Q5Gug	Centro de Telessaúde HC-UFMG
UCC1_Drela_P4MAW8pPcdjSw	Julio Pereira - Neurocirurgião
UC8Ciiz3QHgziGJXa4BPY7sQ	Vencer o Câncer
UCSFQIz7KvEWSwuCCh_zh_0Q	Renato Sabbatini
UCY3bccBm-_J8m0-SQz2AbAg	De bem com a Vida
UCEKBa8byszeoA0f7lt1ledg	TV Paranaíba
UCCUJDced0JrM5EmfdnhuRJw	Daniel Cunha
UCg3fYev0mdtUvJvFJpQUM8g	TelessaudeSC
UCIR0R7T5KX7jK0EWxgLtndg	Universidade Aberta UPF
UCuSEQ1Ebc3lS5FrwGKpbtkA	10 Minutos de Saúde
UCeGhoo58OOV262hAkG2eBnQ	Mai Rob
UCo9oJoBqutAtWI5Jb-_EQWQ	Diego Ferreira
UCeDX3cRwyEND1InTK4Iod2g	João Carlos Baldan
UCGm27Ndv8a-0yUJFVpRwkDQ	RedeSeculo21
UCUavbFpmwM4WovWqgf0_B4g	Hospital Santa Clara
UCl4jPGdW6YDo-1KgU5q8T1g	Avv. Saverio Crea
UCfEQnRUpLwlf85pcXBukT_A	EFCAS1000
UCNy6EtpfR05_vGNPkb-xQBA	Danny Martins
UCjleHngOtF8tgqXXRhQucCA	Saúde
UC-RhfF4_tepYCgSZuGLSzpw	Eduardo Salomão
UCemIxU4HzIhVLeohT7eUUoA	Psiquiatra Fernando Fernandes
UC5Bh3Ljo71O9uML6paQVAfQ	Instituto Butantan
UCjVPaRkoIgq_Whb1QkJjGKg	Dr Lucas Fustinoni
UC3UMFl4FxufRp6YErllpxHQ	Metrus Instituto de Seguridade Social
UCecR2Q4C3RJxAr7joOKNxww	Dra. Joely Pucci
UCZ4wREznHPRuUz-ghmp7KGw	Professor Fernando Braga
UChXNyp6dL_aY_3qwVgDd-EQ	Dr. Fernando Lemos
UCz84Tivi_d214XXnxGbtKHQ	Jaime Bruning
UCrrnW1mAQosrbtRrFjZ31wg	Canal do Elias
UCDoPuIvx88nh69fS5VJCNWg	Ciencia de Verdade
UCx7HKmnCIIbRBF2FjAoV0bg	Débora Aladim
UCiW6oCC0c_705F_BOWOVUKg	Mamãe de Dois
UC6nYtmaMh43WUQW5YeopuNg	Eu você e nós
UCTFCMkTZPwi_PjerXYxDscA	Sweet Carol
UCQq1CfzTvBRn3l4CYswnMcw	Juliana Inventa Moda
UCFPV1zBY8TVYEnjMesCf17Q	Terapia Cognitiva Online
UCXTI4ER3d0UPT4WxFYI082w	Jane-Six Psicologia Social
UCT3P3oWIt21UsHi_wwDG8Yg	Débora Moreira
UCJS-Vcf3aR_vEX5F7oPIqnA	Nei Rodrigues
UC0bD2v2yi9WoiupiOMV951Q	HUMANÆ LIBERTAS
UCA6Roeo-qFVk3jvjAdag7Uw	Cocoricó
UCPaL0Om2geEJyjncqTGm49A	Tiago e Gabi
UCoU-1x87QJJA2mA9iQpWiUw	Mamãe Felícia
UCtzbjh-OJFkaHqSjvWJs87g	Inferno Astral
UCZh5UuRs3JNPQvAcJ1UQQcQ	Eloy s
UCQKBmUf2GZUXRQFpzCPN5og	SP no Ar
UCLOJpGk3n2cACK7NzvmRGog	TV Princesa Varginha-MG
UCuQ_uyOC8xbdo2M-jNZfM8A	Nós e o Universo
UCWeDz9iYFe7APda1DFMHLtw	Toque Materno Vlogs
UCdnQnmMRKFOI6Q1H7awdMuQ	SaúdeMG SES-MG
UCP8XlGjPSGj8JkuZ8hgDAJw	TV CÂMARA SÃO PAULO
UCuDagVc79VVXXPFJurgXIiw	Ordem dos Enfermeiros - Portugal
UCsdIGtyuyiW--cidQQ6KUsw	Record TV Goiás
UCamgdcs45ToPrIV7wmT7iYg	afpbr
UCTH-xd88WPq7KUjfzI9J1rg	Doutor Informação
UCU8Y4bqcr0unUI18EcVmo4Q	TVM
UCmOqIaUBwlSK6lVGC2o46JA	Eu Ciência
UCphn4Z4L2dGNoh7jz_99EOA	Correio do Povo play
UCxm7PwK74oVJtyP0vN2qQIw	Multimídia Produções
UCxjXoEYzVFwvKD53-gvxhYQ	Reumato TV
UCV32l4Xk6vXOemE60pZ41Sg	Secretaria Municipal da Saúde de São Paulo
UCfRVh-QaAzJ45hmNmlwT32g	Meio norte
UCi3erzjE0p7H3CXsQNITzzA	Ozonio Cura
UCKwQfdV6NP-AAwbRtRJqwBg	Rápidas Pinceladas
UCIFYUiFUWCQzDc9nc6KY2Ig	FOGO VIVO de YAUH יהוה
UCoB_4Ec1pWpcf9mhyPfyvlw	Alessandro dutra do nascimento
UC2pQFYIrk5mg9x-LRM9TzYw	Super Spectro
UCtEEov46xWiYPdcJg-frWtg	Irmãos Mach’s
UCOFMoDHG-vKXs-f5vcG7JaQ	TV Clube PE
UCUw7hCgpimep4N_oEmG7G4g	MICHELSON BORGES
UCCYxMTERB2LuzQPhsizT1cA	Negócios da Terra
UCV5oxb6HtQR-ZptUGtnoPZA	SBT Nova Mutum
UCL5NH3xftKuwmPbDwkZ-RUw	NDTV Record TV Itajaí
UCNCRt4-OOYn34DOyYLCFWtQ	autismoinfantilvideo
UCXQHQFA87heyfElr-XajQPg	Net Didata
UCjFAEaZfULixCSOCIvY9qNw	MMarchadorTV
UC5ACo310tjp353abzLc6sVQ	Felippe Vanessa
UCoi5cG7JL_kZ-LGW6-PtZ_w	Meu Anjo Azul
UCJl_ERzQBci1wgg3UdM1bVQ	Falando de Autismo com Ana Paula Müller
UCIOosFcrtBhEwlVeGcYSqiQ	Rede Super de Televisão
UC1r7Gt4v-OD8domIE0Vw2Zg	Papo de Pai
UCebc-KBHO1FHPLC9HvTVZ3w	Resistência Contemporânea
UC8p1vwvWtl6T73JiExfWs1g	CBS News
UCJglPPxxQQtFg-78dIkRqNg	VINICIUS FLEX 10
UCsrp4x3d515wkisfLk5NM-A	Everton Ricardo Bootz
UCTrx5uG9vJjTLloAH8hE-pg	Macetes de Mãe
UCsPBsWBocgY1BxKS0FVca0g	Sabin Medicina Diagnostica
UC4p7d_1KehpvAb7_9-WlkdA	TV UFMS
UC1M8HoHfvAfBpNnkGoMxX1w	Manual Do Paciente
UCw8XEDi4jTvxcqHBeWEsu2w	TEAMTubers
UCqGCcfns6j4zlcAODLOeMDg	VEM com a MÃE!
UCusU4yDmaY2LQIXOtxT43VQ	NE10
UCL0sWgefmtjUNvtBafXQmhA	Jéssica Gomes
UCNa5CND4GBCDxwHFB51EAbw	Jaciara Petry
UCegeG7JEKeXThmcZ8BjtvsQ	Unimed Londrina
UCpvhFBKf_dacTd8NFRgcTxQ	Priscila Faria
UCAAqC3FgQfWxu_ui-1gynzQ	Brazil Heath
UCRZqMrSXANo51Z3CJyOSbJg	Luiza Cervenka
UC1xM1iuftFCqlZO-omXZesg	canal meu jeito de ser mãe
UCcRcXycIYgXJcxiur0pzLPg	Jessica Sousa
UCIWKfj-9SxZetO6DVzDIlww	Anna Krystina
UCOjnB2Ul08J7jM9npAvo6EA	DECO PROTESTE
UCqLpSeS-N7XDLkyta9QjHbw	Planeta de Livros Brasil
UCnvKlvhQsxsHW8bUaQ6MVZg	Conselho Regional de Farmácia do Estado do Paraná
UClbjlUoxxs-Lc7V7tNVa8CQ	Assistência Farmacêutica Avançada
UCEdgNBcBybRtwv836C8El4g	Arata Academy
UC74icFVsxTFr2BW3Vm8n_iw	Gran Cursos Online - Concursos Públicos
UCaNOyWyEVojnz4AolKeDFFA	Mercenarios
UCCgQHdB2fjuHB9a36UnfCKQ	Canal IOC
UC8Igvj1lmVd752mKI0Rk_eQ	SuperPoderosas Band
UCBL2tfrwhEhX52Dze_aO3zA	UNIVESP
UCwhBXTzLj1amtu1W-7WMW1Q	Brasil das Gerais
UC0YtWlcM-9XEt8NTXI1HAOw	Opinião Minas
UCVVIVc6DfU8uWJ60vk8iKpQ	Superinteressante
UCysFgzeqkdh4FU3g3jUvCbw	Liliana Delfino
UCE7USICb6dF0Y968OlJ61LA	TV e Rádio Unisinos
UCJXAScTUxxfPzwLzZc3VUHA	Canal ProjetoX
UCqnZW-G3y8afNMyYb821u6g	Saber a Lei
UC3MmhFxndlz10oOgXvuvLPQ	Dra. Carla Frohmuller
UC-TJtIntyZTj34lwLdSo2xQ	UACH
UCw3HLkyWjI3tD1RQTGEe8LA	Pedro Cunha
UCo8W6UskksVPEfNj09a9dMA	ThePetroWorld
UCCq8mh725qRQn8g2_PvibpA	Carol Lima
UCijEMORybIdM0CWLJaHjQGA	Brunna Cristina
UC_gV70G_Y51LTa3qhu8KiEA	LUCCAS NETO - LUCCAS TOON
UCB9iWAdLYM9GzeKOaOBYH2Q	Boi Saúde
UCGbDaS58FGh45Oq4N-Qfhdw	Dr. Marco Menelau
UCwHCkGOaMvG2kz7b-jhi2qA	unespvideos
UC6weCvYc5fRFMT0-BgYJ40Q	Programa Ver Mais Blumenau
UCliydr--ExoKG7LifaCht2A	Me Gusta Bio
UCa-AC7YhCP5u5yO5aNjKjoA	Ministério Zoe Vida de Deus
UCSzb0SUkHLsbupcOnjwpPdQ	TV Revista Rural
UCQ1LWE9p0i3HxIpDZjiOKjg	Emilly Loise
UCnQeN_JtknE5o6NHZeOMpXQ	Fashion Dog Italia
UCQQ6NJAgnvxFyOxhoREtGdw	Secretaria da Saúde RS
UCN_Yp-5LABpTC1qLls2PXAA	La Chimica per Tutti!
UCwfEOn0O1DWcyTgzVVu28ig	Marília Mendonça
UCL3HlT99aQ1004ojA7u6ETQ	Sottosopra
UClylplTLDuf46pVapBO12_w	Leonardo Paiva
UCYSslASzgHQ_F_vuTsmmi-g	Cura pela Natureza - As melhores dicas de saúde!
UCr-BdJEeyDNlPodHF1pUKOg	Só Dicas Naturais
UCW1XnMs54E_N9UQmRxVhSCg	TV ABROLHOS
UC9z9JemVpHB7BJtXjESAsOw	MELHORES CENAS DO CINEMA
UCO3YT7cu0cxd8gSQ6nCf0qg	ISTO É INTERESSANTE
UC5KkuUqkQBF8yD3xqbLMigA	Aponta Vídeos
UCcs0knrjjReJHuF5lsBBbiw	Igreja Santidade e Arrependimento
UCNbBZt5B3cSrqjmYSecmU3g	Rayza Cavalcanti
UCf4kyk1iMd03noNbDU2nNOg	Remédios Caseiros Marcia
UCvm2Fxo8EavRB59AVNF7F2g	La Verità sui Vaccini
UCCSQ6Dq4FDyN6rgWCt_uurQ	Fondazione Umberto Veronesi Channel
UCoC9FjH7GgWoPIYfr8sEJdQ	CEAR UEG
UCakzOx146XgjzmVkK2xyX6g	Dr. Paulo Mendes Jr - Otorrino em Curitiba
UCDc7usncQ0XtzIhBQOrHZ-g	Dra. Keilla Mara de Freitas - Infectologista SP - Regenerati
UC2visps0yULA5lnn5Yjne9w	Viajante Independente
UCi0LsOhnyJbnnN4fgmxhLCg	Instituto Sempre em Frente
UCXgrwFrZfFQxwhdbsjYmwTg	GovernoRO
UClRUPXBd3zP3O1KCSeiMA2Q	Thalita Campedelli
UChFIPDFYjTFg03eWlwmQcTA	Telessaúde ES
UCG0kQTTbkKjkKCMbWEIeUnQ	Prof. Cássio Rossi - Coach de Aprovação
UCMT22yw2FIvF7dW6dJ_6EnQ	Pro Matre Paulista
UC-6_6nA-v9W057U5sX3tTXg	Apure Guria!
UCDK0tciqGDB3Onhs7JJfimg	Criatório Neves - Rodrigo Neves
UCHajNRSj7qejzsPx7o2MHDQ	MontfortAC
UCdRdaVD3_JxbG7R4c9tembQ	Inteliogia
UCzp_5fGv8jy8uf_Jl46nR2A	Marlithon Oliveira
UCJwqS9dQlV62tpNkqbNTZ8g	Clínica Higashi
UCpZO2Fi6cd_PXZNH0yeGjSw	Canal da Saúde
UCcFgREmujdPHvA7I_VOmgIA	Área Secreta
UCpKbjgVXitTO7mIkalr4-kQ	Ulbra TV
UC-qeHsCIc4DiYhmPq7cmLkQ	O Curioso
UCaJqv_9-pPiWRCI33WQD9ZA	Detox e Saúde
UCSfmJw5USzP6Ca-uGPPsNRA	Portal Saúde Mais
UCnH3v7ENZKWTqATMGdpKxBQ	Canal do Pava
UCIsrnGY0LfR4OT_PkfzAIJA	E Se For VERDADE?
UCtvvTFp0XANyllOdmzZr9VQ	Casa do Saber
UCQET9CZdh03jWnpY7WY25EA	Mundo ESPN
UCOJNw9aHGRkYuIOqwU7yK-Q	Mundo Sem Fim
UCpLR-q8rFLe_rEAXf4PRxRg	Daniel Lopez
UCJVTsYjG0KLNWL6OyHx7ZGw	Nexo Jornal
UCOO3a8hkldq6zGAOxgvZndw	Nightmare
UC0NtqwtL1oLxwm3lx_Uo5Og	Politize!
UCRuy5PigeeBuecKnwqhM4yg	TV 247
UCzjtGnD7qqeaHW3nvDVrjQA	Os Pingos nos Is
UCI4mls1kw1nChubkbVeRLKw	Lions Clubs International
UCg7yfJ8e1TRqyA1tSkALyzg	Professor de Atualidades
UC52YPxBsiE7Xcf_53WYXvTQ	Gol Contra
UCOzxzEu70fNClG-9nNi4Yzw	CRISTALVOX
UCllbSdCRAEsPGa4JpJuLZHg	fboyt
UCVqNUy4-FTLMwMKX-krfB6A	Marco Antonio Villa
UCnZOYk5co0M7hA5z1ML_45g	José Nêumanne Pinto
UCjSgG4M0KM0jDBgkjwFVrjg	1x0 Feminino
UCxy9I7D4Q8VSx1wunLsntOQ	Paradigma da Matrix
UCKfap1xgEqqAhN7jtYgDsYg	Paulo Almeida
UCAGWqQrxEF0Jb35zDnNaLgg	resistencianom
UCjnw-Wmtd7O89zlFSh1O2SA	Filipe Martins
UCdsgzVdqZ9Muii2OpR3t_ww	Toni Dozane Oficial
UC9npsqVPOTyKQK8TiVDAe2Q	Americo Moura Resumindo Tudo
UC4aOaBcNPsZlSREx0p71jeA	Cinemátika Filmes - Produtora de Vídeo
UCi0ftpk_k9UhC2oNrnxatNA	Band Amazonas
UCDfwywWnYoB7sHPV5udsj0g	Ju Almeida Pet
UCKdLc7eF38cS90Kug6bD2gQ	SBT MS
UCJ4uxK_mo6gNoqk9cyvgWkw	TV Correio
UC8QNlbRIeKQsbG8u_qIzowQ	Eludicar Centro Pediátrico
UC2P4D6uHis-ENplUEPyK4tA	Sinal Verde Caxias
UCtgFbv9VEh7IOw3vxMAP43A	GINECO SINCERO
UCWRwxOGj58_MuQ9DTV1ylHA	Esclerose Múltipla Rio
UCEA5mVrH3jPMmuah5qD0DUA	Dra Monica Valverde Viana
UCJZOLak0v_pR6AjYsbyAoog	Canal do Mau Hálito
UCwHG6bZ-zd9tffVc4QwtOoA	Tv3Fronteiras
UCUBpKLunWjAECCw1yuY2dww	Record News ES
UC-g7_TRxesywauLDNeJ0DmA	Dr Web Seu medico virtual
UCVWZvc0z_WE2JTy-6y1g52A	Comunicação Taió
UCupEIFDJHe9c_KF2bazgKkw	Viva Saúde Sempre
UCdWWan__ZRGzfVZ81nfE3KA	Conseils de famille
UCBpwS_TPjdLt_FLgl0ZtZAg	TV EVANGELIZAR
UCNccY3N0vCqRlBcg-OOrzRA	MD.Saúde
UCaPx61H8Gu9a6Zg4riqV-jA	Jornal Hoje em Dia
UCDxm_d8VSOd68Udl25ycU9Q	Prefeitura de Valinhos
UCWdXgfpEIZIGzah9_yCL-Xw	Saber Filosófico
UCQGAqLdIBfVSB5qzTtT-Urg	Juruá Online
UCYQHpNEyjWsGQb06RJa4lkw	TVC HD Canal 13.1
UCyCZb-wsvM_VFKSbyKftgHg	Conhecimento Bigode
UCf_SYqbShDoViewDGxaj2BA	Nova Visão TV
UCQkzzY4zcndB6d09MKiP1yw	TVU RN
UCyR4dkya5rC7ZVJFNBrOMrg	Bem Estar no YOUTUBE
UCAVq36KDhPluroMCL1BZhbg	Painel WW
UCyxHMt8QHJgsvLs-5VF_fcQ	Doutor Salim
UCi0LiEbZBMe846Fapo1OcqQ	Independente
UC3Jnb0QsCR_kRMV7RhJ7whQ	Iris Vivianne Resende Mendes
UCPHXtAKuUXPOwdEUzMgSD0A	verdadeoculta
UCBGwJ-nEfpZFrckezomBD5w	acasadocaminho
UC8QAdpiEWAOg3AOCCFDCOYw	MBL - Movimento Brasil Livre
UCSBSGWNP1RK74Wh7XYex_Gw	Peruvian Mav
UCzjtxsipnNDEPbZXqWv-fgQ	Allan Kleyson
UCBMKrkHv07GoYb5ITLt0sYQ	Filósofo Paulo Ghiraldelli
UCC6f63SXY0CDpsPGDBtTWVg	Henry Bugalho
UC-GUlZA9SFdyl6RrQP3A3qQ	Tia Cris Pediatra
UCEsbaUdrM_87K-2um30hf8Q	Jovem Pan - 3 em 1
UC9sV0ieuVY2_K4LucZf4yow	LiloVLOG
UCVUF80k8eY8T5-18TPL9xDA	Cátia Santos
UCqAjL4g0-FJ4-aocsfQZkZg	Daniel Mota
UC3gQ9lIiPQj7frT5CE5QyRA	Samuel Borelli
UC2m7CnTMT-AMH5w2IgBURnA	Italo Goulart
UC9HT4JrbO6TSfjDHTzFgbPQ	ENZUH
UCV2kagEmsbrO5lc6glH-8jA	Diário do Centro do Mundo
UCYmHuI1yrP_pkSsJlQRCi1g	Libertarianismo
UC-l4Sv-gy98g_NBasXEEcGg	MrRone43
UCPkousjreAFvcwhywDmIzIQ	Canal Monarquia Livre
UC5nLISkLI9zsaMHp4YBYTFw	Psycho Mantis
UC5z5hsnZOZJH8vFacP-9poQ	VideoSaúde Distribuidora da Fiocruz
UCUM3sPhW0imgz5SQbl1Ewyw	Verbo da Vida Mossoró
UCCdnN4v9Fia0pjUzYlUBsGg	The Children s Hospital of Philadelphia
UCGo3vjM2Ll3XujL-zYT5SMg	Ponto em Comum
UCp4OXwfZE1SaCQ4jRAuaoXQ	RNZ
UCQpTamaG17Gi1wI2teLmJaA	RESUMÃO
UCWoe_w-oadmQxcXZV2KMZgg	LordanARTS
UCGCZAYq5Xxojl_tSXcVJhiQ	ANNnewsCH
UCHbGJ36_GFxqzZbWxqAn0zQ	Hope In Jesus
UC0Q4ZQa1Jx0l48xqPCZpDGQ	Nith Treinamentos
UCefDGwi8OyLaXnYRceTZjFg	4USA Florida
UCT36pUBzORCbhpnApuWLtUw	全国子宮頸がんワクチン被害者連絡会
UCaOeb8m3J2H5bLScFDpyq4w	Fantástico Mundo De Dani
UCYMzwx5ov-dgB_sB6FHvNZQ	Nunca te contaram TV
UCbHRDtYcy75lsoRdZ2h_24A	WJBF
UCxG1mll0wS-Q_ZvQ8rJuqag	AKEL ESCOLA de Jesus Cristo & Universidade EX
UC9coa4eWvwznczn6P-RXLwQ	Joy Arthur
UCHvDONQK4hL1_7sgIMg0iPQ	ConvergenceScienceNetwork
UC8Qsmosgqp1rVpMSmaAIoWA	mametarou daizu
UCKFKv33ofAtflmz0C-TKnQA	Em Busca da Verdade
UCBbDQqY8W_ZwffWWqjyRbXQ	niedja lopes
UCckVaSXWw4Zbe_Sz_SUwhBw	SAÚDE PERFEITA COM KIKO DO BEM
UCh897BiM_CQJtK2gL29tYSg	clica que é dica
UC-wcdrzucnlKGBjyEUaEWaQ	Morning Show
UCgSIQgFmDXYUB-oDsrNifiQ	TV Cachoeira Novo Tempo
UCqvGEQ2q-gScRQpl158SAfQ	MEDICINA COMPLETA
UCsGzj2UYih1rr91iuFVPKiQ	Blog Experiências de um Técnico de Enfermagem
UCooHPZW1y9nswIiZuA0EORw	Naturais - Cura Natural
UCcyrEfqNzo1AWnC_PPA4rzw	Daniel Mastral
UCol52xtoFqjdeW2t-JvLkeQ	prosperidadeshop
UCfMqB9cB9RfC1r2CMPnYDNw	Palestrante Tiago Rocha
UCB64lmy3pK38sjYIVjiZN8A	Cizio Oliveira
UCgrLZ1vLKak20iMSxK13C9w	Tati Braga
UCrSYAKKH6gYD04KA-0ZkLAQ	Isabela Soares
UCeYMquYSGFQ6ryJQ1QWxn6w	Markingguitar
UCLJM5tW9y0KpbKo-F7-kGEQ	Argumentos Veganos
UCDgyuBDJGp5TlDMubeI-QdQ	Paulo Andrady
UCYhTgGdeaBbbZ-h_LVJ_6bw	Pesquisa Fapesp
UChsb03kH_dNRh2-wE8GkeaA	Mundo Desconhecido
UC_Fk7hHbl7vv_7K8tYqJd5A	SpaceToday
UCIirjo8OWJBMLfV_peBD6RQ	AssombradO.com.br
UCBrf8ddDbkt70nWkJHlc42A	Leila Maria Felix
UCilO3ZOPdzgmccJg_NpJ5XA	Kenya Diehl
UCfwxLOjkmp3gSEB2KCYhOlw	ESSENCIA AYAM EU SOU Espiritualidade
UC1ToYrGtIHCpTA1FtJ-x0Lw	Luis Andrade
UCa-E_TdolbgVpKNpCsw9QjQ	Marcio Pacheco
UCzTpvt8Wv6ODw4nl_6IDpjQ	Instituto Farol - Autismo
UCgEQYViKxwa4R52M0-NnJnQ	AUTISMO NOCAUTE CERTO
UCq9ActwA2TPkO_QehWtGmpg	Projeto Amplitude
UC-er6TPk2_XAfbSz-mPs3-A	Congresso de Autismo
UCGVHUTX9cPdL_WRYzcUJS1g	Lugardevida
UC5zdbrXhirdxV5blrkwe-QA	EU SOU
UCiqYqf5bRYRMEW_CgXhc7Vg	Maranata Restaurante
UC7vm7VeoQ_q7i6h_FjYkHuQ	Os heróis da Lua
UCxJ8B-O6H2ottFrNKW-fgZA	Roberto Andersen
UCnPjkkDT0uVuaxXfhyhkR3g	Nathan Vidal
UC5VvsTwsyKWMZSQtt1MPCEw	Ana Beatriz Barbosa Silva
UCBbpXCnWttleSMNWTAo5oQw	Afrokids
UClJ5Bbh2XjqUxY7kL0VcdDQ	Aldo Primicerio Quotidiano Medicina
UC02rt6F-KrUkOUHhWNsJPMw	Canal Kelly Almeida
UCGUMq1P0Q0G9UkIZIb6W5Mg	Leticia Alegria
UCC1sHLVCWUBP4qmaZ8WqPzg	Bianca Santoro
UClXJT92i1vBvC51l00685CQ	Décio Simão
UC2ysTeeBjznIDRKaRs6yyHQ	Katia Dolle S.L.
UCJoCHT5SDyRL1EHdFpNerRw	Rossy Tandann
UCyaAfND-YKtSQmSk_2dwvYg	Dra. Regia Gasparetto
UC1iT5pP9zH8SYzpiEXK9I8g	Lukinha oliveira
UCquOzSBI-inhOTBgz-glU0w	Dicas Naturais Online
UC_c04hMm-Dmeuob61h5rZtw	APOCALIPSE 21
UCl3pbBstPZJNgLtFX4VzCwA	TDAH Descomplicado
UCx0NPZYDVFFcBC2fVk1VykQ	Valéria Morym
UCzMqxW3rrGH8t-hYprCCw2Q	Alexandre Costa
UCD-A5Pr7MO89tCftmDkkmjg	Mamãe Moderna
UCqKxdaqQOfXheSPlklE6Ukg	Ideias incríveis
UCT2iDke9SuPfp0XO0rr8YSA	Caio Fábio
UClmKoaOV0xdb_2HgKNmo5nA	Carol Santina
UC376n347Ob5Lwzq2WGzF1AA	SBT Jornalismo
UCi5_KLjyGPF4u5htAkzI16g	João Jonas
UCInWfLSA0oXG60F5O2HnGEQ	Lances 2.0
UC9U4nIDyIzzelXrjNQXNvxA	Pânico Jovem Pan
UC0f866RMRdL5mSVnipiOHxg	Canal GNT
UCawdyxYFwKZmB4IbzzPxMSA	Ploc Social
UCc7rfCbP90qiw3BgT-Iqc7g	Governo do Estado de São Paulo
UCkKQLj-hApuDB5JOGNa6B9A	Balanço Geral Blumenau
UCejqZhOf3uOI6VGNMzOY8Dg	Programa SC no Ar
UCuuKLWNMbOTV55j3Ujk18Zw	Educação Financeira - Cléber Miranda
UCRdhKdx8sCyx6KTwGmMb78g	assembleiarr
UCRfPAk1AyQXr0VHVHFtaaag	Atenção Vascaínos!
UCybVje4N7x7xY7Ia1OoxQAw	QUESTIONE-SE
UCPYIYR0J8ppEJVtR1weLnBw	TV GGN
UCUn9CBocrtIw6vNPYPGQ_5w	Curso Online Gratuito
UClkNOcpdzzVTEW-SY10-DrA	Alberto Dell Isola
UCVrx8gt9oAHPbOjA-EjFblw	MOV Show
UCRoiyPUpRJxPkVZYY1fHE1Q	Maestro Bogs
UCFyLC5lgheGX-aNl9GH1uqQ	Progressista
UCRqfUpoyxKlDFZH3-PmehFg	Lívia Zaruty
UCHSFvNDPk5aN3g7lQeipX8Q	Comuna Killers
UCuVh3kbkOfmbiTgREBVvvQA	RÁDIO RN
UCANAywKcS6cJrbl-HiHPOWQ	Lula Livre - Por Nossa Democracia
UCwh8NjwpQmD3PYYNFZg_tyg	Canal Edson Silva História
UCZ9d2hCxMtceleJez4pJMNA	Portal Ternura
UCLpvqh2xTNg7Ewn2HyiMjxQ	Simples Assim
UCdd1PhFKkX96UUr8KmK1DhA	Record TV Paulista
UCUFDVVI3J0ZXtSmF9yL50xg	Mundo de Mariana
UCtHcnXKvUqXSLQ_B1U9zpBQ	Vício Feminino
UCKPIuWx4Eo-WXTMJfHV8zeA	Músicas Clássicas
UCu4XcDBdnZkV6-5z2f16M0g	Real Stories
UC1pEecEFODR1WZtH5w0ZTpw	Attitude
UChDKyKQ59fYz3JO2fl0Z6sg	TODAY
UCKfjBrg8BNO-FgRRnAw3D1g	See And Do Kids
UC8KpMaUwtS1nEkyCAzmojHQ	Anny e Eu Family
UCz2SAmBW1T1mJJGJefylanA	Gabriel de Carvalho
UC8fQzKHIhSoZeSq3bwQx4mw	Mayo Clinic
UCqbgV7oxe7H6t4_xiDnXfIw	Paulina Naslonski
UCE3LimIhZcbjJJ7g8KA3PVg	Jacson Marçal
UCbah7H3RLT4yWwkTd3gsCFQ	Giovanna Maira
UC8Uj2P4_Zya4x4Oghx3afRg	InstitutoVerea
UCCh7IUDKaRNmmbsDheYiLrQ	Alex Sousa
UCkde6MznASMX94hQA-81oWQ	Primeiro Impacto PR
UCIeG8B36iRu6S7EZh8EFyyA	ITV BRASIL 50.1
UCsK-uQfZEgyRL9eCHUdYQKQ	Gamalolftbr
UCAQrR3MfrinvEviHRt5qzJA	VaxXed StoriesChannel #VaxXed #VaxXedStories
UCPbN2D1kYYYMSLr1A6y-yMA	Luiz Jorge Moreira Neto
UCeBR3fhWb-Jyt8i7Hy6_mjA	assembleiasc
UCKoXJUb5JUVyejefUckrOqA	Revista ÉPOCA
UCh3wFqG58kJMTT_2jYBPN_w	EpidemioChannel Br
UC-F65qHnOSZMunINek4nmvw	REC Produções
UC81lG61YXvesfMeKPmn63Tg	TV CIDADE GUARULHOS
UCqcgQALJgSopINSo4ojtUBw	CanalFIPMoc
UCOqJ7A31bYTQ631pOyHQbSw	Sou 60
UCz8po9AOG6nAZthb5wkcA5Q	Daiane Nascimento dos Santos
UCdWW_ho2ZGQ9nZwqRNyQsGQ	tvunivali
UCFiFWF2iO_oNhPywupD_4Uw	Lucas Meira
UC6kFZxGgyD2OZGz8ubNBqhQ	GRUPO DTTV
UCqTxFR0G0ulWso4ZP8z3IJA	Balanço Geral MG
UCehjkgm2t2aXko3WbvcUS1w	Jornalismo TV Campos de Minas
UCz4CXC8Kx8adj1XxaDgR6yg	Canal Minas
UCKQfZvJCDqfBfO2MHakFTdg	elisnalva nogueira de araujo
UCubxEhRi56_V4_eTzzcFwkA	REDE BRASIL OFICIAL
UCw4ORVGi_3GyytS3R-mWPJw	TV Costa Norte Parnaíba-PI
UCLRScGfwGJfP0Gl5cOlb4iQ	ArquivodaPropaganda
UCSNQJKbyfyDIKbov3uh-tkA	Altas Dicas
UCVLMRyUik9KrSdFdfRUiFgg	Bernardo P Küster
UC1Dz3vC3vthE-nZq0ZyCF4g	CONEXÃO 92
UC0pGqjjW6VnPxxThkrYu86g	Meu Diário Positivo!!!
UCPsFqRodwOk0esir1I2qaqQ	Kuadro Oficial
UC5BKM57hcPBdRuH6bbTkYJw	academiadeciencia
UCXGDt3qci5cSIOAeylkCyug	mK
UCojMGwjEcjMzwKzscrcfQog	Abri - Associação Brasileira de Imunodeficiência
UCHvpySztDuMSugbQFkc-2EA	barraprefeitura
UCFHiszunJVb2r1OPCk3wn1A	TV Candidés
UCqQhCrYl2nXCmLGZ83zZ6yw	TV Câmara Ribeirão Preto
UCVqsCVR4IBc6OHt4yrNEsIw	paulotmaluf
UCugmDwbLeJMpW4-tH_f2toQ	Karina Diniz
UCWgI8r-ZLzd_iMBXa8u8iMA	tvitapoan
UCG_dvlfCvB4tnv-zCRCyS4g	Carolina Guimarães
UCgyeJxD05YnoDquRMNBfBqw	PBS
UC6ZFN9Tx6xh-skXCuRHCDpQ	PBS NewsHour
UCh4syoTtvmYlDMeMnwS5dmA	80s Comics
UCmn8oX1V_E14jsR4KXIbeSQ	Mindalia Televisión
UCd4NL_O554LRhmz4utcGYBg	Muita calma nessa Obra
UCKf_IwDvP5LrJbktpfwtFmA	Camila Vasconcelos
UCd239n4B2lCnSZ9SwbulOAQ	Marcela Carvalho
UCOeb7hXfWgeCLEgM-7fmwhQ	Villa Music
UCjIPRjJZtGhzWD2LrEKOHMA	Matemática Rio com Prof. Rafael Procopio
UClFN0Swh7dHb7Zs2bfZQ0qA	Giovanna Ruiz Oficial
UCy14ALftdLPFvTgZ8HoW3JA	Poli Prévias
UCObLld43EhuoGxJZCadLKpQ	MEDICINA QUANTICA DR DAVI RODRIGUES
UC7xks0e9MwoZbisBIZfgOww	Medicina Uniube 22
UCYXz7QXZs69ptmSd4NUsEiw	OBSERVE TUDO
UCCHCjAcioXqaNpUjg3Mi-pQ	CANAL OVERMUNDO
UCEEdi5XBbidJ5fThh-RKdnQ	Registered Nurses Association of Ontario
UCbv13Du4YO6aX5y9kgYwnXA	yitzhak07
UCzzQnR2e5VIgziK3SiJ6uIg	Watchman Reports
UCqida351Ab3xKJgIbwWtjeQ	Manpreet Saini
UC-aa1wREP4i9XRA5_rqed0A	conde loppeux
UCSTlOTcyUmzvhQi6F8lFi5w	Atila Iamarino
UC8kDe2c78xdmZ2YwPy9h-4A	Fatos Surpreendentes
UCedt33latJW7StRfdF4-1FQ	BOA VONTADE
UC6UHPM2GGZxn2L8-EkJCR7Q	Iva Maria
UCU_s1c4toYYAwMvs2U891hA	Além da Rua Atelier por Veronica Kraemer
UCDmPh4In2CrcuFI-e-hD9nA	Estudar Mais Biologia com Prof. Jonatas Fontinele
UCQpKsyAtBqsFb-TPdQl4VYg	Miramar
UCUO4ZXcESh_acDkRpYUc2gw	GOVERNO DE RORAIMA
UCOTX5HwSR_EWuOY0OMDiAig	Sr. & Sra. Montino
UCzNDWqT0AuqQx188JGV5Taw	Paulo Almeida
UCjMVd85CR4OGZj-kNDcQUaw	Clínica de Homeopatia e Naturopatia São Paulo - SEDE
UCIy00Leb2ZETBw9_U0Yg7fg	Rafael M
UC62VmJ_dnZHvSboIRn9Zc9Q	Santiago de la Rosa
UC2vkZ6oKds0moDBEErABUXg	dom310374
UC62tBsh6awMUD5cyBrjvr8Q	TV ALEGO
UCQsJ3UMMUwo_xCW4z5ba_EA	Hospital e Maternidade Santa Joana
UCkYT8YPzCP0bGJkO6RBeRuA	Carlos Iafelice Junior
UCmvavXl7cZAx-qXoDrmEqvw	TV Chris Flores
UCGD5wBPI0T6J1IiJqcHnIMQ	Otorrino Experts
UCbJcCYnxgf4RYA7gO0hdYjQ	Saúde com Ozônio
UCyF-Ubm2ALNTtSiYdG-Ezqg	Victor Sorrentino
UCRLKi_9gQNthwlKi70qi54g	Dr. Alain Dutra
UCIR_frYnXbvJnkSycoqM62g	Dr. Vitor Azzini
UCVxo-mC-IbvtfWgFld84kpg	DJNenoMIX Brasil
UCHGEEhJYJMgWRw7UPYlqxmQ	Saúde Curiosa
UCYoxYA3waaqzJhO_exqCQnw	Lívia Sturnik
UCiB9xI-KYC-CzQkWAnRFPRw	verdade dos fatos
UC5GmNYE1nCfITp9xpyBY7ng	Apliquim Brasil Recicle
UCptYdjTFCDVdkU5nbLmylcQ	Degivaldo Bezerra
UCqikGdV6Uh1YW800PkmcmpA	MEDPRIMUS
UCLr31O2rNob_pzh1UnPcNOg	Ana Paula Palagar
UCcf_-DBdNgyZoK4OYGbgmfg	Jéssica Beatriz Costa
UCv_d2jfwfd1qj3VuF_jOAEw	PIN Progresso Infantil
UCf-5A0NhBAc951Fnpg8fJcg	Jujuba Autismo
UCdWq6NIL_jKyLEBNBT_w8vw	Zorg·nu
UCcw1Aw5GCxc8dIkssjKvRBg	Como nascem os pais
UCfoPDkUuIVd1DZrYA1b8UYg	Thamara Rodrigues
UCUeO_uE5H5cgkzd7ucLrvkg	A tu Salud con María Laura García
UCPSF_i4TthY5-7XMnLjh2jQ	NeurologiaePsiquiatria TV
UCD8dqcY0XiLBA1Z4NalNqdw	AGRO NORTE
UCYq0FWUvxm5mQAu33kIoqDw	Mente Autism
UCEVmIVhHDx5ZFnlsbllWMmA	Recanto da Prece
UCU88bRvLmOB-qkf27xpwZ0Q	Dra. Nazareth Ribeiro
UCfUkLCazuGSyGp5lopQdytA	Dr.José Netto - Otorrino
UCBRc4S-bD40HD9kv2XLW7yg	Thamara Pricila Olioveira
UCNCrg8cSjAEUtCXjAQuLW-w	Meu mundo Autista
UCs6LTBGhB-5BDlTPPxfCrAw	Clínica Espaço Aprender
UCZrvYw-aW36ztpZcCZC-eoQ	Saúde da Mente
UCzGmaC039FOPY8oHRAEqGvw	Neurocyt
UCVEZoDeWALDn74igWEB_f2Q	Walker TV
UCeSN0y5uE3Q_aAFdBoPaueQ	Chat Reality
UCiEkAcqLrULGkv2TcnsvL_A	verdade oculta
UCZ18OYPiEd-m_IyltxdITxQ	Irene Passos Santos
UCV9pdu7XH9kLCaVNuDL-n7w	Da Loucura à Ciência
UC45Ow-5ek1MMkm970aOpoig	BrandedSharkBait
UC7TPDB18dXnlv0C4zzYsS3Q	HealthRanger7
edgedef>node1 VARCHAR	node2 VARCHAR	weight INT	directed BOOLEAN
UCHyeOQ0-Td0Dv3xfI0dwu3g	UCHyeOQ0-Td0Dv3xfI0dwu3g	67	true
UCHyeOQ0-Td0Dv3xfI0dwu3g	UC9zqTTVeClpqMQ5CLuJdWtw	3	true
UCHyeOQ0-Td0Dv3xfI0dwu3g	UCuAaB8lLRmoZzOrc_d_Ka0A	4	true
UCHyeOQ0-Td0Dv3xfI0dwu3g	UCyoGb3SMlTlB8CLGVH4c8Rw	1	true
UCHyeOQ0-Td0Dv3xfI0dwu3g	UC3PLVO-mt6ZQLiySKdJedCA	1	true
UCHyeOQ0-Td0Dv3xfI0dwu3g	UCcoPc-BqFPkVkkwyS35J-ng	1	true
UCHyeOQ0-Td0Dv3xfI0dwu3g	UCUhobUO_K4qY2z1OJ7tw_rA	1	true
UCHyeOQ0-Td0Dv3xfI0dwu3g	UCxucJ9P3mLMneYypLZYn2uw	1	true
UCHyeOQ0-Td0Dv3xfI0dwu3g	UC12zKGLhMhDeDidoctM6BrA	3	true
UCHyeOQ0-Td0Dv3xfI0dwu3g	UCH2VZQBLFTOp6I_qgnBJCuQ	1	true
UCHyeOQ0-Td0Dv3xfI0dwu3g	UCl1eRuftjRdetdWkrbeDBGg	1	true
UCHyeOQ0-Td0Dv3xfI0dwu3g	UCk0U1Js-um2lRjSF3VoS_3A	1	true
UCHyeOQ0-Td0Dv3xfI0dwu3g	UCXj2oSzwg6G0iBjKg33joMQ	1	true
UCHyeOQ0-Td0Dv3xfI0dwu3g	UCN-opsqqDunWO6h5uCp9Y4g	1	true
UCHyeOQ0-Td0Dv3xfI0dwu3g	UCmpHPgeCBgvk_fDXZQKsnAA	1	true
UCHyeOQ0-Td0Dv3xfI0dwu3g	UCG-eghyORxNrzSG8FkAWKyw	1	true
UCHyeOQ0-Td0Dv3xfI0dwu3g	UC81fUuO3oGR-ju7tEAuyNPA	1	true
UCHyeOQ0-Td0Dv3xfI0dwu3g	UCGfBE94turq_hyKMxB-Dfrg	1	true
UCHyeOQ0-Td0Dv3xfI0dwu3g	UCe1XNXkGImWSq5n4wkzNjBw	3	true
UCHyeOQ0-Td0Dv3xfI0dwu3g	UCPR3gVNYBzi-02_O4noC1Zg	1	true
UCHyeOQ0-Td0Dv3xfI0dwu3g	UCGILPX9AE6hZpqp1FjFn6pw	1	true
UCHyeOQ0-Td0Dv3xfI0dwu3g	UCMMJm4lYxEh7GM4loYh6-SQ	1	true
UCHyeOQ0-Td0Dv3xfI0dwu3g	UClN6OLbLp1YjTSwDOkEM2dA	1	true
UCHyeOQ0-Td0Dv3xfI0dwu3g	UCF_C2UbEzxoCn1mu6AltgvA	1	true
UCHyeOQ0-Td0Dv3xfI0dwu3g	UC0LDNBjI8prPXedEj3QosOQ	1	true
UCHyeOQ0-Td0Dv3xfI0dwu3g	UCdKJlY5eAoSumIlcOcYxIGg	1	true
UCHyeOQ0-Td0Dv3xfI0dwu3g	UCz1xVDltULzUhZCJ1TkvnTQ	1	true
UCHyeOQ0-Td0Dv3xfI0dwu3g	UC3Ooj_iDWELBumIEDejyNHQ	1	true
UCHyeOQ0-Td0Dv3xfI0dwu3g	UCJJMzrEvAsnrfx8ur7DisQw	1	true
UCHyeOQ0-Td0Dv3xfI0dwu3g	UCP391YRAjSOdM_bwievgaZA	4	true
UCHyeOQ0-Td0Dv3xfI0dwu3g	UCF8Uaj9cnSkL-63NSPnBVCQ	1	true
UCHyeOQ0-Td0Dv3xfI0dwu3g	UCqZN-NqgP7bhbctbyThSVUA	1	true
UCHyeOQ0-Td0Dv3xfI0dwu3g	UC9fxSdFjcz5QWDEhYCk_k1w	1	true
UCHyeOQ0-Td0Dv3xfI0dwu3g	UCstv_dyLeuAbDB8ISTfkFbQ	1	true
UCHyeOQ0-Td0Dv3xfI0dwu3g	UCgbbjw8zPkrmmL_XU1SgJBg	1	true
UCHyeOQ0-Td0Dv3xfI0dwu3g	UCj7tzC9HCCUnkROYJocRzYA	1	true
UCHyeOQ0-Td0Dv3xfI0dwu3g	UCWq1xltHB2fDe6YkYoOrryg	2	true
UCHyeOQ0-Td0Dv3xfI0dwu3g	UCuqsl-IppoFW0uNPQfbXAVg	1	true
UCHyeOQ0-Td0Dv3xfI0dwu3g	UChkPByjtZumJrJmtqkiw5Jg	1	true
UCHyeOQ0-Td0Dv3xfI0dwu3g	UCVPdtCCsEsem4hyVwS_GzOQ	2	true
UCHyeOQ0-Td0Dv3xfI0dwu3g	UCmV27tf2iqUZDDtXiShSKUg	1	true
UCHyeOQ0-Td0Dv3xfI0dwu3g	UC4F32QLrpDmmRrozxr9z59g	2	true
UCHyeOQ0-Td0Dv3xfI0dwu3g	UCv3JgOy__M8B3xsa5adWR6g	1	true
UCHyeOQ0-Td0Dv3xfI0dwu3g	UCvLNnnIZdqXYqAS-l8FLJFw	1	true
UCHyeOQ0-Td0Dv3xfI0dwu3g	UCj0_I61NA_sCFI2JW4QdOCQ	1	true
UCHyeOQ0-Td0Dv3xfI0dwu3g	UC3vZWDAhX5356m17Vy1B2GA	1	true
UCuAaB8lLRmoZzOrc_d_Ka0A	UCuAaB8lLRmoZzOrc_d_Ka0A	691	true
UCuAaB8lLRmoZzOrc_d_Ka0A	UCP-Vg2PcmLiWpEdvMI1R35w	3	true
UCuAaB8lLRmoZzOrc_d_Ka0A	UCG-eghyORxNrzSG8FkAWKyw	3	true
UCuAaB8lLRmoZzOrc_d_Ka0A	UCLgti7NuK0RuW9wty-fxPjQ	2	true
UCuAaB8lLRmoZzOrc_d_Ka0A	UC9zqTTVeClpqMQ5CLuJdWtw	15	true
UCuAaB8lLRmoZzOrc_d_Ka0A	UCl1eRuftjRdetdWkrbeDBGg	1	true
UCuAaB8lLRmoZzOrc_d_Ka0A	UCPR3gVNYBzi-02_O4noC1Zg	2	true
UCuAaB8lLRmoZzOrc_d_Ka0A	UCykUsChWx0cy2ZRn3r0s5qQ	4	true
UCuAaB8lLRmoZzOrc_d_Ka0A	UCHyeOQ0-Td0Dv3xfI0dwu3g	3	true
UCuAaB8lLRmoZzOrc_d_Ka0A	UCXj2oSzwg6G0iBjKg33joMQ	2	true
UCuAaB8lLRmoZzOrc_d_Ka0A	UCxt_nr6Xwbq4O2Ur9ZBpgAA	1	true
UCuAaB8lLRmoZzOrc_d_Ka0A	UCFbx6QBTcDI6toOnO-EyajQ	34	true
UCuAaB8lLRmoZzOrc_d_Ka0A	UCE0KRm8m9_ki8MrMYGyjpAw	1	true
UCuAaB8lLRmoZzOrc_d_Ka0A	UCR9EXU15wObpFMDyQmHXeuw	1	true
UCuAaB8lLRmoZzOrc_d_Ka0A	UC7m35AnSXe8aSsBWRCPEQ1g	1	true
UCuAaB8lLRmoZzOrc_d_Ka0A	UCH2VZQBLFTOp6I_qgnBJCuQ	2	true
UCuAaB8lLRmoZzOrc_d_Ka0A	UCHwQqfFkSlJXCgbjA1DJcKw	4	true
UCuAaB8lLRmoZzOrc_d_Ka0A	UC0LDNBjI8prPXedEj3QosOQ	1	true
UCuAaB8lLRmoZzOrc_d_Ka0A	UCGILPX9AE6hZpqp1FjFn6pw	14	true
UCuAaB8lLRmoZzOrc_d_Ka0A	UCGfBE94turq_hyKMxB-Dfrg	1	true
UCuAaB8lLRmoZzOrc_d_Ka0A	UC3Ooj_iDWELBumIEDejyNHQ	3	true
UCuAaB8lLRmoZzOrc_d_Ka0A	UCyjo9Vr-Okmq7OHYyEQHGTQ	1	true
UCuAaB8lLRmoZzOrc_d_Ka0A	UCrSM1UV_KLAdTzgxyxl3POw	1	true
UCuAaB8lLRmoZzOrc_d_Ka0A	UCdKJlY5eAoSumIlcOcYxIGg	1	true
UCuAaB8lLRmoZzOrc_d_Ka0A	UCMMJm4lYxEh7GM4loYh6-SQ	2	true
UCuAaB8lLRmoZzOrc_d_Ka0A	UC4_WOkaSB6TMFad-v0T6qmg	6	true
UCuAaB8lLRmoZzOrc_d_Ka0A	UCPGGSQfN8LREy6dWdk85fpw	8	true
UCuAaB8lLRmoZzOrc_d_Ka0A	UC2mdv67uDPQO35IYkzK_Xzw	6	true
UCuAaB8lLRmoZzOrc_d_Ka0A	UCgbbjw8zPkrmmL_XU1SgJBg	2	true
UCuAaB8lLRmoZzOrc_d_Ka0A	UCXogxn8ApsdqeXyIDvBWOzg	1	true
UCuAaB8lLRmoZzOrc_d_Ka0A	UCBgDfWeylq5S_4yBpgg0rKA	1	true
UCuAaB8lLRmoZzOrc_d_Ka0A	UC5ZXYxeWlROKbL7JziJ0bIQ	2	true
UCuAaB8lLRmoZzOrc_d_Ka0A	UCsCeWWW8sk8zDaPzw6Ll67g	1	true
UCuAaB8lLRmoZzOrc_d_Ka0A	UCnNvQI_yyWPZGI-rqFhR17Q	3	true
UCuAaB8lLRmoZzOrc_d_Ka0A	UC9fxSdFjcz5QWDEhYCk_k1w	2	true
UCuAaB8lLRmoZzOrc_d_Ka0A	UCqZN-NqgP7bhbctbyThSVUA	1	true
UCuAaB8lLRmoZzOrc_d_Ka0A	UCWq1xltHB2fDe6YkYoOrryg	4	true
UCuAaB8lLRmoZzOrc_d_Ka0A	UCquENngBYGYpHYtN0OVYLKQ	1	true
UCuAaB8lLRmoZzOrc_d_Ka0A	UCvsvFTlOWSFU_RBinLDU7Ow	1	true
UCuAaB8lLRmoZzOrc_d_Ka0A	UCrtNrQTDykcrtfYMkggmV5g	3	true
UCuAaB8lLRmoZzOrc_d_Ka0A	UCIksRr4M8kOqxUTyYDSwy4A	1	true
UCuAaB8lLRmoZzOrc_d_Ka0A	UCvLNnnIZdqXYqAS-l8FLJFw	2	true
UCuAaB8lLRmoZzOrc_d_Ka0A	UC1_-z9fMYofIUQWYUPoNyTw	1	true
UCuAaB8lLRmoZzOrc_d_Ka0A	UCIu-GZ6a7B-IMyUs1rD629w	1	true
UCuAaB8lLRmoZzOrc_d_Ka0A	UCsAMQ6_-iRdEWBVh8q-IXmA	1	true
UCuAaB8lLRmoZzOrc_d_Ka0A	UC3vZWDAhX5356m17Vy1B2GA	2	true
UC9zqTTVeClpqMQ5CLuJdWtw	UCthbIFAxbXTTQEC7EcQvP1Q	10	true
UC9zqTTVeClpqMQ5CLuJdWtw	UCLgti7NuK0RuW9wty-fxPjQ	6	true
UC9zqTTVeClpqMQ5CLuJdWtw	UCKHhA5hN2UohhFDfNXB_cvQ	12	true
UC9zqTTVeClpqMQ5CLuJdWtw	UC9zqTTVeClpqMQ5CLuJdWtw	232	true
UC9zqTTVeClpqMQ5CLuJdWtw	UC4zG6UeNUn-HM6UEFFkiESA	5	true
UC9zqTTVeClpqMQ5CLuJdWtw	UCA1nC2t2zfzBOySscmpIzGQ	4	true
UC9zqTTVeClpqMQ5CLuJdWtw	UCXj2oSzwg6G0iBjKg33joMQ	8	true
UC9zqTTVeClpqMQ5CLuJdWtw	UCI2EhvTADDdOex2nBIRsigw	1	true
UC9zqTTVeClpqMQ5CLuJdWtw	UCxucJ9P3mLMneYypLZYn2uw	11	true
UC9zqTTVeClpqMQ5CLuJdWtw	UCH2VZQBLFTOp6I_qgnBJCuQ	4	true
UC9zqTTVeClpqMQ5CLuJdWtw	UCuAaB8lLRmoZzOrc_d_Ka0A	2	true
UC9zqTTVeClpqMQ5CLuJdWtw	UCqZN-NqgP7bhbctbyThSVUA	4	true
UC9zqTTVeClpqMQ5CLuJdWtw	UCWijW6tW0iI5ghsAbWDFtTg	1	true
UC9zqTTVeClpqMQ5CLuJdWtw	UCPR3gVNYBzi-02_O4noC1Zg	6	true
UC9zqTTVeClpqMQ5CLuJdWtw	UCxt_nr6Xwbq4O2Ur9ZBpgAA	3	true
UC9zqTTVeClpqMQ5CLuJdWtw	UCDtVoSwSwQgwhcC89Nlz5Vg	7	true
UC9zqTTVeClpqMQ5CLuJdWtw	UCSruzCoJeEIu3jNSwrCU9HQ	1	true
UC9zqTTVeClpqMQ5CLuJdWtw	UCG-eghyORxNrzSG8FkAWKyw	8	true
UC9zqTTVeClpqMQ5CLuJdWtw	UCW4t6ozY9VDVeN_GHK260BQ	2	true
UC9zqTTVeClpqMQ5CLuJdWtw	UCHyeOQ0-Td0Dv3xfI0dwu3g	2	true
UC9zqTTVeClpqMQ5CLuJdWtw	UCUp-GSUuNxSZ7cxOg7ZnyqA	6	true
UC9zqTTVeClpqMQ5CLuJdWtw	UCIQPHl1WKKTt9KkWyo_JNig	5	true
UC9zqTTVeClpqMQ5CLuJdWtw	UChHd-MU2mOvZHmBQz6zJw_w	3	true
UC9zqTTVeClpqMQ5CLuJdWtw	UCw8ZXVXrAyNTdvzKH6HMhmg	2	true
UC9zqTTVeClpqMQ5CLuJdWtw	UCXdXYG8dUmEv6jhEji_lSHg	1	true
UC9zqTTVeClpqMQ5CLuJdWtw	UCGfBE94turq_hyKMxB-Dfrg	2	true
UC9zqTTVeClpqMQ5CLuJdWtw	UCViYj9umcJZdjKITQrB1D5A	1	true
UC9zqTTVeClpqMQ5CLuJdWtw	UCjzUQX-5DwOTR1q68ydu_bg	1	true
UC9zqTTVeClpqMQ5CLuJdWtw	UC0LDNBjI8prPXedEj3QosOQ	5	true
UC9zqTTVeClpqMQ5CLuJdWtw	UCMMJm4lYxEh7GM4loYh6-SQ	1	true
UC9zqTTVeClpqMQ5CLuJdWtw	UCVFbXI6Gu8U2f9Gjtxw4A-Q	11	true
UC9zqTTVeClpqMQ5CLuJdWtw	UCsW2F43izuIFU58yq_anyDA	1	true
UC9zqTTVeClpqMQ5CLuJdWtw	UC4F32QLrpDmmRrozxr9z59g	16	true
UC9zqTTVeClpqMQ5CLuJdWtw	UCquENngBYGYpHYtN0OVYLKQ	1	true
UC9zqTTVeClpqMQ5CLuJdWtw	UCdKJlY5eAoSumIlcOcYxIGg	1	true
UC9zqTTVeClpqMQ5CLuJdWtw	UCq8ChnGCYMVCzDgGMK9e91A	9	true
UC9zqTTVeClpqMQ5CLuJdWtw	UCkke64Kird1ZcZsPJEo_hYg	1	true
UC9zqTTVeClpqMQ5CLuJdWtw	UC3Ooj_iDWELBumIEDejyNHQ	1	true
UC9zqTTVeClpqMQ5CLuJdWtw	UCgbbjw8zPkrmmL_XU1SgJBg	4	true
UC9zqTTVeClpqMQ5CLuJdWtw	UCZ4pDPv5kdO_2Da5brOlOZQ	1	true
UC9zqTTVeClpqMQ5CLuJdWtw	UCbM9lRa0XE5Nsgqo8rsndvg	2	true
UC9zqTTVeClpqMQ5CLuJdWtw	UCWX70TFNwDsBLYlRzOe_-zw	1	true
UC9zqTTVeClpqMQ5CLuJdWtw	UCwQhAc44SfDvhdCQiHluBVQ	5	true
UC9zqTTVeClpqMQ5CLuJdWtw	UCyuDCBA1ig-x1YeAQBX2b4g	1	true
UC9zqTTVeClpqMQ5CLuJdWtw	UCvLNnnIZdqXYqAS-l8FLJFw	1	true
UC9zqTTVeClpqMQ5CLuJdWtw	UC12zKGLhMhDeDidoctM6BrA	16	true
UCN-opsqqDunWO6h5uCp9Y4g	UCDtVoSwSwQgwhcC89Nlz5Vg	6	true
UCN-opsqqDunWO6h5uCp9Y4g	UCN-opsqqDunWO6h5uCp9Y4g	67	true
UCN-opsqqDunWO6h5uCp9Y4g	UCP-Vg2PcmLiWpEdvMI1R35w	3	true
UCN-opsqqDunWO6h5uCp9Y4g	UCJMH8GNRXMjr2uGci28v9_g	2	true
UCN-opsqqDunWO6h5uCp9Y4g	UCy7oVBYY0FGXeeJpy6ITXxQ	2	true
UCN-opsqqDunWO6h5uCp9Y4g	UCS7R8itSUunTrA19WrZMWxw	1	true
UCN-opsqqDunWO6h5uCp9Y4g	UCoa-D_VfMkFrCYodrOC9-mA	4	true
UCN-opsqqDunWO6h5uCp9Y4g	UCSv9d0kQegylHWpP83jWSQg	3	true
UCN-opsqqDunWO6h5uCp9Y4g	UCIQPHl1WKKTt9KkWyo_JNig	2	true
UCN-opsqqDunWO6h5uCp9Y4g	UC4zG6UeNUn-HM6UEFFkiESA	4	true
UCN-opsqqDunWO6h5uCp9Y4g	UCORRcj9wv5DEYCEg2LhBcLQ	1	true
UCN-opsqqDunWO6h5uCp9Y4g	UCR2IONXExRWEGxREw7lXHCQ	2	true
UCN-opsqqDunWO6h5uCp9Y4g	UC2mmP8ysfyko40KSn90x6Og	1	true
UCN-opsqqDunWO6h5uCp9Y4g	UC8CYH-5VBNcMj9wta4W8cPw	1	true
UCN-opsqqDunWO6h5uCp9Y4g	UCDes47D0_xrzOm_r7b9RQAQ	1	true
UCN-opsqqDunWO6h5uCp9Y4g	UCD9kk0EUEtflrRl6TV0lDyA	1	true
UCN-opsqqDunWO6h5uCp9Y4g	UCXdXYG8dUmEv6jhEji_lSHg	1	true
UCN-opsqqDunWO6h5uCp9Y4g	UCNl_i-ggJbZNyOLlhE7yyhw	7	true
UCN-opsqqDunWO6h5uCp9Y4g	UCZmc8QllMtE-fr51p1niyjw	1	true
UCN-opsqqDunWO6h5uCp9Y4g	UC12zKGLhMhDeDidoctM6BrA	22	true
UCN-opsqqDunWO6h5uCp9Y4g	UCk9mgpQVdJ5oKQWkM1UPBaQ	3	true
UCN-opsqqDunWO6h5uCp9Y4g	UCOcG-EPdn2gsWVuMpF1TRVA	1	true
UCN-opsqqDunWO6h5uCp9Y4g	UC9zqTTVeClpqMQ5CLuJdWtw	18	true
UCN-opsqqDunWO6h5uCp9Y4g	UCcoPc-BqFPkVkkwyS35J-ng	3	true
UCN-opsqqDunWO6h5uCp9Y4g	UCyvhqROV3luJvtt2dLTFhAA	1	true
UCN-opsqqDunWO6h5uCp9Y4g	UCH2VZQBLFTOp6I_qgnBJCuQ	2	true
UCN-opsqqDunWO6h5uCp9Y4g	UCT0ECF7TihWahDqpU2i9tQA	1	true
UCN-opsqqDunWO6h5uCp9Y4g	UCq8ChnGCYMVCzDgGMK9e91A	5	true
UCN-opsqqDunWO6h5uCp9Y4g	UClu474HMt895mVxZdlIHXEA	2	true
UCN-opsqqDunWO6h5uCp9Y4g	UCV6Ue4o5UIeKQ3IEkjnXRlg	1	true
UCN-opsqqDunWO6h5uCp9Y4g	UCMYTIyqS1-7wT-3pBB8bR5A	6	true
UCN-opsqqDunWO6h5uCp9Y4g	UCnwxA62CqAnW_z0n4WLbp6A	1	true
UCN-opsqqDunWO6h5uCp9Y4g	UCxucJ9P3mLMneYypLZYn2uw	10	true
UCN-opsqqDunWO6h5uCp9Y4g	UCQdOZmbeT9UoQy8G3zeNE-g	3	true
UCN-opsqqDunWO6h5uCp9Y4g	UC0nblCDJx75fBCDDqTCKHaQ	1	true
UCN-opsqqDunWO6h5uCp9Y4g	UC8IbAhPglJ1OeC44A_Gtmqg	3	true
UCN-opsqqDunWO6h5uCp9Y4g	UCqZN-NqgP7bhbctbyThSVUA	4	true
UCN-opsqqDunWO6h5uCp9Y4g	UC0LDNBjI8prPXedEj3QosOQ	2	true
UCN-opsqqDunWO6h5uCp9Y4g	UCi2zMfox-UpFGAFfsMXqYfQ	2	true
UCN-opsqqDunWO6h5uCp9Y4g	UCOQ_KwPhg3IZbigiK7NCnfQ	3	true
UCN-opsqqDunWO6h5uCp9Y4g	UCP391YRAjSOdM_bwievgaZA	17	true
UCN-opsqqDunWO6h5uCp9Y4g	UCVrKQMmA2ew9LFzeIDaOFgw	15	true
UCN-opsqqDunWO6h5uCp9Y4g	UC4JEf2ejgucNsmsFiEy0mSw	1	true
UCN-opsqqDunWO6h5uCp9Y4g	UCKtJs_zI1yzswHDWqkqHtWw	2	true
UCN-opsqqDunWO6h5uCp9Y4g	UCyjo9Vr-Okmq7OHYyEQHGTQ	1	true
UCN-opsqqDunWO6h5uCp9Y4g	UCGfBE94turq_hyKMxB-Dfrg	5	true
UCN-opsqqDunWO6h5uCp9Y4g	UChHd-MU2mOvZHmBQz6zJw_w	1	true
UCN-opsqqDunWO6h5uCp9Y4g	UCDpNPd9fc0fNudJ2_CHK4Xg	1	true
UCN-opsqqDunWO6h5uCp9Y4g	UCsNFdDp3O_lhT_QNkMdk4XA	1	true
UCN-opsqqDunWO6h5uCp9Y4g	UCuiLR4p6wQ3xLEm15pEn1Xw	4	true
UCN-opsqqDunWO6h5uCp9Y4g	UCyE4KeQg54Bx34LxQB22xkw	1	true
UCN-opsqqDunWO6h5uCp9Y4g	UCOdXmOv9s5uQJPfe7w_4Dtw	1	true
UCN-opsqqDunWO6h5uCp9Y4g	UCgbbjw8zPkrmmL_XU1SgJBg	2	true
UCN-opsqqDunWO6h5uCp9Y4g	UCOS_wL35NuMn8qLASOQqfUQ	2	true
UCN-opsqqDunWO6h5uCp9Y4g	UCnGjlUb4uF2rZWOpd-0x12g	1	true
UCN-opsqqDunWO6h5uCp9Y4g	UCRlrE2ZyiPLyS61pgJCIoUA	1	true
UCN-opsqqDunWO6h5uCp9Y4g	UCQTOPLEFah0hBCB7dmaoPtw	1	true
UCSv9d0kQegylHWpP83jWSQg	UCSv9d0kQegylHWpP83jWSQg	342	true
UCSv9d0kQegylHWpP83jWSQg	UCMYTIyqS1-7wT-3pBB8bR5A	10	true
UCSv9d0kQegylHWpP83jWSQg	UCL41BsrnhsSSXG4zYwqC95g	2	true
UCSv9d0kQegylHWpP83jWSQg	UCORRcj9wv5DEYCEg2LhBcLQ	1	true
UCSv9d0kQegylHWpP83jWSQg	UCjaWLFTNqLkq3ZY2BJ4NYRg	19	true
UCSv9d0kQegylHWpP83jWSQg	UCN-opsqqDunWO6h5uCp9Y4g	5	true
UCSv9d0kQegylHWpP83jWSQg	UC12zKGLhMhDeDidoctM6BrA	25	true
UCSv9d0kQegylHWpP83jWSQg	UCqZN-NqgP7bhbctbyThSVUA	4	true
UCSv9d0kQegylHWpP83jWSQg	UCoa-D_VfMkFrCYodrOC9-mA	5	true
UCSv9d0kQegylHWpP83jWSQg	UC9zqTTVeClpqMQ5CLuJdWtw	14	true
UCSv9d0kQegylHWpP83jWSQg	UCDtVoSwSwQgwhcC89Nlz5Vg	8	true
UCSv9d0kQegylHWpP83jWSQg	UClu474HMt895mVxZdlIHXEA	2	true
UCSv9d0kQegylHWpP83jWSQg	UCvJ1AGdJwRhGWM5n6D-SX9w	1	true
UCSv9d0kQegylHWpP83jWSQg	UCz54U1Ts7JR7ZtSiClcVOOw	1	true
UCSv9d0kQegylHWpP83jWSQg	UChHd-MU2mOvZHmBQz6zJw_w	4	true
UCSv9d0kQegylHWpP83jWSQg	UCYLwyFQWSQkdOuVnMUEYu7g	3	true
UCSv9d0kQegylHWpP83jWSQg	UCNl_i-ggJbZNyOLlhE7yyhw	4	true
UCSv9d0kQegylHWpP83jWSQg	UCcnuou4Sjm-qF87yzWve1ug	2	true
UCSv9d0kQegylHWpP83jWSQg	UCMMJm4lYxEh7GM4loYh6-SQ	1	true
UCSv9d0kQegylHWpP83jWSQg	UCGfBE94turq_hyKMxB-Dfrg	6	true
UCSv9d0kQegylHWpP83jWSQg	UCP391YRAjSOdM_bwievgaZA	18	true
UCSv9d0kQegylHWpP83jWSQg	UCABvMeFftxjprbpcl3bNimw	1	true
UCSv9d0kQegylHWpP83jWSQg	UC7XHNGVNCUs_V5B_xWAMQUQ	1	true
UCSv9d0kQegylHWpP83jWSQg	UCCIQoWSB2N80fU7x5ga3Biw	2	true
UCSv9d0kQegylHWpP83jWSQg	UC3Ooj_iDWELBumIEDejyNHQ	1	true
UCSv9d0kQegylHWpP83jWSQg	UCOwuzVSWrrAdRIviGN7-T5g	2	true
UCSv9d0kQegylHWpP83jWSQg	UCq7xmFdlNNXgCRIq7G-5RxQ	1	true
UCSv9d0kQegylHWpP83jWSQg	UCTGVdd_qB7Rz4X4oAKZ0kyg	2	true
UCSv9d0kQegylHWpP83jWSQg	UCWq1xltHB2fDe6YkYoOrryg	1	true
UCSv9d0kQegylHWpP83jWSQg	UCvLNnnIZdqXYqAS-l8FLJFw	1	true
UCSv9d0kQegylHWpP83jWSQg	UC88EfXGkc_98Q8XoZ8k9j7g	1	true
UCSv9d0kQegylHWpP83jWSQg	UC6ZSx1wPLaXyZ0yrbWikeNQ	1	true
UCSv9d0kQegylHWpP83jWSQg	UC01Os2Eeg6MCABfv384yKyQ	1	true
UCSv9d0kQegylHWpP83jWSQg	UC9gmqJKNBOyCl2KLdJIv0mQ	1	true
UCSv9d0kQegylHWpP83jWSQg	UC8IbAhPglJ1OeC44A_Gtmqg	4	true
UCSv9d0kQegylHWpP83jWSQg	UChK2Fhha3BMBVSu8yqCWYZw	1	true
UCSv9d0kQegylHWpP83jWSQg	UCNMwzMh0MW_J_nK9kMS4ldg	1	true
UCSv9d0kQegylHWpP83jWSQg	UCKtJs_zI1yzswHDWqkqHtWw	2	true
UCSv9d0kQegylHWpP83jWSQg	UCbrwFkBkzcT9UmskS7g8vdA	3	true
UCSv9d0kQegylHWpP83jWSQg	UCUtDAMp91VCfHTZ9_ypKRPA	3	true
UCSv9d0kQegylHWpP83jWSQg	UCrJ_9o1YxOZiSqTCgKXApEQ	2	true
UCSv9d0kQegylHWpP83jWSQg	UCl4swlkSKDinuw5w5S77m8A	1	true
UCMMJm4lYxEh7GM4loYh6-SQ	UCMMJm4lYxEh7GM4loYh6-SQ	22	true
UCMMJm4lYxEh7GM4loYh6-SQ	UCYLwyFQWSQkdOuVnMUEYu7g	1	true
UCMMJm4lYxEh7GM4loYh6-SQ	UCMYTIyqS1-7wT-3pBB8bR5A	2	true
UCMMJm4lYxEh7GM4loYh6-SQ	UCORRcj9wv5DEYCEg2LhBcLQ	1	true
UCMMJm4lYxEh7GM4loYh6-SQ	UC4t2mdI8uAiJDJSRjiWJT1Q	1	true
UCMMJm4lYxEh7GM4loYh6-SQ	UCoa-D_VfMkFrCYodrOC9-mA	1	true
UCMMJm4lYxEh7GM4loYh6-SQ	UC12zKGLhMhDeDidoctM6BrA	3	true
UCMMJm4lYxEh7GM4loYh6-SQ	UCuAaB8lLRmoZzOrc_d_Ka0A	2	true
UCMMJm4lYxEh7GM4loYh6-SQ	UCPR3gVNYBzi-02_O4noC1Zg	1	true
UCMMJm4lYxEh7GM4loYh6-SQ	UC9zqTTVeClpqMQ5CLuJdWtw	1	true
UCMMJm4lYxEh7GM4loYh6-SQ	UCthbIFAxbXTTQEC7EcQvP1Q	1	true
UCMMJm4lYxEh7GM4loYh6-SQ	UCHyeOQ0-Td0Dv3xfI0dwu3g	1	true
UCMMJm4lYxEh7GM4loYh6-SQ	UCRf1JoNRdPLFWXemwIrov6g	1	true
UCMMJm4lYxEh7GM4loYh6-SQ	UChHd-MU2mOvZHmBQz6zJw_w	1	true
UCMMJm4lYxEh7GM4loYh6-SQ	UCGfBE94turq_hyKMxB-Dfrg	1	true
UCMMJm4lYxEh7GM4loYh6-SQ	UC1RnMyP-HfZCyMLX0TmyMTg	1	true
UCMMJm4lYxEh7GM4loYh6-SQ	UCy7oVBYY0FGXeeJpy6ITXxQ	1	true
UCMMJm4lYxEh7GM4loYh6-SQ	UCVqS-HRwe2vq_Jjgu4fg-UA	1	true
UCMMJm4lYxEh7GM4loYh6-SQ	UCXQatvGsVCzrm35PnxoHJsA	1	true
UCMMJm4lYxEh7GM4loYh6-SQ	UCZmc8QllMtE-fr51p1niyjw	1	true
UCMMJm4lYxEh7GM4loYh6-SQ	UCl01kak5i66hCdS_bCxkkgA	1	true
UCMMJm4lYxEh7GM4loYh6-SQ	UCh6e1_rbI_pUASvnLV_nyxQ	1	true
UCMMJm4lYxEh7GM4loYh6-SQ	UCH2VZQBLFTOp6I_qgnBJCuQ	1	true
UCMMJm4lYxEh7GM4loYh6-SQ	UC3Ooj_iDWELBumIEDejyNHQ	1	true
UCMMJm4lYxEh7GM4loYh6-SQ	UCI2EhvTADDdOex2nBIRsigw	1	true
UCMMJm4lYxEh7GM4loYh6-SQ	UCe1XNXkGImWSq5n4wkzNjBw	2	true
UCMMJm4lYxEh7GM4loYh6-SQ	UCQbKXPyFsK-j0haJE0PGvhA	1	true
UCMMJm4lYxEh7GM4loYh6-SQ	UC5lg8zKcnJ1rnxR6lPgD1ug	1	true
UCMMJm4lYxEh7GM4loYh6-SQ	UCqZN-NqgP7bhbctbyThSVUA	1	true
UCMMJm4lYxEh7GM4loYh6-SQ	UCCIQoWSB2N80fU7x5ga3Biw	1	true
UCMMJm4lYxEh7GM4loYh6-SQ	UCa1o8yRux22rDwRbEjokSPg	1	true
UCMMJm4lYxEh7GM4loYh6-SQ	UC0LDNBjI8prPXedEj3QosOQ	1	true
UCMMJm4lYxEh7GM4loYh6-SQ	UCJIKKHplhnzcDmpztqUO7nA	1	true
UCMMJm4lYxEh7GM4loYh6-SQ	UCF_C2UbEzxoCn1mu6AltgvA	1	true
UCMMJm4lYxEh7GM4loYh6-SQ	UCWq1xltHB2fDe6YkYoOrryg	1	true
UCMMJm4lYxEh7GM4loYh6-SQ	UC9fxSdFjcz5QWDEhYCk_k1w	1	true
UCMMJm4lYxEh7GM4loYh6-SQ	UCsYo9r-JIEkhoRoc9G5gdpQ	1	true
UCMMJm4lYxEh7GM4loYh6-SQ	UCgbbjw8zPkrmmL_XU1SgJBg	1	true
UCMMJm4lYxEh7GM4loYh6-SQ	UC5ZXYxeWlROKbL7JziJ0bIQ	1	true
UCMMJm4lYxEh7GM4loYh6-SQ	UCyuDCBA1ig-x1YeAQBX2b4g	1	true
UCMMJm4lYxEh7GM4loYh6-SQ	UCi09l6tPPrtcfL9EOXncU5Q	1	true
UCMMJm4lYxEh7GM4loYh6-SQ	UCWX70TFNwDsBLYlRzOe_-zw	1	true
UCMMJm4lYxEh7GM4loYh6-SQ	UCnNvQI_yyWPZGI-rqFhR17Q	1	true
UCMMJm4lYxEh7GM4loYh6-SQ	UC5hGM-gAk5I8zmn8xUKuNkw	1	true
UCMMJm4lYxEh7GM4loYh6-SQ	UC49x20RykBnDY1RFHkdDnsw	1	true
UCMMJm4lYxEh7GM4loYh6-SQ	UC2mdv67uDPQO35IYkzK_Xzw	1	true
UCMMJm4lYxEh7GM4loYh6-SQ	UCxbqmMsXory_zC-kNqKHUgw	1	true
UCMMJm4lYxEh7GM4loYh6-SQ	UCuqsl-IppoFW0uNPQfbXAVg	1	true
UCMMJm4lYxEh7GM4loYh6-SQ	UCmUmPLUgKmHvKvYNnrXMZWw	1	true
UCMMJm4lYxEh7GM4loYh6-SQ	UCS8UJsFfBriLvKUvoSPVtmA	1	true
UCMMJm4lYxEh7GM4loYh6-SQ	UCIksRr4M8kOqxUTyYDSwy4A	1	true
UCMMJm4lYxEh7GM4loYh6-SQ	UC1_-z9fMYofIUQWYUPoNyTw	1	true
UCMMJm4lYxEh7GM4loYh6-SQ	UCvLNnnIZdqXYqAS-l8FLJFw	1	true
UCMMJm4lYxEh7GM4loYh6-SQ	UC4F32QLrpDmmRrozxr9z59g	1	true
UCMMJm4lYxEh7GM4loYh6-SQ	UCrJ_9o1YxOZiSqTCgKXApEQ	1	true
UCMMJm4lYxEh7GM4loYh6-SQ	UCbrwFkBkzcT9UmskS7g8vdA	1	true
UCMMJm4lYxEh7GM4loYh6-SQ	UC88EfXGkc_98Q8XoZ8k9j7g	1	true
UCMMJm4lYxEh7GM4loYh6-SQ	UCDJlmfZ78gkrO-QkN-damRg	1	true
UCMMJm4lYxEh7GM4loYh6-SQ	UCyhRfD3HkB-0VbFA1prxjxw	1	true
UCMMJm4lYxEh7GM4loYh6-SQ	UCplIRjNdaKLVrAS4D-Dil7Q	1	true
UCuAaB8lLRmoZzOrc_d_Ka0A	UCoa-D_VfMkFrCYodrOC9-mA	1	true
UCuAaB8lLRmoZzOrc_d_Ka0A	UCk0U1Js-um2lRjSF3VoS_3A	6	true
UCuAaB8lLRmoZzOrc_d_Ka0A	UCSv9d0kQegylHWpP83jWSQg	9	true
UCuAaB8lLRmoZzOrc_d_Ka0A	UCV9EVCVbJus_StqIJ89ajLA	1	true
UCuAaB8lLRmoZzOrc_d_Ka0A	UCghJZXv-Cg90zgdeTZCt_-A	5	true
UCuAaB8lLRmoZzOrc_d_Ka0A	UCf2D8X8mRd8-ApAcyoKnTmA	1	true
UCuAaB8lLRmoZzOrc_d_Ka0A	UCPCwZ6sP0cAwgMsGZ23rOYA	2	true
UCuAaB8lLRmoZzOrc_d_Ka0A	UCCWZCP1lQxWvjQUUOWc6dFw	3	true
UCuAaB8lLRmoZzOrc_d_Ka0A	UC42k7FI53tnSSIjgzW-rbLA	30	true
UCuAaB8lLRmoZzOrc_d_Ka0A	UCqF3BLbPXpNGNgsV3oJvDlw	1	true
UCuAaB8lLRmoZzOrc_d_Ka0A	UCAJAbdjUtxGM9zaD_epYpcA	1	true
UCuAaB8lLRmoZzOrc_d_Ka0A	UCLxU3sH6BpHnqDRBXgGmUPw	4	true
UCuAaB8lLRmoZzOrc_d_Ka0A	UCjaWLFTNqLkq3ZY2BJ4NYRg	2	true
UCuAaB8lLRmoZzOrc_d_Ka0A	UCRuR7ytSs0YokBvxr8rM3ZQ	1	true
UCuAaB8lLRmoZzOrc_d_Ka0A	UCz1xVDltULzUhZCJ1TkvnTQ	33	true
UCuAaB8lLRmoZzOrc_d_Ka0A	UC6RQhzm93SterWntL7GzqYQ	1	true
UCuAaB8lLRmoZzOrc_d_Ka0A	UCl01kak5i66hCdS_bCxkkgA	6	true
UCuAaB8lLRmoZzOrc_d_Ka0A	UCA2llkURdTm63bBB3nTBw1w	12	true
UCuAaB8lLRmoZzOrc_d_Ka0A	UCjrmFzNfoXO-We5rT6jB4vg	5	true
UCuAaB8lLRmoZzOrc_d_Ka0A	UC3lP5c55UE0ozG-uN0uBsXg	22	true
UCuAaB8lLRmoZzOrc_d_Ka0A	UCpuW6sUUE2Y0xW-KZhm347A	1	true
UCuAaB8lLRmoZzOrc_d_Ka0A	UCepEtTIMTtU-MbFHz-pOZMw	1	true
UCuAaB8lLRmoZzOrc_d_Ka0A	UCuiLR4p6wQ3xLEm15pEn1Xw	1	true
UCuAaB8lLRmoZzOrc_d_Ka0A	UCbhT_vtlwr7X2wG6q_0mWVQ	6	true
UCuAaB8lLRmoZzOrc_d_Ka0A	UC8hGUtfEgvvnp6IaHSAg1OQ	1	true
UCuAaB8lLRmoZzOrc_d_Ka0A	UCyuDCBA1ig-x1YeAQBX2b4g	2	true
UCuAaB8lLRmoZzOrc_d_Ka0A	UCNFm4lN_IMhpQ_AfbcQAtag	1	true
UCuAaB8lLRmoZzOrc_d_Ka0A	UCUM4-KGZEXC2pk6zRDL9jMQ	2	true
UCuAaB8lLRmoZzOrc_d_Ka0A	UCVPdtCCsEsem4hyVwS_GzOQ	2	true
UCuAaB8lLRmoZzOrc_d_Ka0A	UCmV27tf2iqUZDDtXiShSKUg	2	true
UCuAaB8lLRmoZzOrc_d_Ka0A	UCBjgxj_j4IYH7cq6pM6Aqvw	1	true
UCuAaB8lLRmoZzOrc_d_Ka0A	UCKhy2n1rCRSQNGuyqL-7r-Q	1	true
UCuAaB8lLRmoZzOrc_d_Ka0A	UCLHpzj63LeJ-IoRSGB3V2fg	4	true
UCuAaB8lLRmoZzOrc_d_Ka0A	UCyyD0uZzrvjF4GKsmFBuUOg	1	true
UCuAaB8lLRmoZzOrc_d_Ka0A	UCOqOdxzU58qOGoysdnVXd9Q	12	true
UCuAaB8lLRmoZzOrc_d_Ka0A	UCqWMwhpW-rggQZtfNXIqkrw	1	true
UCuAaB8lLRmoZzOrc_d_Ka0A	UCtzAihT3XrcOS-Q9ReyYpQA	1	true
UCuAaB8lLRmoZzOrc_d_Ka0A	UCGTfGu7XEakOH2wL1Si2rqA	1	true
UCuAaB8lLRmoZzOrc_d_Ka0A	UCVqte8NBusoopmqjIR3RRXg	1	true
UCuAaB8lLRmoZzOrc_d_Ka0A	UCZNhZ_qzHFS7A4OkKHtgQbw	1	true
UCuAaB8lLRmoZzOrc_d_Ka0A	UCRfUfNEJVaY8AbAcb46qX0g	1	true
UChsZDP7pW_08Sk6Tp4U8KJA	UChsZDP7pW_08Sk6Tp4U8KJA	795	true
UChsZDP7pW_08Sk6Tp4U8KJA	UCXuqSBlHAE6Xw-yeJA0Tunw	1	true
UChsZDP7pW_08Sk6Tp4U8KJA	UCDlVDJqYqHYEcgHRn8Mf25g	1	true
UChsZDP7pW_08Sk6Tp4U8KJA	UCuAaB8lLRmoZzOrc_d_Ka0A	3	true
UChsZDP7pW_08Sk6Tp4U8KJA	UCN-opsqqDunWO6h5uCp9Y4g	1	true
UChsZDP7pW_08Sk6Tp4U8KJA	UCN1ihdoKXeixzYi7Hyp4WwQ	1	true
UChsZDP7pW_08Sk6Tp4U8KJA	UC6OUstIo-qXiJzcsJ0toz-A	1	true
UChsZDP7pW_08Sk6Tp4U8KJA	UCz1xVDltULzUhZCJ1TkvnTQ	1	true
UChsZDP7pW_08Sk6Tp4U8KJA	UCDK5XAOArmsSQKZ_kBoYKOA	1	true
UChsZDP7pW_08Sk6Tp4U8KJA	UCP-Vg2PcmLiWpEdvMI1R35w	1	true
UChsZDP7pW_08Sk6Tp4U8KJA	UC9zqTTVeClpqMQ5CLuJdWtw	1	true
UChsZDP7pW_08Sk6Tp4U8KJA	UCthbIFAxbXTTQEC7EcQvP1Q	1	true
UChsZDP7pW_08Sk6Tp4U8KJA	UCSv9d0kQegylHWpP83jWSQg	1	true
UChsZDP7pW_08Sk6Tp4U8KJA	UCCWZCP1lQxWvjQUUOWc6dFw	1	true
UChsZDP7pW_08Sk6Tp4U8KJA	UCwJXtk_1CKlCrh7YJDP2uPw	1	true
UChsZDP7pW_08Sk6Tp4U8KJA	UCsx_IzBUUYlR5f3lfRiXdIA	1	true
UChsZDP7pW_08Sk6Tp4U8KJA	UCXdXYG8dUmEv6jhEji_lSHg	1	true
UChsZDP7pW_08Sk6Tp4U8KJA	UCjaWLFTNqLkq3ZY2BJ4NYRg	1	true
UChsZDP7pW_08Sk6Tp4U8KJA	UCk9mgpQVdJ5oKQWkM1UPBaQ	1	true
UChsZDP7pW_08Sk6Tp4U8KJA	UCHyeOQ0-Td0Dv3xfI0dwu3g	1	true
UChsZDP7pW_08Sk6Tp4U8KJA	UCGILPX9AE6hZpqp1FjFn6pw	1	true
UChsZDP7pW_08Sk6Tp4U8KJA	UCaEplKvlFhyg7P3eBmRtyCQ	1	true
UChsZDP7pW_08Sk6Tp4U8KJA	UCsYo9r-JIEkhoRoc9G5gdpQ	1	true
UChsZDP7pW_08Sk6Tp4U8KJA	UCVqS-HRwe2vq_Jjgu4fg-UA	1	true
UChsZDP7pW_08Sk6Tp4U8KJA	UCWq1xltHB2fDe6YkYoOrryg	1	true
UChsZDP7pW_08Sk6Tp4U8KJA	UC3Ooj_iDWELBumIEDejyNHQ	1	true
UChsZDP7pW_08Sk6Tp4U8KJA	UCP391YRAjSOdM_bwievgaZA	1	true
UChsZDP7pW_08Sk6Tp4U8KJA	UCMMJm4lYxEh7GM4loYh6-SQ	1	true
UChsZDP7pW_08Sk6Tp4U8KJA	UClcatj2SigXMklFrqQtnA-Q	1	true
UChsZDP7pW_08Sk6Tp4U8KJA	UCzYrkkCI1yvqvQyD-j56RIA	1	true
UChsZDP7pW_08Sk6Tp4U8KJA	UCOqOdxzU58qOGoysdnVXd9Q	1	true
UChsZDP7pW_08Sk6Tp4U8KJA	UCmV27tf2iqUZDDtXiShSKUg	1	true
UChsZDP7pW_08Sk6Tp4U8KJA	UC5ZXYxeWlROKbL7JziJ0bIQ	1	true
UChsZDP7pW_08Sk6Tp4U8KJA	UCgbbjw8zPkrmmL_XU1SgJBg	1	true
UChsZDP7pW_08Sk6Tp4U8KJA	UCWo6OpatSyHZijRG_MwObFA	1	true
UChsZDP7pW_08Sk6Tp4U8KJA	UCyuDCBA1ig-x1YeAQBX2b4g	1	true
UChsZDP7pW_08Sk6Tp4U8KJA	UC-v1PJRoid6DGFzY1jVU3hg	1	true
UChsZDP7pW_08Sk6Tp4U8KJA	UCnNvQI_yyWPZGI-rqFhR17Q	1	true
UChsZDP7pW_08Sk6Tp4U8KJA	UCdvm4HMtgMwRCdkE3I7p6ZA	1	true
UChsZDP7pW_08Sk6Tp4U8KJA	UCIu-GZ6a7B-IMyUs1rD629w	1	true
UC8b-2BfQ-PpYKESOfEGhYBQ	UCsT0YIqwnpJCM-mx7-gSA4Q	1	true
UC8b-2BfQ-PpYKESOfEGhYBQ	UCP-Vg2PcmLiWpEdvMI1R35w	1	true
UC8b-2BfQ-PpYKESOfEGhYBQ	UCzbZ2hMCEaD2QR5cMferrnQ	1	true
UC8b-2BfQ-PpYKESOfEGhYBQ	UCSv9d0kQegylHWpP83jWSQg	1	true
UC8b-2BfQ-PpYKESOfEGhYBQ	UCuAaB8lLRmoZzOrc_d_Ka0A	3	true
UC8b-2BfQ-PpYKESOfEGhYBQ	UCoa-D_VfMkFrCYodrOC9-mA	1	true
UC8b-2BfQ-PpYKESOfEGhYBQ	UCXj2oSzwg6G0iBjKg33joMQ	1	true
UC8b-2BfQ-PpYKESOfEGhYBQ	UCPR3gVNYBzi-02_O4noC1Zg	1	true
UC8b-2BfQ-PpYKESOfEGhYBQ	UCkrcoalvMERq3ehh5gH5j0Q	1	true
UC8b-2BfQ-PpYKESOfEGhYBQ	UCHyeOQ0-Td0Dv3xfI0dwu3g	1	true
UC8b-2BfQ-PpYKESOfEGhYBQ	UCYfLDf9dRO6SW0hO2nPewrw	1	true
UC8b-2BfQ-PpYKESOfEGhYBQ	UCghJZXv-Cg90zgdeTZCt_-A	1	true
UC8b-2BfQ-PpYKESOfEGhYBQ	UC1VlEIPGhDqaUsL7Vg__hHA	1	true
UC8b-2BfQ-PpYKESOfEGhYBQ	UC9zqTTVeClpqMQ5CLuJdWtw	2	true
UC8b-2BfQ-PpYKESOfEGhYBQ	UCGILPX9AE6hZpqp1FjFn6pw	1	true
UC8b-2BfQ-PpYKESOfEGhYBQ	UCH2VZQBLFTOp6I_qgnBJCuQ	1	true
UC8b-2BfQ-PpYKESOfEGhYBQ	UCil8_HWnWScf4Xmt4FSdU7w	1	true
UC8b-2BfQ-PpYKESOfEGhYBQ	UCVqS-HRwe2vq_Jjgu4fg-UA	1	true
UC8b-2BfQ-PpYKESOfEGhYBQ	UC-WaPlIfAQP3IuydN6dhbhA	1	true
UC8b-2BfQ-PpYKESOfEGhYBQ	UCW3l9WndLOjhRtsg0Aa--2g	1	true
UC8b-2BfQ-PpYKESOfEGhYBQ	UC3Ooj_iDWELBumIEDejyNHQ	1	true
UC8b-2BfQ-PpYKESOfEGhYBQ	UCf9lX9Vc4CWBUKQxVfZ6MtQ	1	true
UC8b-2BfQ-PpYKESOfEGhYBQ	UC5lg8zKcnJ1rnxR6lPgD1ug	1	true
UC8b-2BfQ-PpYKESOfEGhYBQ	UCMMJm4lYxEh7GM4loYh6-SQ	1	true
UC8b-2BfQ-PpYKESOfEGhYBQ	UCa1o8yRux22rDwRbEjokSPg	1	true
UC8b-2BfQ-PpYKESOfEGhYBQ	UCstv_dyLeuAbDB8ISTfkFbQ	1	true
UC8b-2BfQ-PpYKESOfEGhYBQ	UCsYo9r-JIEkhoRoc9G5gdpQ	1	true
UC8b-2BfQ-PpYKESOfEGhYBQ	UC1LRaE3XaXAanf1XJXgrVIw	1	true
UC8b-2BfQ-PpYKESOfEGhYBQ	UCgbbjw8zPkrmmL_XU1SgJBg	1	true
UC8b-2BfQ-PpYKESOfEGhYBQ	UCdKg0aioEqn_tbfBGz_ltFw	1	true
UC8b-2BfQ-PpYKESOfEGhYBQ	UC9fxSdFjcz5QWDEhYCk_k1w	1	true
UC8b-2BfQ-PpYKESOfEGhYBQ	UCWq1xltHB2fDe6YkYoOrryg	2	true
UC8b-2BfQ-PpYKESOfEGhYBQ	UC5ZXYxeWlROKbL7JziJ0bIQ	1	true
UC8b-2BfQ-PpYKESOfEGhYBQ	UCnNvQI_yyWPZGI-rqFhR17Q	1	true
UC8b-2BfQ-PpYKESOfEGhYBQ	UC05bDtSYUcR0nLkzFA1mCVQ	1	true
UC8b-2BfQ-PpYKESOfEGhYBQ	UCxbqmMsXory_zC-kNqKHUgw	1	true
UC8b-2BfQ-PpYKESOfEGhYBQ	UCyuDCBA1ig-x1YeAQBX2b4g	1	true
UC8b-2BfQ-PpYKESOfEGhYBQ	UCmV27tf2iqUZDDtXiShSKUg	1	true
UC8b-2BfQ-PpYKESOfEGhYBQ	UC2mdv67uDPQO35IYkzK_Xzw	1	true
UC8b-2BfQ-PpYKESOfEGhYBQ	UCKgnnXJi7Ua2t6b6ByQizrg	1	true
UC8b-2BfQ-PpYKESOfEGhYBQ	UCsAMQ6_-iRdEWBVh8q-IXmA	1	true
UC8b-2BfQ-PpYKESOfEGhYBQ	UC1_-z9fMYofIUQWYUPoNyTw	1	true
UC8b-2BfQ-PpYKESOfEGhYBQ	UCvLNnnIZdqXYqAS-l8FLJFw	1	true
UC8b-2BfQ-PpYKESOfEGhYBQ	UCT913ORodTxCG9HdXroYPtQ	1	true
UC8b-2BfQ-PpYKESOfEGhYBQ	UC3vZWDAhX5356m17Vy1B2GA	1	true
UCGILPX9AE6hZpqp1FjFn6pw	UCsT0YIqwnpJCM-mx7-gSA4Q	1	true
UCGILPX9AE6hZpqp1FjFn6pw	UCQdOZmbeT9UoQy8G3zeNE-g	1	true
UCGILPX9AE6hZpqp1FjFn6pw	UCGILPX9AE6hZpqp1FjFn6pw	147	true
UCGILPX9AE6hZpqp1FjFn6pw	UCk0U1Js-um2lRjSF3VoS_3A	1	true
UCGILPX9AE6hZpqp1FjFn6pw	UCmpHPgeCBgvk_fDXZQKsnAA	2	true
UCGILPX9AE6hZpqp1FjFn6pw	UCuAaB8lLRmoZzOrc_d_Ka0A	2	true
UCGILPX9AE6hZpqp1FjFn6pw	UC42k7FI53tnSSIjgzW-rbLA	3	true
UCGILPX9AE6hZpqp1FjFn6pw	UCKtJs_zI1yzswHDWqkqHtWw	1	true
UCGILPX9AE6hZpqp1FjFn6pw	UCqALeERk6OhLGaG_PIG_RJA	2	true
UCGILPX9AE6hZpqp1FjFn6pw	UC9zqTTVeClpqMQ5CLuJdWtw	3	true
UCGILPX9AE6hZpqp1FjFn6pw	UCO5eykNr9w8p5eoGQz3AFfg	1	true
UCGILPX9AE6hZpqp1FjFn6pw	UC7MUmXqD_kEChxYFME0bdtg	1	true
UCGILPX9AE6hZpqp1FjFn6pw	UC3lP5c55UE0ozG-uN0uBsXg	6	true
UCGILPX9AE6hZpqp1FjFn6pw	UCHyeOQ0-Td0Dv3xfI0dwu3g	1	true
UCGILPX9AE6hZpqp1FjFn6pw	UCjaWLFTNqLkq3ZY2BJ4NYRg	1	true
UCGILPX9AE6hZpqp1FjFn6pw	UC2qRcwgwOLchPYFPqCCHVhQ	1	true
UCGILPX9AE6hZpqp1FjFn6pw	UCP391YRAjSOdM_bwievgaZA	3	true
UCGILPX9AE6hZpqp1FjFn6pw	UC1VlEIPGhDqaUsL7Vg__hHA	1	true
UCGILPX9AE6hZpqp1FjFn6pw	UCYj7NQWLydGknpR7iQSmqwQ	1	true
UCGILPX9AE6hZpqp1FjFn6pw	UC1LRaE3XaXAanf1XJXgrVIw	1	true
UCGILPX9AE6hZpqp1FjFn6pw	UCH2VZQBLFTOp6I_qgnBJCuQ	1	true
UCGILPX9AE6hZpqp1FjFn6pw	UCMMJm4lYxEh7GM4loYh6-SQ	1	true
UCGILPX9AE6hZpqp1FjFn6pw	UC3Ooj_iDWELBumIEDejyNHQ	1	true
UCGILPX9AE6hZpqp1FjFn6pw	UCgbbjw8zPkrmmL_XU1SgJBg	1	true
UCGILPX9AE6hZpqp1FjFn6pw	UC9fxSdFjcz5QWDEhYCk_k1w	1	true
UCGILPX9AE6hZpqp1FjFn6pw	UCWq1xltHB2fDe6YkYoOrryg	2	true
UCGILPX9AE6hZpqp1FjFn6pw	UCnNvQI_yyWPZGI-rqFhR17Q	1	true
UCGILPX9AE6hZpqp1FjFn6pw	UCJUhAFvFypnG_E7vWimQQYw	1	true
UCGILPX9AE6hZpqp1FjFn6pw	UClqvSr61scd7sRpMdSFj62A	1	true
UCGILPX9AE6hZpqp1FjFn6pw	UCvLNnnIZdqXYqAS-l8FLJFw	1	true
UCGILPX9AE6hZpqp1FjFn6pw	UCdKg0aioEqn_tbfBGz_ltFw	1	true
UCGILPX9AE6hZpqp1FjFn6pw	UC5xF-T4J_uM0NrCkOO5e0PQ	1	true
UCGILPX9AE6hZpqp1FjFn6pw	UCWJh6eAkARp1XWCrqNxsRWQ	1	true
UCGILPX9AE6hZpqp1FjFn6pw	UC3vZWDAhX5356m17Vy1B2GA	1	true
UC3Ooj_iDWELBumIEDejyNHQ	UClu474HMt895mVxZdlIHXEA	7	true
UC3Ooj_iDWELBumIEDejyNHQ	UCPCwZ6sP0cAwgMsGZ23rOYA	1	true
UC3Ooj_iDWELBumIEDejyNHQ	UC3Ooj_iDWELBumIEDejyNHQ	162	true
UC3Ooj_iDWELBumIEDejyNHQ	UCG-eghyORxNrzSG8FkAWKyw	1	true
UC3Ooj_iDWELBumIEDejyNHQ	UCPR3gVNYBzi-02_O4noC1Zg	1	true
UC3Ooj_iDWELBumIEDejyNHQ	UCMYTIyqS1-7wT-3pBB8bR5A	1	true
UC3Ooj_iDWELBumIEDejyNHQ	UCA1nC2t2zfzBOySscmpIzGQ	1	true
UC3Ooj_iDWELBumIEDejyNHQ	UCdGpd0gNn38UKwoncZd9rmA	9	true
UC3Ooj_iDWELBumIEDejyNHQ	UCORRcj9wv5DEYCEg2LhBcLQ	1	true
UC3Ooj_iDWELBumIEDejyNHQ	UC9zqTTVeClpqMQ5CLuJdWtw	2	true
UC3Ooj_iDWELBumIEDejyNHQ	UCB0zinWfy-dS_NqcOINYo3A	3	true
UC3Ooj_iDWELBumIEDejyNHQ	UCSv9d0kQegylHWpP83jWSQg	1	true
UC3Ooj_iDWELBumIEDejyNHQ	UCKtJs_zI1yzswHDWqkqHtWw	1	true
UC3Ooj_iDWELBumIEDejyNHQ	UCqZN-NqgP7bhbctbyThSVUA	1	true
UC3Ooj_iDWELBumIEDejyNHQ	UC0ABb9XMjG8M_rmxbxtW6Qw	1	true
UC3Ooj_iDWELBumIEDejyNHQ	UCmEClzCBDx-vrt0GuSKBd9g	1	true
UC3Ooj_iDWELBumIEDejyNHQ	UCuAaB8lLRmoZzOrc_d_Ka0A	1	true
UC3Ooj_iDWELBumIEDejyNHQ	UChHd-MU2mOvZHmBQz6zJw_w	1	true
UC3Ooj_iDWELBumIEDejyNHQ	UCHyeOQ0-Td0Dv3xfI0dwu3g	1	true
UC3Ooj_iDWELBumIEDejyNHQ	UCbrt8UdV49AqgT7-VaXmlwQ	2	true
UC3Ooj_iDWELBumIEDejyNHQ	UCXj2oSzwg6G0iBjKg33joMQ	1	true
UC3Ooj_iDWELBumIEDejyNHQ	UCGfBE94turq_hyKMxB-Dfrg	1	true
UC3Ooj_iDWELBumIEDejyNHQ	UCH2VZQBLFTOp6I_qgnBJCuQ	2	true
UC3Ooj_iDWELBumIEDejyNHQ	UCGILPX9AE6hZpqp1FjFn6pw	1	true
UC3Ooj_iDWELBumIEDejyNHQ	UCsYo9r-JIEkhoRoc9G5gdpQ	1	true
UC3Ooj_iDWELBumIEDejyNHQ	UC_Z84H0f59mA9EuC5mlv6og	1	true
UC3Ooj_iDWELBumIEDejyNHQ	UCMMJm4lYxEh7GM4loYh6-SQ	1	true
UC3Ooj_iDWELBumIEDejyNHQ	UCLXl1V6n82Dyg1VhVgSL0nw	1	true
UC3Ooj_iDWELBumIEDejyNHQ	UCUgarxqakK33XeFA4nHG2HA	1	true
UC3Ooj_iDWELBumIEDejyNHQ	UCWq1xltHB2fDe6YkYoOrryg	12	true
UC3Ooj_iDWELBumIEDejyNHQ	UCn9Erjy00mpnWeLnRqhsA1g	4	true
UC3Ooj_iDWELBumIEDejyNHQ	UC876uazcW8p7wdl3JdbVIaA	1	true
UC3Ooj_iDWELBumIEDejyNHQ	UC65OaKMLtpEUs9BiLSb_u1g	5	true
UC3Ooj_iDWELBumIEDejyNHQ	UCV8ZgEjwdNnZC4_FJtdDFCg	1	true
UC3Ooj_iDWELBumIEDejyNHQ	UCl10NIdDOn9MMWdKNyo_YdA	4	true
UC3Ooj_iDWELBumIEDejyNHQ	UC9fxSdFjcz5QWDEhYCk_k1w	1	true
UC3Ooj_iDWELBumIEDejyNHQ	UCcI3UJ_rLFMKUrN-b1GW5kQ	1	true
UC3Ooj_iDWELBumIEDejyNHQ	UCgbbjw8zPkrmmL_XU1SgJBg	1	true
UC3Ooj_iDWELBumIEDejyNHQ	UCqZED4i9O2lBwNZ24bJ91ew	1	true
UC3Ooj_iDWELBumIEDejyNHQ	UC7nrDOILJlfqGB8gX0F4jhQ	2	true
UC3Ooj_iDWELBumIEDejyNHQ	UCyuDCBA1ig-x1YeAQBX2b4g	1	true
UC3Ooj_iDWELBumIEDejyNHQ	UCflCE9dixPqeC_EaSqQAqrw	1	true
UC3Ooj_iDWELBumIEDejyNHQ	UCsCeWWW8sk8zDaPzw6Ll67g	1	true
UC3Ooj_iDWELBumIEDejyNHQ	UCnNvQI_yyWPZGI-rqFhR17Q	1	true
UC3Ooj_iDWELBumIEDejyNHQ	UC-NwgkrLPYmzM-xoLr2GX-Q	2	true
UC3Ooj_iDWELBumIEDejyNHQ	UC2mdv67uDPQO35IYkzK_Xzw	1	true
UC3Ooj_iDWELBumIEDejyNHQ	UC96qopSyu7Ga75jW3HEO88w	5	true
UC3Ooj_iDWELBumIEDejyNHQ	UCvLNnnIZdqXYqAS-l8FLJFw	1	true
UC3Ooj_iDWELBumIEDejyNHQ	UC1_-z9fMYofIUQWYUPoNyTw	1	true
UC3Ooj_iDWELBumIEDejyNHQ	UCjeezibK8QMXYalufkuuSXg	1	true
UC3Ooj_iDWELBumIEDejyNHQ	UC3vZWDAhX5356m17Vy1B2GA	1	true
UC3Ooj_iDWELBumIEDejyNHQ	UCstACT0WwMpTjTrbpFYk16Q	14	true
UCu_a6PAzp30Bn2mM-Ll09LA	UCthbIFAxbXTTQEC7EcQvP1Q	4	true
UCu_a6PAzp30Bn2mM-Ll09LA	UCP-Vg2PcmLiWpEdvMI1R35w	2	true
UCu_a6PAzp30Bn2mM-Ll09LA	UCfYrK5JU5EznsnK3wQE7iIg	6	true
UCu_a6PAzp30Bn2mM-Ll09LA	UCN-opsqqDunWO6h5uCp9Y4g	14	true
UCu_a6PAzp30Bn2mM-Ll09LA	UCuiLR4p6wQ3xLEm15pEn1Xw	4	true
UCu_a6PAzp30Bn2mM-Ll09LA	UCu_a6PAzp30Bn2mM-Ll09LA	37	true
UCu_a6PAzp30Bn2mM-Ll09LA	UC4zG6UeNUn-HM6UEFFkiESA	1	true
UCu_a6PAzp30Bn2mM-Ll09LA	UC4MWeXk20bRyIGQsiZXPe6Q	1	true
UCu_a6PAzp30Bn2mM-Ll09LA	UC9zqTTVeClpqMQ5CLuJdWtw	6	true
UCu_a6PAzp30Bn2mM-Ll09LA	UC_53VGoH_0XLFmYVpGMvhvg	1	true
UCu_a6PAzp30Bn2mM-Ll09LA	UCG-eghyORxNrzSG8FkAWKyw	6	true
UCu_a6PAzp30Bn2mM-Ll09LA	UCjaWLFTNqLkq3ZY2BJ4NYRg	9	true
UCu_a6PAzp30Bn2mM-Ll09LA	UCXdXYG8dUmEv6jhEji_lSHg	1	true
UCu_a6PAzp30Bn2mM-Ll09LA	UC12zKGLhMhDeDidoctM6BrA	11	true
UCu_a6PAzp30Bn2mM-Ll09LA	UCT0JugAtGmqiYkwxFZOwAtg	1	true
UCu_a6PAzp30Bn2mM-Ll09LA	UCv2svvDbMNunUuPs8hUUKVA	4	true
UCu_a6PAzp30Bn2mM-Ll09LA	UCDtVoSwSwQgwhcC89Nlz5Vg	4	true
UCu_a6PAzp30Bn2mM-Ll09LA	UCoa-D_VfMkFrCYodrOC9-mA	4	true
UCu_a6PAzp30Bn2mM-Ll09LA	UCJWBZ_U49wLgqS5fefJ7STw	1	true
UCu_a6PAzp30Bn2mM-Ll09LA	UCH2VZQBLFTOp6I_qgnBJCuQ	1	true
UCu_a6PAzp30Bn2mM-Ll09LA	UCXj2oSzwg6G0iBjKg33joMQ	3	true
UCu_a6PAzp30Bn2mM-Ll09LA	UCAcUmC0FOroQoAWA5TlX1-g	1	true
UCu_a6PAzp30Bn2mM-Ll09LA	UCVrKQMmA2ew9LFzeIDaOFgw	12	true
UCu_a6PAzp30Bn2mM-Ll09LA	UCMYTIyqS1-7wT-3pBB8bR5A	6	true
UCu_a6PAzp30Bn2mM-Ll09LA	UCk9mgpQVdJ5oKQWkM1UPBaQ	2	true
UCu_a6PAzp30Bn2mM-Ll09LA	UCwVmZjJwkCUCOes5_eAIebg	2	true
UCu_a6PAzp30Bn2mM-Ll09LA	UCP391YRAjSOdM_bwievgaZA	10	true
UCu_a6PAzp30Bn2mM-Ll09LA	UCp6tx5isUZCgQnvEwbOVC-Q	6	true
UCu_a6PAzp30Bn2mM-Ll09LA	UCSv9d0kQegylHWpP83jWSQg	1	true
UCu_a6PAzp30Bn2mM-Ll09LA	UCm17GAihi4NAVEnA1n4WajQ	4	true
UCu_a6PAzp30Bn2mM-Ll09LA	UClu474HMt895mVxZdlIHXEA	1	true
UCu_a6PAzp30Bn2mM-Ll09LA	UCOwuzVSWrrAdRIviGN7-T5g	1	true
UCu_a6PAzp30Bn2mM-Ll09LA	UC1Nm7gQCcGvgLyVcGTXp-Ww	2	true
UCu_a6PAzp30Bn2mM-Ll09LA	UCqZN-NqgP7bhbctbyThSVUA	1	true
UCu_a6PAzp30Bn2mM-Ll09LA	UCmpHPgeCBgvk_fDXZQKsnAA	5	true
UCu_a6PAzp30Bn2mM-Ll09LA	UCGfBE94turq_hyKMxB-Dfrg	4	true
UCu_a6PAzp30Bn2mM-Ll09LA	UCNl_i-ggJbZNyOLlhE7yyhw	7	true
UCu_a6PAzp30Bn2mM-Ll09LA	UCK6QegB9LU1tIsslcT6KVAA	1	true
UCu_a6PAzp30Bn2mM-Ll09LA	UCcoPc-BqFPkVkkwyS35J-ng	1	true
UCu_a6PAzp30Bn2mM-Ll09LA	UCUmEPYxmnyQDeRUcFkslmQw	4	true
UCu_a6PAzp30Bn2mM-Ll09LA	UCdGpd0gNn38UKwoncZd9rmA	1	true
UCu_a6PAzp30Bn2mM-Ll09LA	UCMPvF9GYUeAT3D-AjEpmd0A	1	true
UCu_a6PAzp30Bn2mM-Ll09LA	UC1UHfW5LkMIlz6FHnEHbXlQ	1	true
UCu_a6PAzp30Bn2mM-Ll09LA	UCoyhq57ClXRTd4h8vpiMelA	1	true
UCu_a6PAzp30Bn2mM-Ll09LA	UC4F32QLrpDmmRrozxr9z59g	1	true
UCu_a6PAzp30Bn2mM-Ll09LA	UCrRLxJiZvwAAWj0bcxdvPAA	1	true
UCu_a6PAzp30Bn2mM-Ll09LA	UCdKJlY5eAoSumIlcOcYxIGg	1	true
UCu_a6PAzp30Bn2mM-Ll09LA	UCxt_nr6Xwbq4O2Ur9ZBpgAA	1	true
UCu_a6PAzp30Bn2mM-Ll09LA	UCUtDAMp91VCfHTZ9_ypKRPA	4	true
UCu_a6PAzp30Bn2mM-Ll09LA	UCN1ihdoKXeixzYi7Hyp4WwQ	1	true
UCu_a6PAzp30Bn2mM-Ll09LA	UClbxmHMltUriVoElCp_izag	1	true
UCyuDCBA1ig-x1YeAQBX2b4g	UCml_Re6YwhQAI-F4Rwtlqdw	1	true
UCyuDCBA1ig-x1YeAQBX2b4g	UCuAaB8lLRmoZzOrc_d_Ka0A	3	true
UCyuDCBA1ig-x1YeAQBX2b4g	UCMYTIyqS1-7wT-3pBB8bR5A	3	true
UCyuDCBA1ig-x1YeAQBX2b4g	UC12zKGLhMhDeDidoctM6BrA	2	true
UCyuDCBA1ig-x1YeAQBX2b4g	UCKtJs_zI1yzswHDWqkqHtWw	1	true
UCyuDCBA1ig-x1YeAQBX2b4g	UCn_lk0txtL2jH6NoVPMb3XA	1	true
UCyuDCBA1ig-x1YeAQBX2b4g	UCE0KRm8m9_ki8MrMYGyjpAw	1	true
UCyuDCBA1ig-x1YeAQBX2b4g	UCyuDCBA1ig-x1YeAQBX2b4g	23	true
UCyuDCBA1ig-x1YeAQBX2b4g	UCjaWLFTNqLkq3ZY2BJ4NYRg	2	true
UCyuDCBA1ig-x1YeAQBX2b4g	UCFl00VTEDEA0cHCoMQ7CuZg	1	true
UCyuDCBA1ig-x1YeAQBX2b4g	UCDtVoSwSwQgwhcC89Nlz5Vg	3	true
UCyuDCBA1ig-x1YeAQBX2b4g	UC9zqTTVeClpqMQ5CLuJdWtw	3	true
UCyuDCBA1ig-x1YeAQBX2b4g	UC45WrWwAypYvlhYbuG9UNqQ	1	true
UCyuDCBA1ig-x1YeAQBX2b4g	UCGfBE94turq_hyKMxB-Dfrg	1	true
UCyuDCBA1ig-x1YeAQBX2b4g	UCSv9d0kQegylHWpP83jWSQg	1	true
UCyuDCBA1ig-x1YeAQBX2b4g	UCzzv3f3UIhYZlIeuOl2QH9Q	1	true
UCyuDCBA1ig-x1YeAQBX2b4g	UCeoHCxOOPTeT9Pp_qi8HmHg	1	true
UCyuDCBA1ig-x1YeAQBX2b4g	UC3O9y5JRSBqn4YhCEvBys_Q	1	true
UCyuDCBA1ig-x1YeAQBX2b4g	UCW3l9WndLOjhRtsg0Aa--2g	1	true
UCyuDCBA1ig-x1YeAQBX2b4g	UCNmv_2YqryuyhB79ehzOsmQ	1	true
UCyuDCBA1ig-x1YeAQBX2b4g	UCUtDAMp91VCfHTZ9_ypKRPA	2	true
UCyuDCBA1ig-x1YeAQBX2b4g	UCP3OzsCj60Z9kZlBPOFXh9Q	1	true
UCyuDCBA1ig-x1YeAQBX2b4g	UC8IbAhPglJ1OeC44A_Gtmqg	1	true
UCyuDCBA1ig-x1YeAQBX2b4g	UCJlShHvhjZ464BnJ8yrkeJA	1	true
UCyuDCBA1ig-x1YeAQBX2b4g	UChHd-MU2mOvZHmBQz6zJw_w	1	true
UCyuDCBA1ig-x1YeAQBX2b4g	UCCD5yY6oDcu-PvLnP4FIJ8A	2	true
UCyuDCBA1ig-x1YeAQBX2b4g	UCxucJ9P3mLMneYypLZYn2uw	1	true
UCyuDCBA1ig-x1YeAQBX2b4g	UCCWZCP1lQxWvjQUUOWc6dFw	1	true
UCyuDCBA1ig-x1YeAQBX2b4g	UCGILPX9AE6hZpqp1FjFn6pw	2	true
UCyuDCBA1ig-x1YeAQBX2b4g	UCHyeOQ0-Td0Dv3xfI0dwu3g	1	true
UCyuDCBA1ig-x1YeAQBX2b4g	UC1VlEIPGhDqaUsL7Vg__hHA	1	true
UCyuDCBA1ig-x1YeAQBX2b4g	UCcVeBJf9jm5xgZbs7rrLUPQ	1	true
UCyuDCBA1ig-x1YeAQBX2b4g	UCMMJm4lYxEh7GM4loYh6-SQ	1	true
UCyuDCBA1ig-x1YeAQBX2b4g	UC42k7FI53tnSSIjgzW-rbLA	1	true
UCyuDCBA1ig-x1YeAQBX2b4g	UCSVt-nsguS0hx3d2N37E--w	1	true
UCyuDCBA1ig-x1YeAQBX2b4g	UCvJ1AGdJwRhGWM5n6D-SX9w	1	true
UCyuDCBA1ig-x1YeAQBX2b4g	UCNX-i6w11LltMBn66PacOfQ	1	true
UCyuDCBA1ig-x1YeAQBX2b4g	UCgbbjw8zPkrmmL_XU1SgJBg	1	true
UCyuDCBA1ig-x1YeAQBX2b4g	UCDbSk1EuJeXL2sCis8cvo-g	1	true
UCyuDCBA1ig-x1YeAQBX2b4g	UCV306eHqgo0LvBf3Mh36AHg	1	true
UCyuDCBA1ig-x1YeAQBX2b4g	UCmV27tf2iqUZDDtXiShSKUg	1	true
UCyuDCBA1ig-x1YeAQBX2b4g	UCcSJI9MVSPEhKt5OnOv2Mdw	1	true
UCyuDCBA1ig-x1YeAQBX2b4g	UCnNvQI_yyWPZGI-rqFhR17Q	1	true
UCyuDCBA1ig-x1YeAQBX2b4g	UChFmohIxapcro2kigBCT_AQ	1	true
UCyuDCBA1ig-x1YeAQBX2b4g	UC2mdv67uDPQO35IYkzK_Xzw	1	true
UCyuDCBA1ig-x1YeAQBX2b4g	UCOqOdxzU58qOGoysdnVXd9Q	1	true
UCyuDCBA1ig-x1YeAQBX2b4g	UCrOvuxLgXoH35EwUh9kRceg	1	true
UCyuDCBA1ig-x1YeAQBX2b4g	UCKWtY_NSa3xTkz0YT28QNSg	1	true
UCyuDCBA1ig-x1YeAQBX2b4g	UCR418yAQHUxufBCGUmwLMVg	1	true
UCyuDCBA1ig-x1YeAQBX2b4g	UCj0aH1oJz-m3n6TDW-Ly20w	1	true
UCyuDCBA1ig-x1YeAQBX2b4g	UC3vZWDAhX5356m17Vy1B2GA	1	true
UCyuDCBA1ig-x1YeAQBX2b4g	UCHksAPatc-89V85O6KgGXTg	1	true
UCP391YRAjSOdM_bwievgaZA	UCT2X19JJaJGUN7mrYuImANQ	7	true
UCP391YRAjSOdM_bwievgaZA	UCvgfXK4nTYKudb0rFR6noLA	7	true
UCP391YRAjSOdM_bwievgaZA	UCsTcErHg8oDvUnTzoqsYeNw	7	true
UCP391YRAjSOdM_bwievgaZA	UCGwu0nbY2wSkW8N-cghnLpA	7	true
UCP391YRAjSOdM_bwievgaZA	UC789h3eqw0H1HqGmIsI26OA	7	true
UCP391YRAjSOdM_bwievgaZA	UCX6OQ3DkcsbYNE6H8uQQuVA	7	true
UCP391YRAjSOdM_bwievgaZA	UCwO_xoYm2vjhu4kZSxFO5mA	7	true
UCP391YRAjSOdM_bwievgaZA	UCMNmwqCtCSpftrbvR3KkHDA	7	true
UCP391YRAjSOdM_bwievgaZA	UCZWlScCmjiezyIRAybUgXYQ	7	true
UCP391YRAjSOdM_bwievgaZA	UCilwZiBBfI9X6yiZRzWty8Q	6	true
UCP391YRAjSOdM_bwievgaZA	UC3EFKdXAU99j3ppGgvTz7XQ	6	true
UCthbIFAxbXTTQEC7EcQvP1Q	UCthbIFAxbXTTQEC7EcQvP1Q	221	true
UCthbIFAxbXTTQEC7EcQvP1Q	UCP-Vg2PcmLiWpEdvMI1R35w	1	true
UCthbIFAxbXTTQEC7EcQvP1Q	UCMYTIyqS1-7wT-3pBB8bR5A	1	true
UCthbIFAxbXTTQEC7EcQvP1Q	UCN-opsqqDunWO6h5uCp9Y4g	4	true
UCthbIFAxbXTTQEC7EcQvP1Q	UC4zG6UeNUn-HM6UEFFkiESA	5	true
UCthbIFAxbXTTQEC7EcQvP1Q	UCv2svvDbMNunUuPs8hUUKVA	1	true
UCthbIFAxbXTTQEC7EcQvP1Q	UCEWHPFNilsT0IfQfutVzsag	2	true
UCthbIFAxbXTTQEC7EcQvP1Q	UCG-eghyORxNrzSG8FkAWKyw	6	true
UCthbIFAxbXTTQEC7EcQvP1Q	UC2mmP8ysfyko40KSn90x6Og	3	true
UCthbIFAxbXTTQEC7EcQvP1Q	UC12zKGLhMhDeDidoctM6BrA	3	true
UCthbIFAxbXTTQEC7EcQvP1Q	UCDtVoSwSwQgwhcC89Nlz5Vg	1	true
UCthbIFAxbXTTQEC7EcQvP1Q	UCk9mgpQVdJ5oKQWkM1UPBaQ	1	true
UCthbIFAxbXTTQEC7EcQvP1Q	UCOQ_KwPhg3IZbigiK7NCnfQ	1	true
UCthbIFAxbXTTQEC7EcQvP1Q	UC9zqTTVeClpqMQ5CLuJdWtw	13	true
UCthbIFAxbXTTQEC7EcQvP1Q	UCmpHPgeCBgvk_fDXZQKsnAA	2	true
UCthbIFAxbXTTQEC7EcQvP1Q	UCH2VZQBLFTOp6I_qgnBJCuQ	3	true
UCthbIFAxbXTTQEC7EcQvP1Q	UCP391YRAjSOdM_bwievgaZA	23	true
UCthbIFAxbXTTQEC7EcQvP1Q	UCq8ChnGCYMVCzDgGMK9e91A	4	true
UCthbIFAxbXTTQEC7EcQvP1Q	UCu_a6PAzp30Bn2mM-Ll09LA	3	true
UCthbIFAxbXTTQEC7EcQvP1Q	UCh7TUTXojlE8vRtb-EnuDzw	1	true
UCthbIFAxbXTTQEC7EcQvP1Q	UCbAiIkPobUFy71zlmwVw3jw	1	true
UCthbIFAxbXTTQEC7EcQvP1Q	UCjaWLFTNqLkq3ZY2BJ4NYRg	1	true
UCthbIFAxbXTTQEC7EcQvP1Q	UCoa-D_VfMkFrCYodrOC9-mA	3	true
UCthbIFAxbXTTQEC7EcQvP1Q	UClu474HMt895mVxZdlIHXEA	2	true
UCthbIFAxbXTTQEC7EcQvP1Q	UCV306eHqgo0LvBf3Mh36AHg	1	true
UCthbIFAxbXTTQEC7EcQvP1Q	UCp6tx5isUZCgQnvEwbOVC-Q	1	true
UCthbIFAxbXTTQEC7EcQvP1Q	UCqZN-NqgP7bhbctbyThSVUA	3	true
UCthbIFAxbXTTQEC7EcQvP1Q	UCcoPc-BqFPkVkkwyS35J-ng	4	true
UCthbIFAxbXTTQEC7EcQvP1Q	UCGfBE94turq_hyKMxB-Dfrg	1	true
UCthbIFAxbXTTQEC7EcQvP1Q	UCtrjFP7i92_30uv6IehwE5Q	1	true
UCthbIFAxbXTTQEC7EcQvP1Q	UCUp-GSUuNxSZ7cxOg7ZnyqA	3	true
UCthbIFAxbXTTQEC7EcQvP1Q	UCNl_i-ggJbZNyOLlhE7yyhw	1	true
UCthbIFAxbXTTQEC7EcQvP1Q	UCm17GAihi4NAVEnA1n4WajQ	2	true
UCthbIFAxbXTTQEC7EcQvP1Q	UCVrKQMmA2ew9LFzeIDaOFgw	2	true
UCthbIFAxbXTTQEC7EcQvP1Q	UC-6xqzMBF2CXTImn_a4aCVg	1	true
UCthbIFAxbXTTQEC7EcQvP1Q	UCbeCLZ2E_oD071BkTCw5uRQ	1	true
UCthbIFAxbXTTQEC7EcQvP1Q	UCjjYaSHsZSUNTSwUV8OfOrA	1	true
UCthbIFAxbXTTQEC7EcQvP1Q	UCdGpd0gNn38UKwoncZd9rmA	5	true
UCthbIFAxbXTTQEC7EcQvP1Q	UCun1gF57-Kv35uXZQ6Bn78A	1	true
UCthbIFAxbXTTQEC7EcQvP1Q	UCsgHWN8lYveMUEWTDheTjZA	3	true
UCthbIFAxbXTTQEC7EcQvP1Q	UCPQqOZhDKr9AjLfXDOjoaww	3	true
UCthbIFAxbXTTQEC7EcQvP1Q	UCy7oVBYY0FGXeeJpy6ITXxQ	1	true
UCthbIFAxbXTTQEC7EcQvP1Q	UCQNi2fXhCHRu8-b-w29SMCA	1	true
UCthbIFAxbXTTQEC7EcQvP1Q	UCLWAkPY5RjvCuwJu_C3Ok-A	2	true
UCthbIFAxbXTTQEC7EcQvP1Q	UCUmEPYxmnyQDeRUcFkslmQw	1	true
UCthbIFAxbXTTQEC7EcQvP1Q	UCwVmZjJwkCUCOes5_eAIebg	1	true
UCthbIFAxbXTTQEC7EcQvP1Q	UC7qK1TCeLAr8qOeclO-s39g	1	true
UCthbIFAxbXTTQEC7EcQvP1Q	UC4F32QLrpDmmRrozxr9z59g	2	true
UCthbIFAxbXTTQEC7EcQvP1Q	UCQz-h9kq50OxKmU2yGoOWlg	1	true
UCthbIFAxbXTTQEC7EcQvP1Q	UCkSjy-IOEq-eMtarZl2uH1Q	1	true
UCthbIFAxbXTTQEC7EcQvP1Q	UCSyUhW3u3JazIT3VtE4nCEw	1	true
UCthbIFAxbXTTQEC7EcQvP1Q	UCr0NQAx7C64fOrNxVdc8gYA	1	true
UCthbIFAxbXTTQEC7EcQvP1Q	UCyCMHHF9TRBEPhzDwDHDZEQ	1	true
UCH2VZQBLFTOp6I_qgnBJCuQ	UCH2VZQBLFTOp6I_qgnBJCuQ	260	true
UCH2VZQBLFTOp6I_qgnBJCuQ	UC0otZdGYsA9KqVKAcn2peQA	1	true
UCH2VZQBLFTOp6I_qgnBJCuQ	UCF5OxapO7zJUkX9EYvGwN_Q	7	true
UCH2VZQBLFTOp6I_qgnBJCuQ	UCV306eHqgo0LvBf3Mh36AHg	15	true
UCH2VZQBLFTOp6I_qgnBJCuQ	UCuxfOdbKQy0tgGXcm9sjHiw	4	true
UCH2VZQBLFTOp6I_qgnBJCuQ	UCn9Erjy00mpnWeLnRqhsA1g	9	true
UCH2VZQBLFTOp6I_qgnBJCuQ	UCj0O6W8yDuLg3iraAXKgCrQ	5	true
UCH2VZQBLFTOp6I_qgnBJCuQ	UCgWOsOjYMJyndvwyU9gzBKQ	1	true
UCH2VZQBLFTOp6I_qgnBJCuQ	UCIQPHl1WKKTt9KkWyo_JNig	34	true
UCH2VZQBLFTOp6I_qgnBJCuQ	UC13ikrGSy3E2AveqLAI9lqg	2	true
UCH2VZQBLFTOp6I_qgnBJCuQ	UClu474HMt895mVxZdlIHXEA	8	true
UCH2VZQBLFTOp6I_qgnBJCuQ	UCjWw8sBL0PPZLPxusmNLvAQ	1	true
UCH2VZQBLFTOp6I_qgnBJCuQ	UCzGwyAyWLB2Si6VDFpq8rjw	2	true
UCH2VZQBLFTOp6I_qgnBJCuQ	UCJWCecuSUa9CsNQ4MGJ_g3A	2	true
UCH2VZQBLFTOp6I_qgnBJCuQ	UCthbIFAxbXTTQEC7EcQvP1Q	2	true
UCH2VZQBLFTOp6I_qgnBJCuQ	UCweLVJlESUt6fCdDFeDXgcA	7	true
UCH2VZQBLFTOp6I_qgnBJCuQ	UCnU2EtUW8Z4DxSqXxJ5cMQg	3	true
UCH2VZQBLFTOp6I_qgnBJCuQ	UCKHhA5hN2UohhFDfNXB_cvQ	6	true
UCH2VZQBLFTOp6I_qgnBJCuQ	UCtrjFP7i92_30uv6IehwE5Q	2	true
UCH2VZQBLFTOp6I_qgnBJCuQ	UCB0zinWfy-dS_NqcOINYo3A	1	true
UCH2VZQBLFTOp6I_qgnBJCuQ	UCk5P5ft8WxlmBrvwmqmYLwQ	1	true
UCH2VZQBLFTOp6I_qgnBJCuQ	UCaSAM5kna2KyX-uVLSGr8PQ	1	true
UCH2VZQBLFTOp6I_qgnBJCuQ	UCmEClzCBDx-vrt0GuSKBd9g	5	true
UCH2VZQBLFTOp6I_qgnBJCuQ	UCXj2oSzwg6G0iBjKg33joMQ	1	true
UCH2VZQBLFTOp6I_qgnBJCuQ	UCFbx6QBTcDI6toOnO-EyajQ	1	true
UCH2VZQBLFTOp6I_qgnBJCuQ	UCdGpd0gNn38UKwoncZd9rmA	2	true
UCH2VZQBLFTOp6I_qgnBJCuQ	UCOX1xjMcnZVmV-yx0VC6Fvg	1	true
UCH2VZQBLFTOp6I_qgnBJCuQ	UC2oZNzo6o37qejkFQE2dIAA	1	true
UCH2VZQBLFTOp6I_qgnBJCuQ	UCbxeWUKWro8bMscsa36-BtA	1	true
UCH2VZQBLFTOp6I_qgnBJCuQ	UCTe18hXXnFNL7FDdnVfIqEQ	2	true
UCH2VZQBLFTOp6I_qgnBJCuQ	UCyE4KeQg54Bx34LxQB22xkw	1	true
UCH2VZQBLFTOp6I_qgnBJCuQ	UCe1XNXkGImWSq5n4wkzNjBw	1	true
UCH2VZQBLFTOp6I_qgnBJCuQ	UCpwFulVhWRsS92nYOTdh-uw	2	true
UCH2VZQBLFTOp6I_qgnBJCuQ	UCgheXPYps0uCdB60AvUQYbg	2	true
UCH2VZQBLFTOp6I_qgnBJCuQ	UCWijW6tW0iI5ghsAbWDFtTg	7	true
UCH2VZQBLFTOp6I_qgnBJCuQ	UCyG6SY3s8fS7ZKje6lv1JKg	4	true
UCH2VZQBLFTOp6I_qgnBJCuQ	UCwumfjrPgLl0H2wS7juY5Xw	1	true
UCH2VZQBLFTOp6I_qgnBJCuQ	UCKXlbJbeAb8uTdRHJhlwE1g	3	true
UCH2VZQBLFTOp6I_qgnBJCuQ	UCYALxwppPJjYyTMEwwEcNCQ	1	true
UCH2VZQBLFTOp6I_qgnBJCuQ	UCT4jm6o-mUMuo1bKHcHSIfA	4	true
UCH2VZQBLFTOp6I_qgnBJCuQ	UCz1xVDltULzUhZCJ1TkvnTQ	1	true
UCBx_CluVFNvy0TXsmNBZ-ow	UCBx_CluVFNvy0TXsmNBZ-ow	27	true
UCBx_CluVFNvy0TXsmNBZ-ow	UC8IbAhPglJ1OeC44A_Gtmqg	2	true
UCBx_CluVFNvy0TXsmNBZ-ow	UCvNbTU5NSQ_K8cWfY9OmWsw	2	true
UCBx_CluVFNvy0TXsmNBZ-ow	UC_vFhB8UkkdeiOOOZTeXG7A	1	true
UCBx_CluVFNvy0TXsmNBZ-ow	UC_er6_R1PKUCxc7QSXxIvzw	2	true
UCBx_CluVFNvy0TXsmNBZ-ow	UCuiLR4p6wQ3xLEm15pEn1Xw	2	true
UCBx_CluVFNvy0TXsmNBZ-ow	UCmpHPgeCBgvk_fDXZQKsnAA	3	true
UCBx_CluVFNvy0TXsmNBZ-ow	UCMYTIyqS1-7wT-3pBB8bR5A	3	true
UCBx_CluVFNvy0TXsmNBZ-ow	UCD9kk0EUEtflrRl6TV0lDyA	2	true
UCBx_CluVFNvy0TXsmNBZ-ow	UCqyvYqXCsDtgMUGHEsG6ERA	1	true
UCBx_CluVFNvy0TXsmNBZ-ow	UC9zqTTVeClpqMQ5CLuJdWtw	5	true
UCBx_CluVFNvy0TXsmNBZ-ow	UCDtVoSwSwQgwhcC89Nlz5Vg	3	true
UCBx_CluVFNvy0TXsmNBZ-ow	UChHd-MU2mOvZHmBQz6zJw_w	3	true
UCBx_CluVFNvy0TXsmNBZ-ow	UCskf1Ks-24BGZctXlN6QYwA	1	true
UCBx_CluVFNvy0TXsmNBZ-ow	UCNjPniJ9bZuCDQXCRqNsCBQ	1	true
UCBx_CluVFNvy0TXsmNBZ-ow	UCSv9d0kQegylHWpP83jWSQg	3	true
UCBx_CluVFNvy0TXsmNBZ-ow	UCI2EhvTADDdOex2nBIRsigw	1	true
UCBx_CluVFNvy0TXsmNBZ-ow	UCGfBE94turq_hyKMxB-Dfrg	1	true
UCBx_CluVFNvy0TXsmNBZ-ow	UCN-opsqqDunWO6h5uCp9Y4g	4	true
UCBx_CluVFNvy0TXsmNBZ-ow	UCORRcj9wv5DEYCEg2LhBcLQ	1	true
UCBx_CluVFNvy0TXsmNBZ-ow	UCkke64Kird1ZcZsPJEo_hYg	2	true
UCBx_CluVFNvy0TXsmNBZ-ow	UCv2svvDbMNunUuPs8hUUKVA	1	true
UCBx_CluVFNvy0TXsmNBZ-ow	UC0Q3GfF9amdyyjTA9DpTnyw	1	true
UCBx_CluVFNvy0TXsmNBZ-ow	UCxucJ9P3mLMneYypLZYn2uw	2	true
UCBx_CluVFNvy0TXsmNBZ-ow	UCqZN-NqgP7bhbctbyThSVUA	1	true
UCBx_CluVFNvy0TXsmNBZ-ow	UC12zKGLhMhDeDidoctM6BrA	4	true
UCBx_CluVFNvy0TXsmNBZ-ow	UCKtJs_zI1yzswHDWqkqHtWw	2	true
UCBx_CluVFNvy0TXsmNBZ-ow	UC1RnMyP-HfZCyMLX0TmyMTg	1	true
UCBx_CluVFNvy0TXsmNBZ-ow	UCoa-D_VfMkFrCYodrOC9-mA	1	true
UCBx_CluVFNvy0TXsmNBZ-ow	UCjaWLFTNqLkq3ZY2BJ4NYRg	5	true
UCBx_CluVFNvy0TXsmNBZ-ow	UCrh3PVCJvakmb7t6_XhPLcQ	1	true
UCBx_CluVFNvy0TXsmNBZ-ow	UCL41BsrnhsSSXG4zYwqC95g	1	true
UCBx_CluVFNvy0TXsmNBZ-ow	UCVrKQMmA2ew9LFzeIDaOFgw	1	true
UCBx_CluVFNvy0TXsmNBZ-ow	UCwVmZjJwkCUCOes5_eAIebg	1	true
UCBx_CluVFNvy0TXsmNBZ-ow	UC9gmqJKNBOyCl2KLdJIv0mQ	1	true
UCBx_CluVFNvy0TXsmNBZ-ow	UCXLe20604d4XVV_Z6cQc-gg	2	true
UCBx_CluVFNvy0TXsmNBZ-ow	UCDo7hEeMTMHLJxRu5fnbXKg	1	true
UCBx_CluVFNvy0TXsmNBZ-ow	UCm-XT_NupkfP-19ZE8QJACA	1	true
UCBx_CluVFNvy0TXsmNBZ-ow	UCP391YRAjSOdM_bwievgaZA	7	true
UCBx_CluVFNvy0TXsmNBZ-ow	UCq8ChnGCYMVCzDgGMK9e91A	1	true
UCBx_CluVFNvy0TXsmNBZ-ow	UCBiZg7ojHPU8ShY7s8xQ6bg	1	true
UCBx_CluVFNvy0TXsmNBZ-ow	UCNl_i-ggJbZNyOLlhE7yyhw	2	true
UCBx_CluVFNvy0TXsmNBZ-ow	UC19aAr6UojQesIVCBsXJGIw	1	true
UCBx_CluVFNvy0TXsmNBZ-ow	UCPU9R4M0Fruz-E2Vo9KEmAQ	1	true
UCBx_CluVFNvy0TXsmNBZ-ow	UCsRfBAspa72ExrsN347W2xg	3	true
UCBx_CluVFNvy0TXsmNBZ-ow	UCLWEHMfQsBVlIEQicwXtb1w	1	true
UCBx_CluVFNvy0TXsmNBZ-ow	UCsQbqbLY-uvbXSCXinr5imA	1	true
UCBx_CluVFNvy0TXsmNBZ-ow	UCuAaB8lLRmoZzOrc_d_Ka0A	1	true
UCBx_CluVFNvy0TXsmNBZ-ow	UCCIQoWSB2N80fU7x5ga3Biw	1	true
UCBx_CluVFNvy0TXsmNBZ-ow	UCOX1xjMcnZVmV-yx0VC6Fvg	1	true
UCBx_CluVFNvy0TXsmNBZ-ow	UCvi6qsQ6iqHWDph-ckhX5GQ	1	true
UCBx_CluVFNvy0TXsmNBZ-ow	UC_rnNJR_cCfi_p-UMjtf85Q	1	true
UCBx_CluVFNvy0TXsmNBZ-ow	UCQ8Rk_c5tzYeiTzXH3nrqyQ	1	true
UCBx_CluVFNvy0TXsmNBZ-ow	UCr9Jv4BCx_EZ3-RiuYwQXqg	1	true
UCBx_CluVFNvy0TXsmNBZ-ow	UCWX70TFNwDsBLYlRzOe_-zw	1	true
UCBx_CluVFNvy0TXsmNBZ-ow	UCcu3pbQumWatGNPvV_2RyPw	1	true
UCBx_CluVFNvy0TXsmNBZ-ow	UC0Uzow4iFA8PoIKE_U2rmeg	1	true
UCBx_CluVFNvy0TXsmNBZ-ow	UCQz-h9kq50OxKmU2yGoOWlg	1	true
UCBx_CluVFNvy0TXsmNBZ-ow	UCN9eb1Z__4hietbXmwxOglw	2	true
UCVqS-HRwe2vq_Jjgu4fg-UA	UCP-Vg2PcmLiWpEdvMI1R35w	1	true
UCVqS-HRwe2vq_Jjgu4fg-UA	UCVqS-HRwe2vq_Jjgu4fg-UA	605	true
UCVqS-HRwe2vq_Jjgu4fg-UA	UCA2llkURdTm63bBB3nTBw1w	2	true
UCVqS-HRwe2vq_Jjgu4fg-UA	UCgDb_6JF3elI2CFR9SqSbwA	2	true
UCVqS-HRwe2vq_Jjgu4fg-UA	UC42k7FI53tnSSIjgzW-rbLA	4	true
UCVqS-HRwe2vq_Jjgu4fg-UA	UCA1nC2t2zfzBOySscmpIzGQ	4	true
UCVqS-HRwe2vq_Jjgu4fg-UA	UC5eWe0ULMB-T72sAL5ybArg	2	true
UCVqS-HRwe2vq_Jjgu4fg-UA	UCFiEI1kDHlO9UQtxx0wj-XA	1	true
UCVqS-HRwe2vq_Jjgu4fg-UA	UC81fUuO3oGR-ju7tEAuyNPA	2	true
UCVqS-HRwe2vq_Jjgu4fg-UA	UCFbx6QBTcDI6toOnO-EyajQ	6	true
UCVqS-HRwe2vq_Jjgu4fg-UA	UCfIlLA5vyrS8PgzSOKE2GBw	22	true
UCVqS-HRwe2vq_Jjgu4fg-UA	UC33LTYvNoNvpx7D5qezhxew	1	true
UCVqS-HRwe2vq_Jjgu4fg-UA	UCPCwZ6sP0cAwgMsGZ23rOYA	2	true
UCVqS-HRwe2vq_Jjgu4fg-UA	UCgfgPyU5Vc4s1tyBSM6CCvw	1	true
UCVqS-HRwe2vq_Jjgu4fg-UA	UCujBU_iFv79ae1QxiBbQkPg	1	true
UCVqS-HRwe2vq_Jjgu4fg-UA	UCPGGSQfN8LREy6dWdk85fpw	4	true
UCVqS-HRwe2vq_Jjgu4fg-UA	UCz1xVDltULzUhZCJ1TkvnTQ	1	true
UCVqS-HRwe2vq_Jjgu4fg-UA	UCuAaB8lLRmoZzOrc_d_Ka0A	1	true
UCVqS-HRwe2vq_Jjgu4fg-UA	UCbhT_vtlwr7X2wG6q_0mWVQ	2	true
UCVqS-HRwe2vq_Jjgu4fg-UA	UClGVPnkZ62SuUbE4EqTDIYg	4	true
UCVqS-HRwe2vq_Jjgu4fg-UA	UCLS-udF3quRKFcnQTpjmrRw	1	true
UCVqS-HRwe2vq_Jjgu4fg-UA	UCHyeOQ0-Td0Dv3xfI0dwu3g	1	true
UCVqS-HRwe2vq_Jjgu4fg-UA	UC3lP5c55UE0ozG-uN0uBsXg	2	true
UCVqS-HRwe2vq_Jjgu4fg-UA	UCuFi5ZBiy2IgvwVRRhsazQA	1	true
UCVqS-HRwe2vq_Jjgu4fg-UA	UCcpEuvf0WL27bLso2tK1DLQ	1	true
UCVqS-HRwe2vq_Jjgu4fg-UA	UCMMJm4lYxEh7GM4loYh6-SQ	1	true
UCVqS-HRwe2vq_Jjgu4fg-UA	UClN6OLbLp1YjTSwDOkEM2dA	20	true
UCVqS-HRwe2vq_Jjgu4fg-UA	UC4_WOkaSB6TMFad-v0T6qmg	3	true
UCVqS-HRwe2vq_Jjgu4fg-UA	UC9Xzfea9PyVFl_jmbKVuxAg	1	true
UCVqS-HRwe2vq_Jjgu4fg-UA	UCewz-5dLWu_rswIMStBBI1Q	1	true
UCVqS-HRwe2vq_Jjgu4fg-UA	UCzDQaYfHMJrXfw46whk6hIg	3	true
UCVqS-HRwe2vq_Jjgu4fg-UA	UCAcm_kK9LeKsqntNX_5J9Rg	1	true
UCVqS-HRwe2vq_Jjgu4fg-UA	UCvLNnnIZdqXYqAS-l8FLJFw	1	true
UCVqS-HRwe2vq_Jjgu4fg-UA	UCZMequcevIbkS-_LLAizS1w	1	true
UCVqS-HRwe2vq_Jjgu4fg-UA	UCoPDcjdXmHCFyW7Pz9DBCOQ	1	true
UCVqS-HRwe2vq_Jjgu4fg-UA	UCdKg0aioEqn_tbfBGz_ltFw	2	true
UCVqS-HRwe2vq_Jjgu4fg-UA	UC4F32QLrpDmmRrozxr9z59g	26	true
UCtym0q5w1NeYqVjzSwRntgQ	UCmQK52xYtdeg7EYiQhqEeZA	1	true
UCtym0q5w1NeYqVjzSwRntgQ	UCFiEI1kDHlO9UQtxx0wj-XA	2	true
UCtym0q5w1NeYqVjzSwRntgQ	UCwobzUc3z-0PrFpoRxNszXQ	1	true
UCtym0q5w1NeYqVjzSwRntgQ	UC65fQy9R2Ni5npZtbotAIRw	1	true
UCtym0q5w1NeYqVjzSwRntgQ	UCG-eghyORxNrzSG8FkAWKyw	1	true
UCtym0q5w1NeYqVjzSwRntgQ	UCnyFZr3wJBAJRjcqr_Q5Gug	1	true
UCtym0q5w1NeYqVjzSwRntgQ	UCFbx6QBTcDI6toOnO-EyajQ	2	true
UCtym0q5w1NeYqVjzSwRntgQ	UCC1_Drela_P4MAW8pPcdjSw	1	true
UCtym0q5w1NeYqVjzSwRntgQ	UC8Ciiz3QHgziGJXa4BPY7sQ	1	true
UCtym0q5w1NeYqVjzSwRntgQ	UC0Q3GfF9amdyyjTA9DpTnyw	1	true
UCtym0q5w1NeYqVjzSwRntgQ	UCXdXYG8dUmEv6jhEji_lSHg	1	true
UCtym0q5w1NeYqVjzSwRntgQ	UCSFQIz7KvEWSwuCCh_zh_0Q	1	true
UCtym0q5w1NeYqVjzSwRntgQ	UCY3bccBm-_J8m0-SQz2AbAg	1	true
UCtym0q5w1NeYqVjzSwRntgQ	UCIQPHl1WKKTt9KkWyo_JNig	1	true
UCtym0q5w1NeYqVjzSwRntgQ	UCeoHCxOOPTeT9Pp_qi8HmHg	1	true
UCtym0q5w1NeYqVjzSwRntgQ	UCXj2oSzwg6G0iBjKg33joMQ	1	true
UCtym0q5w1NeYqVjzSwRntgQ	UCEKBa8byszeoA0f7lt1ledg	1	true
UCtym0q5w1NeYqVjzSwRntgQ	UCCUJDced0JrM5EmfdnhuRJw	1	true
UCtym0q5w1NeYqVjzSwRntgQ	UC3O9y5JRSBqn4YhCEvBys_Q	2	true
UCtym0q5w1NeYqVjzSwRntgQ	UCuAaB8lLRmoZzOrc_d_Ka0A	1	true
UCtym0q5w1NeYqVjzSwRntgQ	UC1VlEIPGhDqaUsL7Vg__hHA	1	true
UCtym0q5w1NeYqVjzSwRntgQ	UCg3fYev0mdtUvJvFJpQUM8g	1	true
UCtym0q5w1NeYqVjzSwRntgQ	UCR9EXU15wObpFMDyQmHXeuw	1	true
UCtym0q5w1NeYqVjzSwRntgQ	UClu474HMt895mVxZdlIHXEA	1	true
UCtym0q5w1NeYqVjzSwRntgQ	UCIR0R7T5KX7jK0EWxgLtndg	1	true
UCtym0q5w1NeYqVjzSwRntgQ	UC12zKGLhMhDeDidoctM6BrA	1	true
UCtym0q5w1NeYqVjzSwRntgQ	UCcoPc-BqFPkVkkwyS35J-ng	1	true
UCtym0q5w1NeYqVjzSwRntgQ	UCdKJlY5eAoSumIlcOcYxIGg	2	true
UCtym0q5w1NeYqVjzSwRntgQ	UCuSEQ1Ebc3lS5FrwGKpbtkA	1	true
UCtym0q5w1NeYqVjzSwRntgQ	UCcnuou4Sjm-qF87yzWve1ug	1	true
UCtym0q5w1NeYqVjzSwRntgQ	UCeGhoo58OOV262hAkG2eBnQ	1	true
UCtym0q5w1NeYqVjzSwRntgQ	UCo9oJoBqutAtWI5Jb-_EQWQ	1	true
UCtym0q5w1NeYqVjzSwRntgQ	UCeDX3cRwyEND1InTK4Iod2g	1	true
UCtym0q5w1NeYqVjzSwRntgQ	UCGm27Ndv8a-0yUJFVpRwkDQ	1	true
UCtym0q5w1NeYqVjzSwRntgQ	UCUavbFpmwM4WovWqgf0_B4g	1	true
UCtym0q5w1NeYqVjzSwRntgQ	UCl4jPGdW6YDo-1KgU5q8T1g	1	true
UCtym0q5w1NeYqVjzSwRntgQ	UCfEQnRUpLwlf85pcXBukT_A	1	true
UCtym0q5w1NeYqVjzSwRntgQ	UC3Ooj_iDWELBumIEDejyNHQ	1	true
UCtym0q5w1NeYqVjzSwRntgQ	UCa1o8yRux22rDwRbEjokSPg	1	true
UCtym0q5w1NeYqVjzSwRntgQ	UCWq1xltHB2fDe6YkYoOrryg	1	true
UCtym0q5w1NeYqVjzSwRntgQ	UCNy6EtpfR05_vGNPkb-xQBA	1	true
UCtym0q5w1NeYqVjzSwRntgQ	UCjleHngOtF8tgqXXRhQucCA	1	true
UCtym0q5w1NeYqVjzSwRntgQ	UCsgHWN8lYveMUEWTDheTjZA	1	true
UCtym0q5w1NeYqVjzSwRntgQ	UC-RhfF4_tepYCgSZuGLSzpw	1	true
UCtym0q5w1NeYqVjzSwRntgQ	UCwQhAc44SfDvhdCQiHluBVQ	1	true
UCtym0q5w1NeYqVjzSwRntgQ	UCemIxU4HzIhVLeohT7eUUoA	1	true
UCgbbjw8zPkrmmL_XU1SgJBg	UCW4t6ozY9VDVeN_GHK260BQ	3	true
UCgbbjw8zPkrmmL_XU1SgJBg	UC4zG6UeNUn-HM6UEFFkiESA	3	true
UCgbbjw8zPkrmmL_XU1SgJBg	UCgbbjw8zPkrmmL_XU1SgJBg	133	true
UCgbbjw8zPkrmmL_XU1SgJBg	UCG-eghyORxNrzSG8FkAWKyw	5	true
UCgbbjw8zPkrmmL_XU1SgJBg	UC5Bh3Ljo71O9uML6paQVAfQ	1	true
UCgbbjw8zPkrmmL_XU1SgJBg	UCB0zinWfy-dS_NqcOINYo3A	1	true
UCgbbjw8zPkrmmL_XU1SgJBg	UC9zqTTVeClpqMQ5CLuJdWtw	6	true
UCgbbjw8zPkrmmL_XU1SgJBg	UC8IbAhPglJ1OeC44A_Gtmqg	4	true
UCgbbjw8zPkrmmL_XU1SgJBg	UCxt_nr6Xwbq4O2Ur9ZBpgAA	1	true
UCgbbjw8zPkrmmL_XU1SgJBg	UCFbx6QBTcDI6toOnO-EyajQ	6	true
UCgbbjw8zPkrmmL_XU1SgJBg	UCuAaB8lLRmoZzOrc_d_Ka0A	1	true
UCgbbjw8zPkrmmL_XU1SgJBg	UCe1XNXkGImWSq5n4wkzNjBw	3	true
UCgbbjw8zPkrmmL_XU1SgJBg	UCXj2oSzwg6G0iBjKg33joMQ	2	true
UCgbbjw8zPkrmmL_XU1SgJBg	UCHyeOQ0-Td0Dv3xfI0dwu3g	1	true
UCgbbjw8zPkrmmL_XU1SgJBg	UCPR3gVNYBzi-02_O4noC1Zg	2	true
UCgbbjw8zPkrmmL_XU1SgJBg	UCN-opsqqDunWO6h5uCp9Y4g	1	true
UCgbbjw8zPkrmmL_XU1SgJBg	UCKtJs_zI1yzswHDWqkqHtWw	1	true
UCgbbjw8zPkrmmL_XU1SgJBg	UCDbSk1EuJeXL2sCis8cvo-g	2	true
UCgbbjw8zPkrmmL_XU1SgJBg	UCMYTIyqS1-7wT-3pBB8bR5A	1	true
UCgbbjw8zPkrmmL_XU1SgJBg	UCMMJm4lYxEh7GM4loYh6-SQ	1	true
UCgbbjw8zPkrmmL_XU1SgJBg	UCGILPX9AE6hZpqp1FjFn6pw	2	true
UCgbbjw8zPkrmmL_XU1SgJBg	UCQbKXPyFsK-j0haJE0PGvhA	1	true
UCgbbjw8zPkrmmL_XU1SgJBg	UCq8ChnGCYMVCzDgGMK9e91A	3	true
UCgbbjw8zPkrmmL_XU1SgJBg	UCGfBE94turq_hyKMxB-Dfrg	1	true
UCgbbjw8zPkrmmL_XU1SgJBg	UChHd-MU2mOvZHmBQz6zJw_w	1	true
UCgbbjw8zPkrmmL_XU1SgJBg	UCP391YRAjSOdM_bwievgaZA	1	true
UCgbbjw8zPkrmmL_XU1SgJBg	UCH2VZQBLFTOp6I_qgnBJCuQ	1	true
UCgbbjw8zPkrmmL_XU1SgJBg	UC3Ooj_iDWELBumIEDejyNHQ	1	true
UCgbbjw8zPkrmmL_XU1SgJBg	UCjVPaRkoIgq_Whb1QkJjGKg	1	true
UCgbbjw8zPkrmmL_XU1SgJBg	UCf9lX9Vc4CWBUKQxVfZ6MtQ	1	true
UCgbbjw8zPkrmmL_XU1SgJBg	UCa1o8yRux22rDwRbEjokSPg	1	true
UCgbbjw8zPkrmmL_XU1SgJBg	UCdKJlY5eAoSumIlcOcYxIGg	1	true
UCgbbjw8zPkrmmL_XU1SgJBg	UCuiLR4p6wQ3xLEm15pEn1Xw	2	true
UCgbbjw8zPkrmmL_XU1SgJBg	UC12zKGLhMhDeDidoctM6BrA	5	true
UCgbbjw8zPkrmmL_XU1SgJBg	UCz1xVDltULzUhZCJ1TkvnTQ	5	true
UCgbbjw8zPkrmmL_XU1SgJBg	UC3UMFl4FxufRp6YErllpxHQ	1	true
UCgbbjw8zPkrmmL_XU1SgJBg	UCecR2Q4C3RJxAr7joOKNxww	1	true
UCgbbjw8zPkrmmL_XU1SgJBg	UC42k7FI53tnSSIjgzW-rbLA	1	true
UCgbbjw8zPkrmmL_XU1SgJBg	UCZ4wREznHPRuUz-ghmp7KGw	1	true
UCgbbjw8zPkrmmL_XU1SgJBg	UCwQhAc44SfDvhdCQiHluBVQ	3	true
UCgbbjw8zPkrmmL_XU1SgJBg	UC4F32QLrpDmmRrozxr9z59g	2	true
UCgbbjw8zPkrmmL_XU1SgJBg	UC5hGM-gAk5I8zmn8xUKuNkw	1	true
UCgbbjw8zPkrmmL_XU1SgJBg	UCnNvQI_yyWPZGI-rqFhR17Q	1	true
UCgbbjw8zPkrmmL_XU1SgJBg	UCWq1xltHB2fDe6YkYoOrryg	3	true
UCgbbjw8zPkrmmL_XU1SgJBg	UCsCeWWW8sk8zDaPzw6Ll67g	1	true
UCgbbjw8zPkrmmL_XU1SgJBg	UChXNyp6dL_aY_3qwVgDd-EQ	1	true
UCgbbjw8zPkrmmL_XU1SgJBg	UCz84Tivi_d214XXnxGbtKHQ	1	true
UCgbbjw8zPkrmmL_XU1SgJBg	UCvLNnnIZdqXYqAS-l8FLJFw	1	true
UCgbbjw8zPkrmmL_XU1SgJBg	UCrrnW1mAQosrbtRrFjZ31wg	1	true
UCgbbjw8zPkrmmL_XU1SgJBg	UC1_-z9fMYofIUQWYUPoNyTw	1	true
UCgbbjw8zPkrmmL_XU1SgJBg	UCDoPuIvx88nh69fS5VJCNWg	1	true
UCgbbjw8zPkrmmL_XU1SgJBg	UC3vZWDAhX5356m17Vy1B2GA	1	true
UCnNvQI_yyWPZGI-rqFhR17Q	UCuAaB8lLRmoZzOrc_d_Ka0A	2	true
UCnNvQI_yyWPZGI-rqFhR17Q	UCG-eghyORxNrzSG8FkAWKyw	2	true
UCnNvQI_yyWPZGI-rqFhR17Q	UC9zqTTVeClpqMQ5CLuJdWtw	1	true
UCnNvQI_yyWPZGI-rqFhR17Q	UC42k7FI53tnSSIjgzW-rbLA	1	true
UCnNvQI_yyWPZGI-rqFhR17Q	UCjaWLFTNqLkq3ZY2BJ4NYRg	1	true
UCnNvQI_yyWPZGI-rqFhR17Q	UCIQPHl1WKKTt9KkWyo_JNig	8	true
UCnNvQI_yyWPZGI-rqFhR17Q	UCx7HKmnCIIbRBF2FjAoV0bg	1	true
UCnNvQI_yyWPZGI-rqFhR17Q	UCHyeOQ0-Td0Dv3xfI0dwu3g	1	true
UCnNvQI_yyWPZGI-rqFhR17Q	UCMYTIyqS1-7wT-3pBB8bR5A	1	true
UCnNvQI_yyWPZGI-rqFhR17Q	UCz1xVDltULzUhZCJ1TkvnTQ	2	true
UCnNvQI_yyWPZGI-rqFhR17Q	UCB0zinWfy-dS_NqcOINYo3A	1	true
UCnNvQI_yyWPZGI-rqFhR17Q	UC3lP5c55UE0ozG-uN0uBsXg	1	true
UCnNvQI_yyWPZGI-rqFhR17Q	UCEWHPFNilsT0IfQfutVzsag	1	true
UCnNvQI_yyWPZGI-rqFhR17Q	UCT0ECF7TihWahDqpU2i9tQA	1	true
UCnNvQI_yyWPZGI-rqFhR17Q	UCiW6oCC0c_705F_BOWOVUKg	1	true
UCnNvQI_yyWPZGI-rqFhR17Q	UC3PLVO-mt6ZQLiySKdJedCA	1	true
UCnNvQI_yyWPZGI-rqFhR17Q	UCGILPX9AE6hZpqp1FjFn6pw	1	true
UCnNvQI_yyWPZGI-rqFhR17Q	UCV9EVCVbJus_StqIJ89ajLA	1	true
UCnNvQI_yyWPZGI-rqFhR17Q	UC1VlEIPGhDqaUsL7Vg__hHA	1	true
UCnNvQI_yyWPZGI-rqFhR17Q	UCP391YRAjSOdM_bwievgaZA	2	true
UCnNvQI_yyWPZGI-rqFhR17Q	UC3Ooj_iDWELBumIEDejyNHQ	1	true
UCnNvQI_yyWPZGI-rqFhR17Q	UC6nYtmaMh43WUQW5YeopuNg	1	true
UCnNvQI_yyWPZGI-rqFhR17Q	UCV306eHqgo0LvBf3Mh36AHg	1	true
UCnNvQI_yyWPZGI-rqFhR17Q	UCMMJm4lYxEh7GM4loYh6-SQ	1	true
UCnNvQI_yyWPZGI-rqFhR17Q	UCnNvQI_yyWPZGI-rqFhR17Q	60	true
UCnNvQI_yyWPZGI-rqFhR17Q	UCH2VZQBLFTOp6I_qgnBJCuQ	1	true
UCnNvQI_yyWPZGI-rqFhR17Q	UCJIKKHplhnzcDmpztqUO7nA	1	true
UCnNvQI_yyWPZGI-rqFhR17Q	UCgbbjw8zPkrmmL_XU1SgJBg	1	true
UCnNvQI_yyWPZGI-rqFhR17Q	UCTFCMkTZPwi_PjerXYxDscA	1	true
UCnNvQI_yyWPZGI-rqFhR17Q	UCQq1CfzTvBRn3l4CYswnMcw	1	true
UCnNvQI_yyWPZGI-rqFhR17Q	UC4_WOkaSB6TMFad-v0T6qmg	1	true
UCnNvQI_yyWPZGI-rqFhR17Q	UCsYo9r-JIEkhoRoc9G5gdpQ	1	true
UCnNvQI_yyWPZGI-rqFhR17Q	UCqZN-NqgP7bhbctbyThSVUA	1	true
UCnNvQI_yyWPZGI-rqFhR17Q	UCrSM1UV_KLAdTzgxyxl3POw	1	true
UCnNvQI_yyWPZGI-rqFhR17Q	UCyuDCBA1ig-x1YeAQBX2b4g	1	true
UCnNvQI_yyWPZGI-rqFhR17Q	UC5ZXYxeWlROKbL7JziJ0bIQ	1	true
UCnNvQI_yyWPZGI-rqFhR17Q	UCmV27tf2iqUZDDtXiShSKUg	1	true
UCnNvQI_yyWPZGI-rqFhR17Q	UCFPV1zBY8TVYEnjMesCf17Q	1	true
UCnNvQI_yyWPZGI-rqFhR17Q	UCjrmFzNfoXO-We5rT6jB4vg	1	true
UCnNvQI_yyWPZGI-rqFhR17Q	UCemIxU4HzIhVLeohT7eUUoA	1	true
UCnNvQI_yyWPZGI-rqFhR17Q	UC9fxSdFjcz5QWDEhYCk_k1w	1	true
UCnNvQI_yyWPZGI-rqFhR17Q	UCXTI4ER3d0UPT4WxFYI082w	1	true
UCnNvQI_yyWPZGI-rqFhR17Q	UCWq1xltHB2fDe6YkYoOrryg	1	true
UCnNvQI_yyWPZGI-rqFhR17Q	UCWX70TFNwDsBLYlRzOe_-zw	1	true
UCnNvQI_yyWPZGI-rqFhR17Q	UC5o3Raq_jrrSFZ5rkC8uBvw	1	true
UCnNvQI_yyWPZGI-rqFhR17Q	UC2mdv67uDPQO35IYkzK_Xzw	1	true
UCnNvQI_yyWPZGI-rqFhR17Q	UCT3P3oWIt21UsHi_wwDG8Yg	1	true
UCnNvQI_yyWPZGI-rqFhR17Q	UCJS-Vcf3aR_vEX5F7oPIqnA	1	true
UCnNvQI_yyWPZGI-rqFhR17Q	UCOqOdxzU58qOGoysdnVXd9Q	1	true
UCnNvQI_yyWPZGI-rqFhR17Q	UCe1XNXkGImWSq5n4wkzNjBw	1	true
UCnNvQI_yyWPZGI-rqFhR17Q	UCwVmZjJwkCUCOes5_eAIebg	1	true
UCnNvQI_yyWPZGI-rqFhR17Q	UCvLNnnIZdqXYqAS-l8FLJFw	1	true
UCnNvQI_yyWPZGI-rqFhR17Q	UC1_-z9fMYofIUQWYUPoNyTw	1	true
UCnNvQI_yyWPZGI-rqFhR17Q	UC0bD2v2yi9WoiupiOMV951Q	1	true
UC9fxSdFjcz5QWDEhYCk_k1w	UC4zG6UeNUn-HM6UEFFkiESA	2	true
UC9fxSdFjcz5QWDEhYCk_k1w	UC9fxSdFjcz5QWDEhYCk_k1w	565	true
UC9fxSdFjcz5QWDEhYCk_k1w	UC9zqTTVeClpqMQ5CLuJdWtw	3	true
UC9fxSdFjcz5QWDEhYCk_k1w	UCPR3gVNYBzi-02_O4noC1Zg	2	true
UC9fxSdFjcz5QWDEhYCk_k1w	UCKtJs_zI1yzswHDWqkqHtWw	1	true
UC9fxSdFjcz5QWDEhYCk_k1w	UC12zKGLhMhDeDidoctM6BrA	3	true
UC9fxSdFjcz5QWDEhYCk_k1w	UCLgti7NuK0RuW9wty-fxPjQ	1	true
UC9fxSdFjcz5QWDEhYCk_k1w	UC8IbAhPglJ1OeC44A_Gtmqg	2	true
UC9fxSdFjcz5QWDEhYCk_k1w	UC_53VGoH_0XLFmYVpGMvhvg	1	true
UC9fxSdFjcz5QWDEhYCk_k1w	UCXj2oSzwg6G0iBjKg33joMQ	1	true
UC9fxSdFjcz5QWDEhYCk_k1w	UCi2zMfox-UpFGAFfsMXqYfQ	1	true
UC9fxSdFjcz5QWDEhYCk_k1w	UC3O9y5JRSBqn4YhCEvBys_Q	1	true
UC9fxSdFjcz5QWDEhYCk_k1w	UClN6OLbLp1YjTSwDOkEM2dA	1	true
UC9fxSdFjcz5QWDEhYCk_k1w	UCA6Roeo-qFVk3jvjAdag7Uw	1	true
UC9fxSdFjcz5QWDEhYCk_k1w	UCQdOZmbeT9UoQy8G3zeNE-g	1	true
UC9fxSdFjcz5QWDEhYCk_k1w	UCxt_nr6Xwbq4O2Ur9ZBpgAA	1	true
UC9fxSdFjcz5QWDEhYCk_k1w	UCG-eghyORxNrzSG8FkAWKyw	1	true
UC9fxSdFjcz5QWDEhYCk_k1w	UCUp-GSUuNxSZ7cxOg7ZnyqA	1	true
UC9fxSdFjcz5QWDEhYCk_k1w	UCGfBE94turq_hyKMxB-Dfrg	1	true
UC9fxSdFjcz5QWDEhYCk_k1w	UCxucJ9P3mLMneYypLZYn2uw	1	true
UC9fxSdFjcz5QWDEhYCk_k1w	UCqZN-NqgP7bhbctbyThSVUA	2	true
UC9fxSdFjcz5QWDEhYCk_k1w	UCP391YRAjSOdM_bwievgaZA	1	true
UC9fxSdFjcz5QWDEhYCk_k1w	UCm17GAihi4NAVEnA1n4WajQ	1	true
UC9fxSdFjcz5QWDEhYCk_k1w	UCN-opsqqDunWO6h5uCp9Y4g	1	true
UC9fxSdFjcz5QWDEhYCk_k1w	UCHyeOQ0-Td0Dv3xfI0dwu3g	1	true
UC9fxSdFjcz5QWDEhYCk_k1w	UCuAaB8lLRmoZzOrc_d_Ka0A	1	true
UC9fxSdFjcz5QWDEhYCk_k1w	UCOX1xjMcnZVmV-yx0VC6Fvg	1	true
UC9fxSdFjcz5QWDEhYCk_k1w	UCPaL0Om2geEJyjncqTGm49A	1	true
UC9fxSdFjcz5QWDEhYCk_k1w	UCgbbjw8zPkrmmL_XU1SgJBg	1	true
UC9fxSdFjcz5QWDEhYCk_k1w	UCoU-1x87QJJA2mA9iQpWiUw	1	true
UC9fxSdFjcz5QWDEhYCk_k1w	UCORRcj9wv5DEYCEg2LhBcLQ	1	true
UC9fxSdFjcz5QWDEhYCk_k1w	UC0LDNBjI8prPXedEj3QosOQ	1	true
UC9fxSdFjcz5QWDEhYCk_k1w	UC5lg8zKcnJ1rnxR6lPgD1ug	1	true
UC9fxSdFjcz5QWDEhYCk_k1w	UCtzbjh-OJFkaHqSjvWJs87g	1	true
UC9fxSdFjcz5QWDEhYCk_k1w	UCZh5UuRs3JNPQvAcJ1UQQcQ	1	true
UC9fxSdFjcz5QWDEhYCk_k1w	UCMMJm4lYxEh7GM4loYh6-SQ	1	true
UC9fxSdFjcz5QWDEhYCk_k1w	UC3Ooj_iDWELBumIEDejyNHQ	1	true
UC9fxSdFjcz5QWDEhYCk_k1w	UCQKBmUf2GZUXRQFpzCPN5og	1	true
UC9fxSdFjcz5QWDEhYCk_k1w	UCLOJpGk3n2cACK7NzvmRGog	1	true
UC9fxSdFjcz5QWDEhYCk_k1w	UCwVmZjJwkCUCOes5_eAIebg	1	true
UC9fxSdFjcz5QWDEhYCk_k1w	UCxbqmMsXory_zC-kNqKHUgw	1	true
UC9fxSdFjcz5QWDEhYCk_k1w	UCuQ_uyOC8xbdo2M-jNZfM8A	1	true
UCvLNnnIZdqXYqAS-l8FLJFw	UCG-eghyORxNrzSG8FkAWKyw	1	true
UCvLNnnIZdqXYqAS-l8FLJFw	UCV6Ue4o5UIeKQ3IEkjnXRlg	1	true
UCvLNnnIZdqXYqAS-l8FLJFw	UCxt_nr6Xwbq4O2Ur9ZBpgAA	1	true
UCvLNnnIZdqXYqAS-l8FLJFw	UCWeDz9iYFe7APda1DFMHLtw	1	true
UCvLNnnIZdqXYqAS-l8FLJFw	UCmpHPgeCBgvk_fDXZQKsnAA	1	true
UCvLNnnIZdqXYqAS-l8FLJFw	UC1VlEIPGhDqaUsL7Vg__hHA	1	true
UCvLNnnIZdqXYqAS-l8FLJFw	UC12zKGLhMhDeDidoctM6BrA	3	true
UCvLNnnIZdqXYqAS-l8FLJFw	UCuAaB8lLRmoZzOrc_d_Ka0A	1	true
UCvLNnnIZdqXYqAS-l8FLJFw	UC0LDNBjI8prPXedEj3QosOQ	1	true
UCvLNnnIZdqXYqAS-l8FLJFw	UCrSM1UV_KLAdTzgxyxl3POw	1	true
UCvLNnnIZdqXYqAS-l8FLJFw	UCKtJs_zI1yzswHDWqkqHtWw	1	true
UCvLNnnIZdqXYqAS-l8FLJFw	UCZmc8QllMtE-fr51p1niyjw	1	true
UCvLNnnIZdqXYqAS-l8FLJFw	UCHyeOQ0-Td0Dv3xfI0dwu3g	1	true
UCvLNnnIZdqXYqAS-l8FLJFw	UCgbbjw8zPkrmmL_XU1SgJBg	2	true
UCvLNnnIZdqXYqAS-l8FLJFw	UCMYTIyqS1-7wT-3pBB8bR5A	2	true
UCvLNnnIZdqXYqAS-l8FLJFw	UCdnQnmMRKFOI6Q1H7awdMuQ	1	true
UCvLNnnIZdqXYqAS-l8FLJFw	UC9zqTTVeClpqMQ5CLuJdWtw	1	true
UCvLNnnIZdqXYqAS-l8FLJFw	UCPR3gVNYBzi-02_O4noC1Zg	3	true
UCvLNnnIZdqXYqAS-l8FLJFw	UCH2VZQBLFTOp6I_qgnBJCuQ	1	true
UCvLNnnIZdqXYqAS-l8FLJFw	UCP8XlGjPSGj8JkuZ8hgDAJw	1	true
UCvLNnnIZdqXYqAS-l8FLJFw	UCe1XNXkGImWSq5n4wkzNjBw	2	true
UCvLNnnIZdqXYqAS-l8FLJFw	UCuDagVc79VVXXPFJurgXIiw	1	true
UCvLNnnIZdqXYqAS-l8FLJFw	UCvLNnnIZdqXYqAS-l8FLJFw	5	true
UCvLNnnIZdqXYqAS-l8FLJFw	UCWq1xltHB2fDe6YkYoOrryg	2	true
UCvLNnnIZdqXYqAS-l8FLJFw	UCGfBE94turq_hyKMxB-Dfrg	1	true
UCvLNnnIZdqXYqAS-l8FLJFw	UCMMJm4lYxEh7GM4loYh6-SQ	1	true
UCvLNnnIZdqXYqAS-l8FLJFw	UCORRcj9wv5DEYCEg2LhBcLQ	1	true
UCvLNnnIZdqXYqAS-l8FLJFw	UCsdIGtyuyiW--cidQQ6KUsw	1	true
UCvLNnnIZdqXYqAS-l8FLJFw	UC3Ooj_iDWELBumIEDejyNHQ	1	true
UCvLNnnIZdqXYqAS-l8FLJFw	UC5Bh3Ljo71O9uML6paQVAfQ	1	true
UCvLNnnIZdqXYqAS-l8FLJFw	UC1_-z9fMYofIUQWYUPoNyTw	1	true
UCvLNnnIZdqXYqAS-l8FLJFw	UCamgdcs45ToPrIV7wmT7iYg	1	true
UCvLNnnIZdqXYqAS-l8FLJFw	UCTH-xd88WPq7KUjfzI9J1rg	1	true
UCvLNnnIZdqXYqAS-l8FLJFw	UCWX70TFNwDsBLYlRzOe_-zw	1	true
UCvLNnnIZdqXYqAS-l8FLJFw	UCU8Y4bqcr0unUI18EcVmo4Q	1	true
UCvLNnnIZdqXYqAS-l8FLJFw	UCmOqIaUBwlSK6lVGC2o46JA	1	true
UCvLNnnIZdqXYqAS-l8FLJFw	UCvsvFTlOWSFU_RBinLDU7Ow	1	true
UCvLNnnIZdqXYqAS-l8FLJFw	UCwQhAc44SfDvhdCQiHluBVQ	1	true
UCvLNnnIZdqXYqAS-l8FLJFw	UCphn4Z4L2dGNoh7jz_99EOA	1	true
UCvLNnnIZdqXYqAS-l8FLJFw	UCxm7PwK74oVJtyP0vN2qQIw	1	true
UCvLNnnIZdqXYqAS-l8FLJFw	UCxjXoEYzVFwvKD53-gvxhYQ	1	true
UCvLNnnIZdqXYqAS-l8FLJFw	UCnNvQI_yyWPZGI-rqFhR17Q	1	true
UCvLNnnIZdqXYqAS-l8FLJFw	UCoyhq57ClXRTd4h8vpiMelA	1	true
UCvLNnnIZdqXYqAS-l8FLJFw	UC2mdv67uDPQO35IYkzK_Xzw	1	true
UCvLNnnIZdqXYqAS-l8FLJFw	UCV32l4Xk6vXOemE60pZ41Sg	1	true
UCvLNnnIZdqXYqAS-l8FLJFw	UCfRVh-QaAzJ45hmNmlwT32g	1	true
UCvLNnnIZdqXYqAS-l8FLJFw	UChkPByjtZumJrJmtqkiw5Jg	1	true
UCvLNnnIZdqXYqAS-l8FLJFw	UCi3erzjE0p7H3CXsQNITzzA	1	true
UCvLNnnIZdqXYqAS-l8FLJFw	UCKwQfdV6NP-AAwbRtRJqwBg	1	true
UCvLNnnIZdqXYqAS-l8FLJFw	UC4F32QLrpDmmRrozxr9z59g	1	true
UCvLNnnIZdqXYqAS-l8FLJFw	UC0bD2v2yi9WoiupiOMV951Q	1	true
UCvLNnnIZdqXYqAS-l8FLJFw	UCIFYUiFUWCQzDc9nc6KY2Ig	1	true
UCvLNnnIZdqXYqAS-l8FLJFw	UC3vZWDAhX5356m17Vy1B2GA	1	true
UCf9lX9Vc4CWBUKQxVfZ6MtQ	UCf9lX9Vc4CWBUKQxVfZ6MtQ	82	true
UCf9lX9Vc4CWBUKQxVfZ6MtQ	UCoB_4Ec1pWpcf9mhyPfyvlw	1	true
UCf9lX9Vc4CWBUKQxVfZ6MtQ	UCW4t6ozY9VDVeN_GHK260BQ	1	true
UCf9lX9Vc4CWBUKQxVfZ6MtQ	UCUtDAMp91VCfHTZ9_ypKRPA	2	true
UCf9lX9Vc4CWBUKQxVfZ6MtQ	UCP-Vg2PcmLiWpEdvMI1R35w	4	true
UCf9lX9Vc4CWBUKQxVfZ6MtQ	UCFl00VTEDEA0cHCoMQ7CuZg	1	true
UCf9lX9Vc4CWBUKQxVfZ6MtQ	UC9zqTTVeClpqMQ5CLuJdWtw	5	true
UCf9lX9Vc4CWBUKQxVfZ6MtQ	UCuAaB8lLRmoZzOrc_d_Ka0A	12	true
UCf9lX9Vc4CWBUKQxVfZ6MtQ	UCghJZXv-Cg90zgdeTZCt_-A	4	true
UCf9lX9Vc4CWBUKQxVfZ6MtQ	UC2pQFYIrk5mg9x-LRM9TzYw	1	true
UCf9lX9Vc4CWBUKQxVfZ6MtQ	UCPR3gVNYBzi-02_O4noC1Zg	1	true
UCf9lX9Vc4CWBUKQxVfZ6MtQ	UCA2llkURdTm63bBB3nTBw1w	2	true
UCf9lX9Vc4CWBUKQxVfZ6MtQ	UCB0zinWfy-dS_NqcOINYo3A	1	true
UCf9lX9Vc4CWBUKQxVfZ6MtQ	UCtEEov46xWiYPdcJg-frWtg	1	true
UCf9lX9Vc4CWBUKQxVfZ6MtQ	UC3lP5c55UE0ozG-uN0uBsXg	8	true
UCf9lX9Vc4CWBUKQxVfZ6MtQ	UCk0U1Js-um2lRjSF3VoS_3A	1	true
UCf9lX9Vc4CWBUKQxVfZ6MtQ	UCH2VZQBLFTOp6I_qgnBJCuQ	2	true
UCf9lX9Vc4CWBUKQxVfZ6MtQ	UC42k7FI53tnSSIjgzW-rbLA	13	true
UCf9lX9Vc4CWBUKQxVfZ6MtQ	UCFbx6QBTcDI6toOnO-EyajQ	11	true
UCf9lX9Vc4CWBUKQxVfZ6MtQ	UCOFMoDHG-vKXs-f5vcG7JaQ	2	true
UCf9lX9Vc4CWBUKQxVfZ6MtQ	UCUw7hCgpimep4N_oEmG7G4g	1	true
UCf9lX9Vc4CWBUKQxVfZ6MtQ	UCCYxMTERB2LuzQPhsizT1cA	1	true
UCf9lX9Vc4CWBUKQxVfZ6MtQ	UCV5oxb6HtQR-ZptUGtnoPZA	1	true
UCf9lX9Vc4CWBUKQxVfZ6MtQ	UCz1xVDltULzUhZCJ1TkvnTQ	12	true
UCf9lX9Vc4CWBUKQxVfZ6MtQ	UCL5NH3xftKuwmPbDwkZ-RUw	3	true
UCf9lX9Vc4CWBUKQxVfZ6MtQ	UCGILPX9AE6hZpqp1FjFn6pw	3	true
UCf9lX9Vc4CWBUKQxVfZ6MtQ	UCHyeOQ0-Td0Dv3xfI0dwu3g	1	true
UCf9lX9Vc4CWBUKQxVfZ6MtQ	UCNCRt4-OOYn34DOyYLCFWtQ	1	true
UCf9lX9Vc4CWBUKQxVfZ6MtQ	UCXQHQFA87heyfElr-XajQPg	1	true
UCf9lX9Vc4CWBUKQxVfZ6MtQ	UCl01kak5i66hCdS_bCxkkgA	3	true
UCf9lX9Vc4CWBUKQxVfZ6MtQ	UCjFAEaZfULixCSOCIvY9qNw	1	true
UCf9lX9Vc4CWBUKQxVfZ6MtQ	UC5ACo310tjp353abzLc6sVQ	1	true
UCf9lX9Vc4CWBUKQxVfZ6MtQ	UCoi5cG7JL_kZ-LGW6-PtZ_w	5	true
UCf9lX9Vc4CWBUKQxVfZ6MtQ	UCJl_ERzQBci1wgg3UdM1bVQ	3	true
UCf9lX9Vc4CWBUKQxVfZ6MtQ	UCIOosFcrtBhEwlVeGcYSqiQ	1	true
UCf9lX9Vc4CWBUKQxVfZ6MtQ	UC1r7Gt4v-OD8domIE0Vw2Zg	2	true
UCf9lX9Vc4CWBUKQxVfZ6MtQ	UCbhT_vtlwr7X2wG6q_0mWVQ	1	true
UCf9lX9Vc4CWBUKQxVfZ6MtQ	UCTFCMkTZPwi_PjerXYxDscA	1	true
UCf9lX9Vc4CWBUKQxVfZ6MtQ	UCgbbjw8zPkrmmL_XU1SgJBg	1	true
UCf9lX9Vc4CWBUKQxVfZ6MtQ	UCJIKKHplhnzcDmpztqUO7nA	3	true
UCf9lX9Vc4CWBUKQxVfZ6MtQ	UCMMJm4lYxEh7GM4loYh6-SQ	1	true
UCf9lX9Vc4CWBUKQxVfZ6MtQ	UCebc-KBHO1FHPLC9HvTVZ3w	1	true
UCf9lX9Vc4CWBUKQxVfZ6MtQ	UCcoPc-BqFPkVkkwyS35J-ng	1	true
UCf9lX9Vc4CWBUKQxVfZ6MtQ	UC3Ooj_iDWELBumIEDejyNHQ	1	true
UCf9lX9Vc4CWBUKQxVfZ6MtQ	UC8p1vwvWtl6T73JiExfWs1g	1	true
UCf9lX9Vc4CWBUKQxVfZ6MtQ	UCJglPPxxQQtFg-78dIkRqNg	1	true
[truncated: 14,412 more rows]
