# Supplementary material
Source: publisher figshare collection journal article supplement (https://frontiersin.figshare.com/ndownloader/files/25261583)
Supplement: Supplementary file 5 [file 25261583 › yt_recommendation/data/02-machado_2020_sample/machado_2020-sample.ods]

## Sheet: machado_2020-triplicate_vacinaautismo_data
Id	Label	isseed	seedrank	publishedat	duration	channeltitle	channelid	videocategorylabel	viewcount	likecount	dislikecount	dislikelikeratio	favoritecount	commentcount	componentnumber	hasmisinformation	misinformationcode	brandad
CfhqdizHApM	Tomando vacina febre amarela. Escandalosa??!! Euuuuu??????	no		1491421826	00:03:14	Isabela Soares	UCrSYAKKH6gYD04KA-0ZkLAQ	Entertainment	11009801	63956	12334	0.192851	0		0	N		Gretel and Hansel; Happsy
nT9Z4VsMLTg	Dia de Vacina	no		1557014405	00:15:05	Tia Dani	UCR2IONXExRWEGxREw7lXHCQ	People & Blogs	6765178	46598	13786	0.29585	0		0	N		SparkMotion
vdD8IfWibQ0	TIPOS DE BEBÊS TOMANDO VACINA - VACINEI A DOUTORA	no		1480161675	00:10:05	Emilly Loise	UCQ1LWE9p0i3HxIpDZjiOKjg	Entertainment	6572438	35507	6274	0.176698	0		0	N		1thek; VIDI Toyota; Woolliment
VTG8o6TxOjk	EXPECTATIVA VS REALIDADE TOMANDO VACINA	no		1510084803	00:07:27	Gustavo TV	UCT0ECF7TihWahDqpU2i9tQA	Entertainment	2583229	31839	3978	0.124941	0		0	N		Maxi-Mag Moldova
jvNfyla1wHs	Campanha Nacional de Vacinação contra a Poliomielite e Sarampo (30 )	no		1533044859	00:00:30	Ministério da Saúde	UC12zKGLhMhDeDidoctM6BrA	Nonprofits & Activism	2079035	75	6	0.08	0	8	0	N
ALulSvxSL3o	Campanha de Vacinação contra o Sarampo - 20 a 29 anos	no		1574086690	00:00:30	Ministério da Saúde	UC12zKGLhMhDeDidoctM6BrA	Nonprofits & Activism	1929773	230	5	0.021739	0	10	0	N
dZVPiR8fJB8	VACINA - POLÊMICA DA SEMANA	no		1541253605	00:04:42	Porta dos Fundos	UCEWHPFNilsT0IfQfutVzsag	Entertainment	1591837	120101	4011	0.033397	0	4482	0	N
UM_mnIhHOXs	VACINAS FAZEM MAL? Nostalgia Ciência	yes	16	1545400804	00:12:29	Canal Nostalgia	UCH2VZQBLFTOp6I_qgnBJCuQ	Entertainment	1363152	230561	2996	0.012994	0	7802	0	N
zZDkk31QHHg	Tomei vacina 💉 e chorei 😂😂	no		1487812575	00:06:54	Eu você e nós	UC6nYtmaMh43WUQW5YeopuNg	People & Blogs	634749	25351	1299	0.051241	0		0	N		Cheerios; Lífshlaupid
MiIZlSNAu0E	EXISTE PERIGO NA VACINA? | Nerdologia	yes	44	1398951771	00:06:53	Nerdologia	UClu474HMt895mVxZdlIHXEA	Science & Technology	588497	59086	945	0.015994	0	3707	0	N
-emUlUIcKZE	ELA TEVE QUE TOMAR TRÊS VACINAS!!!!!	no		1554833687	00:12:06	Familia Jones	UC3PLVO-mt6ZQLiySKdJedCA	Entertainment	420288	32768	347	0.01059	0		0	N		Anuel AA; AUR; ELKO; Krónan; Mjolkursamsalan; Organifi
eZv0e_qSYbk	FAKE NEWS SOBRE VACINA - Ep. 1258	no		1534645253	00:11:29	Cadê a chave?	UCtrjFP7i92_30uv6IehwE5Q	Entertainment	418373	71561	2392	0.033426	0	2303	0	N
m8BvYiDeuYY	TOMANDO VACINA COM MEU NAMORADO! *Zabetta Macarini*	no		1562962501	00:06:46	Zabetta Macarini	UCbxeWUKWro8bMscsa36-BtA	Entertainment	359379	21854	360	0.016473	0	639	0	N		ROOMS TO GO
Ohug1xSNm_o	TOMANDO VACINA - TREMI E MORRI DE MEDO SIM!	no		1504544994	00:10:22	Sweet Carol	UCTFCMkTZPwi_PjerXYxDscA	Entertainment	310142	9468	420	0.04436	0	699	0	N		Teos; Valenta Pharm
aX5yDUtHY48	TOMAMOS 9 VACINAS EM UM DIA - ROTINA COM OS GÊMEOS GALVÃO	no		1551304800	00:21:56	Yasmin Galvão	UCOQ_KwPhg3IZbigiK7NCnfQ	People & Blogs	298315	16449	455	0.027661	0		0	N		DAZN; MasterClass; McDonalds
LnfzwZxL7bA	Vacinas do segundo mês do bebê: Reações? Rede pública? Rede privada?	no		1470963601	00:13:22	Thalita Campedelli	UClRUPXBd3zP3O1KCSeiMA2Q	People & Blogs	211272	3742	284	0.075895	0		0	N		AirMedCare Network
syA6bkZMd6s	A verdade sobre a febre amarela e a vacina - Dr Lair Ribeiro	no		1517357720	01:32:26	Minha Saúde - Curas Naturais	UCwQhAc44SfDvhdCQiHluBVQ	People & Blogs	209409	7753	343	0.044241	0	367	0	Y	H; E; L; O	7 Springs Orthopedics; Banza; Boiron; Datrium; Erie Metal Roofs; Lume Deodorant; PragerU; RapidfFN; Spotify; Ticketmaster
hUvHKz3ugOg	Vacinas valem a pena? (#Pirula 78.1)	yes	41	1398949205	00:32:14	Canal do Pirulla	UCdGpd0gNn38UKwoncZd9rmA	Science & Technology	208147	16993	370	0.021774	0	1234	0	N		Elgiganten; Kinder; TUI
tL4QF9avDts	TOMANDO VACINA DE NOVO... AINDA TEMOS MEDO!!! MAS TEM GENTE PIOR...RSRS	no		1570375802	00:13:03	Gemeas Japonesas	UCJMH8GNRXMjr2uGci28v9_g	People & Blogs	194867	4151	277	0.066731	0		0	N		GLAS
fKhz2YOjU7U	REAÇÕES À VACINA – COMO AJUDAR O SEU BEBÊ | Monica Romeiro	no		1535029208	00:08:10	Almanaque dos Pais	UCy7oVBYY0FGXeeJpy6ITXxQ	People & Blogs	185221	10045	229	0.022797	0	375	0	N		KRY; Radisson Hotels
M9vTSPBz034	BEBÊ TOMOU A VACINA DE 3 MESES VARRENDO NOSSO APÊ E MAIS | VLOG	no		1547064005	00:10:32	Mari Cavilha	UCOS_wL35NuMn8qLASOQqfUQ	People & Blogs	177111	22352	1049	0.046931	0		0	N		Dyson; Ford; GLAS; Metro The Game; Starflow
YEkJKC5mgBs	VACINAS Ele dissse tudo ISSO!! sob juramento em um tribunal (INCRÍVEL E TENEBROSO)	no		1558353623	00:20:07	nutrição Alimentos & Cia	UCQNi2fXhCHRu8-b-w29SMCA	Education	173683	10439	477	0.045694	0	1233	0	Y	O; E; M	Bondic; Health and Wellness Tools
tUjSyGuprTs	Vacinas são mesmo perigosas pra você? | Minuto da Terra	no		1466776805	00:03:15	Minuto da Terra	UCB0zinWfy-dS_NqcOINYo3A	Science & Technology	173199	9483	82	0.008647	0	424	0	N		Guts & Gusto; Moes Complex
aUtyGkG9DSc	TIPOS DE BEBÊS RECEM-NASCIDOS TOMANDO VACINA COM BEBÊ REBORN- GABI REBORN	no		1573253233	00:10:45	gabi reborn	UCk5P5ft8WxlmBrvwmqmYLwQ	Entertainment	167140	8989	343	0.038158	0	291	0	N		Alpro; Cluse; Diesel; Otrivin; Seats and Sofas; Wolfgang Digital
4lWjrOEp6FA	Super Vacina Natural Contra a Gripe Dr Lair Ribeiro	no		1535494305	00:03:23	O Melhor Para Você	UCVPdtCCsEsem4hyVwS_GzOQ	People & Blogs	164691	11400	119	0.010439	0	272	0	Y	L
X6AzUMm6W0c	Desmentindo a Globo AO VIVO Sobre as Campanhas de VACINAÇÃO!	no		1493298326	00:05:43	FOGO VIVO de YAUH יהוה	UCIFYUiFUWCQzDc9nc6KY2Ig	People & Blogs	164064	2492	300	0.120385	0	499	0	Y	N; D; E; J
JaMDUQyG0as	DEVO OU NÃO ME VACINAR CONTRA GRIPE? (Tiago Rocha)	no		1493939645	00:05:31	Palestrante Tiago Rocha	UCfMqB9cB9RfC1r2CMPnYDNw	People & Blogs	154111	9528	209	0.021935	0	491	0	Y	L
ra_ebPTgzzw	Vacinas e Soros	no		1376920211	00:05:47	SAS Educacao	UCNjPniJ9bZuCDQXCRqNsCBQ	Education	150417	3247	41	0.012627	0	127	0	N
FvXye0_Cwok	Quem deve tomar a vacina contra o sarampo | Coluna #117	no		1565618403	00:04:33	Drauzio Varella	UC9zqTTVeClpqMQ5CLuJdWtw	Science & Technology	148683	9842	137	0.01392	0	378	0	N		Coca-Cola; Colgate
GVZ_YGr2m5o	Por que existem ingredientes tóxicos nas vacinas? | Minuto da Terra	no		1464703200	00:03:04	Minuto da Terra	UCB0zinWfy-dS_NqcOINYo3A	Science & Technology	133142	8055	64	0.007945	0	196	0	N		FBTO; The Searchers
4-OgRxfZChA	como funciona a vacina	no		1250610486	00:01:33	verdadeoculta	UCPHXtAKuUXPOwdEUzMgSD0A	Science & Technology	128125	597	45	0.075377	0	100	0	N		Motiv-Academy
2p9vqg8_Hsk	Por que existe gente antivacinas? (OU: o tempo algoz das memórias) (#Pirula 267)	no		1538103407	00:21:43	Canal do Pirulla	UCdGpd0gNn38UKwoncZd9rmA	Science & Technology	126844	17986	321	0.017847	0	1703	0	N		Get Green Juice; Zwerfkei
duiI2RyeY4c	LEVAMOS A BEBÊ PARA VACINAR | Priscila Simões	no		1540128281	00:12:20	Priscila Simões	UCyE4KeQg54Bx34LxQB22xkw	People & Blogs	125422	19137	158	0.008256	0	516	0	N		Dyson; OPP Finans; Radisson Hotels; VG Pluss
fpQ5P5wVTWY	Vacina da Febre Amarela - Tomar ou Não? • Dr. Alexandre Feldman	no		1516826526	00:15:13	Alexandre Feldman	UCi2zMfox-UpFGAFfsMXqYfQ	Science & Technology	112930	3362	271	0.080607	0	245	0	N		IKEA; Polizei NRW
KdCCbazbKAI	⚠️VEJA A VERDADE POR DETRÁS DA VACINA DA FEBRE AMARELA | Hangout Dr Lair Ribeiro.	no		1517357689	01:32:26	U MIÓ QUE TÁ TENO	UC4F32QLrpDmmRrozxr9z59g	Science & Technology	112039	6897	186	0.026968	0	398	0	Y	H; E; L; O	Buscopan; Incredible India; Japan Gov; Kia; Philips; SEAT
EhpjwaXnmv4	Quais Vacinas a Gestante Deve Tomar?	no		1480108738	00:03:20	Dr. Igor Padovesi	UC3O9y5JRSBqn4YhCEvBys_Q	People & Blogs	111962	7329	79	0.010779	0	235	0	N		Zuruck Zum Ursprung
xFZCZXckG60	Dúvidas sobre a Vacina contra Sarampo | Dra Ana Escobar	yes	42	1532617668	00:03:11	Dra Ana Escobar	UCKtJs_zI1yzswHDWqkqHtWw	Education	105977	206	6	0.029126	0	18	0	N		Land Rover; Philips
LEmxXprE_sg	A TÃO TEMIDA VACINA DE 2 MESES ALICE TEVE REAÇÃO FEBRE E MUITO CHORO | VLOG	no		1544126401	00:15:37	Mari Cavilha	UCOS_wL35NuMn8qLASOQqfUQ	People & Blogs	104517	14591	447	0.030635	0		0	N		Ascension; bellafill; Challenge Accepted; Google; GoPro; New Orleans; Nicorette
m6XH3c1uz7M	Especialista fala dos efeitos colaterais da vacina da gripe	no		1337363478	00:06:38	Jovem Pan News	UCP391YRAjSOdM_bwievgaZA	News & Politics	102496	718	181	0.252089	0	311	0	N		turbotax; Walgreens
1JFqv8Ks81Y	Anti-vacinas terraplanistas e punh....gorilas (#Pirula 214)	no		1496581816	00:23:35	Canal do Pirulla	UCdGpd0gNn38UKwoncZd9rmA	Science & Technology	99574	11328	291	0.025689	0	839	0	N		Alternative Apparel; Preparation H; Primatene; Ticket Master
1NnFE7x7K9o	Carteiras de vacina em dia | Dra Ana Escobar	no		1531920636	00:01:56	Dra Ana Escobar	UCKtJs_zI1yzswHDWqkqHtWw	Education	97017	115	1	0.008696	0	7	0	N
GlOaGXP1tPI	Domingo Espetacular conversa com pais que decidiram não vacinar os filhos	no		1502109491	00:12:50	Domingo Espetacular	UCP-Vg2PcmLiWpEdvMI1R35w	Entertainment	96276	1705	154	0.090323	0	2630	0	Y	J; E; L; O; F
WbWimhT7lxk	Campanha de Vacinação contra a Poliomielite e Sarampo (60 )	no		1533044929	00:01:00	Ministério da Saúde	UC12zKGLhMhDeDidoctM6BrA	Nonprofits & Activism	95427	614	115	0.187296	0	46	0	N
TP-7tk1hOxs	VACINAS NO BRASIL | DOSE DE ATUALIDADES | DESCOMPLICA	no		1571580002	00:13:00	Descomplica	UCT0JugAtGmqiYkwxFZOwAtg	Education	80679	8887	44	0.004951	0	212	0	N
rv5HImuSutA	Doses da vacinação contra a hepatite B | Drauzio Comenta #69	no		1506952804	00:02:25	Drauzio Varella	UC9zqTTVeClpqMQ5CLuJdWtw	Science & Technology	79633	3076	41	0.013329	0	143	0	N
ZrreJeV_-HQ	Saiba quem não deve tomar a vacina contra febre amarela	no		1516364816	00:03:19	SP no Ar	UCQKBmUf2GZUXRQFpzCPN5og	News & Politics	76973	590	64	0.108475	0	111	0	N
2XyfJx14ygc	Febre amarela: saiba se você precisa tomar a vacina | Dr. Salim | Jovem Pan	no		1494883417	00:05:16	Jovem Pan News	UCP391YRAjSOdM_bwievgaZA	News & Politics	75959	1076	116	0.107807	0	160	0	N
iCoBbzfFZXw	Tire todas as dúvidas sobre o sarampo e a campanha de vacinação	no		1563991555	00:02:45	Catraca Livre	UCv2svvDbMNunUuPs8hUUKVA	News & Politics	74880	1325	105	0.079245	0	88	0	N
HDWPA6RlV5c	Minha experiência de quase morte com a vacina da febre amarela	no		1516541415	00:05:17	Patricia Bencardini	UCRlrE2ZyiPLyS61pgJCIoUA	Comedy	73959	1866	118	0.063237	0	465	0	N
A5Q-N3dP7nQ	Vacinação contra gripe | Mitos e verdades	no		1399062646	00:04:24	Ministério da Saúde	UC12zKGLhMhDeDidoctM6BrA	Nonprofits & Activism	64640	775	78	0.100645	0	0	0	N
iwjG2F0J8yc	Vacinação Saúde Pública e Liberdade de Escolha	no		1533239398	01:09:40	Biologia Total com Prof. Jubilut	UCG-eghyORxNrzSG8FkAWKyw	Education	62665	5687	91	0.016001	0	291	0	N
dohuRW3iBRg	VOCÊ DEVE TOMAR A VACINA DA FEBRE AMARELA?	yes	36	1517493438	00:10:20	Dr. Lair Ribeiro Oficial	UCk9mgpQVdJ5oKQWkM1UPBaQ	Entertainment	58878	4339	107	0.02466	0	370	0	Y	O
bHx4h10n4TQ	Verdade das vacinas sujas revelada	no		1275673466	00:07:14	aphomeopatiaTV	UCTGVdd_qB7Rz4X4oAKZ0kyg	People & Blogs	56329	419	19	0.045346	0	38	0	Y	E; C; A; N; H
8jTEpEx9a_M	Vacina tríplice viral: sarampo caxumba e rubéola devem ser prevenidas também na fase adulta	no		1402927916	00:01:37	Minha Vida	UCMYTIyqS1-7wT-3pBB8bR5A	Science & Technology	56165	472	40	0.084746	0	21	0	N
5TuBArbnPwU	Uma vacina contra o câncer	no		1544118643	00:06:57	Dr. Lair Ribeiro Oficial	UCk9mgpQVdJ5oKQWkM1UPBaQ	Entertainment	55081	5768	37	0.006415	0	234	0	Y	L
2IxJ7xMqZt8	Como as vacinas agem no nosso corpo?	no		1345575234	00:01:11	ntvale	UChK2Fhha3BMBVSu8yqCWYZw	Travel & Events	54911	345	9	0.026087	0	14	0	N
sqFOgtDzu7g	REAÇÕES DAS VACINAS	no		1470102175	00:08:26	WELIDA DANCINI	UCORRcj9wv5DEYCEg2LhBcLQ	People & Blogs	54733	590	72	0.122034	0	54	0	N
MGG-T0A33uE	DGA - Mamãe Falei apoia Anti-Vacina	no		1535140651	00:16:57	Maestro Bogs	UCRoiyPUpRJxPkVZYY1fHE1Q	Comedy	52032	5237	1565	0.298835	0	864	0	N
cSG3-7IF4Gc	A importância da vacinação | Temas de Redação	no		1536699604	00:07:38	Aulalivre - Enem 2020 e vestibulares	UC4zG6UeNUn-HM6UEFFkiESA	Education	49356	2896	41	0.014157	0	84	0	N		Static; Max Barskih
prlTBT0bARE	A vacina da gripe pode causar reação?	no		1554931262	00:14:45	Record News	UCuiLR4p6wQ3xLEm15pEn1Xw	News & Politics	48862	539	101	0.187384	0	223	0	N
SqQgYIRqfAU	Médicos esclarecem quem deve e quem não pode tomar a vacina contra a febre amarela	no		1509236418	00:03:06	Jornal da Record	UCmpHPgeCBgvk_fDXZQKsnAA	News & Politics	48852	269	35	0.130112	0	18	0	N		Get Pain Releaf; Static
Spf1OC9ceWE	A vacinação e o sistema imunológico	no		1500409791	00:02:19	afpbr	UCamgdcs45ToPrIV7wmT7iYg	News & Politics	48659	1016	13	0.012795	0	0	0	N		Lecturio
yoBMBqSBHBY	Café com Vacina - Café Com Quê? 19 | BláBláLogia	no		1495565042	00:23:52	BláBláLogia	UC3Ooj_iDWELBumIEDejyNHQ	People & Blogs	48457	6583	45	0.006836	0	364	0	N
5wseA00941w	VACINAS ATRASADAS NINA E MANUH - Tiago e Gabi 882	no		1534896650	00:12:26	Tiago e Gabi	UCPaL0Om2geEJyjncqTGm49A	People & Blogs	46209	7074	64	0.009047	0	469	0	N		bebe; Buscopan
IORKEU8oVFg	Posso me VACINAR contra a GRIPE? | Prof. Paulo Jubilut	no		1525384801	00:06:15	Biologia Total com Prof. Jubilut	UCG-eghyORxNrzSG8FkAWKyw	Education	46046	3706	155	0.041824	0	326	0	N
xqBoD-ha6H0	Por Que Vacinar?	no		1423702824	00:18:56	Eu Ciência	UCmOqIaUBwlSK6lVGC2o46JA	Science & Technology	45874	4886	32	0.006549	0	311	0	N
Cg-Vm6R5XNI	Movimento antivacina é criminoso diz Drauzio Varella	no		1561573310	00:39:56	BBC News Brasil	UCthbIFAxbXTTQEC7EcQvP1Q	News & Politics	45031	3565	265	0.074334	0	1075	0	N		Mercedes; Benetton
T1ArUvap1NI	Quem pode e quem não pode tomar a vacina contra a febre amarela? Dr. Lair Ribeiro	no		1517431470	00:10:49	Minha Saúde - Curas Naturais	UCwQhAc44SfDvhdCQiHluBVQ	People & Blogs	44107	1199	43	0.035863	0	59	0	Y	E; L	Mindvalley; Digital Dream Lifestyle; Weiterdenker; Unichamp
BirgLRWaXic	Devo tomar a vacina de gripe?	no		1365448504	00:04:41	Jovem Pan News	UCP391YRAjSOdM_bwievgaZA	News & Politics	43054	613	190	0.309951	0	274	0	N		Hello Fresh; Incredible India
X1gBFYCBdJk	Vacinar ou Não contra HPV? | Dr. Dayan Siebra	no		1515073811	00:08:19	Dr. Dayan Siebra	UClN6OLbLp1YjTSwDOkEM2dA	Entertainment	42208	4918	60	0.0122	0	315	0	N		NYX Cosmetics; gTV Deutschland
wPeQwmacTxk	Imunologia – Vacinas (Aula 02) com Prof. Marcus Vinícius Paiva	no		1438607954	00:18:37	CEAR UEG	UCoC9FjH7GgWoPIYfr8sEJdQ	Education	41795	392	107	0.272959	0	21	0	N
Dg4-yopvINU	Saiba quem não deve tomar a vacina contra a Febre Amarela	no		1485869403	00:01:47	PUC TV GOIÁS	UCBx_CluVFNvy0TXsmNBZ-ow	News & Politics	41124	262	28	0.10687	0	45	0	N		Incredible India
0z2XzdqAMVQ	Qual o perigo das vacinas? | Ponto em Comum Doc	no		1534860000	01:31:37	Ponto em Comum	UCGo3vjM2Ll3XujL-zYT5SMg	Education	40927	5620	59	0.010498	0	403	0	N		Die Kanguru-Chroniken; ETF
ZfqwKtmzXkU	VACINAS REAÇÕES 4°MÊS	no		1561035782	00:21:33	Dicas Lara Ferreira	UC4JEf2ejgucNsmsFiEy0mSw	People & Blogs	40552	3892	43	0.011048	0	227	0	N		Diesel
MSA7ItalCQk	Ação das vacinas no corpo humano	no		1553287556	00:20:54	Khan Academy Brasil	UCXj2oSzwg6G0iBjKg33joMQ	Education	38815	1159	89	0.07679	0	183	0	N
VxcX6S8mwhQ	Primeiros dias do bebê: vacinas e outras dúvidas - Criar e Crescer	no		1462973401	00:02:50	Criar e Crescer	UCgbbjw8zPkrmmL_XU1SgJBg	Education	37983	1920	22	0.011458	0	41	0	N
KQb7HJAgGxw	História da Vacina	no		1457539615	00:13:25	Lais Biolog	UCDbSk1EuJeXL2sCis8cvo-g	People & Blogs	36062	381	27	0.070866	0	31	0	N		Salzburg Milch
bxsh5SaYbyk	Vlog - Vacina de 4 Meses + Reações	no		1539825277	00:18:03	Sabrina Bernini	UCsNFdDp3O_lhT_QNkMdk4XA	Entertainment	36015	4949	65	0.013134	0		0	N
AmrNqVJuwgY	VACINA PARA GRIPE - Tomar ou não? | Medicina Ortomolecular	no		1543341601	00:04:30	Dr J Bussade	UCOX1xjMcnZVmV-yx0VC6Fvg	People & Blogs	34474	1759	35	0.019898	0	120	0	Y	J; E; D; A
nl0JhFXTgw0	Vacina tríplice bacteriana: previna-se de tétano difteria e coqueluche	no		1401721024	00:01:47	Minha Vida	UCMYTIyqS1-7wT-3pBB8bR5A	Science & Technology	34405	277	14	0.050542	0	7	0	N		Qurios
am9XxFOMkt8	Dica de Saúde - Vacina Pentavalente	no		1343932464	00:01:48	TV UFMS	UC4p7d_1KehpvAb7_9-WlkdA	News & Politics	33961	260	42	0.161538	0	15	0	N
Ft-GGlq4XR0	Grávidas devem tomar vacinas. Saiba quais são	no		1431708624	00:02:13	Jornal da Alterosa	UCxbqmMsXory_zC-kNqKHUgw	News & Politics	31391	157	18	0.11465	0	9	0	N		Leap4Freedom
5ymr8JwOcHw	Dr Lair Ribeiro | AFINAL: QUEM pode ou não pode tomar a VACINA contra a FeBRe AMARELA?	no		1517706300	00:10:14	Junior Hallak Medicina e Saúde	UCPR3gVNYBzi-02_O4noC1Zg	People & Blogs	31223	2049	28	0.013665	0	100	0	Y	E; L	Patrick van Diemen; Digital Dream Lifestyle; Leap4Freedom; grosz
a3p5rGrotNc	Saiba mitos e verdades sobre a vacina contra H1N1 – CN Notícias	no		1461937633	00:02:20	TV Canção Nova	UCVrKQMmA2ew9LFzeIDaOFgw	Entertainment	30642	301	70	0.232558	0	0	0	N
nq214q1RusY	Lair ribeiro Vitamina D3 A Vacina Contra O Cancer	no		1420297019	00:05:19	Cizio Oliveira	UCB64lmy3pK38sjYIVjiZN8A	People & Blogs	30048	994	11	0.011066	0	33	0	Y	L
iXFdmzAR7KA	Vacinas Podem Causar Autismo? Elas contém Mercúrio?| Lenda ou Fato	yes	29	1495720806	00:09:13	Canal do Schwarza	UCWq1xltHB2fDe6YkYoOrryg	Entertainment	29847	4762	201	0.042209	0	323	0	N
ibU743D6I0k	Dia “D” | Vacinação contra poliomielite e sarampo	no		1415637171	00:01:57	Ministério da Saúde	UC12zKGLhMhDeDidoctM6BrA	Nonprofits & Activism	29030	168	23	0.136905	0	0	0	N
MIloJPdLBy8	Vacinação - parte 01	no		1517257340	00:14:43	DoutorMoises	UCW3l9WndLOjhRtsg0Aa--2g	Science & Technology	27553	1039	41	0.039461	0		0	N
EwtBkDtCURQ	TUDO QUE VOCÊ SEMPRE QUIS (E PRECISOU) SABER SOBRE VACINAS | MACETES DE MÃE	no		1560175200	00:36:31	Macetes de Mãe	UCTrx5uG9vJjTLloAH8hE-pg	People & Blogs	26743	2171	28	0.012897	0	211	0	N
qfdRzSIL7AQ	GESTANTES DEVEM SE VACINAR?	no		1537239802	00:04:52	Beep Saúde	UCzzv3f3UIhYZlIeuOl2QH9Q	Science & Technology	26568	165	47	0.284848	0	6	0	N
fzilpZotG9w	O garoto ANTI VACINA que SE DEU MAL	no		1561669637	00:05:47	Mundo Bizarro /Jr	UCPQqOZhDKr9AjLfXDOjoaww	Comedy	25992	3763	189	0.050226	0	639	0	N		SDI Broker; Garnier
uKxMk0-YU6c	Descubra como é feita a vacina contra a gripe do Instituto Butantan	no		1460759255	00:01:55	Canal da Saúde	UCpZO2Fi6cd_PXZNH0yeGjSw	News & Politics	25836	251	34	0.135458	0	33	0	N
fF53D9Pteo0	O Governo e a Mídia MENTEM. AS VACINAS CAUSAM DOENÇAS E DANOS AO SISTEMA IMUNOLÓGICO.	no		1395003851	00:13:03	Capixaba Otário	UCNMwzMh0MW_J_nK9kMS4ldg	People & Blogs	25547	397	33	0.083123	0	114	0	Y	N; G; D; J; O; Q; A; K; E; F
0UUWs5e8cB0	VACINOSE : Doença secundária à Vacina / Dr. Lair Ribeiro	no		1517505267	00:04:41	Junior Hallak Medicina e Saúde	UCPR3gVNYBzi-02_O4noC1Zg	People & Blogs	25452	1235	29	0.023482	0	93	0	Y	L	SDI Broker; Mindvalley
S4QEEbQCjeE	CRISE DA VACINAÇÃO NO BRASIL: PREVENÇÃO DE DOENÇAS E SAÚDE PÚBLICA | Atualidades e Tema de Redação	no		1534255794	00:08:04	Curso Enem Gratuito	UC_53VGoH_0XLFmYVpGMvhvg	Education	24361	794	36	0.04534	0	72	0	N		Sundaram Mutual; Maybelline
1kp2M6pKqVk	Posso me vacinar gripado?	no		1524164476	00:00:45	Ministério da Saúde	UC12zKGLhMhDeDidoctM6BrA	Nonprofits & Activism	23902	227	12	0.052863	0	5	0	N
wW99VYHtois	Dra. Mônica Valverde Viana - Febre Amarela: Vacinar ou Não? Tire suas Dúvidas!	no		1516741950	00:08:46	Dra Monica Valverde Viana	UCEA5mVrH3jPMmuah5qD0DUA	People & Blogs	23613	602	36	0.059801	0	257	0	N
fk5pWfmgXaw	Jovens e adolescentes precisam de vacinar contra HPV e Meningite	no		1521153517	00:01:18	Ministério da Saúde	UC12zKGLhMhDeDidoctM6BrA	Nonprofits & Activism	23544	145	6	0.041379	0	3	0	N
U8iUGMthWT4	Esclareça dúvidas sobre a vacina de sarampo	yes	26	1532631601	00:07:06	Ver Mais Londrina	UCGfBE94turq_hyKMxB-Dfrg	People & Blogs	23285	353	33	0.093484	0		0	N		Mindvalley
UKO0Lkh4A-c	Detectada Possível Causa do Autismo e Surpresa: Não são as Vacinas | Lenda ou Fato (Hoje é Fato)	yes	37	1533244122	00:05:07	Canal do Schwarza	UCWq1xltHB2fDe6YkYoOrryg	Entertainment	22623	4056	246	0.060651	0	301	0	N
sMv3IKEBysM	Vlog da minha semana : Vacina contra Sarampo Corte de cabelo etc - CAROL SANTINA	no		1565989205	00:11:00	Carol Santina	UClmKoaOV0xdb_2HgKNmo5nA	Entertainment	22540	1843	20	0.010852	0		0	N		DryNites; Episod; Amazon
4a44xhw-u9g	SURTO DE SARAMPO. Veja se você precisa se vacinar	no		1563808792	00:22:19	Morning Show	UC-wcdrzucnlKGBjyEUaEWaQ	News & Politics	22211	814	152	0.186732	0	330	0	N		Lidl; Geolocalisation Vehicules; SNCF; Lidl
UJbKtUj8Nxw	Calendário de Vacinação nos Primeiros Meses do Bebê | Clínica Pró Imune	no		1476923295	00:05:07	Cinemátika Filmes - Produtora de Vídeo	UC4aOaBcNPsZlSREx0p71jeA	Science & Technology	21587	435	24	0.055172	0	11	0	N
CK_cRiQq1Q4	Entenda quais são os sintomas do sarampo e quem deve ser vacinado	no		1532345732	00:03:03	Jovem Pan News	UCP391YRAjSOdM_bwievgaZA	News & Politics	21474	303	19	0.062706	0	10	0	N		NYX; Aptamil
MDLmi-gj5hs	LULA vetou em 2010 vacina para meningite doença que matou seu Neto	no		1551527398	00:01:37	Canal Monarquia Livre	UCPkousjreAFvcwhywDmIzIQ	News & Politics	21198	492	115	0.23374	0	168	0	N
sI0_lbQnvBA	Campanha de vacinação contra gripe é prorrogada	no		1529017697	00:02:45	TV Canção Nova	UCVrKQMmA2ew9LFzeIDaOFgw	Entertainment	20668	114	26	0.22807	0	0	0	N
SCApZjL6i8w	Mitos e Verdades: Vacinação Contra o Influenza - Você Bonita (23/04/18)	no		1524511179	00:24:34	Você Bonita	UCxucJ9P3mLMneYypLZYn2uw	Howto & Style	19676	477	30	0.062893	0	51	0	N		BoxaGrippal; Renault
wJiCAxA_OFs	VACINAS QUE A GESTANTE PRECISA TOMAR | Gravidez	no		1552496408	00:05:12	Almanaque dos Pais	UCy7oVBYY0FGXeeJpy6ITXxQ	People & Blogs	19383	1827	22	0.012042	0	159	0	N		Elevit; Cosmoprof
xMGVuUg_MJ4	Vacina contra o sarampo - Mulheres (18/07/19)	no		1563484909	00:19:49	Mulheres	UCDtVoSwSwQgwhcC89Nlz5Vg	Entertainment	19232	295	21	0.071186	0	62	0	N
WD3rOXk7xHI	HOUSE TEMPORADA 1 EP 2 - VACINA....	no		1495640333	00:01:31	MELHORES CENAS DO CINEMA	UC9z9JemVpHB7BJtXjESAsOw	People & Blogs	19226	268	4	0.014925	0	4	0	N		Nestle
uM0B60DEdPY	Gripe: Antibióticos X Vacinas | Dra Ana Escobar	no		1460467454	00:00:56	Dra Ana Escobar	UCKtJs_zI1yzswHDWqkqHtWw	Education	18369	55	3	0.054545	0	2	0	N
ky6eCkeuksY	Mãe relata como foi a reação de bebe após receber vacina	no		1510078199	00:02:58	Balanço Geral Itajaí	UCyvhqROV3luJvtt2dLTFhAA	People & Blogs	17850	166	15	0.090361	0	31	0	N		Bayer
QSpPhj5HiWI	Vacinação contra a gripe - Você Bonita (09/04/19)	no		1554833688	00:19:26	Você Bonita	UCxucJ9P3mLMneYypLZYn2uw	Howto & Style	17806	441	28	0.063492	0	94	0	N		IKEA; Cosmoprof
Xe7Fk9Oydl8	Pais decidem não vacinar os filhos por medo das reações que as vacinas podem provocar	yes	4	1505496847	00:11:55	Hoje em Dia	UCN-opsqqDunWO6h5uCp9Y4g	Entertainment	17733	229	47	0.20524	0	407	0	Y	O; F; L; E; J
BBumt4RY9z8	Mitos e Verdades sobre a Vacina da gripe e suas reações	no		1524488401	00:07:28	Almanaque dos Pais	UCy7oVBYY0FGXeeJpy6ITXxQ	People & Blogs	17415	1040	20	0.019231	0	136	0	N		Beru; Poseidon Expeditions
e0fAwNazC8s	#FalaGotinha - Vacinas para crianças de 1 a 4 anos	no		1546024103	00:01:05	Ministério da Saúde	UC12zKGLhMhDeDidoctM6BrA	Nonprofits & Activism	17402	202	17	0.084158	0	0	1	N
PnF0X7gY4io	DANIEL BECKER RESPONDE - VACINAR OU NÃO OS FILHOS? - CRIAR E CRESCER	no		1473255251	00:05:52	Criar e Crescer	UCgbbjw8zPkrmmL_XU1SgJBg	Education	17331	748	40	0.053476	0	88	0	Y	G; N	OPPO; Mobil
ruQ0rLeSeVo	Vacinas e efeito rebanho | Animações #13	no		1569247212	00:00:50	Drauzio Varella	UC9zqTTVeClpqMQ5CLuJdWtw	Science & Technology	17329	3510	19	0.005413	0	166	0	N		Universal Pictures
eJYJYBodH6U	Gravidez só um mês após a vacina	no		1517521430	00:03:17	Jornal da Gazeta	UCNl_i-ggJbZNyOLlhE7yyhw	News & Politics	16867	117	5	0.042735	0	9	0	N		Incredible India; XX Network
m7ctAH51DzQ	Bill Gates diz que vai reduzir 10 a 15% da população mundial através da vacinação...	no		1308689296	00:02:25	Paulo Almeida	UCKfap1xgEqqAhN7jtYgDsYg	Entertainment	16555	133	22	0.165414	0	18	0	Y	N; D; J; A; P; O
57tSQas4ViI	Alemanha quer multar quem não vacinar crianças contra sarampo	no		1557160041	00:00:25	euronews (em português)	UCUmEPYxmnyQDeRUcFkslmQw	News & Politics	16063	57	8	0.140351	0	5	0	N
7QNHecXOEOw	VACINA ATRASADA - como colocar em dia?	no		1470255803	00:03:47	WELIDA DANCINI	UCORRcj9wv5DEYCEg2LhBcLQ	People & Blogs	15999	242	19	0.078512	0	21	0	N		Magenta; IKEA
tMgs-BPcswk	Febre Amarela: que países exigem a vacina? DICAS DE VIAGEM	no		1494975602	00:10:22	Viajante Independente	UC2visps0yULA5lnn5Yjne9w	Travel & Events	15710	740	11	0.014865	0	97	0	N
QHZkGJCXlFw	A vacina da gripe causa reação?	no		1524166590	00:00:52	Ministério da Saúde	UC12zKGLhMhDeDidoctM6BrA	Nonprofits & Activism	15659	92	14	0.152174	0	7	0	N
5LflRyTSVD8	Saúde: mitos e verdades sobre vírus influenza e a vacina da gripe	no		1428901612	00:06:52	TV Chris Flores	UCmvavXl7cZAx-qXoDrmEqvw	People & Blogs	14896	195	15	0.076923	0	17	0	N
7F3krddfZWo	NOVAS SALAS DE VACINAS	no		1389811170	00:02:01	TV Poços	UCh6e1_rbI_pUASvnLV_nyxQ	News & Politics	14521	41	4	0.097561	0	3	0	N
yLpVxzmlj0o	Febre amarela- Tive reações da vacina	no		1516828976	00:01:47	Paulo Andrady	UCDgyuBDJGp5TlDMubeI-QdQ	People & Blogs	14346	114	16	0.140351	0	158	0	N
X7NryYy5z2o	VACINA DE 2 MESES #VLOG REAÇÕES DICAS CUIDADOS	no		1533330003	00:07:53	Priscila Faria	UCpvhFBKf_dacTd8NFRgcTxQ	People & Blogs	14336	400	19	0.0475	0	48	0	N		Jeep; Lecturio
Xo9MCcjFyIc	Uma direita anti-científica anti-vacina e anti-razão.	no		1565218172	00:14:05	conde loppeux	UC-aa1wREP4i9XRA5_rqed0A	Entertainment	14314	1912	214	0.111925	0	799	0	N
FJss0otJi-U	Vacina da Gripe 2018 - informações importantes em 2 minutos	no		1523589465	00:02:14	Otorrino Experts	UCGD5wBPI0T6J1IiJqcHnIMQ	People & Blogs	14012	165	19	0.115152	0	23	0	N		Groover
MeC4j-9DiS4	Entenda quais são as vacinas específicas para adultos	no		1511370823	00:02:51	Balanço Geral	UCqZN-NqgP7bhbctbyThSVUA	News & Politics	13998	209	8	0.038278	0	14	0	N		My Commerce
clP6AmsREjQ	Dr. Sproesser tira dúvidas sobre vacina prevenção e tratamento da gripe	no		1522857342	00:18:48	Hoje em Dia	UCN-opsqqDunWO6h5uCp9Y4g	Entertainment	13657	293	48	0.163823	0	27	0	N		Grosz; Mike Harhang
2TUkO_KU--I	#31 - Reação da vacina 😭	no		1532560660	00:10:26	Pai_xao Vlogs	UCXQatvGsVCzrm35PnxoHJsA	People & Blogs	13515	2122	26	0.012253	0		0	N		Red Bull; Voltaren; Red Bull
a4CkTZdZFgE	#1 - Período da Campanha Nacional de Vacinação contra Sarampo e Poliomielite	no		1533045170	00:01:00	Ministério da Saúde	UC12zKGLhMhDeDidoctM6BrA	Nonprofits & Activism	13481	128	8	0.0625	0	13	0	N
0DuHI0E6Bc4	#6 Qual a importância da Vacinação Infantil?	no		1533155035	00:01:00	Ministério da Saúde	UC12zKGLhMhDeDidoctM6BrA	Nonprofits & Activism	13382	147	5	0.034014	0	2	0	N
4HYYM5u95EQ	Como funcionam as vacinas	no		1516806226	00:03:43	DECO PROTESTE	UCOjnB2Ul08J7jM9npAvo6EA	News & Politics	13363	78	8	0.102564	0	0	0	N
3SpiKe04erk	A IMPORTÂNCIA DA VACINAÇÃO | com Drauzio Varella	no		1562860801	00:04:14	Tua Saúde	UCUp-GSUuNxSZ7cxOg7ZnyqA	Science & Technology	13106	871	42	0.04822	0	107	0	N
xOgEVpswgEc	Ministério da Saúde reforça recomendação de vacina contra febre amarela e sarampo	no		1550222979	00:01:16	Jovem Pan News	UCP391YRAjSOdM_bwievgaZA	News & Politics	13086	95	7	0.073684	0	10	0	N
0N2rqAHsxcs	🔴 Conheça A VACINA CONTRA O CÂNCER!!! E A Dieta Da Sua Cura!!! Lair Ribeiro Responde	no		1545482682	00:14:56	SAÚDE & BEM ESTAR	UCe1XNXkGImWSq5n4wkzNjBw	People & Blogs	12978	1198	12	0.010017	0	50	0	Y	L	DG Achieve; Patrick van Diemen
tD6EYsXAS6A	vacina da gripe para toda a população a partir de segunda-feira - oi????	no		1496455134	00:06:21	Ana Paula Palagar	UCLr31O2rNob_pzh1UnPcNOg	Entertainment	12771	1174	31	0.026405	0	206	0	Y	E; N; O	Lecturio; Happn
xWV2ndHVPOw	Alumínio presente em vacinas causa autismo? | Drauzio News #26	yes	3	1557928809	00:02:04	Drauzio Varella	UC9zqTTVeClpqMQ5CLuJdWtw	Science & Technology	12757	1800	83	0.046111	0	183	0	N		Cool Blue
VVgGNj-PRVU	Vacinar é proteger: a importância da vacinação e os perigos da não imunização	no		1499115844	00:09:25	Ministério da Saúde	UC12zKGLhMhDeDidoctM6BrA	Nonprofits & Activism	12632	160	8	0.05	0	1	0	N		Mijn baan in de praktijk; VEVA
JUIaeUQQ3oY	VACINA H1N1 NAO TOME PESQUISE ANTES!.wmv	no		1266467539	00:06:01	Carlos Iafelice Junior	UCkYT8YPzCP0bGJkO6RBeRuA	Education	12604	395	4	0.010127	0		0	Y	O; N; G
UOlQh8yFmUc	Vacinação - parte 02	no		1517335167	00:13:26	DoutorMoises	UCW3l9WndLOjhRtsg0Aa--2g	Science & Technology	12482	469	16	0.034115	0		0	N
YAvL5WThX6w	Vacina do sarampo: a mãe que perdeu 2 filhos por acreditar em fake news	yes	13	1562608773	00:03:07	BBC News Brasil	UCthbIFAxbXTTQEC7EcQvP1Q	News & Politics	12104	998	39	0.039078	0	225	0	N
SRM7eLrTEEc	Duas mortes por reação à vacina	no		1516401712	00:03:34	Jornal da Gazeta	UCNl_i-ggJbZNyOLlhE7yyhw	News & Politics	12054	154	10	0.064935	0	50	0	N		Outriders; Mijn baan in de praktijk
q6P4BtDfUxw	Vacinar os filhos é obrigação | Andrea Rosana Silva | Cabine #16	no		1535565606	00:03:33	Drauzio Varella	UC9zqTTVeClpqMQ5CLuJdWtw	Science & Technology	11975	1635	40	0.024465	0	114	0	N		Sandaya; Nationale Vacaturebank
oq_1yc85u38	Soro e Vacina - Brasil Escola	no		1514311209	00:08:31	Brasil Escola	UCsgHWN8lYveMUEWTDheTjZA	Education	11451	601	7	0.011647	0	20	0	N
PW7xAm1carU	Como as vacinas são produzidas? - Todo Seu (06/04/18)	no		1523305358	00:05:37	Todo Seu	UCW4t6ozY9VDVeN_GHK260BQ	Entertainment	11132	216	17	0.078704	0	14	0	N
wPnjgdjT5n4	Gripe: Alergia a Ovo X Vacinas | Dra Ana Escobar	no		1461876778	00:00:54	Dra Ana Escobar	UCKtJs_zI1yzswHDWqkqHtWw	Education	10983	90	3	0.033333	0	15	0	N
3N4zpKDTMIU	Ministério da Saúde esclarece boatos sobre microcefalia - Vacinas	no		1449858663	00:01:28	Ministério da Saúde	UC12zKGLhMhDeDidoctM6BrA	Nonprofits & Activism	10875	26	19	0.730769	0	19	0	N
SmMt2pXgnto	O MITO E O PERIGO DO MOVIMENTO ANTIVACINA | Natalia Pasternak	no		1573736942	00:11:27	Casa do Saber	UCtvvTFp0XANyllOdmzZr9VQ	Education	10811	1885	43	0.022812	0	289	0	N
P-8N4JfC4xg	Vacinação contra a febre amarela | Drauzio News #28	no		1559138409	00:02:37	Drauzio Varella	UC9zqTTVeClpqMQ5CLuJdWtw	Science & Technology	10603	1367	9	0.006584	0	38	0	N		MasterClass
f5DoMoPwPKw	A polêmica das vacinas contra o vírus HPV | H1N1 | Guillan barré e Zica Virus	no		1451581074	00:08:16	Ezequiel Cordeiro - Hora Final	UCl4swlkSKDinuw5w5S77m8A	People & Blogs	10553	243	12	0.049383	0	50	0	Y	A; D; M; N; J; H
FOrZXG-6DG4	Que movimento é esse ANTIVACINA?	no		1534254720	00:02:47	Canal Futura	UC2mmP8ysfyko40KSn90x6Og	Education	10416	567	36	0.063492	0	374	0	N
9VAEqQNcRcA	A NOVA REVOLTA DA VACINA - VACINAS NÃO MATAM OLAVO MENTIU	yes	33	1543958100	00:11:56	O Historiador	UC5ZXYxeWlROKbL7JziJ0bIQ	People & Blogs	10329	1794	133	0.074136	0	227	0	N		Alex Dusseldorf Coaching; DAZN; Alex Dusseldorf Coaching; 90s Super Show; Get green juice; Code Institute
MiC6Oc0y7I4	VLOG - VACINAS DE 2 MESES + REAÇÕES | STEFANY RAGO	no		1554339905	00:08:50	Stefany Rago	UCOcG-EPdn2gsWVuMpF1TRVA	News & Politics	10311	551	8	0.014519	0	58	0	N		Code Institute; Jeep
SDX1R_uR5C4	Ministério da Saúde cria campanha de combate a fake news sobre vacinação	no		1538071056	00:02:20	Jornal Hoje em Dia	UCaPx61H8Gu9a6Zg4riqV-jA	News & Politics	10039	227	5	0.022026	0	2	0	N

## Sheet: machado_2020-vaccine_md_videos
Id	Label	isseed	seedrank	publishedat	duration	channeltitle	channelid	videocategorylabel	viewcount	likecount	dislikecount	dislikelikeratio	favoritecount	commentcount	componentnumber	hasmisinformation	misinformationcode	brandad
syA6bkZMd6s	A verdade sobre a febre amarela e a vacina - Dr Lair Ribeiro	no		1517357720	01:32:26	Minha Saúde - Curas Naturais	UCwQhAc44SfDvhdCQiHluBVQ	People & Blogs	209409	7753	343	0.044241	0	367	0	Y	H; E; L; O	7 Springs Orthopedics; Banza; Boiron; Datrium; Erie Metal Roofs; Lume Deodorant; PragerU; RapidfFN; Spotify; Ticketmaster
YEkJKC5mgBs	VACINAS Ele dissse tudo ISSO!! sob juramento em um tribunal (INCRÍVEL E TENEBROSO)	no		1558353623	00:20:07	nutrição Alimentos & Cia	UCQNi2fXhCHRu8-b-w29SMCA	Education	173683	10439	477	0.045694	0	1233	0	Y	O; E; M	Bondic; Health and Wellness Tools
4lWjrOEp6FA	Super Vacina Natural Contra a Gripe Dr Lair Ribeiro	no		1535494305	00:03:23	O Melhor Para Você	UCVPdtCCsEsem4hyVwS_GzOQ	People & Blogs	164691	11400	119	0.010439	0	272	0	Y	L
X6AzUMm6W0c	Desmentindo a Globo AO VIVO Sobre as Campanhas de VACINAÇÃO!	no		1493298326	00:05:43	FOGO VIVO de YAUH יהוה	UCIFYUiFUWCQzDc9nc6KY2Ig	People & Blogs	164064	2492	300	0.120385	0	499	0	Y	N; D; E; J
JaMDUQyG0as	DEVO OU NÃO ME VACINAR CONTRA GRIPE? (Tiago Rocha)	no		1493939645	00:05:31	Palestrante Tiago Rocha	UCfMqB9cB9RfC1r2CMPnYDNw	People & Blogs	154111	9528	209	0.021935	0	491	0	Y	L
KdCCbazbKAI	⚠️VEJA A VERDADE POR DETRÁS DA VACINA DA FEBRE AMARELA | Hangout Dr Lair Ribeiro.	no		1517357689	01:32:26	U MIÓ QUE TÁ TENO	UC4F32QLrpDmmRrozxr9z59g	Science & Technology	112039	6897	186	0.026968	0	398	0	Y	H; E; L; O	Buscopan; Incredible India; Japan Gov; Kia; Philips; SEAT
GlOaGXP1tPI	Domingo Espetacular conversa com pais que decidiram não vacinar os filhos	no		1502109491	00:12:50	Domingo Espetacular	UCP-Vg2PcmLiWpEdvMI1R35w	Entertainment	96276	1705	154	0.090323	0	2630	0	Y	J; E; L; O; F
dohuRW3iBRg	VOCÊ DEVE TOMAR A VACINA DA FEBRE AMARELA?	yes	36	1517493438	00:10:20	Dr. Lair Ribeiro Oficial	UCk9mgpQVdJ5oKQWkM1UPBaQ	Entertainment	58878	4339	107	0.02466	0	370	0	Y	O
bHx4h10n4TQ	Verdade das vacinas sujas revelada	no		1275673466	00:07:14	aphomeopatiaTV	UCTGVdd_qB7Rz4X4oAKZ0kyg	People & Blogs	56329	419	19	0.045346	0	38	0	Y	E; C; A; N; H
5TuBArbnPwU	Uma vacina contra o câncer	no		1544118643	00:06:57	Dr. Lair Ribeiro Oficial	UCk9mgpQVdJ5oKQWkM1UPBaQ	Entertainment	55081	5768	37	0.006415	0	234	0	Y	L
T1ArUvap1NI	Quem pode e quem não pode tomar a vacina contra a febre amarela? Dr. Lair Ribeiro	no		1517431470	00:10:49	Minha Saúde - Curas Naturais	UCwQhAc44SfDvhdCQiHluBVQ	People & Blogs	44107	1199	43	0.035863	0	59	0	Y	E; L	Digital Dream Lifestyle; Mindvalley; Unichamp; Weiterdenker
AmrNqVJuwgY	VACINA PARA GRIPE - Tomar ou não? | Medicina Ortomolecular	no		1543341601	00:04:30	Dr J Bussade	UCOX1xjMcnZVmV-yx0VC6Fvg	People & Blogs	34474	1759	35	0.019898	0	120	0	Y	J; E; D; A
5ymr8JwOcHw	Dr Lair Ribeiro | AFINAL: QUEM pode ou não pode tomar a VACINA contra a FeBRe AMARELA?	no		1517706300	00:10:14	Junior Hallak Medicina e Saúde	UCPR3gVNYBzi-02_O4noC1Zg	People & Blogs	31223	2049	28	0.013665	0	100	0	Y	E; L	Andreas Grosz; Digital Dream Lifestyle; Leap4Freedom; Patrick van Diemen
nq214q1RusY	Lair ribeiro Vitamina D3 A Vacina Contra O Cancer	no		1420297019	00:05:19	Cizio Oliveira	UCB64lmy3pK38sjYIVjiZN8A	People & Blogs	30048	994	11	0.011066	0	33	0	Y	L
fF53D9Pteo0	O Governo e a Mídia MENTEM. AS VACINAS CAUSAM DOENÇAS E DANOS AO SISTEMA IMUNOLÓGICO.	no		1395003851	00:13:03	Capixaba Otário	UCNMwzMh0MW_J_nK9kMS4ldg	People & Blogs	25547	397	33	0.083123	0	114	0	Y	N; G; D; J; O; Q; A; K; E; F
0UUWs5e8cB0	VACINOSE : Doença secundária à Vacina / Dr. Lair Ribeiro	no		1517505267	00:04:41	Junior Hallak Medicina e Saúde	UCPR3gVNYBzi-02_O4noC1Zg	People & Blogs	25452	1235	29	0.023482	0	93	0	Y	L	Mindvalley; SDI Broker
Xe7Fk9Oydl8	Pais decidem não vacinar os filhos por medo das reações que as vacinas podem provocar	yes	4	1505496847	00:11:55	Hoje em Dia	UCN-opsqqDunWO6h5uCp9Y4g	Entertainment	17733	229	47	0.20524	0	407	0	Y	O; F; L; E; J
PnF0X7gY4io	DANIEL BECKER RESPONDE - VACINAR OU NÃO OS FILHOS? - CRIAR E CRESCER	no		1473255251	00:05:52	Criar e Crescer	UCgbbjw8zPkrmmL_XU1SgJBg	Education	17331	748	40	0.053476	0	88	0	Y	G; N	Mobil; OPPO
m7ctAH51DzQ	Bill Gates diz que vai reduzir 10 a 15% da população mundial através da vacinação...	no		1308689296	00:02:25	Paulo Almeida	UCKfap1xgEqqAhN7jtYgDsYg	Entertainment	16555	133	22	0.165414	0	18	0	Y	N; D; J; A; P; O
0N2rqAHsxcs	🔴 Conheça A VACINA CONTRA O CÂNCER!!! E A Dieta Da Sua Cura!!! Lair Ribeiro Responde	no		1545482682	00:14:56	SAÚDE & BEM ESTAR	UCe1XNXkGImWSq5n4wkzNjBw	People & Blogs	12978	1198	12	0.010017	0	50	0	Y	L	DG Achieve; Patrick van Diemen
tD6EYsXAS6A	vacina da gripe para toda a população a partir de segunda-feira - oi????	no		1496455134	00:06:21	Ana Paula Palagar	UCLr31O2rNob_pzh1UnPcNOg	Entertainment	12771	1174	31	0.026405	0	206	0	Y	E; N; O; P	Happn; Lecturio
JUIaeUQQ3oY	VACINA H1N1 NAO TOME PESQUISE ANTES!.wmv	no		1266467539	00:06:01	Carlos Iafelice Junior	UCkYT8YPzCP0bGJkO6RBeRuA	Education	12604	395	4	0.010127	0		0	Y	O; N; G
f5DoMoPwPKw	A polêmica das vacinas contra o vírus HPV | H1N1 | Guillan barré e Zica Virus	no		1451581074	00:08:16	Ezequiel Cordeiro - Hora Final	UCl4swlkSKDinuw5w5S77m8A	People & Blogs	10553	243	12	0.049383	0	50	0	Y	A; D; M; N; J; H

## Sheet: machado_2020-vaccine_md_videos_extra
Id	Label	isseed	seedrank	publishedat	duration	channeltitle	channelid	videocategorylabel	viewcount	likecount	dislikecount	dislikelikeratio	favoritecount	commentcount	componentnumber	hasmisinformation	misinformationcode	brandad
vUmhufdMOT0	Vacina contra a febre amarela - Você vai tomar ou não?				00:01:54	Minha Saúde - Curas Naturais	UCwQhAc44SfDvhdCQiHluBVQ	People & Blogs	3450	212	13		0	36	0	Y	D
kwTsEqrps1M	A polêmica das vacinas e o desespero das autoridades.				00:17:24	nutrição Alimentos & Cia	UCQNi2fXhCHRu8-b-w29SMCA	Education	90907	7500	231		0	897	0	Y	E; G; H; A; O; D; J
4T3tsb38BR8	TERAPIAS NATURAIS, Rede Globo ataca prof: Jaime Bruning				00:22:10	nutrição Alimentos & Cia	UCQNi2fXhCHRu8-b-w29SMCA	Education	3451	646	5		0	92	0	Y	L; N; A; E; O; J
2a3dO_JRNy0	Vírus mortos e vírus vivos componentes das vacinas.				00:08:00	nutrição Alimentos & Cia	UCQNi2fXhCHRu8-b-w29SMCA	Education	8078	1000	21		0	58	0	Y	E
m2nOK13e5aI	Alimentos, vacinas, GMOs e agenda global				00:13:51	nutrição Alimentos & Cia	UCQNi2fXhCHRu8-b-w29SMCA	Education	1924	288	5		0	22	0	Y	N; O
1biiJ8p19bA	SP confirma três mortes por reação à vacina da febre amarela.				00:07:27	nutrição Alimentos & Cia	UCQNi2fXhCHRu8-b-w29SMCA	Education	7786	523	18		0	108	0	Y	L
z81P5DUJPwI	Urgente!! NÃO Vacine seu filho (HPV) Cuidado Com a Nova CAMPANHA de Vacinação de 2018				00:01:31	FOGO VIVO de YAUH יהוה	UCIFYUiFUWCQzDc9nc6KY2Ig	People & Blogs	1681	44	26		0		0	Y	Q; D
BCENFIBLOo0	ANTES DE TOMAR A VACINA VEJA O QUE ESSE MÉDICO TEM A DIZER!!!				00:09:29	FOGO VIVO de YAUH יהוה	UCIFYUiFUWCQzDc9nc6KY2Ig	People & Blogs	15673	410	39		0	129	0	Y	A; Q; N; D
vAe1mgck4gs	Médico é Ameaçado Pela Rede Globo e é Obrigado a apagar seu Canal do Youtube				00:17:23	FOGO VIVO de YAUH יהוה	UCIFYUiFUWCQzDc9nc6KY2Ig	People & Blogs	541	56	3		0	18	0	Y	N; L; J; E; D; A
H3IwhYDqgJE	QUEM PODE TOMAR VACINA CONTRA FEBRE AMARELA?				00:08:46	Dr. Lair Ribeiro Oficial	UCk9mgpQVdJ5oKQWkM1UPBaQ	Entertainment	13343	880	11		0	48	0	Y	E; L
lg5NQhfCfoI	VACINAS e crimes contra a humanidade				00:04:43	aphomeopatiaTV	UCTGVdd_qB7Rz4X4oAKZ0kyg	People & Blogs	1192	16	2		0		0	Y	C; L; N; O; E; A
fPrvGLWITS0	''Vacinas'' transhumanistas				00:01:01	aphomeopatiaTV	UCTGVdd_qB7Rz4X4oAKZ0kyg	People & Blogs	163	5	2		0		0	Y	N; O
b_epkXU_pg0	VACINA HOMEOPÁTICA - Ah, isso existe?				00:02:55	aphomeopatiaTV	UCTGVdd_qB7Rz4X4oAKZ0kyg	People & Blogs	1918	5	4		0	2	0	Y	A; G; L; E; H; D
HqjjuaLLACY	VACINA ANTI-CÂNCER EXISTE? | Medicina Ortomolecular				00:09:04	Dr J Bussade	UCOX1xjMcnZVmV-yx0VC6Fvg	People & Blogs	1907	220	1		0	16	0	Y	L
mLbD7NQzUBc	VACINAS SÃO ASSASSINAS E PERIGOSAS. - PROGRAMA FALA ES.				00:11:01	Capixaba Otário	UCNMwzMh0MW_J_nK9kMS4ldg	People & Blogs	70017	1000	108		0	353	0	Y	E; C; A; N; H; D; J; O
nSZ3KFPnuvo	A importância da vacinação				00:08:27	Criar e Crescer	UCgbbjw8zPkrmmL_XU1SgJBg	Education	6585	308	4		0	25	0	Y	N
qc_fzeOJ0uk	Organização Mundial da Saúde Registos RSI Vacinação				00:01:07	Paulo Almeida	UCKfap1xgEqqAhN7jtYgDsYg	Entertainment	21				0		0	Y	A; J; N
nlmrbytZh4A	VACINA DA FEBRE AMARELA!!! Devemos Tomar??? E Como Erradicar??? Dr. Lair Ribeiro Responde!!!				00:14:27	SAÚDE & BEM ESTAR	UCe1XNXkGImWSq5n4wkzNjBw	People & Blogs	5089	408	5		0	80	0	Y	H; O	Christen in not; Eucerin; Fiat; Vileda
J3E_EPWRu38	Vacinados contra sarampo pega a doença e ainda contaminam outros imunizados.				00:08:24	Ana Paula Palagar	UCLr31O2rNob_pzh1UnPcNOg	Entertainment	271	62			0	12	0	Y	A; B; J	5econds; Adler Pharma
EI5s35zohtk	PORQUE ELES NÃO FALAM A VERDADE? DOENÇAS PROPAGANAS NAS VACINAS E ALIMENTAÇÃO.				00:21:03	Ana Paula Palagar	UCLr31O2rNob_pzh1UnPcNOg	Entertainment	1175	216	2		0	41	0	Y	E; A; N; L	Baumdick; The online traveller
YDmo-Jd8V0s	VACINA CONTRA GRIPE/ MITOS E VERDADES				00:12:08	Ana Paula Palagar	UCLr31O2rNob_pzh1UnPcNOg	Entertainment	14651	1100	42		0	162	0	Y	O; E; A; C
lVXVSNm7fUs	VACINAS: Você acredita Nelas?				00:51:09	Ana Paula Palagar	UCLr31O2rNob_pzh1UnPcNOg	Entertainment	273	56	3		0	3	0	Y	A; N; C; E; O; D; J
oFE0yu_S45s	A Ditadura Da Vacina Não Para.				00:46:21	Ana Paula Palagar	UCLr31O2rNob_pzh1UnPcNOg	Entertainment	512	141	2		0	10	0	Y	N; O; E; C; A; D; H; L
0aO_gdkkBlM	Novo estudo sobre vacinas conclui que elas causam comportamento anti-social				00:12:45	Ana Paula Palagar	UCLr31O2rNob_pzh1UnPcNOg	Entertainment	353	100	2		0	25	0	Y	N; E; D; O; H; A
qp11atE3auE	vacina hpv				00:09:18	Ana Paula Palagar	UCLr31O2rNob_pzh1UnPcNOg	Entertainment	200	29			0	4	0	Y	D; N; O; G; H
Qm3BcfyR1n4	vacinas são armas biológicas				00:16:15	Ana Paula Palagar	UCLr31O2rNob_pzh1UnPcNOg	Entertainment	3521	126	6		0	14	0	Y	O; C; D; E; N; A
Y2p5hkqFXWA	Gripe Suína A Tragédia da Vacina que Pode se Repetir.wmv				00:07:43	Carlos Iafelice Junior	UCkYT8YPzCP0bGJkO6RBeRuA	Education	3605	6	1		0		0	Y	D; A; N
wgxSXrhB5Yk	Cientistas e Enfermeiras recusam a tomar a Vacina para a Gripe A proposta de Quarentena				00:04:33	Carlos Iafelice Junior	UCkYT8YPzCP0bGJkO6RBeRuA	Education	934	3			0		0	Y	A; P; E; C; O
tCA1OSWEors	Vacinas obrigatórias: Elas são confiáveis? O que há por trás da vacina da febre amarela?				00:10:09	Ezequiel Cordeiro - Hora Final	UCl4swlkSKDinuw5w5S77m8A	People & Blogs	5222	421	13		0	63	0	Y	L; J; E; D; A; N; H; F; I; O	Eucerin
