# Supplementary material
Source: publisher figshare collection journal article supplement (https://frontiersin.figshare.com/ndownloader/files/25261583)
Supplement: Supplementary file 5 [file 25261583 › yt_recommendation/data/02-machado_2020_sample/machado_2020-vaccine_md_videos.csv]

Id	Label	isseed	seedrank	publishedat	duration	channeltitle	channelid	videocategorylabel	viewcount	likecount	dislikecount	dislikelikeratio	favoritecount	commentcount	componentnumber	hasmisinformation	misinformationcode	brandad
syA6bkZMd6s	A verdade sobre a febre amarela e a vacina - Dr Lair Ribeiro	no		1517357720	01:32:26	Minha Saúde - Curas Naturais	UCwQhAc44SfDvhdCQiHluBVQ	People & Blogs	209409	7753	343	0.044241	0	367	0	Y	H; E; L; O	7 Springs Orthopedics; Banza; Boiron; Datrium; Erie Metal Roofs; Lume Deodorant; PragerU; RapidfFN; Spotify; Ticketmaster
YEkJKC5mgBs	VACINAS Ele dissse tudo ISSO!! sob juramento em um tribunal (INCRÍVEL E TENEBROSO)	no		1558353623	00:20:07	nutrição Alimentos & Cia	UCQNi2fXhCHRu8-b-w29SMCA	Education	173683	10439	477	0.045694	0	1233	0	Y	O; E; M	Bondic; Health and Wellness Tools
4lWjrOEp6FA	Super Vacina Natural Contra a Gripe Dr Lair Ribeiro	no		1535494305	00:03:23	O Melhor Para Você	UCVPdtCCsEsem4hyVwS_GzOQ	People & Blogs	164691	11400	119	0.010439	0	272	0	Y	L
X6AzUMm6W0c	Desmentindo a Globo AO VIVO Sobre as Campanhas de VACINAÇÃO!	no		1493298326	00:05:43	FOGO VIVO de YAUH יהוה	UCIFYUiFUWCQzDc9nc6KY2Ig	People & Blogs	164064	2492	300	0.120385	0	499	0	Y	N; D; E; J
JaMDUQyG0as	DEVO OU NÃO ME VACINAR CONTRA GRIPE? (Tiago Rocha)	no		1493939645	00:05:31	Palestrante Tiago Rocha	UCfMqB9cB9RfC1r2CMPnYDNw	People & Blogs	154111	9528	209	0.021935	0	491	0	Y	L
KdCCbazbKAI	⚠️VEJA A VERDADE POR DETRÁS DA VACINA DA FEBRE AMARELA | Hangout Dr Lair Ribeiro.	no		1517357689	01:32:26	U MIÓ QUE TÁ TENO	UC4F32QLrpDmmRrozxr9z59g	Science & Technology	112039	6897	186	0.026968	0	398	0	Y	H; E; L; O	Buscopan; Incredible India; Japan Gov; Kia; Philips; SEAT
GlOaGXP1tPI	Domingo Espetacular conversa com pais que decidiram não vacinar os filhos	no		1502109491	00:12:50	Domingo Espetacular	UCP-Vg2PcmLiWpEdvMI1R35w	Entertainment	96276	1705	154	0.090323	0	2630	0	Y	J; E; L; O; F
dohuRW3iBRg	VOCÊ DEVE TOMAR A VACINA DA FEBRE AMARELA?	yes	36	1517493438	00:10:20	Dr. Lair Ribeiro Oficial	UCk9mgpQVdJ5oKQWkM1UPBaQ	Entertainment	58878	4339	107	0.02466	0	370	0	Y	O
bHx4h10n4TQ	Verdade das vacinas sujas revelada	no		1275673466	00:07:14	aphomeopatiaTV	UCTGVdd_qB7Rz4X4oAKZ0kyg	People & Blogs	56329	419	19	0.045346	0	38	0	Y	E; C; A; N; H
5TuBArbnPwU	Uma vacina contra o câncer	no		1544118643	00:06:57	Dr. Lair Ribeiro Oficial	UCk9mgpQVdJ5oKQWkM1UPBaQ	Entertainment	55081	5768	37	0.006415	0	234	0	Y	L
T1ArUvap1NI	Quem pode e quem não pode tomar a vacina contra a febre amarela? Dr. Lair Ribeiro	no		1517431470	00:10:49	Minha Saúde - Curas Naturais	UCwQhAc44SfDvhdCQiHluBVQ	People & Blogs	44107	1199	43	0.035863	0	59	0	Y	E; L	Digital Dream Lifestyle; Mindvalley; Unichamp; Weiterdenker
AmrNqVJuwgY	VACINA PARA GRIPE - Tomar ou não? | Medicina Ortomolecular	no		1543341601	00:04:30	Dr J Bussade	UCOX1xjMcnZVmV-yx0VC6Fvg	People & Blogs	34474	1759	35	0.019898	0	120	0	Y	J; E; D; A
5ymr8JwOcHw	Dr Lair Ribeiro | AFINAL: QUEM pode ou não pode tomar a VACINA contra a FeBRe AMARELA?	no		1517706300	00:10:14	Junior Hallak Medicina e Saúde	UCPR3gVNYBzi-02_O4noC1Zg	People & Blogs	31223	2049	28	0.013665	0	100	0	Y	E; L	Andreas Grosz; Digital Dream Lifestyle; Leap4Freedom; Patrick van Diemen
nq214q1RusY	Lair ribeiro Vitamina D3 A Vacina Contra O Cancer	no		1420297019	00:05:19	Cizio Oliveira	UCB64lmy3pK38sjYIVjiZN8A	People & Blogs	30048	994	11	0.011066	0	33	0	Y	L
fF53D9Pteo0	O Governo e a Mídia MENTEM. AS VACINAS CAUSAM DOENÇAS E DANOS AO SISTEMA IMUNOLÓGICO.	no		1395003851	00:13:03	Capixaba Otário	UCNMwzMh0MW_J_nK9kMS4ldg	People & Blogs	25547	397	33	0.083123	0	114	0	Y	N; G; D; J; O; Q; A; K; E; F
0UUWs5e8cB0	VACINOSE : Doença secundária à Vacina / Dr. Lair Ribeiro	no		1517505267	00:04:41	Junior Hallak Medicina e Saúde	UCPR3gVNYBzi-02_O4noC1Zg	People & Blogs	25452	1235	29	0.023482	0	93	0	Y	L	Mindvalley; SDI Broker
Xe7Fk9Oydl8	Pais decidem não vacinar os filhos por medo das reações que as vacinas podem provocar	yes	4	1505496847	00:11:55	Hoje em Dia	UCN-opsqqDunWO6h5uCp9Y4g	Entertainment	17733	229	47	0.20524	0	407	0	Y	O; F; L; E; J
PnF0X7gY4io	DANIEL BECKER RESPONDE - VACINAR OU NÃO OS FILHOS? - CRIAR E CRESCER	no		1473255251	00:05:52	Criar e Crescer	UCgbbjw8zPkrmmL_XU1SgJBg	Education	17331	748	40	0.053476	0	88	0	Y	G; N	Mobil; OPPO
m7ctAH51DzQ	Bill Gates diz que vai reduzir 10 a 15% da população mundial através da vacinação...	no		1308689296	00:02:25	Paulo Almeida	UCKfap1xgEqqAhN7jtYgDsYg	Entertainment	16555	133	22	0.165414	0	18	0	Y	N; D; J; A; P; O
0N2rqAHsxcs	🔴 Conheça A VACINA CONTRA O CÂNCER!!! E A Dieta Da Sua Cura!!! Lair Ribeiro Responde	no		1545482682	00:14:56	SAÚDE & BEM ESTAR	UCe1XNXkGImWSq5n4wkzNjBw	People & Blogs	12978	1198	12	0.010017	0	50	0	Y	L	DG Achieve; Patrick van Diemen
tD6EYsXAS6A	vacina da gripe para toda a população a partir de segunda-feira - oi????	no		1496455134	00:06:21	Ana Paula Palagar	UCLr31O2rNob_pzh1UnPcNOg	Entertainment	12771	1174	31	0.026405	0	206	0	Y	E; N; O; P	Happn; Lecturio
JUIaeUQQ3oY	VACINA H1N1 NAO TOME PESQUISE ANTES!.wmv	no		1266467539	00:06:01	Carlos Iafelice Junior	UCkYT8YPzCP0bGJkO6RBeRuA	Education	12604	395	4	0.010127	0		0	Y	O; N; G
f5DoMoPwPKw	A polêmica das vacinas contra o vírus HPV | H1N1 | Guillan barré e Zica Virus	no		1451581074	00:08:16	Ezequiel Cordeiro - Hora Final	UCl4swlkSKDinuw5w5S77m8A	People & Blogs	10553	243	12	0.049383	0	50	0	Y	A; D; M; N; J; H
