# Supplementary material
Source: publisher figshare collection journal article supplement (https://frontiersin.figshare.com/ndownloader/files/25261583)
Supplement: Supplementary file 5 [file 25261583 › yt_recommendation/data/02-machado_2020_sample/machado_2020-vaccine_md_videos_extra.csv]

Id	Label	isseed	seedrank	publishedat	duration	channeltitle	channelid	videocategorylabel	viewcount	likecount	dislikecount	dislikelikeratio	favoritecount	commentcount	componentnumber	hasmisinformation	misinformationcode	brandad
vUmhufdMOT0	Vacina contra a febre amarela - Você vai tomar ou não?				00:01:54	Minha Saúde - Curas Naturais	UCwQhAc44SfDvhdCQiHluBVQ	People & Blogs	3450	212	13		0	36	0	Y	D
kwTsEqrps1M	A polêmica das vacinas e o desespero das autoridades.				00:17:24	nutrição Alimentos & Cia	UCQNi2fXhCHRu8-b-w29SMCA	Education	90907	7500	231		0	897	0	Y	E; G; H; A; O; D; J
4T3tsb38BR8	TERAPIAS NATURAIS, Rede Globo ataca prof: Jaime Bruning				00:22:10	nutrição Alimentos & Cia	UCQNi2fXhCHRu8-b-w29SMCA	Education	3451	646	5		0	92	0	Y	L; N; A; E; O; J
2a3dO_JRNy0	Vírus mortos e vírus vivos componentes das vacinas.				00:08:00	nutrição Alimentos & Cia	UCQNi2fXhCHRu8-b-w29SMCA	Education	8078	1000	21		0	58	0	Y	E
m2nOK13e5aI	Alimentos, vacinas, GMOs e agenda global				00:13:51	nutrição Alimentos & Cia	UCQNi2fXhCHRu8-b-w29SMCA	Education	1924	288	5		0	22	0	Y	N; O
1biiJ8p19bA	SP confirma três mortes por reação à vacina da febre amarela.				00:07:27	nutrição Alimentos & Cia	UCQNi2fXhCHRu8-b-w29SMCA	Education	7786	523	18		0	108	0	Y	L
z81P5DUJPwI	Urgente!! NÃO Vacine seu filho (HPV) Cuidado Com a Nova CAMPANHA de Vacinação de 2018				00:01:31	FOGO VIVO de YAUH יהוה	UCIFYUiFUWCQzDc9nc6KY2Ig	People & Blogs	1681	44	26		0		0	Y	Q; D
BCENFIBLOo0	ANTES DE TOMAR A VACINA VEJA O QUE ESSE MÉDICO TEM A DIZER!!!				00:09:29	FOGO VIVO de YAUH יהוה	UCIFYUiFUWCQzDc9nc6KY2Ig	People & Blogs	15673	410	39		0	129	0	Y	A; Q; N; D
vAe1mgck4gs	Médico é Ameaçado Pela Rede Globo e é Obrigado a apagar seu Canal do Youtube				00:17:23	FOGO VIVO de YAUH יהוה	UCIFYUiFUWCQzDc9nc6KY2Ig	People & Blogs	541	56	3		0	18	0	Y	N; L; J; E; D; A
H3IwhYDqgJE	QUEM PODE TOMAR VACINA CONTRA FEBRE AMARELA?				00:08:46	Dr. Lair Ribeiro Oficial	UCk9mgpQVdJ5oKQWkM1UPBaQ	Entertainment	13343	880	11		0	48	0	Y	E; L
lg5NQhfCfoI	VACINAS e crimes contra a humanidade				00:04:43	aphomeopatiaTV	UCTGVdd_qB7Rz4X4oAKZ0kyg	People & Blogs	1192	16	2		0		0	Y	C; L; N; O; E; A
fPrvGLWITS0	''Vacinas'' transhumanistas				00:01:01	aphomeopatiaTV	UCTGVdd_qB7Rz4X4oAKZ0kyg	People & Blogs	163	5	2		0		0	Y	N; O
b_epkXU_pg0	VACINA HOMEOPÁTICA - Ah, isso existe?				00:02:55	aphomeopatiaTV	UCTGVdd_qB7Rz4X4oAKZ0kyg	People & Blogs	1918	5	4		0	2	0	Y	A; G; L; E; H; D
HqjjuaLLACY	VACINA ANTI-CÂNCER EXISTE? | Medicina Ortomolecular				00:09:04	Dr J Bussade	UCOX1xjMcnZVmV-yx0VC6Fvg	People & Blogs	1907	220	1		0	16	0	Y	L
mLbD7NQzUBc	VACINAS SÃO ASSASSINAS E PERIGOSAS. - PROGRAMA FALA ES.				00:11:01	Capixaba Otário	UCNMwzMh0MW_J_nK9kMS4ldg	People & Blogs	70017	1000	108		0	353	0	Y	E; C; A; N; H; D; J; O
nSZ3KFPnuvo	A importância da vacinação				00:08:27	Criar e Crescer	UCgbbjw8zPkrmmL_XU1SgJBg	Education	6585	308	4		0	25	0	Y	N
qc_fzeOJ0uk	Organização Mundial da Saúde Registos RSI Vacinação				00:01:07	Paulo Almeida	UCKfap1xgEqqAhN7jtYgDsYg	Entertainment	21				0		0	Y	A; J; N
nlmrbytZh4A	VACINA DA FEBRE AMARELA!!! Devemos Tomar??? E Como Erradicar??? Dr. Lair Ribeiro Responde!!!				00:14:27	SAÚDE & BEM ESTAR	UCe1XNXkGImWSq5n4wkzNjBw	People & Blogs	5089	408	5		0	80	0	Y	H; O	Christen in not; Eucerin; Fiat; Vileda
J3E_EPWRu38	Vacinados contra sarampo pega a doença e ainda contaminam outros imunizados.				00:08:24	Ana Paula Palagar	UCLr31O2rNob_pzh1UnPcNOg	Entertainment	271	62			0	12	0	Y	A; B; J	5econds; Adler Pharma
EI5s35zohtk	PORQUE ELES NÃO FALAM A VERDADE? DOENÇAS PROPAGANAS NAS VACINAS E ALIMENTAÇÃO.				00:21:03	Ana Paula Palagar	UCLr31O2rNob_pzh1UnPcNOg	Entertainment	1175	216	2		0	41	0	Y	E; A; N; L	Baumdick; The online traveller
YDmo-Jd8V0s	VACINA CONTRA GRIPE/ MITOS E VERDADES				00:12:08	Ana Paula Palagar	UCLr31O2rNob_pzh1UnPcNOg	Entertainment	14651	1100	42		0	162	0	Y	O; E; A; C
lVXVSNm7fUs	VACINAS: Você acredita Nelas?				00:51:09	Ana Paula Palagar	UCLr31O2rNob_pzh1UnPcNOg	Entertainment	273	56	3		0	3	0	Y	A; N; C; E; O; D; J
oFE0yu_S45s	A Ditadura Da Vacina Não Para.				00:46:21	Ana Paula Palagar	UCLr31O2rNob_pzh1UnPcNOg	Entertainment	512	141	2		0	10	0	Y	N; O; E; C; A; D; H; L
0aO_gdkkBlM	Novo estudo sobre vacinas conclui que elas causam comportamento anti-social				00:12:45	Ana Paula Palagar	UCLr31O2rNob_pzh1UnPcNOg	Entertainment	353	100	2		0	25	0	Y	N; E; D; O; H; A
qp11atE3auE	vacina hpv				00:09:18	Ana Paula Palagar	UCLr31O2rNob_pzh1UnPcNOg	Entertainment	200	29			0	4	0	Y	D; N; O; G; H
Qm3BcfyR1n4	vacinas são armas biológicas				00:16:15	Ana Paula Palagar	UCLr31O2rNob_pzh1UnPcNOg	Entertainment	3521	126	6		0	14	0	Y	O; C; D; E; N; A
Y2p5hkqFXWA	Gripe Suína A Tragédia da Vacina que Pode se Repetir.wmv				00:07:43	Carlos Iafelice Junior	UCkYT8YPzCP0bGJkO6RBeRuA	Education	3605	6	1		0		0	Y	D; A; N
wgxSXrhB5Yk	Cientistas e Enfermeiras recusam a tomar a Vacina para a Gripe A proposta de Quarentena				00:04:33	Carlos Iafelice Junior	UCkYT8YPzCP0bGJkO6RBeRuA	Education	934	3			0		0	Y	A; P; E; C; O
tCA1OSWEors	Vacinas obrigatórias: Elas são confiáveis? O que há por trás da vacina da febre amarela?				00:10:09	Ezequiel Cordeiro - Hora Final	UCl4swlkSKDinuw5w5S77m8A	People & Blogs	5222	421	13		0	63	0	Y	L; J; E; D; A; N; H; F; I; O	Eucerin
