# Supplementary material
Source: publisher figshare collection journal article supplement (https://frontiersin.figshare.com/ndownloader/files/25261583)
Supplement: Supplementary file 5 [file 25261583 › yt_recommendation/README.md]

# Natural stings: alternative health services selling distrust about vaccines on YouTube

## Dayane Fumiyo Tokojima Machado<sup>1,3</sup>, Alexandre Fioravante de Siqueira<sup>2,3</sup>, Leda Gitahy<sup>1</sup>

<sup>1</sup> _Department of Science and Technology Policy, Institute of Geosciences, State University of Campinas, Brazil_

<sup>2</sup> _Berkeley Institute for Data Science, University of California, Berkeley, USA_

<sup>3</sup> _Institute for Globally Distributed Open Research and Education (IGDORE)_

* This paper is available on: [[SocArXiv]](https://...)

This folder contains the following data:
* `data/01-initial_ytdt_query`: the initial query files, obtained using [YTDT](https://tools.digitalmethods.net/netvizz/youtube/).
* `data/02-machado_2020_sample`: the sample used on this study, and the second sample obtained from it.
* `screenshots_m&d`: screenshots from brands advertising in videos containing misinformation and disinformation (M&D) about vaccines.

For more details on how this data was obtained, please check _Materials and Methods_ on the paper.
