# Supplementary material
Source: publisher figshare collection journal article supplement (https://frontiersin.figshare.com/ndownloader/files/25261583)

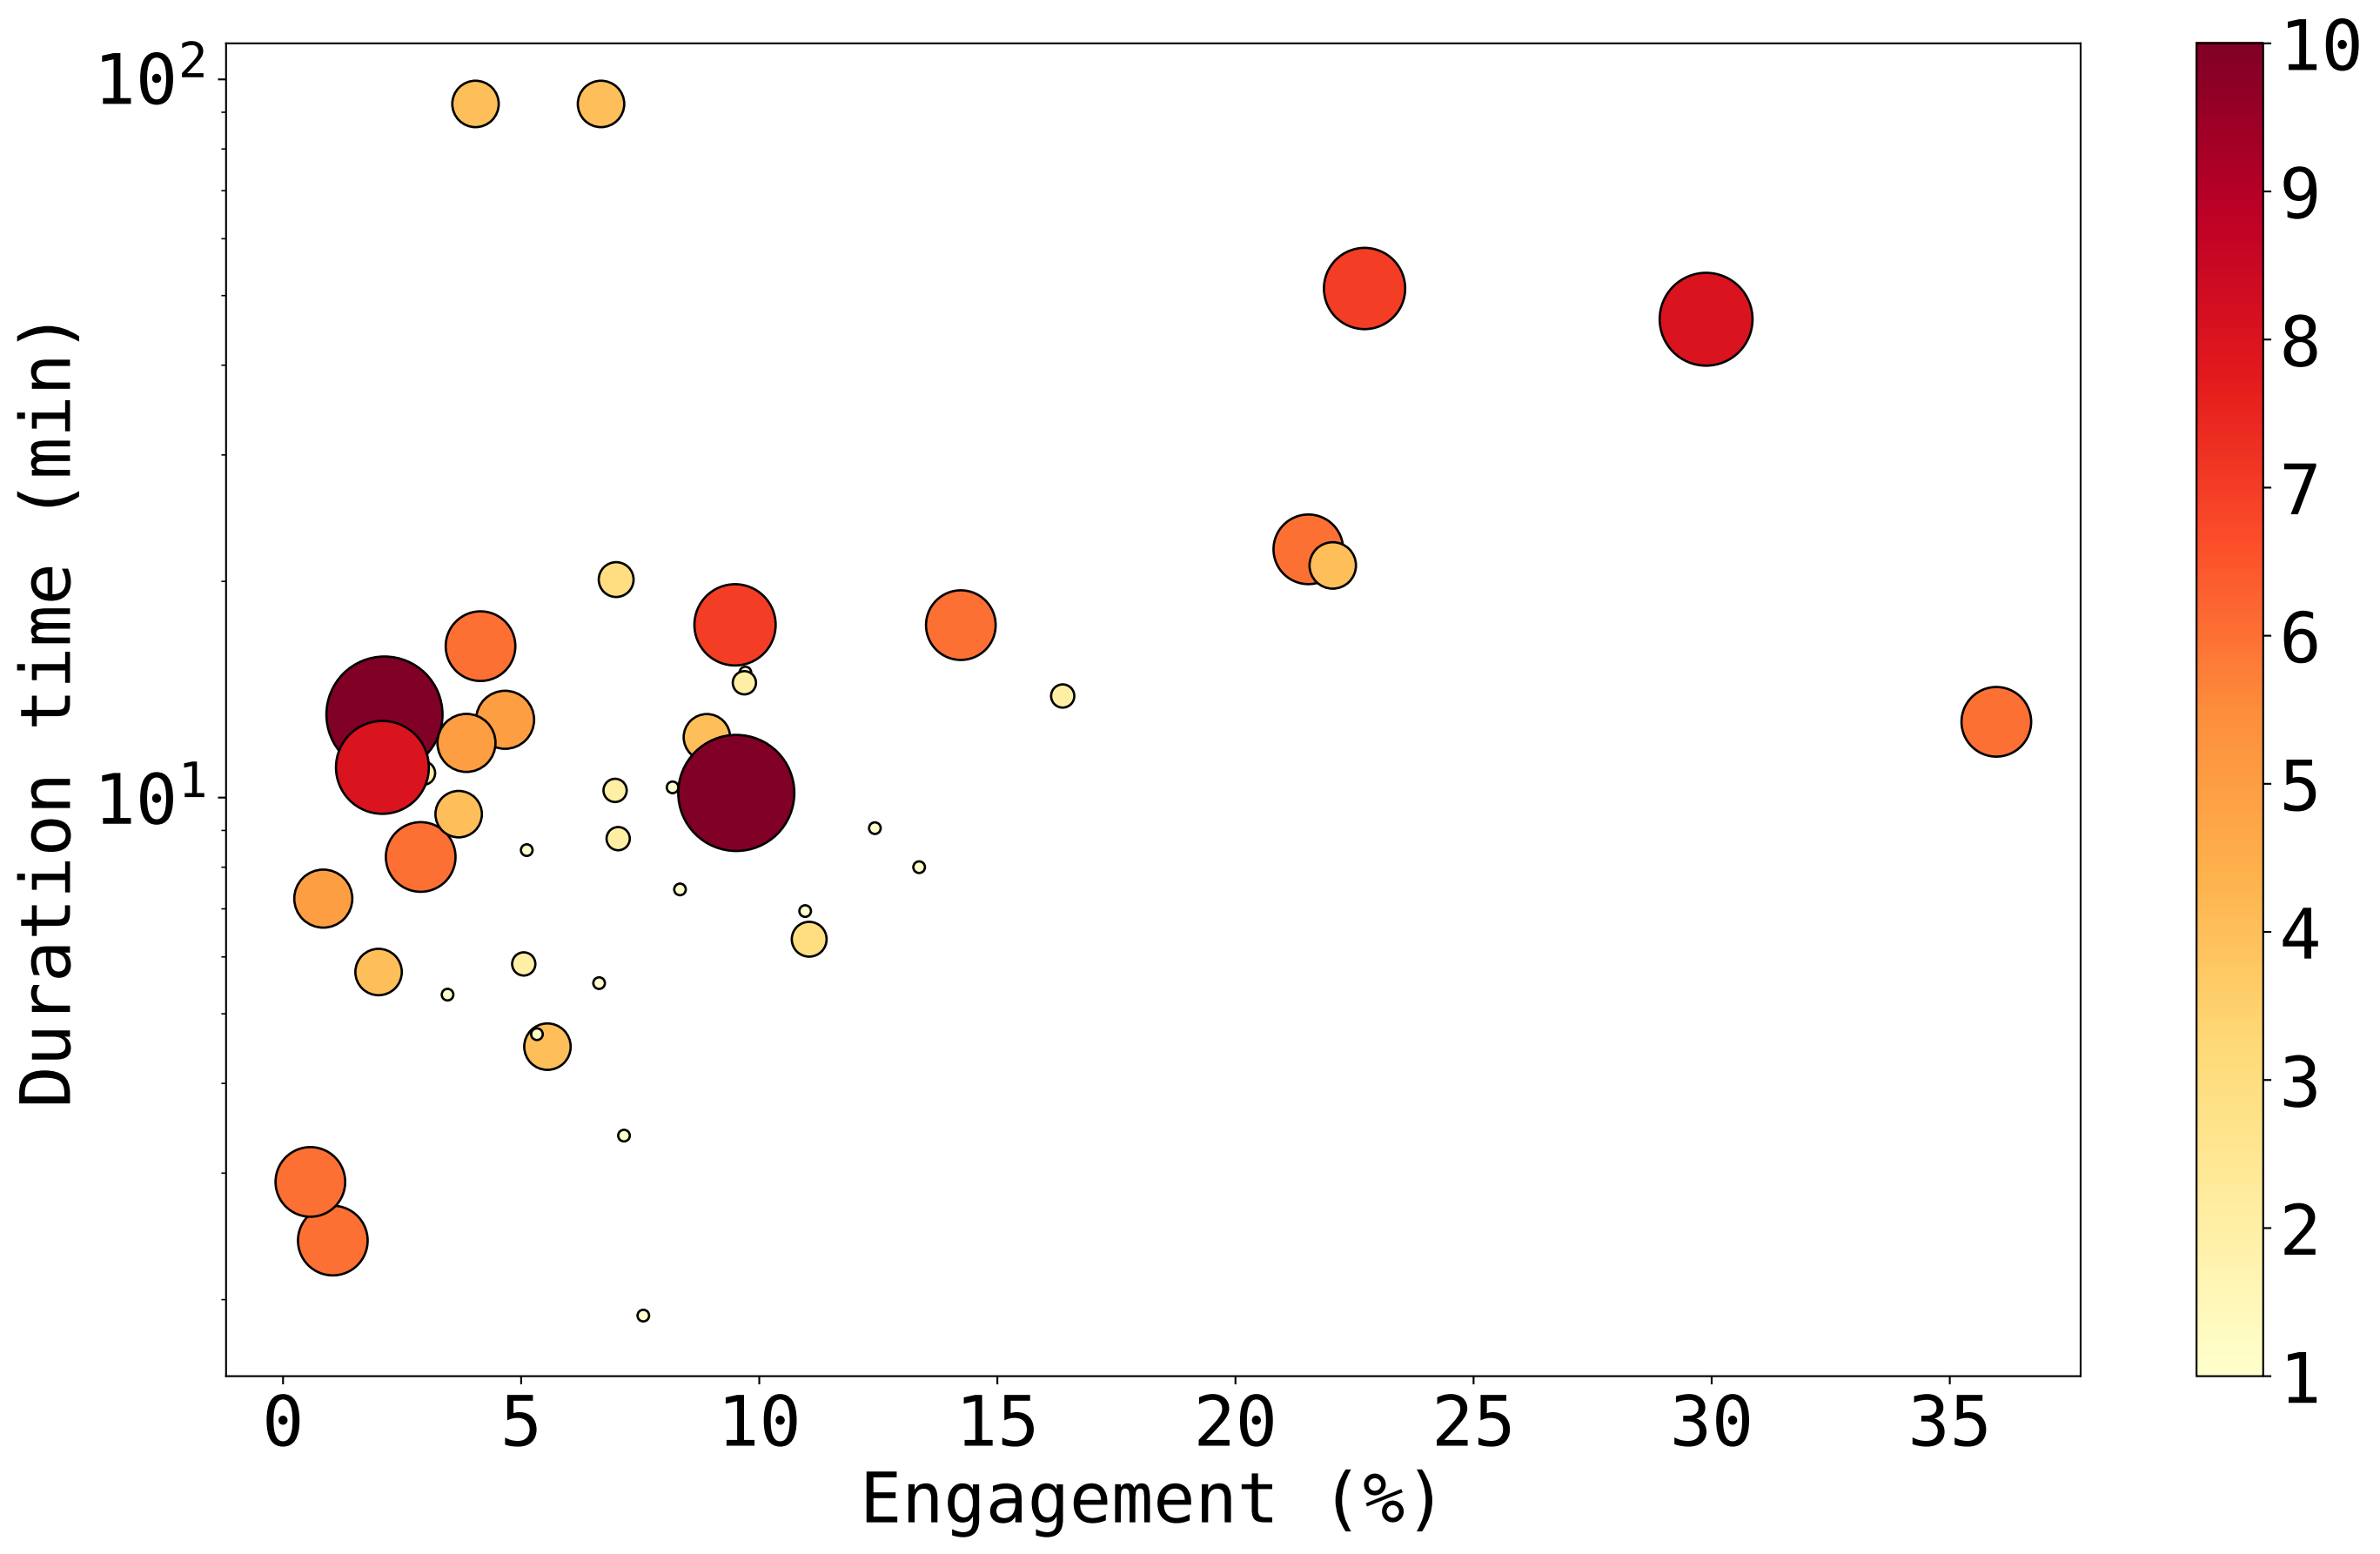

Supplement: Supplementary file 1 [file 25261583]

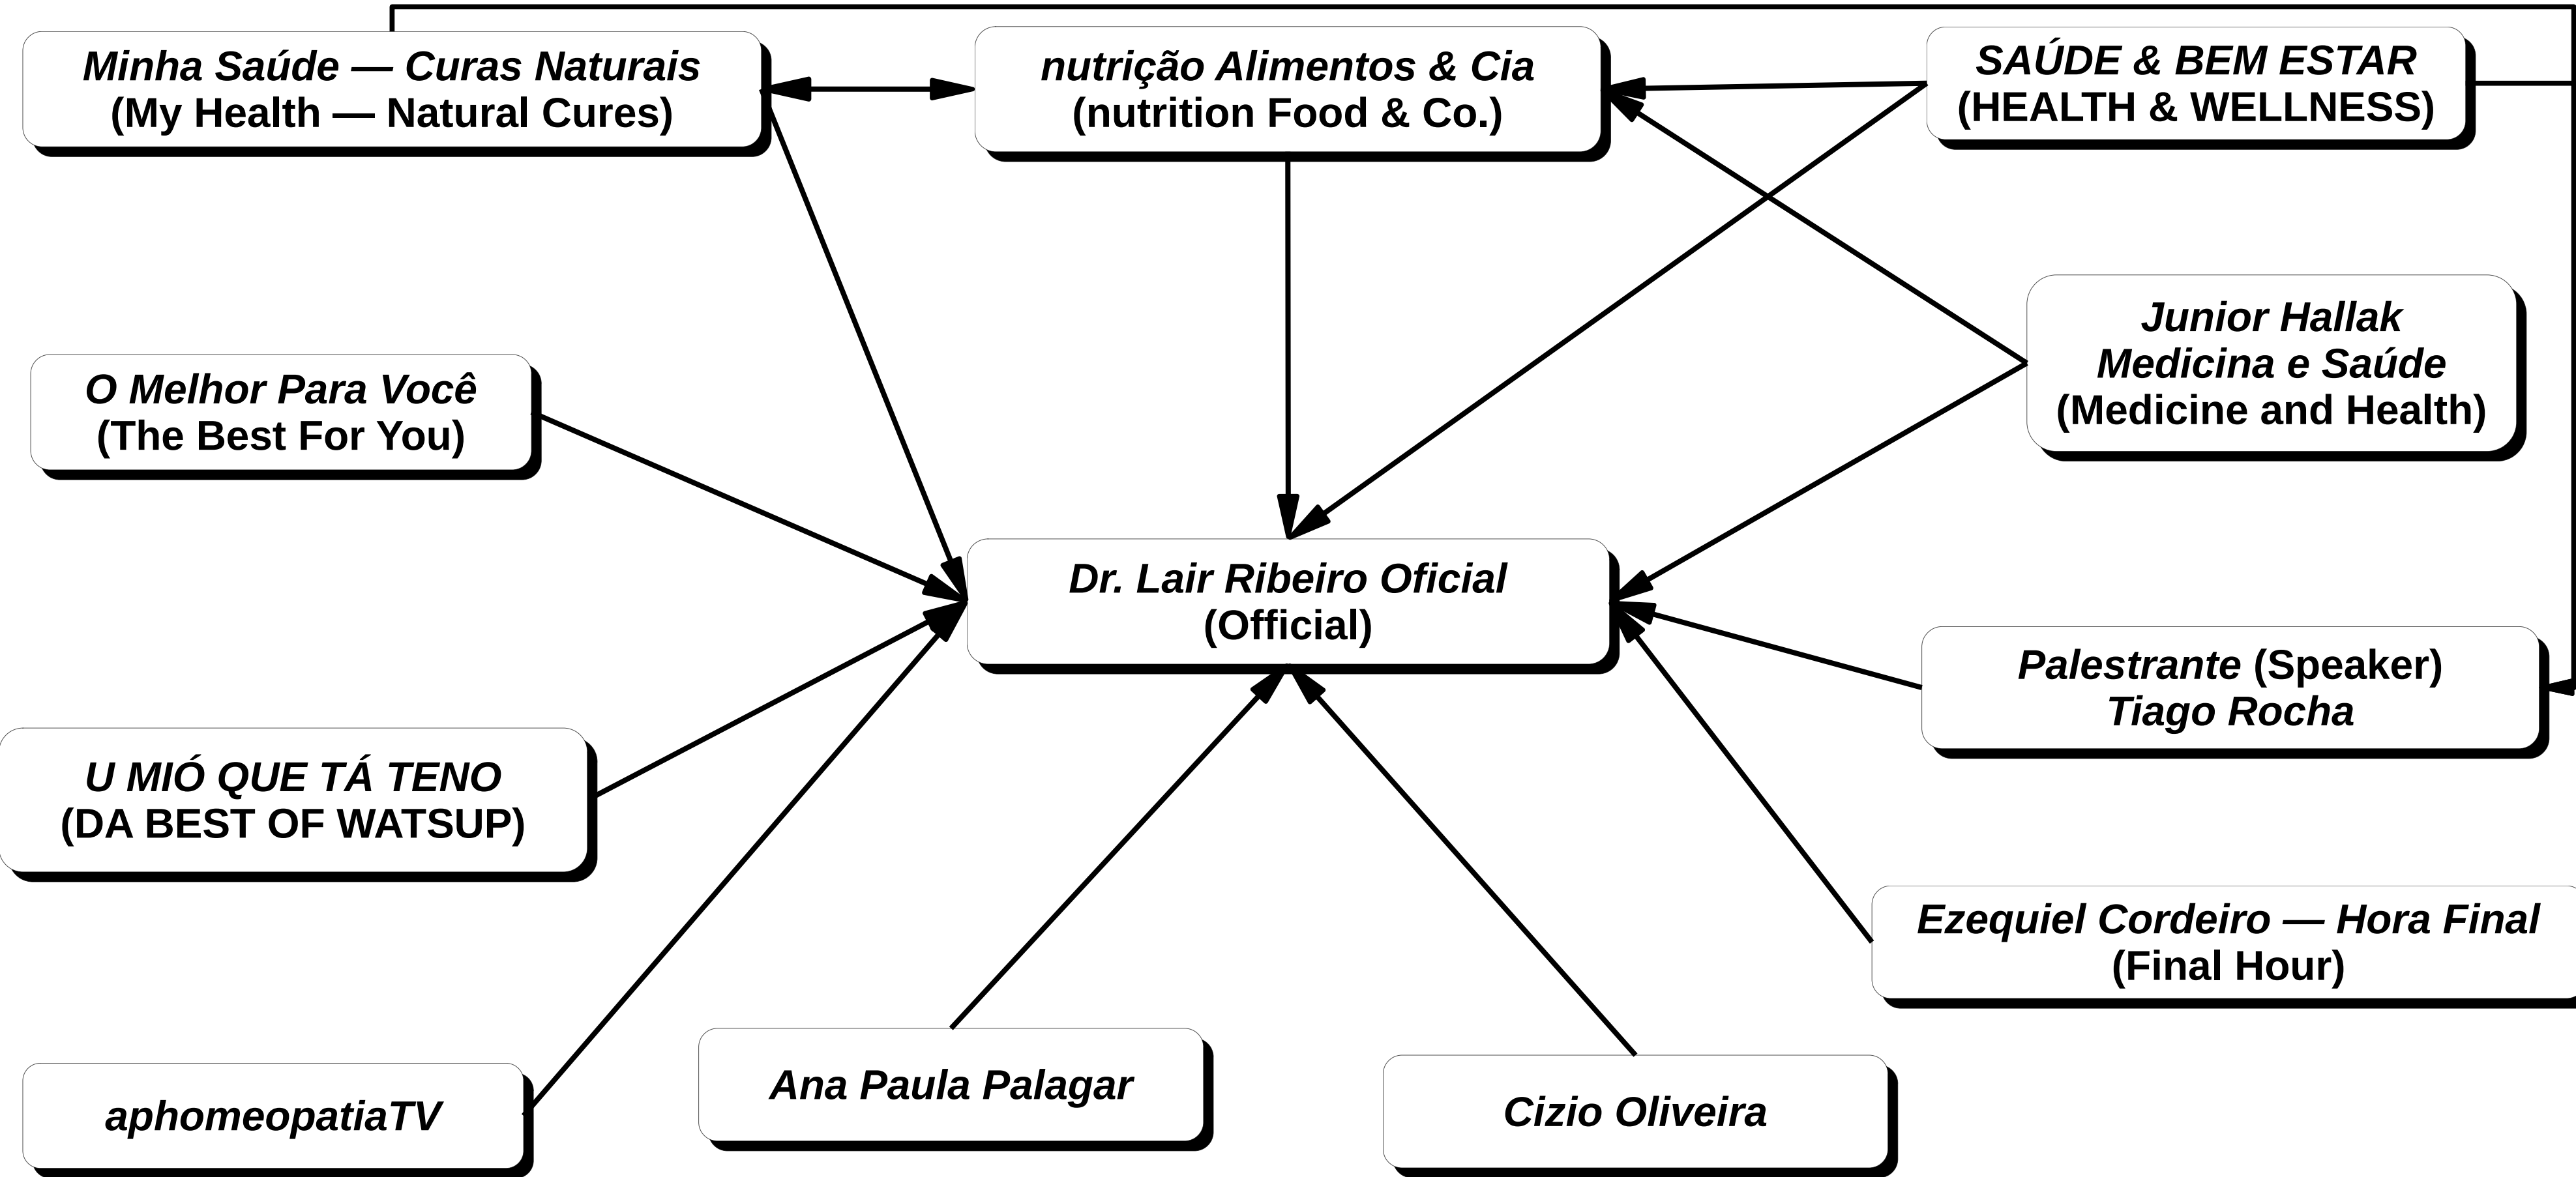

Supplement: Supplementary file 2 [file 25261583]

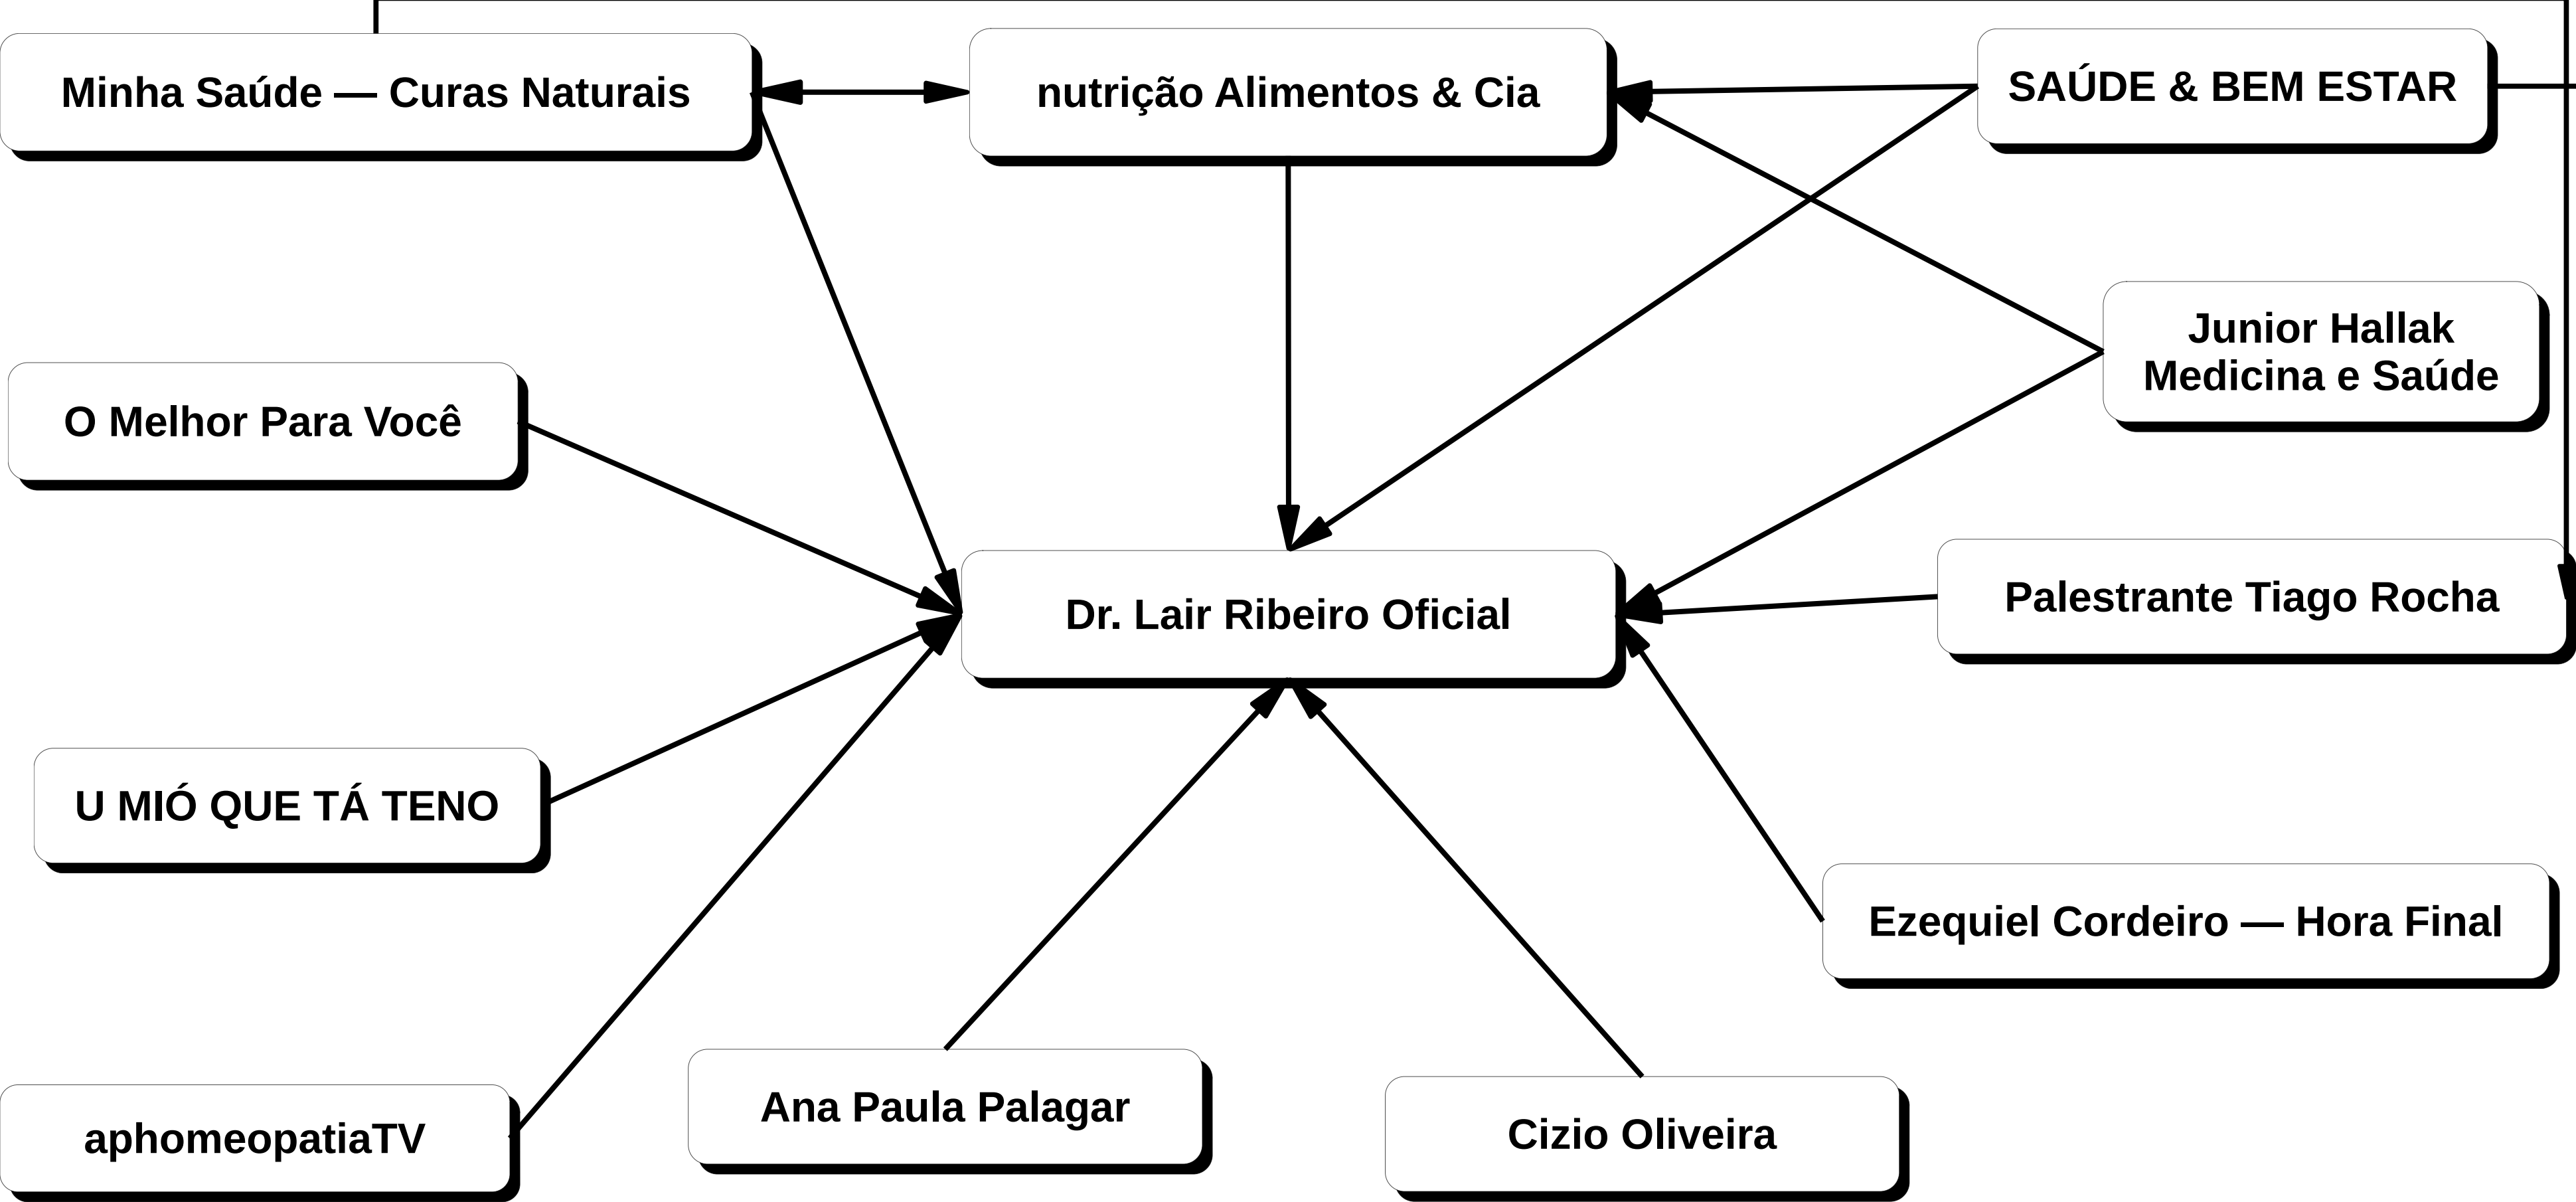

Supplement: Supplementary file 3 [file 25261583]

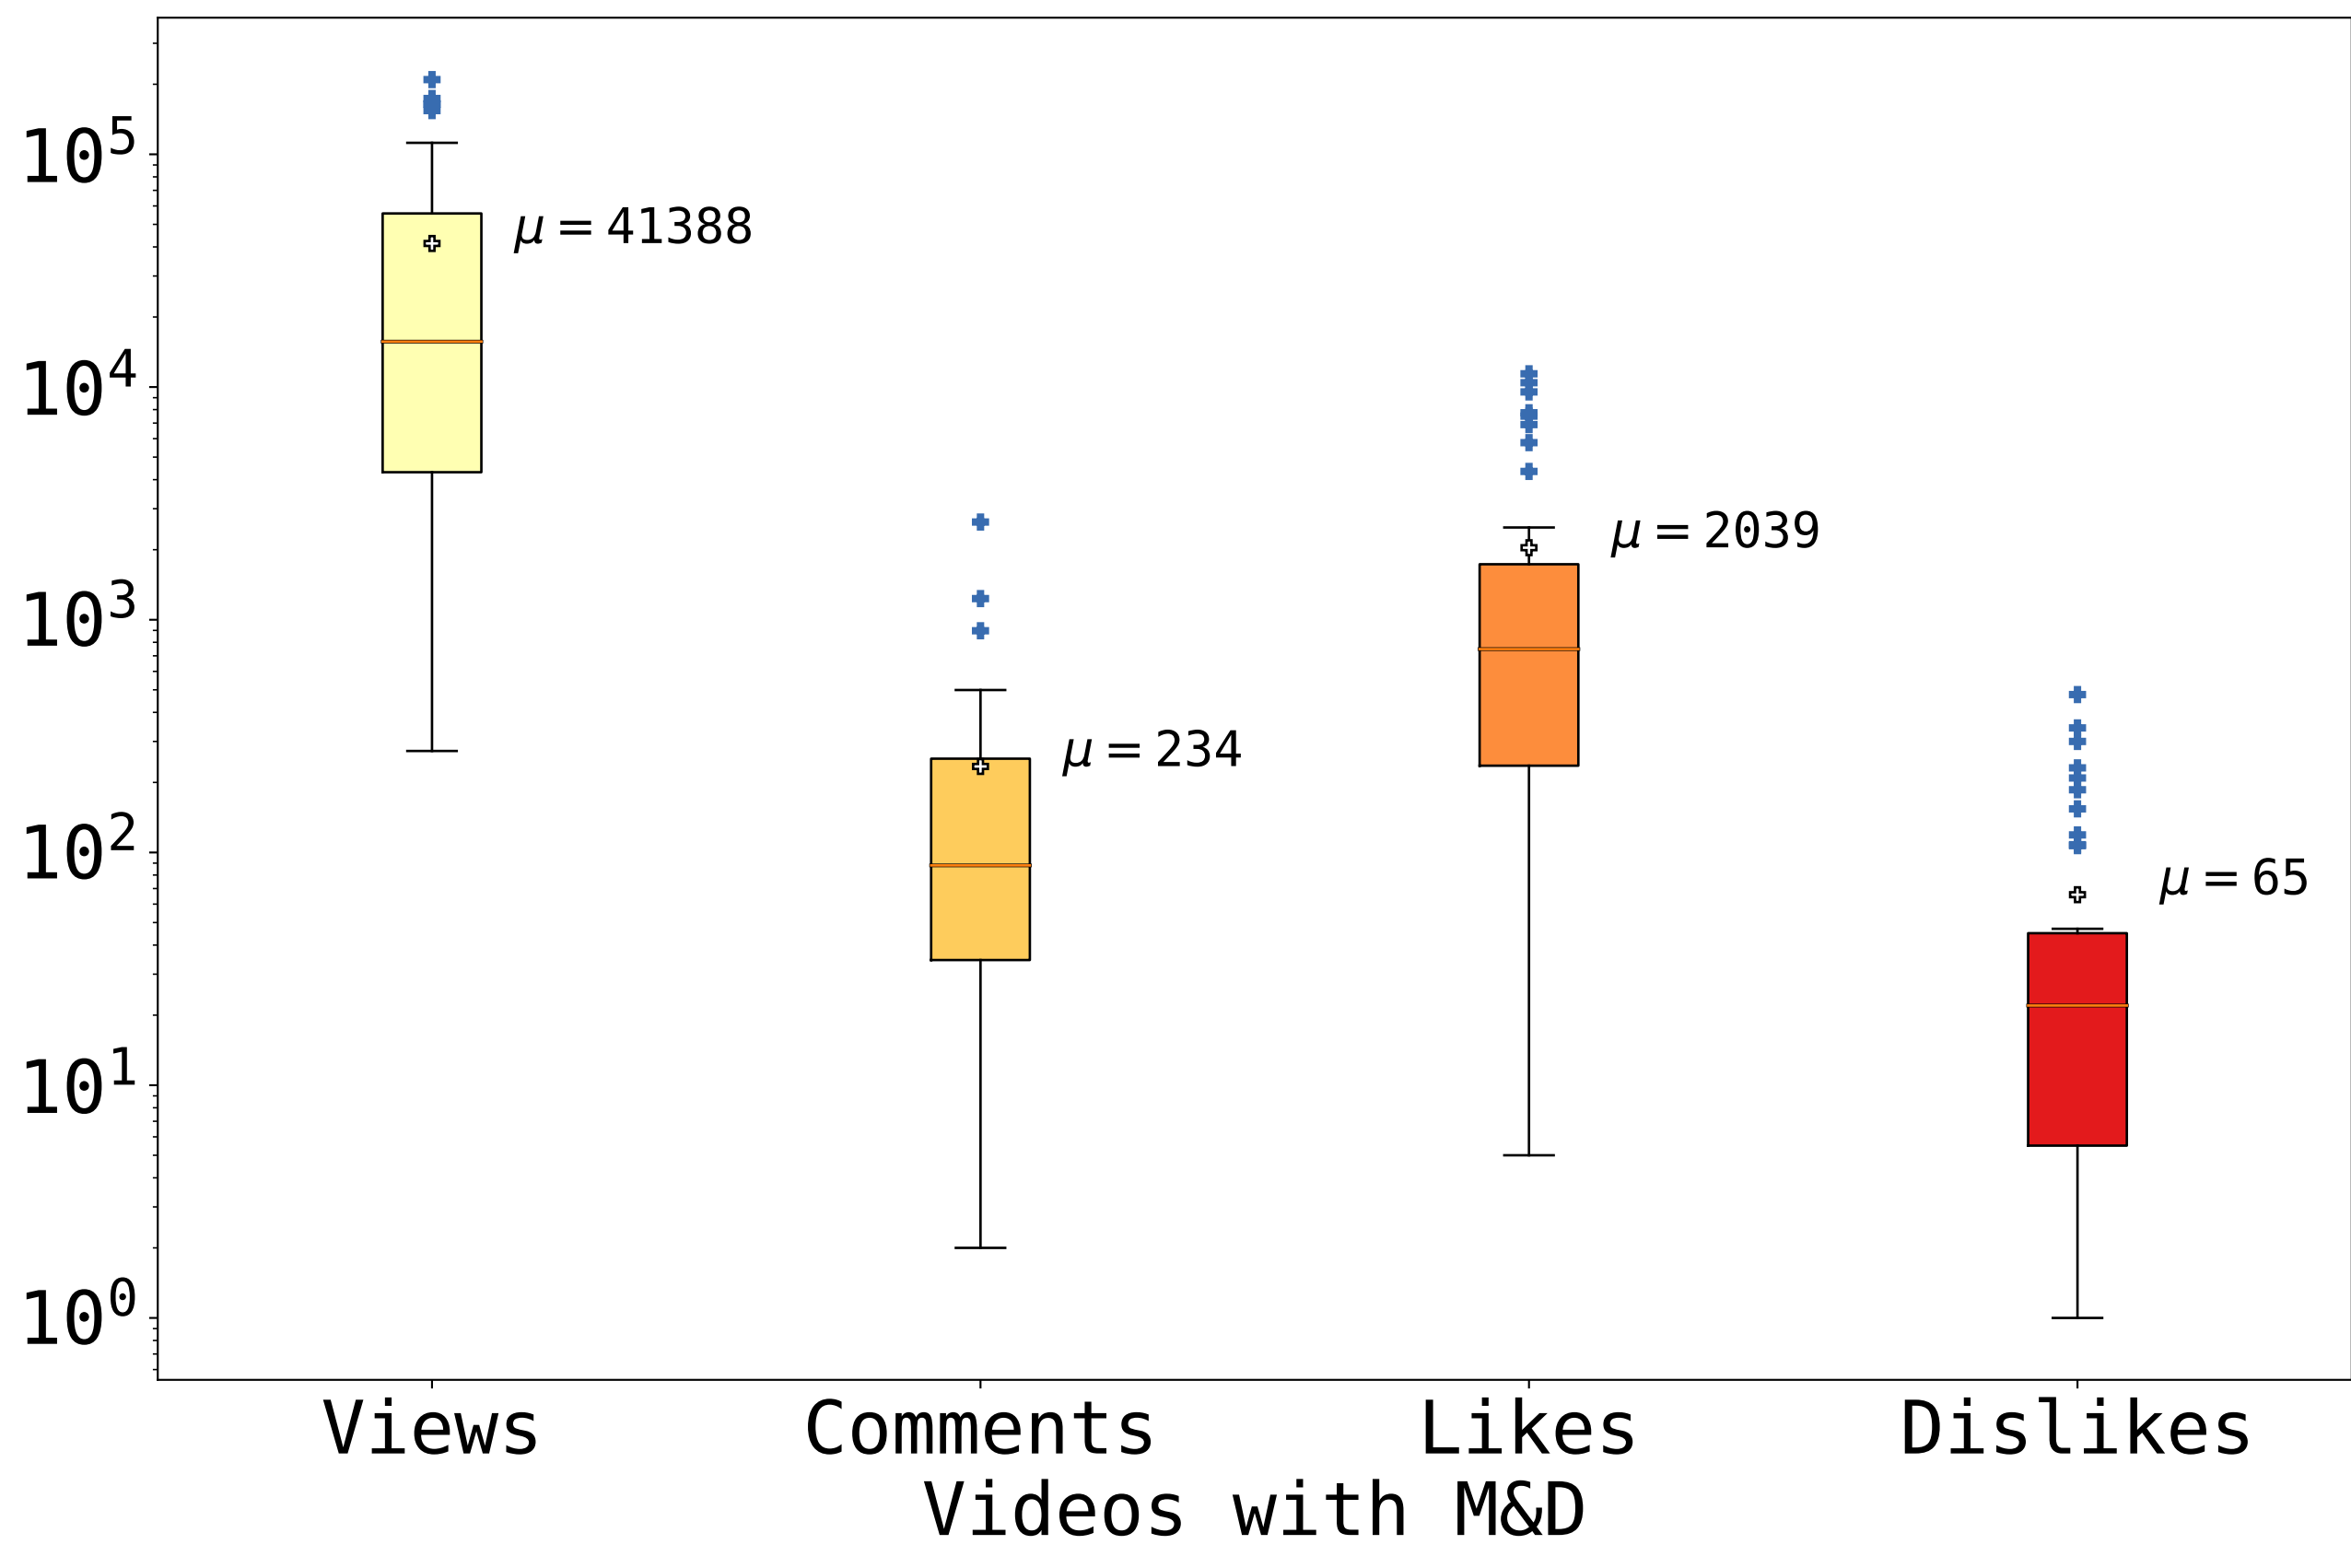

Supplement: Supplementary file 4 [file 25261583]

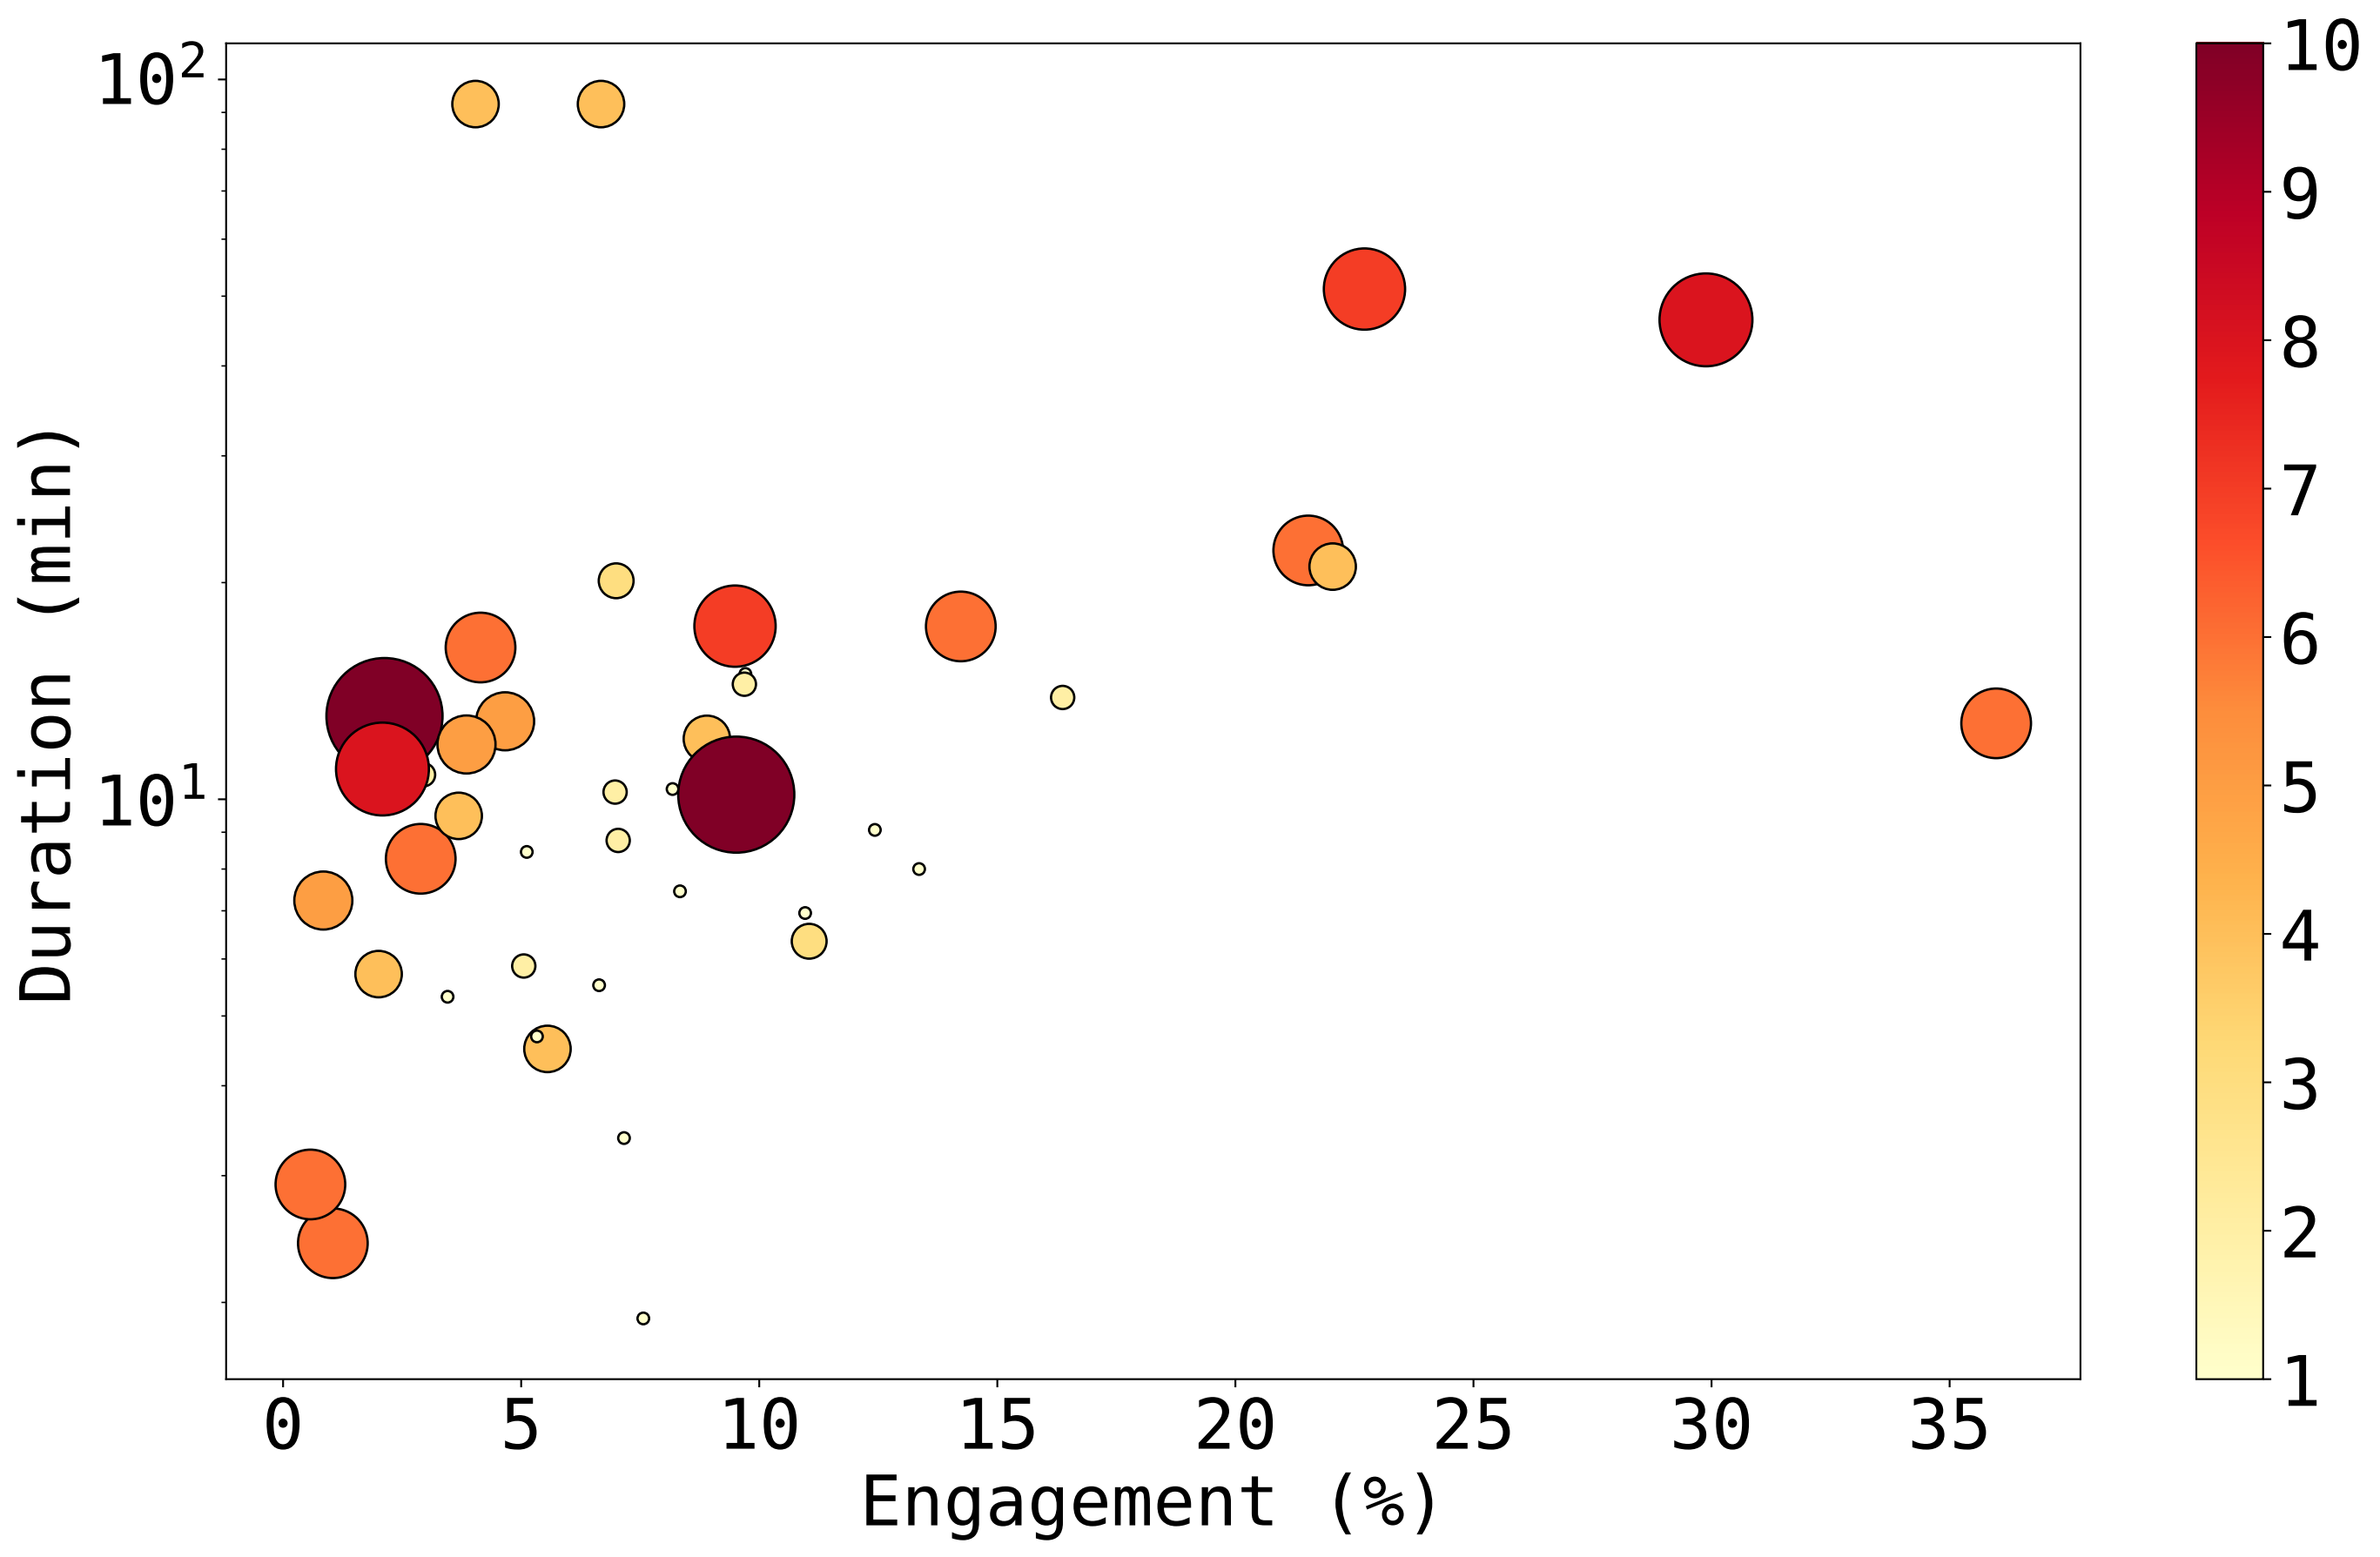

Supplement: Supplementary file 5 [file 25261583 › yt_recommendation/code/figures/Fig_0Y.pdf]

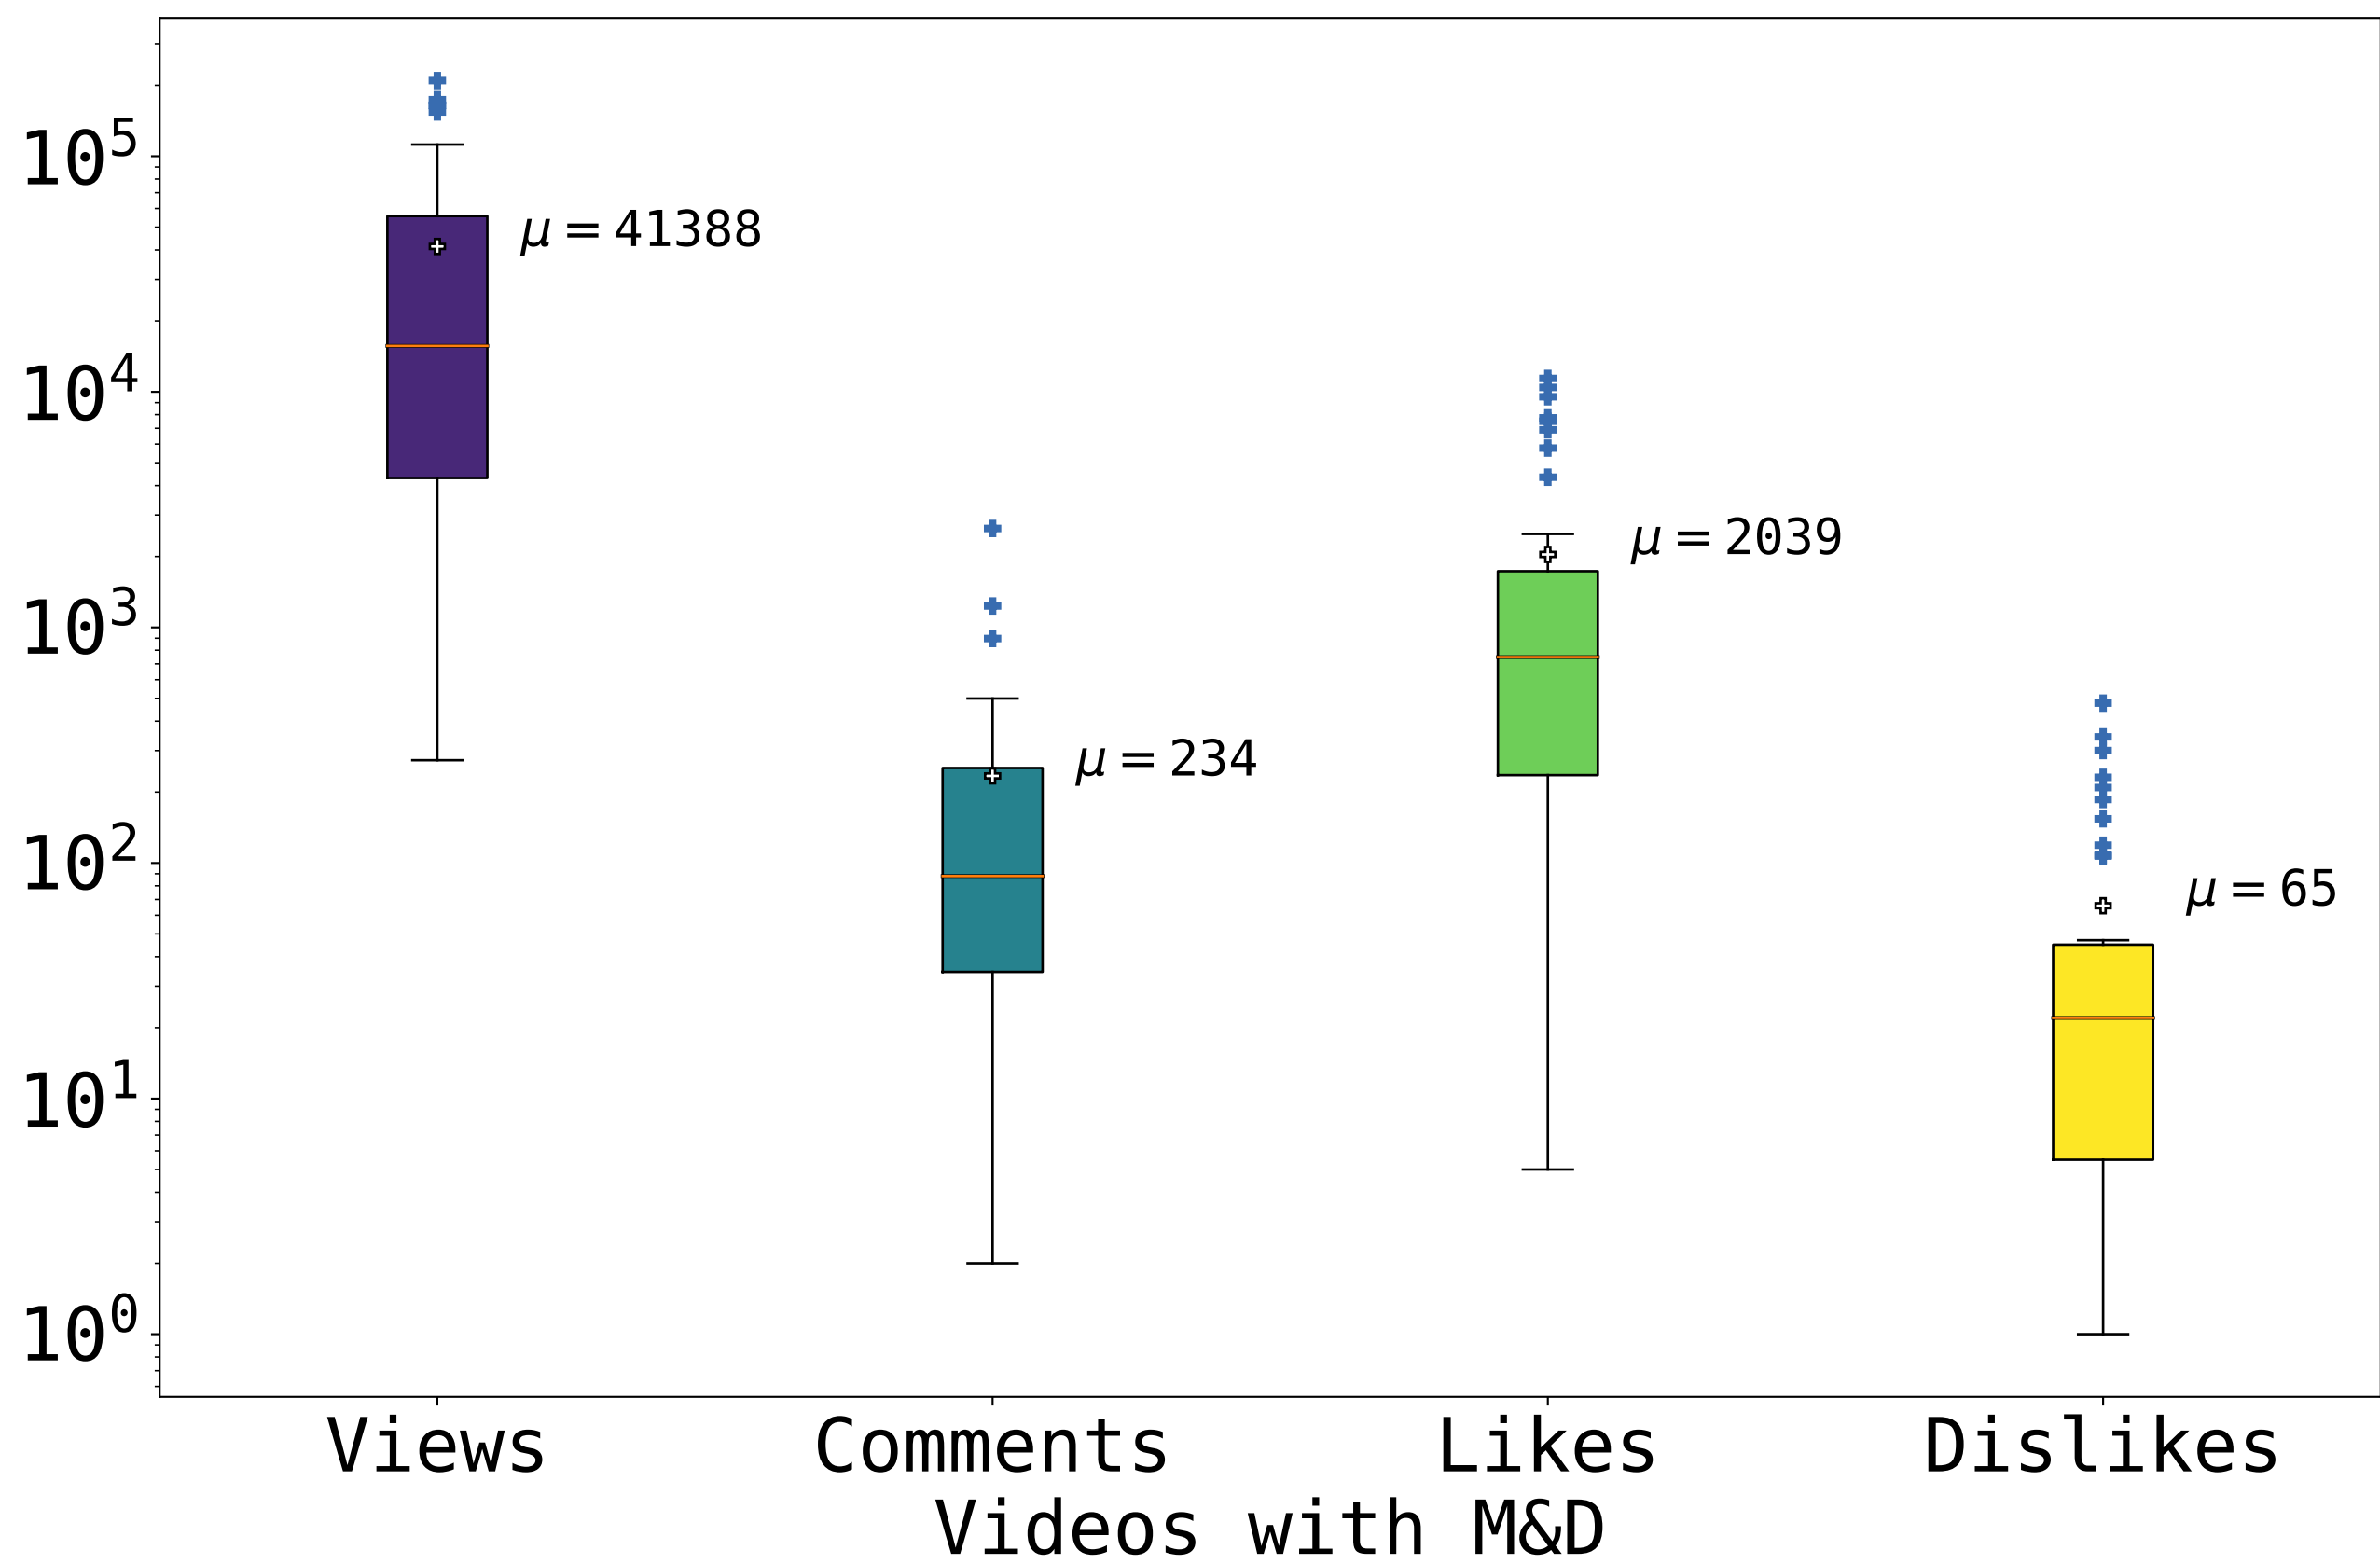

Supplement: Supplementary file 5 [file 25261583 › yt_recommendation/code/figures/Fig_01a.pdf]

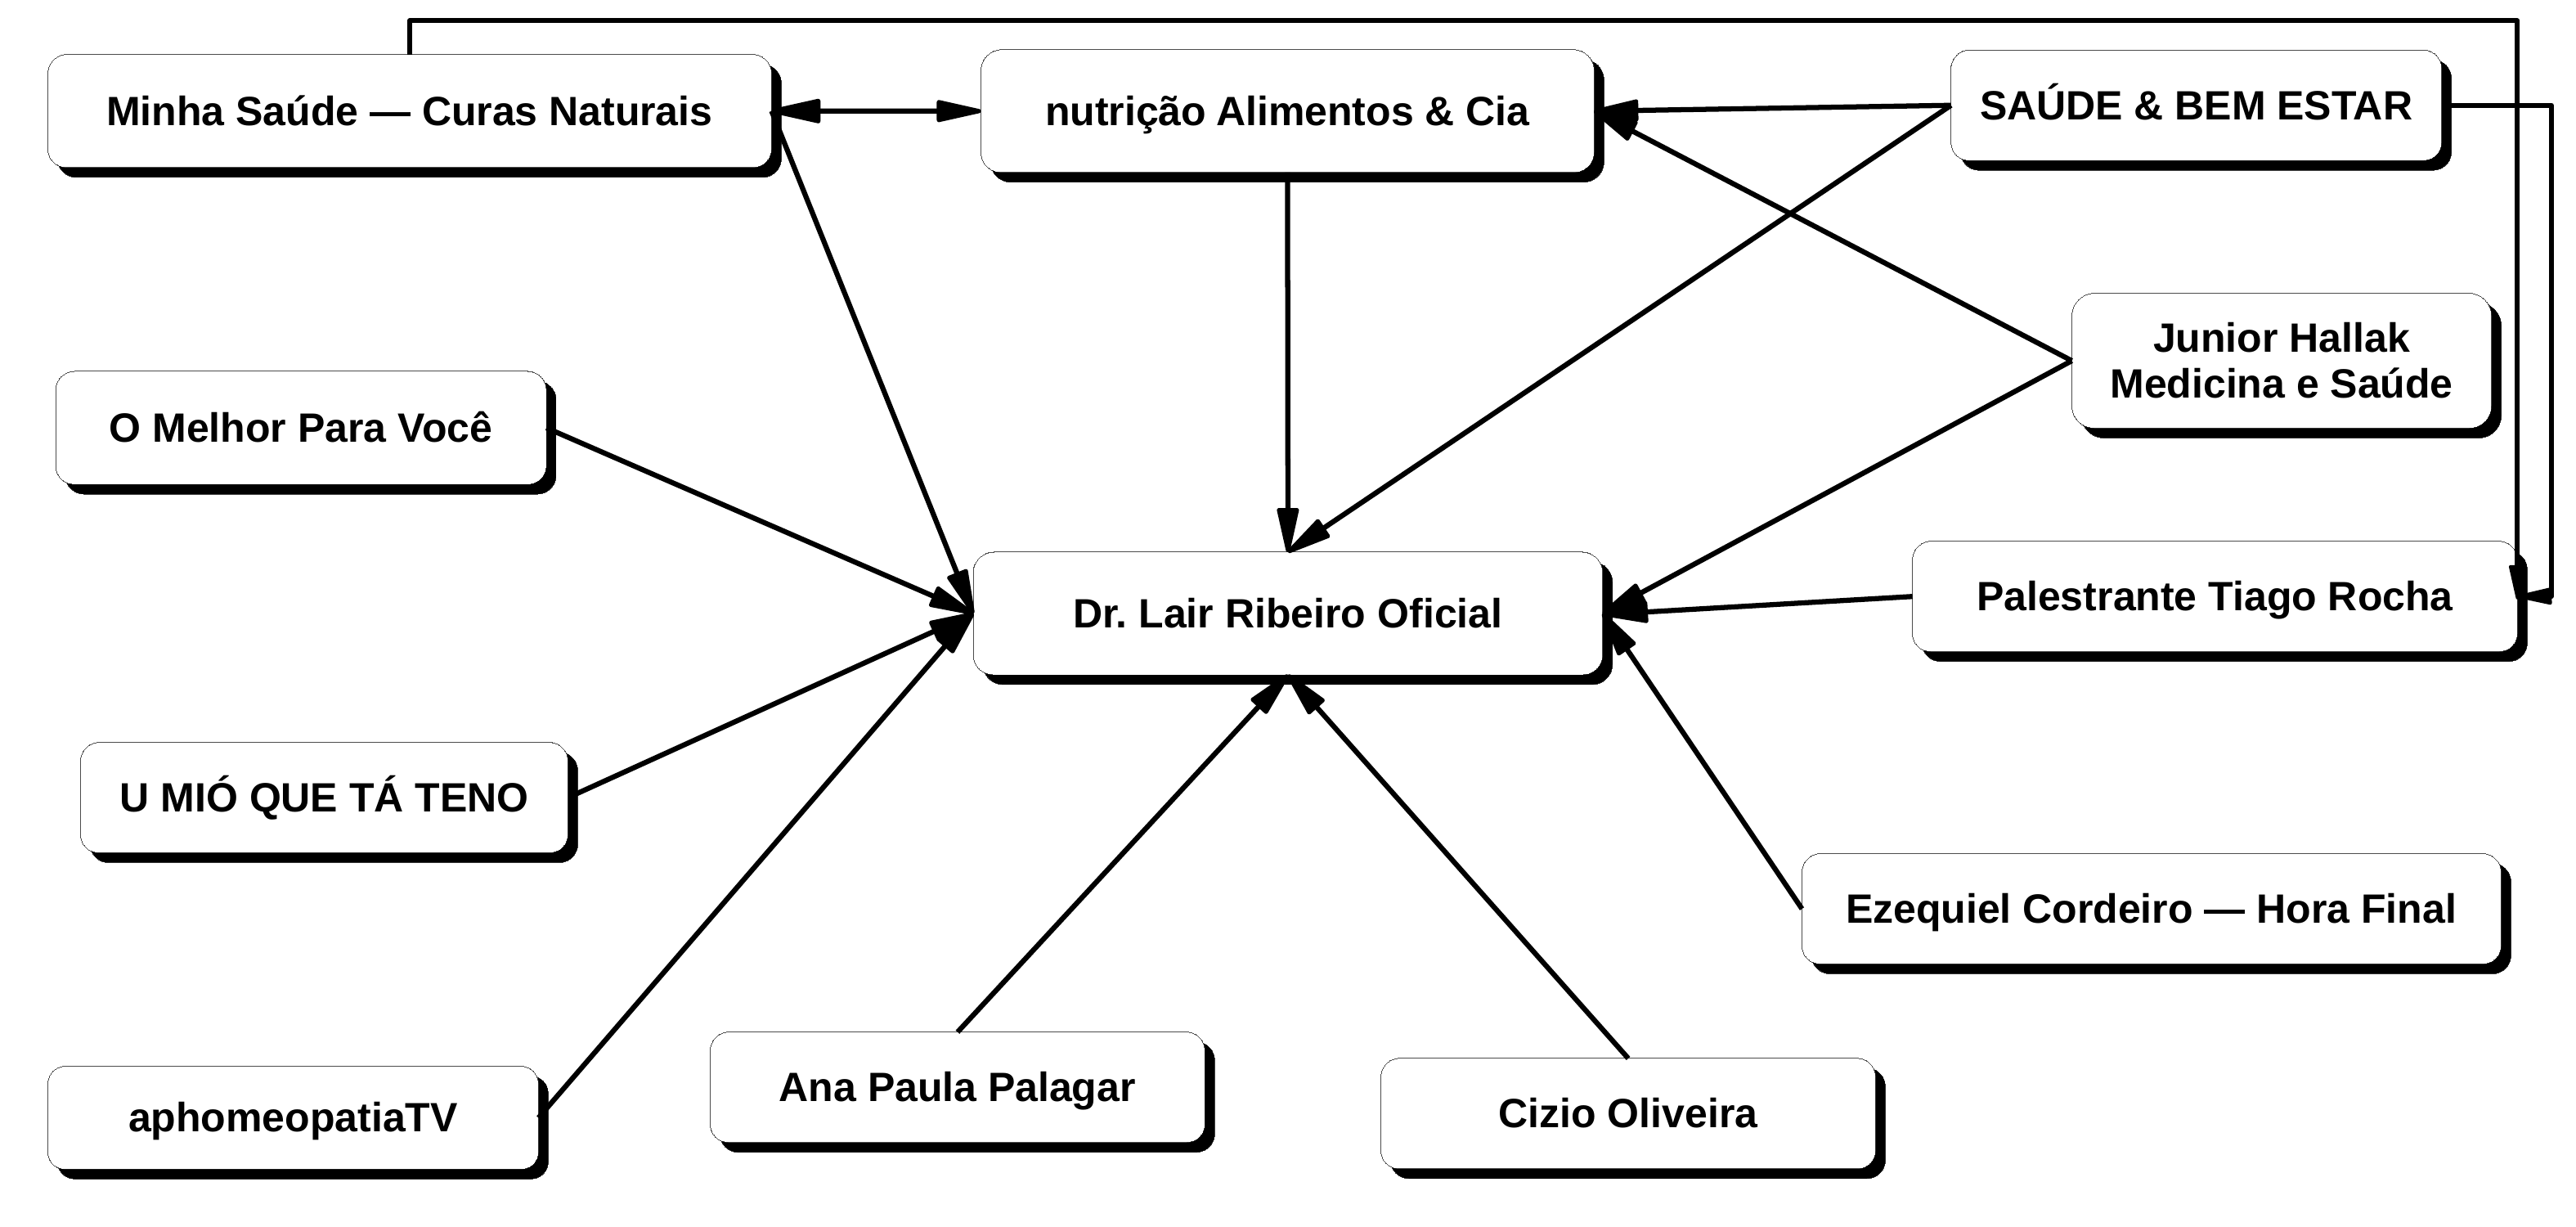

Supplement: Supplementary file 5 [file 25261583 › yt_recommendation/code/figures/Fig_02v1.png]

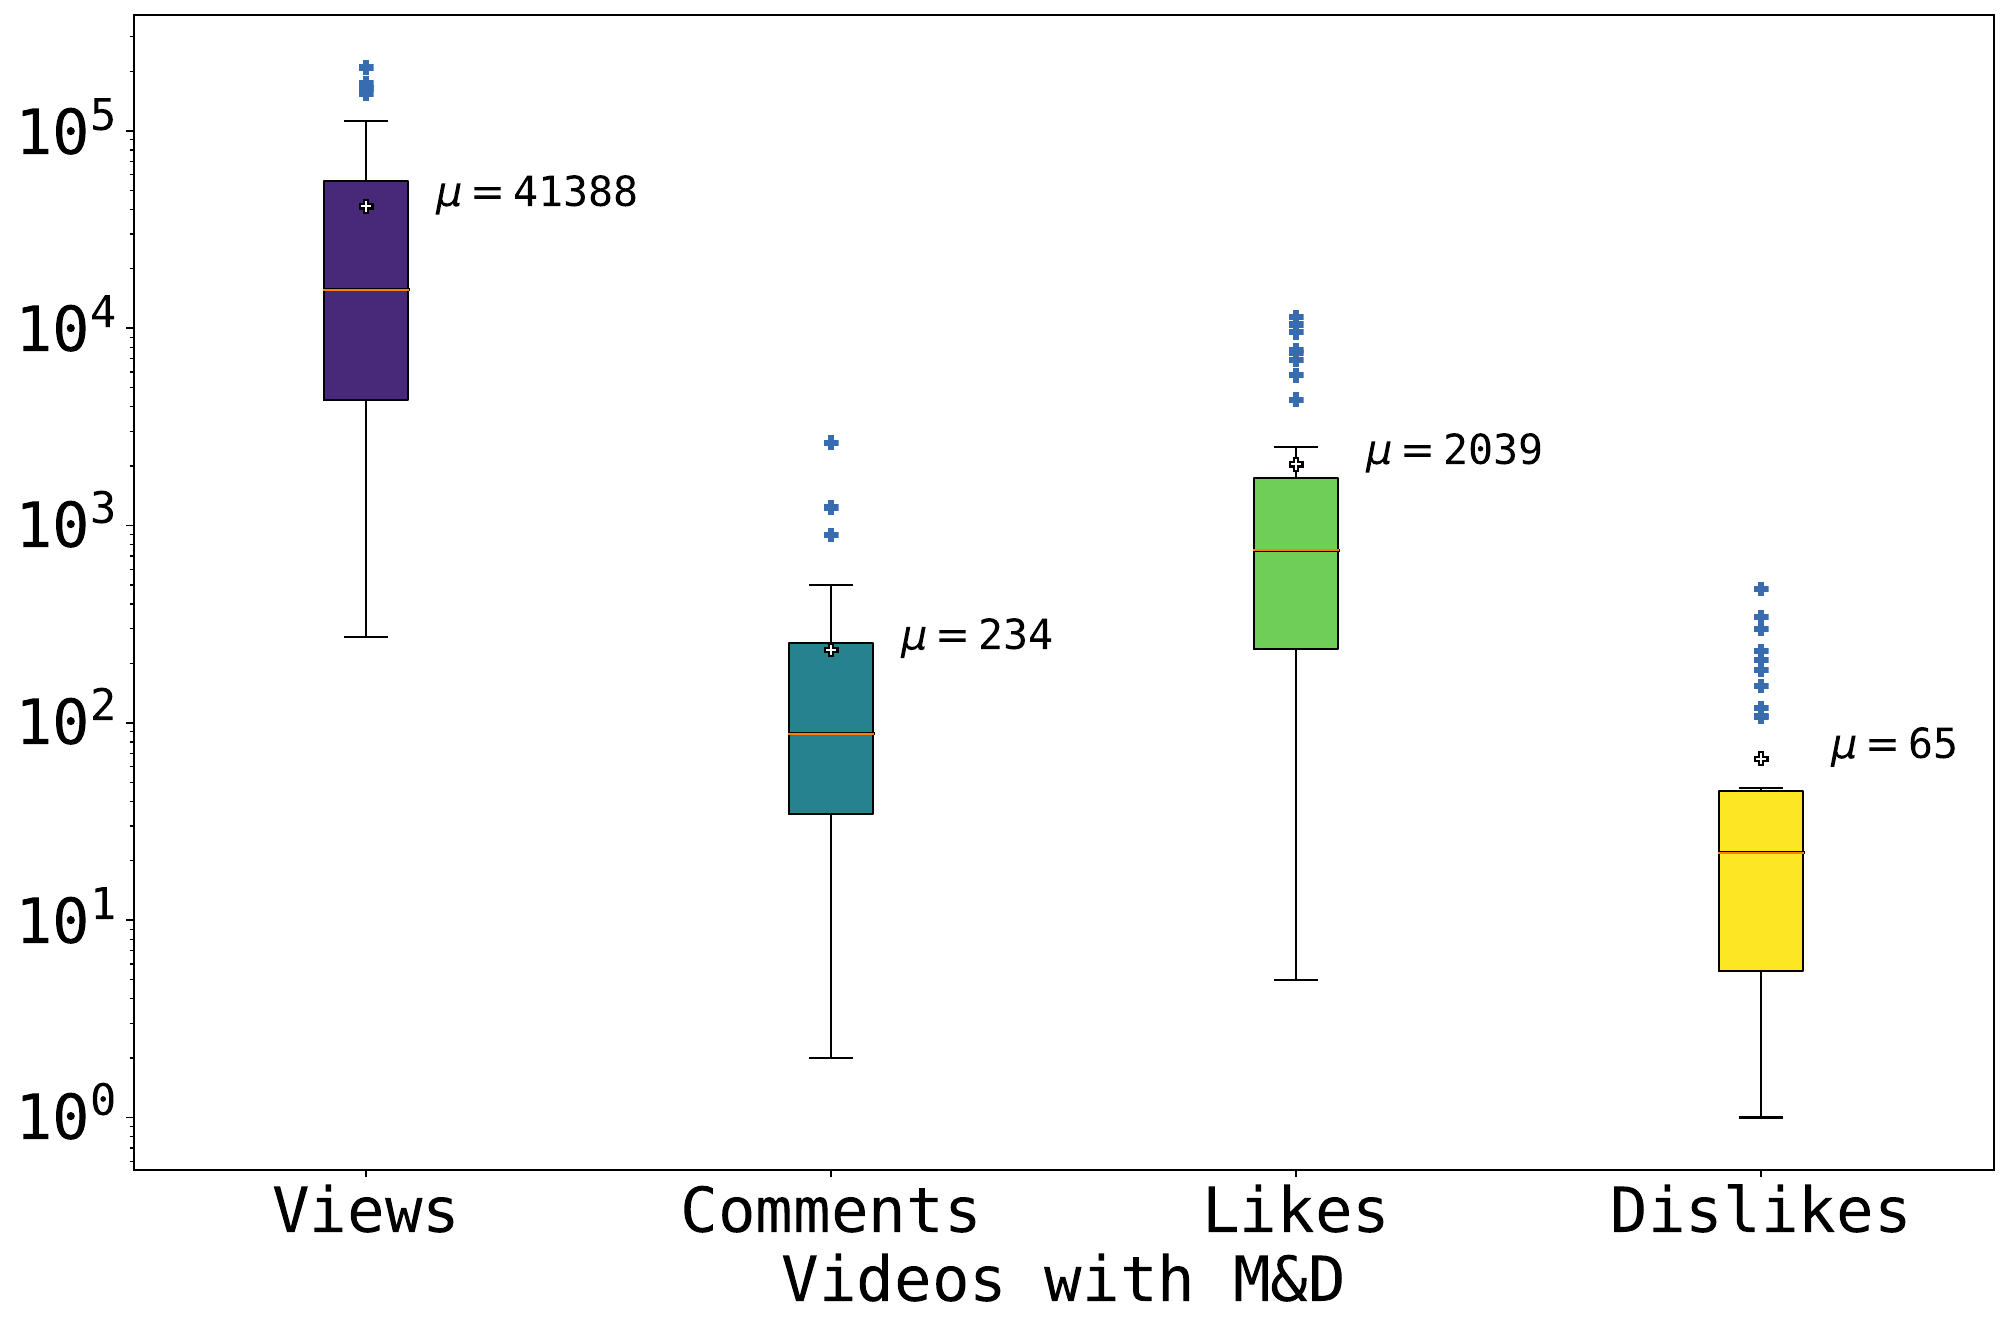

Supplement: Supplementary file 5 [file 25261583 › yt_recommendation/code/figures/Fig_01a.png]

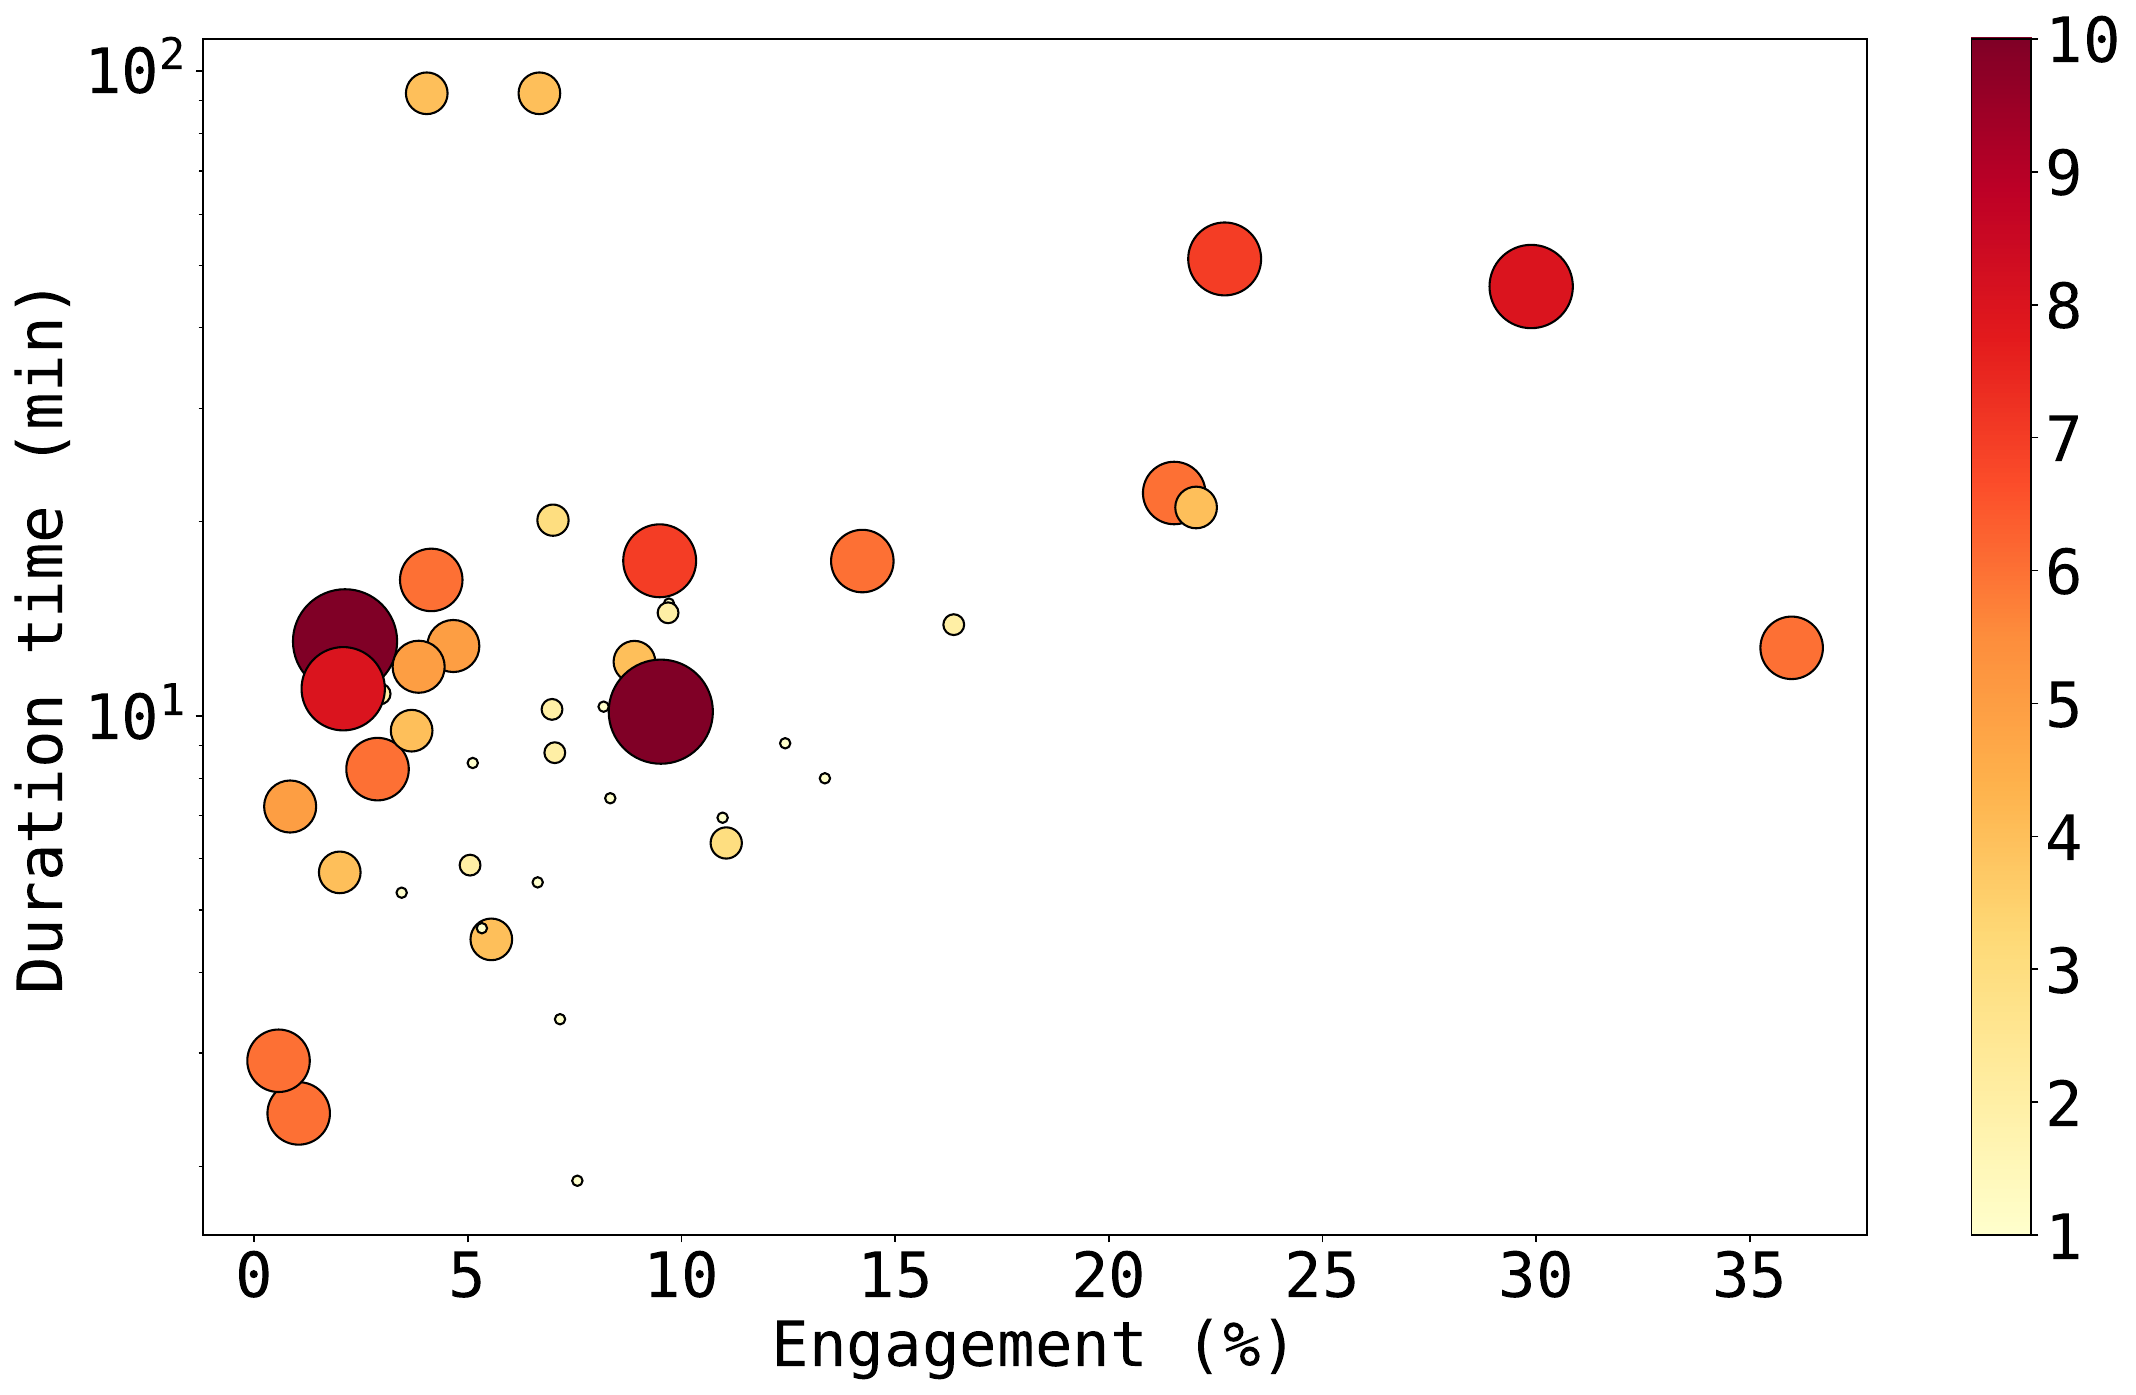

Supplement: Supplementary file 5 [file 25261583 › yt_recommendation/code/figures/Fig_01b.png]

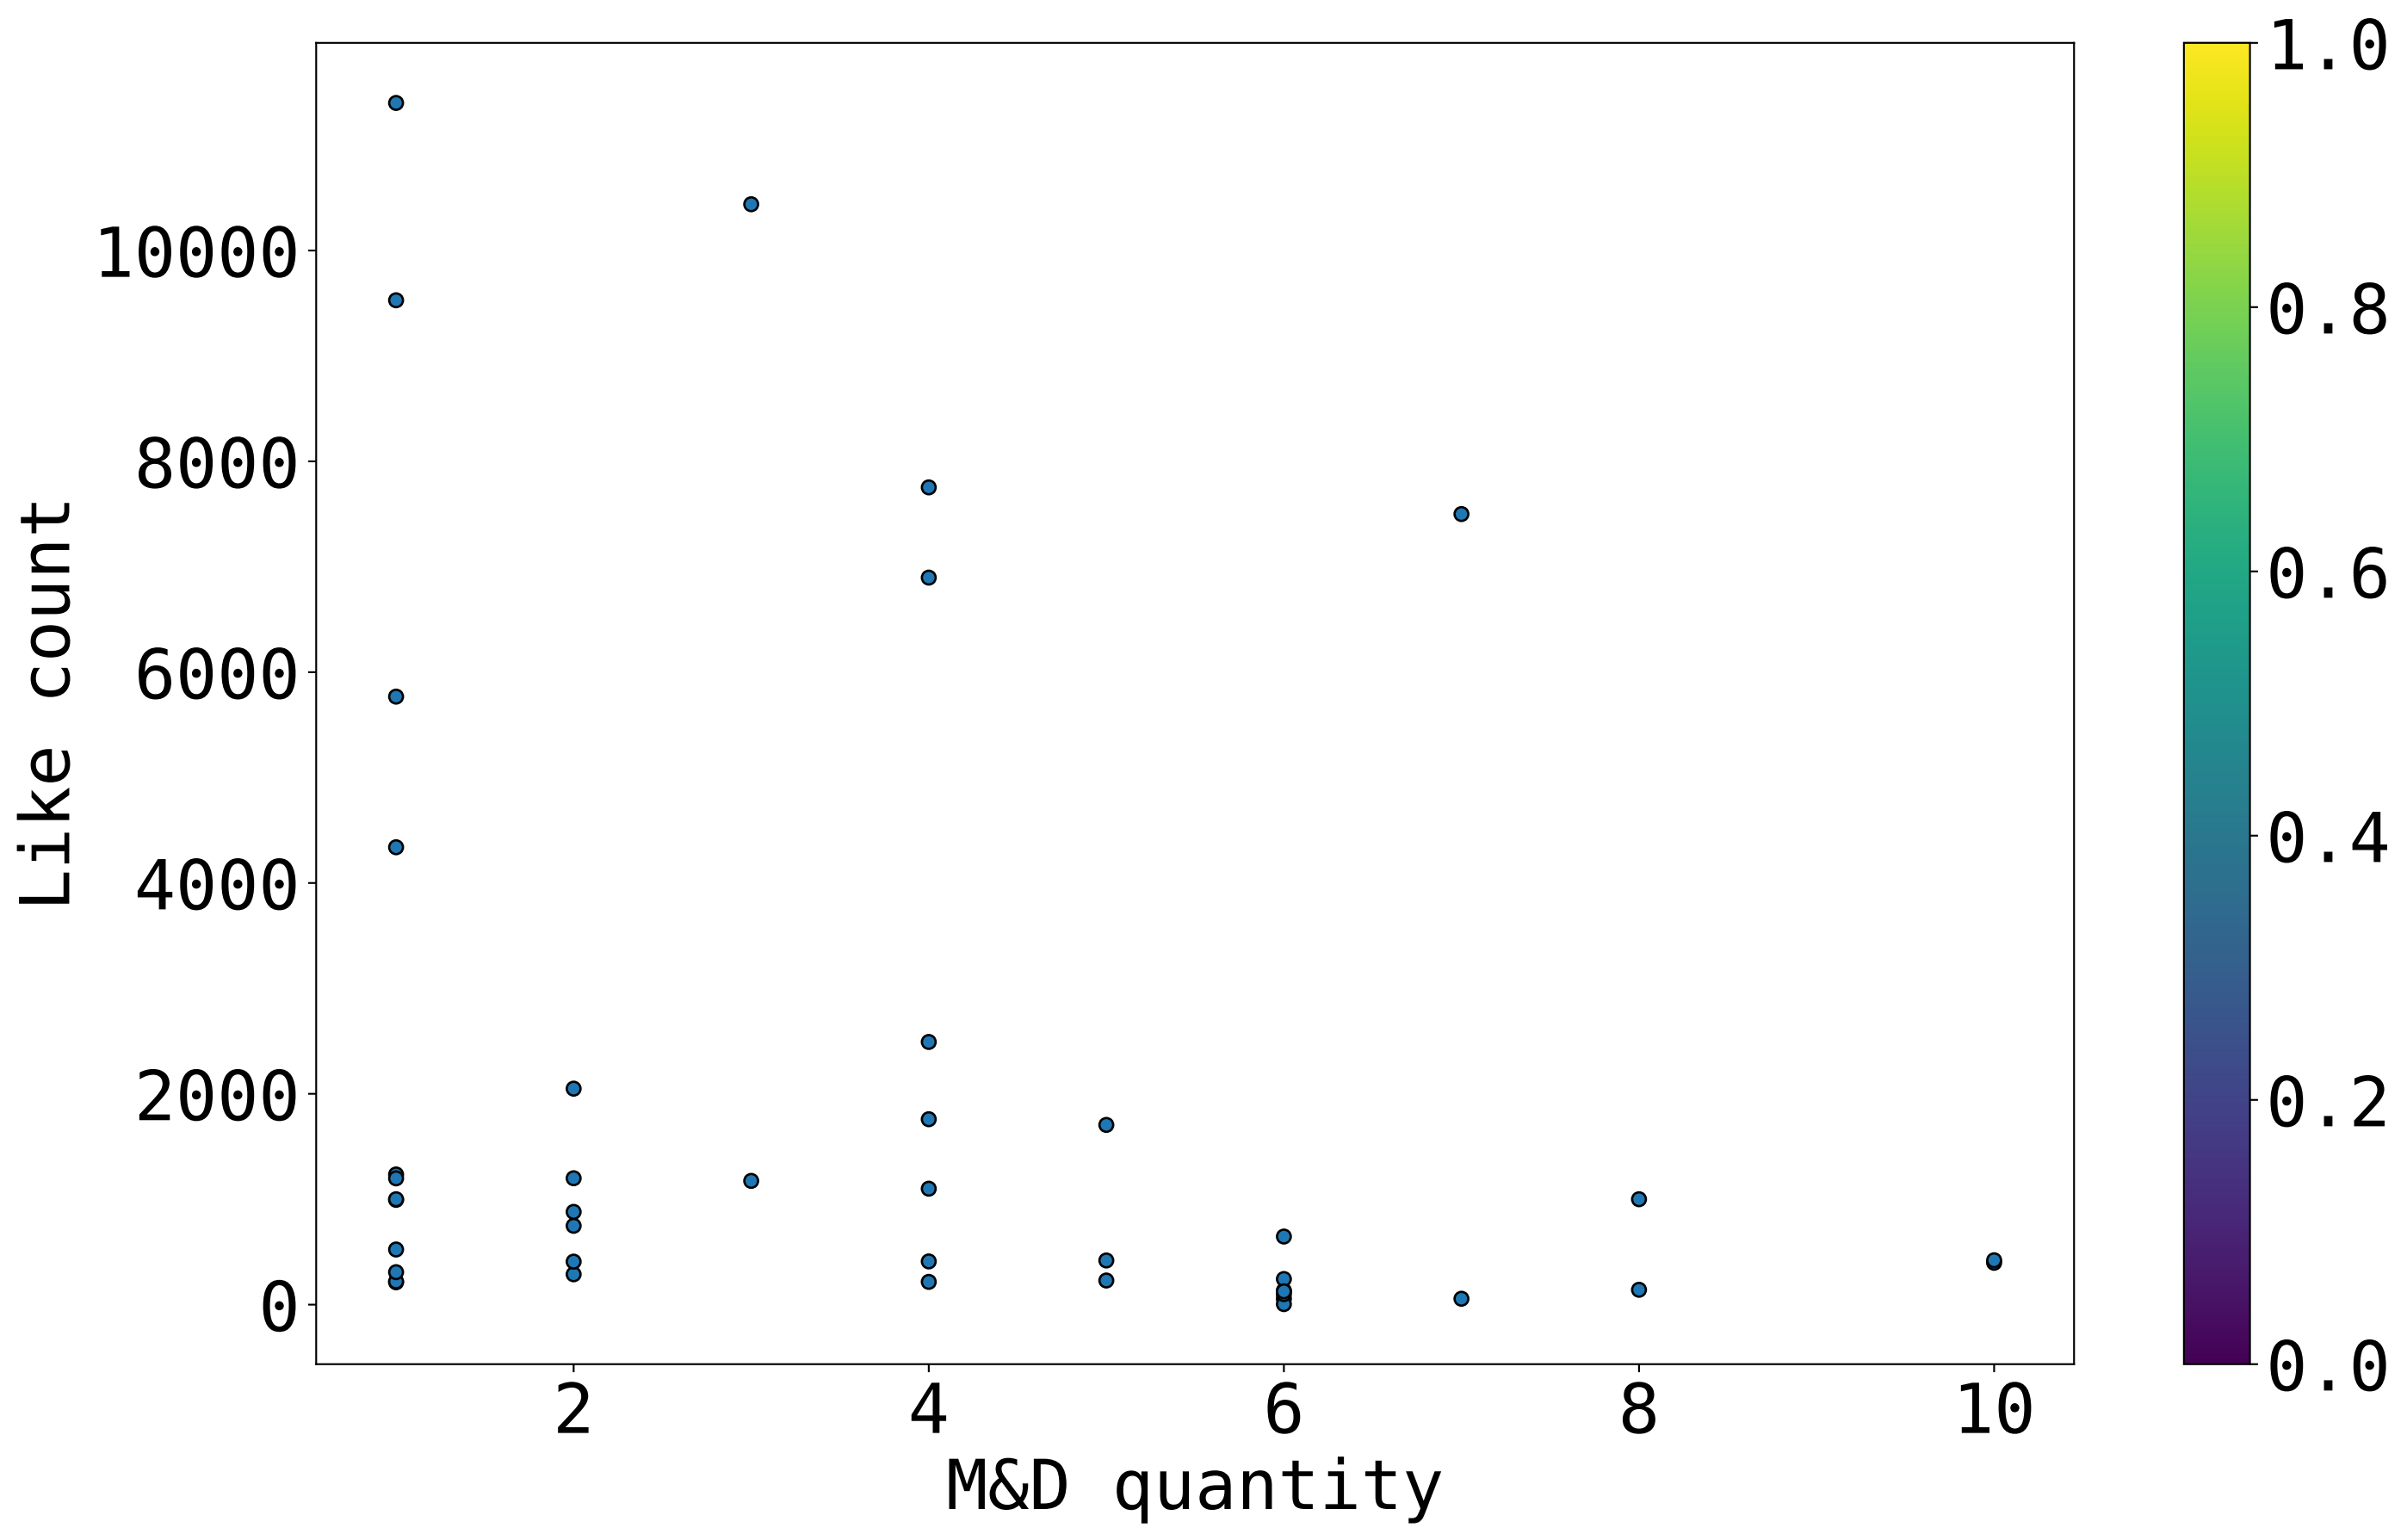

Supplement: Supplementary file 5 [file 25261583 › yt_recommendation/code/figures/Fig_0Za.pdf]

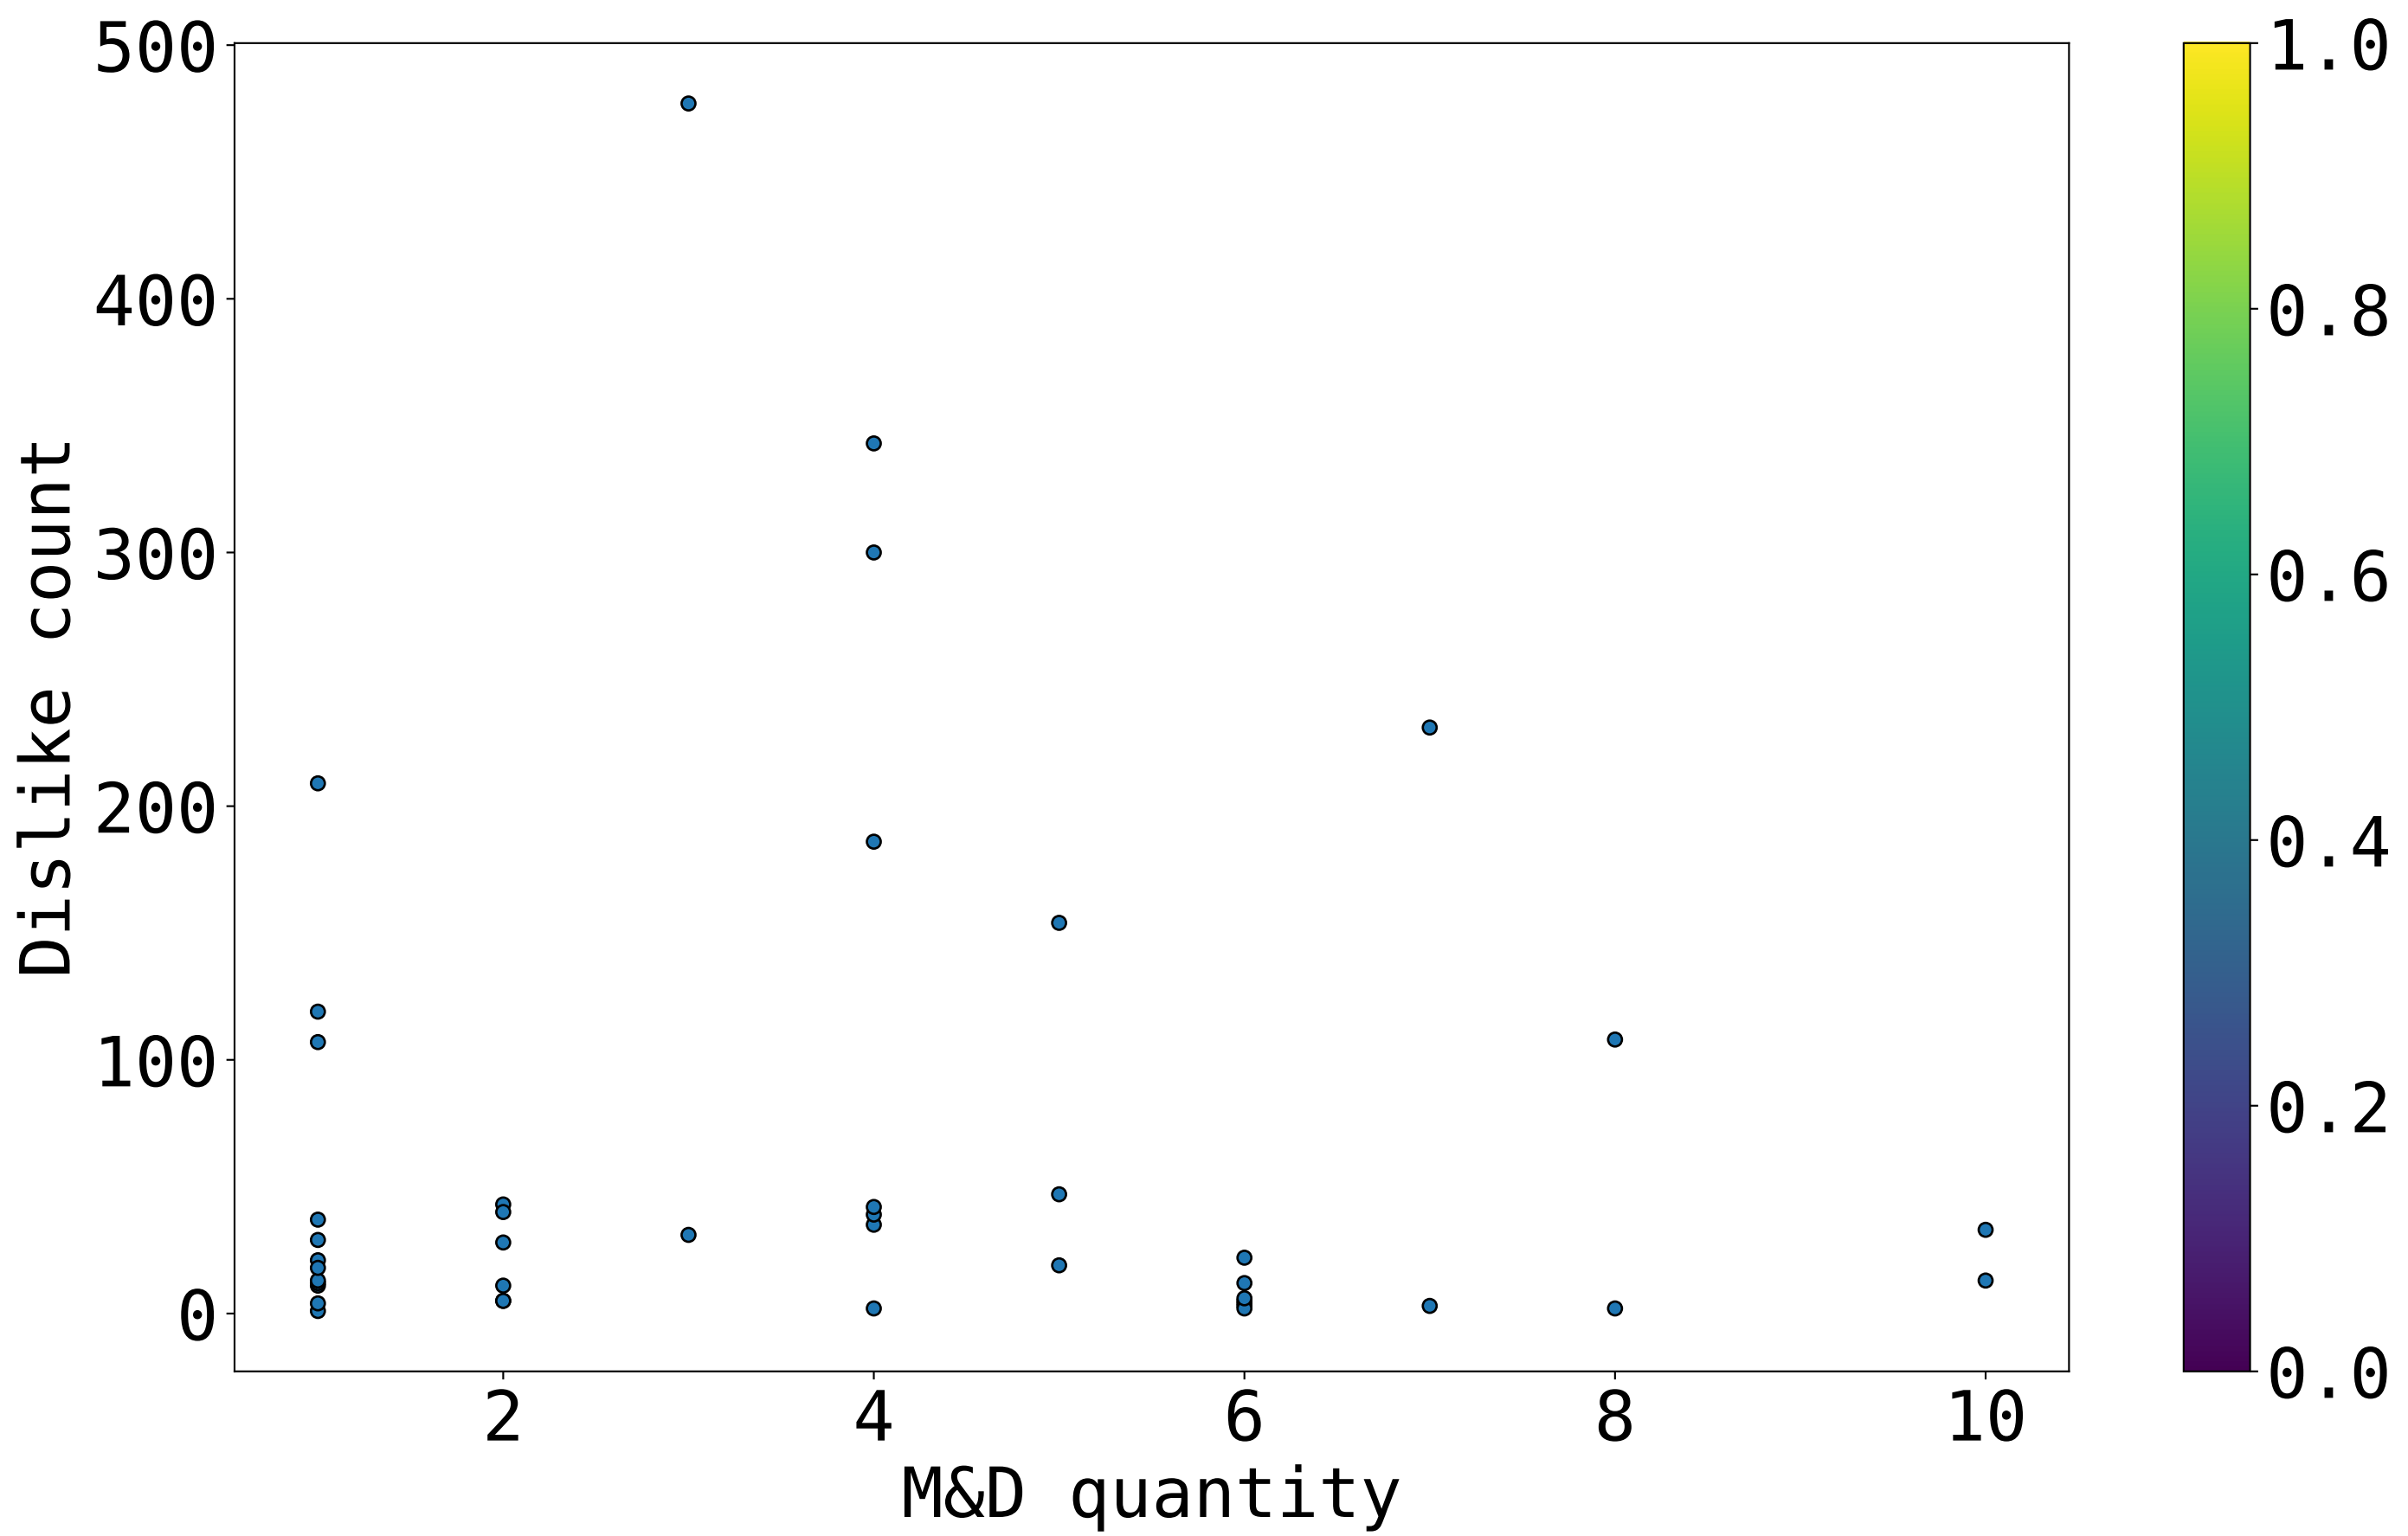

Supplement: Supplementary file 5 [file 25261583 › yt_recommendation/code/figures/Fig_0Zb.pdf]

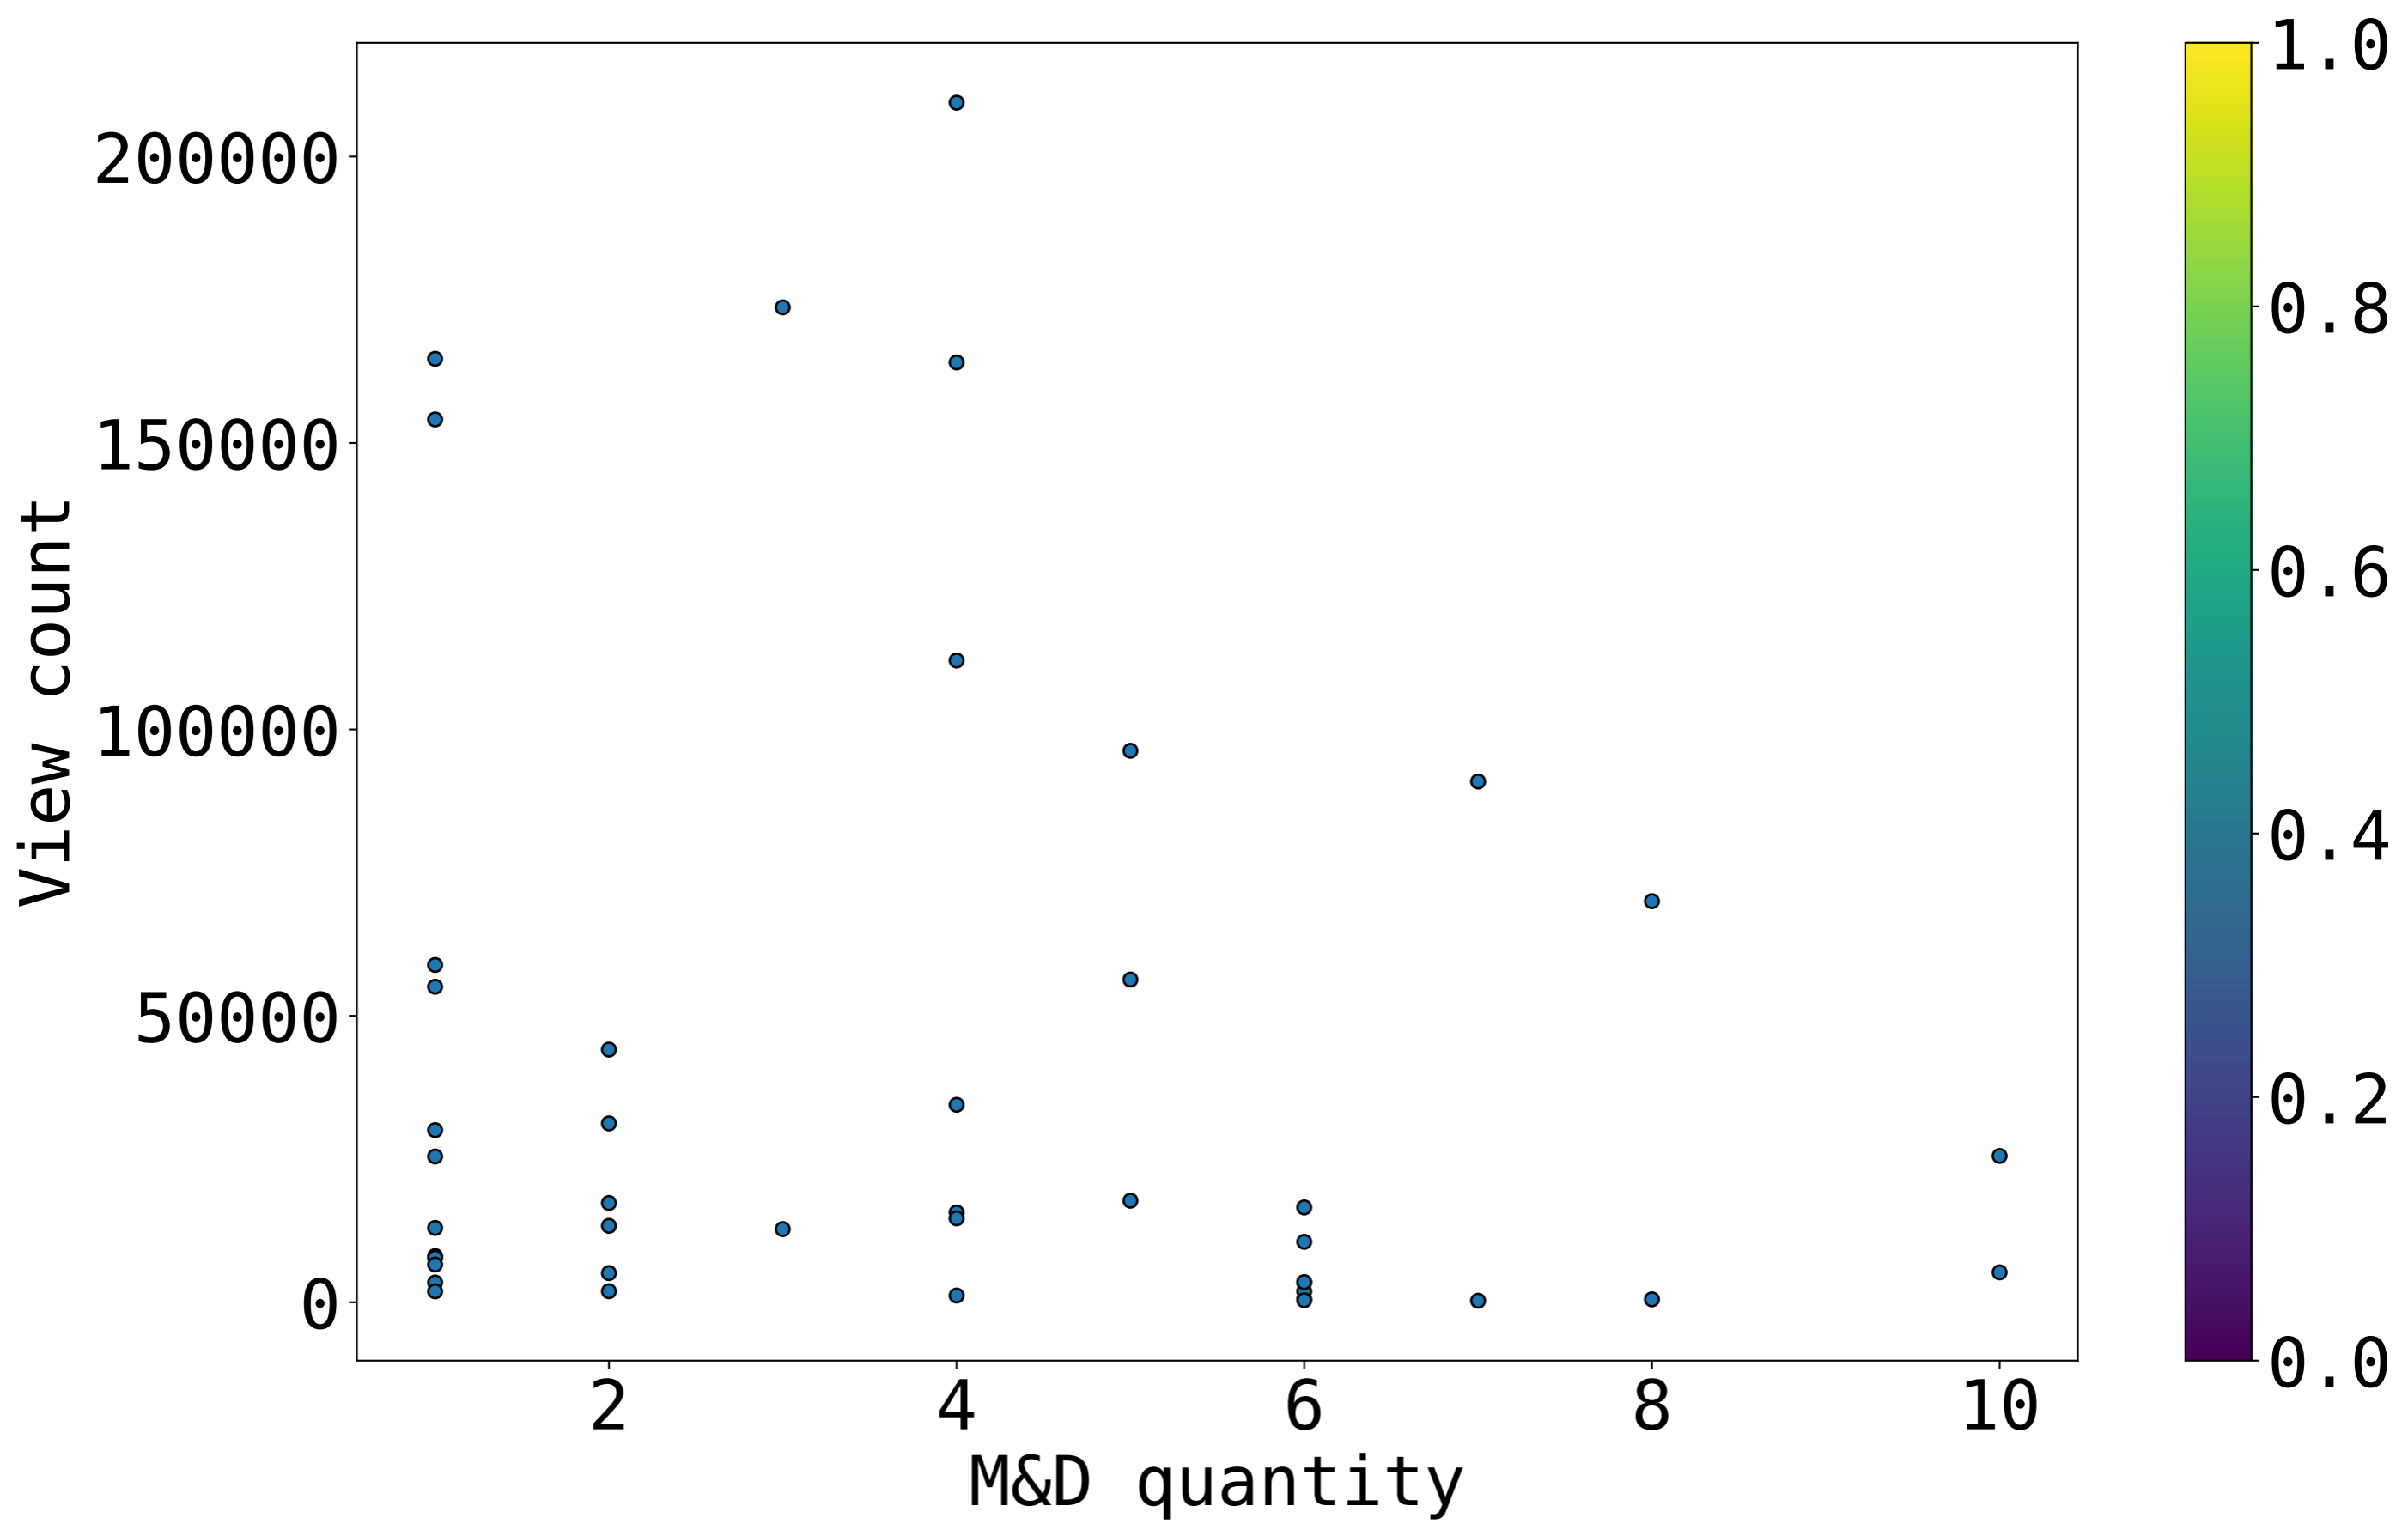

Supplement: Supplementary file 5 [file 25261583 › yt_recommendation/code/figures/Fig_0Zc.pdf]

(a)
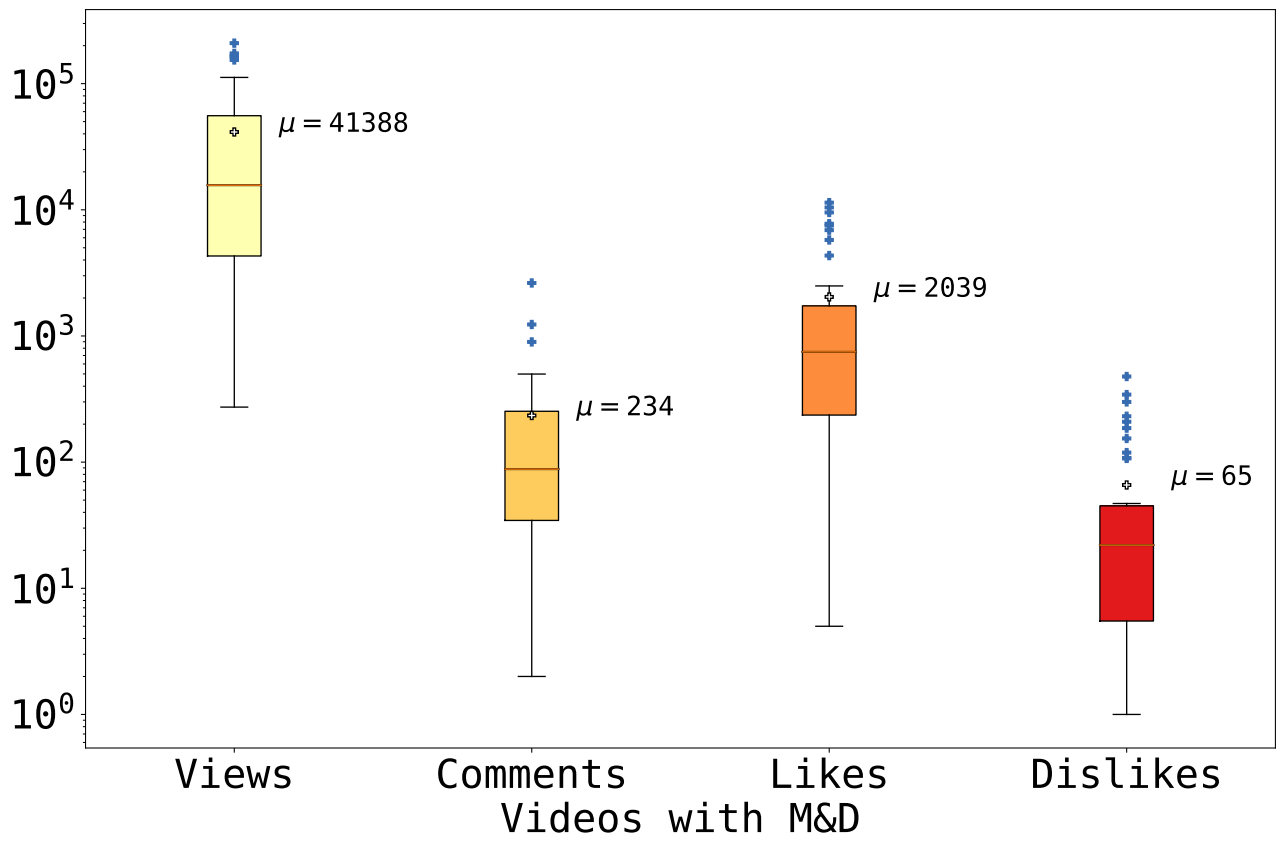
(b)
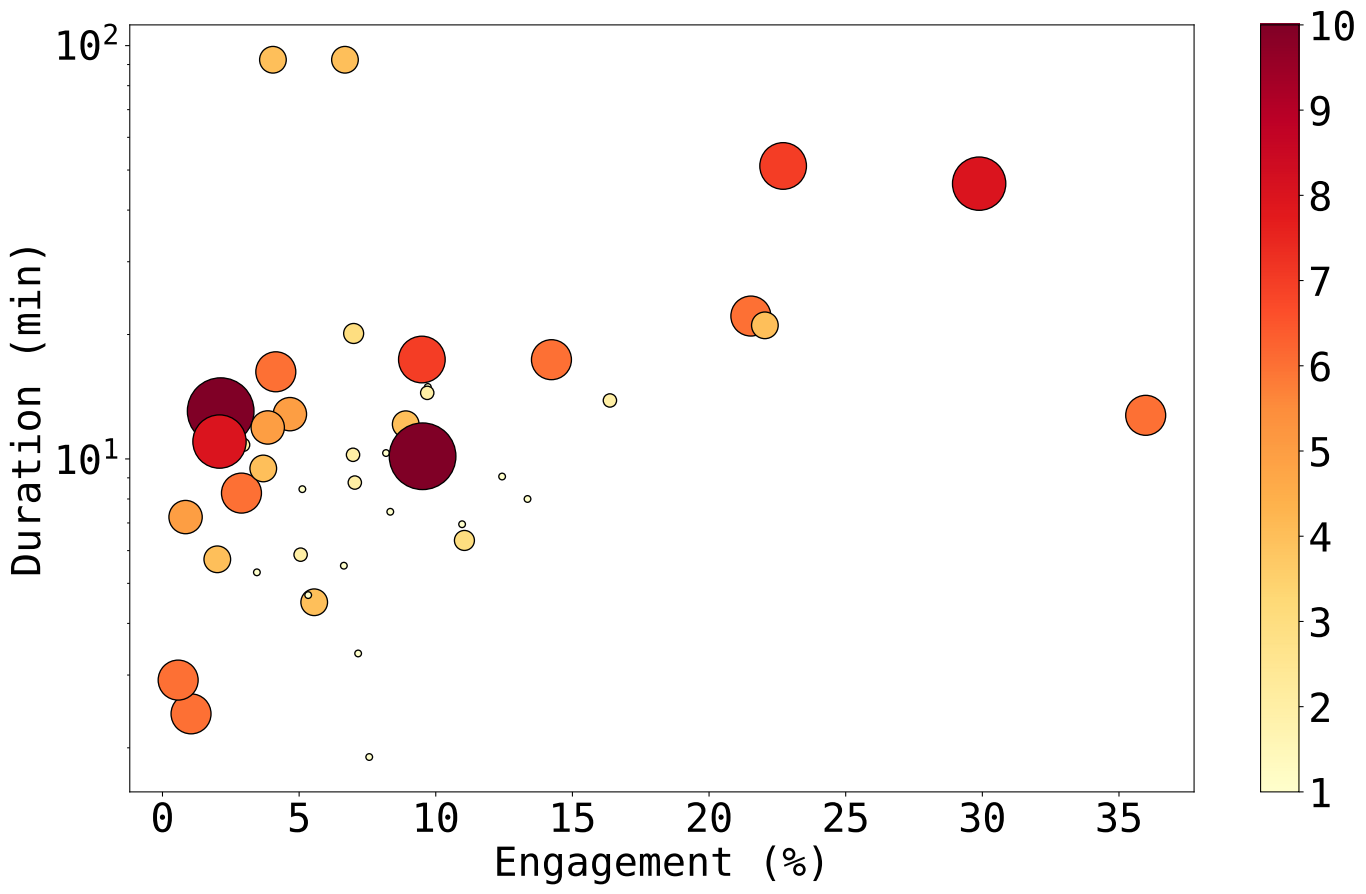

Supplement: Supplementary file 5 [file 25261583 › yt_recommendation/code/figures/Fig_01.odt]

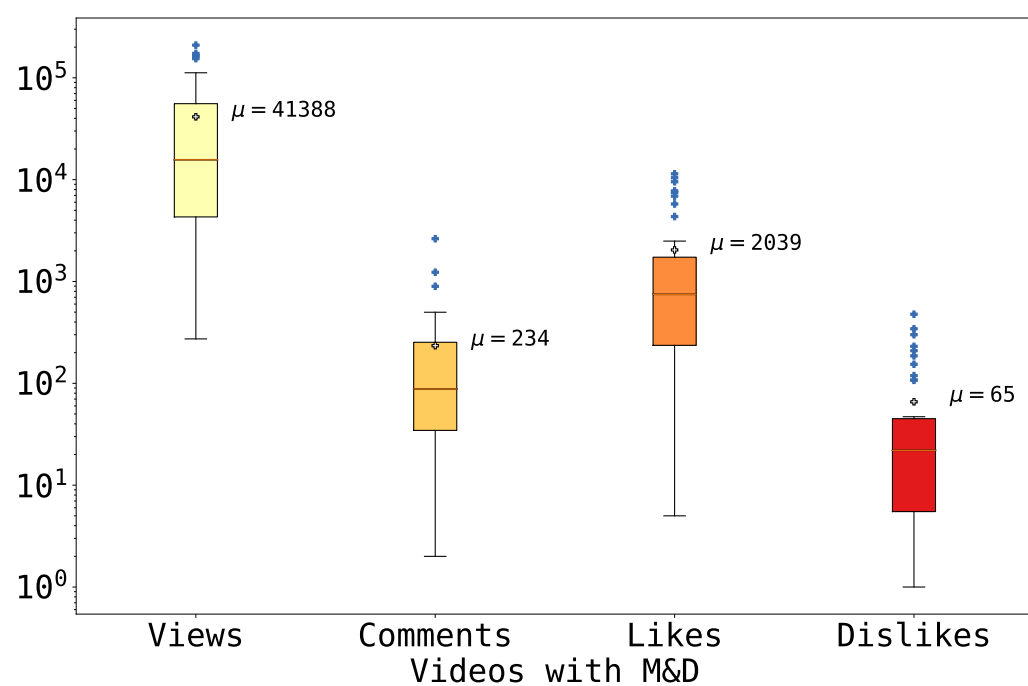

(a)

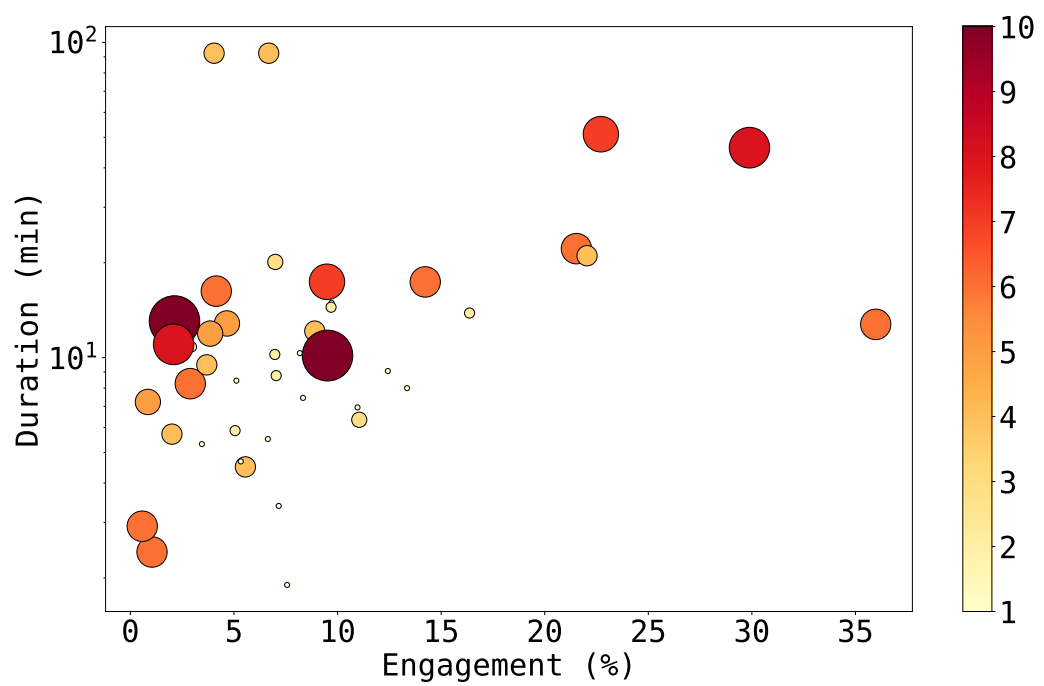

(b)

Supplement: Supplementary file 5 [file 25261583 › yt_recommendation/code/figures/Fig_01.pdf]

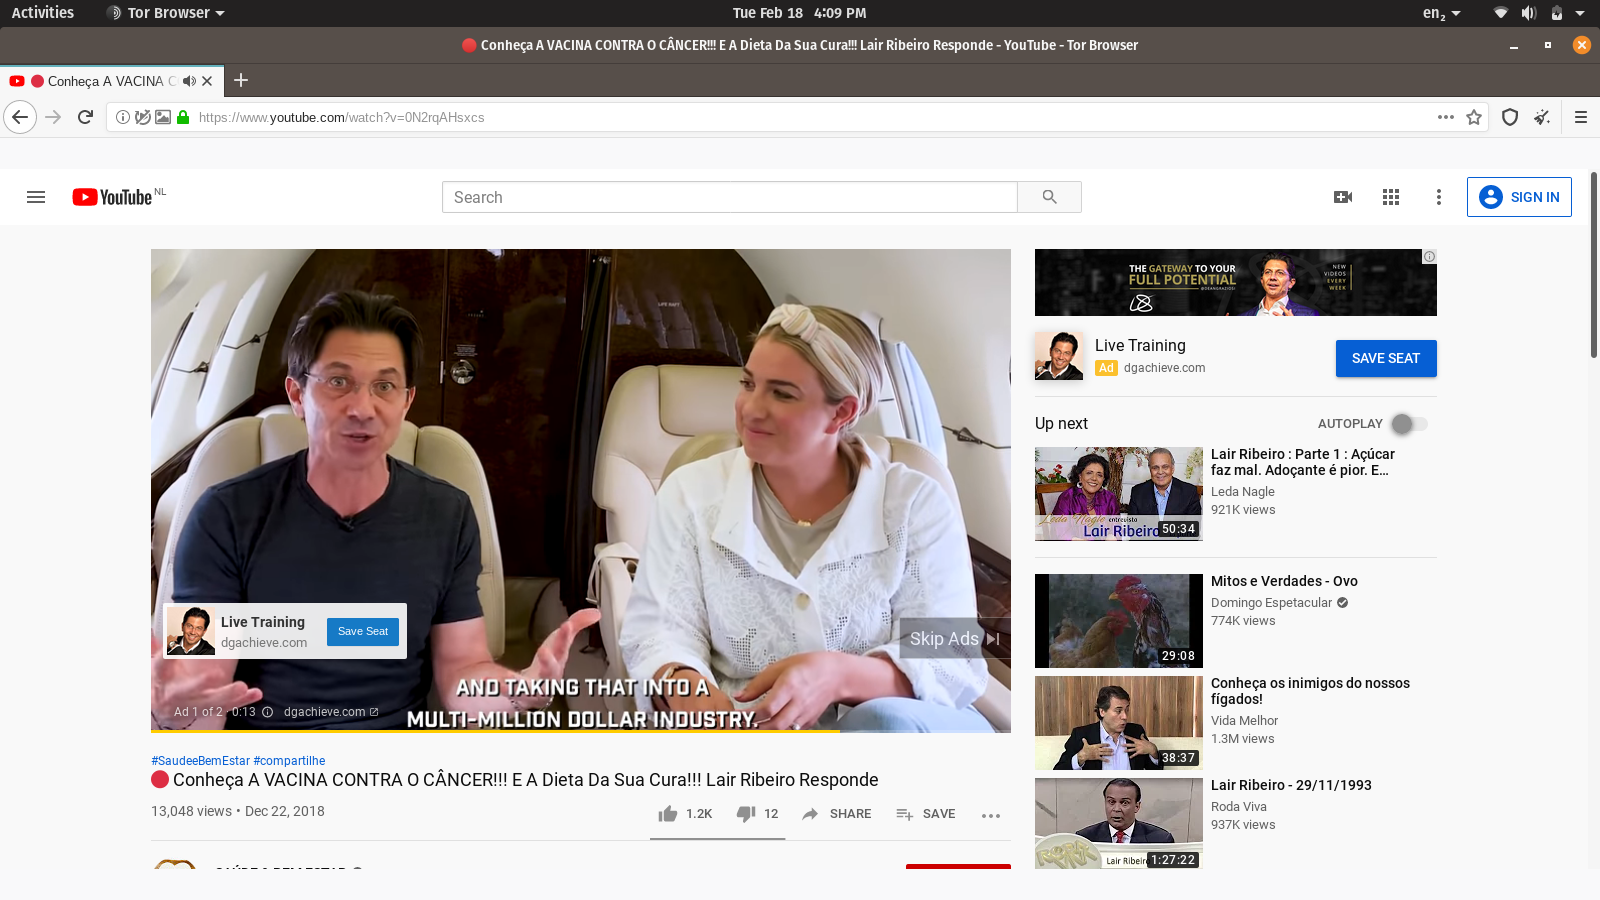

Supplement: Supplementary file 5 [file 25261583 › yt_recommendation/screenshots_m&d/0N2rqAHsxcs_1.png]

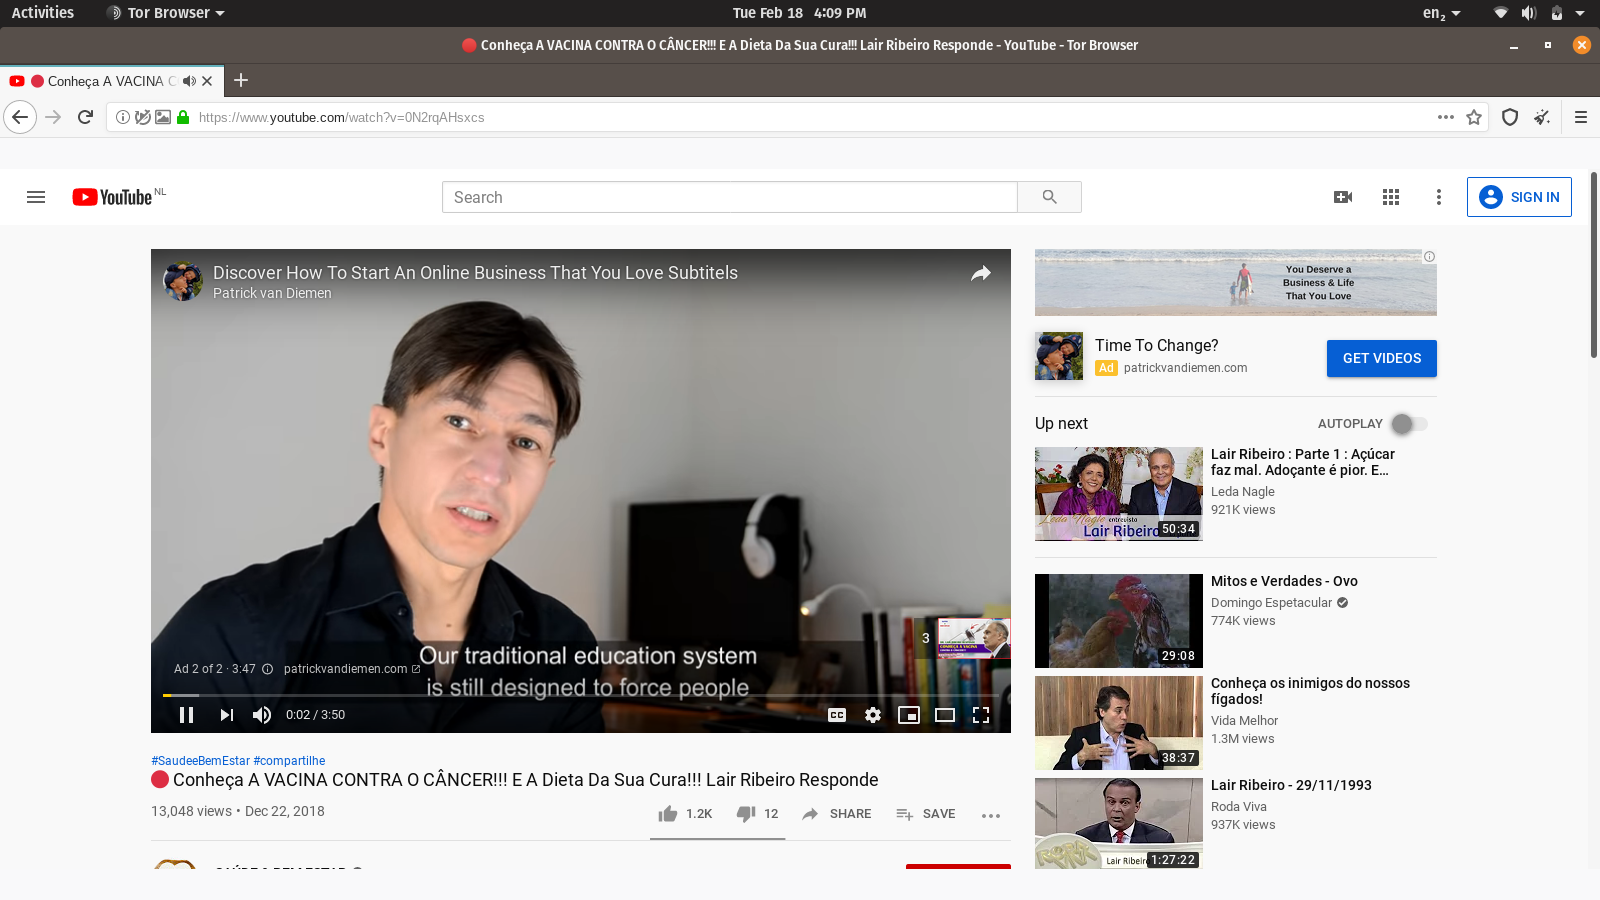

Supplement: Supplementary file 5 [file 25261583 › yt_recommendation/screenshots_m&d/0N2rqAHsxcs_2.png]

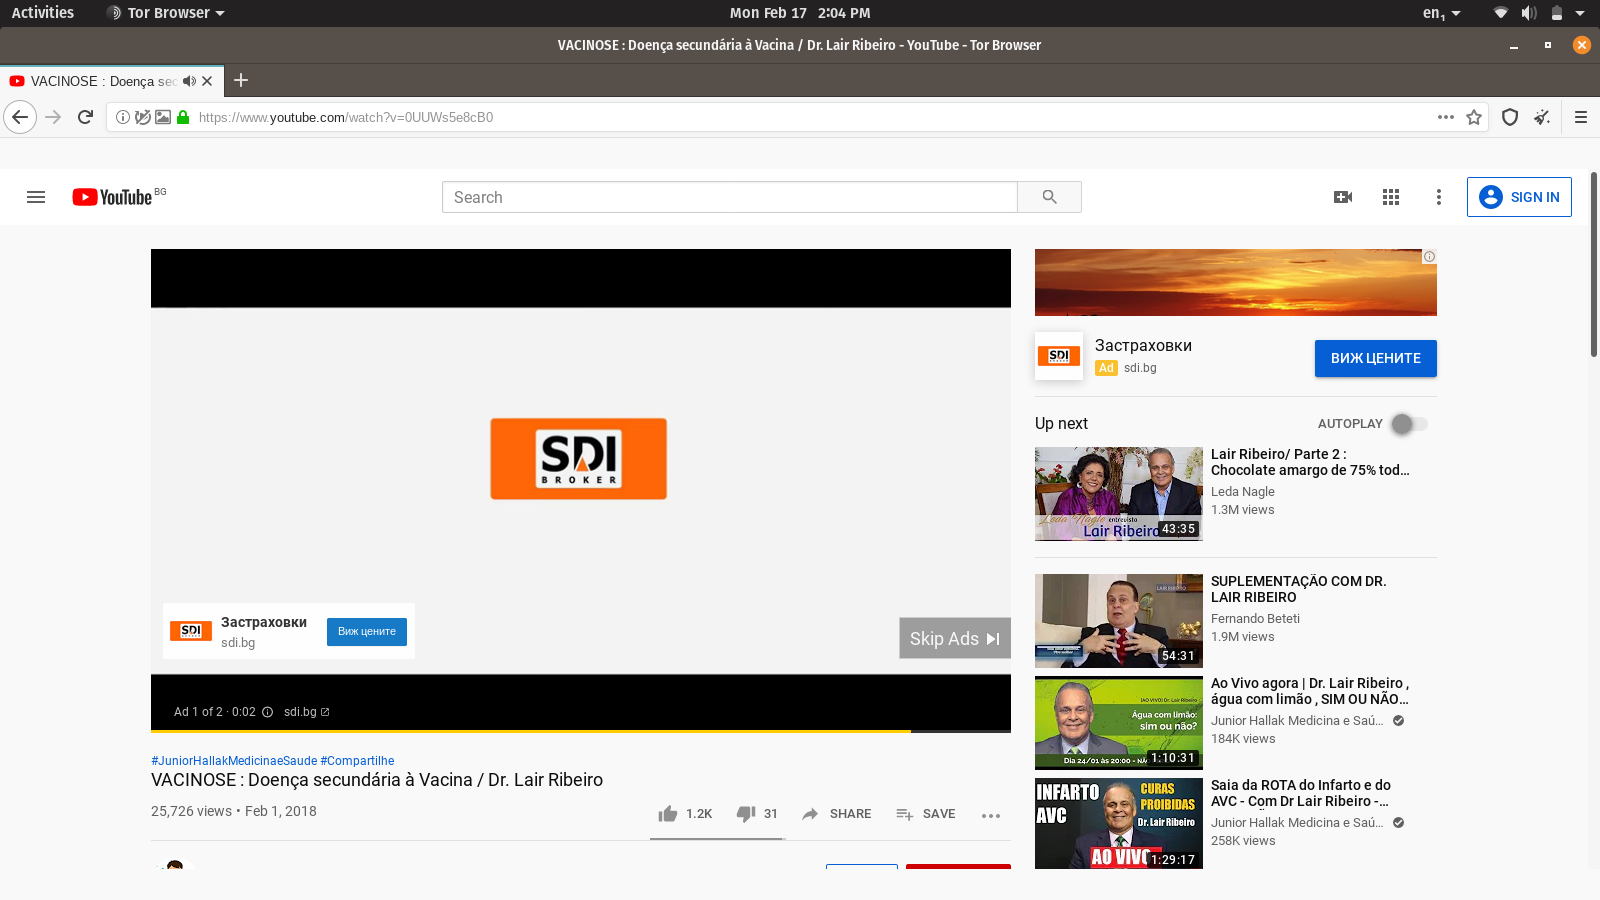

Supplement: Supplementary file 5 [file 25261583 › yt_recommendation/screenshots_m&d/0UUWs5e8cB0_1.png]

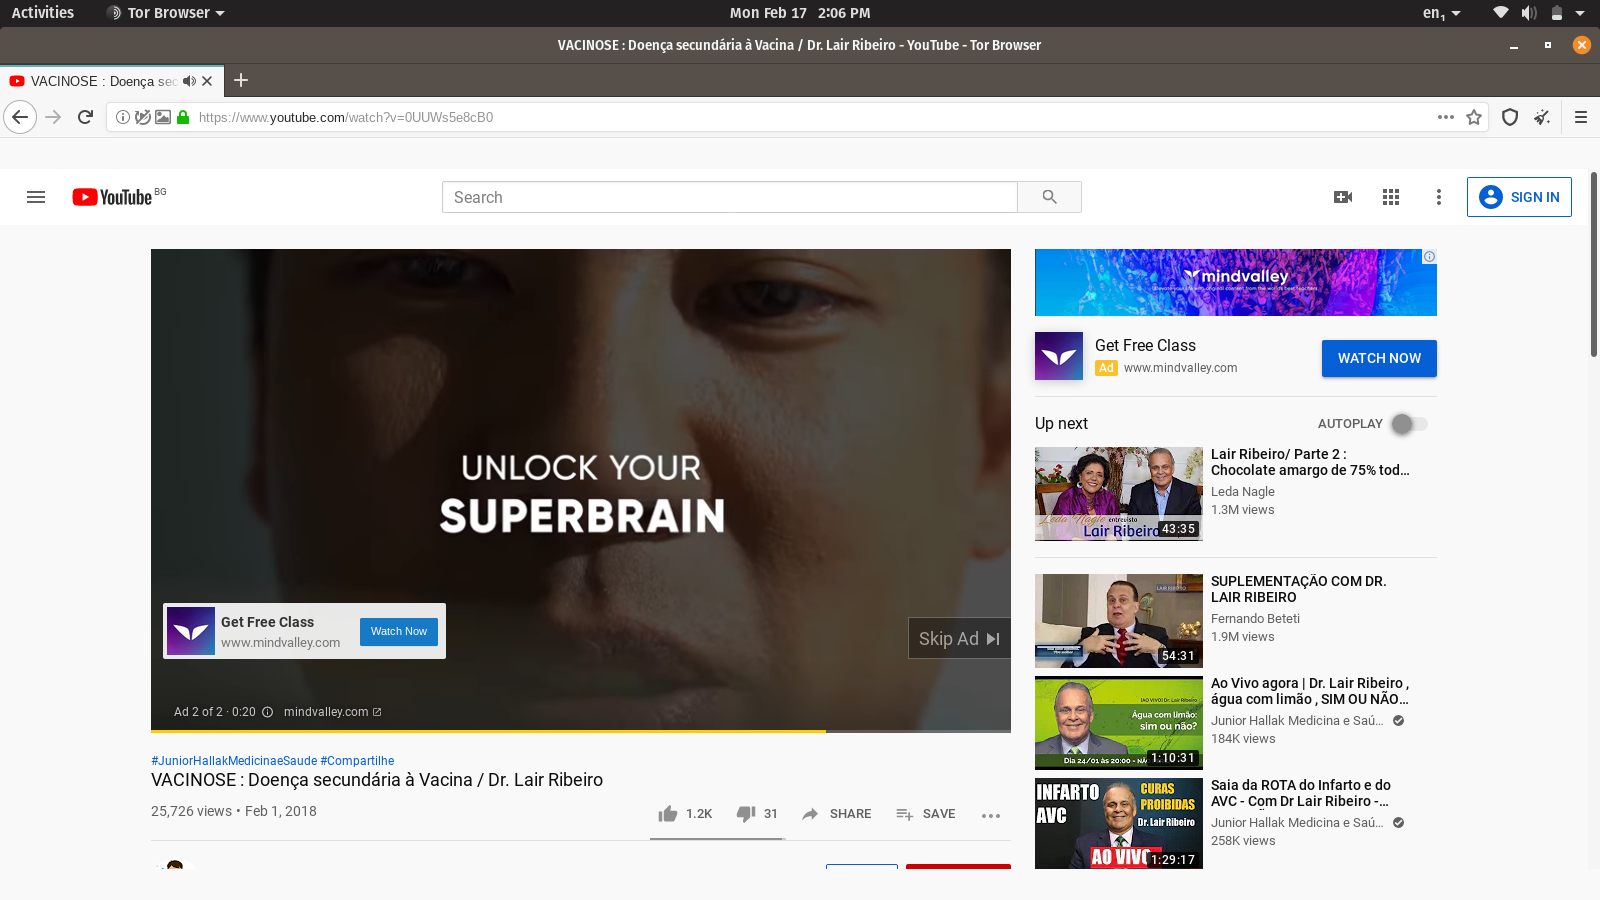

Supplement: Supplementary file 5 [file 25261583 › yt_recommendation/screenshots_m&d/0UUWs5e8cB0_2.png]

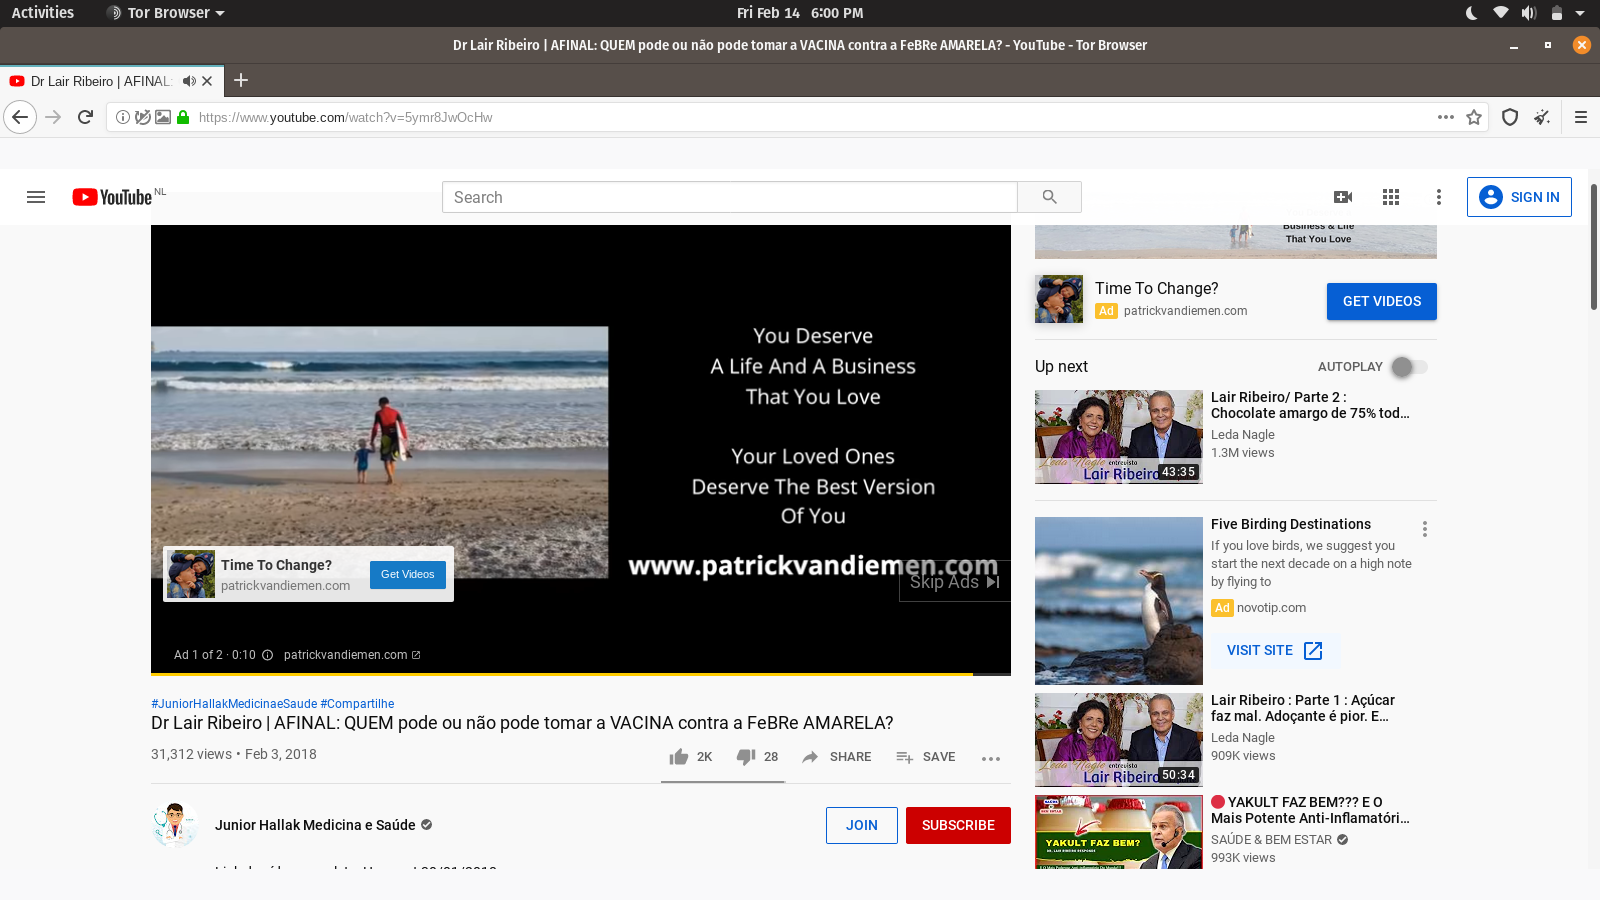

Supplement: Supplementary file 5 [file 25261583 › yt_recommendation/screenshots_m&d/5ymr8JwOcHw_1.png]

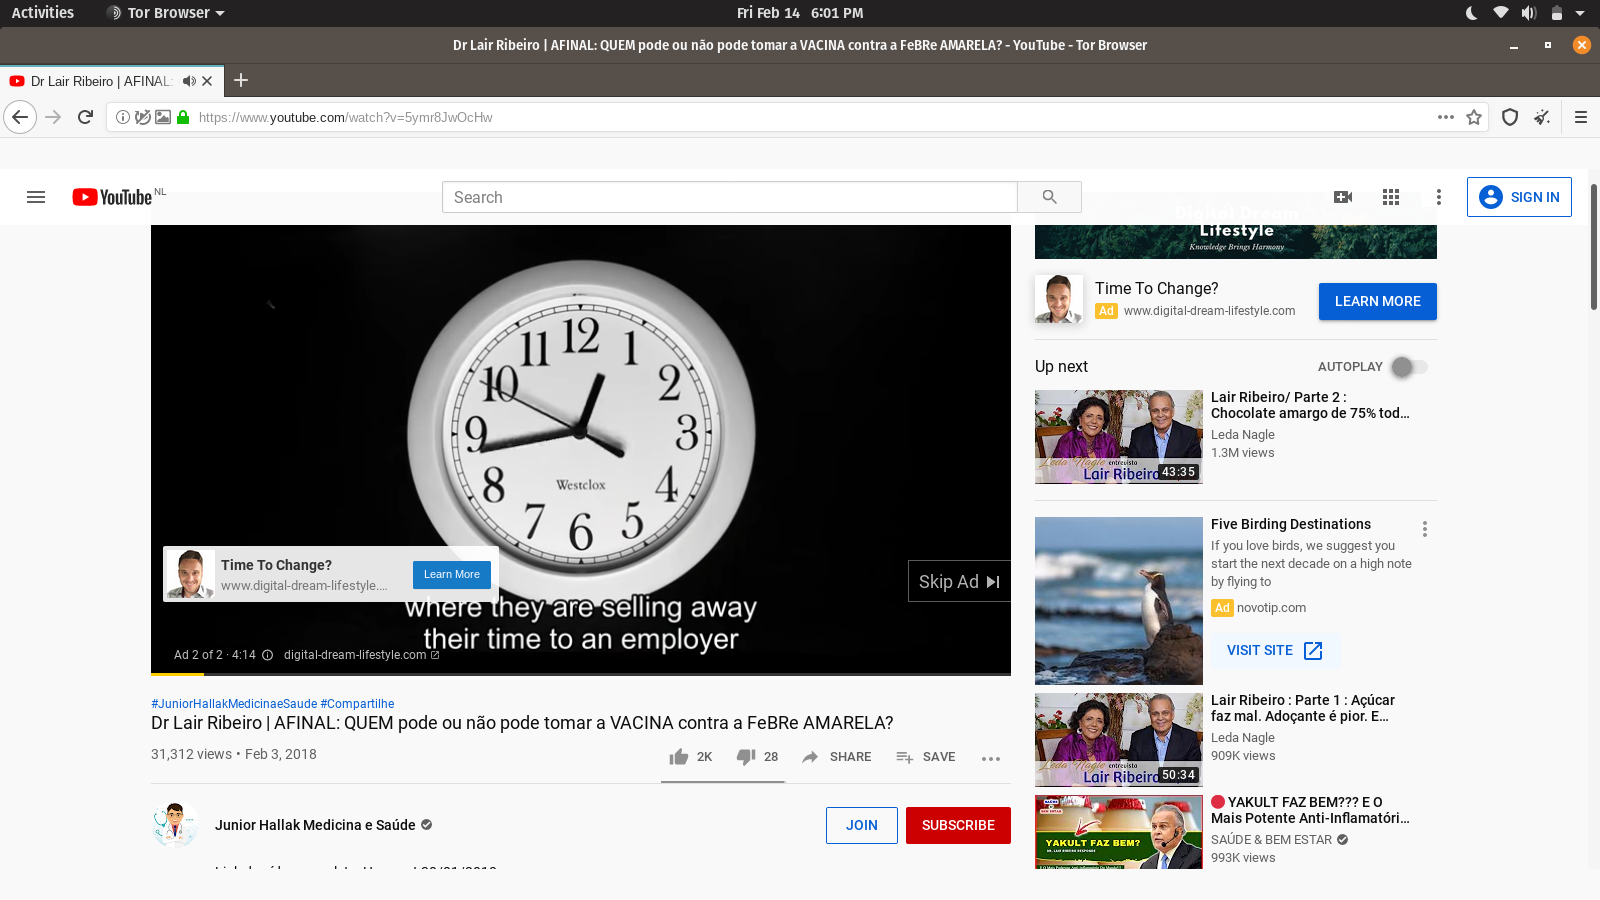

Supplement: Supplementary file 5 [file 25261583 › yt_recommendation/screenshots_m&d/5ymr8JwOcHw_2.png]

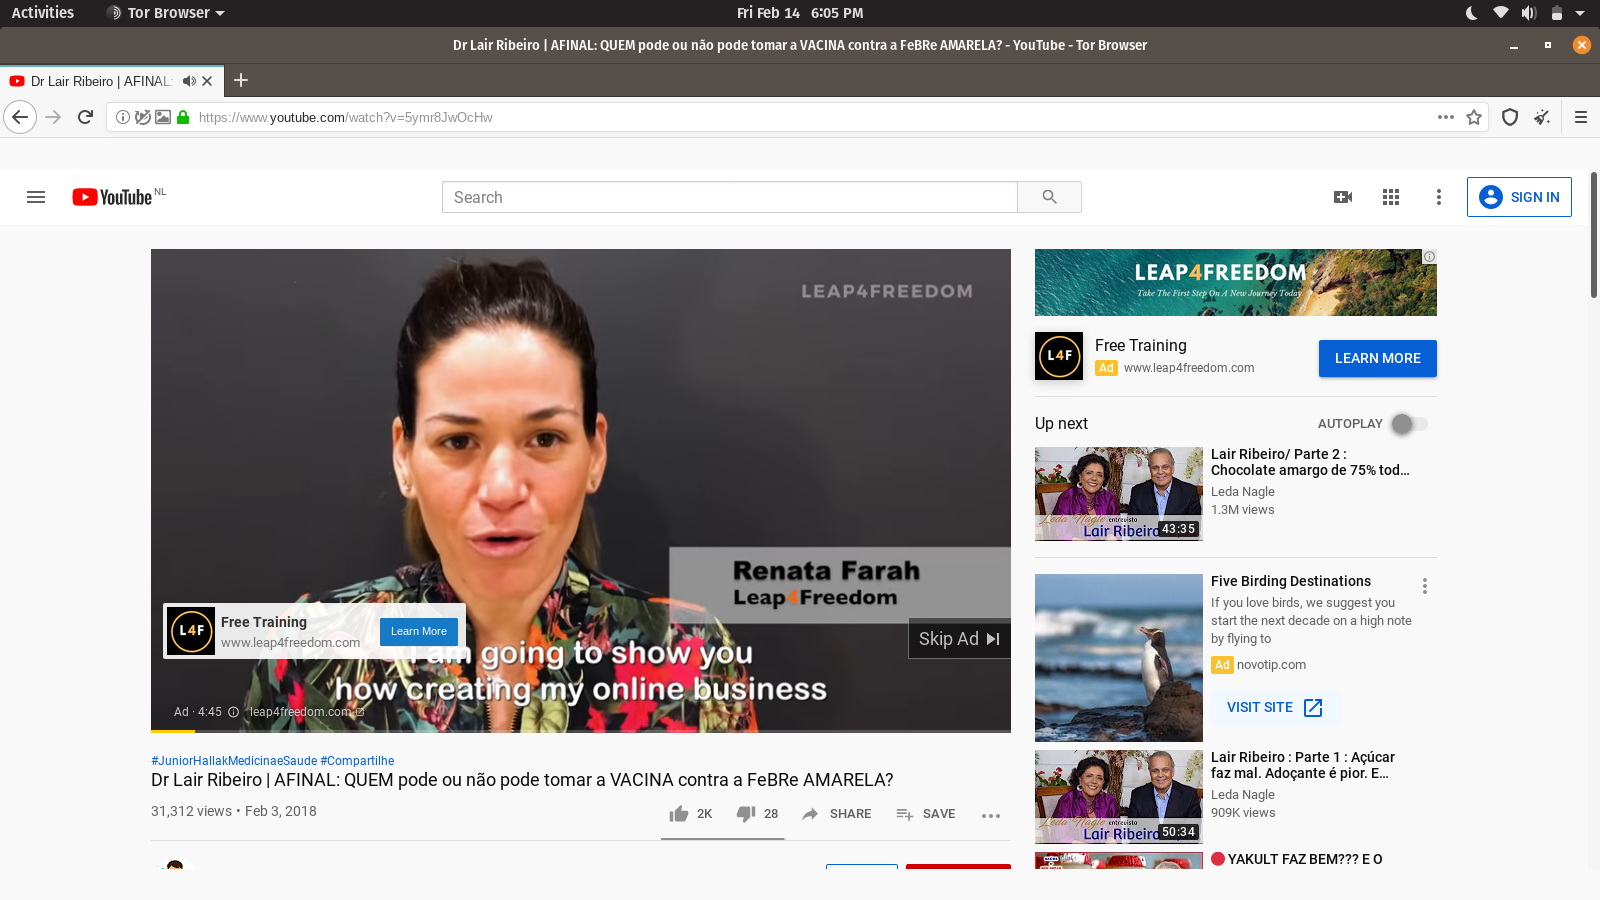

Supplement: Supplementary file 5 [file 25261583 › yt_recommendation/screenshots_m&d/5ymr8JwOcHw_3.png]

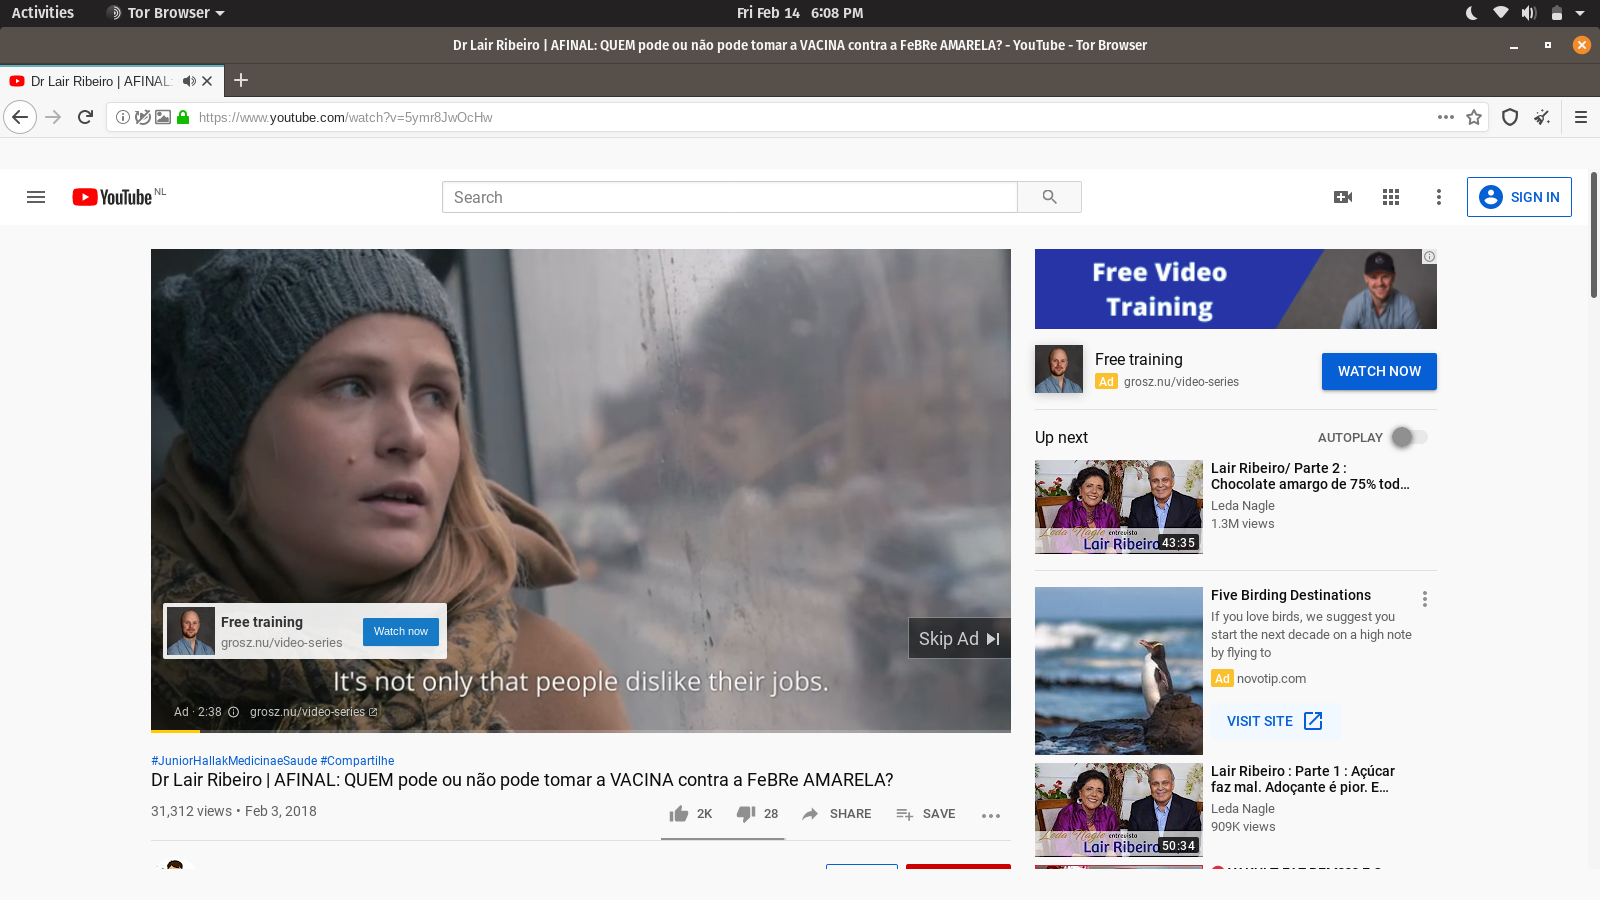

Supplement: Supplementary file 5 [file 25261583 › yt_recommendation/screenshots_m&d/5ymr8JwOcHw_4.png]

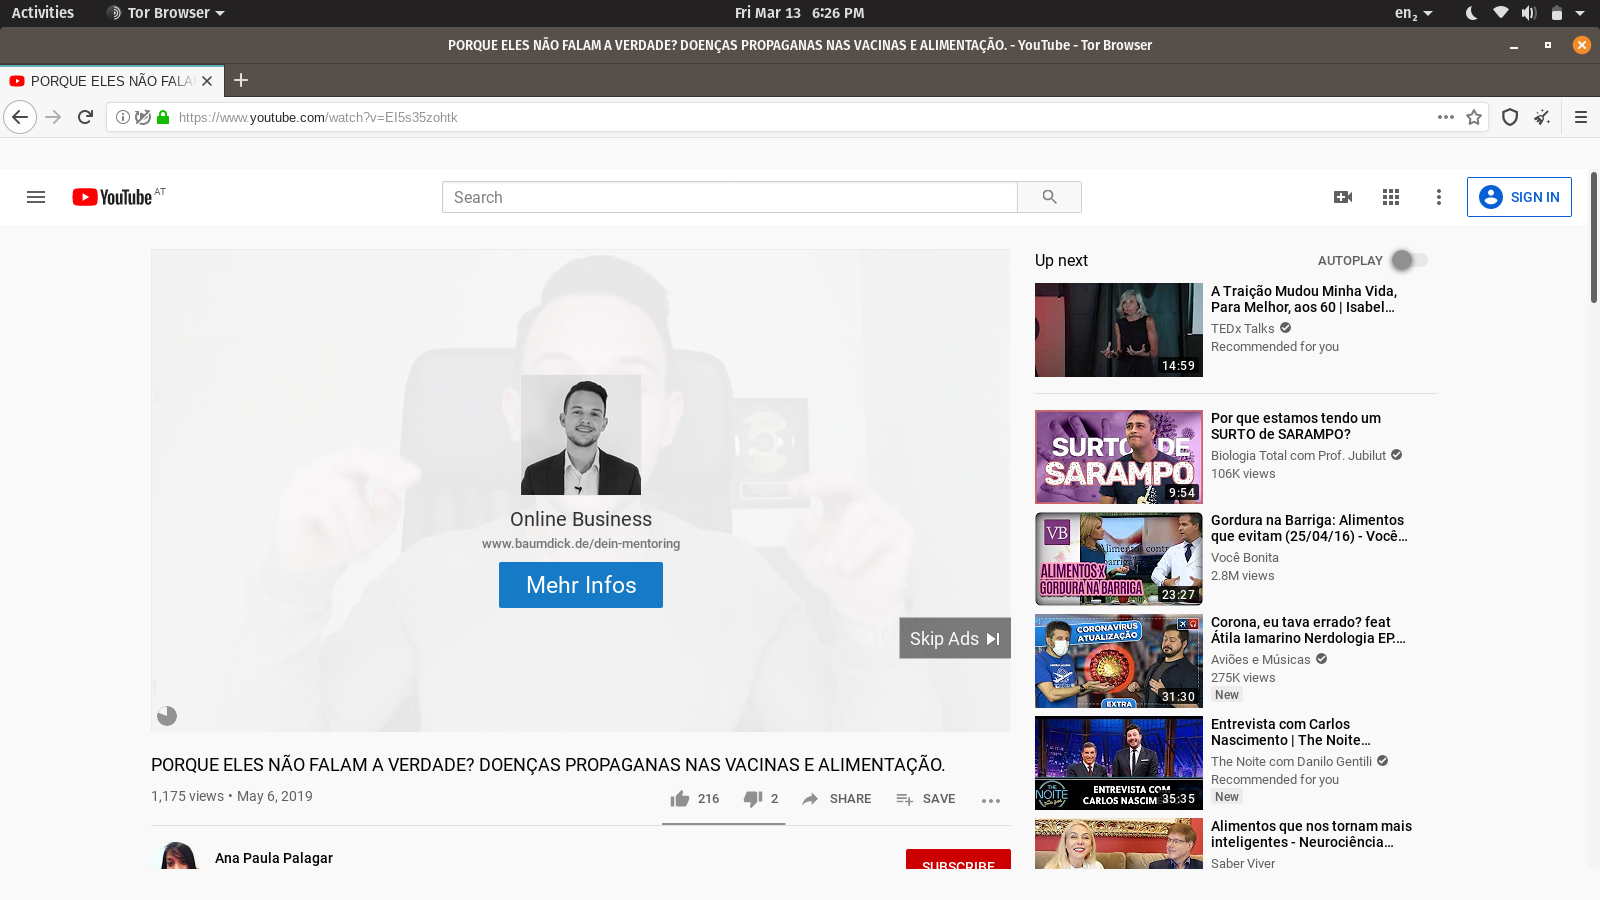

Supplement: Supplementary file 5 [file 25261583 › yt_recommendation/screenshots_m&d/EI5s35zohtk_1.png]

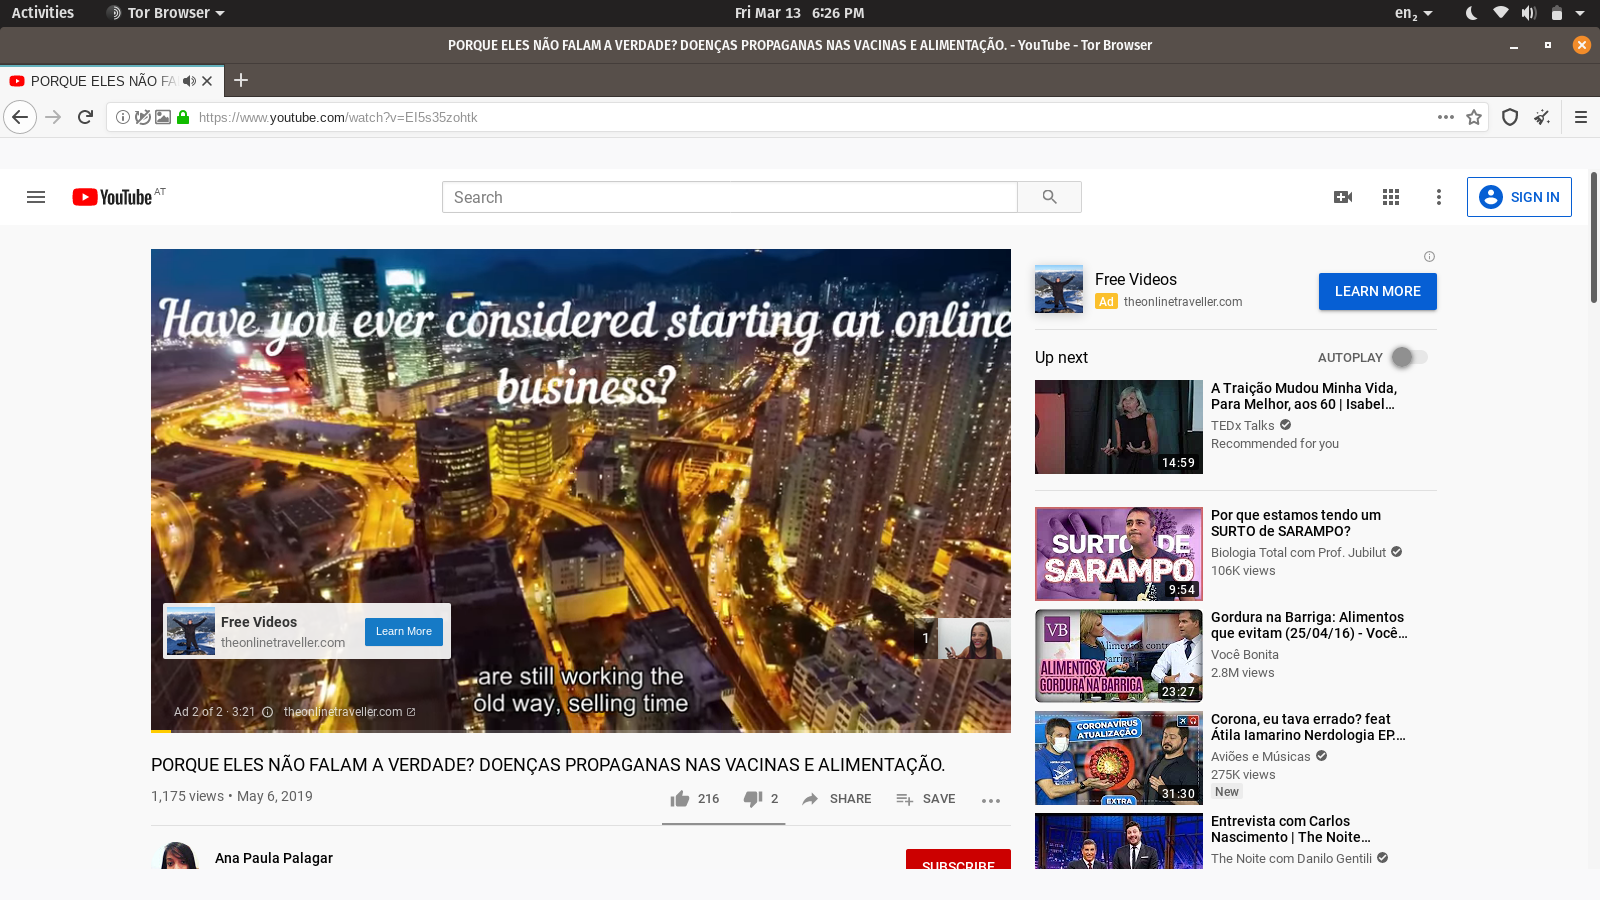

Supplement: Supplementary file 5 [file 25261583 › yt_recommendation/screenshots_m&d/EI5s35zohtk_2.png]

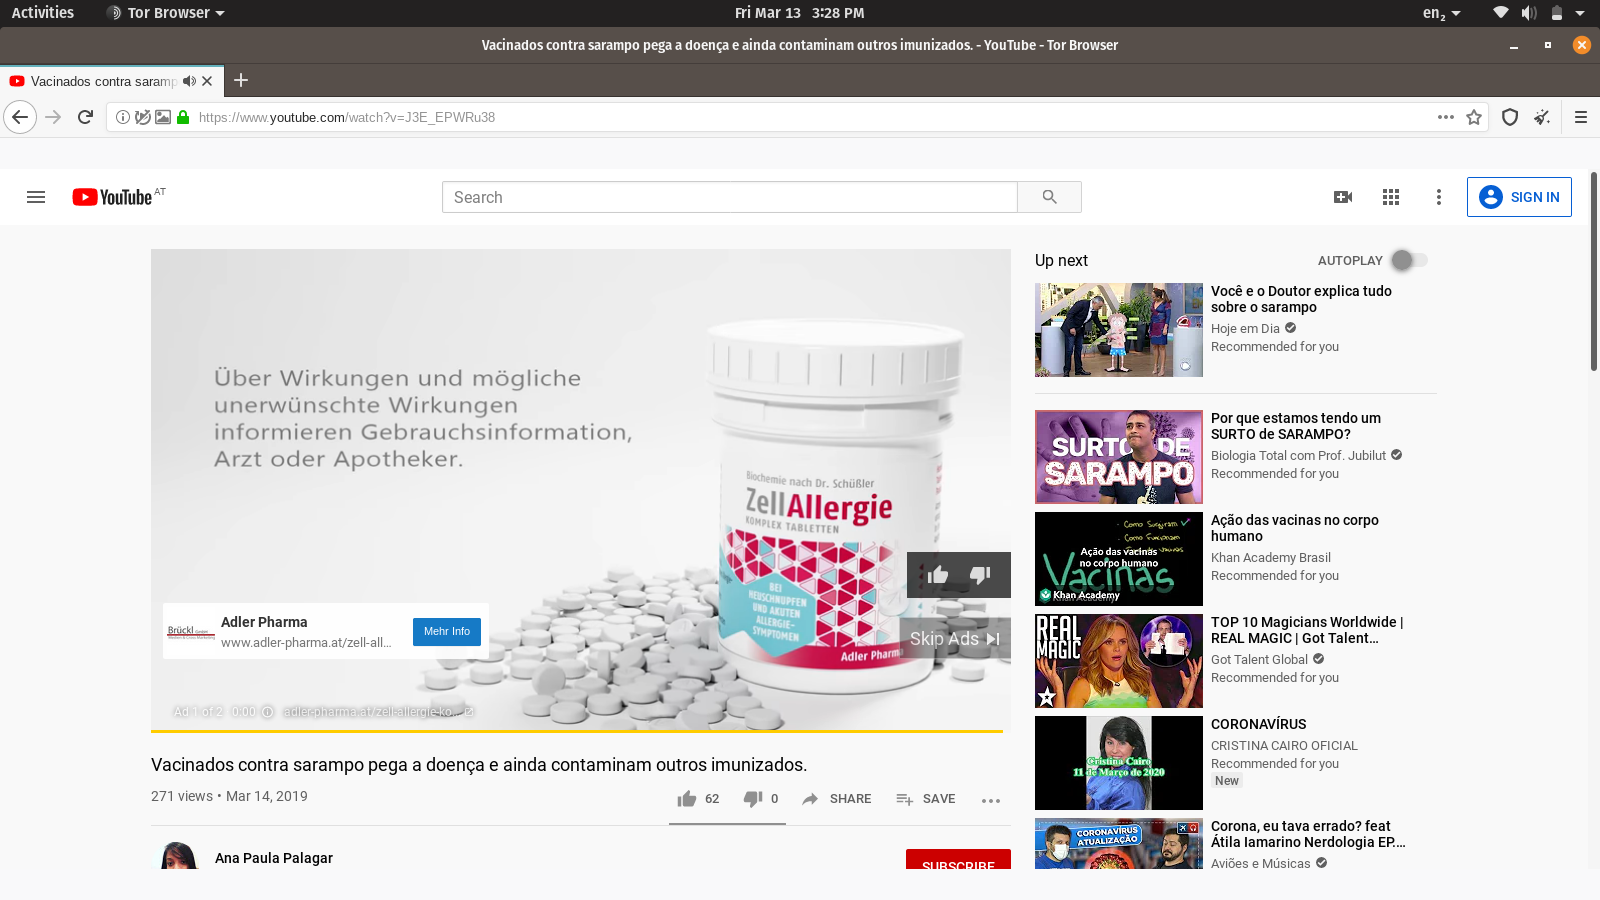

Supplement: Supplementary file 5 [file 25261583 › yt_recommendation/screenshots_m&d/J3E_EPWRu38_1.png]

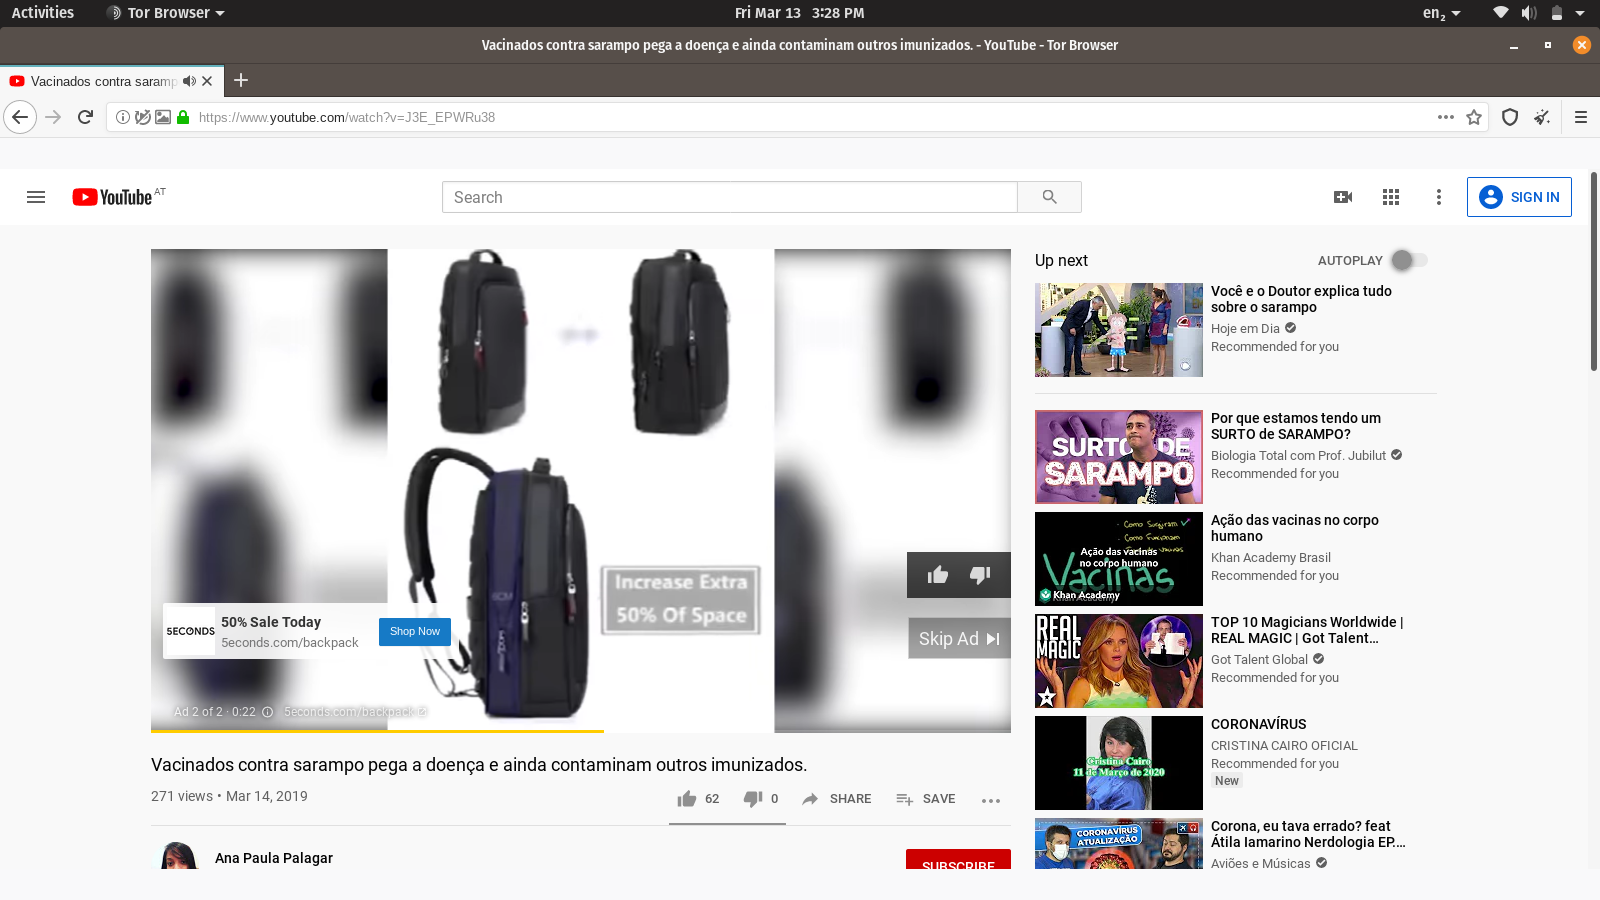

Supplement: Supplementary file 5 [file 25261583 › yt_recommendation/screenshots_m&d/J3E_EPWRu38_2.png]

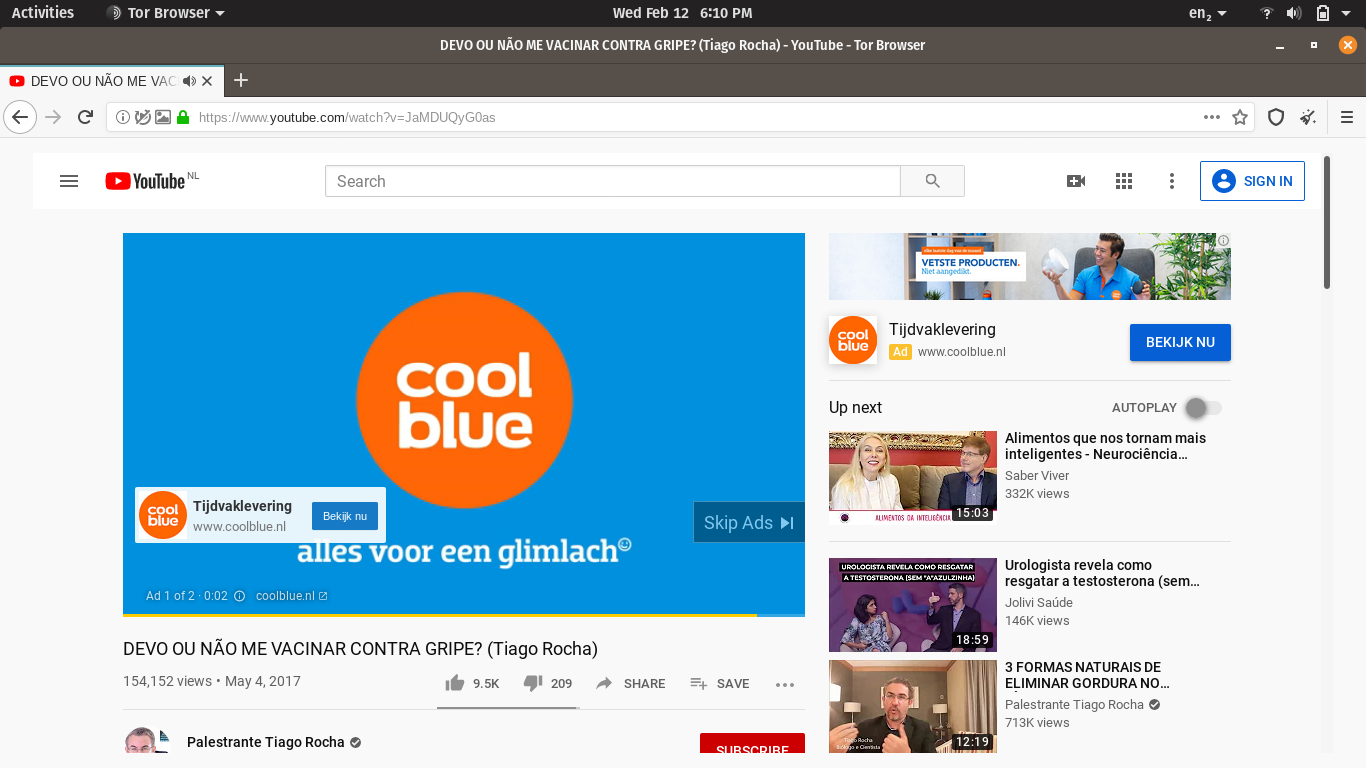

Supplement: Supplementary file 5 [file 25261583 › yt_recommendation/screenshots_m&d/JaMDUQyG0as_1.png]

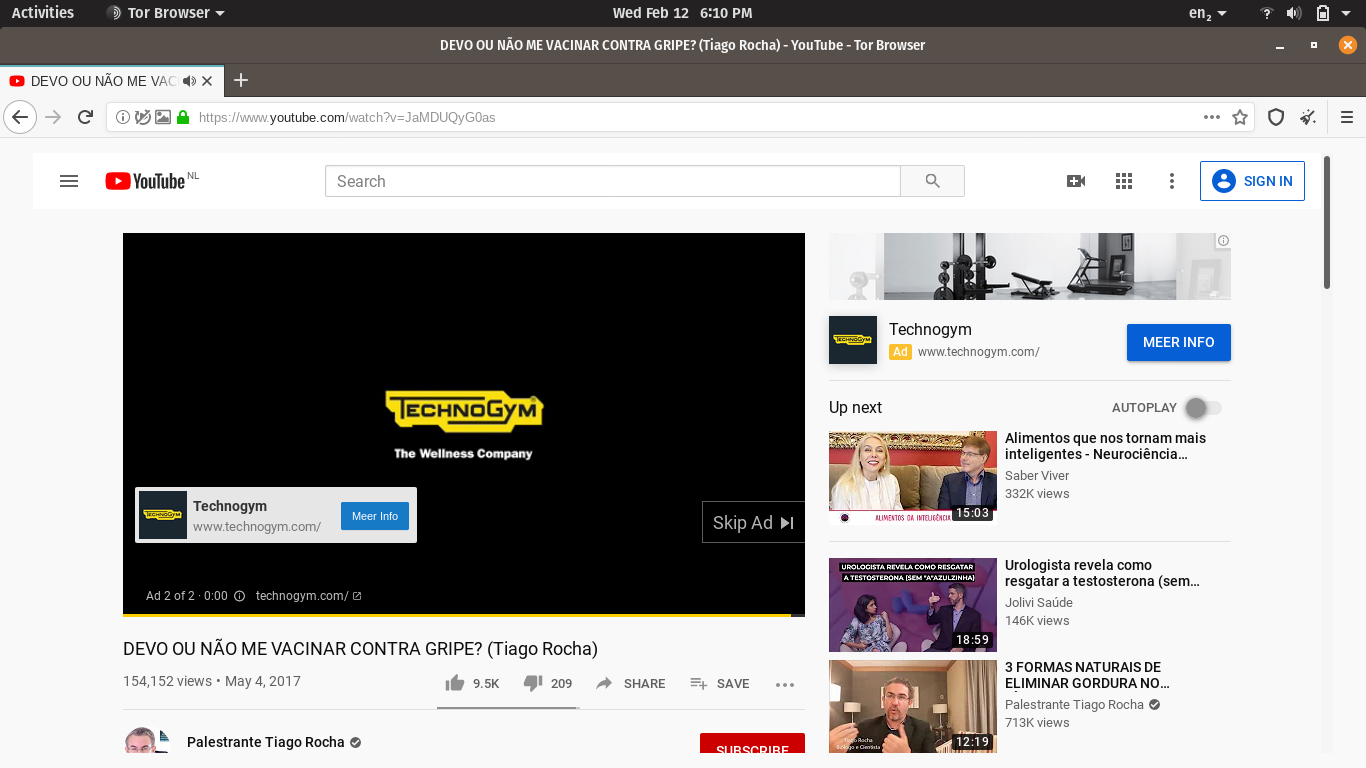

Supplement: Supplementary file 5 [file 25261583 › yt_recommendation/screenshots_m&d/JaMDUQyG0as_2.png]

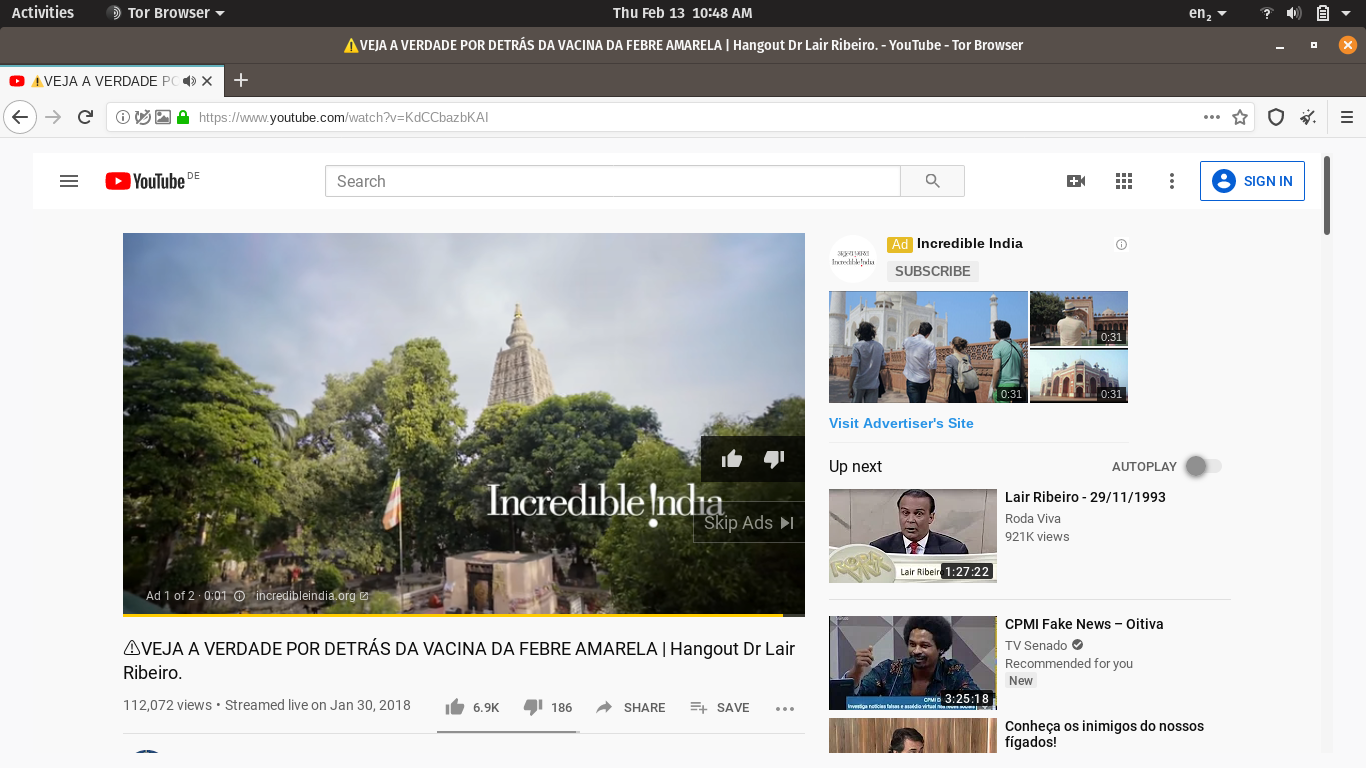

Supplement: Supplementary file 5 [file 25261583 › yt_recommendation/screenshots_m&d/KdCCbazbKAI_1.png]

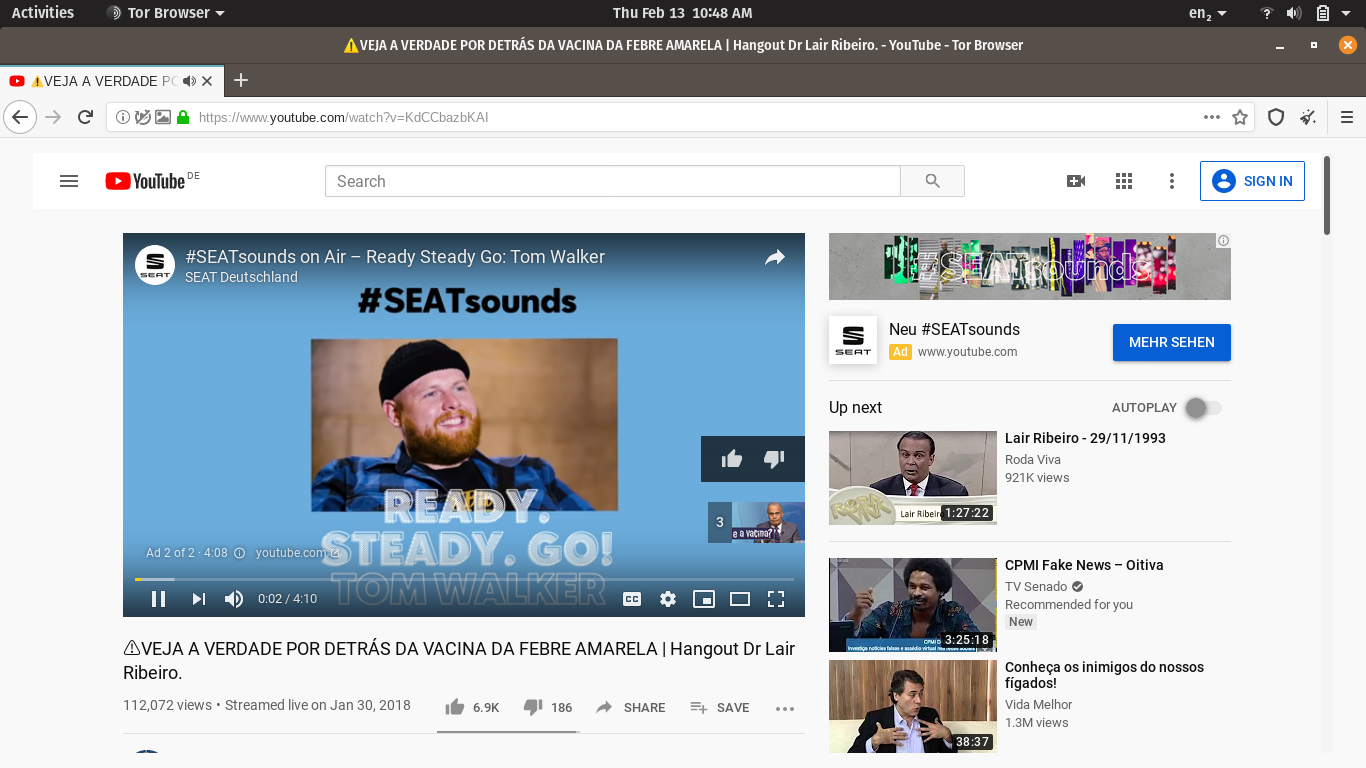

Supplement: Supplementary file 5 [file 25261583 › yt_recommendation/screenshots_m&d/KdCCbazbKAI_2.png]

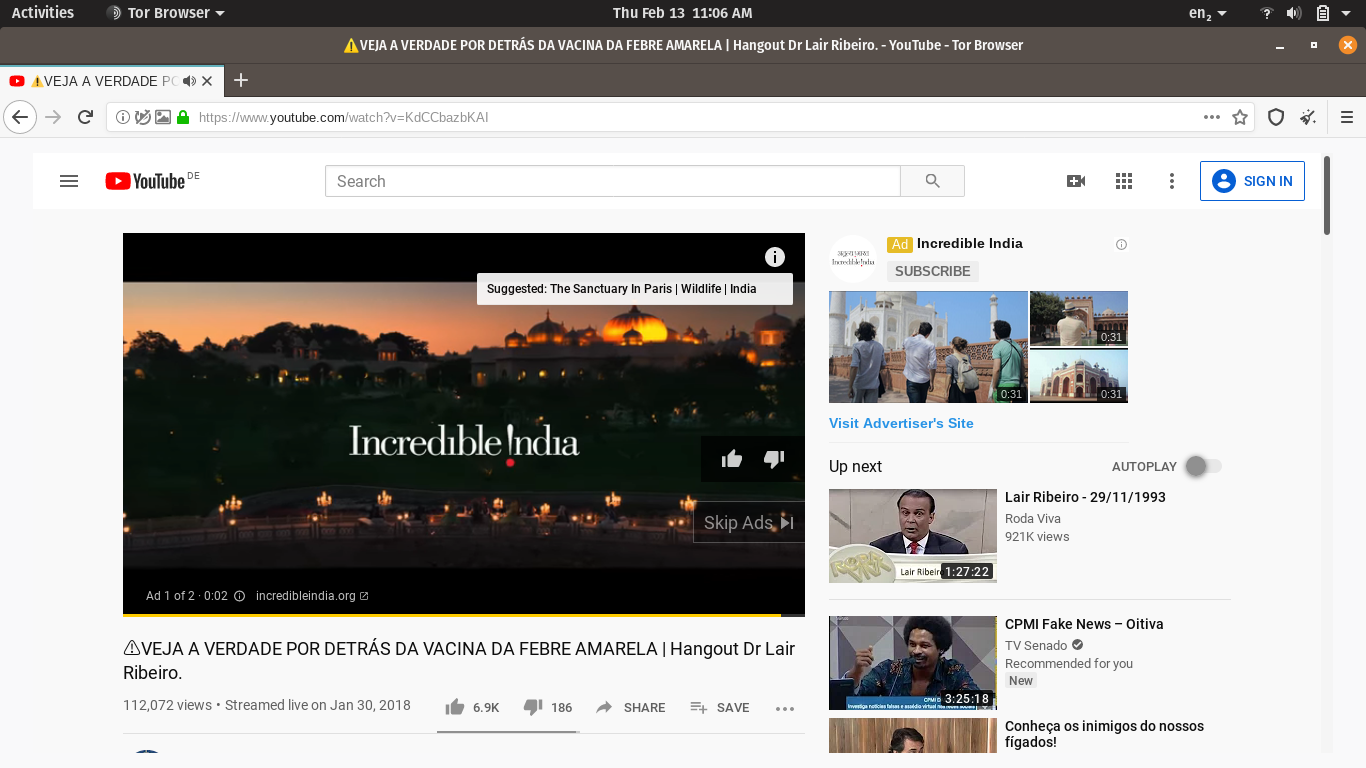

Supplement: Supplementary file 5 [file 25261583 › yt_recommendation/screenshots_m&d/KdCCbazbKAI_3.png]

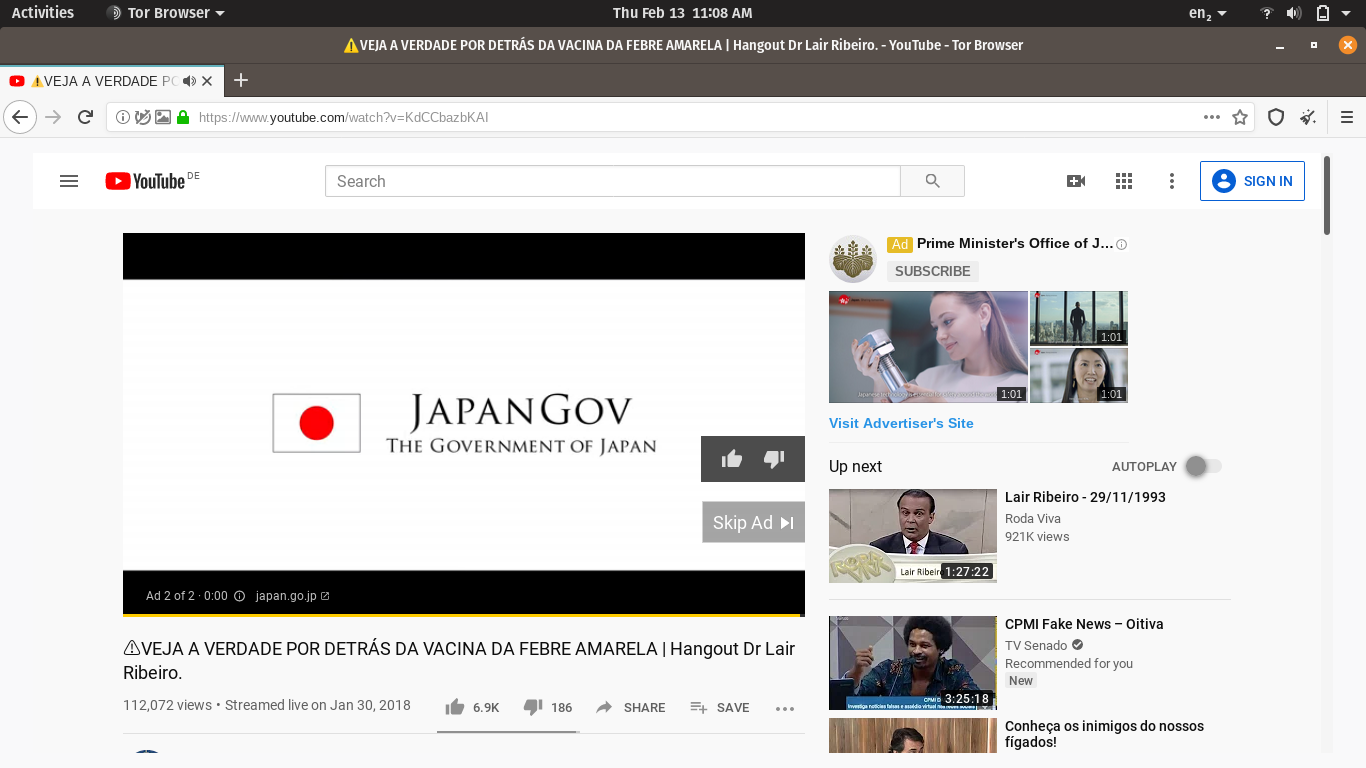

Supplement: Supplementary file 5 [file 25261583 › yt_recommendation/screenshots_m&d/KdCCbazbKAI_4.png]

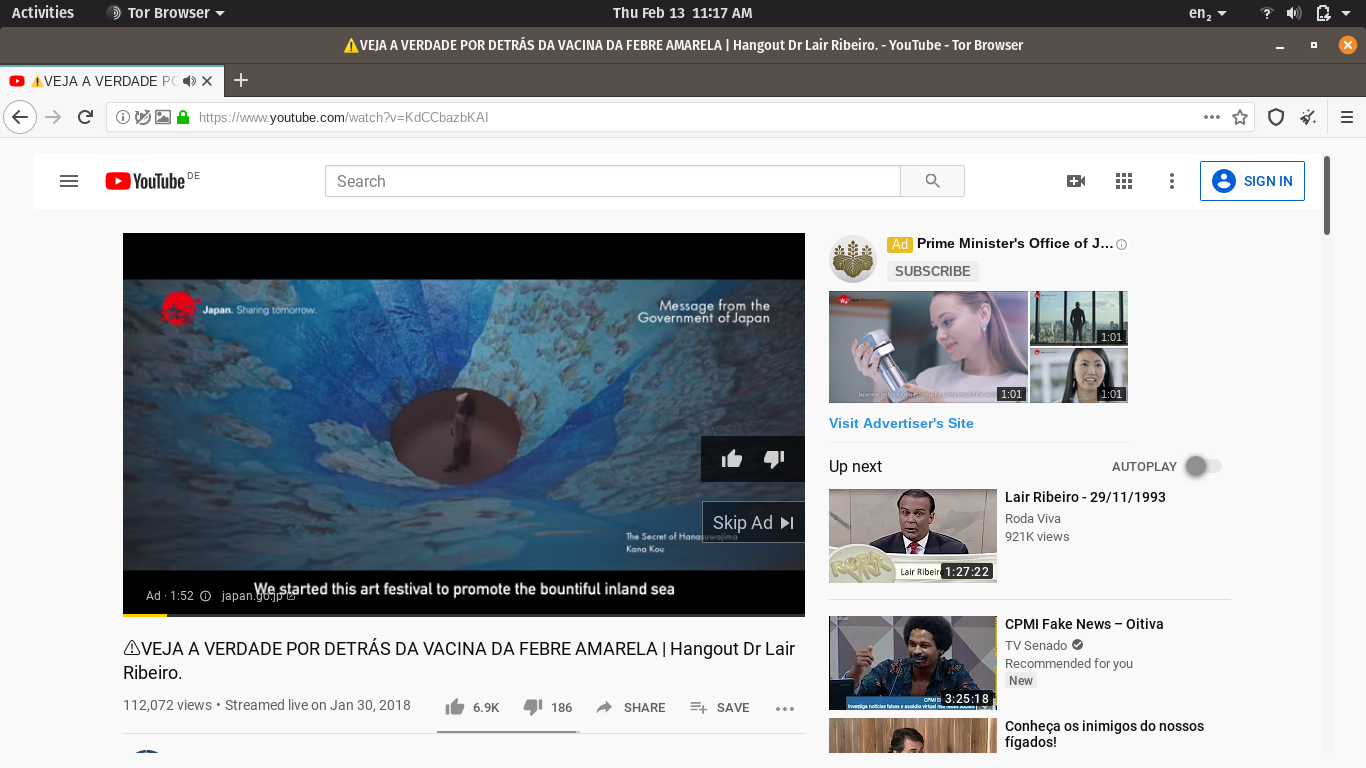

Supplement: Supplementary file 5 [file 25261583 › yt_recommendation/screenshots_m&d/KdCCbazbKAI_5.png]

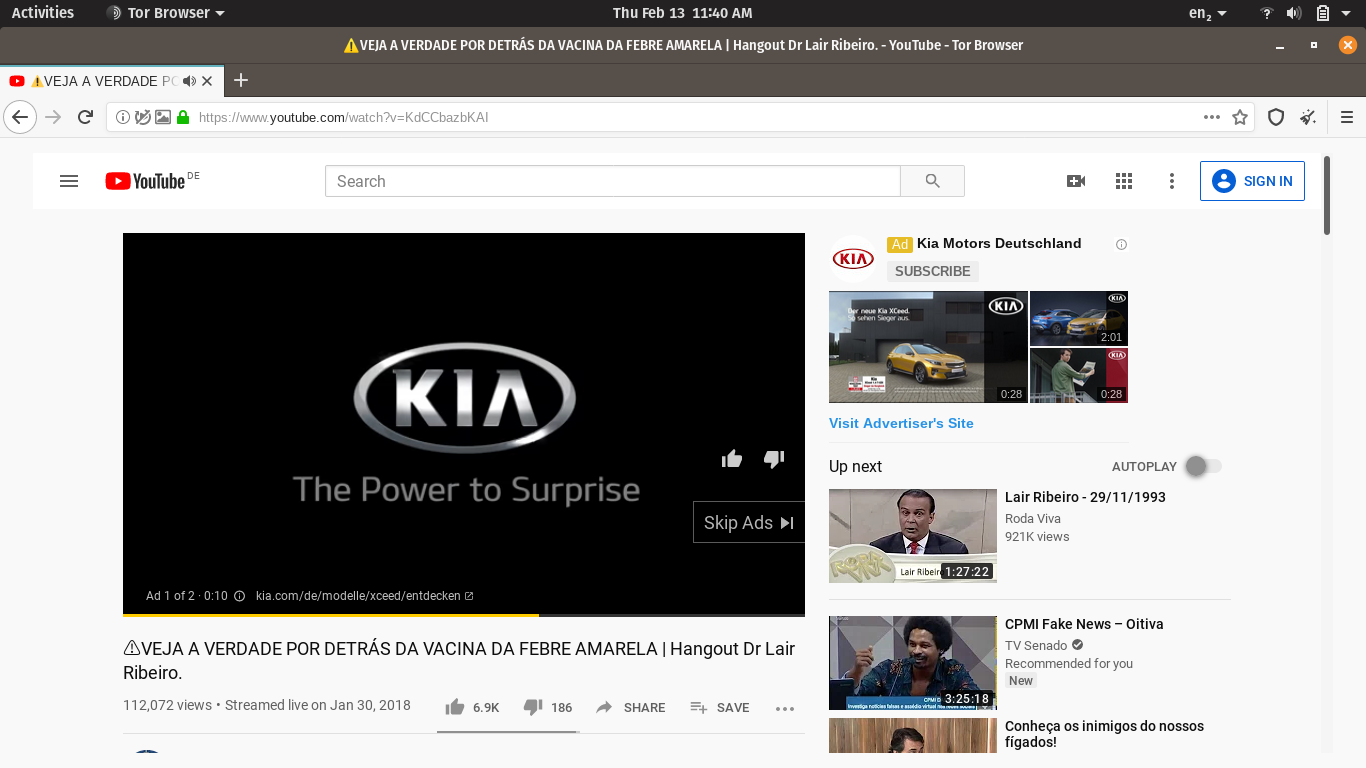

Supplement: Supplementary file 5 [file 25261583 › yt_recommendation/screenshots_m&d/KdCCbazbKAI_6.png]

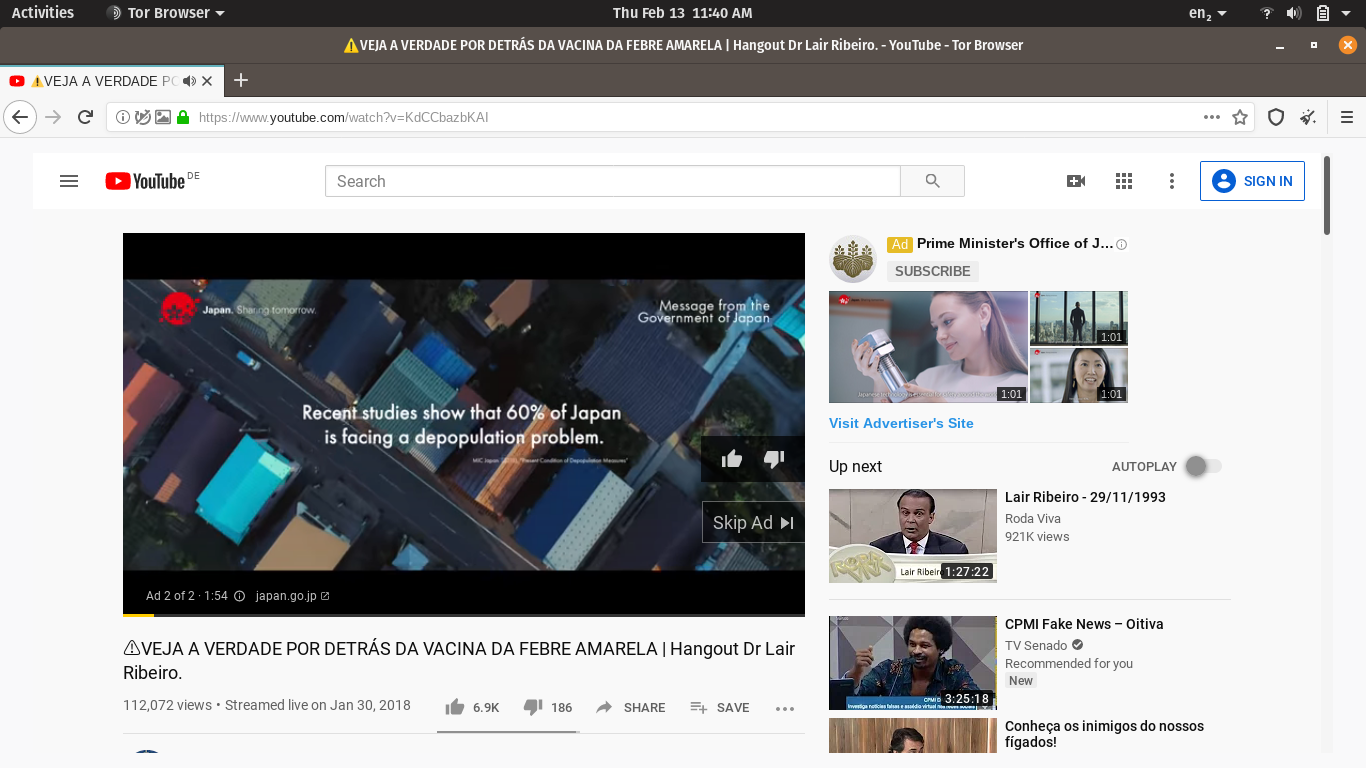

Supplement: Supplementary file 5 [file 25261583 › yt_recommendation/screenshots_m&d/KdCCbazbKAI_7.png]

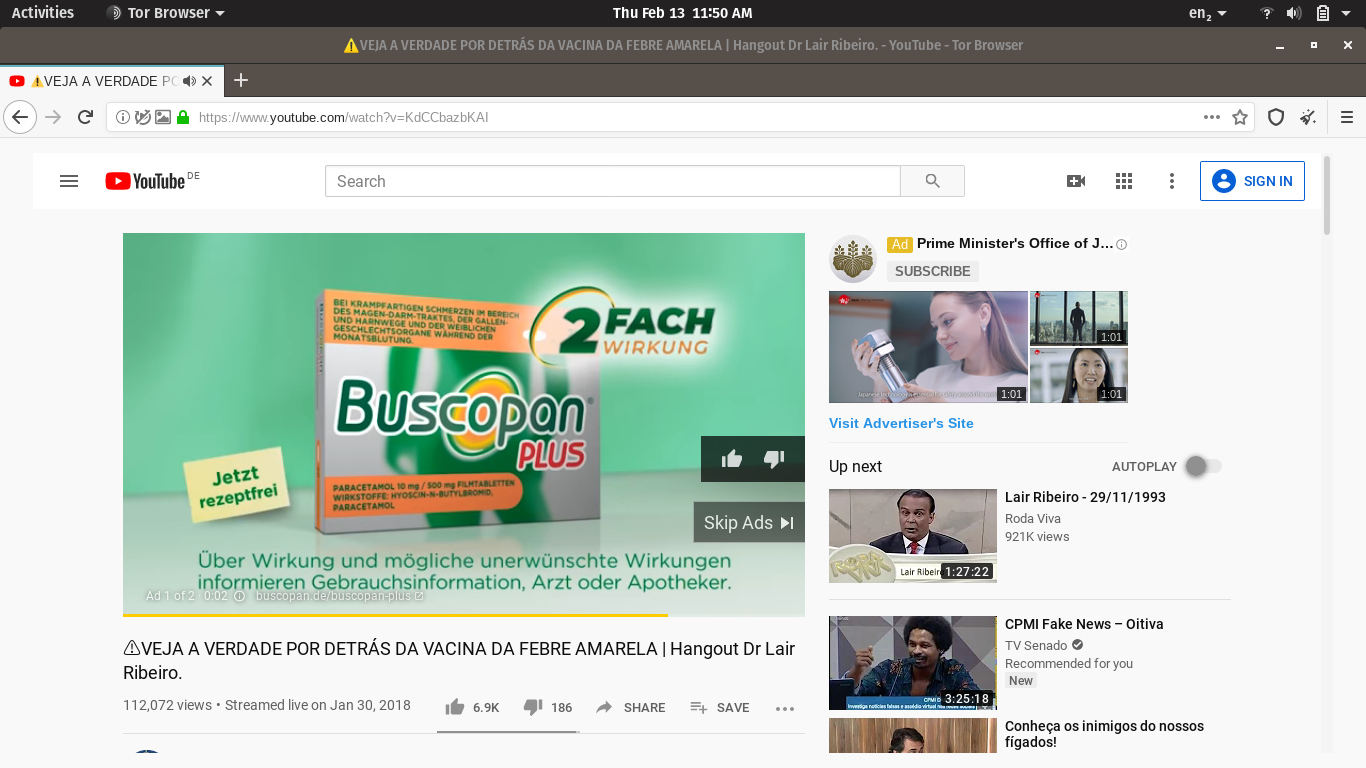

Supplement: Supplementary file 5 [file 25261583 › yt_recommendation/screenshots_m&d/KdCCbazbKAI_8.png]

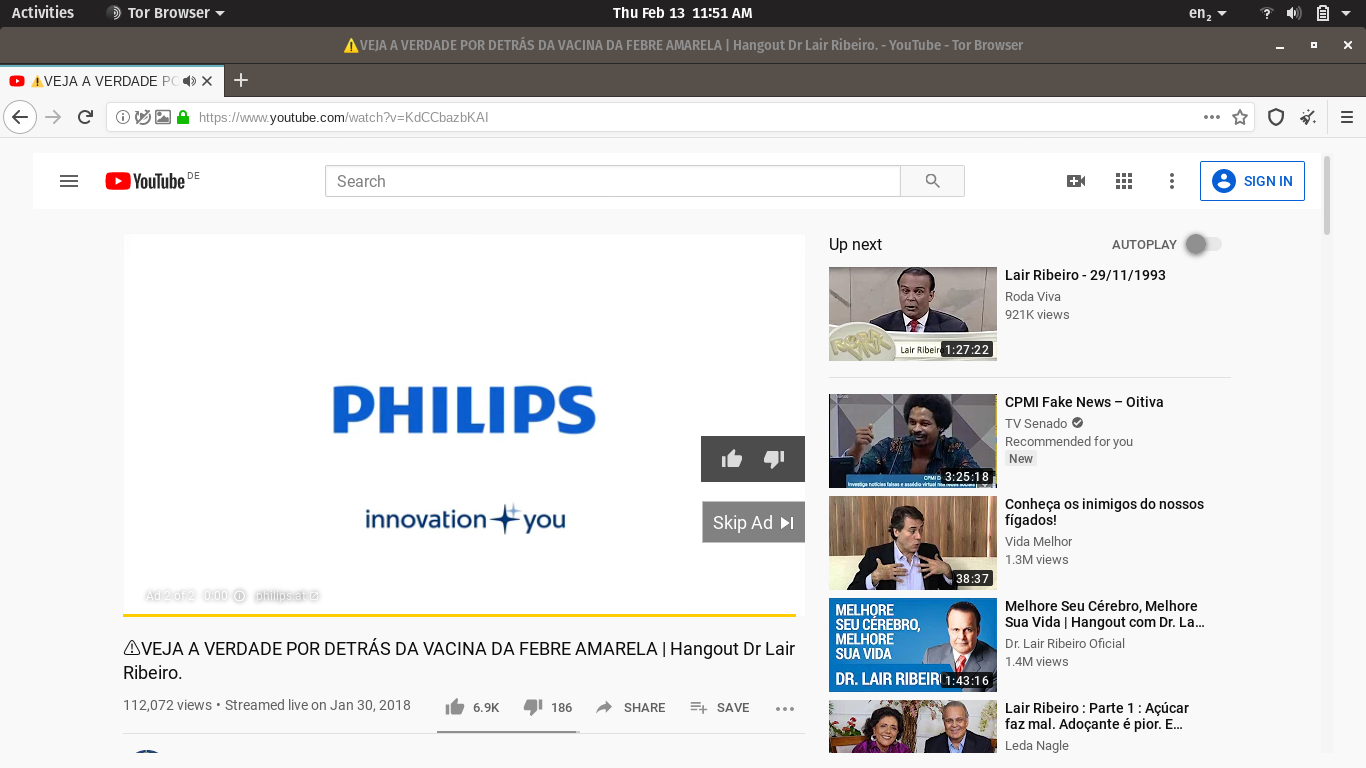

Supplement: Supplementary file 5 [file 25261583 › yt_recommendation/screenshots_m&d/KdCCbazbKAI_9.png]

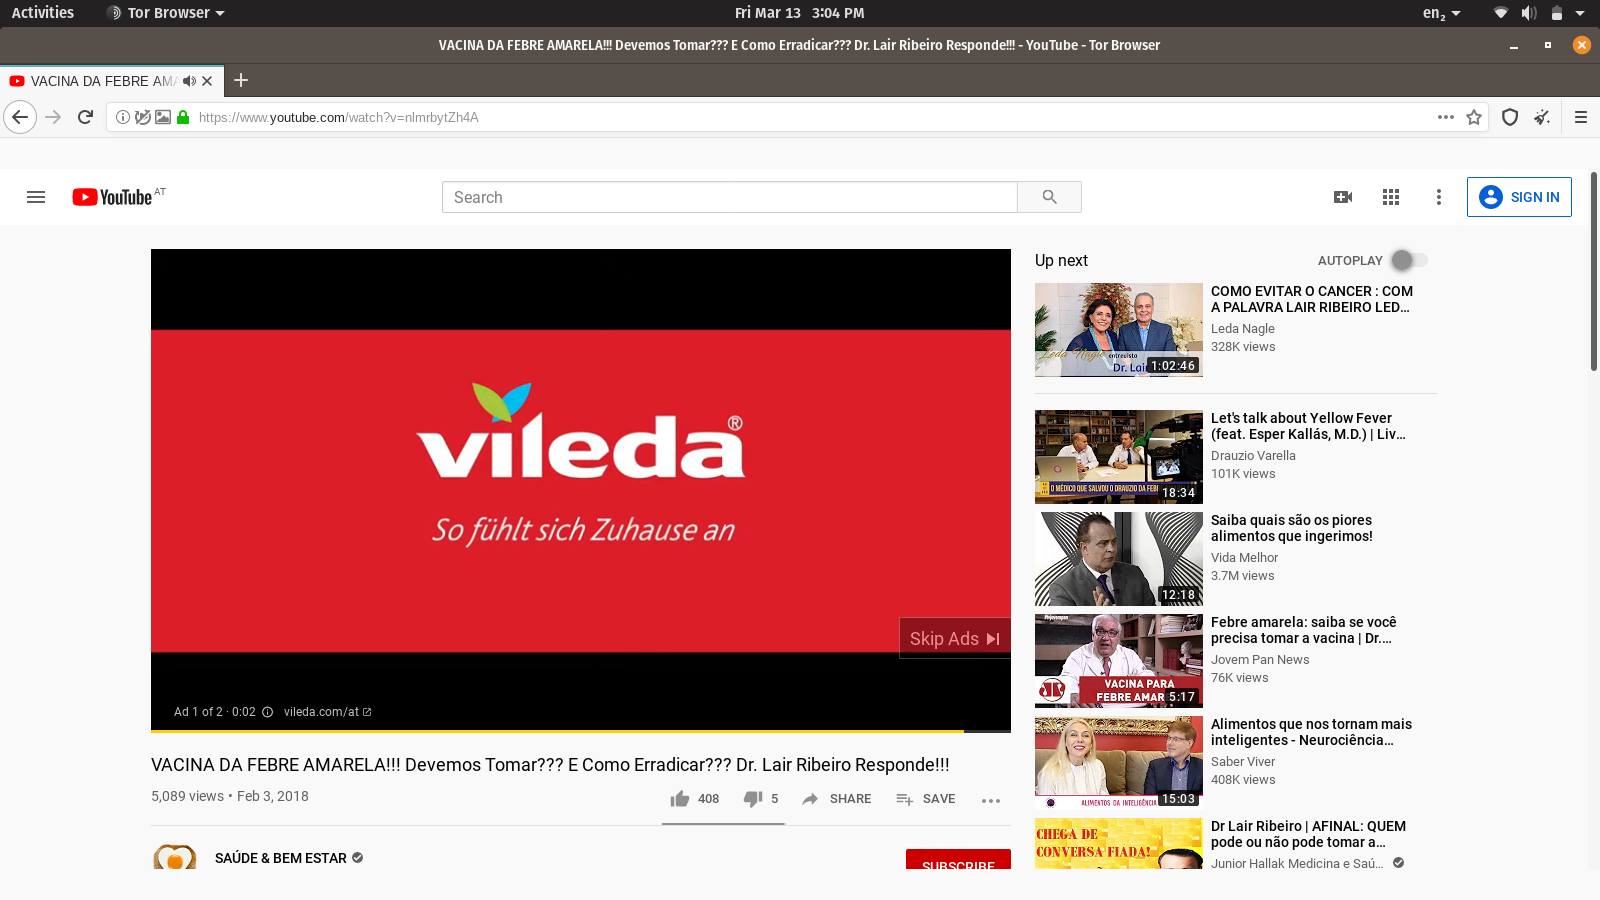

Supplement: Supplementary file 5 [file 25261583 › yt_recommendation/screenshots_m&d/nlmrbytZh4A_1.png]

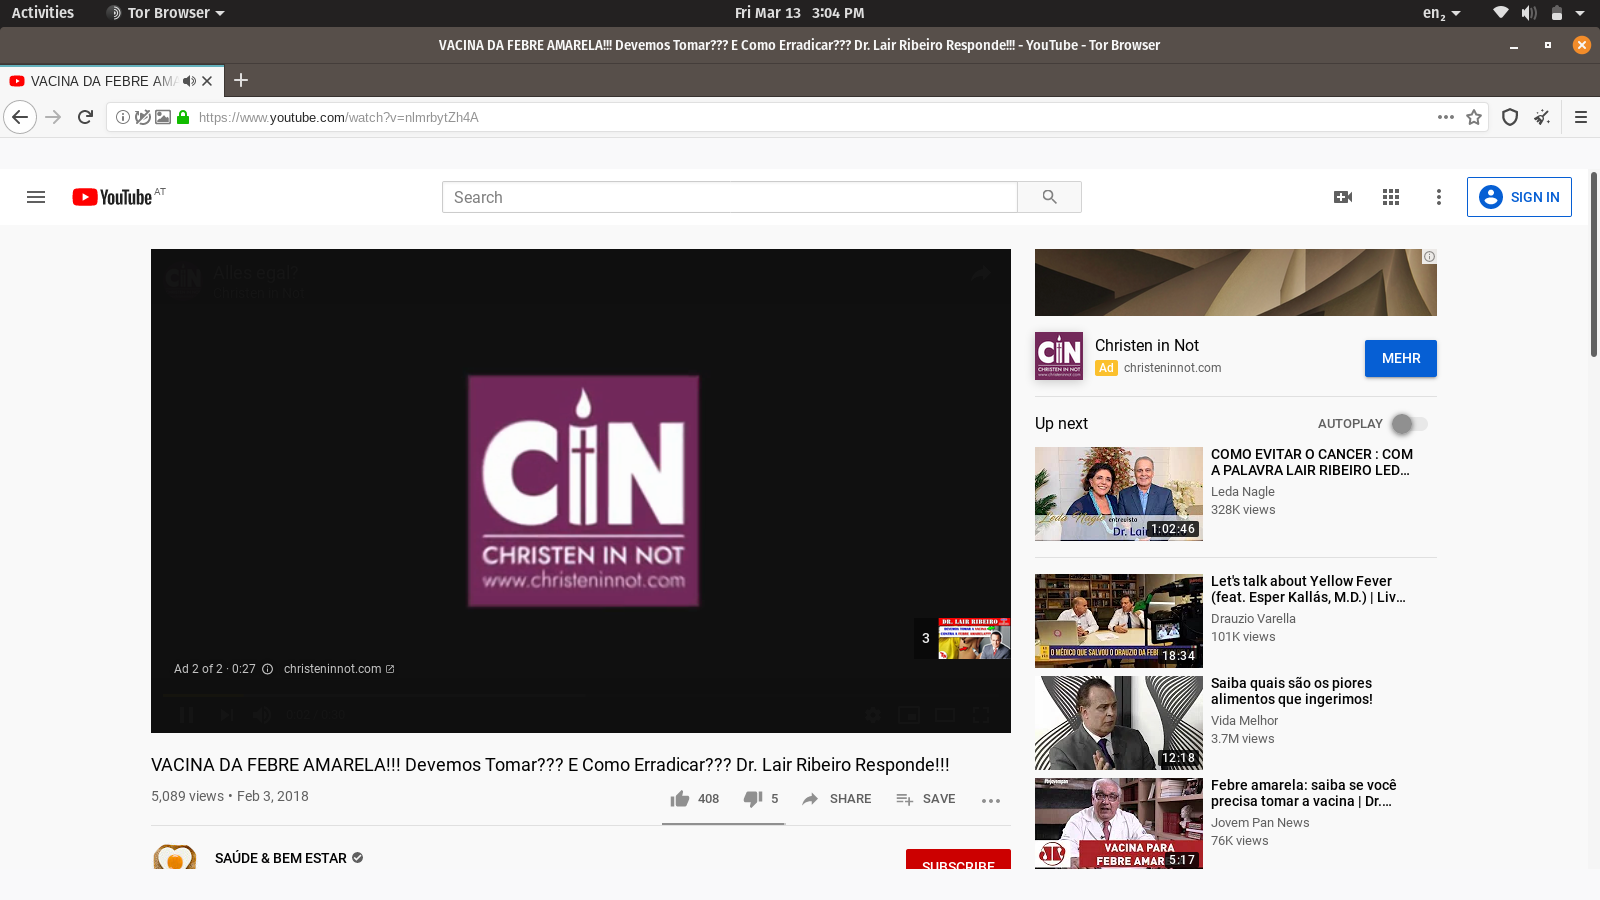

Supplement: Supplementary file 5 [file 25261583 › yt_recommendation/screenshots_m&d/nlmrbytZh4A_2.png]

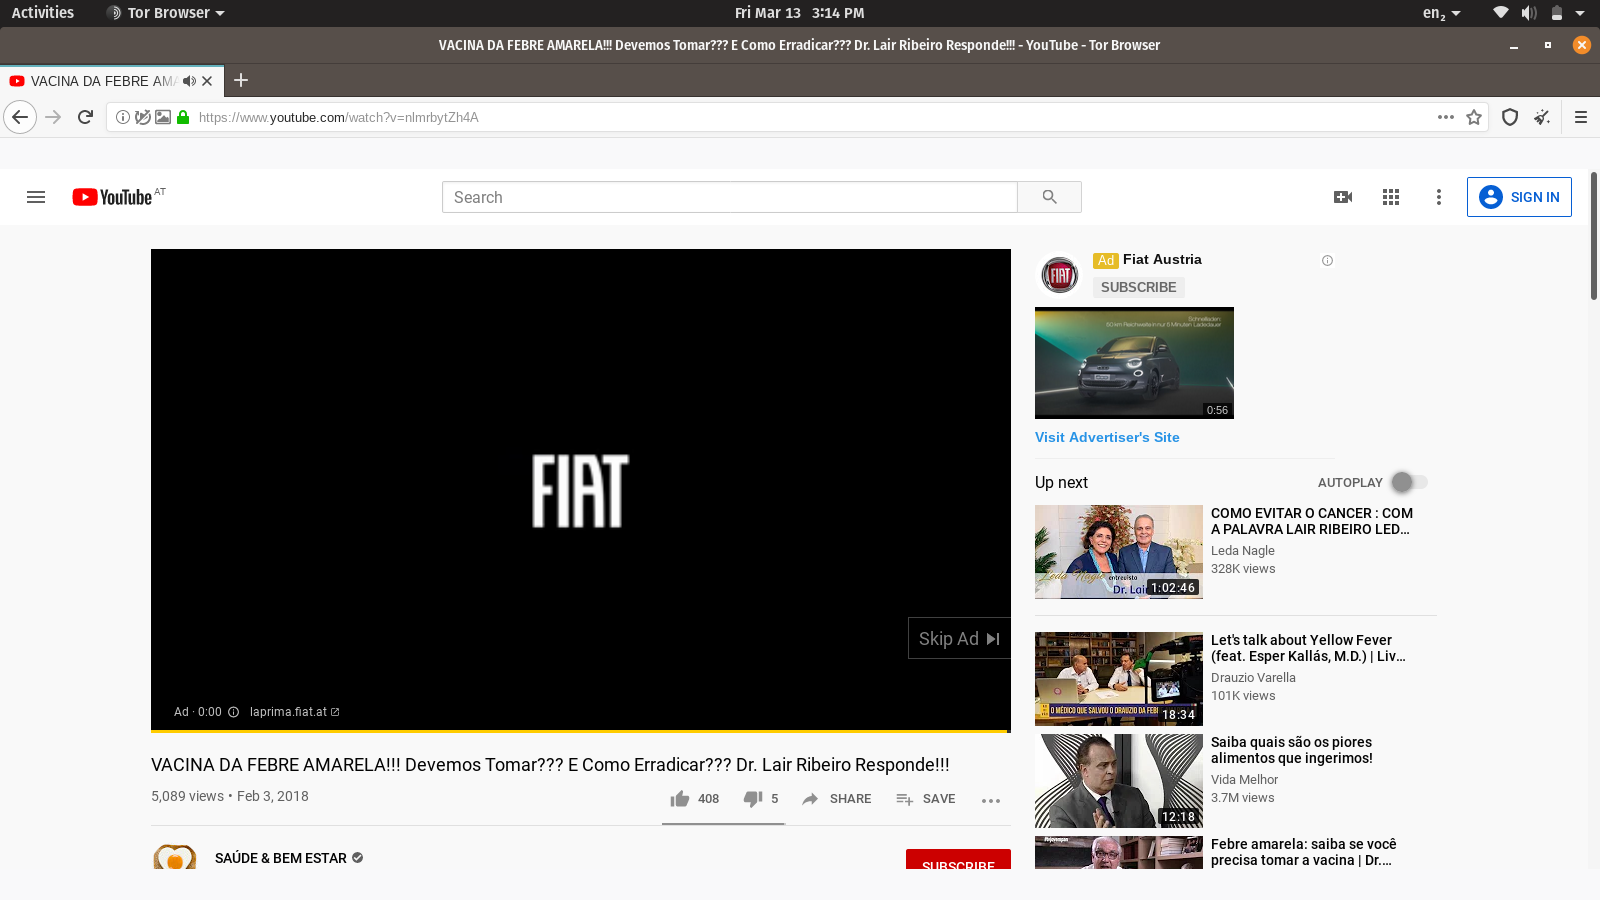

Supplement: Supplementary file 5 [file 25261583 › yt_recommendation/screenshots_m&d/nlmrbytZh4A_3.png]

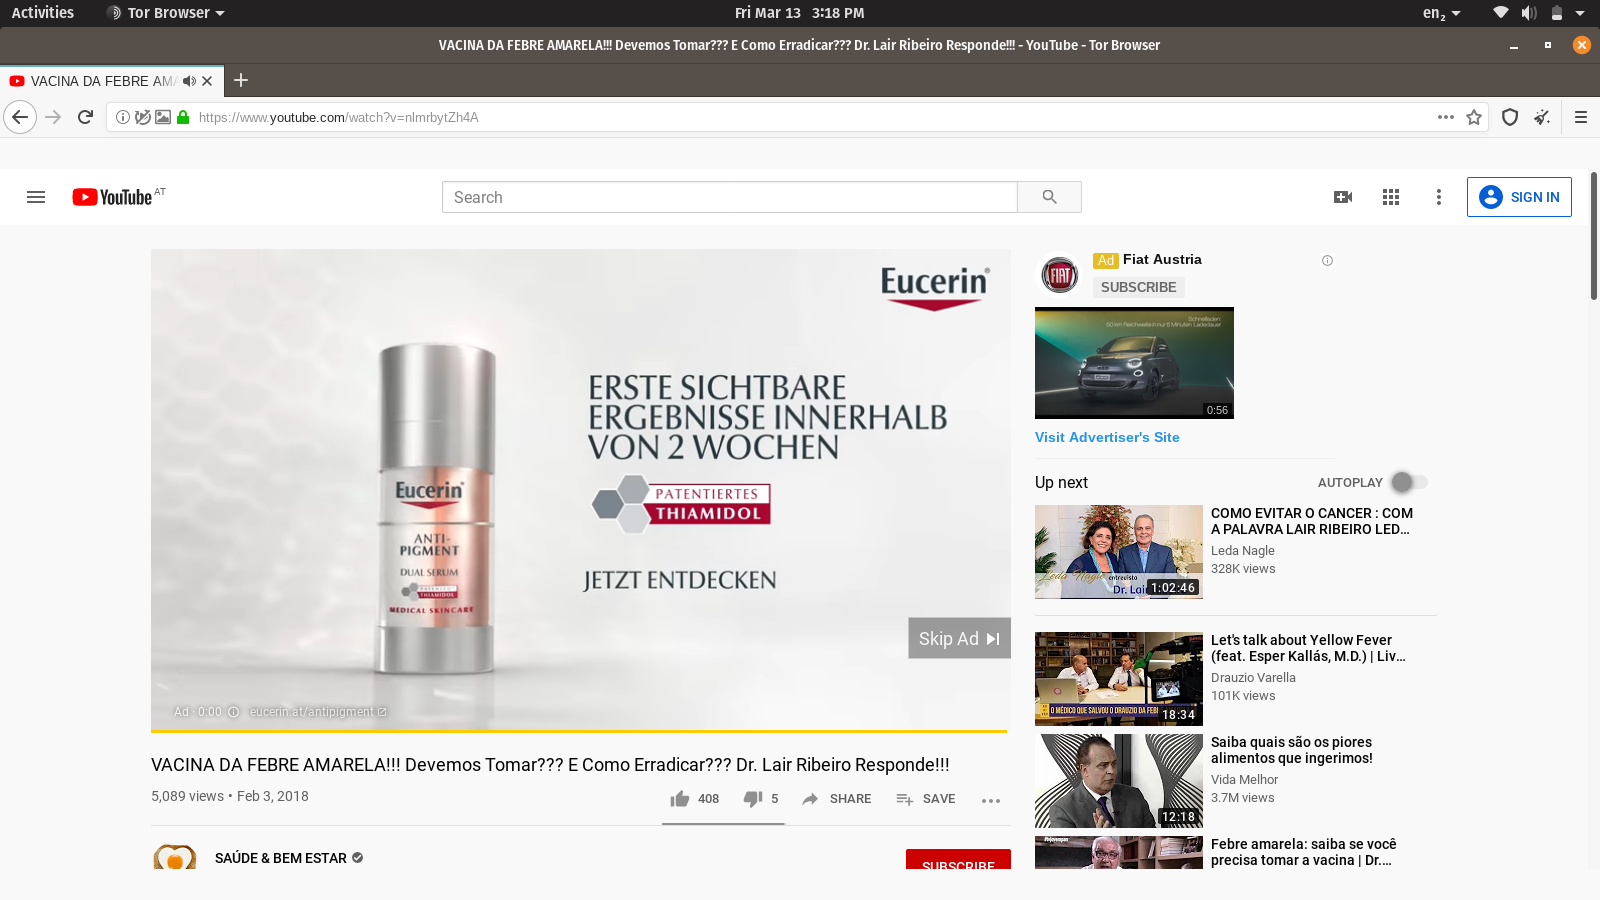

Supplement: Supplementary file 5 [file 25261583 › yt_recommendation/screenshots_m&d/nlmrbytZh4A_4.png]

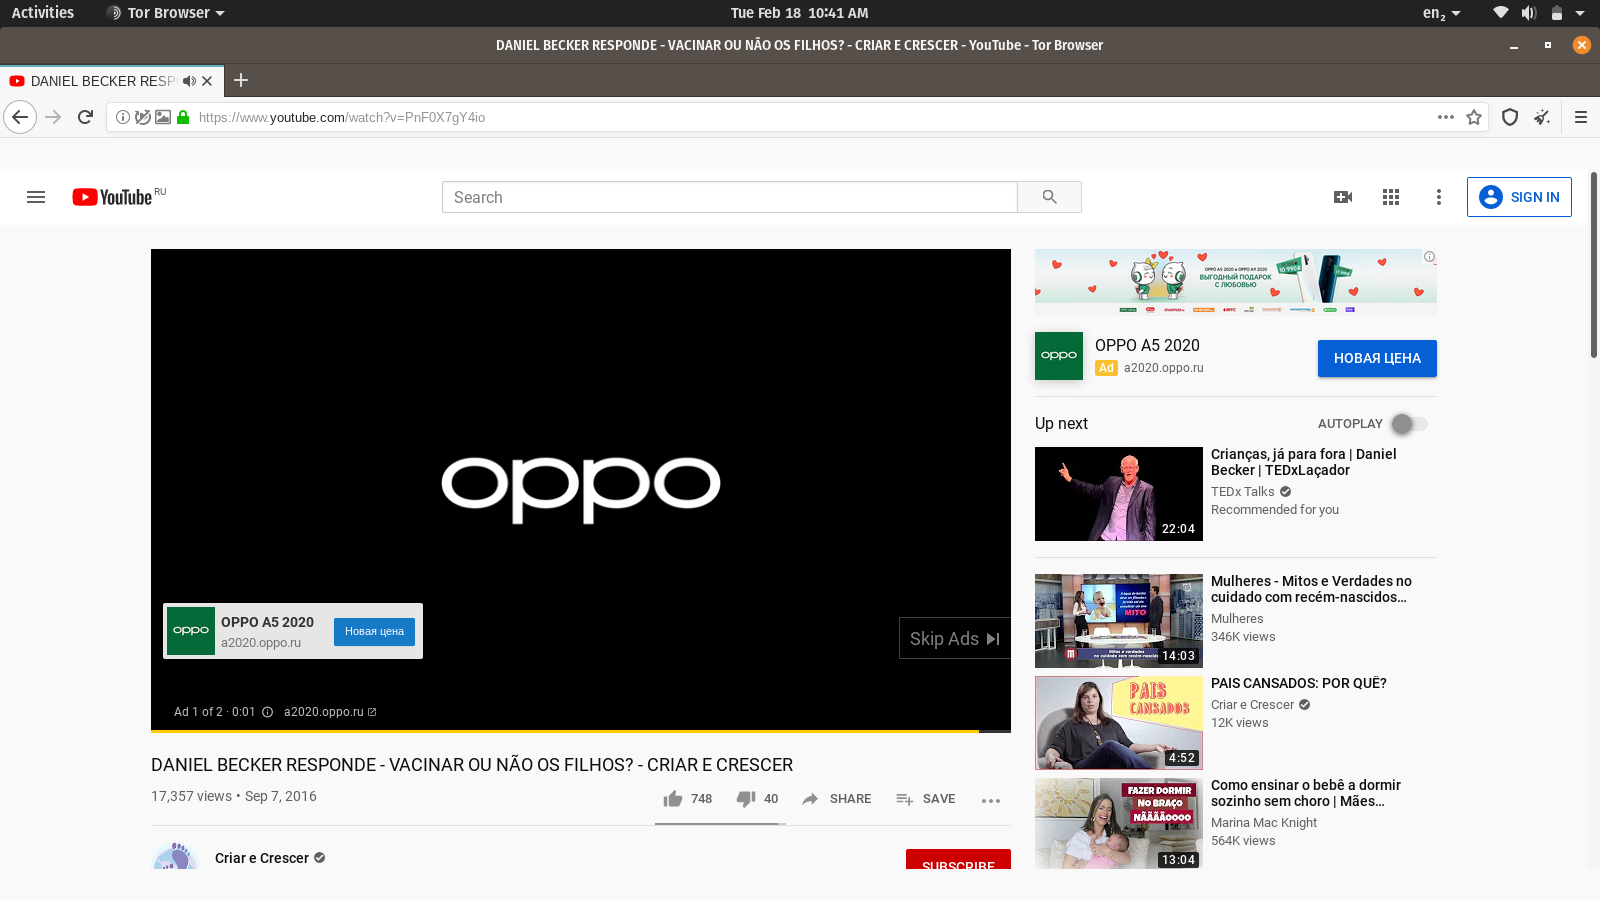

Supplement: Supplementary file 5 [file 25261583 › yt_recommendation/screenshots_m&d/PnF0X7gY4io_1.png]

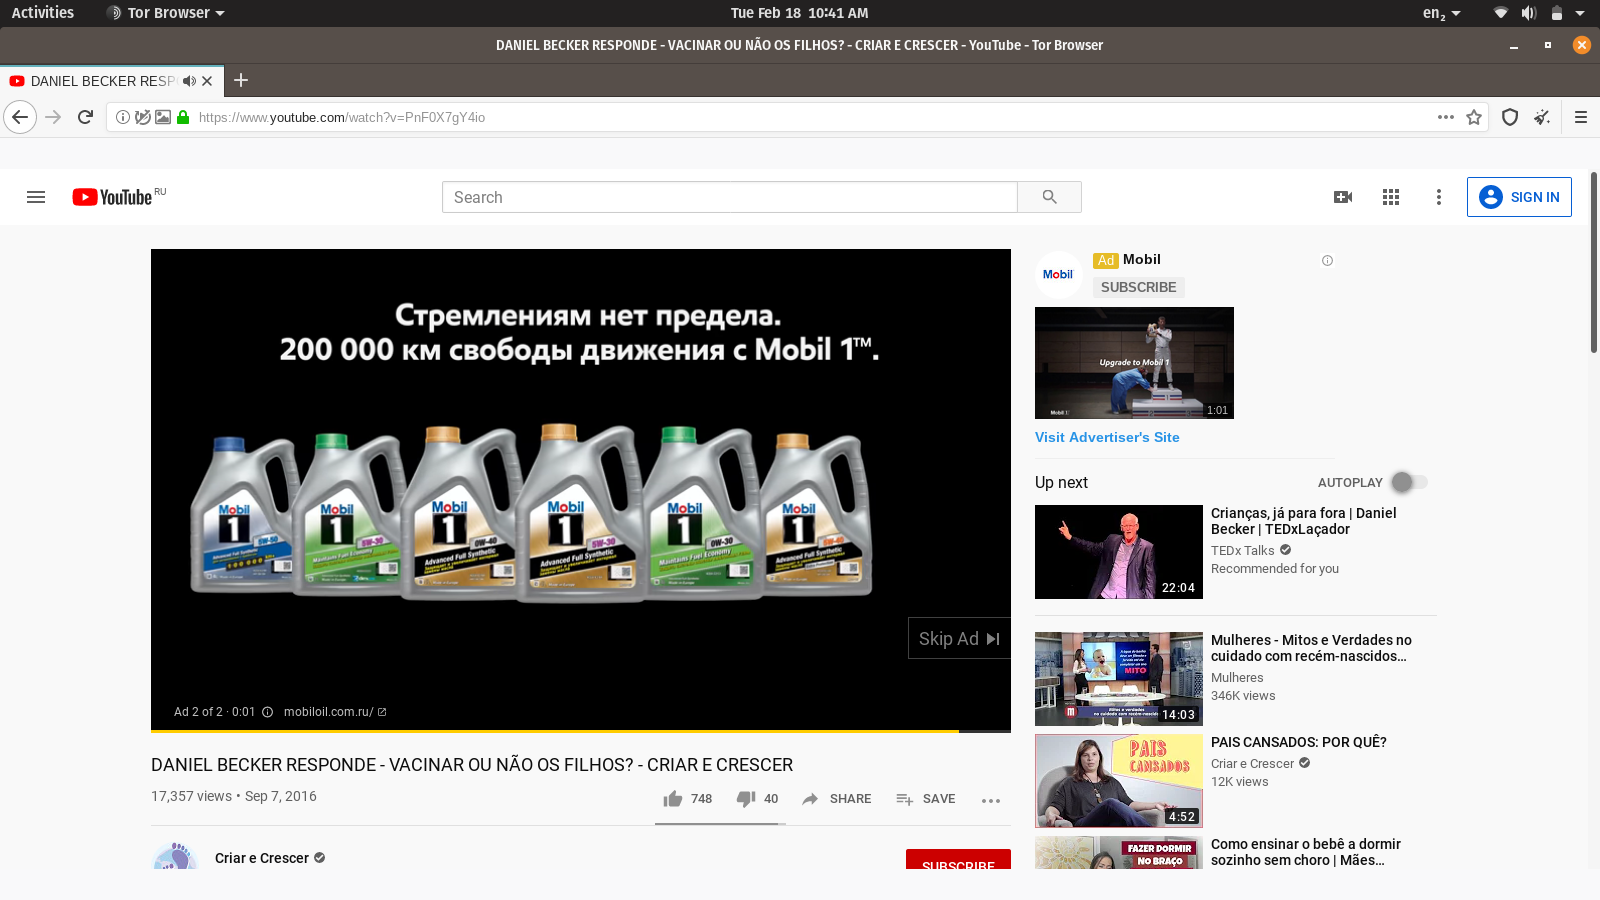

Supplement: Supplementary file 5 [file 25261583 › yt_recommendation/screenshots_m&d/PnF0X7gY4io_2.png]

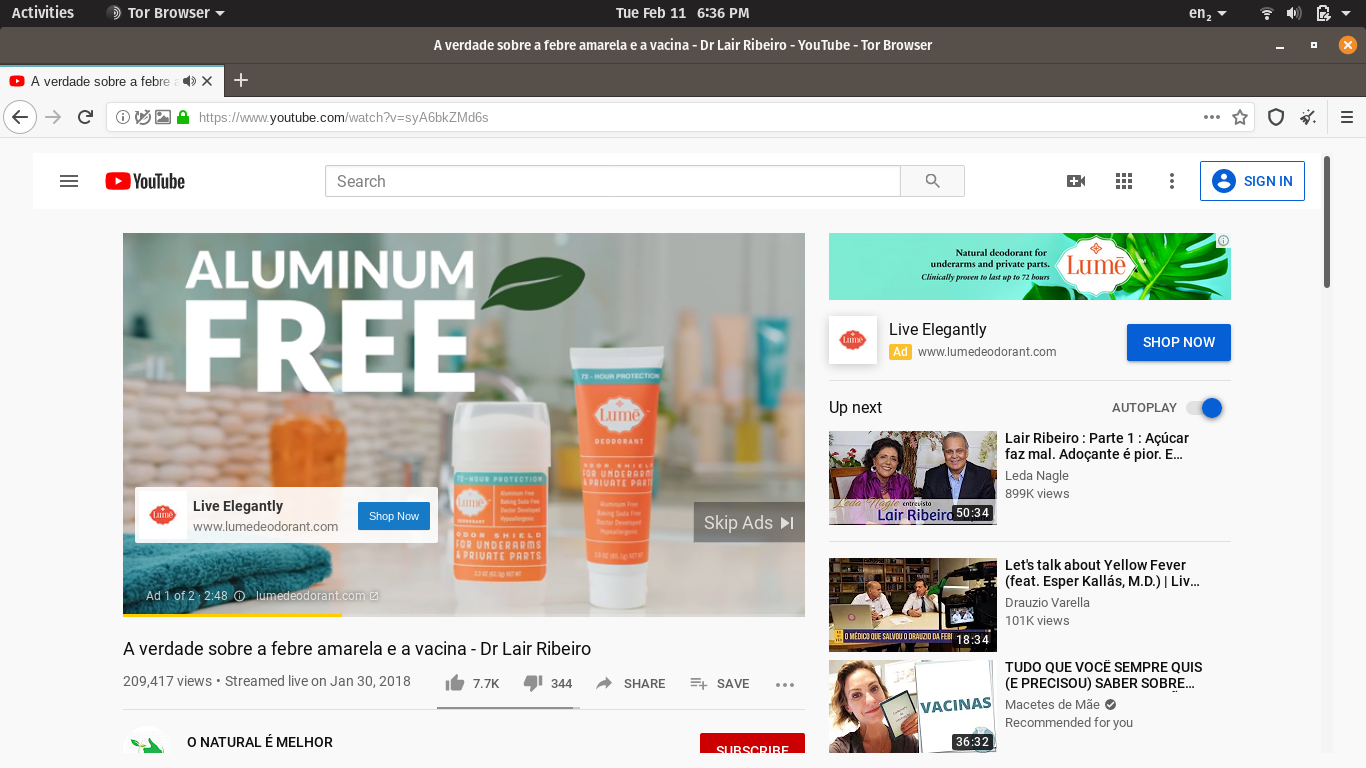

Supplement: Supplementary file 5 [file 25261583 › yt_recommendation/screenshots_m&d/syA6bkZMd6s_1.png]

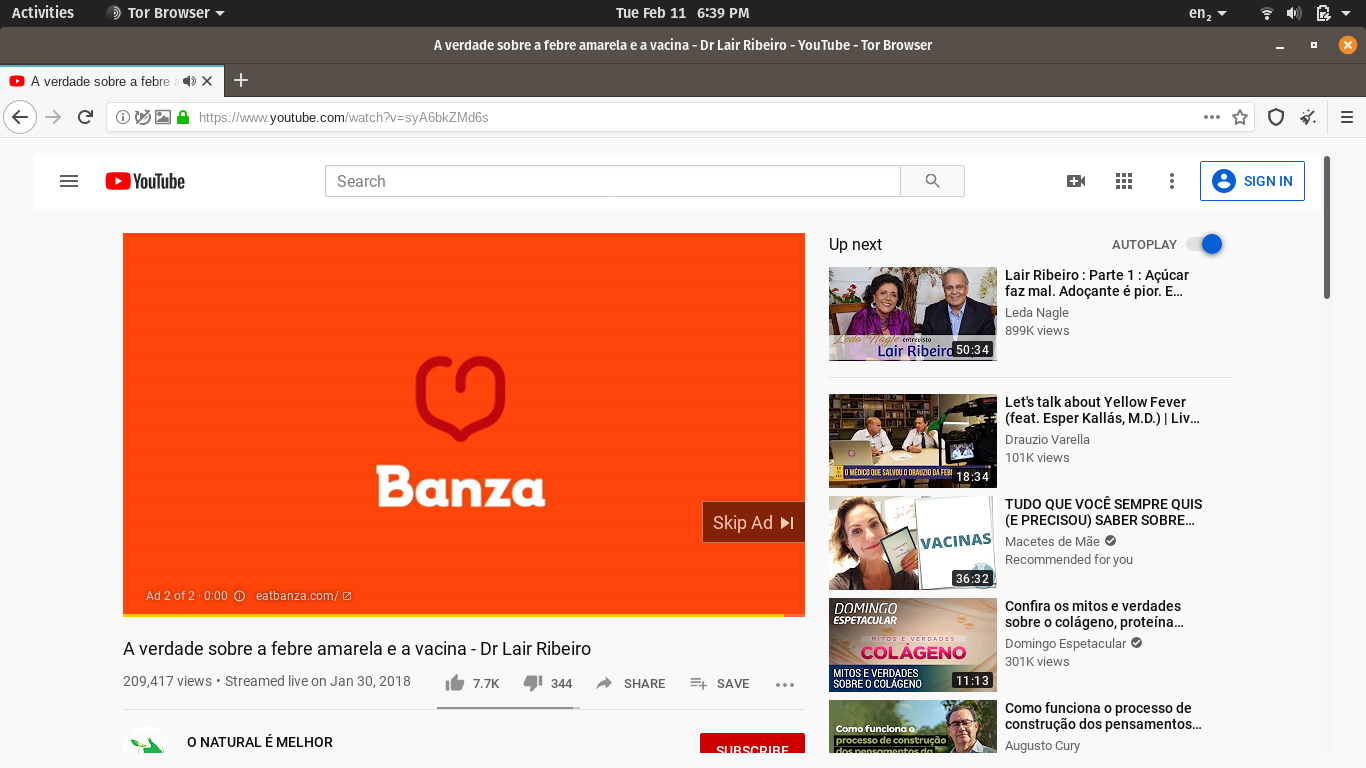

Supplement: Supplementary file 5 [file 25261583 › yt_recommendation/screenshots_m&d/syA6bkZMd6s_2.png]

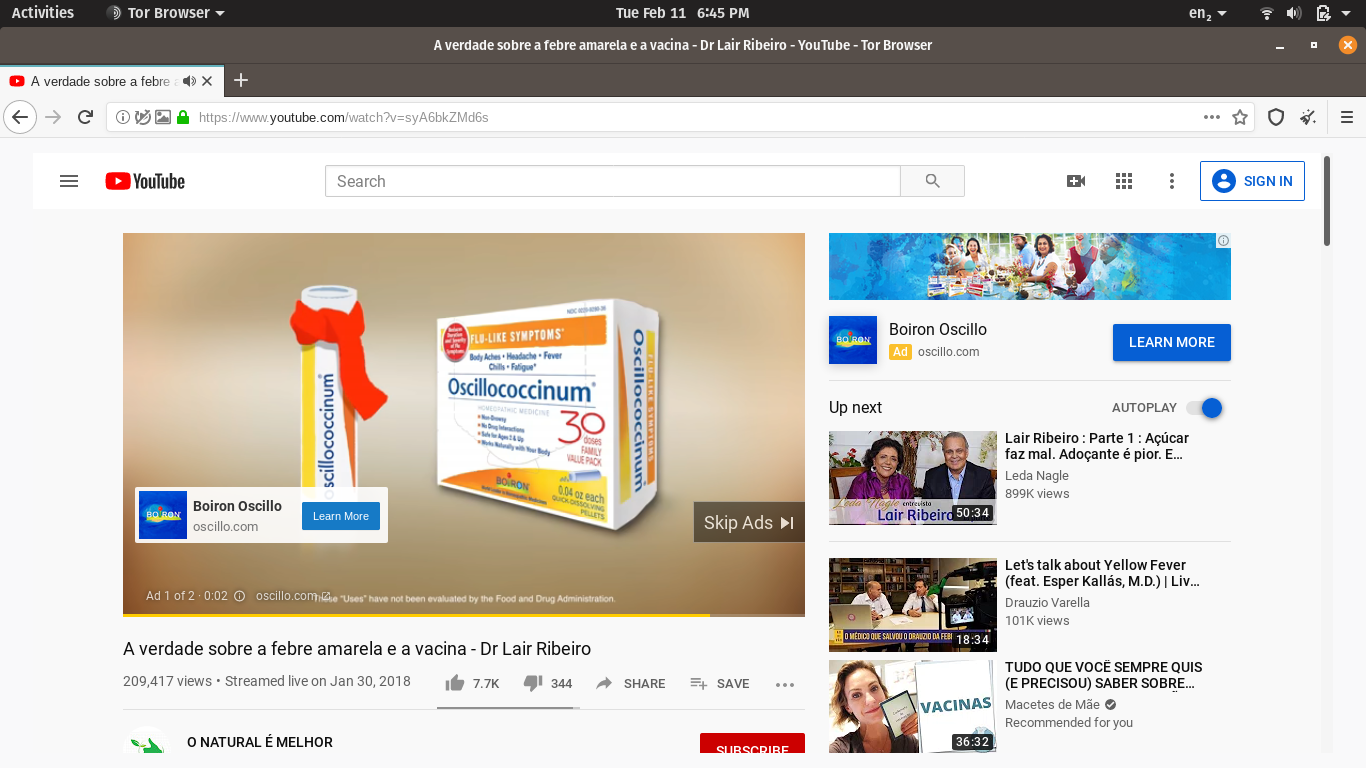

Supplement: Supplementary file 5 [file 25261583 › yt_recommendation/screenshots_m&d/syA6bkZMd6s_3.png]

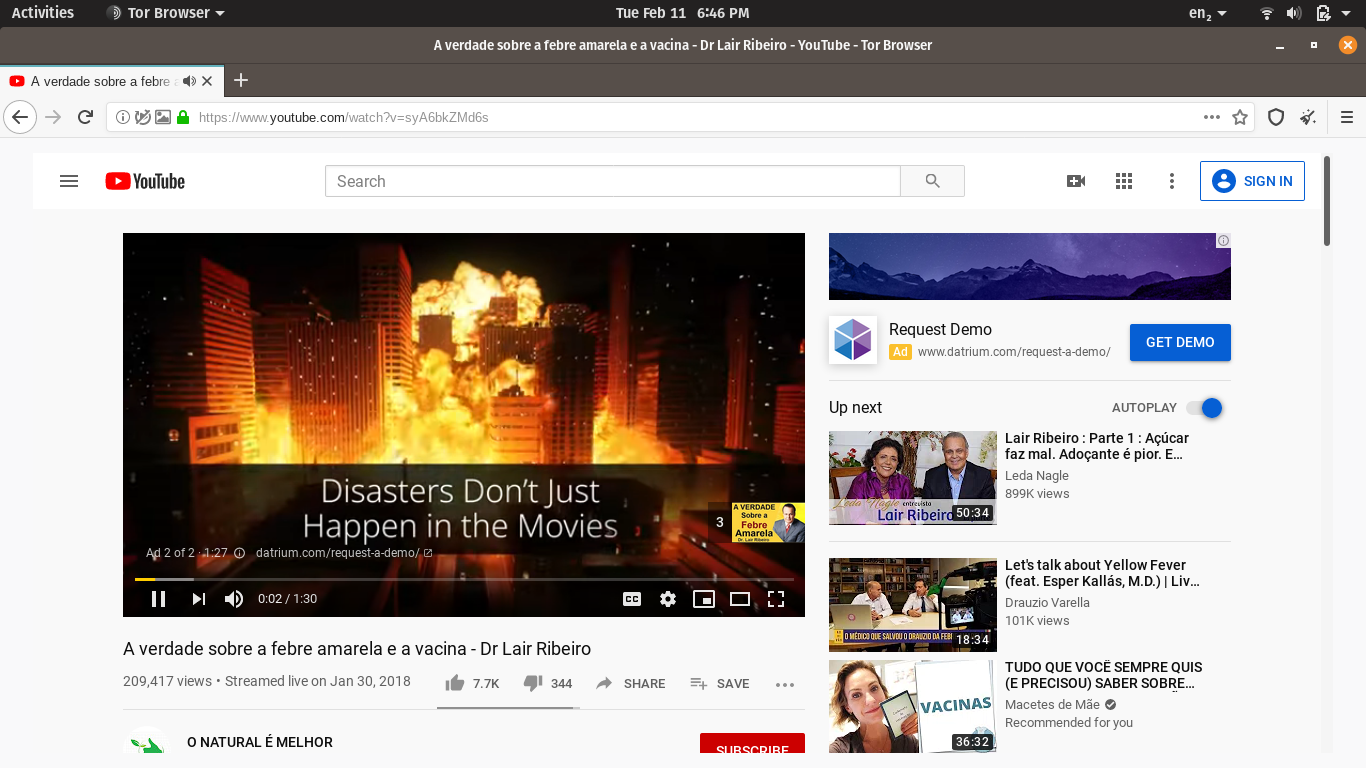

Supplement: Supplementary file 5 [file 25261583 › yt_recommendation/screenshots_m&d/syA6bkZMd6s_4.png]

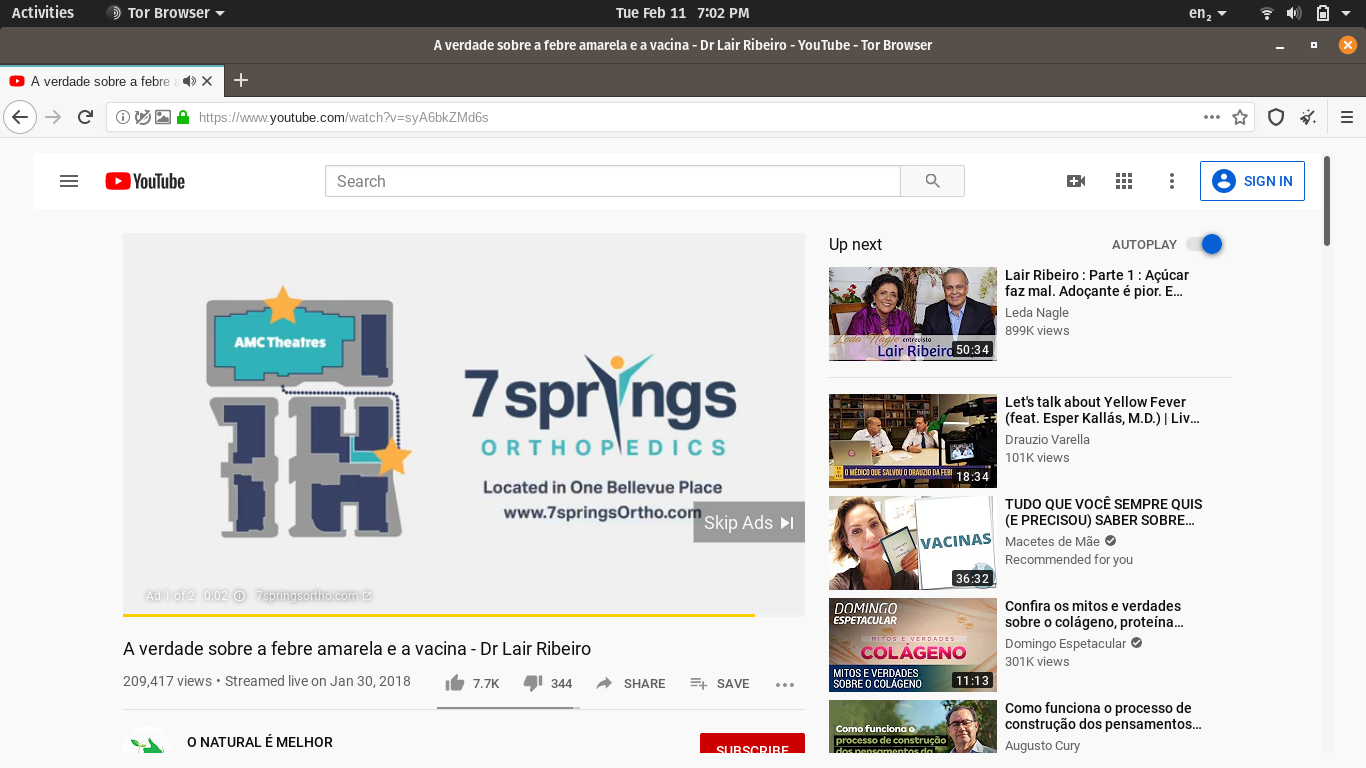

Supplement: Supplementary file 5 [file 25261583 › yt_recommendation/screenshots_m&d/syA6bkZMd6s_5.png]

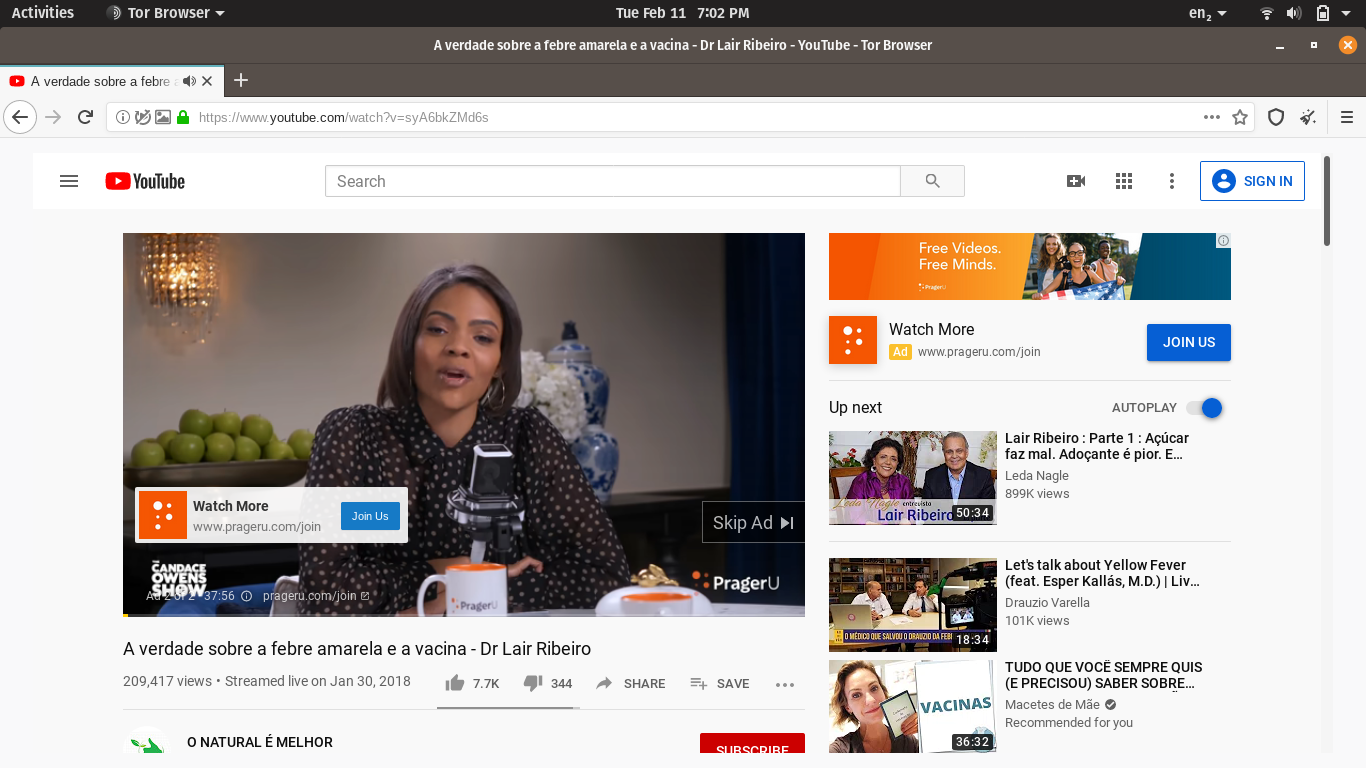

Supplement: Supplementary file 5 [file 25261583 › yt_recommendation/screenshots_m&d/syA6bkZMd6s_6.png]

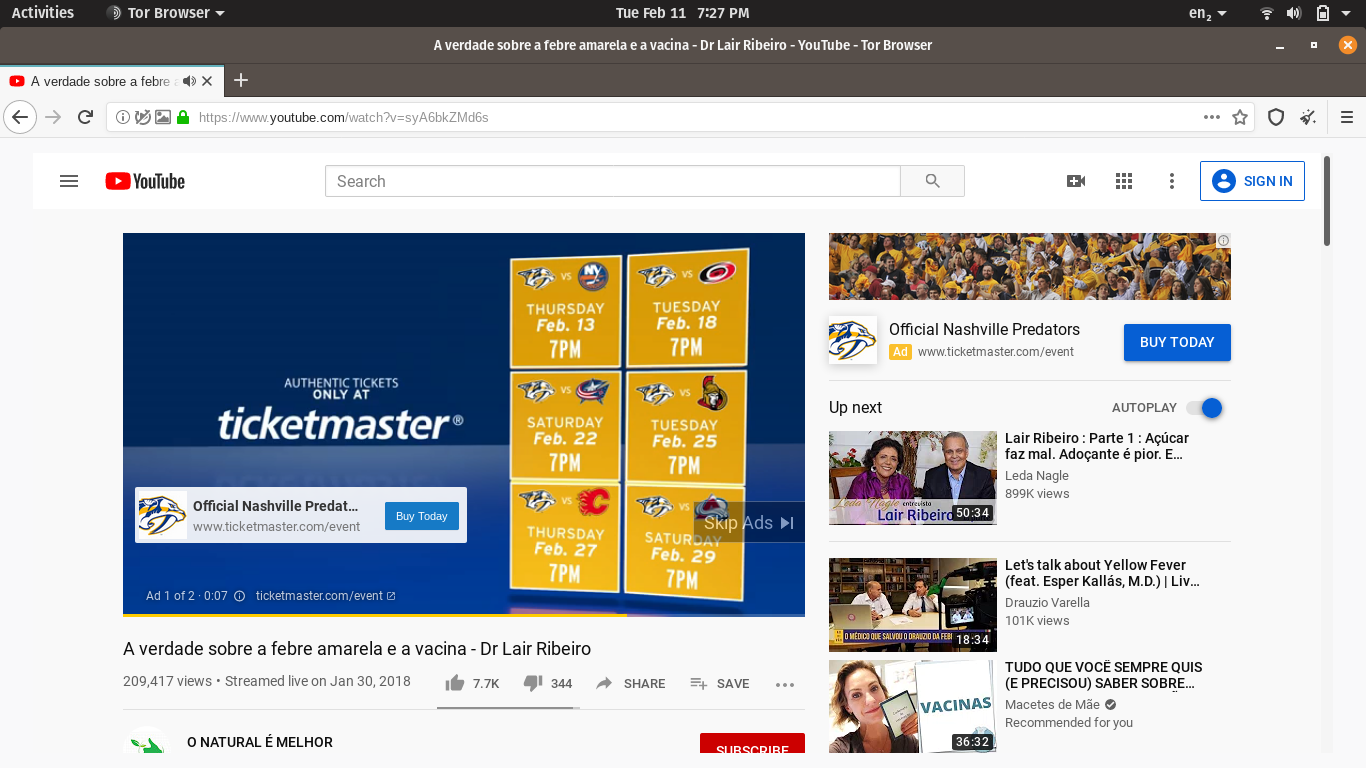

Supplement: Supplementary file 5 [file 25261583 › yt_recommendation/screenshots_m&d/syA6bkZMd6s_7.png]

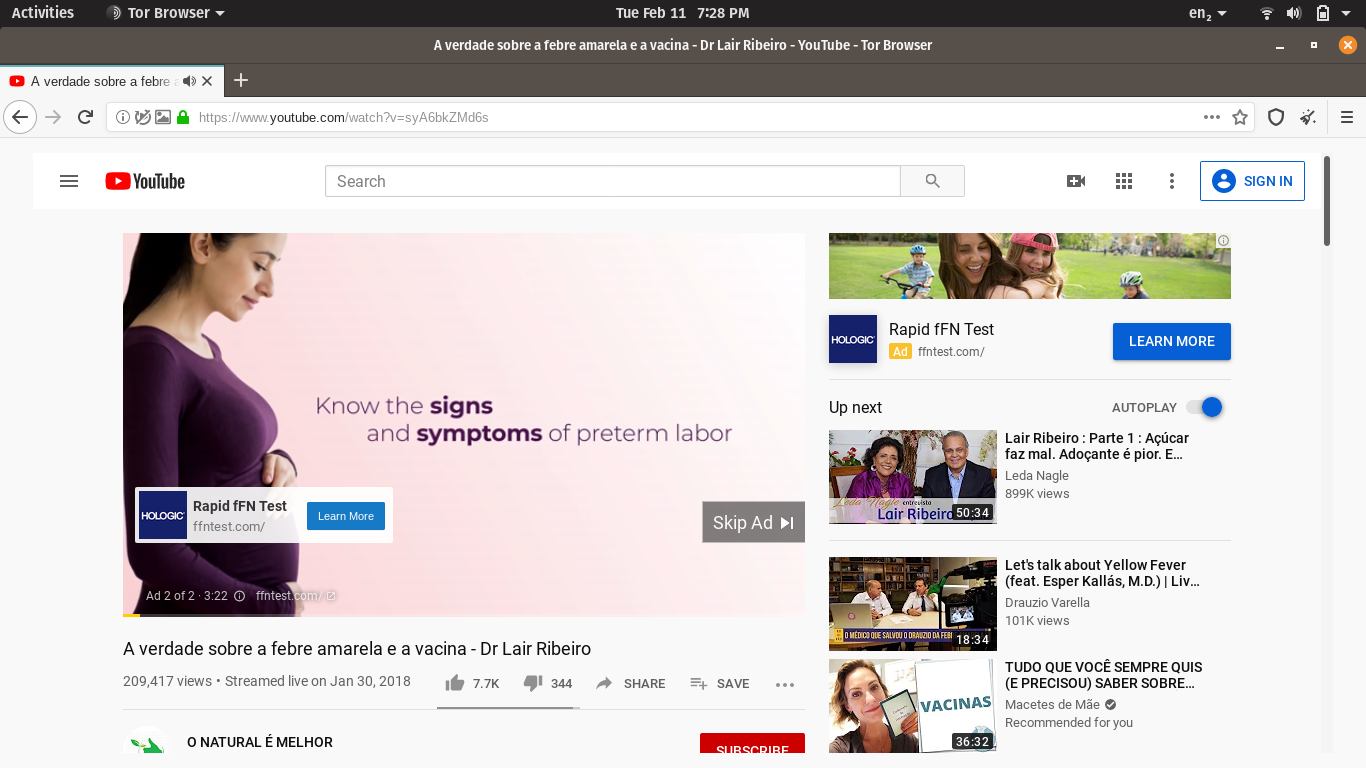

Supplement: Supplementary file 5 [file 25261583 › yt_recommendation/screenshots_m&d/syA6bkZMd6s_8.png]

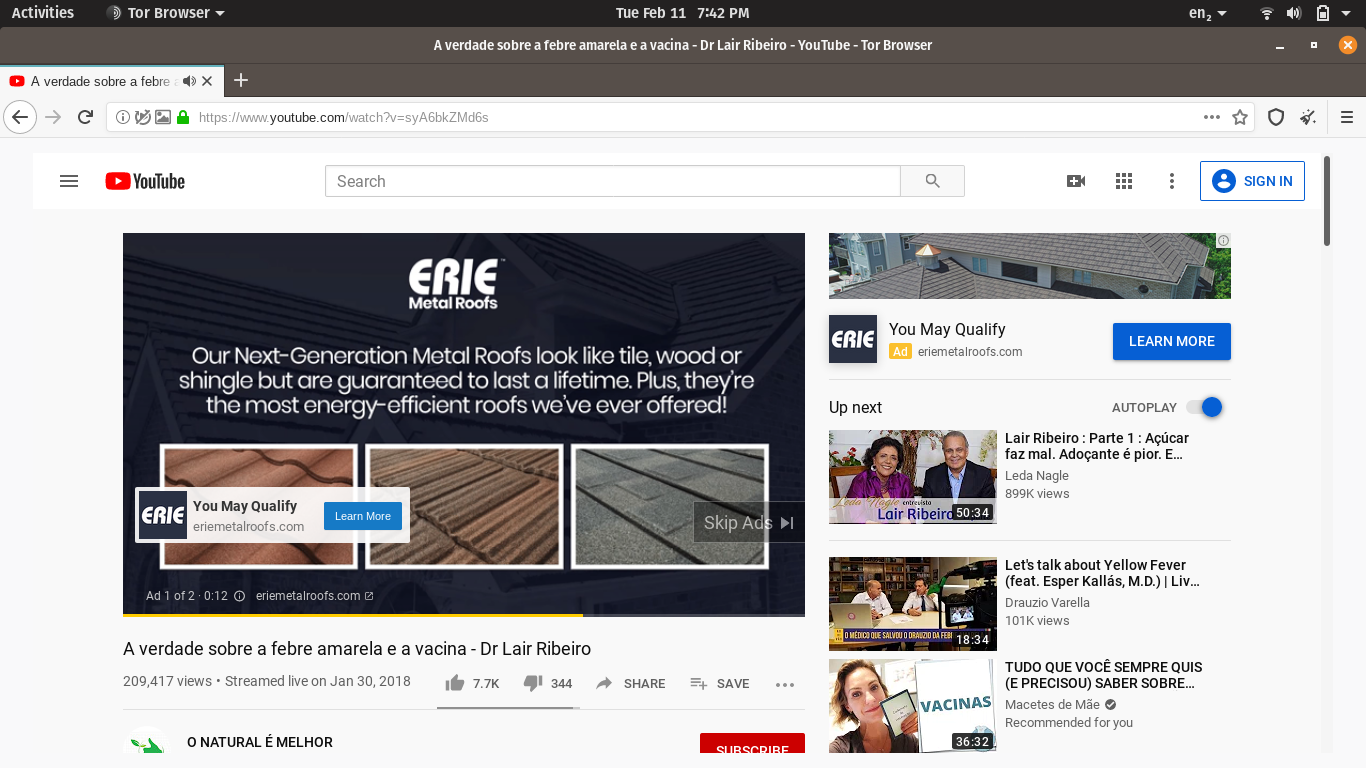

Supplement: Supplementary file 5 [file 25261583 › yt_recommendation/screenshots_m&d/syA6bkZMd6s_9.png]

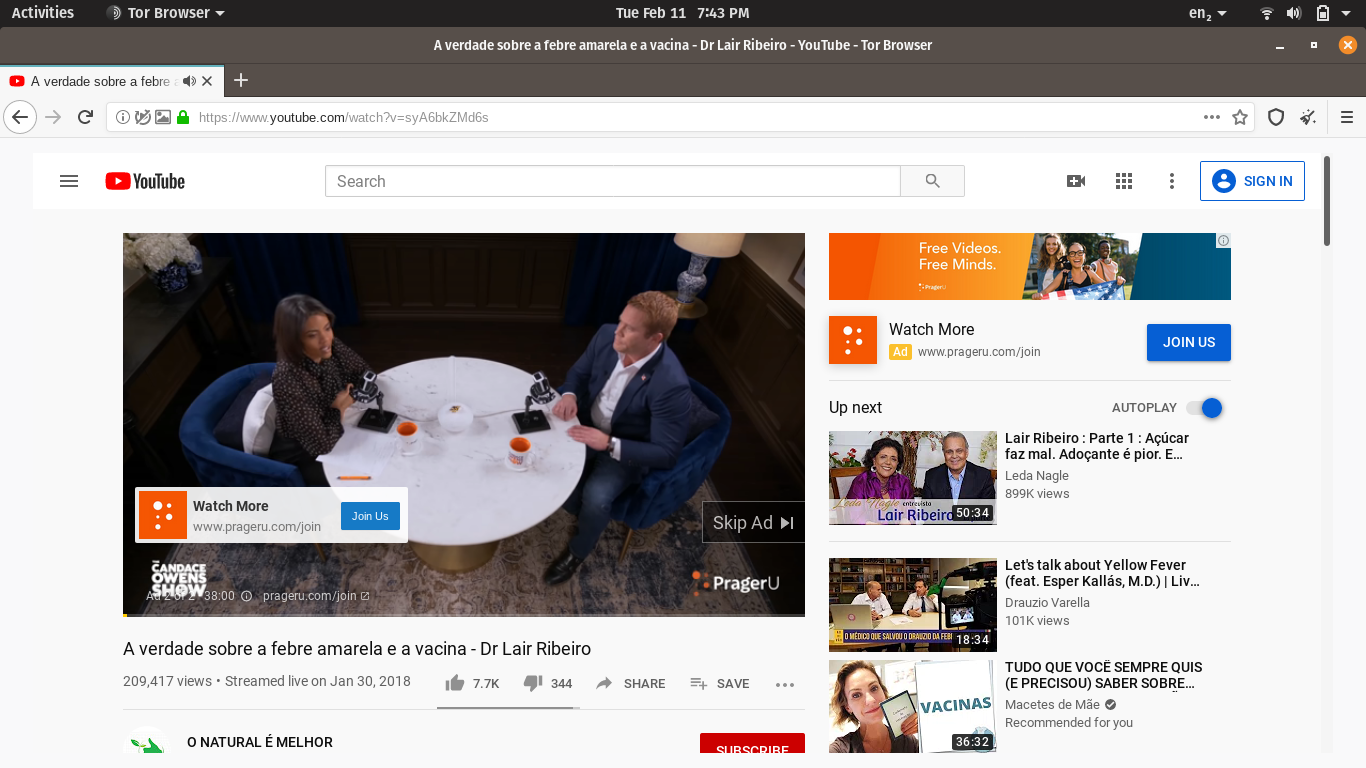

Supplement: Supplementary file 5 [file 25261583 › yt_recommendation/screenshots_m&d/syA6bkZMd6s_10.png]

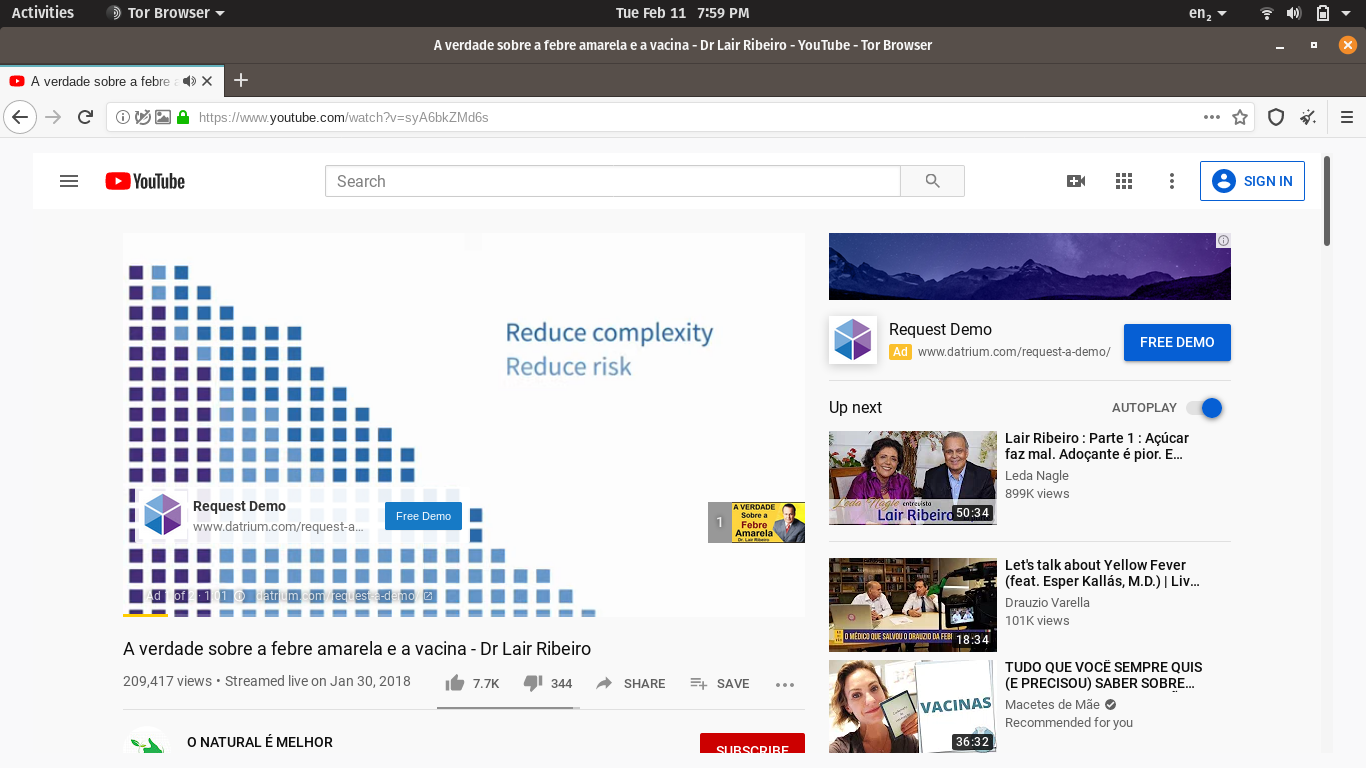

Supplement: Supplementary file 5 [file 25261583 › yt_recommendation/screenshots_m&d/syA6bkZMd6s_11.png]

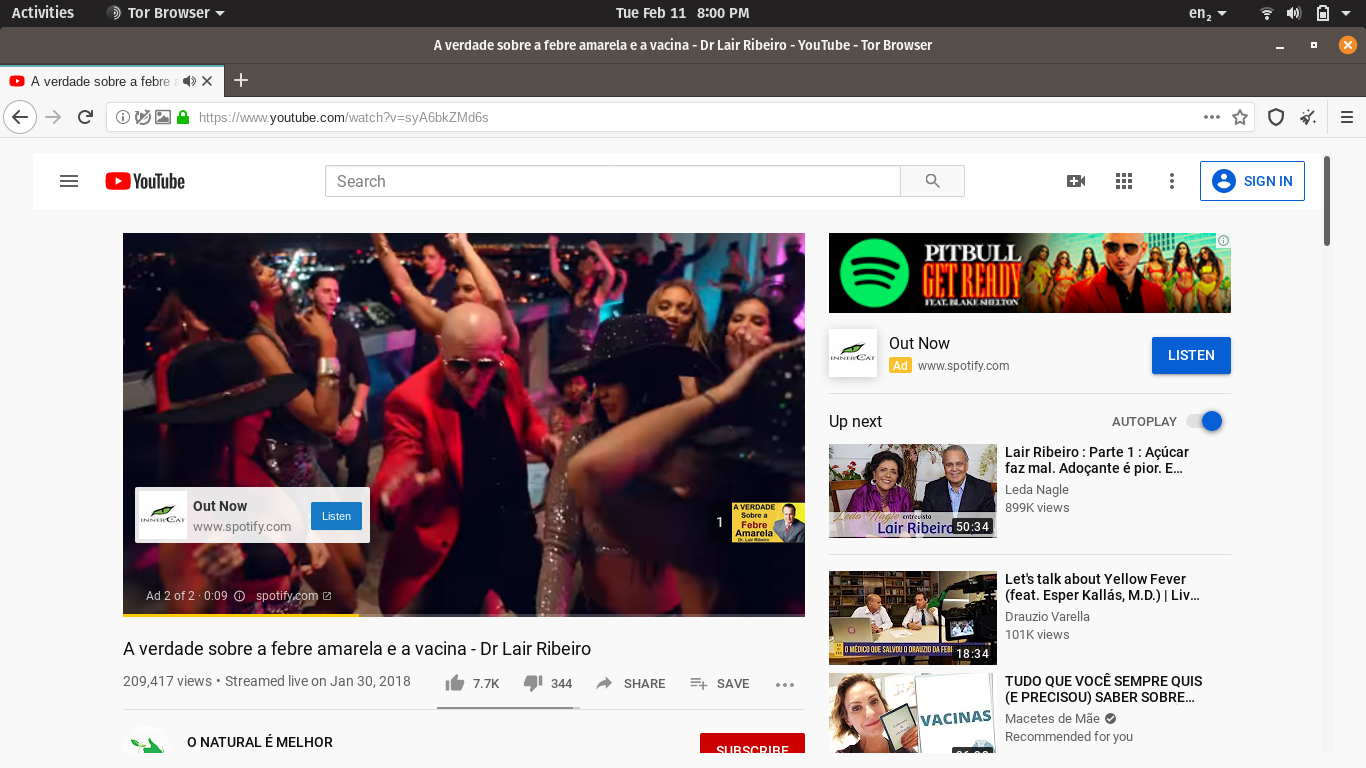

Supplement: Supplementary file 5 [file 25261583 › yt_recommendation/screenshots_m&d/syA6bkZMd6s_12.png]

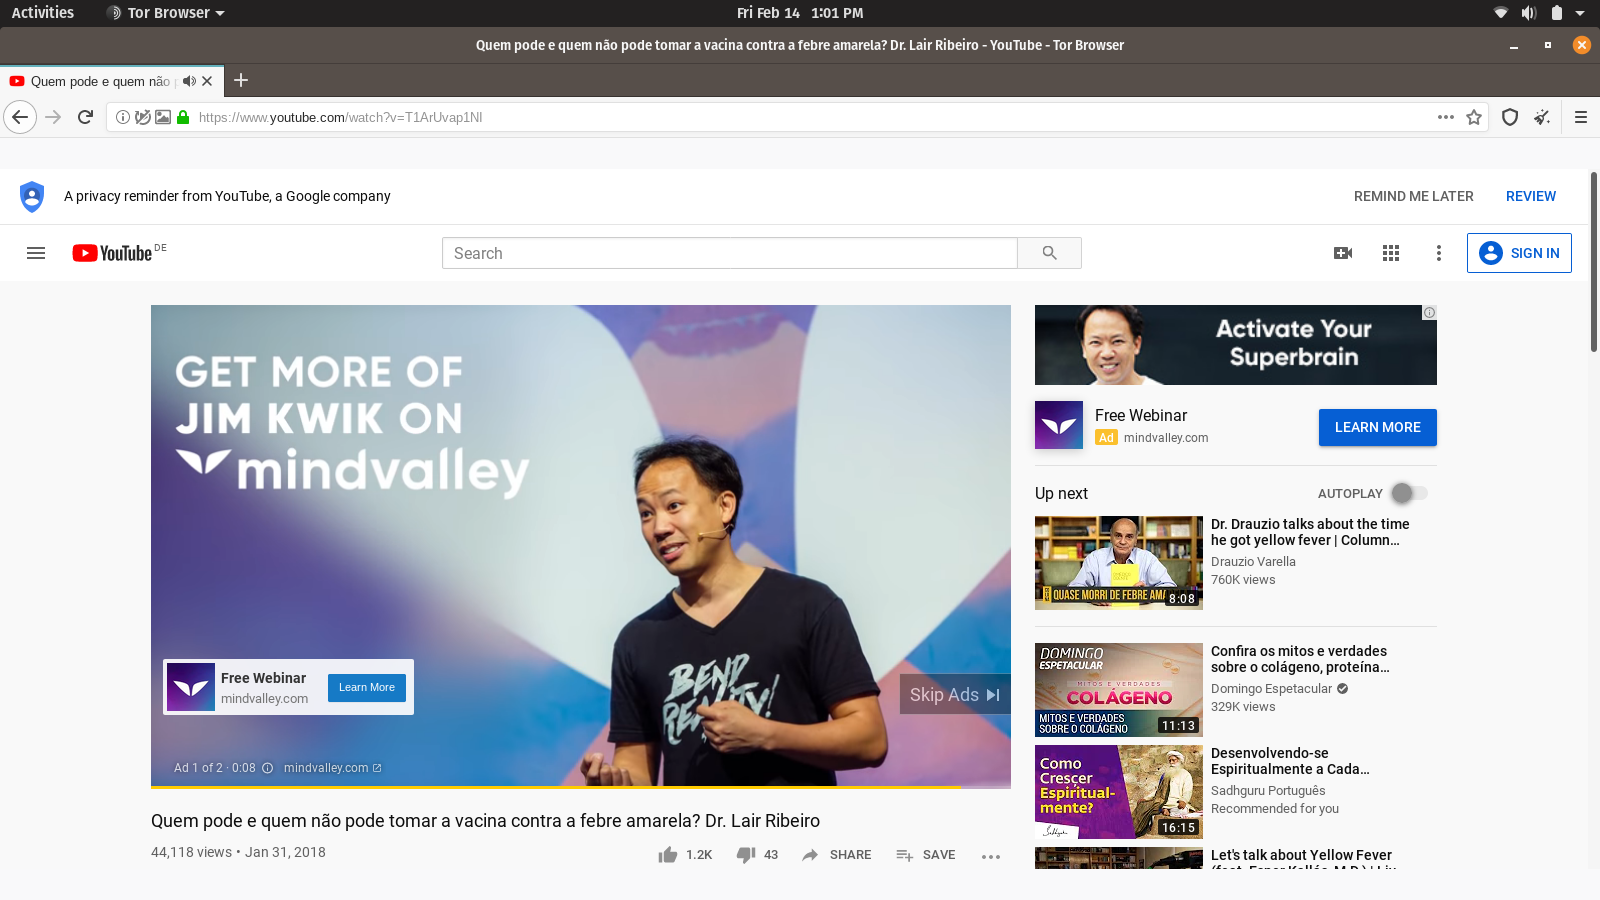

Supplement: Supplementary file 5 [file 25261583 › yt_recommendation/screenshots_m&d/T1ArUvap1NI_1.png]

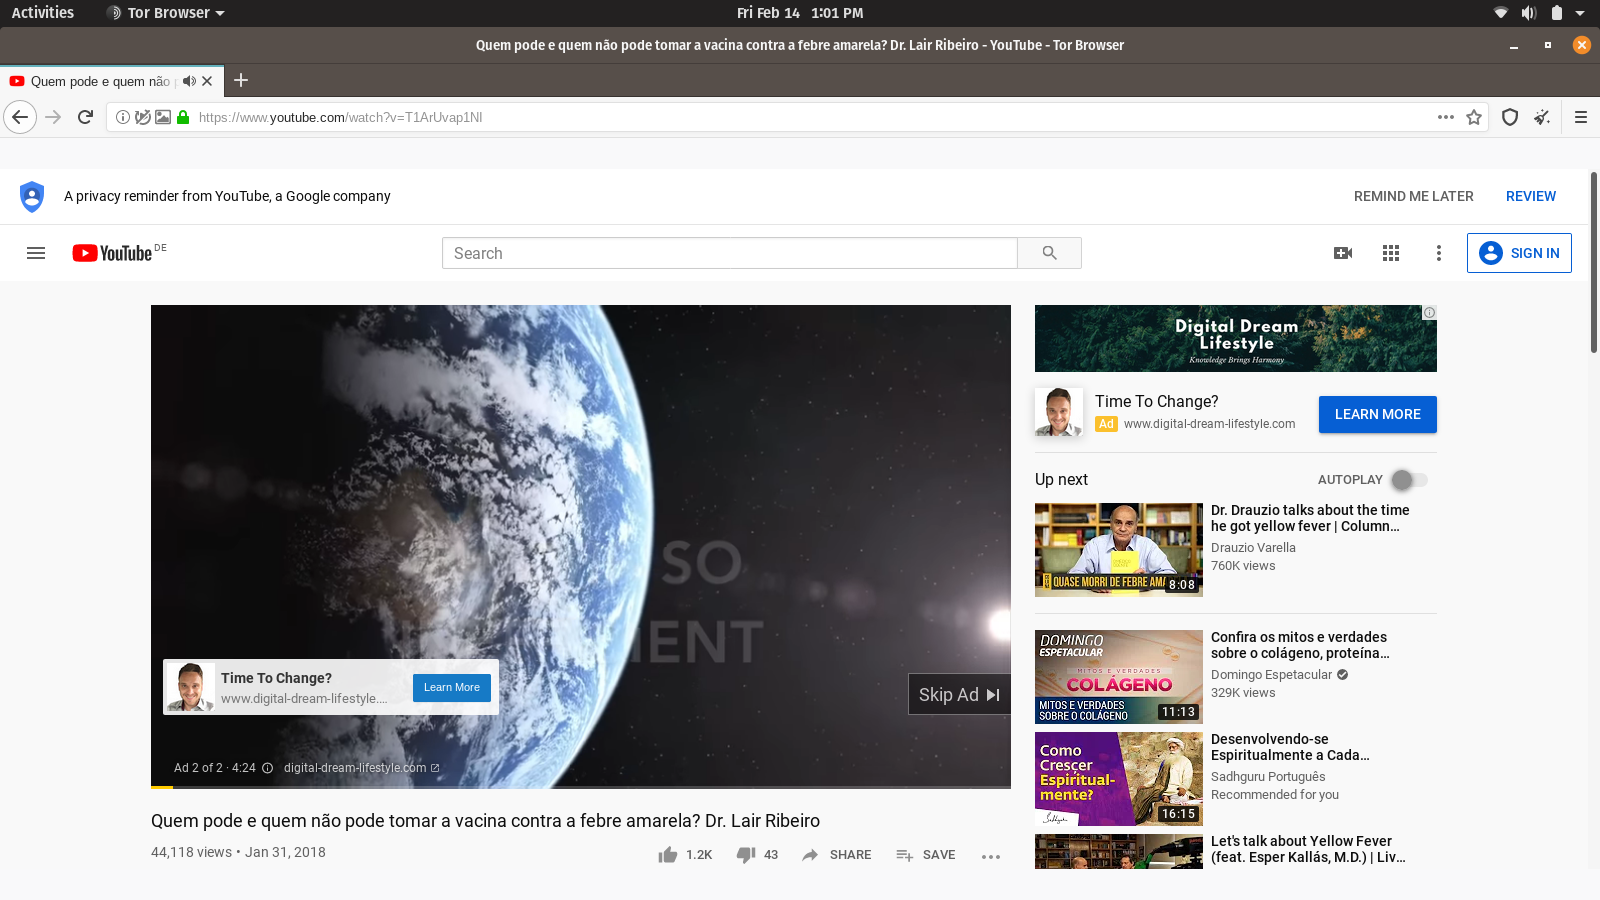

Supplement: Supplementary file 5 [file 25261583 › yt_recommendation/screenshots_m&d/T1ArUvap1NI_2.png]

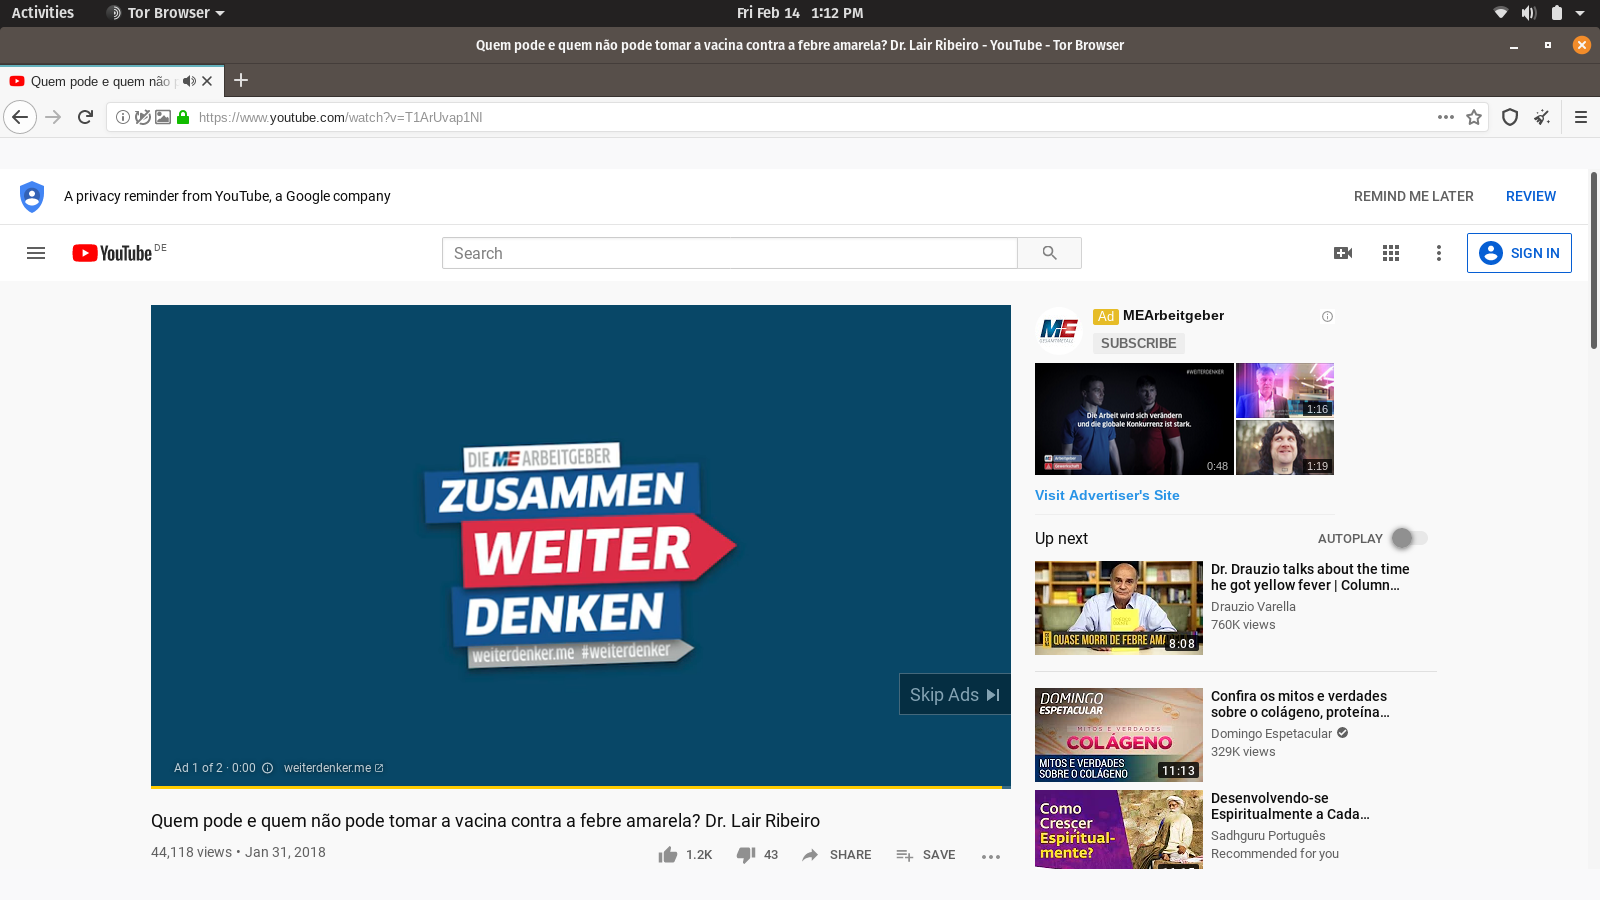

Supplement: Supplementary file 5 [file 25261583 › yt_recommendation/screenshots_m&d/T1ArUvap1NI_3.png]

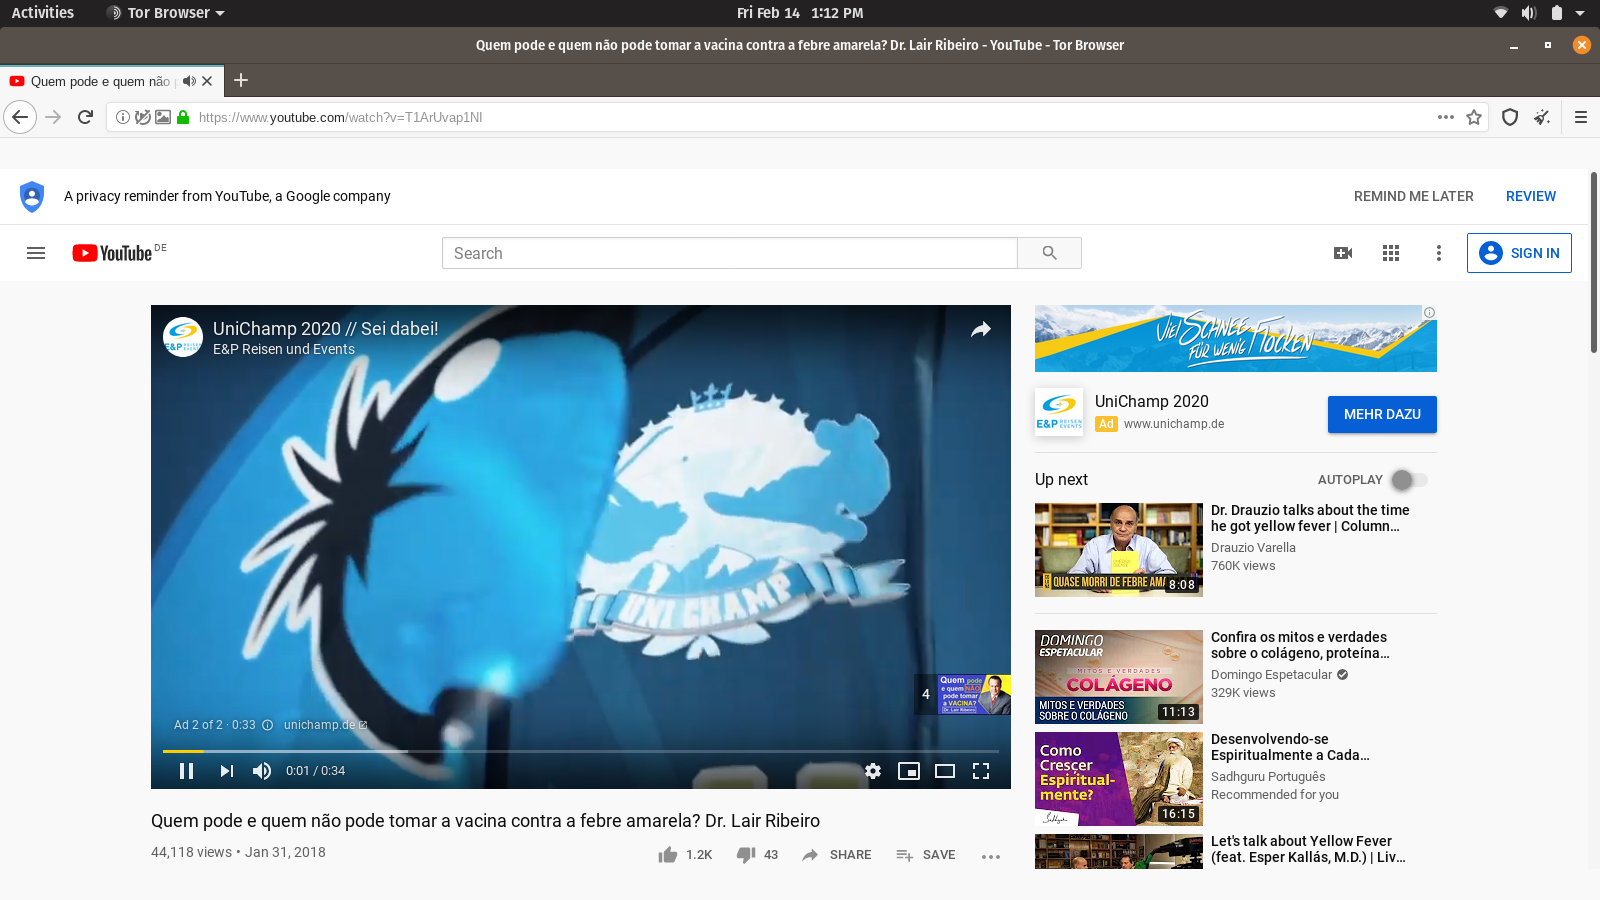

Supplement: Supplementary file 5 [file 25261583 › yt_recommendation/screenshots_m&d/T1ArUvap1NI_4.png]

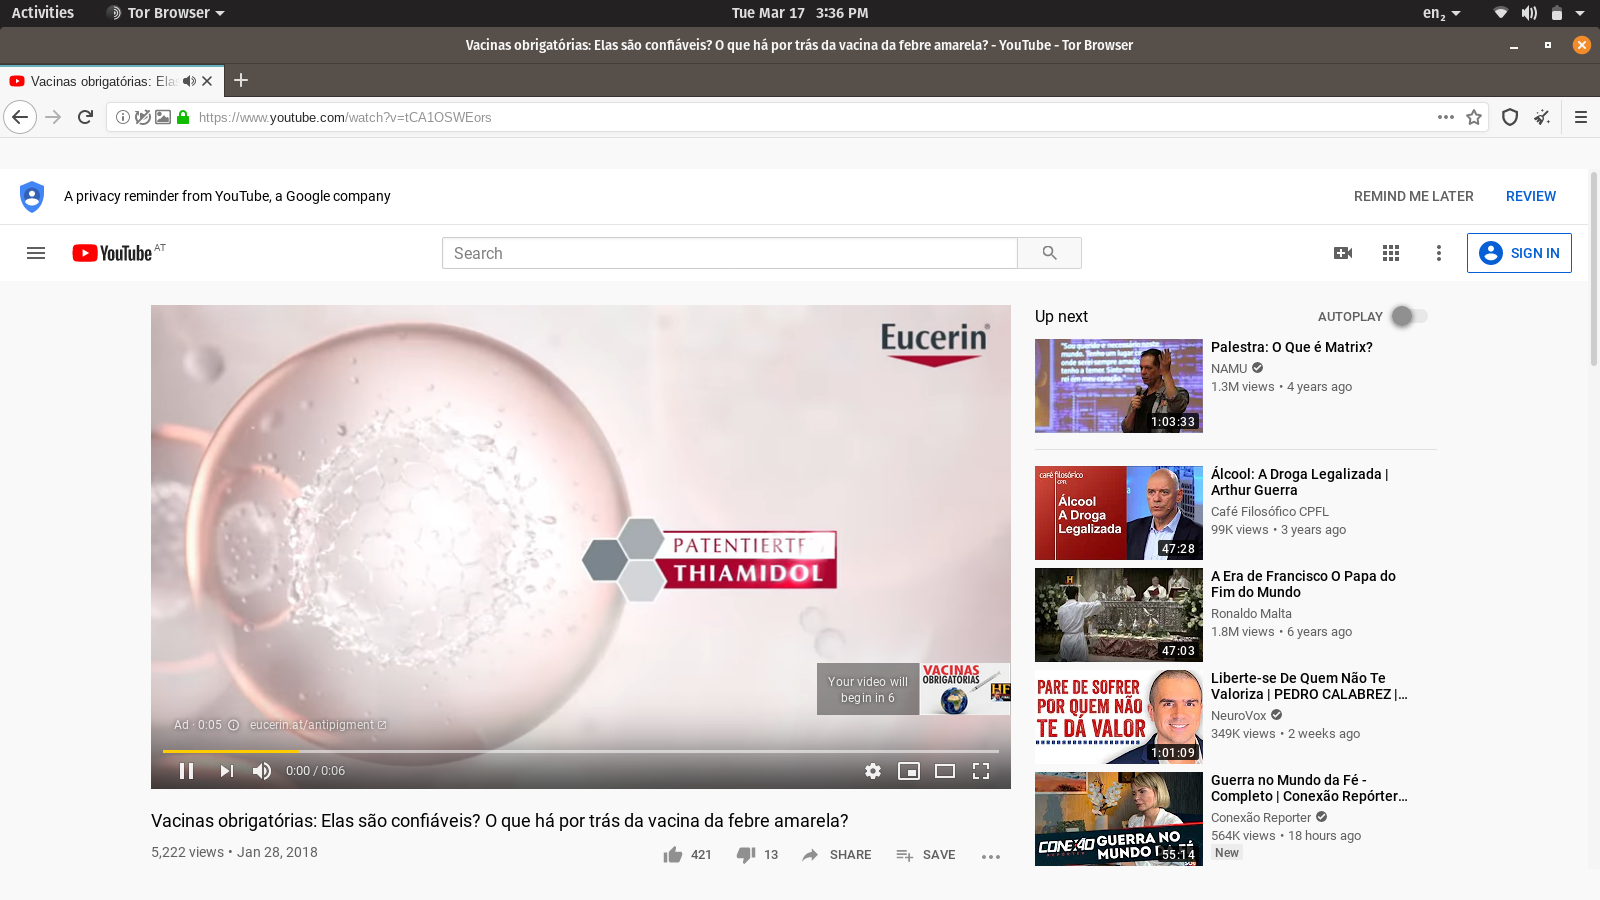

Supplement: Supplementary file 5 [file 25261583 › yt_recommendation/screenshots_m&d/tCA1OSWEors.png]

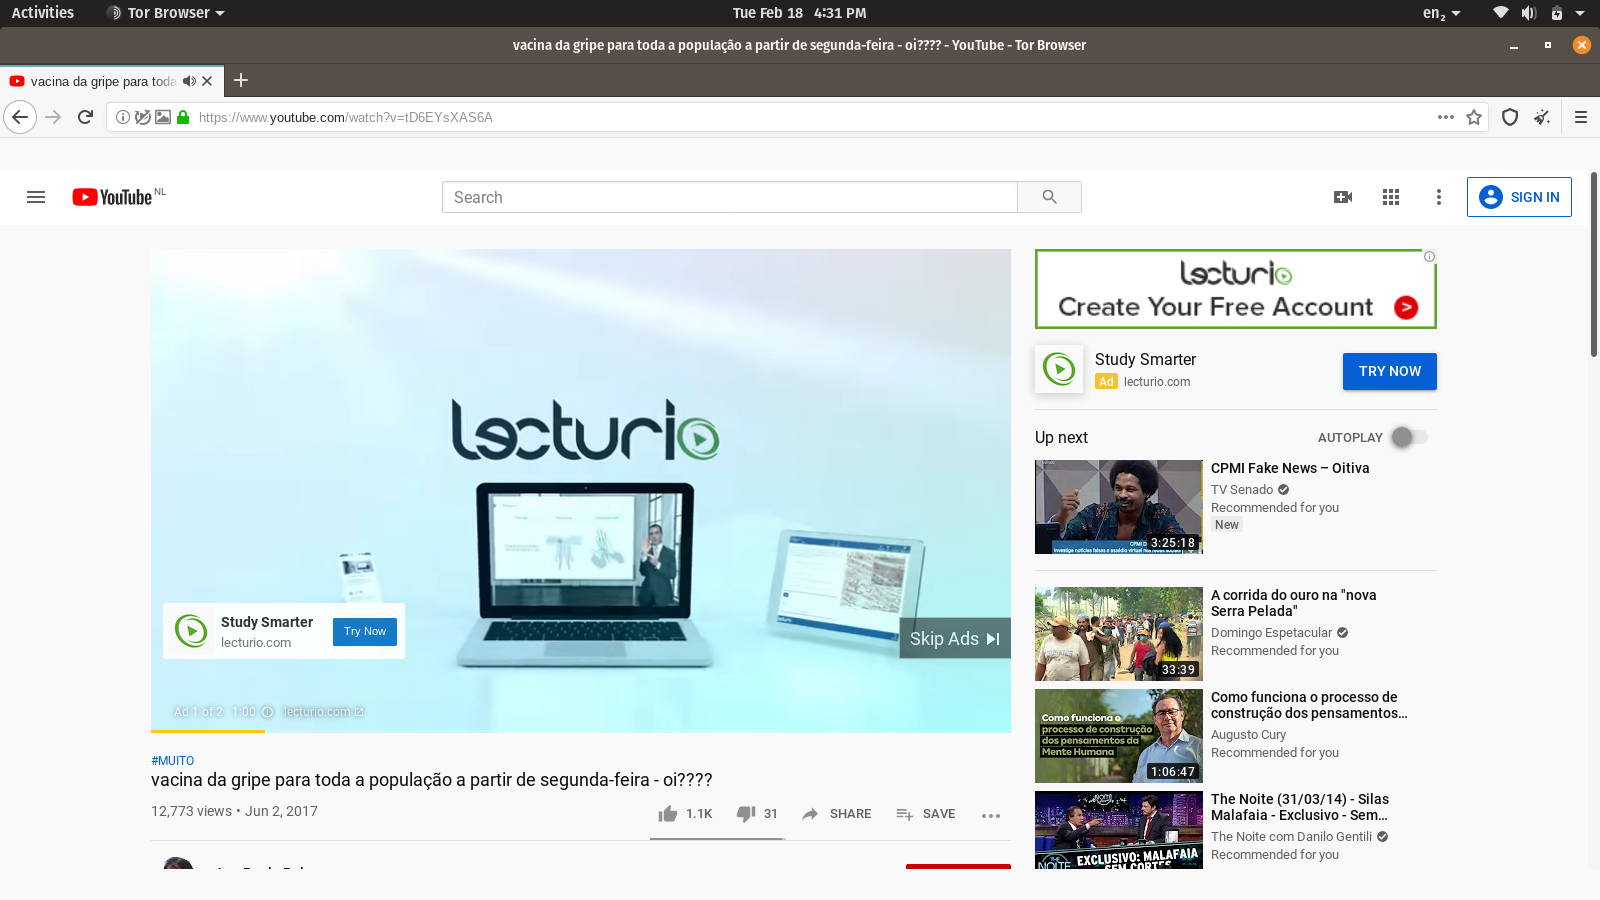

Supplement: Supplementary file 5 [file 25261583 › yt_recommendation/screenshots_m&d/tD6EYsXAS6A_1.png]

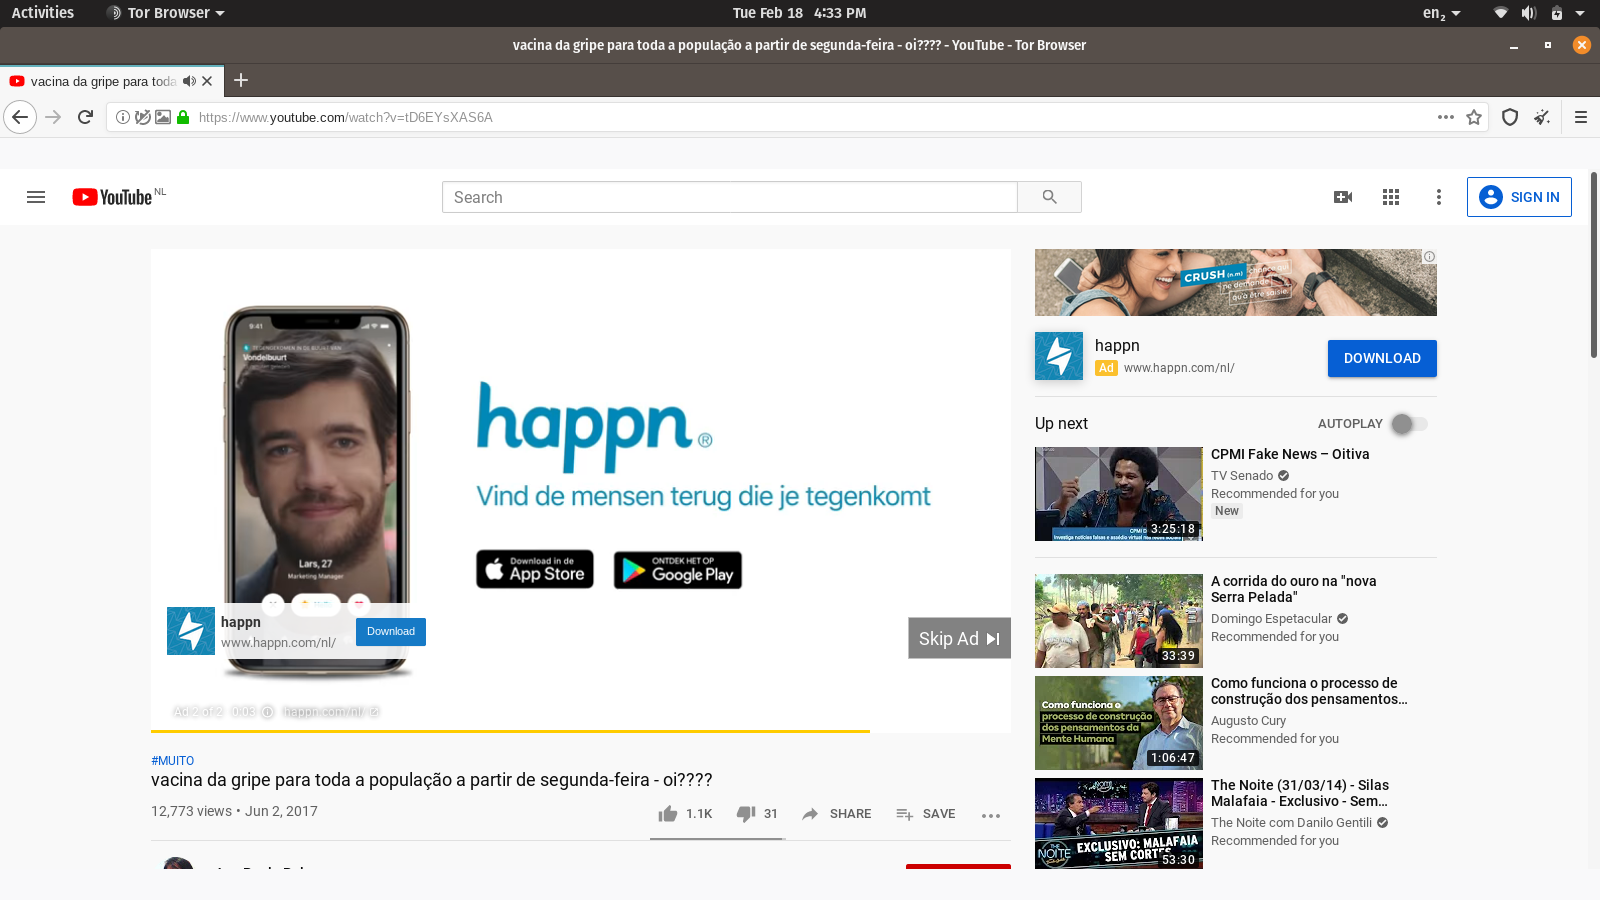

Supplement: Supplementary file 5 [file 25261583 › yt_recommendation/screenshots_m&d/tD6EYsXAS6A_2.png]

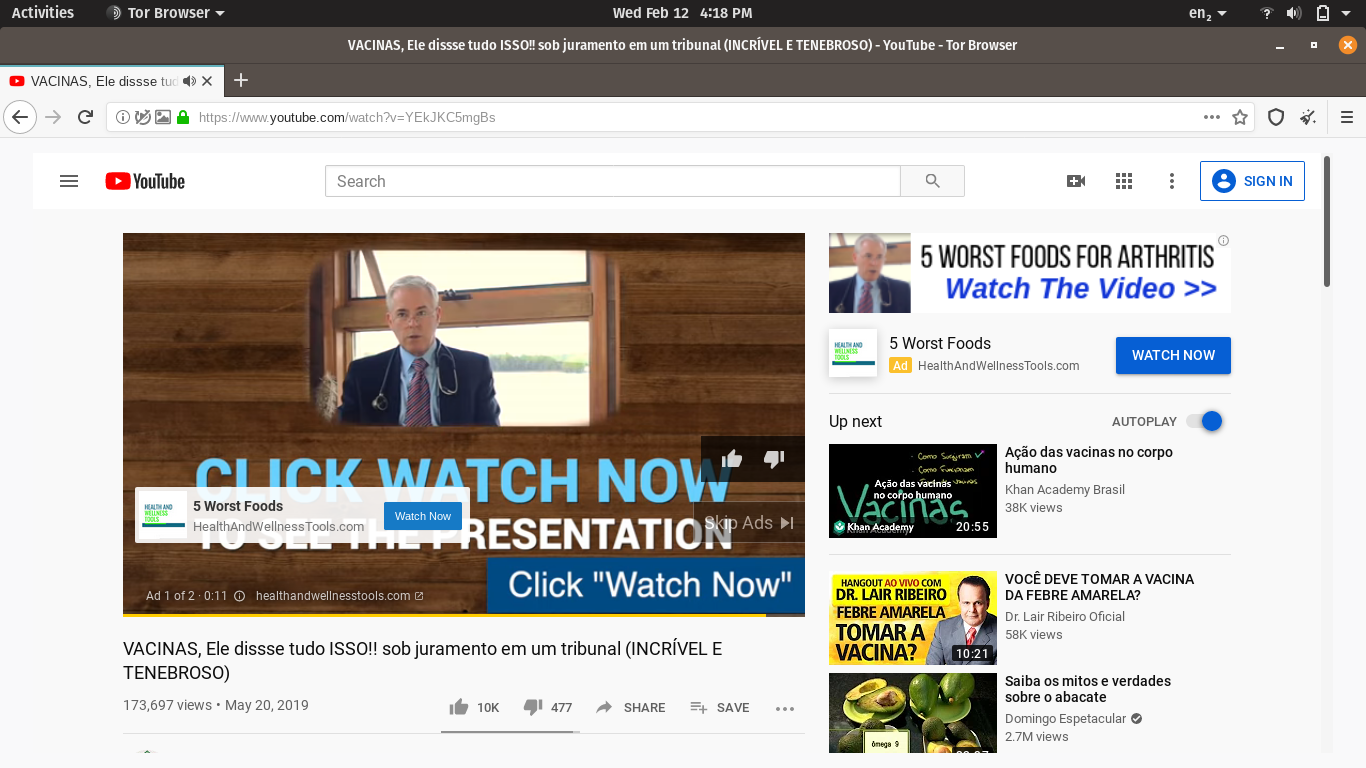

Supplement: Supplementary file 5 [file 25261583 › yt_recommendation/screenshots_m&d/YEkJKC5mgBs_1.png]

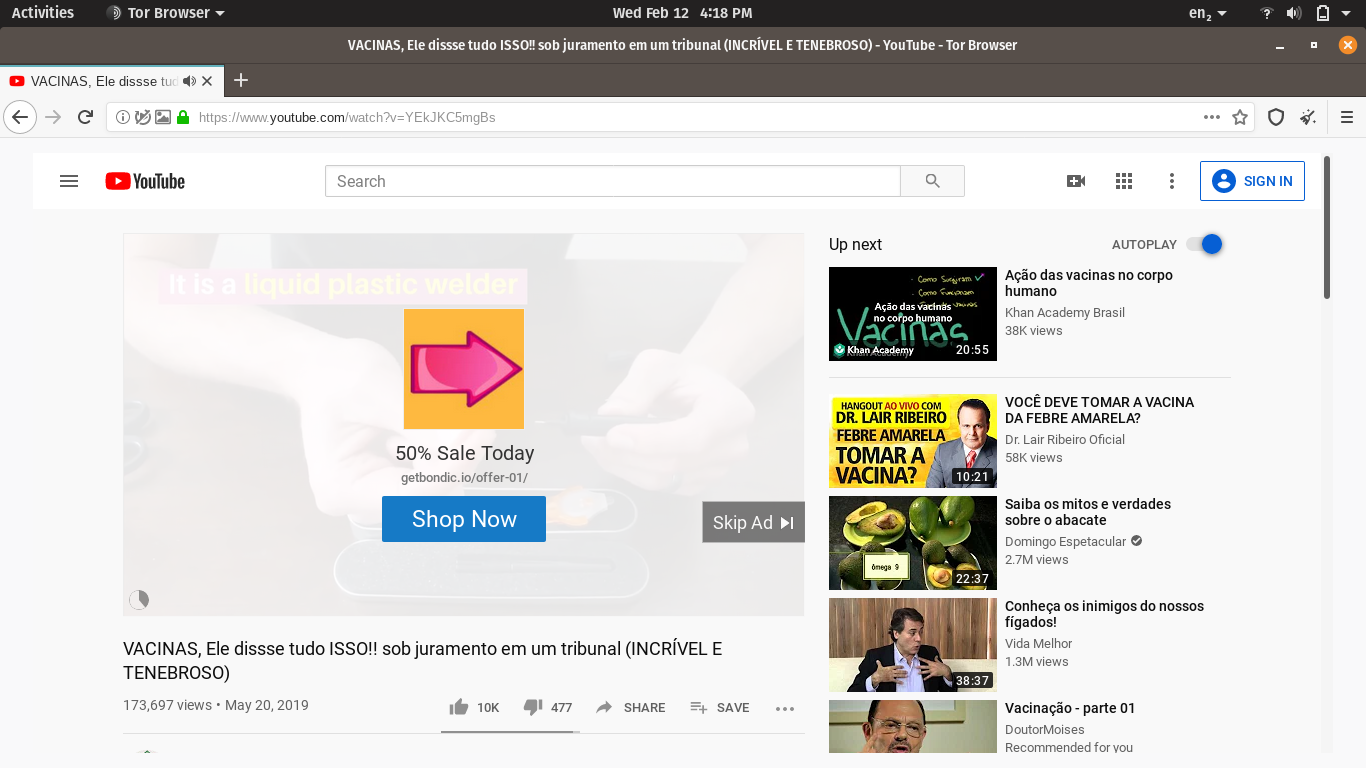

Supplement: Supplementary file 5 [file 25261583 › yt_recommendation/screenshots_m&d/YEkJKC5mgBs_2.png]
